# Supplementary material for: Proteome dynamics during homeostatic scaling in cultured neurons
Source: eLife. 2020 Apr 2;9:e52939. doi: 10.7554/eLife.52939 (PMC7117909; doi:10.7554/eLife.52939)
Supplement: Figure 2—source data 1. [file elife-52939-fig2-data1.xlsx]

## Sheet: Sheet 1
Figure 2 - Source Data 1: Protein regulation during homeostatic up- and down-scaling.
				BIC vs Ctrl							TTX vs Ctrl
				Nascent proteins (regulated by synthesis)			Pre-existing proteins (regulated by degradation)			Regulation	Nascent proteins (regulated by synthesis)			Pre-existing proteins (regulated by degradation)			Regulation
Protein group ID	Uniprot Identifier	Protein Names	Gene Names	p-value	log2 fold change	Significance level after Benajmini-Hochberg correction	p-value	log2 fold change	Significance level after Benajmini-Hochberg correction		p-value	log2 fold change	Significance level after Benajmini-Hochberg correction	p-value	log2 fold change	Significance level after Benajmini-Hochberg correction
6170	Q62670;Q63011;Q6PDU6;Q62669;Q63223		0 beta-2 globin;Hbb-b1	NA	NA	NA	NA	NA	NA	NA	0.0622593	-0.190261	ns	0.202974	0.159612	ns	unchanged
2322	D3ZNS8		Aaas	0.831144	0.0650917	ns	0.0855573	0.102652	ns	unchanged	0.266902	-0.013057	ns	0.892978	-0.0248087	ns	unchanged
4722	P17105	Inositol-trisphosphate 3-kinase A	Itpka	1.61114e-26	-0.80462	FDR1%	0.557744	0.0247249	ns	less syn	2.35806e-34	-0.730988	FDR1%	0.0469812	-0.100312	ns	less syn
1352	B0K024;G3V7V2;A0A0G2JWU9		Aamp	0.546658	0.0810035	ns	0.00592468	0.52097	ns	unchanged	NA	NA	NA	NA	NA	NA	NA
1384	B1VKB4;Q9Z327-3;Q9Z327-2;A0A0H2UHQ9;Q9Z327	Synaptopodin	Synpo	3.79654e-18	-0.656536	FDR1%	5.98383e-11	-0.397802	FDR1%	less syn & more deg	2.58301e-09	-0.500746	FDR1%	0.00373036	-0.217088	ns	less syn
5630	Q505J7		Gal3st3	2.82874e-10	-0.72827	FDR1%	0.07731	0.382851	ns	less syn	6.77888e-06	-0.522918	FDR1%	0.517573	-0.150712	ns	less syn
4944	P50554	4-aminobutyrate aminotransferase, mitochondrial;4-aminobutyrate aminotransferase, brain isoform;4-aminobutyrate aminotransferase, liver isoform	Abat	0.00709046	-0.123987	ns	0.312261	0.0166716	ns	unchanged	9.61845e-05	-0.121017	FDR1%	1.3928e-06	-0.0512928	FDR1%	less syn & more deg
4654	P11275;F1LZG4;A0A0G2JUV8;Q924T0	Calcium/calmodulin-dependent protein kinase type II subunit alpha	Camk2a	1.59846e-19	-0.694622	FDR1%	0.00284598	0.0455644	ns	less syn	0.000225748	0.280336	FDR1%	1.81593e-09	0.243632	FDR1%	more syn & less deg
5878	Q5PPI4	Lysosome-associated membrane glycoprotein 5	Lamp5	0.786489	-0.206665	ns	0.109467	0.111162	ns	unchanged	6.27248e-05	-1.00701	FDR1%	0.550313	0.0701246	ns	less syn
2096	D4A404;D3ZFY7;D4A2Q3		Psd3	7.71688e-09	-0.69164	FDR1%	0.557704	0.0307253	ns	less syn	0.317736	0.0829221	ns	0.360024	0.0298681	ns	unchanged
1977	D3ZXD2;D3ZCF8		Abca8a	0.225411	0.0278383	ns	0.0151079	0.0854126	ns	unchanged	0.39181	-0.0740249	ns	0.945171	0.00574056	ns	unchanged
4489	O70595;A0A0G2K4U1;Q9Z1S2	ATP-binding cassette sub-family B member 6, mitochondrial	Abcb6	0.998705	-0.165674	ns	0.289196	0.0783871	ns	unchanged	0.85582	0.0170334	ns	0.242807	0.0378982	ns	unchanged
5130	P63249	cAMP-dependent protein kinase inhibitor alpha	Pkia	2.352e-06	-0.686333	FDR1%	0.00323869	-0.193982	ns	less syn	0.000545108	0.513728	FDR1%	0.00736391	0.283295	ns	more syn
5958	Q5RKI8;A0A0H2UHH3	ATP-binding cassette sub-family B member 8, mitochondrial	Abcb8	0.219372	-0.146277	ns	0.500362	0.0162779	ns	unchanged	0.942821	-0.0701972	ns	0.153598	-0.0221147	ns	unchanged
7091	Q9QYJ4;A0A0A0MY39;Q9QYJ4-3;Q9QYJ4-4;Q9QYJ4-2	ATP-binding cassette sub-family B member 9	Abcb9	0.37877	-0.115723	ns	0.011378	0.0463546	ns	unchanged	0.0260491	-0.207799	ns	0.285247	0.00847898	ns	unchanged
5764	Q5FVL8		Abcb10	0.345673	-0.102242	ns	0.622376	0.0446285	ns	unchanged	NA	NA	NA	NA	NA	NA	NA
4718	P16970	ATP-binding cassette sub-family D member 3	Abcd3	0.0138762	-0.0708137	ns	0.0295255	0.123743	ns	unchanged	0.0260942	0.0116332	ns	0.00813125	0.125921	ns	unchanged
4456	O54701;O54701-2	Sodium/potassium/calcium exchanger 2	Slc24a2	0.000106911	-0.660008	FDR1%	0.143794	0.081869	ns	less syn	0.119717	0.263649	ns	0.32945	0.178235	ns	unchanged
6619	Q6MG08	ATP-binding cassette sub-family F member 1	Abcf1	0.00725391	-0.142768	ns	0.0126773	0.267934	ns	unchanged	0.00381393	-0.163823	ns	0.0381253	-0.203225	ns	unchanged
1406	B1WBW9;Q5I0K5	Mycophenolic acid acyl-glucuronide esterase, mitochondrial	Abhd10	0.30463	-0.173622	ns	0.648699	0.0490465	ns	unchanged	0.570966	-0.124421	ns	0.967896	0.00582718	ns	unchanged
6720	Q6QMG6;Q6QMG5;F1M3J4;F1LR52;Q59DL1;Q91Y23		Abcc4	NA	NA	NA	NA	NA	NA	NA	0.829012	-0.0598714	ns	0.867506	-0.130924	ns	unchanged
6972	Q99P74	Ras-related protein Rab-27B	Rab27b	0.0172561	0.214074	ns	0.155894	0.200142	ns	unchanged	1.56514e-08	-0.859199	FDR1%	0.0416298	0.1839	ns	less syn
6624	Q6MG55;A0A0G2K0X5;A0A0G2K4N8;A0A096MJC0;A0A096MKA7	Abhydrolase domain-containing protein 16A	Abhd16a	0.465476	-0.18937	ns	0.0795044	0.0833367	ns	unchanged	0.0926368	-0.141355	ns	0.583515	-0.0182916	ns	unchanged
2013	D3ZDH8;Q9JJM9-2	Septin-5	Sept5	3.24603e-08	-0.659093	FDR1%	0.0246065	-0.132813	ns	less syn	2.28178e-08	-0.583766	FDR1%	0.0206582	0.116462	ns	less syn
4759	P19969	Gamma-aminobutyric acid receptor subunit alpha-5	Gabra5	3.68558e-14	-0.658543	FDR1%	0.00315583	0.161173	ns	less syn	0.000969175	-0.231283	FDR1%	0.893804	-0.018381	ns	less syn
1994	D3ZCV0		Actn2	6.51047e-16	-0.451183	FDR1%	1.91192e-06	-0.21123	FDR1%	less syn & more deg	2.6243e-31	-0.673723	FDR1%	9.1979e-08	-0.154811	FDR1%	less syn & more deg
3961	G3V6X7;Q9QXU9	ProSAAS;KEP;Big SAAS;Little SAAS;Big PEN-LEN;PEN;PEN-20;Little LEN;Big LEN	Pcsk1n	0.00825739	-0.191502	ns	0.270686	-0.154786	ns	unchanged	8.85431e-17	1.31688	FDR1%	7.73584e-11	0.910705	FDR1%	more syn & less deg
2625	D3ZXK4		Abhd11	0.12215	-0.0815937	ns	0.123821	0.0128332	ns	unchanged	0.0514394	0.11467	ns	0.239278	0.0012858	ns	unchanged
3619	F1M0N1	Non-specific protein-tyrosine kinase	Abl2	0.174377	-0.0897961	ns	0.647863	0.0474723	ns	unchanged	0.607809	0.150897	ns	0.0695009	0.133865	ns	unchanged
2822	D4A3D4		Abhd3	0.335168	-0.068206	ns	0.674486	0.0767889	ns	unchanged	0.633462	-0.105862	ns	0.184116	-0.0466882	ns	unchanged
3586	F1LYA6;O35823		Abi2	0.0158012	-0.57347	ns	0.373541	0.125558	ns	unchanged	0.540617	-0.0728284	ns	0.387898	0.0926199	ns	unchanged
6629	Q6MG82	Proline-rich transmembrane protein 1	Prrt1	3.53078e-09	-0.65116	FDR1%	0.360325	0.0786318	ns	less syn	0.002957	0.139719	ns	0.0556396	0.131479	ns	unchanged
288	A0A0G2JW01;Q3KR72;E9PT39;A0A0G2K5D0		Ablim1	0.0930232	-0.248592	ns	0.994565	-0.0638678	ns	unchanged	0.323133	-0.0636483	ns	0.500346	0.0602964	ns	unchanged
5136	P63329	Serine/threonine-protein phosphatase 2B catalytic subunit alpha isoform	Ppp3ca	3.28412e-07	-0.648041	FDR1%	0.00499746	-0.103434	ns	less syn	0.132739	0.0858518	ns	0.00298046	0.0971886	ns	unchanged
4202	G3V9U2;A0A0G2K642;P13437	3-ketoacyl-CoA thiolase, mitochondrial	Acaa2	0.143472	-0.0826972	ns	0.0243591	-0.0398488	ns	unchanged	0.731392	-0.0546905	ns	2.93533e-05	-0.115776	FDR1%	more deg
2524	D3ZUW0		Psd3	2.45699e-05	-0.631666	FDR1%	0.989766	-0.0525403	ns	less syn	0.163927	0.132179	ns	0.786737	0.0902608	ns	unchanged
3557	F1LWK7;A0A0G2K7Z4		Ablim1	0.0135251	-0.237611	ns	0.100916	0.0534989	ns	unchanged	0.0580672	-0.157966	ns	0.0396844	0.0438297	ns	unchanged
2430	D3ZSL2;Q5FVK7		Abracl	0.00704243	-0.208436	ns	0.874166	0.0919187	ns	unchanged	0.0477136	0.133019	ns	0.0105256	0.276015	ns	unchanged
4378	M0RDK9		Acad8	0.00535558	-0.232018	ns	0.450972	0.0452889	ns	unchanged	0.240136	-0.077229	ns	0.944968	-0.0365291	ns	unchanged
3993	G3V796;P08503	Medium-chain specific acyl-CoA dehydrogenase, mitochondrial	Acadm	0.49233	-0.0491651	ns	0.119303	0.123382	ns	unchanged	0.0416102	-0.21084	ns	0.141398	-0.153378	ns	unchanged
4711	Q6IMX3;P15651	NACHT and WD repeat domain-containing 2	Acads	0.85184	0.0307984	ns	0.191327	0.0326368	ns	unchanged	0.867902	0.0396979	ns	0.309984	-0.0199845	ns	unchanged
3384	F1LPP6;P24587	A-kinase anchor protein 5	Akap5	5.02382e-09	-0.617314	FDR1%	2.35472e-06	-0.21086	FDR1%	less syn & more deg	7.43183e-15	-0.547235	FDR1%	0.499475	0.000954667	ns	less syn
5866	Q5M9H2;P45953	Very long-chain specific acyl-CoA dehydrogenase, mitochondrial	Acadvl	0.669059	-0.0240852	ns	0.792918	0.0244447	ns	unchanged	0.0169058	-0.13606	ns	0.459447	-0.0127885	ns	unchanged
708	A0A0G2K4T3;Q5FVC7	Arf-GAP with coiled-coil, ANK repeat and PH domain-containing protein 2	Acap2	0.00486795	-0.243264	ns	0.0230617	0.125815	ns	unchanged	0.0588403	-0.159808	ns	0.277662	0.0271433	ns	unchanged
2867	D4A4F9		LOC682489	4.31265e-05	-0.611702	FDR1%	0.999894	-0.00904132	ns	less syn	0.400451	-0.0804561	ns	5.45579e-05	0.286935	FDR1%	less deg
6807	Q7TP61;Q5XI22;F1LS48;A0A0G2JUB4;D3ZKB6;A0A096MJY8	Acetyl-CoA acetyltransferase, cytosolic	Acat2;RGD1562948	0.0145887	-0.19538	ns	0.158162	0.0236952	ns	unchanged	1.30065e-06	-0.311382	FDR1%	8.40829e-08	0.166184	FDR1%	slower turnover
810	G3V6E4;Q5XI18;A0A0G2K756;Q7TNY6	Golgi resident protein GCP60	Acbd3	0.59075	-0.0325422	ns	0.0285449	0.153539	ns	unchanged	0.0739072	-0.116108	ns	0.992417	-0.0406627	ns	unchanged
24	A0A096MJJ6;B1H213;A0FKI7-2;A0FKI7;A0FKI7-3;M0R9S4;A0A0G2K3Z5	Acyl-CoA-binding domain-containing protein 5	Acbd5;LOC100910957	0.138359	-0.1004	ns	0.993608	0.054579	ns	unchanged	0.538081	-0.086838	ns	0.120715	-0.00953807	ns	unchanged
5922	Q5RJK8	Acyl-CoA-binding domain-containing protein 6	Acbd6	0.282184	-0.0431065	ns	0.164573	0.11754	ns	unchanged	0.706759	0.0693789	ns	0.00709961	0.177573	ns	unchanged
4922	P47971;A0A0H2UHC1	Neuronal pentraxin-1	Nptx1	1.39183e-19	-0.611352	FDR1%	0.138825	-0.0391847	ns	less syn	2.2725e-37	1.13584	FDR1%	6.49433e-26	0.80769	FDR1%	more syn & less deg
7050	Q9JK00	Sodium channel subunit beta-3	Scn3b	0.000679049	-0.605658	FDR1%	0.309223	0.0296086	ns	less syn	1.47285e-05	0.472908	FDR1%	0.00228568	0.167862	ns	more syn
4832	P31016;A0A0G2K7F5;P97630	Disks large homolog 4	Dlg4	3.43512e-30	-0.599269	FDR1%	0.166744	-0.0594275	ns	less syn	0.00801709	0.07943	ns	1.64072e-07	0.208349	FDR1%	less deg
4660	P11506;P11506-14	Plasma membrane calcium-transporting ATPase 2	Atp2b2	0.00128505	-0.753386	FDR1%	0.00112311	-0.19777	FDR1%	less syn & more deg	0.0185872	-0.337043	ns	0.0303224	-0.37094	ns	unchanged
6178	Q62747-2;Q62747-3;Q62747-5;Q62747-8;Q62747-4;Q62747-6;Q62747-7;Q62747		Syt7	2.57011e-09	-0.592394	FDR1%	0.1559	-0.0173005	ns	less syn	1.16384e-14	0.620452	FDR1%	0.267525	0.0516789	ns	more syn
4710	P15650		Acadl	0.302086	0.0516329	ns	0.0178842	0.0705577	ns	unchanged	0.577893	-0.0136065	ns	0.0178432	-0.0664514	ns	unchanged
4470	Q6IMX8;O55171	Acyl-coenzyme A thioesterase 2, mitochondrial	Acot2	0.174899	0.0999347	ns	0.635745	0.0440513	ns	unchanged	0.706769	-0.101377	ns	0.696152	-0.0158188	ns	unchanged
3245	E9PST5		Acin1	0.0911319	-0.163544	ns	0.861754	0.0796876	ns	unchanged	0.167953	-0.0654779	ns	0.238725	-0.0164241	ns	unchanged
3984	G3V746;Q00960	Glutamate receptor ionotropic, NMDA 2B	Grin2b	3.14984e-29	-0.585863	FDR1%	0.0600965	0.0937683	ns	less syn	0.455583	0.0284912	ns	0.00240226	0.169622	ns	unchanged
7169_m	Q9Z214;A0A0H2UI35;Q9Z214-2;Q9Z214-3;Q811R0;Q811R1;A0A0G2JYD5	Homer protein homolog 1	Homer1	2.27149e-21	-0.548062	FDR1%	1.9196e-09	-0.181663	FDR1%	less syn & more deg	2.39182e-09	-0.349204	FDR1%	0.00719406	0.0971885	ns	less syn
3403	F1LQC1;P07872-2;P07872;F1M609	Acyl-coenzyme A oxidase;Peroxisomal acyl-coenzyme A oxidase 1;Peroxisomal acyl-CoA oxidase 1, A chain;Peroxisomal acyl-CoA oxidase 1, B chain;Peroxisomal acyl-CoA oxidase 1, C chain	Acox1	0.75397	0.0117126	ns	0.361922	0.161531	ns	unchanged	0.0038402	-0.146543	ns	0.72316	-0.0605065	ns	unchanged
6221	Q63092;A0A0G2K1R5	CaM kinase-like vesicle-associated protein	Camkv	1.49063e-27	-0.578002	FDR1%	0.557168	-0.0346112	ns	less syn	0.80334	0.0132331	ns	0.0070449	0.0876543	ns	unchanged
4893	Z4YNF4;P41498	Low molecular weight phosphotyrosine protein phosphatase	Acp1	0.56635	-0.0349458	ns	0.343083	0.150801	ns	unchanged	0.295532	-0.0438922	ns	0.331158	0.210895	ns	unchanged
1907	D3ZA93		Acot13	0.0492984	-0.12711	ns	0.155043	0.0244893	ns	unchanged	0.660774	-0.0142229	ns	0.0713532	-0.0344368	ns	unchanged
6943	Q924N5	Long-chain-fatty-acid--CoA ligase ACSBG1	Acsbg1	0.205347	-0.100959	ns	0.767341	0.0150367	ns	unchanged	0.0684823	0.129516	ns	0.270556	0.0373013	ns	unchanged
5469	Q499N5	Acyl-CoA synthetase family member 2, mitochondrial	Acsf2	0.0930173	-0.181951	ns	0.353125	-0.0109898	ns	unchanged	0.975011	0.011641	ns	0.00026648	-0.0922883	FDR1%	more deg
5217	P97610	Synaptotagmin-12	Syt12	3.68885e-07	-0.576218	FDR1%	0.230835	0.0743576	ns	less syn	2.26319e-10	-0.739589	FDR1%	0.927972	0.115815	ns	less syn
5488	Q4FZU0		Acp6	0.990097	-0.0111677	ns	0.561777	-0.10479	ns	unchanged	0.187309	-0.0656552	ns	0.736847	0.0391274	ns	unchanged
2955	D4A6U1;A0A1W2Q6C2		Adam11	2.44315e-14	-0.575062	FDR1%	0.197187	-0.070243	ns	less syn	4.43746e-10	-0.440305	FDR1%	0.854425	-0.00333655	ns	less syn
2526	D3ZUX7		Acsf3	0.685972	0.00893283	ns	0.367383	0.0194239	ns	unchanged	0.0550569	-0.126354	ns	0.662762	-0.0312339	ns	unchanged
5539	Q4KM87		Actl6a	0.0309468	0.199567	ns	0.327176	0.0943035	ns	unchanged	0.508299	0.102846	ns	0.370861	0.0530119	ns	unchanged
4850	P33124	Long-chain-fatty-acid--CoA ligase 6	Acsl6	0.0675675	-0.349064	ns	0.0790018	-0.168659	ns	unchanged	0.012659	-0.426542	ns	0.0518837	-0.0957212	ns	unchanged
2695	D3ZZN3	Acetyl-coenzyme A synthetase	Acss1	0.00961186	-0.183803	ns	0.162628	0.0439646	ns	unchanged	9.97499e-05	0.135952	FDR1%	0.0287	-0.0544833	ns	more syn
5018	P60711	Actin, cytoplasmic 1;Actin, cytoplasmic 1, N-terminally processed	Actb	0.0244896	-0.28165	ns	0.490912	0.00516984	ns	unchanged	0.0186649	-0.318901	ns	0.953231	-0.00309457	ns	unchanged
7166	Q9Z1T4;Q9Z1T4-2	Connector enhancer of kinase suppressor of ras 2	Cnksr2	2.6565e-16	-0.573573	FDR1%	0.950974	0.0114643	ns	less syn	1.68608e-12	-0.395682	FDR1%	0.0429849	0.123999	ns	less syn
4932	P49620	Diacylglycerol kinase gamma	Dgkg	1.05955e-14	-0.567281	FDR1%	0.0310794	0.0953233	ns	less syn	4.09421e-12	0.384655	FDR1%	0.236224	0.0892092	ns	more syn
3103	G3V9H1;D4AB55;O08774;A0A0G2K326;O08774-2	Regulator of G-protein signaling 12	Rgs12	8.40037e-08	-0.411394	FDR1%	0.00111007	-0.176305	FDR1%	less syn & more deg	1.21663e-08	-0.659656	FDR1%	0.00801712	-0.0402574	ns	less syn
711	G3V6K8;A0A0G2K4U4;P54283	Voltage-dependent L-type calcium channel subunit beta-1	Cacnb1	5.95523e-11	-0.566533	FDR1%	0.543014	-0.0273363	ns	less syn	1.40278e-08	0.424675	FDR1%	9.30616e-11	0.624307	FDR1%	more syn & less deg
1923	D3ZAS2		Sgsm1	2.65648e-10	-0.563196	FDR1%	0.108051	-0.105836	ns	less syn	0.0924764	0.178211	ns	4.67445e-06	0.354432	FDR1%	less deg
4071	G3V849;P97836	Disks large-associated protein 1	Dlgap1	NA	NA	NA	NA	NA	NA	NA	0.0652519	0.120317	ns	0.000522369	0.406133	FDR1%	less deg
5195	P85515	Alpha-centractin	Actr1a	0.872701	-0.124035	ns	0.392968	0.175547	ns	unchanged	0.93421	-0.0140959	ns	0.0804786	0.120473	ns	unchanged
6579	Q6GMN2-2;Q6GMN2	Brain-specific angiogenesis inhibitor 1-associated protein 2	Baiap2	1.3534e-29	-0.556294	FDR1%	0.963045	0.00770293	ns	less syn	5.21616e-09	0.213161	FDR1%	0.000876511	0.16196	FDR1%	more syn & less deg
4483	O70441;A0A096MIT7	Synapsin-3	Syn3	0.469456	-0.0846426	ns	0.00148361	-0.172215	FDR1%	more deg	0.630179	-0.0376186	ns	0.0826424	0.0564988	ns	unchanged
1531	B2RYJ7		Actr1b	0.149563	-0.0836887	ns	0.0281332	0.194021	ns	unchanged	0.019846	-0.122764	ns	0.0760218	0.12805	ns	unchanged
3583	F1LY09		Actr3b	0.107101	-0.137391	ns	0.791526	-0.00597614	ns	unchanged	0.104547	-0.196872	ns	0.25797	0.0636593	ns	unchanged
1631	B3DM96;P80201;A0A0G2K2P7	Serine/threonine-protein kinase receptor;Activin receptor type-1	Acvr1	0.0395623	-0.13821	ns	0.00734022	0.202989	ns	unchanged	0.56695	0.0945102	ns	0.713787	0.113271	ns	unchanged
6554	Q6AYS7	Aminoacylase-1A	Acy1a	0.6911	-0.0754873	ns	0.741641	-0.0205002	ns	unchanged	0.573915	-0.111389	ns	0.186573	0.152267	ns	unchanged
1584	B2RZ09;P0C5H9	Mesencephalic astrocyte-derived neurotrophic factor	Manf	0.27824	-0.0420825	ns	0.00181514	-0.163988	FDR1%	more deg	2.38787e-10	-0.314677	FDR1%	8.57044e-05	-0.212793	FDR1%	less syn & more deg
4525	O88954;Q33DY7	MAGUK p55 subfamily member 3	Mpp3	4.24358e-09	-0.540417	FDR1%	0.494251	0.0138455	ns	less syn	1.93162e-08	-0.493747	FDR1%	0.744446	-0.0244001	ns	less syn
727	A0A0G2K562;Q10743	Disintegrin and metalloproteinase domain-containing protein 10	Adam10	0.144558	-0.0877179	ns	0.00660433	0.164217	ns	unchanged	0.652937	-0.0221527	ns	0.0243429	0.084615	ns	unchanged
3718	F1M7L6;P47868	Secretogranin-3	Scg3	NA	NA	NA	NA	NA	NA	NA	7.03106e-21	1.15711	FDR1%	1.49097e-12	0.939152	FDR1%	more syn & less deg
1742	B5DF95;A0A0G2K782		Zc2hc1a	0.0831332	-0.275923	ns	0.0017272	-0.159916	FDR1%	more deg	0.103963	0.192442	ns	0.000679615	0.205267	FDR1%	less deg
519	A0A0G2K0M8	Submitted name: Neural cell adhesion molecule 1	Ncam1	0.0144925	-0.0859747	ns	2.20187e-06	-0.132354	FDR1%	more deg	0.310057	-0.0683529	ns	0.143941	0.101712	ns	unchanged
4747_m	P19492;P19492-2;G3V6Z5;G3V8Y9	Glutamate receptor 3	Gria3	2.16277e-07	-0.534676	FDR1%	0.740747	0.0753193	ns	less syn	1.43841e-06	-0.387447	FDR1%	0.452103	0.0362784	ns	less syn
6954	Q99JD4	CLIP-associating protein 2	Clasp2	1.7761e-08	-0.532243	FDR1%	0.00841794	-0.114747	ns	less syn	0.0004307	-0.216434	FDR1%	0.844112	-0.024168	ns	less syn
7051	Q9JK11-3	Reticulon-4	Rtn4	2.2569e-06	-0.527593	FDR1%	0.0684668	0.0770263	ns	less syn	0.317997	0.0542431	ns	0.145006	0.0556135	ns	unchanged
6294	Q63942	GTP-binding protein Rab-3D	Rab3d	1.48971e-07	-0.523973	FDR1%	0.181306	0.0327543	ns	less syn	0.789756	-0.0795289	ns	0.000322747	0.118649	FDR1%	less deg
6474	Q6AY19	AarF domain-containing protein kinase 4	Adck4	0.541898	0.0928142	ns	0.74615	-0.0364026	ns	unchanged	1.96689e-10	-0.294236	FDR1%	4.1533e-07	-0.416298	FDR1%	less syn & more deg
4804	P26769;F1LV12	Adenylate cyclase type 2	Adcy2	0.0211044	-0.291575	ns	0.558761	0.00750993	ns	unchanged	0.124101	-0.178297	ns	0.303648	-0.103019	ns	unchanged
460	A0A0G2JZK7;F1M9A2;P48768	Sodium/calcium exchanger 2	Slc8a2	2.25139e-14	-0.52015	FDR1%	0.175294	0.00718134	ns	less syn	0.00400371	-0.153529	ns	0.00290947	0.0969304	ns	unchanged
124	A0A0G2JSM7;Q63028;Q63028-2	Alpha-adducin	Add1	0.184966	-0.115567	ns	0.349987	-0.074332	ns	unchanged	0.677849	-0.0921724	ns	0.271294	-0.048125	ns	unchanged
4745_m	P19490;P19490-2	Glutamate receptor 1	Gria1	3.9677e-09	-0.515667	FDR1%	0.095197	0.060152	ns	less syn	0.00132859	0.203464	FDR1%	0.302725	0.14346	ns	more syn
4860	P35332;Q9QWR2	Hippocalcin-like protein 4	Hpcal4	1.19275e-16	-0.511654	FDR1%	0.0038354	0.116849	ns	less syn	2.28247e-13	-0.296146	FDR1%	0.508866	-0.0369995	ns	less syn
2410	D3ZRJ0		Adck1	0.239232	-0.176206	ns	0.573415	0.0197129	ns	unchanged	0.074761	-0.172419	ns	0.601974	0.00198578	ns	unchanged
6194	Q62847-2;Q62847	Gamma-adducin	Add3	0.324415	0.112744	ns	0.226825	0.0275044	ns	unchanged	0.466413	0.0739307	ns	0.383251	0.117697	ns	unchanged
5122	P63100;P63100-2;A0A0H2UHV6;A0A0G2K4H3;P28470	Calcineurin subunit B type 1;Calcineurin subunit B type 2	Ppp3r1;Ppp3r2	2.69437e-17	-0.509483	FDR1%	0.791819	-0.00422166	ns	less syn	0.35353	0.0442379	ns	3.7628e-08	0.186442	FDR1%	less deg
3320	F1LMW3;Q8K3V3	G-protein coupled receptor 56;GPR56 N-terminal fragment;GPR56 C-terminal fragment	Adgrg1;Gpr56	0.080963	-0.209961	ns	0.0479566	0.103946	ns	unchanged	0.00308143	0.155146	ns	0.0718386	0.180023	ns	unchanged
2679	D3ZZ99		Add1	0.125924	-0.203737	ns	0.0552969	-0.142522	ns	unchanged	0.681708	0.0896116	ns	0.444057	0.0613447	ns	unchanged
120	A0A0G2JSL8;A0A0G2K6X9;Q64640	Adenosine kinase	Adk	0.141381	-0.205222	ns	0.0147872	0.2004	ns	unchanged	0.308963	-0.222868	ns	0.00474507	0.181817	ns	unchanged
7060	Q9JKL8	Activity-dependent neuroprotector homeobox protein	Adnp	0.00394092	-0.187924	ns	0.0393507	0.241849	ns	unchanged	0.0122704	0.176682	ns	0.189666	0.0702394	ns	unchanged
292	A0A0G2JW28;D3ZCH7;G3V9D7		Add3	0.0743198	-0.0829909	ns	0.408105	0.00273296	ns	unchanged	0.128893	-0.0897817	ns	0.225296	0.0464181	ns	unchanged
784	A0A0G2K6N2;D3ZN99		Adgrb2	NA	NA	NA	NA	NA	NA	NA	0.651441	0.228297	ns	0.592027	0.0384449	ns	unchanged
1886	D3Z9H2		Hapln4	8.08839e-08	-0.507263	FDR1%	0.648897	-0.00957698	ns	less syn	0.0707236	0.513698	ns	0.00132201	0.320002	FDR1%	less deg
577	A0A0G2K1Q9;Q9JMB3;A3E0T0		Epb41l3	0.319117	-0.0471246	ns	0.00030449	-0.127071	FDR1%	more deg	0.00532391	-0.335029	ns	0.373187	0.0537763	ns	unchanged
3991	G3V784;Q5D001		Adpgk	0.00636828	0.198846	ns	0.00637847	0.205165	ns	unchanged	0.408836	-0.111695	ns	0.365132	0.0853432	ns	unchanged
1347	B0K017		Adprhl2	0.776583	-0.0309544	ns	0.213864	0.0385007	ns	unchanged	0.0429069	0.0869865	ns	0.00102682	0.106273	FDR1%	less deg
964	A0A0G2KAB2;Q9Z2A6	Mitogen-activated protein kinase 15	Mapk15	3.48845e-09	-0.504147	FDR1%	0.00319669	0.0903085	ns	less syn	1.2786e-08	0.51858	FDR1%	4.93157e-07	0.414677	FDR1%	more syn & less deg
2689	D3ZZK3	Receptor protein-tyrosine kinase	Epha4	3.68851e-34	-0.503517	FDR1%	0.211229	-0.00513574	ns	less syn	1.01456e-06	0.159586	FDR1%	0.541452	0.00301684	ns	more syn
3479	F1LSH6;Q9JKB0	Potassium/sodium hyperpolarization-activated cyclic nucleotide-gated channel 1	Hcn1	0.788789	-0.0455173	ns	0.109204	0.121951	ns	unchanged	1.77469e-13	-0.770434	FDR1%	0.251396	-0.069777	ns	less syn
3430	F1LR33;Q6W5G4	Lipid phosphate phosphatase-related protein type 2	Lppr2	3.12791e-07	-0.502495	FDR1%	0.59513	0.144323	ns	less syn	4.80188e-05	0.282559	FDR1%	0.812371	0.0520401	ns	more syn
3777	F1M9N7;Q4KLH5	Arf-GAP domain and FG repeat-containing protein 1	Agfg1	0.398494	0.0308635	ns	0.316205	0.0216325	ns	unchanged	0.609748	-0.00522127	ns	0.0753276	0.0471812	ns	unchanged
4289	M0R7K1;F1LQV9		Lin7a	0.000790408	-0.501945	FDR1%	0.31599	0.0121355	ns	less syn	1.8384e-07	-1.18283	FDR1%	0.000714582	0.130065	FDR1%	slower turnover
1289	B0BN94	Protein FAM136A	Fam136a	0.481658	-0.159248	ns	0.000157893	-0.112351	FDR1%	more deg	0.0143003	0.34358	ns	0.453983	-0.0273393	ns	unchanged
3333	F1LN92;Q5BJM6		Afg3l2	0.284784	-0.0318578	ns	0.861682	-0.00434152	ns	unchanged	0.000666195	-0.12259	FDR1%	0.045098	-0.028614	ns	less syn
3455	F1LRP7;Q9QZ81	Protein argonaute-2	Ago2	0.791809	-0.0473669	ns	0.653571	0.0339946	ns	unchanged	0.616128	-0.023916	ns	0.0369078	-0.0293906	ns	unchanged
6630	Q6MG85	1-acyl-sn-glycerol-3-phosphate acyltransferase	Agpat1	0.035801	-0.18184	ns	0.0138319	0.128193	ns	unchanged	0.670906	-0.0675675	ns	0.719092	0.022596	ns	unchanged
6161	Q62634;Q62634-2	Vesicular glutamate transporter 1	Slc17a7	0.000310565	-0.49676	FDR1%	0.835526	-0.0169856	ns	less syn	0.00161303	0.290866	FDR1%	0.00114874	0.112368	FDR1%	more syn & less deg
3998	G3V7D4;A5HTT2		Efnb3	4.98274e-08	-0.495326	FDR1%	0.100316	0.132419	ns	less syn	0.654012	-0.140596	ns	0.430738	0.091562	ns	unchanged
6184	Q62768-2;Q62768-3;Q62768	Protein unc-13 homolog A	Unc13a	7.60735e-08	-0.493076	FDR1%	0.638581	0.0158112	ns	less syn	6.44692e-07	-0.253748	FDR1%	2.99557e-05	0.350975	FDR1%	slower turnover
658	A0A0G2K3J4;F1LNS0;P0C6C0	A-kinase anchor protein SPHKAP	Sphkap	6.24581e-06	-0.489527	FDR1%	0.154761	0.0660919	ns	less syn	NA	NA	NA	NA	NA	NA	NA
6921	Q91Y79;D3ZET9;A0A0G2K315		Cep170	7.05858e-05	-0.273295	FDR1%	0.000786136	-0.110048	FDR1%	less syn & more deg	0.577882	-0.0616973	ns	0.000882257	0.12701	FDR1%	less deg
2802	D4A2F1;F1LPF2;P25304-3;P25304-4;P25304-2;P25304-5;P25304-6;P25304	Agrin;Agrin N-terminal 110 kDa subunit;Agrin C-terminal 110 kDa subunit;Agrin C-terminal 90 kDa fragment;Agrin C-terminal 22 kDa fragment	Agrn	0.288567	0.103623	ns	0.00248578	0.165827	ns	unchanged	0.90348	0.0185142	ns	0.228658	0.00362081	ns	unchanged
4105	G3V8J5;Q9ESQ7	PH and SEC7 domain-containing protein 1	Psd	7.45658e-10	-0.488134	FDR1%	0.617713	-0.0564848	ns	less syn	2.6466e-05	0.371132	FDR1%	0.857431	0.00702603	ns	more syn
1778	B5DFN2;A0A140TAI8	Adenosylhomocysteinase	Ahcyl1	0.0201522	-0.144441	ns	0.818438	0.0644338	ns	unchanged	0.0187167	-0.127801	ns	0.45796	0.0959744	ns	unchanged
6206	Q62936;A0A096MJ42;Q62936-2;A0A0G2K0Y9;A0A096MJR5	Disks large homolog 3	Dlg3	5.03983e-33	-0.487386	FDR1%	0.692371	-0.052652	ns	less syn	0.000220678	-0.12761	FDR1%	0.702015	0.0289585	ns	less syn
3772	F1M9F9;Q6DTM3	Jouberin	Ahi1	NA	NA	NA	NA	NA	NA	NA	2.23269e-09	0.318214	FDR1%	0.17949	0.196123	ns	more syn
2111	D3ZGE6;Q66HL2;A0A0G2JZ13;A0A1B0GWS4;O70420;O70419	Src substrate cortactin	Cttn	9.54639e-05	-0.219784	FDR1%	3.67442e-05	-0.108043	FDR1%	less syn & more deg	0.000633235	-0.202091	FDR1%	0.0148475	-0.0123033	ns	less syn
3222	D4AEH9		Agl	0.973962	-0.0280792	ns	0.187745	0.0536715	ns	unchanged	0.000483275	0.142061	FDR1%	0.0604692	0.0383498	ns	more syn
1915	D3ZAI6		Nt5dc3	6.03419e-15	-0.483627	FDR1%	0.104365	0.0559438	ns	less syn	0.290142	-0.0511237	ns	0.0524294	0.0517038	ns	unchanged
826	A0A0G2K7K2;Q9JM53;Q924M6	ArfGAP with FG repeats 2	Aifm1	0.158964	-0.113911	ns	0.846731	-0.0510215	ns	unchanged	0.161885	-0.108328	ns	0.213864	-0.0890241	ns	unchanged
4899	P42260;F1M855	Glutamate receptor ionotropic, kainate 2	Grik2	9.93809e-08	-0.482895	FDR1%	0.534774	-0.0158814	ns	less syn	0.187117	-0.183631	ns	0.518455	0.0234042	ns	unchanged
3237	E1AW38;Q02294;O89089;F1LQ87;F1LRE0;Q6XS93;Q6XS92	Voltage-dependent N-type calcium channel subunit alpha-1B	Cacna1b	0.00211415	-0.31499	FDR1%	0.00136583	-0.10545	FDR1%	less syn & more deg	0.333125	0.0470377	ns	0.00013624	0.154673	FDR1%	less deg
5783	Q5FWY5	AH receptor-interacting protein	Aip	0.029369	-0.202577	ns	0.0432375	0.0925649	ns	unchanged	0.206267	-0.0322847	ns	0.18278	0.0681932	ns	unchanged
4166	G3V965		Agpat5	0.956721	-0.017828	ns	0.0872228	0.0375938	ns	unchanged	0.533558	-0.115276	ns	0.788486	0.0328192	ns	unchanged
99	A0A0G2JSG6;P29410-2;P29410	Adenylate kinase 2, mitochondrial;Adenylate kinase 2, mitochondrial, N-terminally processed	Ak2	0.455237	0.0913102	ns	0.428073	-0.0259654	ns	unchanged	0.0036635	-0.286933	ns	0.000933134	-0.0907887	FDR1%	more deg
6642	Q6P2A5;P29411	GTP:AMP phosphotransferase AK3, mitochondrial	Ak3	0.613148	-0.0361241	ns	0.492307	0.0619408	ns	unchanged	0.0455739	-0.132953	ns	0.0959727	-0.0235317	ns	unchanged
7134	Q9WUS0	Adenylate kinase 4, mitochondrial	Ak4	0.00397702	-0.40565	ns	0.556037	0.0264311	ns	unchanged	0.00130087	0.379039	FDR1%	0.0253885	0.115031	ns	more syn
4785	P23565	Alpha-internexin	Ina	0.0255795	-0.203865	ns	1.15062e-05	-0.0970013	FDR1%	more deg	0.00011927	-0.297317	FDR1%	0.820609	0.0382746	ns	less syn
6261	Q63560;Q63560-2;F1LQZ9	Microtubule-associated protein 6	Map6	0.176493	-0.0458231	ns	5.21634e-08	-0.0881595	FDR1%	more deg	2.87636e-14	-0.246158	FDR1%	3.13765e-09	0.120727	FDR1%	slower turnover
5265	Q03351-2;Q03351-3;Q03351-4;Q03351;Q68G04;Q03351-8;Q03351-7;Q03351-6;Q03351-5	NT-3 growth factor receptor	Ntrk3	1.51701e-05	-0.47266	FDR1%	0.67942	0.132685	ns	less syn	0.1557	0.114067	ns	0.693072	0.0549955	ns	unchanged
5944	Q5RK25	Phosphomannomutase	Pmm1	0.936938	-0.00680825	ns	0.00734317	0.136711	ns	unchanged	0.645723	-0.103205	ns	9.13958e-10	0.353212	FDR1%	less deg
473	A0A0G2JZV3;G3V8G1;B0BN26		Agtpbp1	0.0298884	-0.205907	ns	0.0139049	0.0774199	ns	unchanged	0.339152	-0.0439689	ns	0.0140794	0.110235	ns	unchanged
5062	P62483;A0A0G2K670	Voltage-gated potassium channel subunit beta-2	Kcnab2	9.65572e-15	-0.471665	FDR1%	0.00961626	0.135554	ns	less syn	6.81402e-09	-0.29598	FDR1%	0.376602	-0.0484319	ns	less syn
77	A0A0A0MXX1;Q6JP77-2;Q6JP77	A-kinase anchor protein 7 isoforms delta and gamma	Akap7	0.914543	-0.040661	ns	0.108478	-0.0573603	ns	unchanged	0.733879	-0.0503132	ns	0.303777	0.0184498	ns	unchanged
1278	B0BN63		Ahsa1	0.0039247	-0.207132	ns	0.00874206	0.14186	ns	unchanged	0.210068	0.109052	ns	0.00100322	0.119422	FDR1%	less deg
530	A0A1B0GWY5;A0A0G2K0V4;Q5FVC2;A0A1B0GWX6;A0A1B0GWW1	Rho guanine nucleotide exchange factor 2	Arhgef2	1.97875e-12	-0.466445	FDR1%	0.00304985	0.186967	ns	less syn	0.937153	0.0405179	ns	0.0645708	0.0308874	ns	unchanged
1400	B1WBV1		Aida	0.918362	0.0693227	ns	0.15076	0.0712807	ns	unchanged	0.767217	0.0909486	ns	0.0081974	0.210632	ns	unchanged
79	A0A0G2K3V2;A0A0A0MXY9;Q8CG45	Aflatoxin B1 aldehyde reductase member 2	Akr7a2	0.146167	0.0226535	ns	0.172604	0.129033	ns	unchanged	0.296702	0.13053	ns	0.318023	0.107165	ns	unchanged
1908	D3ZAA9;O88953		Mpp2	5.97406e-23	-0.465849	FDR1%	0.360882	0.0358214	ns	less syn	7.36189e-19	-0.396367	FDR1%	0.156775	0.0405317	ns	less syn
904	A0A0G2K9A9;D3ZT20		Fbxo41	1.83976e-05	-0.322566	FDR1%	0.00076511	-0.0824119	FDR1%	less syn & more deg	0.017703	0.088927	ns	8.4454e-11	0.223639	FDR1%	less deg
3334	F1LNB3;Q66HA0		Akap10	NA	NA	NA	NA	NA	NA	NA	0.167196	0.0663932	ns	0.448148	0.136691	ns	unchanged
4011	G3V7I5;Q66HF8	Aldehyde dehydrogenase X, mitochondrial	Aldh1b1	0.00293915	-0.185196	ns	0.309615	-0.0176579	ns	unchanged	0.0679104	-0.139797	ns	0.101595	0.0357199	ns	unchanged
4813	P28037;A0A0G2K0D8;M0R8T2	Cytosolic 10-formyltetrahydrofolate dehydrogenase;10-formyltetrahydrofolate dehydrogenase	Aldh1l1	0.360997	-0.156015	ns	0.929344	0.00944304	ns	unchanged	0.349048	-0.110942	ns	0.427589	-0.0374709	ns	unchanged
2471	D3ZTP0	10-formyltetrahydrofolate dehydrogenase	Aldh1l2	0.388496	-0.0448299	ns	0.302415	0.125826	ns	unchanged	0.0488968	-0.0768995	ns	0.897569	-0.0335601	ns	unchanged
4666	P11884	Aldehyde dehydrogenase, mitochondrial	Aldh2	0.00600093	-0.238179	ns	0.87328	0.0248955	ns	unchanged	0.263303	-0.0401288	ns	0.0152389	-0.114429	ns	unchanged
674	A0A0G2K3Y6;D3ZKL3		Cpeb4	4.9909e-07	-0.459153	FDR1%	0.836458	0.0612519	ns	less syn	0.338354	0.0220302	ns	0.640692	-0.0725187	ns	unchanged
520	Q5U306;A0A0G2K0P0		Akap8l	0.0622428	-0.315194	ns	0.184034	-0.0920363	ns	unchanged	0.0434361	-0.313265	ns	0.801711	0.189542	ns	unchanged
2134	D3ZH75		Akt1s1	0.367042	-0.0829846	ns	0.60424	0.0962467	ns	unchanged	0.77113	-0.0831696	ns	0.21236	0.150296	ns	unchanged
4014	G3V7J0;Q02253	Methylmalonate-semialdehyde dehydrogenase [acylating], mitochondrial	Aldh6a1	0.0785187	-0.0920099	ns	0.661428	-0.0225359	ns	unchanged	0.0146642	-0.12268	ns	5.50143e-07	-0.106735	FDR1%	more deg
6298	Q64057	Alpha-aminoadipic semialdehyde dehydrogenase	Aldh7a1	0.0381069	-0.0722999	ns	0.449577	0.0193357	ns	unchanged	0.0213213	-0.11626	ns	0.0880821	-0.0258209	ns	unchanged
105	A0A0G2JSI1;Q9JLJ3	4F2 cell-surface antigen heavy chain	Aldh9a1	0.977386	-0.047467	ns	0.0638624	0.0570094	ns	unchanged	0.0531999	0.112685	ns	0.0706913	0.0438928	ns	unchanged
4415	O35115	Four and a half LIM domains protein 2	Fhl2	0.000170499	-0.458982	FDR1%	0.708694	-0.00783976	ns	less syn	0.000566207	-0.519694	FDR1%	0.0130731	-0.160738	ns	less syn
1136	A0A140UHX6;Q6XDA0		Sptb	2.03525e-08	-0.45507	FDR1%	0.00717142	-0.156403	ns	less syn	0.00335303	0.165228	ns	0.0384476	0.144551	ns	unchanged
2944	D4A6H8		Ctnna2	7.38239e-05	-0.247045	FDR1%	3.76697e-06	-0.0811037	FDR1%	less syn & more deg	0.000435374	-0.187115	FDR1%	0.36219	0.0396104	ns	less syn
7065	Q9JLD2	Neuroserpin	Serpini1	0.31174	0.0310328	ns	0.0159419	0.242923	ns	unchanged	3.30254e-10	-0.662456	FDR1%	0.648717	-0.1349	ns	less syn
1645	B4F768;A0A0G2JVM0		Aldh4a1	0.348003	-0.116601	ns	0.851683	0.0591184	ns	unchanged	0.955806	0.0297003	ns	0.0914086	-0.0377793	ns	unchanged
1989	D3ZCQ2		Alg11	0.113456	-0.0882769	ns	0.0545777	0.092537	ns	unchanged	0.633636	0.0230675	ns	0.101214	0.111325	ns	unchanged
6843	Q80ZD7	Amphoterin-induced protein 1	Amigo1	0.0691469	-0.246042	ns	0.0453549	0.374737	ns	unchanged	0.156616	-0.0450266	ns	0.00644455	0.725182	ns	unchanged
4433	O35458	Vesicular inhibitory amino acid transporter	Slc32a1	0.00912168	-0.104121	ns	0.00179055	-0.0620935	FDR1%	more deg	6.40314e-21	-0.463143	FDR1%	0.125235	0.0344383	ns	less syn
3722	F1M7Q5;O09178	AMP deaminase 3	Ampd3	0.00319417	0.359716	ns	0.870768	-0.0269654	ns	unchanged	NA	NA	NA	NA	NA	NA	NA
4405	O08838;A0A0G2K5Z4	Amphiphysin	Amph	0.273863	-0.325366	ns	0.0639613	-0.0384414	ns	unchanged	0.530815	0.0534116	ns	0.0929621	0.088314	ns	unchanged
6083	Q5XI85;M0R9I6	Aminomethyltransferase	Amt	0.309695	-0.0182167	ns	0.87716	0.0168323	ns	unchanged	0.814406	-0.0485605	ns	0.964628	0.00408573	ns	unchanged
3787	F1MA36;Q9QWN8	Spectrin beta chain, non-erythrocytic 2	Sptbn2	2.89459e-117	-0.500384	FDR1%	0.000126065	-0.0589946	FDR1%	less syn & more deg	4.75832e-18	-0.143113	FDR1%	3.51787e-07	0.0716121	FDR1%	slower turnover
5545	Q4QQS6		Alg5	0.61494	-0.125316	ns	0.871499	-0.0324226	ns	unchanged	0.222167	0.0304446	ns	0.643197	-0.0988384	ns	unchanged
4976	P54313;Q45QL6;Q91XL4	Guanine nucleotide-binding protein G(I)/G(S)/G(T) subunit beta-2	Gnb2	2.07867e-05	-0.190518	FDR1%	0.00101489	-0.047542	FDR1%	less syn & more deg	0.107726	-0.0758041	ns	9.83772e-16	0.136515	FDR1%	less deg
2621	D3ZXH7		Alyref	0.103954	-0.109796	ns	0.106114	-0.138627	ns	unchanged	0.0830463	-0.0956149	ns	0.637273	0.0366703	ns	unchanged
3734	F1M801		Anapc1	0.156963	-0.128114	ns	0.00420313	0.127524	ns	unchanged	0.0122517	0.113547	ns	0.0313832	0.100716	ns	unchanged
2183	D3ZIT4		Anapc7	0.00732249	-0.250833	ns	0.12543	0.2501	ns	unchanged	0.525406	0.0608429	ns	0.161718	0.0668462	ns	unchanged
1897	D3Z9Z0		Ank1	0.0388612	-0.158624	ns	0.332184	0.0546888	ns	unchanged	0.000680522	-0.284642	FDR1%	0.916399	-0.0089336	ns	less syn
6776	Q76K24	Ankyrin repeat domain-containing protein 46	Ankrd46	0.0442274	-0.178996	ns	0.783676	0.299426	ns	unchanged	0.989738	-0.0248013	ns	0.152202	-0.197536	ns	unchanged
7177	Q9Z2I6	Synaptic vesicle glycoprotein 2C	Sv2c	0.808483	0.0359487	ns	0.0248027	0.0542603	ns	unchanged	0.000239749	-0.65131	FDR1%	0.544881	0.0916623	ns	less syn
7171	Q9Z252	Protein lin-7 homolog B	Lin7b	0.00128462	-0.446833	FDR1%	0.68092	-0.0685107	ns	less syn	0.0759257	-0.416407	ns	0.856561	0.0723443	ns	unchanged
7016	Q9EST6;F1LP34	Acidic leucine-rich nuclear phosphoprotein 32 family member B	Anp32b	0.975867	-0.0824565	ns	0.0026012	0.322737	ns	unchanged	0.0296629	0.227609	ns	0.00653291	0.155908	ns	unchanged
4984	Q62861;P54900	Sodium channel subunit beta-2	Scn2b	7.87889e-10	-0.444816	FDR1%	0.474343	0.160379	ns	less syn	0.0472253	-0.109871	ns	0.0843252	0.145659	ns	unchanged
6884	Q8K4Y5	Leucine-rich glioma-inactivated protein 1	Lgi1	4.58499e-15	-0.441308	FDR1%	0.0194438	0.0712253	ns	less syn	5.53214e-31	-0.83613	FDR1%	0.705497	0.008556	ns	less syn
5292	Q07936;Q07936-2	Annexin A2	Anxa2	0.101771	0.256185	ns	0.821504	-0.0423006	ns	unchanged	NA	NA	NA	NA	NA	NA	NA
4701	Q66HH8;P14668;O70371	Annexin;Annexin A5	Anxa5	0.00433005	-0.285076	ns	0.491164	0.0318784	ns	unchanged	0.00456844	-0.440537	ns	0.968332	0.132571	ns	unchanged
5795	Q5HZW3	Aspartate beta-hydroxylase domain-containing protein 2	Asphd2	5.87301e-08	-0.441033	FDR1%	0.0320005	0.0986393	ns	less syn	0.731774	0.0761449	ns	0.0682147	-0.0987013	ns	unchanged
5581	Q4V7D9		Smpdl3b	2.05643e-05	-0.440726	FDR1%	0.0132409	0.150167	ns	less syn	5.99472e-13	0.810838	FDR1%	5.36099e-07	0.201137	FDR1%	more syn & less deg
6833	Q80W98	Small glutamine-rich tetratricopeptide repeat-containing protein beta	Sgtb	0.840056	-0.0269542	ns	0.0506688	0.141958	ns	unchanged	7.08281e-10	-0.648196	FDR1%	0.313395	0.0385222	ns	less syn
2767	D4A1J6		Ankfy1	0.122684	-0.0775755	ns	0.84086	0.0450291	ns	unchanged	0.696133	0.042812	ns	0.316616	0.0630225	ns	unchanged
5369	Q32Q06	AP-1 complex subunit mu-1	Ap1m1	0.0313771	-0.139049	ns	0.385454	-0.00260375	ns	unchanged	0.923417	-0.0181169	ns	0.0367665	0.0587205	ns	unchanged
878	A0A0G2K8N6;D3ZC34		Ankmy2	0.492935	-0.126169	ns	0.110853	0.130923	ns	unchanged	0.195284	-0.0898446	ns	0.202328	0.0771572	ns	unchanged
2059	F1LQL1;D3ZEW7;P29476;P29476-3;P29476-2	Nitric oxide synthase;Nitric oxide synthase, brain	Nos1	0.0121845	-0.077453	ns	0.618647	0.00437161	ns	unchanged	2.30521e-19	0.907924	FDR1%	0.000920233	0.210227	FDR1%	more syn & less deg
2506	D3ZUJ7		Ankrd13d	0.0422087	-0.285975	ns	0.353685	0.00221151	ns	unchanged	0.863083	-0.00392057	ns	0.0108644	0.182982	ns	unchanged
3665	F1M400		Ankrd28	0.942316	-0.0153783	ns	0.253032	0.127839	ns	unchanged	0.718856	0.0441189	ns	0.982256	-0.0209862	ns	unchanged
475	A0A0G2JZX5;A0A0G2KAA0	Submitted name: IQ motif and Sec7 domain 2	Iqsec2	2.90819e-06	-0.437294	FDR1%	0.163821	0.0775177	ns	less syn	0.00547167	0.280943	ns	0.0219389	0.180474	ns	unchanged
1091	B5DFG5;A0A0U1RRT8;A0A0U1RRW2;A0A0U1RRQ5;A0A0U1RS01		Sept6	0.0421035	-0.254726	ns	0.00196041	-0.0472664	FDR1%	more deg	0.237645	-0.0839859	ns	6.98659e-13	0.137011	FDR1%	less deg
7023	Q9JHU0;Q9JMG8;A0A0G2K8Y5	Dihydropyrimidinase-related protein 5	Dpysl5	0.376738	-0.00705049	ns	1.31059e-06	-0.0338987	FDR1%	more deg	0.000307022	0.174233	FDR1%	5.12047e-70	0.216921	FDR1%	more syn & less deg
154	A0A0G2JT63;D3ZX82		Cyfip2	1.34028e-10	-0.432969	FDR1%	0.00981624	0.0743491	ns	less syn	0.439725	-0.0620963	ns	0.000926411	0.0994625	FDR1%	less deg
4213	H2BF30;Q920R3	Fatty acid desaturase 1	Fads1	8.11518e-09	-0.432746	FDR1%	0.49998	0.0846367	ns	less syn	0.0164888	-0.149031	ns	0.0110589	-0.213752	ns	unchanged
4969	Q6IRG9;P53676	AP-3 complex subunit mu-1	Ap3m1	0.493178	-0.0593663	ns	0.00659704	0.115536	ns	unchanged	0.251326	-0.0942953	ns	0.0282359	0.0870602	ns	unchanged
4970	P53678;V9GZ82	AP-3 complex subunit mu-2	Ap3m2	0.0134019	-0.16297	ns	0.440538	0.0340062	ns	unchanged	0.954819	0.0327284	ns	0.129902	0.0698569	ns	unchanged
6663	Q6P6V0	Glucose-6-phosphate isomerase	Gpi	1.14899e-08	-0.236985	FDR1%	0.00215511	0.0411408	FDR1%	slower turnover	0.970741	-0.0415154	ns	8.70135e-17	0.194623	FDR1%	less deg
3678	F1M4N6		Dock3	0.000228406	-0.430464	FDR1%	0.163832	0.346527	ns	less syn	0.00278291	-0.160247	ns	0.932329	0.0277239	ns	unchanged
3624	F1M0Z3;H1UBM8		Cpne4	5.77929e-16	-0.430084	FDR1%	0.00337643	0.0891051	ns	less syn	0.248211	0.111846	ns	0.00288583	0.0929815	ns	unchanged
6391	Q66HM2		Ap2a2	0.378213	-0.123491	ns	0.442096	0.0577082	ns	unchanged	0.96809	0.0354166	ns	0.319045	0.136419	ns	unchanged
2015	D3ZDJ3		Elmod1	0.000107437	-0.429807	FDR1%	0.717846	0.105728	ns	less syn	0.0021544	-0.25324	FDR1%	0.165244	-0.0315825	ns	less syn
4903	P43138;Q99PF3	DNA-(apurinic or apyrimidinic site) lyase;DNA-(apurinic or apyrimidinic site) lyase, mitochondrial	Apex1	0.96583	-0.0453589	ns	0.004138	0.255147	ns	unchanged	0.248428	-0.0391905	ns	0.377934	0.024567	ns	unchanged
1855	D3Z8D8		Slitrk1	9.34388e-06	-0.42654	FDR1%	0.0769673	0.126568	ns	less syn	1.42503e-08	-0.781633	FDR1%	0.00315179	-0.262967	ns	less syn
1596	B2RZ62;G3V9Y9		Ap3s1	0.00623262	-0.217181	ns	0.48253	0.0620329	ns	unchanged	0.188947	-0.153317	ns	0.353967	0.0682646	ns	unchanged
1430	B1WC49		Api5	0.0440749	-0.101386	ns	0.193717	0.0624622	ns	unchanged	0.00450677	-0.100485	ns	0.42056	-0.0409022	ns	unchanged
1335	B0BNM1	NAD(P)H-hydrate epimerase	Apoa1bp	0.543141	-0.0700228	ns	0.901689	0.0292505	ns	unchanged	0.478256	-0.0657552	ns	0.105341	0.0648765	ns	unchanged
2503	D3ZUI1		Apip	0.00427006	-0.236869	ns	0.396766	-0.0560986	ns	unchanged	0.025393	0.252741	ns	0.0188813	0.107574	ns	unchanged
4287	M0R7G4;M0R7V3		Apoo	0.00373678	-0.223066	ns	0.54103	-0.0305449	ns	unchanged	0.0778313	-0.121294	ns	0.288294	-0.0215717	ns	unchanged
5965	Q5U1W6		Apool	0.946807	0.00836381	ns	0.389561	0.0115973	ns	unchanged	0.272715	-0.16616	ns	0.575856	0.0157801	ns	unchanged
2569	D3ZWA8		Appl1	0.0070785	-0.153683	ns	0.0251872	0.0598227	ns	unchanged	0.403117	-0.045963	ns	0.460733	0.0446222	ns	unchanged
1652	B4F779		Appl2	0.349147	-0.0357499	ns	0.807734	0.0281392	ns	unchanged	0.00325886	0.172054	ns	0.0596834	0.147642	ns	unchanged
7179	Q9Z2L0	Voltage-dependent anion-selective channel protein 1	Vdac1	4.93219e-07	-0.229414	FDR1%	0.000138386	0.0441731	FDR1%	slower turnover	0.196017	-0.0359622	ns	0.000372443	0.0435595	FDR1%	less deg
3424	F1LQY6		Necab2	1.76609e-07	-0.426506	FDR1%	0.477948	0.0196441	ns	less syn	0.0166709	-0.201708	ns	0.0014859	0.109213	FDR1%	less deg
5186	P84082	ADP-ribosylation factor 2	Arf2	NA	NA	NA	NA	NA	NA	NA	0.581436	-0.256561	ns	0.00982562	0.244935	ns	unchanged
6846	Q810W7-2;Q810W7	Microtubule-associated serine/threonine-protein kinase 1	Mast1	1.04474e-11	-0.425647	FDR1%	0.206133	-0.0731675	ns	less syn	1.23947e-10	0.504607	FDR1%	8.37112e-05	0.35155	FDR1%	more syn & less deg
5187	P84083	ADP-ribosylation factor 5	Arf5	0.0395833	-0.262628	ns	0.0146223	0.168831	ns	unchanged	0.0197422	-0.132176	ns	0.0405299	0.128757	ns	unchanged
5061	P62332	ADP-ribosylation factor 6	Arf6	0.662507	-0.029871	ns	0.100457	0.0631446	ns	unchanged	0.987879	0.0284016	ns	0.0276746	0.132457	ns	unchanged
5419	Q3S4A4;Q3S4A5;Q62848-2;Q62848;Q62848-3;Q6IRJ8	ADP-ribosylation factor GTPase-activating protein 1	Arfgap1	0.00934023	-0.21003	ns	0.3314	-0.0492827	ns	unchanged	0.880743	0.0239987	ns	0.823083	0.0443827	ns	unchanged
5411	Q3MID3	ADP-ribosylation factor GTPase-activating protein 2	Arfgap2	0.387656	-0.00944726	ns	0.00961419	0.158831	ns	unchanged	0.170136	-0.0908752	ns	0.304048	0.0368798	ns	unchanged
2932	D4A631	Brefeldin A-inhibited guanine nucleotide-exchange protein 1	Arfgef1	0.457596	-0.145203	ns	0.0188214	0.0854287	ns	unchanged	0.127192	0.130002	ns	0.167843	0.127008	ns	unchanged
6825	Q7TSU1	Brefeldin A-inhibited guanine nucleotide-exchange protein 2	Arfgef2	0.6219	-0.133468	ns	0.438674	0.0473069	ns	unchanged	0.736692	0.0845531	ns	0.466759	0.0628229	ns	unchanged
2600	D3ZWV8		Tiam1	0.000458829	-0.42513	FDR1%	0.0149775	0.16444	ns	less syn	0.000775811	-0.314002	FDR1%	0.659061	0.000938465	ns	less syn
399	A0A0G2JYA2;Q9JHU5	Arfaptin-1	Arfip1	0.796375	0.0455861	ns	0.681732	0.00837922	ns	unchanged	0.000171446	0.181736	FDR1%	0.612621	0.0458462	ns	more syn
2037	D3ZE85	DOMON domain-containing protein FRRS1L	Frrs1l	8.80227e-05	-0.424116	FDR1%	0.0287385	0.214035	ns	less syn	3.19281e-05	0.368062	FDR1%	0.807243	0.100084	ns	more syn
3712	F1M779;P11442	Clathrin heavy chain;Clathrin heavy chain 1	Cltc	1.71634e-06	-0.104377	FDR1%	4.46294e-07	0.0460945	FDR1%	slower turnover	1.82991e-59	-0.375688	FDR1%	0.00501802	0.0476268	ns	less syn
4008	G3V7H6;O08701	Arginase;Arginase-2, mitochondrial	Arg2	0.779453	-0.0178205	ns	0.988801	0.0247162	ns	unchanged	0.0861632	0.122148	ns	0.287252	0.0515129	ns	unchanged
2938	D4A6C5		Arhgap1	0.00742496	-0.230079	ns	0.0135045	0.0797143	ns	unchanged	0.225354	-0.179534	ns	0.01044	0.0745057	ns	unchanged
7064	Q9JLA3	UDP-glucose:glycoprotein glucosyltransferase 1	Uggt1	0.00550592	-0.110749	ns	0.000115184	0.0469703	FDR1%	less deg	0.0312826	-0.11056	ns	0.448373	-0.0494946	ns	unchanged
5164	P70587-2;F1M4K6;P70587-3;P70587;P70587-5;P70587-4;A0A0A0MXW8;F1LMG7;B8Q4H4;B8Q4H5;B8Q4H3;B8Q4F8;B8Q4G6;B8Q4H0;B8Q4G8;B8Q4G3;B8Q4G4;B8Q4G9;B8Q4G5;B8Q4G2;B8Q4F9;B8Q4H1;B8Q4G1;B8Q4G0;B8Q4H2;B8Q4G7	Leucine-rich repeat-containing protein 7	Lrrc7	5.67963e-23	-0.418593	FDR1%	0.0304892	-0.0995389	ns	less syn	3.299e-05	-0.123097	FDR1%	0.639697	-0.00935423	ns	less syn
4571	P06685;Q64608	Sodium/potassium-transporting ATPase subunit alpha-1	Atp1a1	1.03434e-28	-0.418219	FDR1%	0.0224727	0.0398026	ns	less syn	2.3912e-36	-0.393033	FDR1%	0.770171	-0.0110663	ns	less syn
5700	Q5BJU7	Wiskott-Aldrich syndrome protein family member 1	Wasf1	3.07109e-11	-0.417379	FDR1%	0.0305857	0.0859244	ns	less syn	0.187959	-0.0924719	ns	0.0757787	0.0785399	ns	unchanged
3644	F1M2D4		Arhgap23	0.225912	-0.0918602	ns	0.22622	0.0422613	ns	unchanged	0.157765	-0.174035	ns	0.00111941	0.157158	FDR1%	less deg
3253	E9PT66;B5DF12		Sf3b3	4.63844e-06	-0.155824	FDR1%	0.00177555	0.0549734	FDR1%	slower turnover	0.592458	-0.000715079	ns	3.28706e-05	-0.126006	FDR1%	more deg
5280	Q05BA4;Q6VBQ5	Myeloid-associated differentiation marker	Myadm	0.197409	-0.114369	ns	0.01424	0.123803	ns	unchanged	4.46014e-06	-0.635946	FDR1%	0.12713	0.0659503	ns	less syn
4709	P15431	Gamma-aminobutyric acid receptor subunit beta-1	Gabrb1	0.000159342	-0.416784	FDR1%	0.00448982	0.18464	ns	less syn	3.17959e-09	-0.531978	FDR1%	0.13508	-0.203731	ns	less syn
1168	A0JN25	Microtubule-associated protein	Mapt	0.182235	-0.0571721	ns	0.206251	-0.134254	ns	unchanged	0.221471	0.125143	ns	8.84864e-06	0.310447	FDR1%	less deg
1040	A0A0H2UHM5;P11598	Protein disulfide-isomerase A3	Pdia3	0.00264795	-0.0537799	FDR1%	0.000406504	0.0550123	FDR1%	slower turnover	8.0342e-06	-0.147546	FDR1%	0.000295615	-0.10397	FDR1%	less syn & more deg
3809	F1MAK3;B5DEI5		Arhgap32;Rics	0.00924947	-0.197822	ns	0.047417	0.0646184	ns	unchanged	0.132165	0.0805896	ns	0.712867	0.0457822	ns	unchanged
835	A0A0G2K7N9;Q6TUE6		Arhgap5	0.0350901	-0.121572	ns	0.0110131	0.139653	ns	unchanged	0.410416	-0.0384494	ns	0.576014	0.0640984	ns	unchanged
6925	Q91ZN1	Coronin-1A	Coro1a	2.77912e-09	-0.415275	FDR1%	0.167474	0.0229942	ns	less syn	5.70738e-09	-0.399409	FDR1%	0.000440111	0.0690124	FDR1%	slower turnover
1005	A0A0G2QC21;A3KMH4		Arhgef7	0.0855532	-0.0762428	ns	0.00549161	0.10645	ns	unchanged	0.00352707	0.159834	ns	0.00654994	0.132664	ns	unchanged
2825	D4A3E3		Arid1a	0.348128	-0.215632	ns	0.461454	0.206599	ns	unchanged	0.735945	-0.0199928	ns	0.35663	0.0940545	ns	unchanged
5030	P61212	ADP-ribosylation factor-like protein 1	Arl1	0.0826924	-0.00771439	ns	0.00397445	0.322882	ns	unchanged	0.214846	-0.10713	ns	0.679654	-0.0515772	ns	unchanged
2627	D3ZXL1;Q5XI15		Arih1	0.609654	-0.152251	ns	0.316828	0.240752	ns	unchanged	0.462043	0.0537894	ns	0.20102	0.0588988	ns	unchanged
6586	Q6IMA8		Arl10	0.912379	-0.186033	ns	0.130366	-0.0034807	ns	unchanged	0.945036	0.00308934	ns	0.752311	-0.00030344	ns	unchanged
4138	G3V8V0;O08697;A0A1B0GWW8	ADP-ribosylation factor-like protein 2	Arl2	0.681281	-0.0755796	ns	0.0980186	0.156187	ns	unchanged	0.0315069	-0.199898	ns	0.581709	0.1	ns	unchanged
5604	Q4V8C5-2;Q4V8C5;A0A0G2K5P6	ADP-ribosylation factor-like protein 2-binding protein	Arl2bp	0.618752	-0.118345	ns	0.321928	0.394287	ns	unchanged	0.73422	0.136331	ns	0.342912	-0.00971218	ns	unchanged
6335	Q64548-2	Reticulon-1	Rtn1	4.65406e-10	-0.414243	FDR1%	0.135489	0.159282	ns	less syn	0.663517	-0.0280144	ns	0.164227	0.234658	ns	unchanged
4960	P52481	Adenylyl cyclase-associated protein 2	Cap2	4.94242e-38	-0.581955	FDR1%	0.000592403	0.0562094	FDR1%	slower turnover	2.89207e-52	-0.843947	FDR1%	0.868546	0.00608106	ns	less syn
6048	Q5XHZ0	Heat shock protein 75 kDa, mitochondrial	Trap1	0.00140808	-0.113129	FDR1%	0.00114085	0.0583549	FDR1%	slower turnover	8.04997e-07	-0.177642	FDR1%	0.736906	-0.0341019	ns	less syn
5172	P81155	Voltage-dependent anion-selective channel protein 2	Vdac2	0.00211172	-0.183724	FDR1%	0.00227143	0.0589414	FDR1%	slower turnover	0.192013	-0.0596965	ns	0.0622311	0.0303943	ns	unchanged
3117	D4ABN3;Q62910-2;Q62910;Q62910-5;Q62910-4;Q62910-3;Q62910-6;F1LZU2	Synaptojanin-1	Synj1;4933427I04Rik	3.07841e-26	-0.462775	FDR1%	9.22673e-06	0.0632398	FDR1%	slower turnover	7.63187e-07	0.191003	FDR1%	0.000129514	0.107927	FDR1%	more syn & less deg
6372	Q66HA6	ADP-ribosylation factor-like protein 8B	Arl8b	0.0507357	-0.153552	ns	0.00301137	0.144587	ns	unchanged	0.726203	0.0224144	ns	0.0842392	0.0931475	ns	unchanged
3697	F1M6C4;M0RB29		Arl15	0.23673	-0.12269	ns	0.238098	0.0563822	ns	unchanged	0.126083	0.230115	ns	0.216404	0.117902	ns	unchanged
4896	P41562;Q0QER8;A0A1L1WKG3	Isocitrate dehydrogenase [NADP] cytoplasmic	Idh1	0.00496257	-0.157042	ns	7.64734e-06	0.0638744	FDR1%	less deg	0.0528491	-0.0849893	ns	1.82688e-29	0.196053	FDR1%	less deg
3330	F1LN69;A0A0G2JV77;A0A0G2K382;F1LP90;Q5EB61;Q3SYQ1	Misshapen-like kinase 1	Mink1;LOC303259	2.57734e-09	-0.40902	FDR1%	0.1559	0.0658194	ns	less syn	0.320615	-0.101712	ns	0.00169612	0.129936	ns	unchanged
2760	D4A1D3		Sacs	0.000101736	-0.408779	FDR1%	0.10043	0.172065	ns	less syn	0.616207	0.0538953	ns	0.310935	-0.060248	ns	unchanged
5207	P97536	Cullin-associated NEDD8-dissociated protein 1	Cand1	2.74799e-05	-0.137619	FDR1%	5.74904e-05	0.0672729	FDR1%	slower turnover	0.0127435	0.0611431	ns	6.62352e-09	0.151402	FDR1%	less deg
6558	Q6AYT5;A0A1B0GWT0	Protein-glutamate O-methyltransferase	Armt1	0.0416894	-0.173319	ns	0.0380688	0.151106	ns	unchanged	0.475149	0.0196324	ns	0.0789223	0.141863	ns	unchanged
6975	Q99PD4;D3ZXP7;Q6PCU9;A0A096MJQ1	Actin-related protein 2/3 complex subunit 1A	Arpc1a	0.00864738	-0.251351	ns	0.224427	0.0378715	ns	unchanged	0.346734	-0.0904908	ns	0.397919	0.0393617	ns	unchanged
5921	Q5RJK6		Inpp1	6.72152e-08	-0.408064	FDR1%	0.628964	-0.000338085	ns	less syn	0.109849	0.110568	ns	1.49745e-05	0.169951	FDR1%	less deg
1484	B2GV73	Actin-related protein 2/3 complex subunit 3	Arpc3	0.187872	-0.183192	ns	0.038273	0.0522255	ns	unchanged	0.858373	-0.0731295	ns	0.00532569	0.0724132	ns	unchanged
2858	D4A435		Icam5	1.89222e-19	-0.406554	FDR1%	0.0851149	-0.0964731	ns	less syn	0.8649	0.00833024	ns	0.0532893	0.0715717	ns	unchanged
5507	Q4KLF8;A0A0G2K585;A0A0U1RRQ2	Actin-related protein 2/3 complex subunit 5	Arpc5	0.0193983	-0.297698	ns	0.119678	0.0644184	ns	unchanged	0.379539	-0.12172	ns	0.065147	0.0931885	ns	unchanged
3726	F1M7V4;D3Z9C7		Pclo	8.48367e-07	-0.406231	FDR1%	0.0455177	-0.102344	ns	less syn	4.88207e-06	-0.254175	FDR1%	0.389239	0.0567242	ns	less syn
3420	Q6P790;F1LQS3;P21533;A0A0G2KBA1	60S ribosomal protein L6	Rpl6	0.222046	0.0260654	ns	0.000800744	0.0689427	FDR1%	less deg	0.56764	-0.0357995	ns	0.0020627	-0.107836	ns	unchanged
1536	B2RYL4		Armc6	0.209121	-0.0757598	ns	0.0529845	0.2349	ns	unchanged	1.09127e-05	0.356922	FDR1%	5.55232e-05	0.204276	FDR1%	more syn & less deg
1959	D3ZBU7		RGD1310819	2.50452e-16	-0.406055	FDR1%	0.481728	0.00843034	ns	less syn	3.69387e-22	-0.49909	FDR1%	0.00369783	-0.0983294	ns	less syn
4910	P46933-2;P46933;A0A0G2K3S1	Amyloid beta A4 precursor protein-binding family B member 1	Apbb1	4.2709e-08	-0.404894	FDR1%	0.285803	0.0704176	ns	less syn	2.10609e-05	-0.246313	FDR1%	0.372721	-0.120149	ns	less syn
7185	Q9Z2X5;Q6IRH2	Homer protein homolog 3	Homer3	2.62287e-08	-0.404612	FDR1%	0.202862	-0.051995	ns	less syn	5.79007e-34	1.0963	FDR1%	0.000271207	0.484706	FDR1%	more syn & less deg
348	A0A0G2JX76;Q1AAU6;A0A0G2K451;Q1AAU6-2;A0A0G2JZQ0;Q1AAU6-3	Arf-GAP with SH3 domain, ANK repeat and PH domain-containing protein 1	Asap1	0.32162	-0.0872148	ns	0.960038	-0.00327121	ns	unchanged	0.70742	0.0983734	ns	0.984378	0.0329429	ns	unchanged
3700	F1M6I9		Celf4	2.50248e-05	-0.40358	FDR1%	0.168102	0.163992	ns	less syn	0.37465	-0.00207354	ns	0.159236	-0.139917	ns	unchanged
6906	Q8VGC3;A0A0G2JSZ0;D3ZWK0;Q8VGC3-2;Q8VGC3-5;Q8VGC3-4;Q8VGC3-3	Voltage-dependent L-type calcium channel subunit beta-2	Cacnb2	0.000135764	-0.40275	FDR1%	0.0442673	0.0497041	ns	less syn	0.559905	-0.0709924	ns	0.135677	0.154076	ns	unchanged
5362	Q3KR80;Q32KK2		Arsa	0.455782	0.173399	ns	0.107018	0.0876982	ns	unchanged	0.0452974	0.230003	ns	0.00615507	0.265137	ns	unchanged
923	A0A0G2K9J2;Q5XIL1;E9PTI1		Atp6v1h	7.62574e-11	-0.23849	FDR1%	3.1117e-05	0.069701	FDR1%	slower turnover	0.0165944	-0.0618029	ns	2.86511e-06	0.0992543	FDR1%	less deg
6721	Q6RJR6	Reticulon-3	Rtn3	5.87516e-21	-0.400517	FDR1%	0.161947	-0.0471896	ns	less syn	0.413125	-0.0135357	ns	0.0134234	0.14105	ns	unchanged
2479	D3ZTV7;A0A0G2JT90		Ash2l	0.255968	-0.0481182	ns	0.566987	0.0813548	ns	unchanged	0.876518	0.0670438	ns	0.55744	-0.0821752	ns	unchanged
3077	D4AA35		Asmtl	0.798721	-0.155803	ns	0.0141191	0.170419	ns	unchanged	NA	NA	NA	NA	NA	NA	NA
603	A0A0G2K2B5;A0A096MJA9;A0A096MKE0		Asph	0.806019	-0.0711803	ns	0.372599	0.119163	ns	unchanged	0.00415717	-0.272626	ns	0.0101545	-0.223876	ns	unchanged
4989	P55161;F1LSM5;Q32PY0;Q562B3	Nck-associated protein 1	Nckap1	1.29843e-21	-0.354061	FDR1%	3.48999e-05	0.0698364	FDR1%	slower turnover	0.0145691	-0.0932246	ns	0.000373421	0.0673277	FDR1%	less deg
7297	W0T3G7;D4A4L4		Map7d2	4.72788e-07	-0.399444	FDR1%	0.777208	-0.0346886	ns	less syn	0.14721	-0.0233092	ns	0.0489665	0.158937	ns	unchanged
5400	Q3KRE0	ATPase family AAA domain-containing protein 3	Atad3	0.831264	-0.0489016	ns	0.961726	0.00502583	ns	unchanged	0.0191908	-0.204305	ns	0.554043	-0.0191776	ns	unchanged
4746_m	P19491;P19491-2;P19491-3;G3V914;F1LNE4	Glutamate receptor 2	Gria2	1.84535e-51	-0.506947	FDR1%	0.00139469	0.0729707	FDR1%	slower turnover	6.71542e-06	-0.113752	FDR1%	0.0603305	0.0449833	ns	less syn
3972	G3V714;P27682	Neuroendocrine protein 7B2;N-terminal peptide;C-terminal peptide	Scg5	0.00490465	-0.224264	ns	0.117204	0.00115386	ns	unchanged	4.39781e-10	0.697086	FDR1%	3.72633e-14	0.778261	FDR1%	more syn & less deg
2810	D4A2N1;A0A0G2JX45	Arginyl-tRNA--protein transferase 1	Ate1	0.151474	-0.219861	ns	0.0765544	0.249318	ns	unchanged	NA	NA	NA	NA	NA	NA	NA
4042	G3V7T8;P97838-2;P97838	Disks large-associated protein 3	Dlgap3	2.22289e-06	-0.397845	FDR1%	0.40683	-0.0331461	ns	less syn	0.627028	-0.0527537	ns	5.94647e-12	0.422554	FDR1%	less deg
6566	Q6AZ50	Ubiquitin-like-conjugating enzyme ATG3	Atg3	0.0455143	-0.0974083	ns	0.851911	0.059437	ns	unchanged	0.124161	-0.0522091	ns	0.792485	0.0906897	ns	unchanged
4842	P32089	Tricarboxylate transport protein, mitochondrial	Slc25a1	0.186459	-0.115421	ns	0.626815	0.0351522	ns	unchanged	1.85238e-10	-0.619893	FDR1%	0.694789	-0.0161148	ns	less syn
5782	Q5FWU3	Autophagy-related protein 9A	Atg9a	0.00534041	-0.217414	ns	0.00424767	0.188075	ns	unchanged	0.629748	-0.0460642	ns	0.127939	-0.0768932	ns	unchanged
3435	F1LR71;A0A0G2JWF4;B1WC71		Aspscr1	0.416847	-0.0996285	ns	0.25738	0.0633647	ns	unchanged	0.0666942	-0.189754	ns	0.289935	0.0759681	ns	unchanged
5125	P63142	Potassium voltage-gated channel subfamily A member 2	Kcna2	0.00141134	-0.397071	FDR1%	0.355255	0.0235176	ns	less syn	0.0845618	-0.241819	ns	0.890718	0.0198454	ns	unchanged
3410	F1LQI2;A0A0G2JW21;O55005	Roundabout homolog 1	Robo1	1.00335e-10	-0.395287	FDR1%	0.327948	-0.0859722	ns	less syn	0.0045122	0.276081	ns	0.343539	0.152661	ns	unchanged
139	A0A0G2JSS9;Q0ZHH6-2;Q0ZHH6	Atlastin-3	Atl3	0.935925	-0.0305665	ns	0.0265572	0.142887	ns	unchanged	0.609613	-0.0314082	ns	0.574873	-0.0201704	ns	unchanged
6416	Q68FS2	COP9 signalosome complex subunit 4	Cops4	0.00465343	-0.159342	ns	0.000666363	0.0743341	FDR1%	less deg	0.226188	-0.0642204	ns	2.64593e-06	0.113161	FDR1%	less deg
3313	F1LMR7;P46101-2;P46101	Dipeptidyl aminopeptidase-like protein 6	Dpp6	4.74396e-12	-0.353504	FDR1%	2.75348e-05	0.0747048	FDR1%	slower turnover	0.110323	-0.0599733	ns	0.000279287	0.107738	FDR1%	less deg
1071	X1WI37;A0A0H2UHX3;P62703	40S ribosomal protein S4, X isoform	LOC100362640;Rps4x	0.571063	-0.0113965	ns	1.64328e-05	0.0764452	FDR1%	less deg	0.131114	-0.113084	ns	0.001002	-0.21892	FDR1%	more deg
4572	P06686	Sodium/potassium-transporting ATPase subunit alpha-2	Atp1a2	0.254672	-0.0206611	ns	0.896296	-0.0028501	ns	unchanged	1.03479e-09	-0.31589	FDR1%	0.00113887	-0.130218	FDR1%	less syn & more deg
480	A0A0G2JZZ4	Submitted name: Selenoprotein M	Selenom	5.84876e-05	-0.395034	FDR1%	0.0305953	-0.153248	ns	less syn	0.00450703	-0.159321	ns	0.0275728	-0.16112	ns	unchanged
1910	D3ZAF6		Atp5j2	0.0122046	-0.224261	ns	0.265513	0.022424	ns	unchanged	0.0555424	-0.174646	ns	0.884529	-0.00547974	ns	unchanged
5867	Q5M9H4;P13638	Sodium/potassium-transporting ATPase subunit beta-2	Atp1b2	0.664742	-0.0232172	ns	0.310184	0.0274474	ns	unchanged	0.00362841	-0.251564	ns	0.13682	-0.0685443	ns	unchanged
6241	Q63377	Sodium/potassium-transporting ATPase subunit beta-3	Atp1b3	0.228143	0.0626528	ns	0.852484	0.038481	ns	unchanged	0.453612	-0.061504	ns	0.871359	0.0208368	ns	unchanged
4417	O35179	Endophilin-A1	Sh3gl2	4.9892e-07	-0.394813	FDR1%	0.808789	-0.00637962	ns	less syn	0.219602	0.0352866	ns	0.0961	0.108391	ns	unchanged
6937	Q921A2	Proton myo-inositol cotransporter	Slc2a13	0.856153	-0.178398	ns	0.0999214	0.00555283	ns	unchanged	0.00127914	-0.61384	FDR1%	0.739432	0.0950554	ns	less syn
4684	P13234;Q63082;Q6LED8	Calcium/calmodulin-dependent protein kinase type IV	Camk4	0.0165073	-0.454208	ns	0.0361634	0.0475615	ns	unchanged	1.05653e-08	-0.610235	FDR1%	0.00954849	0.158335	ns	less syn
7155	Q9Z122;A0A140TAE1	Fatty acid desaturase 2	Fads2	1.18322e-10	-0.394423	FDR1%	0.829545	0.0769203	ns	less syn	0.143048	-0.0973347	ns	0.558322	0.00860263	ns	unchanged
6672	Q6P7A9	Lysosomal alpha-glucosidase	Gaa	0.808085	0.0352757	ns	0.00440661	0.167357	ns	unchanged	0.7703	0.0255591	ns	1.48989e-05	0.297792	FDR1%	less deg
4554_m	P04775;F1M9G9;A0A0G2K207;A9JQD7	Sodium channel protein type 2 subunit alpha	Scn2a	8.74385e-06	-0.393007	FDR1%	0.295558	0.0318277	ns	less syn	8.51641e-05	-0.238886	FDR1%	0.0542986	0.127116	ns	less syn
104_m	A0A0G2JSH9;P35704	Peroxiredoxin-2	Prdx2	0.000550707	-0.125355	FDR1%	0.00150061	0.0767391	FDR1%	slower turnover	0.061713	-0.0667823	ns	0.000539098	0.144348	FDR1%	less deg
4824	P29418;M0R601	ATP synthase subunit epsilon, mitochondrial	Atp5e;LOC100361879	0.0256903	-0.176782	ns	0.682573	-0.0242385	ns	unchanged	0.433364	-0.15534	ns	0.909684	-0.00467169	ns	unchanged
5210	P97546;P97546-3;P97546-1	Neuroplastin	Nptn	7.62008e-27	-0.595228	FDR1%	3.11817e-05	0.0770897	FDR1%	slower turnover	2.87238e-10	-0.249954	FDR1%	0.246001	-0.0132839	ns	less syn
4155	G3V927;P97839	Disks large-associated protein 4	Dlgap4	2.94404e-05	-0.391892	FDR1%	0.104142	-0.0746825	ns	less syn	1.96714e-05	-0.196505	FDR1%	0.69943	0.0837888	ns	less syn
4825	P29419	ATP synthase subunit e, mitochondrial	Atp5i	0.241815	-0.161318	ns	0.359378	-0.0265361	ns	unchanged	0.0496709	-0.154076	ns	0.3735	-0.0105915	ns	unchanged
4771	P21571	ATP synthase-coupling factor 6, mitochondrial	Atp5j	0.481855	-0.178944	ns	0.562274	0.0321014	ns	unchanged	0.526703	-0.130427	ns	0.111877	0.016221	ns	unchanged
850	A0A0G2K7Y2;A0A0G2JYS1	Submitted name: Oxidation resistance protein 1	Oxr1	0.00185933	-0.390332	FDR1%	0.296266	0.0572709	ns	less syn	0.00169949	-0.597766	FDR1%	0.041961	0.0892602	ns	less syn
6698	Q6PDU7	ATP synthase subunit g, mitochondrial	Atp5l	0.230839	-0.144637	ns	0.146173	0.0200108	ns	unchanged	0.199997	-0.0942313	ns	0.930891	-0.0101427	ns	unchanged
5184	P84076	Neuron-specific calcium-binding protein hippocalcin	Hpca	1.99087e-06	-0.389519	FDR1%	0.045455	0.235001	ns	less syn	5.80204e-06	0.326036	FDR1%	0.416112	0.216636	ns	more syn
6133	Q5XIM4	ATP synthase subunit s, mitochondrial	Atp5s	0.22137	-0.0500186	ns	0.749487	0.0391968	ns	unchanged	0.669969	-0.0902235	ns	0.114746	-0.052905	ns	unchanged
6647	Q6P503		Atp6v1d	0.00881508	-0.226535	ns	0.00931552	0.0722974	ns	unchanged	0.433646	-0.00243149	ns	0.260756	0.0437107	ns	unchanged
4918	P47861	Synaptotagmin-5	Syt5	2.28052e-05	-0.388436	FDR1%	0.0964872	0.141298	ns	less syn	0.000137595	0.198087	FDR1%	6.91406e-09	0.396871	FDR1%	more syn & less deg
1448	B2GUV5		Atp6v1g1	0.126577	-0.178299	ns	0.0589483	0.107581	ns	unchanged	0.000331843	-0.176287	FDR1%	0.200085	0.0620456	ns	less syn
6121	Q5XII0	Mammalian ependymin-related protein 1	Epdr1	0.019692	0.209978	ns	0.00740295	0.11539	ns	unchanged	0.0323773	0.114087	ns	3.40516e-05	0.287728	FDR1%	less deg
3873	F8WFM2;P85969	Beta-soluble NSF attachment protein	Napb	2.31836e-08	-0.308904	FDR1%	0.000136606	0.077101	FDR1%	slower turnover	4.01602e-06	-0.262056	FDR1%	1.57756e-05	0.107153	FDR1%	slower turnover
4410	O35052	Phosphatidate cytidylyltransferase 1	Cds1	NA	NA	NA	NA	NA	NA	NA	5.96476e-05	-0.590596	FDR1%	0.350727	-0.124858	ns	less syn
4974	P54287	Voltage-dependent L-type calcium channel subunit beta-3	Cacnb3	1.95477e-08	-0.388071	FDR1%	0.179135	-0.00122707	ns	less syn	0.000329882	0.164036	FDR1%	4.05689e-10	0.275721	FDR1%	more syn & less deg
1360	B0LPN4;B0LPN4-2;F1LS89;F1LRZ1;O08661;B3DM99;D7UNT6;D7UNT4;Q9WUE2;Q9R1G0;Q99M98	Ryanodine receptor 2	Ryr2;RATRYR2;RyR	1.95157e-15	-0.388067	FDR1%	0.6362	0.0407963	ns	less syn	0.75727	-0.00521571	ns	0.0398081	-0.0259004	ns	unchanged
4024	G3V7L8;Q6PCU2;D3ZJ78	V-type proton ATPase subunit E 1	Atp6v1e1;Atp6v1e2	0.00607661	-0.233987	ns	0.374997	0.0593539	ns	unchanged	0.969075	-0.0313548	ns	0.0621359	0.0796226	ns	unchanged
4940	P50408;B2GUW7	V-type proton ATPase subunit F	Atp6v1f;LOC501979	0.0322313	-0.274559	ns	0.0776069	0.0819639	ns	unchanged	0.497455	-0.0326949	ns	0.0180317	0.104087	ns	unchanged
3364	F1LPA3;Q76M68	IQ motif and SEC7 domain-containing protein 3	Iqsec3	1.14592e-15	-0.387814	FDR1%	0.00333308	0.116661	ns	less syn	4.3648e-38	-0.692877	FDR1%	0.0840501	-0.0968088	ns	less syn
6110	Q5XIF6	Tubulin alpha-4A chain	Tuba4a	0.000357588	-0.387068	FDR1%	0.696873	0.08165	ns	less syn	0.213294	-0.11198	ns	0.346556	0.136557	ns	unchanged
1030	A0A0H2UHH9;D4ACJ1;P62850-2;P62850-3;P62850;D3ZFZ8	40S ribosomal protein S24	LOC100363469;Rps24;LOC100912267	0.969925	-0.0277311	ns	2.14064e-05	0.0774747	FDR1%	less deg	0.471793	-0.00265101	ns	8.75711e-05	-0.131343	FDR1%	more deg
6036	Q5UAJ5;Q8SEZ4;Q8HIC8;P11608	ATP synthase protein 8	ATP8;Mt-atp8	0.46757	-0.149779	ns	0.247298	-0.00543555	ns	unchanged	NA	NA	NA	NA	NA	NA	NA
5281	Q06000	Lipoprotein lipase	Lpl	3.37376e-05	-0.38616	FDR1%	0.00343796	0.592902	ns	less syn	0.0878082	-0.139752	ns	0.376653	0.219582	ns	unchanged
5660	Q568Z6	IST1 homolog	Ist1	0.0107126	-0.200209	ns	0.000654859	0.078189	FDR1%	less deg	0.00979071	0.15776	ns	1.15405e-05	0.151978	FDR1%	less deg
2641	D3ZY50		Atpaf1	0.284255	-0.271034	ns	0.336833	0.0949273	ns	unchanged	0.590115	-0.00889189	ns	0.747712	-0.0353427	ns	unchanged
5884	Q5PPJ9;A0A0G2K9P4;D4A7V1	Endophilin-B2	Sh3glb2	8.1226e-10	-0.384745	FDR1%	0.92327	-0.00707861	ns	less syn	0.00106662	-0.246501	FDR1%	0.00378308	-0.0341627	ns	less syn
2480	D3ZTW7		Atpaf2	0.2248	-0.122289	ns	0.988566	0.0264721	ns	unchanged	0.0624774	-0.189037	ns	0.264952	-0.0503435	ns	unchanged
381	A0A0G2JXZ3;D3ZZM6		Atrx	0.243402	-0.105266	ns	0.00791112	0.398796	ns	unchanged	0.438268	0.02847	ns	0.400044	0.044689	ns	unchanged
3942	G3V6Q6;Q9JID2	Guanine nucleotide-binding protein subunit alpha-11	Gna11	0.010547	-0.164799	ns	0.00181505	0.0788321	FDR1%	less deg	0.0689352	0.111475	ns	0.000836104	0.103414	FDR1%	less deg
3515	F1LU71		Auh	0.0698701	-0.0798726	ns	0.749637	0.00121913	ns	unchanged	2.62046e-05	-0.287319	FDR1%	0.260374	-0.00173362	ns	less syn
2557	D3ZVU6		Avl9	0.112771	-0.269888	ns	0.525817	-0.0580164	ns	unchanged	0.52774	-0.134766	ns	5.61381e-06	-0.284801	FDR1%	more deg
3762	F1M953;P48721	Stress-70 protein, mitochondrial	Hspa9	0.978111	-0.0354696	ns	5.73873e-07	0.0793872	FDR1%	less deg	5.15367e-07	-0.146328	FDR1%	0.0499008	-0.0132952	ns	less syn
3168	D4AD29		Lamtor4	0.0166607	-0.117613	ns	0.000162702	0.0804292	FDR1%	less deg	0.655324	-0.00139575	ns	0.0011863	0.106665	FDR1%	less deg
1195	A1L134	Ancient ubiquitous protein 1	Aup1	NA	NA	NA	NA	NA	NA	NA	0.273808	-0.0917557	ns	0.480698	-0.0618131	ns	unchanged
1473	B2GV35		B3gat3	0.154163	-0.0488163	ns	0.284211	0.153017	ns	unchanged	0.163516	-0.091082	ns	0.334112	-0.0956958	ns	unchanged
4578	P07151	Beta-2-microglobulin	B2m	0.264173	0.0444286	ns	0.97728	0.0833365	ns	unchanged	0.0334564	-0.125179	ns	0.639133	-0.11063	ns	unchanged
1283	B0BN74;F1LQH9		Bag2	0.0180933	-0.28429	ns	0.420871	0.121207	ns	unchanged	6.48759e-05	-0.380871	FDR1%	0.124284	-0.0706563	ns	less syn
236	A0A0G2JUT7	Submitted name: Beta 3-glucosyltransferase	B3glct	0.497509	-0.167767	ns	0.984177	-0.0206298	ns	unchanged	0.716272	-0.22077	ns	0.323792	-0.208496	ns	unchanged
6128	Q5XIJ6	BRISC and BRCA1-A complex member 1	Babam1	0.55285	-0.117374	ns	0.0264261	0.135257	ns	unchanged	0.0910194	-0.105619	ns	0.0496229	0.118135	ns	unchanged
4999	P56819	Beta-secretase 1	Bace1	0.426706	-0.156848	ns	0.0677555	0.246435	ns	unchanged	0.0266682	0.36986	ns	0.285004	0.232015	ns	unchanged
5730	Q5EAN5;Q9ET20	Secretory carrier-associated membrane protein 4	Scamp4	0.0404619	-0.0924993	ns	0.00164044	0.0809751	FDR1%	less deg	0.0344277	-0.0992519	ns	0.00112775	0.131771	FDR1%	less deg
4594	P07943	Aldose reductase	Akr1b1	0.238393	0.0626587	ns	0.00105993	0.081273	FDR1%	less deg	0.771013	0.0429165	ns	3.68768e-15	0.203223	FDR1%	less deg
5919	Q5QJC9	BAG family molecular chaperone regulator 5	Bag5	0.127734	-0.126186	ns	0.00809801	0.118951	ns	unchanged	0.135799	-0.0713705	ns	0.0302651	0.0854389	ns	unchanged
3890	G3V661;Q2V6G6		Baz1b	0.0721306	-0.101751	ns	0.00814612	0.446799	ns	unchanged	0.041858	0.123052	ns	0.110661	0.0741959	ns	unchanged
5225	P97710	Tyrosine-protein phosphatase non-receptor type substrate 1	Sirpa	8.40781e-06	-0.384597	FDR1%	0.855215	-0.0638066	ns	less syn	0.261098	-0.114912	ns	0.796084	0.0276026	ns	unchanged
6489	Q6AY58		Bcap31	0.456021	-0.0768096	ns	0.349949	0.0856285	ns	unchanged	0.50451	0.0913308	ns	0.862843	0.0447723	ns	unchanged
5275	Q05175	Brain acid soluble protein 1	Basp1	0.0481404	-0.171645	ns	0.194156	-0.0386242	ns	unchanged	0.911396	-0.0389142	ns	0.0115145	0.120454	ns	unchanged
567	A0A0G2K1L8	Submitted name: Brain acid soluble protein 1	Basp1	0.8776	-0.043052	ns	0.539331	-0.0283791	ns	unchanged	0.796188	0.00214069	ns	0.0411655	0.131776	ns	unchanged
4134	G3V8T9;Q9JKL3;Q63690	Apoptosis regulator BAX	Bax	0.956212	-0.0112506	ns	0.120537	0.0983285	ns	unchanged	0.0327558	0.210285	ns	0.144995	0.115296	ns	unchanged
1776	B5DFM8		Bcas2	0.530973	-0.0364322	ns	0.59635	-0.0630696	ns	unchanged	0.885678	-0.0612056	ns	0.191847	0.0796401	ns	unchanged
1264	B0BN06		Bcas3	0.00408099	-0.268085	ns	0.141109	0.0915878	ns	unchanged	0.220863	0.129867	ns	0.201991	0.0537776	ns	unchanged
2455	D3ZT71		Bcl2l13	0.00996962	-0.151456	ns	0.115075	-0.0728163	ns	unchanged	0.0340578	-0.113372	ns	0.758546	0.00250415	ns	unchanged
2031	F1LVA8;D3ZE30;Q63767-2;Q63767	Breast cancer anti-estrogen resistance protein 1	Bcar1	0.00582435	-0.134065	ns	0.172408	0.124742	ns	unchanged	0.225027	-0.0849671	ns	0.576931	0.0745332	ns	unchanged
4448	O35867	Neurabin-1	Ppp1r9a	2.83987e-06	-0.384275	FDR1%	0.00991891	-0.146381	ns	less syn	0.626675	0.0130185	ns	0.15268	-0.0565613	ns	unchanged
3572	F1LXF1		Bcr	0.0164813	-0.193229	ns	0.103589	0.138872	ns	unchanged	0.527413	-0.116008	ns	0.916905	-0.0111266	ns	unchanged
6132	Q5XIM0		Bcs1l	0.724764	0.00690102	ns	0.398595	0.0193904	ns	unchanged	0.949259	0.0363791	ns	0.368856	0.00472942	ns	unchanged
4136	G3V8U8;O35854;Q6P784	Branched-chain-amino-acid aminotransferase;Branched-chain-amino-acid aminotransferase, mitochondrial	Bcat2	0.718249	-0.0967025	ns	0.341374	-0.00262487	ns	unchanged	0.952035	-0.0746187	ns	0.328406	-0.0326864	ns	unchanged
1388	B1WBN3;F7EV94;P11960;Q5EB89	2-oxoisovalerate dehydrogenase subunit alpha, mitochondrial	Bckdha	0.240327	-0.0653736	ns	0.84273	0.00688187	ns	unchanged	0.724167	-0.0605007	ns	0.0157288	-0.0716581	ns	unchanged
75	B0BNK6;A0A0A0MXW1;P35738	2-oxoisovalerate dehydrogenase subunit beta, mitochondrial	Bckdhb	0.09974	-0.09725	ns	0.803894	0.0237697	ns	unchanged	0.443662	-0.0872853	ns	0.379055	-0.076386	ns	unchanged
1052	A0A0H2UHR5;Q00972	[3-methyl-2-oxobutanoate dehydrogenase [lipoamide]] kinase, mitochondrial	Bckdk	0.0664727	-0.126408	ns	0.049103	0.131489	ns	unchanged	0.341451	-0.0328831	ns	0.164964	-0.0800079	ns	unchanged
4740	P19139	Casein kinase II subunit alpha	Csnk2a1	1.88762e-05	-0.188972	FDR1%	0.00189808	0.081434	FDR1%	slower turnover	0.231153	0.0677121	ns	8.49736e-05	0.145705	FDR1%	less deg
4683	P13221	Aspartate aminotransferase, cytoplasmic	Got1	2.7247e-11	-0.2472	FDR1%	1.06049e-06	0.081452	FDR1%	slower turnover	0.000940754	-0.131453	FDR1%	7.89033e-19	0.186201	FDR1%	slower turnover
1733	B5DF65		Blvrb	0.380289	-0.105904	ns	0.379024	0.0917047	ns	unchanged	0.259338	0.168539	ns	0.000226664	0.235624	FDR1%	less deg
2458	D3ZT98		Bola3	0.792354	-0.165914	ns	0.681058	-0.00161425	ns	unchanged	0.559918	-0.0698641	ns	0.0095277	-0.169078	ns	unchanged
5384	Q3B8N9		Bphl	0.141464	-0.180472	ns	0.793106	-0.0275439	ns	unchanged	0.410745	0.128211	ns	0.647529	-0.00572738	ns	unchanged
5885	Q5PPL3	Sterol-4-alpha-carboxylate 3-dehydrogenase, decarboxylating	Nsdhl	3.45413e-11	-0.383704	FDR1%	0.00572444	0.134474	ns	less syn	2.08514e-22	-0.604642	FDR1%	0.851908	-0.0747733	ns	less syn
1376	B1H267	Sorting nexin-5	Snx5	0.282444	0.0430546	ns	0.00193695	0.0825692	FDR1%	less deg	0.469278	-0.0399874	ns	0.306975	0.0638503	ns	unchanged
6201	Q62896	BET1 homolog	Bet1	0.169595	0.107974	ns	0.490916	0.207221	ns	unchanged	0.287498	0.171144	ns	0.444829	-0.0208928	ns	unchanged
4406	O08839-2;O08839;O08839-5;F1LMX1;O08839-3;D4A4P1;Q5HZA7;O08839-6;O08839-4	Myc box-dependent-interacting protein 1	Bin1	0.00582562	-0.18513	ns	0.825935	-0.0317934	ns	unchanged	0.686497	-0.000239662	ns	0.507262	0.0150316	ns	unchanged
3830	F2Z3T7;Q6I7R3	Isochorismatase domain-containing protein 1	Isoc1	0.305083	-0.118337	ns	0.000676881	0.083227	FDR1%	less deg	0.11798	0.155166	ns	7.96338e-12	0.220295	FDR1%	less deg
5168	P70645;A1A5L1;A0A096MJX0	Bleomycin hydrolase	Blmh;LOC100911400	0.0463758	-0.145879	ns	0.154781	0.0542141	ns	unchanged	0.74137	0.013711	ns	0.0302408	0.123747	ns	unchanged
4977	P54319	Phospholipase A-2-activating protein	Plaa	0.148243	-0.0668791	ns	1.62506e-05	0.0854467	FDR1%	less deg	0.833414	0.000942311	ns	3.13021e-08	0.118014	FDR1%	less deg
2723	D4A0A1		Soga3	2.45598e-06	-0.382426	FDR1%	0.0534685	0.121461	ns	less syn	0.0283526	0.136017	ns	0.00136049	0.154206	FDR1%	less deg
3028	D4A8L9		Btbd17	0.826028	0.0448074	ns	0.486919	-0.0217498	ns	unchanged	0.661931	0.0831235	ns	0.633846	-0.00809123	ns	unchanged
1164	A0A1W2Q6L3;D4ABL6;D3Z8Q9		Mctp1	0.00136773	-0.382031	FDR1%	0.253937	-0.0639243	ns	less syn	0.0535397	-0.175025	ns	0.65928	0.00458022	ns	unchanged
5895	Q5PQN0	Neurocalcin-delta	Ncald	0.000354737	-0.381896	FDR1%	0.330862	0.0311648	ns	less syn	2.08416e-12	-0.592591	FDR1%	0.00592217	0.0430445	ns	less syn
4384	O08557	N(G),N(G)-dimethylarginine dimethylaminohydrolase 1	Ddah1	0.259686	-0.0659924	ns	0.699426	0.000294533	ns	unchanged	5.86562e-18	-0.575643	FDR1%	0.0464226	0.0768107	ns	less syn
3784	F1MA15;Q8K1M8;A0A096MJX1	BMP/retinoic acid-inducible neural-specific protein 2	Brinp2	0.0324204	-0.130508	ns	0.00667203	-0.10781	ns	unchanged	0.0167237	0.214199	ns	0.0368574	0.0848179	ns	unchanged
6262	Q63564	Synaptic vesicle glycoprotein 2B	Sv2b	6.36647e-05	-0.379859	FDR1%	0.41793	0.00291059	ns	less syn	0.00139822	0.256855	FDR1%	0.000198501	0.172824	FDR1%	more syn & less deg
6117	Q5XIG9		Mtfp1	0.86728	-0.187539	ns	0.00045054	0.0862502	FDR1%	less deg	0.542996	-0.247256	ns	0.236029	-0.00289766	ns	unchanged
1443	B2DD29	Serine/threonine-protein kinase BRSK1	Brsk1	0.00792012	-0.271408	ns	0.853118	0.0442535	ns	unchanged	0.224304	0.0679352	ns	0.00165906	0.176421	ns	unchanged
2515	D3ZUP5		Brk1	5.12894e-05	-0.379269	FDR1%	0.134991	0.0652859	ns	less syn	0.428465	-0.0744444	ns	0.349734	0.0779962	ns	unchanged
4803	Q6GT74;P26453-2;P26453	Selenoprotein M	Bsg	0.741037	-0.0225961	ns	0.20574	0.0332228	ns	unchanged	0.984406	-0.0112765	ns	0.126628	0.092393	ns	unchanged
7058	Q9JKB7;Q9WTT6	Guanine deaminase	Gda	1.85823e-08	-0.335114	FDR1%	1.55875e-05	0.0862766	FDR1%	slower turnover	6.8448e-07	-0.289451	FDR1%	4.9447e-06	0.118581	FDR1%	slower turnover
5483	Q4FZS2;D4A567;Q7TP72		Bub3	0.327352	-0.00514089	ns	0.386851	0.064372	ns	unchanged	0.318805	0.0431647	ns	0.56708	0.0436893	ns	unchanged
4428	O35331;G3V647;D3Z8P5	Pyridoxal kinase	Pdxk;RGD1566085	0.0191708	-0.269962	ns	0.13104	0.0872955	ns	unchanged	3.89572e-13	-0.566322	FDR1%	0.144148	0.0908769	ns	less syn
6030	Q5U3Y8;M0R5M7	Transcription factor BTF3	Btf3;RGD1563812	0.691269	0.0436375	ns	0.189845	0.126421	ns	unchanged	0.0211716	-0.149979	ns	0.0702721	-0.098088	ns	unchanged
1730	F7EUJ8;B5DF52		C1qtnf4	0.148064	-0.212073	ns	0.0240805	0.304941	ns	unchanged	0.000125203	-0.355403	FDR1%	0.182051	-0.220334	ns	less syn
5987	Q5U2P5		C2cd2l	NA	NA	NA	NA	NA	NA	NA	0.000112394	-0.493747	FDR1%	0.450598	0.00101317	ns	less syn
4169	G3V984;A0A0G2K1X6		Bsn	7.64461e-05	-0.377114	FDR1%	0.496557	-0.0718105	ns	less syn	0.0908523	-0.13477	ns	0.69475	0.0153192	ns	unchanged
991	A0A0G2KB46;D4AD82;P81128	Rho GTPase-activating protein 35	Arhgap35	0.175159	-0.0679072	ns	0.000929234	0.0866609	FDR1%	less deg	0.000698594	0.132396	FDR1%	0.281092	0.0546794	ns	more syn
4442	O35796	Complement component 1 Q subcomponent-binding protein, mitochondrial	C1qbp	0.764291	-0.0485478	ns	0.943554	0.00687239	ns	unchanged	0.439734	-0.0770012	ns	0.534832	0.0149936	ns	unchanged
3796	F1MA97		Thsd7a	1.82478e-09	-0.375595	FDR1%	0.522015	-0.0525564	ns	less syn	1.77012e-05	-0.206701	FDR1%	0.807044	0.0106269	ns	less syn
63	A0A096P6L7;M0R4L3;A0A0A0MP84;Q2M2R8;A0A0H2UHI4	Peroxisomal targeting signal 1 receptor	Pex5	0.00363895	0.0899204	ns	0.17028	0.13633	ns	unchanged	1.02922e-13	-0.547362	FDR1%	0.649173	-0.00286964	ns	less syn
5074	P62762;Q56A29	Visinin-like protein 1	Vsnl1	8.92161e-15	-0.375441	FDR1%	0.199867	0.0229175	ns	less syn	1.07484e-39	-0.752606	FDR1%	0.51539	-0.0561167	ns	less syn
4774	P21708;P21708-2	Mitogen-activated protein kinase 3	Mapk3	0.244555	-0.264768	ns	0.00576153	0.159456	ns	unchanged	0.522041	0.00994006	ns	2.62962e-07	0.284698	FDR1%	less deg
3437	F1LR98;Q8R5H2;Q9JIW3		Cdh10	7.69685e-06	-0.374456	FDR1%	0.706747	-0.00794459	ns	less syn	6.69741e-09	-0.494149	FDR1%	0.810478	-0.0304821	ns	less syn
5790	Q5HZA9	Transmembrane protein 126A	Tmem126a	0.000474729	-0.373261	FDR1%	0.725439	0.0773296	ns	less syn	0.994106	0.0600773	ns	0.109364	0.0780527	ns	unchanged
2676	M0RAX4;D3ZZ54;P62882;Q45QL0	Guanine nucleotide-binding protein subunit beta-5	Gnb5	0.134625	-0.139362	ns	0.619588	-0.0139598	ns	unchanged	1.93399e-12	-0.547072	FDR1%	0.61871	0.02471	ns	less syn
6072	Q5XI64	Monoacylglycerol lipase ABHD6	Abhd6	4.40237e-05	-0.372873	FDR1%	0.00813871	0.104061	ns	less syn	6.93899e-05	-0.241823	FDR1%	0.375709	-0.0581793	ns	less syn
5437	Q3ZBA0	Tectonin beta-propeller repeat-containing protein 1	Tecpr1	3.81461e-07	-0.371829	FDR1%	0.0286959	0.0624674	ns	less syn	0.548896	0.0481541	ns	0.063034	0.125883	ns	unchanged
6227	Q63155;F1LRN5;Q63153	Netrin receptor DCC	Dcc;DCC	3.31674e-20	-0.371353	FDR1%	0.0379087	-0.0523511	ns	less syn	0.779275	0.0302145	ns	0.00144806	0.166508	FDR1%	less deg
6994	Q9EQS0	Transaldolase	Taldo1	0.432571	0.0528058	ns	0.00139091	0.0866858	FDR1%	less deg	4.15844e-06	0.128722	FDR1%	2.48622e-07	0.149049	FDR1%	more syn & less deg
4100	G3V8G4;P55068;P55068-2;A0A0G2JYH8	Brevican core protein	Bcan	0.0581888	0.065886	ns	0.00171434	0.0870539	FDR1%	less deg	0.16692	-0.0803568	ns	0.0262079	0.0571959	ns	unchanged
6759	Q71RJ2;Q99PR9	Voltage-dependent calcium channel gamma-2 subunit;Voltage-dependent calcium channel gamma subunit	Cacng2	0.18089	-0.24354	ns	0.0951965	-0.0578654	ns	unchanged	0.376418	-0.243703	ns	0.430822	0.0436678	ns	unchanged
7128	Q9WUC4	Copper transport protein ATOX1	Atox1	0.00394849	-0.195036	ns	0.229165	0.0548161	ns	unchanged	0.0473181	0.132413	ns	5.23287e-06	0.277673	FDR1%	less deg
620	A0A0G2K2T2;D4A5P3		Fam73a	0.000384349	-0.371039	FDR1%	0.0584301	0.128964	ns	less syn	0.464689	0.0624192	ns	0.359479	-0.0552929	ns	unchanged
3197	D4AE00	AP-3 complex subunit beta	Ap3b2	1.06347e-05	-0.210822	FDR1%	2.34726e-05	0.0873475	FDR1%	slower turnover	0.150624	-0.0625744	ns	0.0092423	0.0774703	ns	unchanged
1693	B5DEN4;P04642;Q6P9U7;H9N9H4;Q6AYX2;P19629	L-lactate dehydrogenase;L-lactate dehydrogenase A chain;L-lactate dehydrogenase C chain	Ldha;LDHC;Ldhc	7.9891e-19	-0.370676	FDR1%	0.0685751	0.0256472	ns	less syn	1.81368e-10	-0.228712	FDR1%	7.75021e-21	0.212873	FDR1%	slower turnover
5043	P61972	Nuclear transport factor 2	Nutf2	0.039448	-0.126869	ns	0.000521566	0.0882253	FDR1%	less deg	0.782302	-0.0320444	ns	2.87348e-09	0.198809	FDR1%	less deg
6344	Q64654	Lanosterol 14-alpha demethylase	Cyp51a1	4.22448e-14	-0.368958	FDR1%	0.33006	0.144201	ns	less syn	3.45247e-22	-0.661671	FDR1%	0.000192424	-0.407646	FDR1%	less syn & more deg
929	A0A0G2K9L9;A0A096MJ77		Mdn1	1.59896e-05	-0.368916	FDR1%	0.0364802	0.0412879	ns	less syn	0.000710068	-0.240775	FDR1%	0.297855	0.0917869	ns	less syn
6862	Q8CGU4;A0A0G2JVS4	Arf-GAP with GTPase, ANK repeat and PH domain-containing protein 2	Agap2	1.39162e-12	-0.367162	FDR1%	0.00509791	0.0412374	ns	less syn	7.63156e-05	-0.192189	FDR1%	0.324937	0.0392226	ns	less syn
3287	F1LLX6		Cadps	0.00742895	-0.116519	ns	0.883252	0.00788809	ns	unchanged	0.00389919	-0.221702	ns	0.341775	0.063405	ns	unchanged
5586	Q4V882	Epsin-3	Epn3	2.58222e-05	-0.366858	FDR1%	0.48172	0.0694302	ns	less syn	0.000245355	0.237112	FDR1%	0.0141504	0.135365	ns	more syn
1008	A0A0G2QC31;Q56A30;P35234	Protein-tyrosine-phosphatase;Tyrosine-protein phosphatase non-receptor type 5	Ptpn5	0.0472149	-0.224837	ns	0.384997	0.0782924	ns	unchanged	0.00014459	-0.532209	FDR1%	0.436012	-0.0618239	ns	less syn
5289	Q07310-3;Q07310-17;Q07310;Q07310-19;Q07310-18;Q07310-8;Q07310-6;Q07310-5;Q07310-4;Q07310-2;Q07310-14;Q07310-13;Q07310-12;Q07310-11;Q07310-16;Q07310-15;Q07310-10;Q07310-9	Neurexin-3	Nrxn3	5.91966e-05	-0.366803	FDR1%	0.204625	0.0899342	ns	less syn	0.0980409	-0.0238994	ns	0.00422467	0.0815233	ns	unchanged
4732	P18418	Calreticulin	Calr	0.0054782	-0.089673	ns	0.489263	0.0180625	ns	unchanged	2.15656e-06	-0.131085	FDR1%	0.000280205	-0.127017	FDR1%	less syn & more deg
5754	Q5FVI6	V-type proton ATPase subunit C 1	Atp6v1c1	1.34537e-08	-0.252076	FDR1%	3.05837e-05	0.0890213	FDR1%	slower turnover	0.132153	-0.0375951	ns	0.0374609	0.0808923	ns	unchanged
5412	Q3MID6;O35783	Calumenin	Calu	0.769931	-0.0907155	ns	0.970199	0.0996892	ns	unchanged	NA	NA	NA	NA	NA	NA	NA
6246	Q63450	Calcium/calmodulin-dependent protein kinase type 1	Camk1	0.817262	-0.0280395	ns	0.0272904	0.306403	ns	unchanged	0.0681682	-0.237523	ns	0.715728	0.0110124	ns	unchanged
3948	G3V6S3		Calu	0.304737	-0.0447405	ns	0.300213	-0.0440791	ns	unchanged	1.00803e-05	-0.307018	FDR1%	0.0643783	-0.160004	ns	less syn
4639	P10111;A0A0G2K1P0;A0A0G2K2E4;M0RCZ9	Peptidyl-prolyl cis-trans isomerase A;Peptidyl-prolyl cis-trans isomerase A, N-terminally processed;Peptidyl-prolyl cis-trans isomerase	Ppia;RGD1559682	6.81598e-07	-0.231829	FDR1%	2.52409e-07	0.0892473	FDR1%	slower turnover	0.395461	0.0237221	ns	6.20846e-14	0.181971	FDR1%	less deg
3095	D4AAX6	Phosphoinositide phospholipase C	Plch2	0.146957	-0.179069	ns	0.420383	0.0306851	ns	unchanged	1.37427e-07	-0.530159	FDR1%	0.00430612	0.156086	ns	less syn
4712	P15791;P15791-6;P15791-2;P15791-3;P15791-4;P15791-5;P15791-7	Calcium/calmodulin-dependent protein kinase type II subunit delta	Camk2d	0.38973	-0.0562392	ns	0.0682671	0.0896916	ns	unchanged	0.601969	-0.11295	ns	0.660492	0.0784911	ns	unchanged
3541	F1LVR4		Camk1d	0.0379284	-0.195926	ns	0.242107	0.136423	ns	unchanged	0.000356033	0.369681	FDR1%	0.00626911	0.240049	ns	more syn
4688	Q6PDV6;P13471	40S ribosomal protein S14	Rps14	0.746687	-0.0297623	ns	0.000122596	0.0894177	FDR1%	less deg	0.0643709	-0.112069	ns	0.0152316	-0.174414	ns	unchanged
134	A0A0G2JSR2;B1AC44;P40748;Q5M8A7	Synaptotagmin-3	Syt3	0.001973	-0.36551	FDR1%	0.923984	-0.00824913	ns	less syn	0.351955	0.0377751	ns	0.216699	0.113191	ns	unchanged
3475	F1LSD5;A0A0G2JXV6;Q9JLS3-2	Serine/threonine-protein kinase TAO2	Taok2	0.000579142	-0.364934	FDR1%	0.220224	-0.0741454	ns	less syn	0.352847	0.16333	ns	0.319574	0.121633	ns	unchanged
6572	Q6DGG9;Q9ERK1;A0A1L1WKE8		Camlg	0.0113746	-0.263766	ns	0.0499473	0.226436	ns	unchanged	0.69001	-0.0452709	ns	0.0455179	0.123116	ns	unchanged
2162	D3ZHY9		Rasal1	8.78547e-06	-0.36454	FDR1%	0.836597	0.0419296	ns	less syn	0.00673252	0.222614	ns	3.5049e-08	0.184486	FDR1%	less deg
4418	O35180;Q9JKT0	Endophilin-A3	Sh3gl3	0.149284	-0.140798	ns	0.0875969	-0.0591845	ns	unchanged	5.19697e-10	0.638515	FDR1%	0.000116039	0.156854	FDR1%	more syn & less deg
5188	P84087	Complexin-2	Cplx2	0.00139357	-0.36454	FDR1%	0.592356	-0.00345558	ns	less syn	0.907175	0.057054	ns	0.299579	0.0721579	ns	unchanged
7127	Q9WU70-2;Q9WU70;Q9WU70-3	Syntaxin-binding protein 5	Stxbp5	4.46834e-05	-0.245113	FDR1%	0.000491167	0.0899069	FDR1%	slower turnover	0.440683	0.0210581	ns	4.92173e-07	0.159216	FDR1%	less deg
2632	D3ZXQ2;A0A0G2K5C0		Camsap3	0.00743904	-0.176493	ns	0.750016	-0.0163401	ns	unchanged	0.0143188	0.147493	ns	0.1318	0.119585	ns	unchanged
5716	Q5BK47	Oxysterol-binding protein	Osbpl2	0.878621	-0.201418	ns	0.26457	0.0897894	ns	unchanged	0.0294764	0.231625	ns	5.10029e-06	0.269977	FDR1%	less deg
508	A0A0G2K0J2;F1M9X7;Q8CFG6	Voltage-dependent calcium channel subunit alpha-2/delta-2;Voltage-dependent calcium channel subunit alpha-2-2;Voltage-dependent calcium channel subunit delta-2	Cacna2d2	0.93118	0.00479661	ns	0.10796	0.159468	ns	unchanged	1.882e-05	-0.51773	FDR1%	0.0169565	0.110891	ns	less syn
130	A0A0G2JSQ1;Q63754	Beta-synuclein	Sncb	0.00405098	-0.235142	ns	0.248052	-0.0402755	ns	unchanged	2.94691e-05	-0.516995	FDR1%	0.01788	-0.0759462	ns	less syn
6589	Q6IMY6;Q64194	Lipase;Lysosomal acid lipase/cholesteryl ester hydrolase	Lipa	0.0723743	-0.228131	ns	0.0120042	0.0502948	ns	unchanged	2.79992e-08	0.624477	FDR1%	3.36804e-07	0.239721	FDR1%	more syn & less deg
1479	B2GV57		Cars2	0.451143	-0.100581	ns	0.548725	0.0191392	ns	unchanged	0.186102	-0.155724	ns	0.195111	-0.0102575	ns	unchanged
4767	P20651;A0A0G2K7T5	Serine/threonine-protein phosphatase 2B catalytic subunit beta isoform	Ppp3cb	3.19719e-06	-0.364188	FDR1%	0.143384	-0.0143693	ns	less syn	0.961746	-0.0257319	ns	0.00432091	0.163339	ns	unchanged
1460	B2GUZ5	F-actin-capping protein subunit alpha-1	Capza1	0.133305	-0.0718429	ns	0.685322	0.0281792	ns	unchanged	0.0132807	-0.150696	ns	0.0627325	0.076432	ns	unchanged
3429	F1LR18;P18890	Rho GTPase-activating protein 39	Arhgap39	2.25056e-09	-0.364046	FDR1%	0.684922	-0.030326	ns	less syn	0.887619	0.0366577	ns	0.104685	0.104373	ns	unchanged
4659	P11505-4;P11505;P11505-6;P11505-3;P11505-5;P11505-2	Plasma membrane calcium-transporting ATPase 1	Atp2b1	4.35417e-15	-0.363856	FDR1%	0.0759975	0.0492143	ns	less syn	0.0637433	-0.0706915	ns	0.0208561	0.0404751	ns	unchanged
2566	D3ZW58		Casc4	0.200679	-0.163992	ns	0.0765823	0.13064	ns	unchanged	0.0147735	-0.0490392	ns	0.364717	-0.259447	ns	unchanged
5480	Q4AE70;A0A068FP44;Q4AE70-3;Q4AE70-4;Q4AE70-2	Histone-arginine methyltransferase CARM1	Carm1;CARM1	0.299899	-0.248365	ns	0.0508022	0.167864	ns	unchanged	0.915712	-0.0203118	ns	0.114961	0.0831847	ns	unchanged
2530	D3ZV15;A0A0U1ZFN5;A0A0U1ZEI3		Cbl	0.0225863	-0.217211	ns	0.964239	0.0912322	ns	unchanged	0.000667529	0.33097	FDR1%	0.00170768	0.334875	ns	more syn
2845	D4A3T3		Cbx1	0.192003	-0.132622	ns	0.263717	0.147945	ns	unchanged	0.818348	-0.0108032	ns	0.386124	0.0809171	ns	unchanged
611	A0A0G2K2L8;Q62915;O35807	Peripheral plasma membrane protein CASK	Cask;mdg2	0.0927622	-0.176	ns	0.290929	-0.0144523	ns	unchanged	0.754604	0.0123912	ns	0.00410692	0.107976	ns	unchanged
705	A0A0G2K4R1	Submitted name: Protein phosphatase 1, regulatory subunit 12C	Ppp1r12c	0.039767	-0.154558	ns	0.00143699	0.0902201	FDR1%	less deg	0.629936	-0.0263255	ns	0.274315	0.101142	ns	unchanged
143	A0A0G2JSY2;F1LPH1;P27321-4;P27321-2;P27321;D3ZL24;P27321-6;P27321-5;P27321-3;O55155;D4A129;P27321-7	Calpastatin	Cast	NA	NA	NA	NA	NA	NA	NA	0.435965	0.0233406	ns	0.0968686	0.180287	ns	unchanged
3555	F1LWG2		Prmt8	1.16689e-13	-0.3614	FDR1%	0.00611439	0.0932101	ns	less syn	3.98727e-23	-0.620244	FDR1%	0.515048	-0.0349727	ns	less syn
4215	I2FHN3;P07154	Cathepsin L1;Procathepsin L;Cathepsin L1 heavy chain;Cathepsin L1 light chain	CatL;Ctsl	0.809417	0.00246101	ns	0.773576	-0.0232002	ns	unchanged	0.988596	0.0472491	ns	0.0816418	0.235857	ns	unchanged
2812	D4A2P1		Ccar1	0.0537046	-0.113995	ns	0.641526	0.0314062	ns	unchanged	0.859548	-0.00118502	ns	0.185581	-0.127756	ns	unchanged
4912	P47727;M0R3X6;A0A0G2JSV2;A0A0G2K658;A0A096MJ24;O08559;Q9QZI6;Q9QZI5	Carbonyl reductase [NADPH] 1	Cbr1	0.0316098	-0.16659	ns	0.0587146	0.105901	ns	unchanged	0.400414	-0.264493	ns	0.0100595	0.102742	ns	unchanged
6821	Q7TS56	Carbonyl reductase family member 4	Cbr4	0.852111	-0.0428643	ns	0.219288	-0.0323686	ns	unchanged	0.18534	-0.17618	ns	0.0778694	-0.0592549	ns	unchanged
4792	P24155;A0A0G2KAW4	Thimet oligopeptidase	Thop1	0.00490289	-0.142686	ns	0.000923622	0.0908674	FDR1%	less deg	0.807918	0.0489141	ns	0.0446753	0.0618156	ns	unchanged
4125	G3V8R2;P55067;A0A0G2K4R4;O70474	Neurocan core protein;150 kDa adult core glycoprotein	Ncan	3.71779e-07	0.181091	FDR1%	2.55612e-06	0.09111	FDR1%	more syn & less deg	5.21989e-29	-0.632977	FDR1%	0.0775382	0.053853	ns	less syn
6371	Q66HA5;Q66HA5-2	Coiled-coil and C2 domain-containing protein 1A	Cc2d1a	0.00482503	-0.231208	ns	0.633779	0.0044722	ns	unchanged	0.0139883	-0.0149944	ns	0.239466	0.0374888	ns	unchanged
1495	B2GV96		Ccdc115	0.0611483	-0.115995	ns	0.0103392	0.128724	ns	unchanged	0.727445	0.106671	ns	0.275294	0.0216744	ns	unchanged
6095	Q5XIC2	Evolutionarily conserved signaling intermediate in Toll pathway, mitochondrial	Ecsit	0.0331278	-0.137903	ns	0.00219989	0.0925198	FDR1%	less deg	0.0290775	-0.148881	ns	0.811091	0.0484395	ns	unchanged
4064	G3V827;Q08415-2;Q08415	Kynurenine--oxoglutarate transaminase 1, mitochondrial	Ccbl1	0.502872	-0.149386	ns	0.205892	0.11782	ns	unchanged	0.174661	-0.193159	ns	0.099745	0.049178	ns	unchanged
1974	D3ZCA0		Prosc	0.00464368	-0.154551	ns	0.000138873	0.0925584	FDR1%	less deg	0.00512272	-0.175648	ns	0.0353873	0.0290915	ns	unchanged
2718	D4A055-1;D4A055		Cacnb4	2.8797e-05	-0.359434	FDR1%	0.45067	0.0486167	ns	less syn	0.771685	0.0779316	ns	5.84558e-10	0.403067	FDR1%	less deg
4538	P01830	Thy-1 membrane glycoprotein	Thy1	5.08437e-08	-0.359418	FDR1%	0.011201	0.0914345	ns	less syn	4.87919e-17	-0.780238	FDR1%	0.0255017	0.0242832	ns	less syn
642	A0A0G2K350;D4A0E2		Napg	1.26577e-10	-0.358909	FDR1%	0.0181011	0.0636432	ns	less syn	1.66273e-08	-0.252714	FDR1%	0.000257983	0.105104	FDR1%	slower turnover
5202	P86182	Coiled-coil domain-containing protein 22	Ccdc22	0.6153	-0.136098	ns	0.00605443	0.110011	ns	unchanged	0.103773	0.0836899	ns	0.0567326	0.141836	ns	unchanged
2817	D4A305		Ccdc58	0.425498	-0.082937	ns	0.907548	-0.025493	ns	unchanged	0.00423804	-0.2413	ns	0.238824	-0.0192063	ns	unchanged
362	A0A0H2UHS3;A0A0G2JXH2;Q5PPN7	Coiled-coil domain-containing protein 51	Ccdc51	0.213095	-0.123749	ns	0.711731	0.0480132	ns	unchanged	0.534218	-0.0156178	ns	0.459115	0.00876462	ns	unchanged
3228	D4AEK9		Ccdc6	0.815941	-0.0369618	ns	0.197195	0.10044	ns	unchanged	0.27895	0.0260716	ns	0.0312742	0.162046	ns	unchanged
6209_m	Q62976;Q62976-11;A0A0G2K104;Q62976-2;Q62976-3;Q62976-8;Q62976-9;Q62976-10;F1LNC7	Calcium-activated potassium channel subunit alpha-1	Kcnma1	3.14231e-10	-0.358753	FDR1%	0.803131	0.00300583	ns	less syn	1.34721e-05	-0.273294	FDR1%	2.98126e-05	0.105209	FDR1%	slower turnover
4762	P20272;Q99NU2	Cannabinoid receptor 1	Cnr1	0.849973	-0.0900187	ns	0.960954	0.0521833	ns	unchanged	0.0465632	-0.127202	ns	4.3895e-05	0.266738	FDR1%	less deg
5696	Q5BJT7	Coiled-coil domain-containing protein 93	Ccdc93	0.257346	-0.0386124	ns	0.0871958	0.0752474	ns	unchanged	0.25578	0.03103	ns	0.908714	0.0966484	ns	unchanged
4421	O35263;A0JN11	Platelet-activating factor acetylhydrolase IB subunit gamma	Pafah1b3	0.342622	0.0752204	ns	0.00187031	0.0945059	FDR1%	less deg	4.8269e-05	0.566473	FDR1%	1.32015e-05	0.250954	FDR1%	more syn & less deg
3681	F1M4U0		Ccnyl1	0.771688	-0.139141	ns	0.268641	-0.0159396	ns	unchanged	NA	NA	NA	NA	NA	NA	NA
7018	Q9ET55	Nocturnin	Ccrn4l	0.39028	-0.137597	ns	0.7279	0.0618202	ns	unchanged	0.00886479	-0.217154	ns	0.546277	-0.0420618	ns	unchanged
1993	D3ZCU8		Rab33a	1.34502e-06	-0.357805	FDR1%	0.610932	0.021848	ns	less syn	0.000589342	-0.226373	FDR1%	0.00012148	0.15764	FDR1%	slower turnover
5021	P60881;F8WG75	Synaptosomal-associated protein 25;Synaptosomal-associated protein	Snap25	3.23479e-12	-0.357019	FDR1%	0.753255	0.0256993	ns	less syn	0.000977703	-0.121785	FDR1%	0.744796	0.0511853	ns	less syn
3587	F1LYG2;Q5BJW2		Sipa1l3	0.000761683	-0.356688	FDR1%	0.310764	-0.0144904	ns	less syn	2.99276e-07	0.341739	FDR1%	0.14789	0.0960885	ns	more syn
746	A0A0G2K5L2;Q5FVG4		LOC100911440	7.6719e-14	-0.356587	FDR1%	0.0761673	0.0377061	ns	less syn	0.0001204	-0.158064	FDR1%	0.118011	0.0318535	ns	less syn
4664	P11730;P11730-3;P11730-2	Calcium/calmodulin-dependent protein kinase type II subunit gamma	Camk2g	0.00259638	-0.355753	FDR1%	0.0933505	-0.0266752	ns	less syn	0.000324341	0.310315	FDR1%	5.67754e-10	0.235849	FDR1%	more syn & less deg
3035	D4A8V2		Ccdc177	0.000185055	-0.355649	FDR1%	0.0211719	-0.108292	ns	less syn	0.0384566	-0.16886	ns	0.930231	0.0740463	ns	unchanged
6719	Q6QIX3;Q6QIX3-2	Zinc transporter 3	Slc30a3	0.00111211	-0.355153	FDR1%	0.571988	0.0093861	ns	less syn	8.57154e-14	-1.00586	FDR1%	0.852964	-0.0308834	ns	less syn
5077	P62813	Gamma-aminobutyric acid receptor subunit alpha-1	Gabra1	0.0232884	-0.13571	ns	0.0532476	0.173452	ns	unchanged	0.000579662	-0.497458	FDR1%	0.0440993	-0.114379	ns	less syn
7009	Q9ES73	Melanoma-associated antigen D1	Maged1	0.44828	-0.0453471	ns	0.392964	0.0911542	ns	unchanged	0.194883	0.125679	ns	0.00133465	0.266063	FDR1%	less deg
6316	Q64244	ADP-ribosyl cyclase/cyclic ADP-ribose hydrolase 1	Cd38	0.544177	-0.161207	ns	0.576177	0.060261	ns	unchanged	0.121334	-0.278178	ns	0.41893	0.0128387	ns	unchanged
5226	P97829-2;A0A0G2JTH4;P97829	Leukocyte surface antigen CD47	Cd47	0.0687123	-0.215809	ns	0.785586	-0.0210643	ns	unchanged	0.192963	-0.115023	ns	0.0472823	0.0310159	ns	unchanged
2425	D3ZSA9		Nomo1	0.12854	-0.0605243	ns	6.56466e-05	0.0951175	FDR1%	less deg	0.11403	-0.0843278	ns	0.220739	-0.000568445	ns	unchanged
6685	Q6P9V1;Q62745	Tetraspanin;CD81 antigen	Cd81	0.416539	0.0989135	ns	0.393455	0.0709873	ns	unchanged	0.104539	-0.0804631	ns	0.129549	0.0151444	ns	unchanged
187	A0A0G2JTS3;B2RZ78;B2RZ78-2	Vacuolar protein sorting-associated protein 29	Vps29	5.0071e-07	-0.366388	FDR1%	0.000103748	0.0956699	FDR1%	slower turnover	0.00260581	-0.173571	ns	0.00490786	0.0919744	ns	unchanged
4833	P31044	Phosphatidylethanolamine-binding protein 1;Hippocampal cholinergic neurostimulating peptide	Pebp1	0.0627189	-0.111932	ns	1.13854e-05	0.0967183	FDR1%	less deg	0.175288	0.0883356	ns	5.22967e-14	0.215966	FDR1%	less deg
6281	Q63692;A0A140TAG9;A0A0G2K3C1	Hsp90 co-chaperone Cdc37;Hsp90 co-chaperone Cdc37, N-terminally processed	Cdc37	0.398794	-0.123045	ns	0.0483131	0.106546	ns	unchanged	0.449163	-0.0763982	ns	0.0482099	0.129766	ns	unchanged
1166	A0A5D0		Cd200	NA	NA	NA	NA	NA	NA	NA	0.66833	-0.123045	ns	0.000174615	0.178354	FDR1%	less deg
6857	Q8CFN2	Cell division control protein 42 homolog	Cdc42	0.877681	-0.0888659	ns	0.0691275	0.161219	ns	unchanged	0.639145	0.0506823	ns	0.210076	0.13189	ns	unchanged
4084	G3V8A5;B5DFC1		Vps35	2.82437e-09	-0.206756	FDR1%	1.03278e-06	0.0982186	FDR1%	slower turnover	0.266618	-0.0376886	ns	0.0248756	0.0649954	ns	unchanged
3113	D4ABK1		Syngr3	4.91026e-06	-0.352565	FDR1%	0.139405	-0.0261423	ns	less syn	2.03981e-05	-0.270599	FDR1%	0.0110312	0.0743538	ns	less syn
3457	F1LRQ6		Cdc23	0.0938466	-0.108183	ns	0.34968	0.0941392	ns	unchanged	0.355774	0.0995249	ns	0.136306	0.0789555	ns	unchanged
1390	B1WBQ0;O08837	Cell division cycle 5-like protein	Cdc5l	0.0713977	-0.117422	ns	0.149056	-0.00516649	ns	unchanged	0.404712	-0.0314309	ns	0.421288	-0.0266032	ns	unchanged
3828	F2Z3T0;Q4V8C8	Parafibromin	Cdc73	0.727073	-0.0386909	ns	0.018645	0.0827316	ns	unchanged	NA	NA	NA	NA	NA	NA	NA
1424	B1WC33		Cdc42ep4	0.0963469	-0.22757	ns	0.222512	-0.151061	ns	unchanged	0.0955888	-0.282917	ns	0.286116	0.0614108	ns	unchanged
5123	P63102;A0A0G2JV65	14-3-3 protein zeta/delta	Ywhaz	1.14555e-11	-0.351694	FDR1%	0.28465	-0.000374344	ns	less syn	0.012552	-0.114412	ns	0.000419962	0.099553	FDR1%	less deg
6894	Q8R490;F1M7X3		Cdh13	0.0170494	0.103993	ns	0.0730655	0.08361	ns	unchanged	6.51215e-07	-0.424886	FDR1%	0.445694	0.0375345	ns	less syn
3416	F1LQP8;Q9JIW1		Cdh6	0.769091	-0.0193689	ns	0.529488	0.0185021	ns	unchanged	0.0829167	-0.0244511	ns	0.960301	0.0155581	ns	unchanged
6443	Q68G39;A0A140UHY2		Cdk16	0.247795	-0.11867	ns	0.00287695	0.0934656	ns	unchanged	NA	NA	NA	NA	NA	NA	NA
5156	P70500	CDP-diacylglycerol--inositol 3-phosphatidyltransferase	Cdipt	0.10967	-0.129035	ns	0.233404	0.184134	ns	unchanged	0.136546	-0.174592	ns	0.941789	0.0368715	ns	unchanged
2106	D3ZG85;E2E1S0		Cdkl5	NA	NA	NA	NA	NA	NA	NA	0.0120234	-0.234822	ns	0.128233	-0.075771	ns	unchanged
5261	Q03114	Cyclin-dependent-like kinase 5	Cdk5	0.0372071	-0.26022	ns	0.0599687	0.133326	ns	unchanged	0.757528	-0.0478475	ns	0.0362957	0.117505	ns	unchanged
6325	Q642E3;Q9JLH7;D4A1S2	CDK5 regulatory subunit-associated protein 3	Cdk5rap3;Prdm1	0.757148	-0.103064	ns	0.514352	0.0938199	ns	unchanged	0.0631404	-0.147288	ns	0.0105407	-0.120685	ns	unchanged
2368	D3ZQB6		Cecr5	0.364707	-0.0798415	ns	0.0682781	0.0197401	ns	unchanged	0.0351998	0.122794	ns	0.706308	-0.0112677	ns	unchanged
4777	P21816	Cysteine dioxygenase type 1	Cdo1	0.608724	-0.0161614	ns	0.0346662	0.134523	ns	unchanged	0.848247	0.0632517	ns	0.423887	0.0337906	ns	unchanged
908	A0A0G2K9C5;A1L1I3;Q3MUI2	Numb-like protein	Numbl	3.02843e-05	-0.351113	FDR1%	0.119664	-0.050065	ns	less syn	1.7896e-05	0.37311	FDR1%	0.00013074	0.246463	FDR1%	more syn & less deg
4141	G3V8W2;Q91XU8	Phosphatidate cytidylyltransferase;Phosphatidate cytidylyltransferase 2	Cds2	0.0683617	-0.152311	ns	0.0864948	0.15217	ns	unchanged	0.0520078	-0.216192	ns	0.409785	-0.0659489	ns	unchanged
496	A0A0G2K0B0;Q5XIM5;Q6QI67	Protein CDV3 homolog	Cdv3;LOC499235	0.38482	-0.142832	ns	0.0840578	-0.0562865	ns	unchanged	0.000613567	0.170752	FDR1%	0.165795	0.106584	ns	more syn
6303	Q641X3	Beta-hexosaminidase subunit alpha	Hexa	0.387713	0.150622	ns	0.000447602	0.0983387	FDR1%	less deg	0.898392	-0.0469089	ns	4.64942e-05	0.15167	FDR1%	less deg
4754	Q5U330;Q8CJD2;P19686	Guanylate cyclase soluble subunit alpha-3	Gucy1a3	0.0125296	-0.169747	ns	0.213753	0.127922	ns	unchanged	7.22535e-06	-0.488656	FDR1%	0.0911453	0.133484	ns	less syn
1793	C0JPT7		Flna	2.19341e-07	0.186864	FDR1%	0.000893229	0.0985866	FDR1%	more syn & less deg	0.115903	0.0203578	ns	0.00450276	0.0931619	ns	unchanged
4114	G3V8P3;Q80Z62;Q9QYP2	Cadherin EGF LAG seven-pass G-type receptor 2	Celsr2	NA	NA	NA	NA	NA	NA	NA	0.41578	-0.0941763	ns	0.184187	-0.0221328	ns	unchanged
1790	B7X6I3;Q5FVI4	Cell cycle exit and neuronal differentiation protein 1	Cend1	0.0687307	-0.261514	ns	0.822168	-0.00943277	ns	unchanged	0.154968	-0.181623	ns	0.354132	-0.015012	ns	unchanged
3048	D4A9A3		Cenpv	0.341635	-0.130344	ns	0.115689	0.0626254	ns	unchanged	0.487379	-0.0711588	ns	0.0123432	0.0819639	ns	unchanged
5049	P62138;A0A0G2JYS8	Serine/threonine-protein phosphatase PP1-alpha catalytic subunit	Ppp1ca	3.33318e-06	-0.349621	FDR1%	0.556913	0.0596513	ns	less syn	0.444367	0.0836008	ns	0.858535	0.117019	ns	unchanged
280	A0A0G2JVR9;Q4FZU8	Protein FAM65A	Fam65a	0.0701162	-0.19194	ns	0.0600058	0.11032	ns	unchanged	0.812098	-0.00946666	ns	0.000959048	0.261182	FDR1%	less deg
6592	Q6IN15;F1LPB3;O88813	Long-chain-fatty-acid--CoA ligase 5	Acsl5	5.41791e-09	-0.349599	FDR1%	0.0151488	0.122133	ns	less syn	0.69574	-0.00412792	ns	0.499205	0.00331205	ns	unchanged
4423	O35274;B1H262	Neurabin-2	Ppp1r9b	9.02539e-11	-0.349088	FDR1%	0.628803	-0.0375184	ns	less syn	0.300734	-0.0492704	ns	0.201871	-0.0422723	ns	unchanged
5231	P97878	Exocyst complex component 5	Exoc5	0.000737263	-0.213305	FDR1%	0.000136405	0.100588	FDR1%	slower turnover	0.143131	-0.0965719	ns	0.0284066	0.061178	ns	unchanged
3411	F1LQI6		Zer1	0.000114839	-0.348922	FDR1%	0.083136	0.209961	ns	less syn	0.297881	-0.0478849	ns	0.105634	0.072307	ns	unchanged
2131	D3ZH41		Ckap4	0.763344	0.0647945	ns	2.04089e-06	0.100884	FDR1%	less deg	0.00501014	-0.270167	ns	0.178735	-0.0347244	ns	unchanged
384	A0A0G2JY08	Submitted name: Myosin XVIIIa	Myo18a	0.000670747	-0.348672	FDR1%	0.664754	0.0323063	ns	less syn	0.265118	0.13476	ns	0.753975	-0.00939349	ns	unchanged
2991	D4A7N1	MICOS complex subunit Mic25	Chchd6	0.135946	-0.166519	ns	0.647067	0.01814	ns	unchanged	0.808022	-0.134132	ns	0.309692	-0.00977644	ns	unchanged
4360	M0RC65		Cfl2	0.462572	0.0065292	ns	0.540157	-0.0081687	ns	unchanged	2.23122e-08	-0.488445	FDR1%	0.0117854	-0.0563492	ns	less syn
6738	Q6UPE0;Q64644	Choline dehydrogenase, mitochondrial	Chdh;RRCHDH	0.112367	0.162304	ns	0.295771	0.0667541	ns	unchanged	0.469243	-0.193275	ns	0.846109	-0.0423738	ns	unchanged
3525	F1LUT4;A0A0G2KAZ5	Phospholipid-transporting ATPase	Atp8a1	2.31295e-08	-0.166076	FDR1%	0.000270853	0.101012	FDR1%	slower turnover	0.474539	0.0456226	ns	9.04907e-34	0.308585	FDR1%	less deg
2525	D3ZUX5		Chchd3	0.0153665	-0.197087	ns	0.795903	-0.0171519	ns	unchanged	0.00146695	-0.2347	FDR1%	0.0487609	-0.0395018	ns	less syn
133	A0A0G2JSR1;Q7TP14;A0JPQ9	Chitinase domain-containing protein 1	Chid1	0.0882751	-0.13921	ns	0.308912	-0.0468496	ns	unchanged	0.00752101	-0.160475	ns	0.292958	-0.0135859	ns	unchanged
4457	O54783	Choline/ethanolamine kinase	Chkb	0.0326553	-0.253035	ns	0.684228	0.0568925	ns	unchanged	0.357777	-0.0892679	ns	0.929539	0.138384	ns	unchanged
3354	F1LNZ5;P20236	Gamma-aminobutyric acid receptor subunit alpha-3	Gabra3	NA	NA	NA	NA	NA	NA	NA	3.21532e-05	-0.478474	FDR1%	0.0534747	-0.118058	ns	less syn
1677	B5DEH2	Erlin-2	Erlin2	0.0684551	-0.0180844	ns	5.56149e-06	0.101248	FDR1%	less deg	0.230679	-0.0477117	ns	0.0239587	-0.0572778	ns	unchanged
3279	E9PU01		Chd4	0.00532398	-0.208669	ns	0.0168374	0.280179	ns	unchanged	0.180991	0.0617581	ns	0.882255	0.0555071	ns	unchanged
3922	G3V6I9;D4A1Z2;D4AE42;P12749;D3ZSF2	60S ribosomal protein L26	Rpl26;Rpl26-ps2;Rpl26-ps1;LOC688981	0.683678	-0.00209104	ns	1.81616e-08	0.102278	FDR1%	less deg	0.00014857	-0.100764	FDR1%	0.00217069	-0.139883	ns	less syn
5557	Q4QQV8	Charged multivesicular body protein 5	Chmp5	0.199634	-0.0445209	ns	0.842402	0.0822614	ns	unchanged	0.642685	0.0559474	ns	0.785024	0.107704	ns	unchanged
4357	M0RC17;O88524		Chl1	0.0199328	-0.00356192	ns	0.0513647	0.109359	ns	unchanged	0.000560288	-0.138155	FDR1%	0.0097615	0.0971834	ns	less syn
6407	Q68FQ0;Q6B436	T-complex protein 1 subunit epsilon	Cct5	2.19052e-05	-0.136472	FDR1%	2.02863e-08	0.102638	FDR1%	slower turnover	0.40326	-0.0123131	ns	0.511933	0.0223787	ns	unchanged
4750	P19527		Nefl	2.81414e-19	-0.348618	FDR1%	0.00267957	-0.0355242	ns	less syn	5.06394e-35	-0.50581	FDR1%	0.00681613	-0.00612442	ns	less syn
2883	D4A4T9	Cysteine and histidine-rich domain-containing protein 1	Chordc1	0.00301586	-0.190051	ns	0.0235714	0.108903	ns	unchanged	0.108322	-0.0514421	ns	0.327931	0.0707934	ns	unchanged
5939	Q5RK10;P35427;A0A1W2Q6L2	60S ribosomal protein L13a	Rpl13a	0.990036	-0.0190962	ns	4.0325e-05	0.102696	FDR1%	less deg	0.531712	-0.0709974	ns	0.0154308	-0.115386	ns	unchanged
4300	M0R868	Sulfotransferase	Chst2	0.392677	-0.00562571	ns	0.037567	0.374131	ns	unchanged	0.353412	-0.0814686	ns	0.81273	-0.0421761	ns	unchanged
4373	M0RDD7;Q498T2-2;Q498T2	Chromatin target of PRMT1 protein	Chtop	0.365988	-0.118282	ns	0.425277	0.0434528	ns	unchanged	0.0747033	-0.0653751	ns	0.382124	0.0617785	ns	unchanged
5129	P63245;A0A0G2JZE6;A0A0G2JY24	Guanine nucleotide-binding protein subunit beta-2-like 1;Guanine nucleotide-binding protein subunit beta-2-like 1, N-terminally processed	Gnb2l1	0.102206	-0.0591373	ns	2.51362e-07	0.103095	FDR1%	less deg	1.99208e-08	-0.157842	FDR1%	6.14697e-10	-0.206888	FDR1%	less syn & more deg
736	A0A0G2K5D5;D3ZMS4		Arhgap26	6.75013e-06	-0.34749	FDR1%	0.00779424	0.11343	ns	less syn	1.45493e-12	-0.534807	FDR1%	0.000234107	-0.101655	FDR1%	less syn & more deg
4363	M0RCH6;D4A9Z8		Chmp4b;Chmp4bl1	0.424722	0.0156498	ns	0.00352736	0.194471	ns	unchanged	0.0269904	0.211987	ns	0.30353	0.139543	ns	unchanged
2021	D3ZDR2		Chmp6	0.0504015	-0.195822	ns	0.810015	0.0152601	ns	unchanged	0.262702	-0.111561	ns	0.0698665	0.0846547	ns	unchanged
4574	P06761	78 kDa glucose-regulated protein	Hspa5	0.0123083	0.0643762	ns	5.03911e-05	0.103123	FDR1%	less deg	8.44049e-29	-0.224065	FDR1%	2.48914e-06	-0.136321	FDR1%	less syn & more deg
2982	D4A7H9		Chmp7	0.212451	-0.221206	ns	0.853914	0.0211965	ns	unchanged	0.399941	-0.123585	ns	0.420774	0.115576	ns	unchanged
4258	M0R5U4		Adcy9	2.08371e-08	-0.346727	FDR1%	0.138317	0.0596437	ns	less syn	4.9531e-08	0.22321	FDR1%	0.00131516	0.127408	FDR1%	more syn & less deg
5147	P68403-2;P68403;F1LS42;F1LS36;A0A0G2K5Q0;Q6LDV0	Protein kinase C beta type;Protein kinase C	Prkcb	1.72815e-06	-0.345636	FDR1%	0.0581853	0.127109	ns	less syn	0.375779	-0.0618028	ns	0.0249504	0.168916	ns	unchanged
3717	F1M7K7;Q8VHW5	Voltage-dependent calcium channel gamma subunit;Voltage-dependent calcium channel gamma-8 subunit	Cacng8	8.11066e-05	-0.345527	FDR1%	0.107727	0.0391798	ns	less syn	0.29267	-0.0892848	ns	0.0125257	0.12278	ns	unchanged
3239	E2RUH2;A0A0G2K9E0;P29315	Ribonuclease inhibitor	Rnh1	0.676081	-0.0458462	ns	0.000635068	0.103477	FDR1%	less deg	0.195184	0.0187857	ns	0.00226414	0.0935428	ns	unchanged
6671	Q6P792;Q9WUH4;A0A0G2K338;Q8K3G3	Four and a half LIM domains protein 1	Fhl1	0.0325885	-0.0665018	ns	0.00206339	0.103669	FDR1%	less deg	7.16601e-14	0.464616	FDR1%	4.67162e-06	0.229727	FDR1%	more syn & less deg
4956	P51799	H(+)/Cl(-) exchange transporter 7	Clcn7	0.690772	-0.0139065	ns	0.66659	0.0674962	ns	unchanged	0.882079	0.0490767	ns	0.648464	0.0276471	ns	unchanged
952	A0A0G2KA14	Submitted name: C-type lectin domain-containing 16A	Clec16a	0.221215	-0.206399	ns	0.151787	0.0652023	ns	unchanged	0.656323	-0.144898	ns	0.201447	0.0407396	ns	unchanged
5316	Q0ZCA7;A0A0H2UI15;B1WBM7	C-type lectin domain family 2 member L	Clec2l	0.819687	-0.0042603	ns	0.0325102	0.167122	ns	unchanged	0.215165	-0.257664	ns	0.311253	0.167323	ns	unchanged
1609	B2RZA2;M0R8C5;A0A1B0GWR1		Eri3	0.00322685	-0.116667	ns	0.00165561	0.10388	FDR1%	less deg	0.0464143	-0.133073	ns	0.261156	0.0436833	ns	unchanged
321	A0A0G2JWM2;Q5RJQ4	NAD-dependent protein deacetylase sirtuin-2	Sirt2	0.121121	0.0625584	ns	0.00210871	0.104533	FDR1%	less deg	0.69309	0.0115401	ns	0.0126375	0.0719423	ns	unchanged
6569	Q6DGF2		Clint1	0.196179	-0.085208	ns	0.809989	0.0637365	ns	unchanged	0.793125	-0.0489776	ns	0.489205	-0.0164184	ns	unchanged
6689	Q6P9X1;Q04753	Methylosome subunit pICln	Clns1a	0.121263	-0.121213	ns	0.115289	0.0378294	ns	unchanged	0.0817383	-0.109873	ns	0.251943	0.0555075	ns	unchanged
4391	O08662;A0A140TAJ5;Q78E76	Phosphatidylinositol 4-kinase alpha	Pi4ka	3.29623e-10	-0.172696	FDR1%	4.20146e-06	0.105699	FDR1%	slower turnover	1.52507e-10	-0.155332	FDR1%	0.817961	0.0186207	ns	less syn
3807	F1MAH8;Q9JK25;A0A0G2K681;Q4V8P6;A0A0G2JTX8;Q5G6W1		Clip1;Rsn	0.011007	-0.170198	ns	0.23796	0.0944803	ns	unchanged	0.657034	-0.0439701	ns	0.451543	0.0778918	ns	unchanged
4934	P49803;D3ZWG2	Regulator of G-protein signaling 7	Rgs7	0.433933	-0.116217	ns	0.0914857	0.0362693	ns	unchanged	4.5684e-07	-0.464927	FDR1%	0.0287909	0.0533583	ns	less syn
5330	Q1JU68;Q4G020	Eukaryotic translation initiation factor 3 subunit A	Eif3a	0.00287325	-0.110444	FDR1%	0.00033926	0.108145	FDR1%	slower turnover	9.66056e-08	-0.10632	FDR1%	0.00116823	-0.218265	FDR1%	less syn & more deg
3467	F1LRZ7;P16884	Neurofilament heavy polypeptide	Nefh	0.0793669	-0.156941	ns	0.0131671	-0.0394578	ns	unchanged	3.67105e-13	-0.462068	FDR1%	0.175881	0.0741301	ns	less syn
4597	Q5PPP1;P08081-2	Clathrin light chain A	Clta	0.394652	0.0797768	ns	0.141858	0.0824529	ns	unchanged	0.940334	0.0161185	ns	0.231905	0.0934018	ns	unchanged
2892	D4A507		Clip3	0.406436	0.0132804	ns	0.00295103	0.211434	ns	unchanged	0.17356	0.0690677	ns	0.00291994	0.152886	ns	unchanged
6895	Q8R491;A0A0G2JTH6	EH domain-containing protein 3	Ehd3	0.00470309	-0.207103	ns	0.0245925	0.0478065	ns	unchanged	1.71801e-14	-0.457961	FDR1%	0.0233157	0.0793134	ns	less syn
4067	Q6P7S6;G3V836;P05371;Q9ERD1;O35510;A0A0G2KB42	Clusterin;Clusterin beta chain;Clusterin alpha chain	Clu	0.00636304	0.244675	ns	0.148002	0.148705	ns	unchanged	0.0031024	-0.206917	ns	0.383533	-0.00998985	ns	unchanged
1095	A0A0U1RRV5;D3ZKG9	Clustered mitochondria protein homolog	Cluh	0.010897	-0.0816491	ns	0.0151478	0.19127	ns	unchanged	0.560994	0.0654658	ns	0.131524	0.105732	ns	unchanged
1103	O55215;O55211;A0A0U1RVI9;P27952;O55212;D3ZIY7;E9PT76;D3ZQW7;M0RAJ8;O55214;A0A0G2KB28;D3ZT78	40S ribosomal protein S2	Rps2-ps6;Rps2;LOC100359960;Gm8225	0.719342	-0.0125896	ns	0.000306265	0.10875	FDR1%	less deg	0.00443782	-0.0909086	ns	0.0648664	-0.131209	ns	unchanged
4209	G3V9Y1;Q9JLT0;Q62707;Q62706;Q9R0H1;Q62705;P70620	Myosin-10	Myh10	3.4365e-06	-0.146013	FDR1%	2.90892e-10	0.108875	FDR1%	slower turnover	0.000156699	-0.158287	FDR1%	1.06395e-21	0.134238	FDR1%	slower turnover
4333	M0RAD5		Clpp	0.0305333	-0.139517	ns	0.190153	0.0477449	ns	unchanged	0.0369761	-0.137678	ns	0.986438	0.0181309	ns	unchanged
803	A0A0G2K724;Q4G009	Malignant T-cell-amplified sequence 1	Mcts1	0.226708	-0.105183	ns	0.207043	0.115955	ns	unchanged	0.196398	0.0344702	ns	0.000192902	0.258696	FDR1%	less deg
1515	B2RYF6		Clptm1	0.00300274	-0.0977941	ns	0.00991403	0.177487	ns	unchanged	3.15588e-05	-0.12419	FDR1%	0.581765	-0.0854613	ns	less syn
5068	P62634	Cellular nucleic acid-binding protein	Cnbp	0.275116	-0.0377044	ns	0.0233724	0.163989	ns	unchanged	0.623796	0.00835827	ns	0.121434	0.0831556	ns	unchanged
6710	Q6Q0N1	Cytosolic non-specific dipeptidase	Cndp2	0.224483	-0.114707	ns	0.00404875	0.10482	ns	unchanged	0.753658	-0.0209522	ns	0.0377284	0.133574	ns	unchanged
4987	P55053;Q2XTA4	Fatty acid-binding protein, epidermal	Fabp5	0.866619	-0.0252571	ns	0.0381694	0.0676627	ns	unchanged	1.00562e-13	-0.457162	FDR1%	0.0497093	0.135376	ns	less syn
4882	P37397	Calponin-3	Cnn3	0.159719	0.00937393	ns	0.0472524	0.0719329	ns	unchanged	0.16726	0.0311551	ns	0.0263358	0.135973	ns	unchanged
5985	Q5U2P1	Metal transporter CNNM2	Cnnm2	0.41924	-0.127193	ns	0.0297235	0.0803556	ns	unchanged	0.464353	-0.217173	ns	0.117053	0.0989281	ns	unchanged
2469	D3ZTN2		Cmc1	0.114277	-0.120931	ns	0.588423	-0.00805751	ns	unchanged	0.601239	-0.0563286	ns	0.0459971	-0.0551914	ns	unchanged
1969	D3ZC63		Cmpk2	0.46145	-0.0500117	ns	0.596776	-0.0356069	ns	unchanged	0.125535	-0.201776	ns	0.920677	-0.110043	ns	unchanged
3148	D4ACK7		Cnnm3	0.386789	-0.104425	ns	0.296316	0.100541	ns	unchanged	0.0245387	0.110218	ns	0.0275266	0.255348	ns	unchanged
5098	P62963	Profilin-1	Pfn1	3.04673e-05	-0.21292	FDR1%	2.80755e-05	0.110204	FDR1%	slower turnover	0.789023	0.0330974	ns	5.15815e-10	0.205893	FDR1%	less deg
2726	D4A0E8	Protein arginine N-methyltransferase 5	Prmt5	0.0184324	-0.183878	ns	0.00010228	0.110417	FDR1%	less deg	0.464492	0.081019	ns	9.52964e-05	0.133867	FDR1%	less deg
6412	Q68FR6	Elongation factor 1-gamma	Eef1g	0.176615	0.0545485	ns	0.000463614	0.110423	FDR1%	less deg	0.0273565	-0.10907	ns	0.76123	0.0113648	ns	unchanged
3023	D4A8H3		Uba6	0.337628	-0.0986495	ns	0.000814609	0.110462	FDR1%	less deg	0.37659	-0.0929652	ns	0.612174	0.00248751	ns	unchanged
5822	Q5M7A7;A0A0G2K1I5	CB1 cannabinoid receptor-interacting protein 1	Cnrip1	0.103445	-0.173056	ns	0.748105	0.0452376	ns	unchanged	0.240246	0.079088	ns	0.0210638	0.155342	ns	unchanged
4322	M0R9L2;Q08406	Ciliary neurotrophic factor receptor subunit alpha	Cntfr	0.141126	-0.0740868	ns	0.782829	0.0853644	ns	unchanged	0.0747916	0.0770393	ns	0.111553	0.082036	ns	unchanged
4677	P12839;G3V7S2	Neurofilament medium polypeptide	Nefm	2.0966e-18	-0.343356	FDR1%	0.105188	-0.0745717	ns	less syn	2.1268e-35	-0.524809	FDR1%	0.000722259	-0.0745479	FDR1%	less syn & more deg
3986	G3V758;P22063	Contactin-2	Cntn2	NA	NA	NA	NA	NA	NA	NA	1.65603e-13	0.669451	FDR1%	0.00187986	0.303351	ns	more syn
1362	B0VXR5;Q9R237-2;Q9R237;Q9R237-3	C-Jun-amino-terminal kinase-interacting protein 1	Mapk8ip1	0.000171423	-0.342794	FDR1%	0.331586	0.0631386	ns	less syn	NA	NA	NA	NA	NA	NA	NA
6863	Q8CGU6;B3DM90	Nicastrin	Ncstn	0.102908	-0.0531007	ns	0.00165844	0.110586	FDR1%	less deg	0.443578	0.0377888	ns	0.050016	0.0680449	ns	unchanged
6033	Q5U3Z7	Serine hydroxymethyltransferase	Shmt2	0.00894036	0.0566752	ns	0.000804633	0.110636	FDR1%	less deg	4.22264e-10	-0.242003	FDR1%	0.0906342	-0.0652846	ns	less syn
2523	D3ZUV9		Cnot3	0.0839043	-0.19731	ns	0.960534	0.0457203	ns	unchanged	0.548546	-0.160882	ns	0.366839	-0.0817353	ns	unchanged
3318	F1LMV9;Q5EB67	Coronin	Coro2b	2.16258e-12	-0.341968	FDR1%	0.874739	0.0732646	ns	less syn	4.86654e-06	0.31573	FDR1%	0.362768	0.010708	ns	more syn
1517	G3V828;B2RYF8		Cnpy3	0.0388346	-0.0601911	ns	0.602302	0.0287404	ns	unchanged	0.000486548	-0.188737	FDR1%	0.00314917	-0.295892	ns	less syn
3660	F1M3J7;A0A0G2K6L9		Cntnap4	0.838159	-0.0387188	ns	0.0134711	0.13052	ns	unchanged	2.41244e-14	-0.799798	FDR1%	0.522993	-0.0862544	ns	less syn
3939	G3V6P7;Q62812	Myosin-9	LOC100911597;Myh9	9.24106e-06	-0.102422	FDR1%	6.47369e-05	0.110833	FDR1%	slower turnover	0.00600056	0.0906904	ns	0.00373967	0.0787109	ns	unchanged
7004	Q9ERR2;G3V6K0	COMM domain-containing protein 5	Commd5	0.893828	-0.048368	ns	0.597469	0.0264027	ns	unchanged	0.816685	0.0232532	ns	0.802844	0.104715	ns	unchanged
3136	D4AC65		Coa7	0.150198	-0.26913	ns	0.437329	-0.0713075	ns	unchanged	0.572468	0.0406953	ns	0.336872	-0.0417426	ns	unchanged
6089	Q5XIA5		Coasy	0.279037	-0.132392	ns	0.0439659	0.0830945	ns	unchanged	0.980576	-0.0404848	ns	0.00395746	0.133327	ns	unchanged
4564	P05712	Ras-related protein Rab-2A	Rab2a	8.51388e-08	-0.258081	FDR1%	0.000626513	0.110921	FDR1%	slower turnover	0.000400646	-0.112837	FDR1%	0.727887	0.000652619	ns	less syn
2267	D3ZLN7		Commd2	0.0512287	-0.160974	ns	0.14869	0.0987581	ns	unchanged	0.797698	0.051554	ns	0.826335	0.0851411	ns	unchanged
787	A0A0G2K6N9;D4A2Q7		Commd4	0.0123809	-0.187383	ns	0.203621	0.0680193	ns	unchanged	0.731399	0.0655889	ns	0.210701	0.075815	ns	unchanged
5478	Q499V0		Commd7	0.523773	-0.0331773	ns	0.652949	0.0807688	ns	unchanged	0.294556	0.0888447	ns	0.495479	0.0683874	ns	unchanged
5415	Q3MIE7;B3SVE6		Commd9	0.122835	-0.0953823	ns	0.44656	0.106831	ns	unchanged	0.562582	-0.0644914	ns	0.134638	0.0720228	ns	unchanged
4952	P51635	Alcohol dehydrogenase [NADP(+)]	Akr1a1	0.0650788	-0.103822	ns	1.02074e-05	0.111156	FDR1%	less deg	1.33034e-10	0.399804	FDR1%	4.96381e-17	0.259685	FDR1%	more syn & less deg
7041	Q9JJ31;A0A0H2UHG3	Cullin-5	Cul5	0.00016949	-0.224952	FDR1%	4.66472e-06	0.111266	FDR1%	slower turnover	0.00478423	0.15347	ns	1.19005e-08	0.15055	FDR1%	less deg
5029	P61203;P61203-2	COP9 signalosome complex subunit 2	Cops2	0.0111851	-0.159768	ns	0.431979	0.0770795	ns	unchanged	0.618765	-0.0555702	ns	0.00213628	0.119789	ns	unchanged
6430	Q68FW9	COP9 signalosome complex subunit 3	Cops3	0.0343469	-0.150751	ns	0.0417434	0.0775017	ns	unchanged	0.402416	-0.0142306	ns	0.0105781	0.127867	ns	unchanged
5973	Q5U204	Ragulator complex protein LAMTOR3	Lamtor3	0.0467002	-0.106382	ns	0.000450091	0.111778	FDR1%	less deg	0.589172	-0.0627934	ns	0.000149132	0.14045	FDR1%	less deg
2281	D3ZM21		Comtd1	0.0356538	-0.18439	ns	0.0355083	0.0489729	ns	unchanged	0.356933	-0.0410368	ns	0.0307396	0.102534	ns	unchanged
6079	Q5XI77;D3ZHD1	Annexin	Anxa11;Anxa13	7.23425e-06	-0.340769	FDR1%	0.149374	0.0290914	ns	less syn	0.0145658	-0.14951	ns	0.190013	0.0631811	ns	unchanged
4119	G3V8Q1;B1WBX7;A0A0U1RRT4		Cope	0.0886313	-0.106446	ns	0.0038084	0.165582	ns	unchanged	0.030707	-0.156594	ns	0.0595249	-0.216422	ns	unchanged
6645	Q6P4Z9	COP9 signalosome complex subunit 8	Cops8	0.057353	-0.145581	ns	0.0218798	0.0425564	ns	unchanged	0.710174	-0.0317891	ns	0.0248367	0.140077	ns	unchanged
3932	G3V6M3;P29101	Synaptotagmin-2	Syt2	0.011953	-0.253053	ns	0.119025	-0.114691	ns	unchanged	0.000665135	-0.45118	FDR1%	0.62648	0.00847388	ns	less syn
5503	Q4G082;Q63159	Ubiquinone biosynthesis O-methyltransferase, mitochondrial	Coq3	0.603308	0.0274253	ns	0.84644	0.0277111	ns	unchanged	0.0133626	0.25784	ns	0.291621	0.0323669	ns	unchanged
5499	Q4G064	2-methoxy-6-polyprenyl-1,4-benzoquinol methylase, mitochondrial	Coq5	0.0366373	-0.118767	ns	0.676088	0.0592468	ns	unchanged	0.419988	-0.0535139	ns	0.493278	-0.00664904	ns	unchanged
6425	Q68FU7	Ubiquinone biosynthesis monooxygenase COQ6, mitochondrial	Coq6	0.678622	0.0915068	ns	0.129552	0.0939646	ns	unchanged	0.0501646	0.231402	ns	0.696075	0.00799199	ns	unchanged
4078	G3V879;Q63619;A0A0U1RRX6	5-demethoxyubiquinone hydroxylase, mitochondrial	Coq7	0.302181	-0.0725825	ns	0.990023	-0.0336878	ns	unchanged	0.901841	-0.0500245	ns	0.0989946	-0.0354545	ns	unchanged
6420	Q68FT1	Ubiquinone biosynthesis protein COQ9, mitochondrial	Coq9	0.189857	-0.0892963	ns	0.756293	-0.0183204	ns	unchanged	0.507374	0.0869018	ns	0.491646	0.0643683	ns	unchanged
859	A0A0G2K872;Q1WIM3	Cell adhesion molecule 3	Cadm3	6.67306e-12	-0.339579	FDR1%	0.181103	0.120153	ns	less syn	2.19723e-10	0.253189	FDR1%	0.247857	0.153026	ns	more syn
4158	G3V940;O89046;Q920J3	Coronin;Coronin-1B;Coronin-6	Coro1b;Coro6	0.743798	-0.0673594	ns	0.779788	-0.0185491	ns	unchanged	0.109227	-0.116827	ns	0.867727	0.0234023	ns	unchanged
3881	G3V624;B2RYG0	Coronin	Coro1c	0.746342	-0.0201053	ns	0.569557	-0.0123893	ns	unchanged	0.490838	-0.0153462	ns	0.599966	0.00269676	ns	unchanged
6481	Q6AY36;A0A0G2QC56	Coronin	Coro2a	0.334719	-0.104656	ns	0.066715	-0.0775024	ns	unchanged	0.0180711	0.171719	ns	0.266436	0.0811929	ns	unchanged
2165	D3ZI16		Cops6	0.00405499	-0.16244	ns	0.00683148	0.0908357	ns	unchanged	0.877831	-0.043122	ns	9.72291e-05	0.110345	FDR1%	less deg
3798	G3V8Z9;F1MAA2;Q1JU69		Cops7a	0.911564	-0.10195	ns	0.762589	0.134297	ns	unchanged	0.665965	0.072997	ns	0.0281691	0.210204	ns	unchanged
2466	D3ZTK0		Ttc9b	0.000827907	-0.339131	FDR1%	0.944471	0.0795861	ns	less syn	0.00236988	0.408945	ns	0.100079	0.18605	ns	unchanged
3032	D4A8T3		Copz1	0.132879	-0.15129	ns	0.0692265	0.11018	ns	unchanged	0.000601116	-0.24461	FDR1%	0.0392512	-0.223908	ns	less syn
3738	F1M842		Tp53bp1	4.25037e-23	-0.337665	FDR1%	0.251827	0.0333215	ns	less syn	5.98348e-15	-0.208961	FDR1%	0.245959	-0.0416375	ns	less syn
5128	P63170;A0A0G2JU43	Dynein light chain 1, cytoplasmic	Dynll1	0.000510194	-0.337186	FDR1%	0.263889	0.106954	ns	less syn	0.62932	0.0155799	ns	0.368224	0.0774183	ns	unchanged
4168	G3V982;Q5FVI2		Elmo2	4.5047e-06	-0.336839	FDR1%	0.0143266	0.158849	ns	less syn	0.00366268	0.187957	ns	0.00332516	0.152793	ns	unchanged
4671	P12075	Cytochrome c oxidase subunit 5B, mitochondrial	Cox5b	0.0376802	-0.169155	ns	0.113233	-0.0652519	ns	unchanged	0.0017563	-0.207598	FDR1%	0.000351672	-0.148236	FDR1%	less syn & more deg
7086	Q9QXY2-2;Q9QXY2	SRC kinase signaling inhibitor 1	Srcin1	6.36409e-22	-0.336493	FDR1%	0.349628	-0.00811087	ns	less syn	0.339428	0.028457	ns	1.22224e-06	0.142895	FDR1%	less deg
5060	P62329	Thymosin beta-4;Hematopoietic system regulatory peptide	Tmsb4x	0.0138413	-0.337279	ns	0.577807	-0.0022612	ns	unchanged	0.125762	-0.227507	ns	7.10569e-06	0.253957	FDR1%	less deg
4295	M0R809;O35357	Guanine nucleotide-binding protein subunit gamma	Gng4	0.622373	-0.192289	ns	0.833909	-0.0475878	ns	unchanged	8.49181e-05	-0.443548	FDR1%	0.00691933	0.189514	ns	less syn
3316	F1LMU7;F1LNE8;P23576	Gamma-aminobutyric acid receptor subunit alpha-2	Gabra2	0.0004796	-0.336372	FDR1%	0.00887575	0.199466	ns	less syn	0.00222923	-0.27032	ns	0.0920526	-0.163812	ns	unchanged
2413	D3ZRM9;P41123;A0A0G2JYG9;F1M2E9;D3ZD02	60S ribosomal protein L13	LOC100360491;Rpl13;RGD1563145	0.267364	-0.00834095	ns	0.000469424	0.111805	FDR1%	less deg	0.00835525	-0.0679092	ns	0.00840626	-0.11601	ns	unchanged
1043	A0A0H2UHN2;O35760	Isopentenyl-diphosphate Delta-isomerase 1	Idi1	0.012507	-0.255092	ns	0.000165697	0.111913	FDR1%	less deg	1.80932e-13	-0.486112	FDR1%	0.181703	-0.0528814	ns	less syn
6777	Q76MV3		Cox17	0.0153041	-0.222629	ns	0.399782	-0.01436	ns	unchanged	0.00350832	-0.221106	ns	0.69371	-0.000569868	ns	unchanged
6493	Q6AY65	Arfaptin-2	Arfip2	0.0017889	-0.334932	FDR1%	0.0810699	0.0362891	ns	less syn	0.287748	-0.119358	ns	0.307767	0.0527585	ns	unchanged
5111	P63041	Complexin-1	Cplx1	0.407106	-0.169106	ns	0.807342	0.0267449	ns	unchanged	0.0768259	-0.213324	ns	0.00622386	0.182634	ns	unchanged
6336	Q64559-1;F8WG67;Q64559	Cytosolic acyl coenzyme A thioester hydrolase	Acot7	0.0560995	-0.130595	ns	0.000111209	0.112089	FDR1%	less deg	0.155157	0.0534274	ns	0.00679024	0.143613	ns	unchanged
410	A0A0G2JYH7;B0BN10		Sh2d3c	0.000390535	-0.333646	FDR1%	0.0134311	0.134757	ns	less syn	0.00886355	-0.200805	ns	0.772543	0.108193	ns	unchanged
6175	Q62717	Calcium-dependent secretion activator 1	Cadps	0.0959259	-0.159116	ns	0.990717	0.0109112	ns	unchanged	3.18285e-07	-0.437553	FDR1%	0.119499	0.0423149	ns	less syn
4669	P11980	Pyruvate kinase PKM	Pkm	0.000636485	-0.333472	FDR1%	0.108078	0.0260488	ns	less syn	0.0170167	-0.196627	ns	5.86772e-05	0.138654	FDR1%	less deg
2118	D3ZGN2;A0A140TAJ0;Q5BJS7	Copine-9	Cpne5;Cpne9	0.494876	-0.181446	ns	0.112356	-0.111527	ns	unchanged	0.0260468	-0.324379	ns	0.202954	-0.0313129	ns	unchanged
2750	D4A193	Receptor expression-enhancing protein	Reep1	0.00130334	-0.333392	FDR1%	0.014463	0.205483	ns	less syn	0.0855263	-0.181664	ns	0.179545	0.0397967	ns	unchanged
2771	D4A1R8		Cpne1	0.198692	-0.239618	ns	0.365886	0.173108	ns	unchanged	0.326904	-0.100958	ns	0.151597	0.223534	ns	unchanged
1656	B4F7A2;F1M943		Armc8	7.44659e-08	-0.332496	FDR1%	0.0042005	0.137555	ns	less syn	0.011816	-0.149007	ns	0.50948	0.0269048	ns	unchanged
5375	Q3B7D0	Oxygen-dependent coproporphyrinogen-III oxidase, mitochondrial	Cpox	0.0406354	-0.130298	ns	0.589665	0.00175062	ns	unchanged	0.0548163	-0.0925396	ns	0.0144899	-0.0755435	ns	unchanged
4931	P49242;M0R6L4	40S ribosomal protein S3a;40S ribosomal protein S3b	Rps3a;LOC100365839	0.804051	-0.019619	ns	0.000743914	0.112123	FDR1%	less deg	0.227584	-0.0794862	ns	0.00052445	-0.152075	FDR1%	more deg
5104	P63012	Ras-related protein Rab-3A	Rab3a	6.62326e-12	-0.33176	FDR1%	0.0224893	0.0475937	ns	less syn	2.08718e-12	-0.317775	FDR1%	0.0815073	0.0782652	ns	less syn
6059	Q5XI29	Cleavage and polyadenylation specificity factor subunit 7	Cpsf7	NA	NA	NA	NA	NA	NA	NA	0.352525	-0.0969897	ns	0.81628	0.0405822	ns	unchanged
4843	P32198	Carnitine O-palmitoyltransferase 1, liver isoform	Cpt1a	0.520977	0.0302185	ns	0.562211	0.0339037	ns	unchanged	4.55119e-05	0.0992673	FDR1%	0.487263	-0.000416326	ns	more syn
5876	Q5PPH0	Enolase-phosphatase E1	Enoph1	8.93951e-06	-0.331716	FDR1%	0.0751114	0.061933	ns	less syn	0.00114647	-0.291443	FDR1%	0.0440573	0.118046	ns	less syn
6223	Q63135;Q63135-2;A0A0G2K7Y0;O35520;Q9QYQ8	Complement component receptor 1-like protein	Cr1l	0.232051	-0.125876	ns	0.033159	0.0448585	ns	unchanged	0.793199	0.0107542	ns	0.00397134	0.16473	ns	unchanged
5099	P62966	Cellular retinoic acid-binding protein 1	Crabp1	NA	NA	NA	NA	NA	NA	NA	0.0223014	0.240739	ns	0.235054	0.0109273	ns	unchanged
1082	A0A0H2UI21;Q704S8	Carnitine O-acetyltransferase	Crat	0.0190735	-0.16833	ns	0.822216	0.00830386	ns	unchanged	0.0428087	-0.22527	ns	0.000339161	-0.0932521	FDR1%	more deg
5584	Q4V7F2	Cysteine-rich with EGF-like domain protein 1	Creld1	0.00321273	-0.179715	ns	0.00867425	0.165315	ns	unchanged	3.53746e-06	-0.392619	FDR1%	0.000368135	-0.176373	FDR1%	less syn & more deg
5498	Q4G063	Cysteine-rich with EGF-like domain protein 2	Creld2	0.590745	0.149968	ns	0.215823	0.145026	ns	unchanged	0.752471	-0.052223	ns	0.871174	-0.0546538	ns	unchanged
4875	P36201	Cysteine-rich protein 2	Crip2	0.0365443	-0.188414	ns	0.0927697	0.0902362	ns	unchanged	0.000952324	0.310806	FDR1%	0.0514676	0.116039	ns	more syn
1704	B5DEX3		Cpne8	0.559227	0.0196972	ns	0.0927503	0.175754	ns	unchanged	3.55013e-10	-0.809958	FDR1%	0.243188	0.248301	ns	less syn
693	A0A0G2K4C6;F1M5N4	Malic enzyme	Me3	0.00832572	-0.170074	ns	0.602023	0.0010747	ns	unchanged	1.75282e-06	-0.433738	FDR1%	0.844529	0.00927157	ns	less syn
6000	Q5U2U0	ATP-dependent Clp protease ATP-binding subunit clpX-like, mitochondrial	Clpx	1.18568e-05	-0.12337	FDR1%	0.000194381	0.112215	FDR1%	slower turnover	6.38685e-06	-0.106147	FDR1%	0.0342598	-0.0596018	ns	less syn
1686	D4A0H5;B5DEL2		Cpsf1	0.361445	-0.07208	ns	0.0514487	0.151342	ns	unchanged	NA	NA	NA	NA	NA	NA	NA
5326	Q157S1	CREB-regulated transcription coactivator 1	Crtc1	NA	NA	NA	NA	NA	NA	NA	0.0474109	0.339986	ns	0.110159	0.249211	ns	unchanged
2344	D3ZPL1		Cpsf6	0.311134	-0.154136	ns	0.0780828	0.0937843	ns	unchanged	0.919096	-0.0529887	ns	0.164104	0.0346654	ns	unchanged
981	A0A0G2KAW2;Q5JCS7;O35412;F1LS65;A0A0G2K2Z9;D3ZQP5	Signal-induced proliferation-associated 1-like protein 1	Sipa1l1	5.47011e-09	-0.331465	FDR1%	0.270269	-0.00633787	ns	less syn	1.09047e-22	-0.487409	FDR1%	5.91454e-06	-0.150276	FDR1%	less syn & more deg
21	F1LQP7;A0A096MJG4;Q5EB82;A0A096MJM0;Q9QX63		Crtac1	0.757004	0.126879	ns	0.494058	0.0754742	ns	unchanged	0.288257	-0.0472198	ns	0.825343	0.0567188	ns	unchanged
6064	Q5XI39		Cryzl1	0.370599	-0.139953	ns	0.096157	0.0569636	ns	unchanged	0.64442	-0.0769535	ns	0.262979	0.0480157	ns	unchanged
6244	Q63430	Cold shock domain-containing protein C2	Csdc2	0.941386	-0.286624	ns	0.854909	0.193179	ns	unchanged	0.0565123	-0.905716	ns	0.0825423	-0.132457	ns	unchanged
6662	Q6P6T4;Q6P6T4-2	Echinoderm microtubule-associated protein-like 2	Eml2	0.0377283	-0.0702624	ns	0.537884	-0.0184856	ns	unchanged	3.51151e-11	-0.429644	FDR1%	0.839808	0.0171622	ns	less syn
5031	P61227	Ras-related protein Rap-2b	Rap2b	2.05547e-05	-0.331447	FDR1%	0.638707	0.028235	ns	less syn	0.227805	-0.065717	ns	0.000617166	0.0880078	FDR1%	less deg
5181	P83941;A0A0G2K2A0;A0A096MIY6	Transcription elongation factor B polypeptide 1	Tceb1	0.00256662	-0.151347	FDR1%	8.58485e-05	0.112307	FDR1%	slower turnover	0.412961	0.0869376	ns	0.0772421	0.0711585	ns	unchanged
773	A0A0G2K6F2;F1M620		Csmd2	0.0238172	-0.216821	ns	0.0616657	-0.186494	ns	unchanged	0.324115	-0.170579	ns	0.161019	0.0695703	ns	unchanged
6948	Q925Q9;M0RBZ7;Q6IRL5;A0A0H2UHD8;Q925Q9-2;Q925Q9-7;Q925Q9-3;Q925Q9-6;Q925Q9-4;F1LRS8	SH3 domain-containing kinase-binding protein 1;CD2-associated protein	Sh3kbp1;Cd2ap	0.000273641	-0.331022	FDR1%	0.122396	-0.0559504	ns	less syn	0.0597396	0.145345	ns	0.000508222	0.156652	FDR1%	less deg
4879	P36972	Adenine phosphoribosyltransferase	Aprt	0.577884	-0.018918	ns	0.000156298	0.112329	FDR1%	less deg	0.0396691	0.113	ns	2.63377e-06	0.1552	FDR1%	less deg
7044	Q9JJ76;Q99PS2;Q9JJ75		Csnk1e;Ck1e-2;rCK1e-3	NA	NA	NA	NA	NA	NA	NA	0.409528	0.0940339	ns	0.789244	0.105282	ns	unchanged
7143	Q9WVI4;Q8CH90;Q8R5L4;O35798	Guanylate cyclase soluble subunit alpha-2	Gucy1a2	2.12787e-07	-0.330354	FDR1%	0.080956	-0.0751329	ns	less syn	0.00116623	-0.235998	FDR1%	0.164323	0.113387	ns	less syn
2755	D4A1B8		Dctn3	0.0074527	-0.129622	ns	8.26401e-05	0.112705	FDR1%	less deg	0.39509	-0.0787391	ns	0.0499821	0.0944376	ns	unchanged
5140	Q68G11;P67874;N0E4B7;A0A0G2KA61;A0A096MJD3;A0A096MKB7;N0E631	Casein kinase II subunit beta	Csnk2b;Csnk2b-Ly6g5b	0.2309	-0.193009	ns	0.0911939	0.0788826	ns	unchanged	0.728423	-0.013557	ns	0.406438	0.0862978	ns	unchanged
4091	G3V8D0;P97877		St8sia3	1.40497e-05	-0.329801	FDR1%	0.00301908	0.517864	ns	less syn	0.64964	-0.0670953	ns	0.496195	0.0664276	ns	unchanged
3680	F1M4R7;Q9ERQ6;Q9ERQ6-2	Chondroitin sulfate proteoglycan 5	Cspg5	0.00956611	-0.275001	ns	0.985704	-0.0169744	ns	unchanged	0.0741911	-0.169411	ns	0.0937322	-0.0421084	ns	unchanged
4920	P47875	Cysteine and glycine-rich protein 1	Csrp1	0.305182	0.114537	ns	0.0428724	0.124445	ns	unchanged	NA	NA	NA	NA	NA	NA	NA
4703	P14841	Cystatin-C	Cst3	0.0179583	0.173665	ns	0.0422243	0.225034	ns	unchanged	0.904013	0.00210843	ns	0.122014	0.118492	ns	unchanged
4535	P01041	Cystatin-B	Cstb	0.8753	-0.0123685	ns	0.358415	0.0812635	ns	unchanged	0.184228	-0.146748	ns	0.0430583	0.132555	ns	unchanged
5688	Q5BJQ6	Cleavage stimulation factor subunit 1	Cstf1	0.519998	-0.0786913	ns	0.733661	0.085099	ns	unchanged	NA	NA	NA	NA	NA	NA	NA
325_m	B4F7F1;A0A0G2JWP1;A0A0G2K6F9	Submitted name: Cleavage stimulation factor subunit 2	Cstf2	0.759379	0.00723058	ns	0.634566	0.117267	ns	unchanged	0.881258	-0.0427006	ns	0.548251	0.0187827	ns	unchanged
609	D3ZVL1;D3ZHI1;A0A0G2KA58;A0A0G2K2J9;A0A0G2JXM0		Ctage5	0.0955859	-0.0840237	ns	0.730976	0.0516945	ns	unchanged	0.0623383	-0.196397	ns	0.0504812	-0.165593	ns	unchanged
1081	F7FG31;A0A0H2UI20;Q9Z2F5;Q6AZ26	C-terminal-binding protein 1	Ctbp1	0.0760016	-0.17419	ns	0.959206	0.0176901	ns	unchanged	0.800635	-0.0423926	ns	0.0085839	0.0787643	ns	unchanged
6991	Q9EQH5-2;Q9EQH5	C-terminal-binding protein 2	Ctbp2	0.0241714	-0.191924	ns	0.92435	-0.021296	ns	unchanged	0.116959	-0.24189	ns	0.670278	-0.0663589	ns	unchanged
2990	D4A7M0		Plxnc1	1.27863e-06	-0.329558	FDR1%	0.461138	0.0330376	ns	less syn	0.0411946	-0.157296	ns	2.44536e-08	0.151472	FDR1%	less deg
6016	Q5U302;A0A0G2JYF7		Ctnna1	0.282566	0.0335735	ns	0.0232369	-0.0720834	ns	unchanged	0.047074	-0.0636259	ns	0.504273	0.00195925	ns	unchanged
5093	P62919;D4A6W6	60S ribosomal protein L8	Rpl8;RGD1561333	0.868774	-0.00751568	ns	7.1092e-07	0.113218	FDR1%	less deg	0.162531	-0.0440344	ns	9.21184e-05	-0.165121	FDR1%	more deg
4558	P05065;Q6AY07	Fructose-bisphosphate aldolase A;Fructose-bisphosphate aldolase	Aldoa;Aldoart2	6.28893e-14	-0.328403	FDR1%	0.00388324	0.0965294	ns	less syn	0.018929	-0.0897423	ns	0.0174886	0.113683	ns	unchanged
4414	O35112	CD166 antigen	Alcam	0.00707863	-0.164126	ns	0.00180651	0.113248	FDR1%	less deg	1.42641e-17	-0.471853	FDR1%	0.00598424	0.0868999	ns	less syn
5032	P61265	Syntaxin-1B	Stx1b	1.70246e-17	-0.328041	FDR1%	0.899514	0.00294391	ns	less syn	2.09096e-18	-0.383224	FDR1%	0.00019622	0.147038	FDR1%	slower turnover
2709	D3ZZZ9		Ctnnd1	0.0588157	-0.0583071	ns	0.0967026	0.0404399	ns	unchanged	0.101675	-0.0664135	ns	0.834626	0.0281683	ns	unchanged
5079	P62824	Ras-related protein Rab-3C	Rab3c	4.33986e-10	-0.327654	FDR1%	0.254575	0.0345277	ns	less syn	2.38675e-19	-0.667212	FDR1%	0.0132712	0.0681101	ns	less syn
5980	Q5U2N0	CTP synthase 2	Ctps2	0.262402	-0.165151	ns	0.0125923	0.093159	ns	unchanged	0.206167	0.138401	ns	0.23292	0.0726814	ns	unchanged
6552	Q6AYS3		Ctsa	0.27869	-0.0580265	ns	0.739704	-0.00814604	ns	unchanged	0.212053	-0.133474	ns	0.0098586	0.141521	ns	unchanged
5474	Q499S6		Ctsf	0.334243	0.0736203	ns	0.11897	0.165659	ns	unchanged	0.320679	0.0451193	ns	0.0331655	0.19831	ns	unchanged
5169	P80067	Dipeptidyl peptidase 1;Dipeptidyl peptidase 1 exclusion domain chain;Dipeptidyl peptidase 1 heavy chain;Dipeptidyl peptidase 1 light chain	Ctsc	0.30773	0.0529165	ns	0.246467	0.133991	ns	unchanged	0.79502	-0.0656097	ns	0.0261749	0.153568	ns	unchanged
4685	P13264;A0A0G2K1T0	Glutaminase kidney isoform, mitochondrial;Glutaminase kidney isoform 68 kDa chain;Glutaminase kidney isoform 65 kDa chain	Gls	6.98724e-05	-0.326836	FDR1%	0.821549	0.008334	ns	less syn	0.00696791	-0.283404	ns	0.547147	0.00852701	ns	unchanged
1408	B1WBY1		Cul1	0.0256767	-0.21138	ns	0.0918382	0.130503	ns	unchanged	0.998362	0.00632413	ns	0.219063	0.0563254	ns	unchanged
872	A0A0H2UHL6;A0A0G2K8H6;P00786	Pro-cathepsin H;Cathepsin H mini chain;Cathepsin H;Cathepsin H heavy chain;Cathepsin H light chain	Ctsh	0.828618	0.122107	ns	0.670971	0.059568	ns	unchanged	NA	NA	NA	NA	NA	NA	NA
766	A0A0G2K677;Q5BJU8	Histone cluster 1 H1 family member c	Sptbn4	4.50677e-19	-0.326762	FDR1%	0.346062	0.0454428	ns	less syn	0.383342	0.0529163	ns	0.0843496	0.0835307	ns	unchanged
3674	F1M4I4		Vps51	0.051933	-0.138541	ns	0.000934815	0.114234	FDR1%	less deg	0.496732	0.0527458	ns	0.00193225	0.0809766	ns	unchanged
5151	P69897	Tubulin beta-5 chain	Tubb5	0.0467278	-0.149385	ns	1.72813e-05	0.114415	FDR1%	less deg	0.22018	0.0474244	ns	2.40078e-08	0.173268	FDR1%	less deg
6852	Q812E9;Q812E9-2;A0A1B0GWN8	Neuronal membrane glycoprotein M6-a	Gpm6a	5.8403e-10	-0.326646	FDR1%	0.16296	0.0383038	ns	less syn	2.12233e-07	-0.342436	FDR1%	0.127247	0.0809806	ns	less syn
6644	Q6P3V9;P50878	60S ribosomal protein L4	Rpl4	0.126791	-0.0188255	ns	2.34164e-13	0.114695	FDR1%	less deg	0.00430725	-0.0672476	ns	4.04696e-06	-0.126814	FDR1%	more deg
4463	O54924	Exocyst complex component 8	Exoc8	5.44353e-06	-0.22941	FDR1%	1.85303e-05	0.114948	FDR1%	slower turnover	0.0879069	-0.0558807	ns	0.0262574	0.0656223	ns	unchanged
1660	B4F7A9		Csnk2a2	0.000226561	-0.199817	FDR1%	0.000126062	0.114964	FDR1%	slower turnover	2.04789e-08	-0.259387	FDR1%	0.0995518	0.09961	ns	less syn
148	A0A0G2JT00;G3V616;Q6MGD0	Protein CutA	Cuta	0.953274	-0.030989	ns	0.0902772	0.0834539	ns	unchanged	0.976171	-0.0122083	ns	0.222054	0.0754638	ns	unchanged
7108	Q9R066;Q9R066-2	Coxsackievirus and adenovirus receptor homolog	Cxadr	0.015991	-0.165383	ns	0.0396075	-0.0408442	ns	unchanged	0.0133548	-0.114684	ns	0.168926	0.0966907	ns	unchanged
4529	P00173-2;P00173	Cytochrome b5	Cyb5a	0.036102	-0.0606634	ns	0.497352	0.104756	ns	unchanged	0.043798	0.102448	ns	0.557262	0.0453644	ns	unchanged
4546	P04166;Q63144	Cytochrome b5 type B	Cyb5b	0.0181385	-0.197151	ns	0.172064	0.0691448	ns	unchanged	0.0854045	-0.0712173	ns	0.567488	0.0398342	ns	unchanged
4198	G3V9S0;Q5EB81	NADH-cytochrome b5 reductase;NADH-cytochrome b5 reductase 1	Cyb5r1	0.0108179	-0.164636	ns	0.631394	-0.00894044	ns	unchanged	0.486551	0.0443886	ns	0.469321	0.0366747	ns	unchanged
4686	P13264-2;A0A0G2KAN7	Glutaminase kidney isoform, mitochondrial;Glutaminase kidney isoform 68 kDa chain;Glutaminase kidney isoform 65 kDa chain	Gls	0.000129855	-0.326119	FDR1%	0.941708	0.0114689	ns	less syn	0.76245	-0.0797635	ns	0.878807	-0.00304003	ns	unchanged
891	G3V6S0;Q6XD99;A0A0G2K8W9		Sptbn1	4.06597e-05	-0.326004	FDR1%	0.631884	0.0205248	ns	less syn	0.00634418	-0.221945	ns	0.52931	0.0446441	ns	unchanged
3025	D4A8H8		Cyfip1	0.0695059	-0.205302	ns	0.801234	0.0468608	ns	unchanged	0.118104	-0.186687	ns	0.858913	0.0292424	ns	unchanged
4093	G3V8D6;O70277	Tripartite motif-containing protein 3	Trim3	2.8236e-14	-0.325671	FDR1%	0.471717	-0.00517883	ns	less syn	1.38813e-05	0.24123	FDR1%	1.66289e-42	0.345362	FDR1%	more syn & less deg
1147	A0A1K0GY57;Q921A4	Cytoglobin	Cygb	NA	NA	NA	NA	NA	NA	NA	0.000173428	0.379971	FDR1%	0.0215499	0.158782	ns	more syn
3377	F1LPJ6;Q66H62	Ubiquitin carboxyl-terminal hydrolase CYLD	Cyld	0.295131	-0.351576	ns	0.743851	0.0959508	ns	unchanged	0.356735	0.00956957	ns	0.454862	0.133034	ns	unchanged
83	A0A0A0MY09;Q66HD0;A0A0G2K4I4;Q66HD0-2	Endoplasmin	Hsp90b1	0.22841	-0.030495	ns	5.608e-06	0.115031	FDR1%	less deg	1.40826e-07	-0.170313	FDR1%	2.86738e-05	-0.12707	FDR1%	less syn & more deg
5118	P63086	Mitogen-activated protein kinase 1	Mapk1	1.66676e-13	-0.377816	FDR1%	0.000181227	0.115122	FDR1%	slower turnover	8.68702e-24	0.652386	FDR1%	8.68779e-11	0.392141	FDR1%	more syn & less deg
1446	B2GUV0;P97694	Cytohesin-1	Cyth1	0.42788	-0.0644424	ns	0.678137	0.00917387	ns	unchanged	0.00908707	0.112548	ns	0.837438	0.100616	ns	unchanged
5462	Q498R7	UPF0587 protein C1orf123 homolog	Czib	0.656116	-0.0962491	ns	0.739078	0.0337324	ns	unchanged	0.718619	-0.0414814	ns	0.578311	0.0402791	ns	unchanged
5957	Q5RKI5		Flii	0.0327195	-0.114154	ns	0.00183851	0.115345	FDR1%	less deg	3.30618e-10	-0.348731	FDR1%	0.755163	0.0166571	ns	less syn
846	A0A0G2K7W6;P18445;D4AAY6;D3ZG03;D3ZI60	60S ribosomal protein L27a	Rpl27a;RGD1559972;RGD1565415;RGD1561984	0.408582	-0.0159687	ns	2.27611e-06	0.115518	FDR1%	less deg	0.000113218	-0.180901	FDR1%	0.00981584	-0.121848	ns	less syn
167	A0A0G2JTF2;Q6P730;A0A0G2JTS0	Disabled homolog 2-interacting protein	Dab2ip	0.0540191	-0.173211	ns	0.741053	-0.00508351	ns	unchanged	0.197822	0.151392	ns	0.471403	0.047212	ns	unchanged
5041	P61805	Dolichyl-diphosphooligosaccharide--protein glycosyltransferase subunit DAD1	Dad1	0.820724	-0.0183087	ns	0.255219	0.149754	ns	unchanged	0.730176	-0.0482763	ns	0.4267	-0.000898586	ns	unchanged
1293	B0BNA5	Coactosin-like protein	Cotl1	0.89831	0.0670045	ns	0.835551	0.031061	ns	unchanged	0.000196622	0.534239	FDR1%	1.72222e-11	0.196698	FDR1%	more syn & less deg
6157	Q5YLM1	Sn1-specific diacylglycerol lipase alpha	Dagla	NA	NA	NA	NA	NA	NA	NA	0.00136154	0.420711	FDR1%	0.278717	0.108158	ns	more syn
13	A0A096MJ90;F1LNW6;B5DFM3		Ly6h	0.00147165	-0.322714	FDR1%	0.653402	0.0456635	ns	less syn	0.262213	0.110492	ns	0.0541431	0.117286	ns	unchanged
3847	Q5U2T0;F7EZZ0;A0A0G2K264		Dap3	0.0645113	-0.105259	ns	0.277661	0.0499679	ns	unchanged	0.497438	-0.107635	ns	0.14458	-0.0605661	ns	unchanged
3500	F1LT49		Lrrc47	0.0757885	-0.116582	ns	0.00093098	0.115633	FDR1%	less deg	0.405647	0.0209411	ns	0.0486678	0.0942583	ns	unchanged
5397	Q3KRD0	Aspartate--tRNA ligase, mitochondrial	Dars2	0.300012	-0.0700863	ns	0.100025	0.044769	ns	unchanged	0.470256	-0.204687	ns	0.308587	0.00162373	ns	unchanged
5524	Q4KLZ3		Dazap1	0.172637	-0.113931	ns	0.00873219	0.0907095	ns	unchanged	0.108279	-0.0995053	ns	0.163562	-0.0817838	ns	unchanged
4651	P11030;Q6TXF3;Q7TPL2	Acyl-CoA-binding protein;Triakontatetraneuropeptide;Octadecaneuropeptide	Dbi;LOC301444	0.0192651	-0.226448	ns	0.861226	0.0095479	ns	unchanged	0.141847	0.0428005	ns	0.239112	0.12236	ns	unchanged
7022	Q9JHL4-3;Q9JHL4-2;Q9JHL4;Q9JHL4-4	Drebrin-like protein	Dbnl	0.00351494	-0.175611	ns	0.219148	-0.0388899	ns	unchanged	0.253983	-0.0772522	ns	0.307318	0.0136198	ns	unchanged
1469	B2GV15;Q99PU6		Dbt	0.0623014	-0.116494	ns	0.995409	0.00613141	ns	unchanged	0.0612799	-0.1039	ns	0.0844504	-0.0465971	ns	unchanged
4857	P35284;A0A0G2JYB0;D4A376	Ras-related protein Rab-12	Rab12	5.69766e-08	-0.229588	FDR1%	4.61203e-05	0.115708	FDR1%	slower turnover	0.827216	-0.00381088	ns	3.71716e-05	0.122208	FDR1%	less deg
6486	Q6AY55	Dephospho-CoA kinase domain-containing protein	Dcakd	0.356126	-0.0344243	ns	0.0148663	0.252049	ns	unchanged	0.210493	-0.00148069	ns	0.136479	0.13837	ns	unchanged
359	A0A0G2JXG3;Q6AY41	Cell cycle control protein 50A	Tmem30a	0.00786655	-0.150535	ns	0.0164781	0.135282	ns	unchanged	0.190142	-0.0418052	ns	1.14289e-05	0.241251	FDR1%	less deg
6842	Q80Z30	Protein phosphatase 1E	Ppm1e	3.21374e-06	-0.383941	FDR1%	2.0809e-05	0.115963	FDR1%	slower turnover	0.252257	-0.137848	ns	0.00048246	0.100018	FDR1%	less deg
1557	B2RYR8;P62243;M0R7Q5;D3ZIE1;Q6TXJ0	40S ribosomal protein S8	Rps8;LOC100363452;RGD1566369;LOC297756	0.481291	-0.0177162	ns	8.74129e-07	0.116295	FDR1%	less deg	0.0489711	-0.0914488	ns	8.89849e-07	-0.164594	FDR1%	more deg
5105	P63018;M0RCB1;D4A4S3;M0R8M9;F1LZI1	Heat shock cognate 71 kDa protein	Hspa8;LOC102549957;LOC680121	0.00130083	-0.165498	FDR1%	4.24824e-05	0.117404	FDR1%	slower turnover	0.806211	-0.0605304	ns	0.00575554	0.117734	ns	unchanged
868	A0A0G2K8D6;D3ZRV0	DCN1-like protein	Dcun1d1	0.106528	-0.0934271	ns	0.221648	0.0768659	ns	unchanged	0.415504	-0.0449513	ns	0.00241099	0.164164	ns	unchanged
3550	F1LW74		Iqgap2	1.59719e-05	-0.241433	FDR1%	0.000601657	0.117681	FDR1%	slower turnover	0.0264102	-0.185649	ns	0.0139283	0.118234	ns	unchanged
2585	D3ZWL6	Adenosylhomocysteinase	Ahcyl2	4.07637e-06	-0.321025	FDR1%	0.0536214	0.0877383	ns	less syn	2.02993e-10	-0.466373	FDR1%	0.000735649	-0.139533	FDR1%	less syn & more deg
1394	B1WBS4		Vps26b	0.0185739	-0.166657	ns	1.78371e-05	0.11824	FDR1%	less deg	0.00881109	-0.190694	ns	0.0656911	0.0610306	ns	unchanged
6625	Q6MG60	N(G),N(G)-dimethylarginine dimethylaminohydrolase 2	Ddah2	0.787803	-0.0169976	ns	0.124641	-0.017274	ns	unchanged	0.860454	-0.0598347	ns	0.00497461	0.0748145	ns	unchanged
4584	P07340;A0A096MJI9	Sodium/potassium-transporting ATPase subunit beta-1	Atp1b1	1.17638e-17	-0.32035	FDR1%	0.542023	0.0173256	ns	less syn	5.6713e-11	-0.217432	FDR1%	0.000186168	0.0773228	FDR1%	slower turnover
5950	Q5RKH2		Galk1	0.229492	-0.151759	ns	0.00111263	0.118671	FDR1%	less deg	0.0253168	-0.277687	ns	0.00561019	0.116592	ns	unchanged
5194	P85108	Tubulin beta-2A chain	Tubb2a	0.249497	-0.249721	ns	0.399861	0.0349839	ns	unchanged	0.87455	-0.0558065	ns	1.44725e-05	0.236534	FDR1%	less deg
2928	D4A5X7		Gdap1	1.79936e-06	-0.319982	FDR1%	0.892722	-0.0289796	ns	less syn	0.127294	-0.119757	ns	0.120972	0.0407095	ns	unchanged
6570	Q6DGG0;M0RB67	Peptidyl-prolyl cis-trans isomerase D	Ppid;Ppidl1	0.176573	-0.11809	ns	0.00150035	0.119136	FDR1%	less deg	0.00336419	0.184073	ns	0.00282381	0.101642	ns	unchanged
5387	Q3B8Q1	Nucleolar RNA helicase 2	Ddx21	NA	NA	NA	NA	NA	NA	NA	0.386711	0.104556	ns	0.349892	0.129073	ns	unchanged
6333	Q64542-3;Q64542-2;Q64542-4;Q64542	Plasma membrane calcium-transporting ATPase 4	Atp2b4	1.26528e-09	-0.31975	FDR1%	0.0209551	-0.0812092	ns	less syn	3.65695e-05	0.173425	FDR1%	0.000104557	0.092248	FDR1%	more syn & less deg
6243	Q63413;A0A0G2KAT4	Spliceosome RNA helicase Ddx39b	Ddx39b	0.365481	-0.0570532	ns	0.364886	0.0504541	ns	unchanged	0.82243	0.0190398	ns	0.870841	-0.0490005	ns	unchanged
4638	P0DP31;P0DP30;P0DP29;D4ABV5;M0RCJ6;Q304F3		Calm2;Calm3;Tnnc2	3.13217e-08	-0.279842	FDR1%	0.00218607	0.11987	FDR1%	slower turnover	0.0866522	-0.0890101	ns	0.0023419	0.14869	ns	unchanged
6599	Q8VIN2;Q6IRJ7	Annexin	Anxa7	0.000558439	-0.319392	FDR1%	0.339429	0.00117759	ns	less syn	0.483714	-0.00392754	ns	0.0582414	0.087413	ns	unchanged
6185	Q62780	Probable ATP-dependent RNA helicase DDX46	Ddx46	0.0087382	-0.0769216	ns	0.0500609	0.139957	ns	unchanged	0.448436	0.00711469	ns	0.917037	-0.00366487	ns	unchanged
7298	W8BZ34;A0A0G2K9N3;C9WPN2		DDX3Y;Ddx3	0.0156425	-0.114706	ns	0.0178407	0.253814	ns	unchanged	NA	NA	NA	NA	NA	NA	NA
2896	D4A520		Pptc7	5.71585e-05	-0.317979	FDR1%	0.548926	0.0470712	ns	less syn	8.04868e-06	-0.297421	FDR1%	0.000627872	-0.173231	FDR1%	less syn & more deg
1057	A0A0H2UHS7;P12001;Q0QEW8	60S ribosomal protein L18	Rpl18	0.70513	-0.02837	ns	0.00164319	0.119911	FDR1%	less deg	0.0132583	-0.103272	ns	0.0128128	-0.155938	ns	unchanged
3981	G3V734;Q64591	2,4-dienoyl-CoA reductase, mitochondrial	Decr1	0.21555	0.08467	ns	0.459588	-0.0021926	ns	unchanged	0.487512	-0.0876566	ns	0.053985	-0.115583	ns	unchanged
1214	A2VD09;Q9QZM5	Abl interactor 1	Abi1	9.61003e-05	-0.317184	FDR1%	0.340609	0.0460771	ns	less syn	0.302886	-0.0893995	ns	0.191682	0.0480276	ns	unchanged
3115	D4ABM3		Daam1	3.70862e-06	-0.316369	FDR1%	0.0586577	0.0766462	ns	less syn	0.392438	-0.127641	ns	0.869759	0.0171464	ns	unchanged
6853	Q8BHI5;Q9ERM3;Q91YB5	O-acyltransferase;Diacylglycerol O-acyltransferase 1	Dgat1	0.404328	-0.12156	ns	0.786094	-0.0151281	ns	unchanged	NA	NA	NA	NA	NA	NA	NA
5589	Q4V887	Zinc transporter ZIP6	Slc39a6	0.145777	-0.124088	ns	0.310595	-0.0235182	ns	unchanged	2.11431e-05	-0.408671	FDR1%	0.643312	0.079134	ns	less syn
65	A0A096UWG9;Q2YDU7	Diacylglycerol kinase	Dgke	0.079323	-0.222386	ns	0.836983	0.151189	ns	unchanged	0.23019	-0.105937	ns	0.330964	-0.0539017	ns	unchanged
2208	D3ZJH2		Sugp2	1.81655e-09	-0.316215	FDR1%	0.016988	0.28375	ns	less syn	5.08499e-11	0.236617	FDR1%	0.423437	0.0369188	ns	more syn
3802	Q810C5;F1MAB7;Q810C4;Q810C3;A0A0G2K3J7	Diacylglycerol kinase	Dgki;rDGKi-2;rDGKi-3	0.0213181	-0.411332	ns	0.186196	0.0540028	ns	unchanged	0.0982483	-0.0913291	ns	0.371652	-0.0877081	ns	unchanged
2061	D3ZEY4	Diacylglycerol kinase	Dgkq	0.675304	-0.0679693	ns	0.561603	-0.0186035	ns	unchanged	0.107819	-0.185542	ns	0.696261	0.00702638	ns	unchanged
2102	D3ZG48;Q5BJM0		Ddx50	0.0677091	-0.149337	ns	0.0960197	0.309041	ns	unchanged	8.15123e-05	-0.347022	FDR1%	0.165375	-0.149794	ns	less syn
3011	D4A857		Ipo9	0.0121303	-0.127517	ns	0.000190439	0.120506	FDR1%	less deg	0.770821	-0.0353383	ns	0.0122843	0.105311	ns	unchanged
6283	Q63707	Dihydroorotate dehydrogenase (quinone), mitochondrial	Dhodh	0.885636	-0.0743062	ns	0.323147	0.031614	ns	unchanged	0.071178	0.215856	ns	0.463901	0.0431664	ns	unchanged
3641	F1M241;A0A0G2K6J1;B2GV78		Dennd1a	0.27359	-0.041521	ns	0.0103885	0.151805	ns	unchanged	0.375114	-0.0550185	ns	0.0585843	0.0510852	ns	unchanged
6913	Q8VID1	Dehydrogenase/reductase SDR family member 4	Dhrs4	0.694223	0.000684427	ns	0.41025	0.133696	ns	unchanged	0.762551	0.0197698	ns	0.712198	0.00706088	ns	unchanged
688	A0A0G2K478;D3ZDE4;B5DEP0		Dguok	0.57334	-0.13011	ns	0.971187	-0.0133436	ns	unchanged	0.524991	-0.153796	ns	0.468784	-0.000519356	ns	unchanged
5934	Q5RJY4;Q5RJY4-2	Dehydrogenase/reductase SDR family member 7B	Dhrs7b	0.226705	-0.120246	ns	0.0524498	0.13	ns	unchanged	0.477793	-0.124166	ns	0.287175	0.0498911	ns	unchanged
1098	A0A0U1RRZ4;Q4KLP0	Probable 2-oxoglutarate dehydrogenase E1 component DHKTD1, mitochondrial	Dhtkd1	0.759025	-0.0471375	ns	0.396342	-0.012998	ns	unchanged	0.892523	0.0592483	ns	0.671278	-0.0197333	ns	unchanged
5794	Q5HZV9;R9PXV7	Protein phosphatase 1 regulatory subunit 7	Ppp1r7	1.8833e-06	-0.297859	FDR1%	3.94244e-05	0.120998	FDR1%	slower turnover	0.348669	-0.0273824	ns	2.75005e-11	0.179815	FDR1%	less deg
6466	Q6AXY8		Dhrs1	0.281935	-0.0214812	ns	0.64369	0.0753713	ns	unchanged	0.238585	-0.0545925	ns	0.50056	0.0670597	ns	unchanged
1101	F1LY19;A0A0U1RS25		Upf1	2.99097e-06	-0.145984	FDR1%	3.69119e-06	0.121052	FDR1%	slower turnover	0.142908	0.0546129	ns	0.732669	-0.105985	ns	unchanged
2731	D4A0T8		Dhrs7	0.417375	-0.16525	ns	0.853721	0.0349038	ns	unchanged	0.973186	0.00429031	ns	0.403778	-0.0405939	ns	unchanged
6770	Q765A7	GPI inositol-deacylase	Pgap1	6.12816e-19	-0.536878	FDR1%	9.67172e-07	0.121062	FDR1%	slower turnover	1.05851e-25	-0.618394	FDR1%	0.00386289	-0.149487	ns	less syn
2158	D3ZHW0		Dhx29	0.996637	-0.0695927	ns	0.0438795	0.1479	ns	unchanged	0.894552	-0.0572944	ns	0.879535	0.0289718	ns	unchanged
2815	D4A2Z8		Dhx36	0.0639793	-0.121914	ns	0.31788	0.30032	ns	unchanged	0.72562	0.0274462	ns	0.554583	0.0235705	ns	unchanged
387	A0A0G2JY22	Submitted name: Disco-interacting protein 2 homolog B	Dip2b	0.0736473	-0.0839572	ns	0.082224	0.136212	ns	unchanged	0.00501133	-0.135788	ns	0.338863	0.0229993	ns	unchanged
2354	D3ZPT0;D3ZUH5		Prr36	9.98172e-07	-0.315738	FDR1%	0.952464	-0.00508304	ns	less syn	0.571484	0.0036116	ns	0.780661	0.0638227	ns	unchanged
5515	Q4KLI7;A0A0G2K2X3;Q6TUF1		Sf3a3	0.00502655	-0.155115	ns	0.00100041	0.121402	FDR1%	less deg	0.179959	-0.0836491	ns	0.121726	-0.0974937	ns	unchanged
7187	Q9Z2Z8	7-dehydrocholesterol reductase	Dhcr7	0.00942305	-0.341669	ns	9.47702e-05	0.121402	FDR1%	less deg	0.000327576	-0.368934	FDR1%	0.801816	-0.0354907	ns	less syn
794	D3ZIL9;A0A0G2K6W6	DIS3-like exonuclease 2	Dis3l2	0.00818256	-0.236443	ns	0.630761	0.115115	ns	unchanged	0.0171244	-0.147046	ns	0.440577	0.0668573	ns	unchanged
5940	Q5RK17;D4A7Z5		Diablo;LOC100360940	0.967243	-0.0452488	ns	0.0899917	-0.00426714	ns	unchanged	0.00318434	-0.236759	ns	0.0010558	-0.0788508	FDR1%	more deg
4891	P40615;A0A0G2K700	H/ACA ribonucleoprotein complex subunit 4	Dkc1	0.114743	-0.0772982	ns	0.321343	0.0821556	ns	unchanged	0.25846	0.0784743	ns	0.115029	0.0314328	ns	unchanged
4913	P47728	Calretinin	Calb2	0.00242723	-0.314586	FDR1%	0.159537	-0.029695	ns	less syn	0.925624	-0.179838	ns	0.251675	0.122955	ns	unchanged
4818	P28841	Neuroendocrine convertase 2	Pcsk2	8.36382e-11	-0.314405	FDR1%	0.296757	0.191101	ns	less syn	0.0150414	0.0810255	ns	6.23478e-07	0.306707	FDR1%	less deg
568	F1LNM0;A0A0G2K1M2;Q62696	Disks large homolog 1	Dlg1	0.718891	-0.00636474	ns	0.289119	-0.022739	ns	unchanged	0.294128	-0.0813303	ns	0.0668853	0.0761652	ns	unchanged
2763	D4A1G8		Cep170b	2.09593e-07	-0.313341	FDR1%	0.628625	0.0273367	ns	less syn	0.162092	0.108004	ns	0.104338	0.092701	ns	unchanged
1780	B5DFN4		Pfdn5	0.114213	-0.11489	ns	0.000424338	0.122103	FDR1%	less deg	0.0423533	-0.0830328	ns	0.291707	0.0746285	ns	unchanged
3711	F1M775		Diaph1	NA	NA	NA	NA	NA	NA	NA	0.345252	0.0555491	ns	0.143795	0.218648	ns	unchanged
1378	Q499V7;F1LPV8;Q68FT4;B1H270;Q5EBA9	Succinyl-CoA ligase subunit beta	Suclg2	0.463752	-0.0496601	ns	0.00134203	0.122262	FDR1%	less deg	0.284184	-0.0197392	ns	0.570485	-0.041248	ns	unchanged
5199	P85971;G3V8D5	6-phosphogluconolactonase	Pgls	0.000583983	-0.224719	FDR1%	4.70381e-05	0.122323	FDR1%	slower turnover	0.320183	0.0430942	ns	1.55303e-15	0.232848	FDR1%	less deg
3936	G3V6P2;Q01205;Q8CJG5;D0VYQ0	Dihydrolipoyllysine-residue succinyltransferase component of 2-oxoglutarate dehydrogenase complex, mitochondrial	Dlst;DLST	0.0725809	-0.0765186	ns	0.858964	0.0133664	ns	unchanged	0.00249344	-0.161777	ns	0.675481	0.00998146	ns	unchanged
4438	O35567	Bifunctional purine biosynthesis protein PURH;Phosphoribosylaminoimidazolecarboxamide formyltransferase;IMP cyclohydrolase	Atic	0.486161	0.0141149	ns	5.11775e-07	0.122594	FDR1%	less deg	0.769253	0.00511592	ns	3.25405e-06	0.107489	FDR1%	less deg
4573	P06687	Sodium/potassium-transporting ATPase subunit alpha-3	Atp1a3	1.89835e-27	-0.313082	FDR1%	0.33769	0.00929832	ns	less syn	4.06291e-10	-0.131153	FDR1%	3.80112e-07	0.0865245	FDR1%	slower turnover
6828	Q80U96;Q9WUW7	Exportin-1	Xpo1	0.856852	-0.0448154	ns	3.96265e-11	0.122713	FDR1%	less deg	0.0017124	-0.0887048	FDR1%	1.04852e-06	0.100321	FDR1%	slower turnover
6983	Q9EPF2;Q9EPF2-2	Cell surface glycoprotein MUC18	Mcam	0.00119693	-0.311185	FDR1%	0.00230562	-0.135844	ns	less syn	0.137173	-0.166542	ns	0.0043692	0.180283	ns	unchanged
6334	Q64548	Submitted name: Semaphorin 4A	Rtn1	3.12925e-10	-0.310571	FDR1%	0.54071	0.0540055	ns	less syn	0.399939	-0.0134329	ns	0.990449	0.0420223	ns	unchanged
1608	B2RZ97;F1LRJ0;A0A0G2JX46		Kcmf1	2.28732e-05	-0.31051	FDR1%	0.475921	0.142803	ns	less syn	0.0844363	-0.183506	ns	0.461854	0.0632395	ns	unchanged
1962	D3ZBZ6		Disp2	0.699352	-0.135858	ns	0.786079	0.0409909	ns	unchanged	0.0351224	-0.296167	ns	0.0220121	-0.511121	ns	unchanged
4773	P21707;Q707P0	Synaptotagmin-1	Syt1	1.10844e-08	-0.310159	FDR1%	0.410937	0.0206784	ns	less syn	2.60141e-09	-0.27633	FDR1%	0.00560868	0.0851512	ns	less syn
5073	P62749	Hippocalcin-like protein 1	Hpcal1	2.92854e-06	-0.310105	FDR1%	0.177305	0.060917	ns	less syn	0.000312938	-0.279877	FDR1%	0.332372	0.0510884	ns	less syn
7003	Q9ERH3;Q9ERH3-2	WD repeat-containing protein 7	Wdr7	7.70224e-13	-0.309742	FDR1%	0.0113028	0.0338061	ns	less syn	0.500991	0.00416739	ns	2.89228e-08	0.113987	FDR1%	less deg
1456	D4A559;B2GUY4		Dmtn	0.021922	-0.354899	ns	0.1529	-0.170166	ns	unchanged	0.205107	-0.0217904	ns	0.00116823	0.150356	FDR1%	less deg
251	A0A0G2JV31;O54975	Xaa-Pro aminopeptidase 1;Xaa-Pro aminopeptidase 1, N-terminally processed	Xpnpep1	3.23761e-05	-0.178987	FDR1%	2.05607e-06	0.122718	FDR1%	slower turnover	0.230409	-0.0273754	ns	2.75508e-10	0.137099	FDR1%	less deg
3655	F1M3D2;M0RDT6		Dmwd	0.379505	-0.102551	ns	0.00673732	0.0365506	ns	unchanged	0.797452	0.0431387	ns	0.0826958	0.169409	ns	unchanged
3075	D4AA13		Dmxl1	0.144029	-0.261187	ns	0.018335	0.056163	ns	unchanged	0.00272277	-0.310072	ns	0.742229	0.0524295	ns	unchanged
939	A0A0G2K9Q7;Q62625-2;Q62625;Q7TQ75	Microtubule-associated proteins 1A/1B light chain 3B	Map1lc3b;LOC100363716	0.000204015	-0.309667	FDR1%	0.917503	0.12431	ns	less syn	0.166487	0.0672398	ns	0.532611	0.0284898	ns	unchanged
1355	B0K030;D3ZUU5		Dnajb1	0.150457	-0.142429	ns	0.00258854	0.16933	ns	unchanged	0.170308	-0.103829	ns	0.0314498	0.0902466	ns	unchanged
5301	Q09073	ADP/ATP translocase 2;ADP/ATP translocase 2, N-terminally processed	Slc25a5	6.08292e-10	-0.309511	FDR1%	0.360717	0.00321771	ns	less syn	4.49554e-12	-0.253279	FDR1%	0.70953	-0.0521854	ns	less syn
1001	Q52KS1;A0A0G2KBC7;P47858;Q9Z1I3	ATP-dependent 6-phosphofructokinase;ATP-dependent 6-phosphofructokinase, muscle type	Pfkm	2.50273e-06	-0.245825	FDR1%	3.73464e-06	0.122882	FDR1%	slower turnover	0.0200836	0.0959062	ns	1.72453e-09	0.139048	FDR1%	less deg
7114	Q9R0T3;A0A1W2Q6P6	DnaJ homolog subfamily C member 3	Dnajc3	NA	NA	NA	NA	NA	NA	NA	0.179707	-0.0790993	ns	0.0399529	-0.141492	ns	unchanged
5918	Q5QD51-3;Q5QD51-2;Q5QD51;Q62766	A-kinase anchor protein 12	Akap12	0.897291	0.0193847	ns	0.692363	0.0110222	ns	unchanged	0.726194	0.0132251	ns	1.06754e-07	0.234926	FDR1%	less deg
6167	Q62658	Peptidyl-prolyl cis-trans isomerase FKBP1A	Fkbp1a	2.92315e-06	-0.309305	FDR1%	0.0125746	0.11793	ns	less syn	0.000421718	0.206577	FDR1%	7.27724e-07	0.305161	FDR1%	more syn & less deg
791	F1LQ81;A0A0G2K6U1;Q9QUL6;O88960;O88975	Vesicle-fusing ATPase	Nsf	1.40323e-20	-0.274179	FDR1%	3.41336e-15	0.122949	FDR1%	slower turnover	4.43929e-14	-0.261286	FDR1%	1.13215e-11	0.116793	FDR1%	slower turnover
7106	Q9QZK8	Deoxyribonuclease-2-alpha	Dnase2	0.0649883	0.267258	ns	0.195563	0.0849909	ns	unchanged	0.0519949	0.217087	ns	0.914181	0.00807438	ns	unchanged
7007	Q9ES54;F1LQX9;A0A0G2JU66	Nuclear protein localization protein 4 homolog	Nploc4	0.64101	-0.025899	ns	0.000949221	0.123104	FDR1%	less deg	0.766615	-0.0355251	ns	0.0012926	0.155674	FDR1%	less deg
4425	O35303;O35303-5;O35303-4;O35303-6	Dynamin-1-like protein	Dnm1l	0.0903297	-0.0906626	ns	0.616763	0.135758	ns	unchanged	0.0201612	0.0828544	ns	0.313737	0.158342	ns	unchanged
6961	Q99ML5	Prenylcysteine oxidase	Pcyox1	0.00222363	-0.120596	FDR1%	9.7429e-06	0.123142	FDR1%	slower turnover	0.739569	-0.00553565	ns	0.502353	0.0180975	ns	unchanged
5299	Q08877-9;Q08877-11;Q08877-13;Q08877-7;Q08877-10;Q08877-12;Q08877-2;Q08877-4;Q08877-6;Q08877;Q08877-3;Q08877-5	Dynamin-3	Dnm3	0.00693885	-0.317364	ns	0.758933	0.00470636	ns	unchanged	0.0818319	0.162016	ns	0.0169404	0.107708	ns	unchanged
3175	D4AD89		Sez6l	7.56779e-05	-0.306718	FDR1%	0.0145355	0.192138	ns	less syn	0.0296783	-0.0431083	ns	0.362079	0.199601	ns	unchanged
4445	O35820	2-deoxynucleoside 5-phosphate N-hydrolase 1	Dnph1	0.619208	-0.245815	ns	0.444143	0.0902352	ns	unchanged	0.748008	0.0705098	ns	0.937488	0.28136	ns	unchanged
6789	Q7M0E3;Q7M094	Destrin	Dstn	0.981082	-0.104992	ns	0.000940671	0.12352	FDR1%	less deg	0.0151227	-0.147448	ns	0.0291878	0.0771209	ns	unchanged
6792	Q7M767;A0A0G2JU07	Ubiquitin-conjugating enzyme E2 variant 2	Ube2v2	0.000521555	-0.306715	FDR1%	0.07416	0.0376481	ns	less syn	0.0308786	0.11	ns	3.35217e-09	0.193608	FDR1%	less deg
1583	B2RZ08		Tmem263	0.191571	-0.167457	ns	2.01712e-06	0.123793	FDR1%	less deg	0.806316	0.00358458	ns	0.00840598	-0.13207	ns	unchanged
3623	F1M0Z1;A0A1P0PBZ6		Trio	0.00393909	-0.143739	ns	1.66284e-06	0.123796	FDR1%	less deg	0.709764	0.00781871	ns	4.64776e-06	0.120825	FDR1%	less deg
1409	B1WBY5		Dnajc11	0.696369	-0.0909824	ns	0.666825	0.0271261	ns	unchanged	0.201292	-0.0901964	ns	0.820317	-0.0185558	ns	unchanged
5197	P85845;Q80X10	Fascin	Fscn1	0.000118744	-0.43412	FDR1%	2.15015e-05	0.123926	FDR1%	slower turnover	0.858511	0.108861	ns	3.33789e-11	0.214827	FDR1%	less deg
4272	M0R6L8		Dnajc19	NA	NA	NA	NA	NA	NA	NA	0.91061	-0.0467927	ns	0.181836	0.0528365	ns	unchanged
1330	B0BNL2		LOC364561	0.000551727	-0.305158	FDR1%	0.173857	0.081013	ns	less syn	0.408818	-0.113109	ns	1.91057e-08	0.258734	FDR1%	less deg
4200	G3V9T7;Q4G022	ATPase Asna1;Arsenical pump-driving ATPase	Asna1	0.0073955	-0.180724	ns	0.000896817	0.124365	FDR1%	less deg	0.0011839	-0.212543	FDR1%	0.0358921	0.0420831	ns	less syn
843	F1LS02;A0A0G2K7T6;P37199	Nuclear pore complex protein Nup155	Nup155	0.969994	-0.00664126	ns	0.00144395	0.124545	FDR1%	less deg	0.216676	0.0437307	ns	0.593105	0.0438856	ns	unchanged
1156	A0A1W2Q656;Q5U215		Dner	0.133234	-0.12613	ns	0.954607	0.322181	ns	unchanged	5.95596e-05	-0.487016	FDR1%	0.574661	-0.0992462	ns	less syn
4160	G3V946;Q8K3E7	Protein dpy-30 homolog	Dpy30	0.890899	-0.0517767	ns	0.829437	0.0518403	ns	unchanged	0.289075	-0.0898349	ns	0.463264	0.0018466	ns	unchanged
6415	Q68FS1	Cytosolic Fe-S cluster assembly factor NUBP2	Nubp2	0.185823	-0.0906496	ns	0.00553283	0.117054	ns	unchanged	0.665093	0.0374012	ns	0.000824828	0.219378	FDR1%	less deg
5612	Q4V8H5		Dnpep	0.0826138	-0.0941519	ns	0.281926	0.0432096	ns	unchanged	0.388095	-0.0230686	ns	0.000318655	0.103401	FDR1%	less deg
2714	D4A031		Ddx42	1.07742e-06	-0.304816	FDR1%	0.281338	0.0741316	ns	less syn	0.0628711	-0.0495415	ns	0.884361	-0.0691781	ns	unchanged
1359	Q5XFV9;B0K038;Q6P3E1;P62250;M0R4I3;M0R8S7;A0A1W2Q631	40S ribosomal protein S16	Rps16;RGD1561137;LOC102548369	0.666199	-0.0162909	ns	1.75082e-05	0.124877	FDR1%	less deg	0.0117009	-0.159357	ns	3.25118e-05	-0.18166	FDR1%	more deg
972	A0A0G2KAI8	Submitted name: Developmentally-regulated GTP-binding protein 2	Drg2	0.150374	-0.121161	ns	0.0039536	0.272637	ns	unchanged	0.536455	-0.0258761	ns	0.0797118	0.152887	ns	unchanged
2010	D3ZDC0;F1LPZ8;Q62889-2;Q62889-4;Q62889-3;Q62889;A0A096MK63	Neuroligin-3	Nlgn3	6.1716e-11	-0.304545	FDR1%	0.507318	-0.111173	ns	less syn	0.257061	-0.0277883	ns	0.521085	0.0143828	ns	unchanged
1351	F1M013;D3ZU22;B0K021;P62425;D3ZPL5;M0R3M3;F1M1M2;D4A8X2;F1M0S7;M0R7A4	60S ribosomal protein L7a	LOC100910109;LOC100361311;LOC100911966;Rpl7a;RGD1562953;RGD1563220	0.710567	-0.0383427	ns	0.00175243	0.125008	FDR1%	less deg	0.202699	-0.114068	ns	0.00604865	-0.165349	ns	unchanged
213	A0A0G2JUC7;Q6AYH5	Dynactin subunit 2	Dctn2	0.000600943	-0.15593	FDR1%	0.000424214	0.125081	FDR1%	slower turnover	0.0122485	-0.113391	ns	0.00114087	0.128304	FDR1%	less deg
1345	B0K014;D4A9K3	D-tyrosyl-tRNA(Tyr) deacylase	Dtd1	0.0367045	-0.220232	ns	0.810154	0.016411	ns	unchanged	0.240251	-0.00396024	ns	0.0162782	0.108378	ns	unchanged
6646	Q6P502	T-complex protein 1 subunit gamma	Cct3	8.96411e-06	-0.124325	FDR1%	1.17785e-05	0.125553	FDR1%	slower turnover	0.370553	-0.00432258	ns	0.28047	0.0185797	ns	unchanged
3458	F1LRS2;A0A0G2K3H2;B2RZA1;Q45N69		Dock7	0.657164	0.0315899	ns	0.0857452	0.124607	ns	unchanged	0.147778	-0.073582	ns	0.628394	-0.0543105	ns	unchanged
5163	P70583;D4A6V3	Deoxyuridine 5-triphosphate nucleotidohydrolase	Dut	NA	NA	NA	NA	NA	NA	NA	0.162077	-0.0998568	ns	0.907703	-0.00558723	ns	unchanged
837	F1M8G9;A0A0G2K7P9;Q6RKB3;A0A0G2K7R3;Q6RKB2		Ncam2	7.95152e-08	-0.30421	FDR1%	0.677951	0.0533824	ns	less syn	0.000700099	-0.164814	FDR1%	0.0387493	0.0856976	ns	less syn
5051	P62168	Neuronal calcium sensor 1	Ncs1	5.73652e-05	-0.30378	FDR1%	0.717127	-0.0463316	ns	less syn	0.0544638	0.155305	ns	8.77769e-16	0.531118	FDR1%	less deg
6198	Q6AZ35;Q62871-2;D3ZU74;G3V9V3;Q62871-3;Q62871	Cytoplasmic dynein 1 intermediate chain 2	Dync1i2	0.147152	-0.0903288	ns	0.0420393	0.153039	ns	unchanged	0.727072	-0.0156494	ns	0.585662	0.0623942	ns	unchanged
3486	F1LSM8		Dock9	NA	NA	NA	NA	NA	NA	NA	0.649652	-0.12693	ns	0.281573	0.145853	ns	unchanged
5726	Q5D023;Q62698;A0A096MIY2;O35109;O35108;Q76N43;O35110;A0A096MKA1;A0A096MIX4	Cytoplasmic dynein 1 light intermediate chain 2	Dync1li2	0.238906	-0.151401	ns	0.00543679	0.169257	ns	unchanged	0.167266	0.065098	ns	0.422746	0.0152876	ns	unchanged
7045	Q9JJ79;D3ZBB8	Cytoplasmic dynein 2 heavy chain 1	Dync2h1	0.0603774	-0.22545	ns	0.281698	0.0891484	ns	unchanged	0.931391	-0.0528158	ns	0.394444	0.0876653	ns	unchanged
4793	Q6P6T6;P24268	Cathepsin D;Cathepsin D 12 kDa light chain;Cathepsin D 9 kDa light chain;Cathepsin D 34 kDa heavy chain;Cathepsin D 30 kDa heavy chain	Ctsd	0.038588	0.106134	ns	0.0140907	0.0897609	ns	unchanged	0.625692	-0.0126273	ns	2.95188e-13	0.218926	FDR1%	less deg
7081	Q9QWJ9;Q9QX38	Neuropilin-1	Nrp1	1.83435e-08	-0.303434	FDR1%	0.161437	0.050348	ns	less syn	0.00121918	-0.120599	FDR1%	0.121621	0.0587316	ns	less syn
6012	Q5U2X8		Acot9	4.87095e-06	-0.303169	FDR1%	0.232907	-0.0109858	ns	less syn	0.00581619	-0.174772	ns	0.259698	0.014107	ns	unchanged
1558	B2RYR9;Q9Z336	Dynein light chain Tctex-type 1	Dynlt1	0.238219	0.0468936	ns	0.0776068	0.168439	ns	unchanged	0.402003	0.0468458	ns	0.35771	0.0159904	ns	unchanged
3029	D4A8N1		Dpm1	0.00297279	-0.160712	ns	0.00295012	0.223199	ns	unchanged	1.11235e-05	-0.222003	FDR1%	0.888633	0.0409482	ns	less syn
6165	Q62651	Delta(3,5)-Delta(2,4)-dienoyl-CoA isomerase, mitochondrial	Ech1	0.0668131	-0.0652945	ns	0.516922	0.0371635	ns	unchanged	0.819281	0.00655689	ns	0.00284888	-0.11078	ns	unchanged
6525	Q6AYG5	Ethylmalonyl-CoA decarboxylase	Echdc1	0.0161082	-0.159732	ns	0.67423	-0.0113272	ns	unchanged	0.606648	-0.0563554	ns	0.972562	-0.00490778	ns	unchanged
4699	P14604	Enoyl-CoA hydratase, mitochondrial	Echs1	0.344569	0.0207576	ns	0.738952	-0.00901055	ns	unchanged	0.920321	-0.0330705	ns	0.0070178	-0.063171	ns	unchanged
4789	Q68G41;P23965;A0A0G2K2R2	Enoyl-CoA delta isomerase 1, mitochondrial	Eci1	0.904668	0.0208823	ns	0.416985	0.0294292	ns	unchanged	0.654406	-0.0277394	ns	0.350056	-0.0593714	ns	unchanged
6093	Q5XIC0	Enoyl-CoA delta isomerase 2, mitochondrial	Eci2	0.664603	-0.0525065	ns	0.437261	0.0298064	ns	unchanged	0.934487	-0.0500454	ns	0.645428	-0.050998	ns	unchanged
2176	D3ZIJ5		Dpm3	0.17569	-0.190629	ns	0.0559752	0.317372	ns	unchanged	0.859181	-0.235286	ns	0.467715	0.0473643	ns	unchanged
6239_m	Q63372;Q63372-1;Q63372-3;Q63372-4;Q63372-5;Q63372-6;Q63372-7;Q63372-8;Q63372-9;Q63372-10;Q63372-11;Q63372-12;Q63372-13;Q63373;Q63373-2;Q63373-3;Q63373-4;M0RBN6;A0A0U1RRR4	Neurexin-1;Neurexin-1-beta	Nrxn1	2.84629e-23	-0.302579	FDR1%	0.659369	-0.0124372	ns	less syn	7.39016e-19	-0.303845	FDR1%	0.00121947	-0.0916971	FDR1%	less syn & more deg
1325	B0BNJ5;P69736	Endothelial differentiation-related factor 1	Edf1	NA	NA	NA	NA	NA	NA	NA	0.614535	-0.0192523	ns	0.549166	0.121351	ns	unchanged
1366	E9PU42;B1H223		Dscr3	0.317424	-0.116931	ns	0.0234791	0.104348	ns	unchanged	0.653185	0.0916356	ns	0.00251692	0.107896	ns	unchanged
4729	P18163	Long-chain-fatty-acid--CoA ligase 1	Acsl1	0.0168859	-0.0901918	ns	0.0758687	0.0691818	ns	unchanged	2.64057e-08	-0.388393	FDR1%	0.494101	0.00911491	ns	less syn
1918	D3ZAP9	Glycerol-3-phosphate dehydrogenase [NAD(+)]	Gpd1l	0.000938541	-0.222485	FDR1%	0.00108885	0.12566	FDR1%	slower turnover	0.00219765	0.163804	ns	1.61813e-06	0.214359	FDR1%	less deg
2972	D4A772		Dtna	0.570241	-0.0349913	ns	0.110817	0.0989031	ns	unchanged	0.00667155	-0.272036	ns	0.16168	0.0722432	ns	unchanged
4815	P28480;A0A096MJA0	T-complex protein 1 subunit alpha	Tcp1	0.000818204	-0.141481	FDR1%	1.50097e-14	0.126083	FDR1%	slower turnover	0.599158	-0.00785699	ns	0.263911	0.0461566	ns	unchanged
6413	Q68FR9	Elongation factor 1-delta	Eef1d	0.383941	0.0971672	ns	0.0652688	0.126372	ns	unchanged	0.0322088	0.127159	ns	0.196546	0.0509386	ns	unchanged
3391	F1LPV2;P98166	Very low-density lipoprotein receptor	Vldlr	9.49467e-06	-0.302532	FDR1%	0.0477625	0.113867	ns	less syn	6.9767e-09	-0.410072	FDR1%	0.477301	-0.059927	ns	less syn
7097	Q9QYU4;A0A0G2K568	Ketimine reductase mu-crystallin	Crym	0.000526628	-0.253703	FDR1%	1.7635e-10	0.126372	FDR1%	slower turnover	0.529199	-0.0524932	ns	8.1306e-36	0.282712	FDR1%	less deg
4460	O54861	Sortilin	Sort1	9.03857e-12	-0.302501	FDR1%	0.0175629	0.261618	ns	less syn	1.17213e-05	-0.221953	FDR1%	0.558349	-0.0554693	ns	less syn
234	A0A0G2JUT1;Q6AYP5;Q6AYP5-2		Cadm1	8.16673e-09	-0.30165	FDR1%	0.342937	0.114842	ns	less syn	0.0685033	0.102264	ns	0.783724	0.0823723	ns	unchanged
6078	Q5XI74	Endonuclease/exonuclease/phosphatase family domain-containing protein 1	Eepd1	0.0119087	0.220043	ns	0.0215003	0.177889	ns	unchanged	0.0022676	-0.414209	ns	0.925746	-0.101797	ns	unchanged
4991	P55770;H7C5X3	NHP2-like protein 1;NHP2-like protein 1, N-terminally processed	Nhp2l1;RGD1566078	0.0799937	-0.0815059	ns	0.000483926	0.127029	FDR1%	less deg	0.418973	0.0905951	ns	0.0328414	0.0447782	ns	unchanged
4809	P27274	CD59 glycoprotein	Cd59	0.889518	-0.0193448	ns	0.00020222	0.127523	FDR1%	less deg	3.13268e-06	-0.377495	FDR1%	0.0722668	0.0439889	ns	less syn
1798	C7C5T2;P47860;A0A0A0MXY5	ATP-dependent 6-phosphofructokinase;ATP-dependent 6-phosphofructokinase, platelet type	Pfkp	1.83242e-05	-0.153952	FDR1%	4.19771e-11	0.127676	FDR1%	slower turnover	0.00619231	0.0524464	ns	4.38394e-15	0.188268	FDR1%	less deg
764	A0A0G2K657;P32736-2;P32736;F1M2I5		Opcml	3.06731e-07	-0.306051	FDR1%	0.00103574	0.127715	FDR1%	slower turnover	0.00802696	0.157853	ns	9.15235e-05	0.0991807	FDR1%	less deg
7090	Q9QYF3	Unconventional myosin-Va	Myo5a	4.38326e-08	-0.412962	FDR1%	0.00179571	0.128028	FDR1%	slower turnover	0.479779	0.0280777	ns	0.000921234	0.190182	FDR1%	less deg
3782	F1M9W9;B2GV66		Trappc8;RGD1309102	0.0142132	-0.0861109	ns	8.34231e-05	0.128764	FDR1%	less deg	0.650555	-0.0432269	ns	0.206122	0.0281747	ns	unchanged
1764	B5DFJ3;G3V9M1		Ddx23	0.108657	-0.154774	ns	0.000171485	0.129011	FDR1%	less deg	0.385893	-0.0179698	ns	0.266103	-0.0570789	ns	unchanged
5402	Q3KRE3;Q45QK2;O35358	Guanine nucleotide-binding protein subunit gamma	Gng10	0.777058	-0.00744795	ns	0.176462	-0.11295	ns	unchanged	4.25052e-12	0.505681	FDR1%	0.00065557	0.252108	FDR1%	more syn & less deg
1797	C6ZII9;B2RZ31		Sirt3	0.00281768	-0.301471	FDR1%	0.564003	0.0139282	ns	less syn	0.185248	-0.0971687	ns	0.952693	-0.0108259	ns	unchanged
2550	D3ZVQ0	Ubiquitin carboxyl-terminal hydrolase	Usp5	9.56911e-05	-0.139702	FDR1%	0.000233609	0.129051	FDR1%	slower turnover	0.0224014	-0.10244	ns	5.91207e-05	0.130352	FDR1%	less deg
5537	Q4KM77	Etoposide-induced protein 2.4 homolog	Ei24	0.00485493	-0.181452	ns	0.00354366	0.205881	ns	unchanged	0.344567	-0.119548	ns	0.278635	0.00343437	ns	unchanged
6135	Q5XIM9	T-complex protein 1 subunit beta	Cct2	5.85714e-06	-0.144014	FDR1%	1.90331e-20	0.12913	FDR1%	slower turnover	0.074691	-0.0285479	ns	0.603229	0.0324596	ns	unchanged
4730	P18265;A0A0G2K7W7	Glycogen synthase kinase-3 alpha	Gsk3a	0.0008855	-0.170311	FDR1%	0.00115767	0.129349	FDR1%	slower turnover	0.202759	0.129046	ns	7.04255e-05	0.192435	FDR1%	less deg
255	A0A0G2JV57;A0A0U1RRY3;A0A0U1RRZ2;Q64270;A0A1L1WKF1	Translation initiation factor eIF-2B subunit alpha	Eif2b1	0.823175	-0.0737776	ns	0.145895	0.245588	ns	unchanged	0.714983	-0.112254	ns	0.192519	0.161348	ns	unchanged
5157	P70541	Translation initiation factor eIF-2B subunit gamma	Eif2b3	NA	NA	NA	NA	NA	NA	NA	0.308877	-0.0115937	ns	0.0377896	0.167074	ns	unchanged
6330	Q64350	Translation initiation factor eIF-2B subunit epsilon	Eif2b5	0.222456	-0.177782	ns	0.215282	0.0809376	ns	unchanged	0.488048	-0.151603	ns	0.0217677	0.070706	ns	unchanged
5142	P68101	Eukaryotic translation initiation factor 2 subunit 1	Eif2s1	0.00580288	-0.122948	ns	0.292071	0.105029	ns	unchanged	0.0655109	-0.0484585	ns	0.981918	0.0303129	ns	unchanged
1681	B5DEJ5;D3Z9S4		Eefsec	0.957028	-0.10689	ns	0.272586	0.183126	ns	unchanged	NA	NA	NA	NA	NA	NA	NA
5174	P81795;A0A096MJB9	Eukaryotic translation initiation factor 2 subunit 3	Eif2s3	0.00573908	-0.139848	ns	0.0492011	0.179066	ns	unchanged	0.743536	-0.0367988	ns	0.687268	0.0666588	ns	unchanged
6597	Q6IRF8;O54715	V-type proton ATPase subunit S1	Atp6ap1	0.111295	-0.134729	ns	0.00142966	0.12975	FDR1%	less deg	0.00732029	-0.1347	ns	0.328356	0.0569523	ns	unchanged
5497	Q4G061	Eukaryotic translation initiation factor 3 subunit B	Eif3b	0.0885749	-0.0989937	ns	0.0114075	0.0642565	ns	unchanged	0.0226985	-0.15006	ns	0.00702293	-0.133464	ns	unchanged
6314	Q641Z8	Peflin	Pef1	0.101738	-0.163894	ns	0.178419	0.0631327	ns	unchanged	0.752303	0.00239215	ns	0.000689227	0.21647	FDR1%	less deg
6536	Q6AYK8	Eukaryotic translation initiation factor 3 subunit D	Eif3d	0.24206	-0.0518187	ns	0.105951	0.0358638	ns	unchanged	0.00283775	-0.138353	ns	0.00390354	-0.166625	ns	unchanged
4855	P35213-2;P35213	14-3-3 protein beta/alpha;14-3-3 protein beta/alpha, N-terminally processed	Ywhab	1.88433e-10	-0.300519	FDR1%	0.00721609	0.0699822	ns	less syn	0.252735	-0.0369198	ns	0.419198	0.0350026	ns	unchanged
1299	B0BNB2;D3ZU54	Density-regulated protein	Denr	0.126538	-0.0999211	ns	0.472758	0.0441951	ns	unchanged	0.104076	0.0191485	ns	0.000208929	0.215972	FDR1%	less deg
5938	Q5RK09	Eukaryotic translation initiation factor 3 subunit G	Eif3g	0.0097295	-0.148082	ns	0.486848	0.00808859	ns	unchanged	0.345191	-0.154343	ns	0.170554	-0.116333	ns	unchanged
6684	Q6P9U8;D3ZL77	Eukaryotic translation initiation factor 3 subunit H	Eif3h	0.13556	-0.0591078	ns	0.438354	0.0540978	ns	unchanged	0.000260013	-0.133939	FDR1%	0.000111267	-0.165732	FDR1%	less syn & more deg
1294	B0BNA7;M0RCH0	Eukaryotic translation initiation factor 3 subunit I	Eif3i	0.00777912	-0.149017	ns	0.0245094	0.0717872	ns	unchanged	3.78657e-05	-0.19356	FDR1%	0.000421432	-0.183547	FDR1%	less syn & more deg
1174	A0JPM9	Eukaryotic translation initiation factor 3 subunit J	Eif3j	0.665476	-0.118942	ns	0.244129	-0.0428085	ns	unchanged	0.922299	-0.0167894	ns	0.165917	-0.012268	ns	unchanged
5145	P68255	14-3-3 protein theta	Ywhaq	1.36561e-06	-0.298649	FDR1%	0.0439787	0.0509655	ns	less syn	0.211561	0.078307	ns	0.0538642	0.090184	ns	unchanged
4005	G3V7G9	Eukaryotic translation initiation factor 3 subunit L	Eif3l	0.191983	-0.0817766	ns	0.801767	0.0645806	ns	unchanged	0.00011653	-0.130479	FDR1%	1.43688e-08	-0.21074	FDR1%	less syn & more deg
3943	G3V6Q9;Q925T8	BMP/retinoic acid-inducible neural-specific protein 1	Brinp1	0.00860963	-0.253317	ns	0.205902	-0.0234804	ns	unchanged	6.30775e-05	-0.383756	FDR1%	0.116073	0.0355704	ns	less syn
4831	P30835;Q6P783	ATP-dependent 6-phosphofructokinase, liver type;ATP-dependent 6-phosphofructokinase	Pfkl	1.12075e-06	-0.202558	FDR1%	1.69884e-08	0.129774	FDR1%	slower turnover	1.66273e-08	0.313569	FDR1%	0.000886642	0.176139	FDR1%	more syn & less deg
2128	D3ZH36		Elfn2	4.42451e-07	-0.298355	FDR1%	0.0513042	-0.128646	ns	less syn	0.0299077	0.304699	ns	0.16142	0.210826	ns	unchanged
435	U6A022;A0A0G2JZ83;A0A0G2K2D4;G3V9Z5;B0BN79		AGAP3;Agap3	9.32599e-06	-0.298199	FDR1%	0.0268491	0.11964	ns	less syn	0.00147508	0.182755	FDR1%	0.138889	0.108481	ns	more syn
5179	P83732;A0A0H2UH99;M0RBD1	60S ribosomal protein L24	Rpl24;RGD1560821	0.303772	-0.0689514	ns	0.000194413	0.129845	FDR1%	less deg	0.130028	-0.0832849	ns	0.0135056	-0.13175	ns	unchanged
5116	P63074;A0A1W2Q627	Eukaryotic translation initiation factor 4E	Eif4e	0.555682	-0.0597518	ns	0.0147249	0.153822	ns	unchanged	0.772622	-0.0312709	ns	0.157818	0.048442	ns	unchanged
6822	Q7TSA0	Mitochondrial Rho GTPase 2	Rhot2	0.138975	-0.0851852	ns	0.00019354	0.130008	FDR1%	less deg	0.00259776	-0.245503	ns	0.852883	0.0429645	ns	unchanged
5929	Q5RJR8;A0A0G2K6J3	Leucine-rich repeat-containing protein 59	Lrrc59	0.274462	-0.00995903	ns	0.000576105	0.130149	FDR1%	less deg	9.64557e-12	-0.189775	FDR1%	0.0508819	-0.0281245	ns	less syn
535	A0A0G2K0X9;G3V699;Q9Z2Q1;Q9Z2Q1-2	Protein transport protein Sec31A	Sec31a	0.883491	-0.0226576	ns	4.29594e-06	0.130459	FDR1%	less deg	0.0971747	0.0945616	ns	3.79343e-05	0.105038	FDR1%	less deg
2332	D3ZP47		Phpt1	0.0135068	-0.151899	ns	1.43024e-05	0.130802	FDR1%	less deg	0.0869368	0.07587	ns	1.84489e-09	0.171002	FDR1%	less deg
599	A0A0G2K293;D4A2V0;Q9Z0J8	Neuronal growth regulator 1	Negr1	5.25152e-06	-0.296614	FDR1%	0.052059	0.0453256	ns	less syn	0.0120332	-0.194648	ns	0.143152	0.0234451	ns	unchanged
486	Q5U2W0;A0A0G2K016		Sun1	4.23684e-09	-0.29619	FDR1%	0.0238638	0.138607	ns	less syn	NA	NA	NA	NA	NA	NA	NA
3545	F1LVX2		Ehbp1	0.00459842	-0.220787	ns	0.450479	0.0735473	ns	unchanged	0.27709	0.166446	ns	0.00107961	0.187552	FDR1%	less deg
3910	G3V6F5;Q8CGS5	Zinc phosphodiesterase ELAC protein 2	Elac2	0.00967878	-0.108687	ns	0.250533	0.103741	ns	unchanged	0.442925	-0.0640407	ns	0.310673	-0.0369764	ns	unchanged
4591	P07825;A0A0G2KAD8	Synaptophysin	Syp	4.37452e-07	-0.296008	FDR1%	0.164172	0.0224215	ns	less syn	0.688967	-0.059567	ns	1.20366e-07	0.123139	FDR1%	less deg
6891	Q8R3Z7		Ehd4	0.660386	-0.0412358	ns	0.754289	0.052339	ns	unchanged	0.190397	0.0752639	ns	0.723962	0.0475178	ns	unchanged
3953	G3V6U3;Q3B8P6		Alg2	1.46396e-07	-0.188799	FDR1%	1.04603e-05	0.131358	FDR1%	slower turnover	1.45831e-05	-0.190496	FDR1%	0.820455	-0.0417779	ns	less syn
2522	D3ZUV3		Eif2a	0.00451654	-0.0910582	ns	0.238315	0.065409	ns	unchanged	0.000141392	-0.126945	FDR1%	0.0643249	-0.0396215	ns	less syn
6649	Q6P685		Eif2s2	0.610024	-0.0488689	ns	0.15383	0.140353	ns	unchanged	0.0391136	-0.0956193	ns	0.314432	0.0140245	ns	unchanged
3051	D4A9D8	Oxysterol-binding protein	Osbp	0.605754	-0.0212564	ns	0.000426422	0.131369	FDR1%	less deg	0.030209	-0.117913	ns	0.00282369	0.10785	ns	unchanged
2420	D3ZS58	NADH dehydrogenase [ubiquinone] 1 alpha subcomplex subunit 2	Ndufa2	8.19249e-06	-0.294048	FDR1%	0.467605	0.0151616	ns	less syn	0.00023429	-0.272403	FDR1%	0.00275132	-0.0731931	ns	less syn
1520	B2RYG6	Ubiquitin thioesterase OTUB1	Otub1	6.28945e-06	-0.253052	FDR1%	2.40026e-05	0.131463	FDR1%	slower turnover	0.928621	0.032923	ns	4.04618e-07	0.152894	FDR1%	less deg
590	A0A0G2K214	Submitted name: Zinc finger CCCH-type-containing 7B	Zc3h7b	0.0691066	-0.118717	ns	0.00116394	0.131722	FDR1%	less deg	0.0107776	-0.118653	ns	0.697166	-0.0270317	ns	unchanged
3852	F7F3I7;A0A1B0GWL6;A0A1B0GWV9	Submitted name: Semaphorin 4A	Sema4a	0.011769	-0.495593	ns	0.547205	0.0401939	ns	unchanged	0.000971373	0.498094	FDR1%	0.000228536	0.426476	FDR1%	more syn & less deg
4520	O88808	Tubby protein homolog	Tub	1.2636e-05	-0.294027	FDR1%	0.261182	0.0195124	ns	less syn	0.485497	0.02114	ns	0.936838	0.0383311	ns	unchanged
1249	B0BMU7;Q6IUP3	Elongator complex protein 5	Elp5	NA	NA	NA	NA	NA	NA	NA	0.269499	0.0590506	ns	0.00244599	0.160146	ns	unchanged
4513	O88775;A0A0G2JWP4;A0A0G2JU92	Embigin	Emb	0.73013	-0.00500766	ns	0.142607	0.12101	ns	unchanged	0.0450158	-0.240208	ns	0.216047	0.0584725	ns	unchanged
5741	Q5EBC3;G3V6S5;P27653	C-1-tetrahydrofolate synthase, cytoplasmic;Methylenetetrahydrofolate dehydrogenase;Methenyltetrahydrofolate cyclohydrolase;Formyltetrahydrofolate synthetase;C-1-tetrahydrofolate synthase, cytoplasmic, N-terminally processed	Mthfd1	0.0990423	-0.0853562	ns	0.000663314	0.131817	FDR1%	less deg	0.291701	-0.0108491	ns	0.0836265	0.123774	ns	unchanged
6527	Q6AYH6	ER membrane protein complex subunit 10	Emc10	NA	NA	NA	NA	NA	NA	NA	0.0846433	-0.210586	ns	0.757392	-0.0819007	ns	unchanged
5096	P62959;D4A269	Histidine triad nucleotide-binding protein 1	Hint1	0.0017508	-0.199472	FDR1%	0.000480278	0.13227	FDR1%	slower turnover	0.287128	0.0896758	ns	1.24843e-06	0.241965	FDR1%	less deg
1441	B2B9A9		Efnb2	0.000296086	-0.293225	FDR1%	0.871019	-0.0367487	ns	less syn	6.91541e-08	-0.553185	FDR1%	0.0568146	-0.146227	ns	less syn
208	A0A0G2JU77;D4A190		Eif3k	0.0379209	-0.120466	ns	0.998379	0.0850707	ns	unchanged	0.0564101	-0.160669	ns	0.0304456	-0.130798	ns	unchanged
3825	F2Z3Q8;P52296	Importin subunit beta-1	Kpnb1	7.68258e-06	-0.132052	FDR1%	6.64429e-10	0.132976	FDR1%	slower turnover	0.000181312	0.0730217	FDR1%	3.71969e-08	0.12912	FDR1%	more syn & less deg
596	A0A0G2K273;Q641X8	Eukaryotic translation initiation factor 3 subunit E	Eif3e	0.111684	-0.122502	ns	7.20921e-06	0.133	FDR1%	less deg	0.210879	-0.156579	ns	0.0316174	-0.155011	ns	unchanged
5761	Q5FVL2	ER membrane protein complex subunit 8	Emc8	0.686111	-0.0131433	ns	0.00681626	0.125563	ns	unchanged	0.525672	-0.0119586	ns	0.500412	-0.0266003	ns	unchanged
6694	Q6PCU4;Q63190	Emerin	Emd	0.136769	0.0445998	ns	0.405324	0.0358698	ns	unchanged	0.00691166	-0.274874	ns	0.125822	-0.0408927	ns	unchanged
3328	F1LN46;Q3KR63	Carnitine O-palmitoyltransferase 1, brain isoform	Cpt1c	0.00144357	-0.292983	FDR1%	0.0335654	0.108604	ns	less syn	0.990318	-0.0353252	ns	0.243808	-0.054897	ns	unchanged
1602	B2RZ72		Arpc4	1.42359e-05	-0.292861	FDR1%	0.338446	0.0433169	ns	less syn	0.0214035	-0.119451	ns	0.285469	0.0928132	ns	unchanged
6484	Q6AY48		Pcbp3	0.539692	0.0329873	ns	0.000353969	0.133209	FDR1%	less deg	3.08291e-05	-0.321474	FDR1%	0.23905	-0.0792088	ns	less syn
1252	B0BMV5;P70550		Rab8b	0.000543558	-0.292815	FDR1%	0.157012	0.0187138	ns	less syn	0.193307	0.0591001	ns	0.195231	0.0634514	ns	unchanged
4890	P40329	Arginine--tRNA ligase, cytoplasmic	Rars	0.229652	-0.033962	ns	1.00081e-06	0.133505	FDR1%	less deg	0.281227	-0.0318991	ns	0.470314	0.00372287	ns	unchanged
2290	D3ZML2-2;D3ZML2;M9MMM8	Serine/threonine-protein kinase BRSK2	Brsk2	0.474288	-0.14103	ns	0.189302	0.148427	ns	unchanged	0.877107	0.0813923	ns	0.00102473	0.213451	FDR1%	less deg
1694	B5DEN5;Q7TPK5		Eef1b2;Eef1b2l	0.417321	0.0440418	ns	2.54468e-06	0.134063	FDR1%	less deg	0.0228329	-0.114801	ns	0.413882	-0.0172837	ns	unchanged
177	A0A0G2JTL4;Q63116;Q9EQ22;Q9EQ24	Tyrosine-protein kinase receptor	Kit	4.55673e-08	-0.292616	FDR1%	0.728801	0.0243026	ns	less syn	9.68728e-18	0.424564	FDR1%	1.41804e-06	0.221595	FDR1%	more syn & less deg
3528	F1LV13;F1M3D3;Q62826;Q62826-2;A0A0G2JZ75;Q9WV78	Heterogeneous nuclear ribonucleoprotein M;Plasmalemma vesicle-associated protein	Hnrnpm;Plvap	0.000133931	-0.112646	FDR1%	3.13221e-05	0.135053	FDR1%	slower turnover	0.00682168	0.0732157	ns	0.0175124	0.075007	ns	unchanged
5020	P60841-2;P60841	Alpha-endosulfine	Ensa	0.0957308	-0.151917	ns	0.691923	0.101306	ns	unchanged	0.318799	0.0821215	ns	0.547358	0.0936027	ns	unchanged
4441	O35795;O35795-2;Q5RJP4;F1M7N2	Ectonucleoside triphosphate diphosphohydrolase 2	Entpd2	0.837554	0.0504306	ns	0.488791	0.0712779	ns	unchanged	0.896555	-0.0601146	ns	0.593871	-0.0152991	ns	unchanged
4232	M0R402	Formin-like 1	Tmx3	0.128129	-0.0772644	ns	0.0089246	0.155152	ns	unchanged	1.27528e-08	-0.369799	FDR1%	0.604521	-0.0484354	ns	less syn
2578	D3ZWF5	Glutamic--pyruvic transaminase 2	Eny2	0.759309	0.0410423	ns	0.250172	0.0757285	ns	unchanged	0.753085	0.00544695	ns	0.194763	0.107761	ns	unchanged
3366	F1LPB8;Q6P6S9	Ectonucleoside triphosphate diphosphohydrolase 5	Entpd5	0.0163588	0.178275	ns	0.0297401	0.152742	ns	unchanged	1.20306e-06	-0.369219	FDR1%	0.401841	-0.0341337	ns	less syn
4595	P08009;A0A0G2K4U2	Glutathione S-transferase Yb-3	Gstm3	5.73537e-05	-0.484532	FDR1%	0.000672599	0.136254	FDR1%	slower turnover	0.0625097	0.23769	ns	0.0375816	0.114252	ns	unchanged
2674	D3ZZ44		Elfn1	NA	NA	NA	NA	NA	NA	NA	1.65764e-08	-0.481149	FDR1%	0.918213	0.00927021	ns	less syn
4593	P07936	Neuromodulin	Gap43	0.14591	-0.0721565	ns	0.0746565	0.0463568	ns	unchanged	0.0941278	-0.0752959	ns	1.48963e-09	0.21203	FDR1%	less deg
109	A0A0G2JSJ3;A0A0G2JVB0;Q07647;A0A0G2JX37;Q6P506	Solute carrier family 2, facilitated glucose transporter member 3	Slc2a3	5.60458e-08	-0.291782	FDR1%	0.794762	0.00443046	ns	less syn	0.889116	-0.0184728	ns	1.15587e-08	0.133425	FDR1%	less deg
3740	F1M863;Q91Z80;Q562A3	Liprin-alpha-4	Ppfia4	0.00106536	-0.291713	FDR1%	0.365044	-0.0710268	ns	less syn	0.0974834	-0.273439	ns	0.722264	0.0406836	ns	unchanged
4981	P54758;F1LQK6	Ephrin type-A receptor 6	Epha6	0.00962148	-0.255814	ns	0.409163	0.136133	ns	unchanged	0.0623699	-0.168888	ns	0.287178	-0.103579	ns	unchanged
7012	Q9ESH6	Glutaredoxin-1	Glrx	0.0502576	-0.177843	ns	0.0678928	0.12616	ns	unchanged	0.00175919	0.47355	FDR1%	7.54847e-07	0.33292	FDR1%	more syn & less deg
4588	P07687;F1LTS8	Epoxide hydrolase 1	Ephx1	0.525951	-0.0790853	ns	0.00606091	0.130403	ns	unchanged	3.94856e-08	0.237159	FDR1%	0.64236	0.0401931	ns	more syn
5170	P80299;Q5RKK3	Bifunctional epoxide hydrolase 2;Cytosolic epoxide hydrolase 2;Lipid-phosphate phosphatase	Ephx2	NA	NA	NA	NA	NA	NA	NA	0.778966	-0.0324022	ns	0.152855	0.0978427	ns	unchanged
6496	Q6AY71	Protein C8orf37 homolog	unknown	0.0228915	-0.168147	ns	0.0367689	0.122177	ns	unchanged	0.0202868	0.172101	ns	5.01527e-06	0.21166	FDR1%	less deg
1111	A0A140TAC3;O88339	Epsin-1	Epn1	0.00805647	-0.116428	ns	0.891116	0.0248717	ns	unchanged	0.0961417	-0.13365	ns	0.00255132	-0.0886768	ns	unchanged
3618	F1M0J7		Prickle2	2.77622e-09	-0.291551	FDR1%	0.025594	0.203698	ns	less syn	0.0219796	0.119856	ns	0.337886	0.0372829	ns	unchanged
1049	A0A0H2UHQ1;F1LZX7;P24049;D3Z9G9;Q7TPJ7		Rpl17;RGD1560017;RGD1359290	0.973959	0.0460902	ns	0.00094396	0.136438	FDR1%	less deg	0.0796203	-0.0998731	ns	0.237709	-0.0691602	ns	unchanged
1745	B5DFB4;F1LUY5;A0A0G2JXJ6		Ttc7b	0.0014717	-0.224317	FDR1%	0.000150938	0.136762	FDR1%	slower turnover	0.0250282	-0.249869	ns	0.325413	0.018314	ns	unchanged
632	A0A0G2K2Y3;Q4KMA8;Q9JJ22-2;Q9JJ22	Endoplasmic reticulum aminopeptidase 1	Erap1	0.987255	-0.116112	ns	0.0589244	0.120932	ns	unchanged	0.90902	-0.0739156	ns	0.432107	-0.0309733	ns	unchanged
2565	D3ZW55	Inosine triphosphate pyrophosphatase	Itpa	0.0884199	-0.0927183	ns	6.91939e-05	0.136825	FDR1%	less deg	0.587861	0.0637403	ns	0.000173551	0.188992	FDR1%	less deg
5254	Q02356;A0A0G2K3U1	AMP deaminase 2	Ampd2	6.96704e-05	-0.29143	FDR1%	0.6337	-0.0397056	ns	less syn	0.499669	-0.0744181	ns	0.213716	0.110226	ns	unchanged
5148	P68511;A0A0G2K2B8	14-3-3 protein eta	Ywhah	1.19627e-20	-0.432584	FDR1%	0.00045885	0.136863	FDR1%	slower turnover	0.629485	-0.0665547	ns	0.0256771	-0.0976156	ns	unchanged
6373	Q66HA8	Heat shock protein 105 kDa	Hsph1	0.000133852	-0.137107	FDR1%	5.00736e-08	0.136864	FDR1%	slower turnover	7.85342e-08	-0.155176	FDR1%	0.0217703	0.07688	ns	less syn
4212	H1UBN0;D3ZWR4		Cpne7	7.63736e-06	-0.30787	FDR1%	1.08464e-05	0.136968	FDR1%	slower turnover	3.01372e-05	-0.334116	FDR1%	0.00014832	0.0667314	FDR1%	slower turnover
5829	Q5M7V8	Thyroid hormone receptor-associated protein 3	Thrap3	0.000214346	-0.289807	FDR1%	0.0599488	0.19935	ns	less syn	0.899473	0.0278499	ns	0.35715	-0.060572	ns	unchanged
1503	B2RYA8;D4ABC2		Dnajb2	0.000308227	-0.289737	FDR1%	0.0285738	0.154788	ns	less syn	1.65914e-05	-0.277892	FDR1%	0.219783	0.0943227	ns	less syn
2172	D3ZIE9		Aldh18a1	0.0871141	0.00934766	ns	1.70636e-07	0.137086	FDR1%	less deg	0.00134297	-0.0943179	FDR1%	0.000305315	-0.121185	FDR1%	less syn & more deg
1722	B5DF41	Syntaphilin	Snph	0.000231928	-0.289528	FDR1%	0.657527	0.0108524	ns	less syn	0.110048	-0.0365401	ns	0.112794	0.0834615	ns	unchanged
125	A0A0G2JSM8	Submitted name: Cell division control protein 42 homolog	Cdc42	7.19957e-07	-0.288895	FDR1%	0.103322	0.0841707	ns	less syn	0.0183719	-0.219853	ns	9.1409e-05	0.144344	FDR1%	less deg
4961	P52555	Endoplasmic reticulum resident protein 29	Erp29	0.00466137	-0.132686	ns	0.418512	0.0143652	ns	unchanged	0.00748143	-0.152676	ns	0.000118938	-0.11429	FDR1%	more deg
2733	D4A0W1		Emc4	0.124811	-0.0845374	ns	0.179512	0.199582	ns	unchanged	0.0262334	-0.104728	ns	0.466516	0.0466017	ns	unchanged
98	A0A0F7RQL3;P30904;D3ZE63;D4A3P7;F1LTZ6	Macrophage migration inhibitory factor	Mif;LOC679748;RGD1560513;RGD1559921	0.339211	-0.174247	ns	0.738655	0.0513428	ns	unchanged	0.890575	-0.00648159	ns	4.53242e-10	0.210604	FDR1%	less deg
2193	D3ZJ32	IQ motif and Sec7 domain 1	Esyt2	0.616568	-0.0901475	ns	0.0144511	0.130383	ns	unchanged	0.237541	-0.0688952	ns	0.0331619	0.0703604	ns	unchanged
6139	Q5XIP0		Dnajb4	0.00111628	-0.321103	FDR1%	0.000380123	0.137606	FDR1%	slower turnover	1.09989e-07	-0.421866	FDR1%	0.88293	0.012044	ns	less syn
3129	D4ABX9		Emc6	0.58095	0.020028	ns	0.179897	0.102491	ns	unchanged	0.265782	-0.0214492	ns	0.157729	-0.193846	ns	unchanged
1765	B5DFJ4		Vps18	0.147526	-0.15033	ns	0.000937043	0.137828	FDR1%	less deg	0.731453	0.0266866	ns	0.0863924	0.0563574	ns	unchanged
6383	Q66HF3;Q6UPE1	Electron transfer flavoprotein-ubiquinone oxidoreductase, mitochondrial	Etfdh	0.26724	-0.0876057	ns	0.911011	-0.00593367	ns	unchanged	0.0976879	-0.0817338	ns	0.155258	-0.0275489	ns	unchanged
3664	F1M3W5		Dmxl2	5.00439e-13	-0.288299	FDR1%	0.0733273	0.0242902	ns	less syn	0.560357	0.0118073	ns	1.56151e-07	0.0943256	FDR1%	less deg
2072	D3ZF54	Anoctamin	Ano10	0.00491625	-0.13289	ns	0.143465	0.116033	ns	unchanged	4.65851e-11	-0.362525	FDR1%	0.0462778	-0.085253	ns	less syn
2386	D3ZQR6		Eml6	0.767409	-0.0362128	ns	0.0553545	-0.0723137	ns	unchanged	NA	NA	NA	NA	NA	NA	NA
6045	Q5XHX3;A0A0G2K6I4		Enah	0.00337215	-0.124883	ns	0.85385	-0.00266945	ns	unchanged	0.125277	-0.154013	ns	0.545471	0.00215071	ns	unchanged
4887	P39069;A0A0G2K7Q6;M0RC66	Adenylate kinase isoenzyme 1	Ak1	0.0739687	-0.11523	ns	5.95047e-06	0.138482	FDR1%	less deg	0.754787	0.000663288	ns	3.53697e-13	0.236798	FDR1%	less deg
3302	F1LMB9;O54921;A0A0G2K888;A0A0G2K1K8	Exocyst complex component 2	Exoc2	0.0173536	-0.140372	ns	0.00665595	0.117507	ns	unchanged	0.765352	-0.0524126	ns	0.309819	0.0681821	ns	unchanged
4076	G3V874;Q9JMB2		Epb41l3	0.109628	-0.20213	ns	0.37947	-0.154242	ns	unchanged	0.215328	-0.234822	ns	0.112138	0.126151	ns	unchanged
2308	D3ZN27		Dnajc13	0.00823459	-0.136873	ns	6.01481e-09	0.138576	FDR1%	less deg	0.915143	0.00717624	ns	0.000482398	0.115072	FDR1%	less deg
594	A0A0G2K249;Q5RKH1	Serine/threonine-protein kinase PRP4 homolog	Prpf4b	7.21002e-07	-0.286984	FDR1%	0.00322405	0.17177	ns	less syn	0.734229	0.0397796	ns	0.467871	-0.107823	ns	unchanged
885	G3V743;A0A0G2K8S6;O88941	Mannosyl-oligosaccharide glucosidase	Mogs	0.362779	-0.0825574	ns	0.000122918	0.138644	FDR1%	less deg	0.0275946	-0.121283	ns	0.90846	0.0279344	ns	unchanged
4462	O54922	Exocyst complex component 7	Exoc7	0.0897553	-0.125191	ns	0.00346728	0.0928711	ns	unchanged	0.138566	-0.0685167	ns	0.475256	0.0487167	ns	unchanged
2443	D3ZSZ4		Pgbd5	0.00202014	-0.286114	FDR1%	0.0199332	0.165997	ns	less syn	0.597379	-0.0761979	ns	9.14189e-05	0.244766	FDR1%	less deg
3767	F1M9A7;Q63448	Acyl-coenzyme A oxidase;Peroxisomal acyl-coenzyme A oxidase 3	Acox3	0.0416979	-0.149822	ns	0.00144967	0.138822	FDR1%	less deg	0.213382	0.0729851	ns	0.00768975	0.195746	ns	unchanged
863	A0A0G2K890;P31977	Ezrin	Ezr	0.335138	-0.074888	ns	0.490261	-0.0792691	ns	unchanged	0.193492	-0.077243	ns	0.517351	0.103009	ns	unchanged
5502	Q4G079		Aimp1	0.681927	-0.01875	ns	0.000238895	0.138875	FDR1%	less deg	0.168629	-0.0776547	ns	0.944078	-0.0370218	ns	unchanged
1442	B2CZC8;P31424;P31424-2;A0A0H2UHN1;A0A0H2UHW6	Metabotropic glutamate receptor 5	Grm5	2.49223e-11	-0.285929	FDR1%	0.248322	0.0740081	ns	less syn	0.103403	0.031258	ns	7.40023e-05	0.17828	FDR1%	less deg
4585	P07483	Fatty acid-binding protein, heart	Fabp3	0.00623234	-0.301378	ns	0.242814	0.0335405	ns	unchanged	1.14526e-14	-1.18332	FDR1%	4.13761e-07	0.112643	FDR1%	slower turnover
3465	F1LRY8;Q63366;F1LWT9	Neurexophilin-1;Neurexophilin	Nxph1;Nxph2	NA	NA	NA	NA	NA	NA	NA	1.56646e-05	-0.361544	FDR1%	0.0435212	-0.142272	ns	less syn
4986	P55051	Fatty acid-binding protein, brain	Fabp7	0.675326	0.00160638	ns	0.472244	-0.00647569	ns	unchanged	0.175056	0.0381401	ns	0.0215605	0.0792868	ns	unchanged
6674	Q9QZF6;Q6P7C7	Transmembrane glycoprotein NMB	Gpnmb	0.245169	0.0338225	ns	0.00877449	0.133072	ns	unchanged	0.000760646	0.469233	FDR1%	0.000588513	0.245825	FDR1%	more syn & less deg
4780	P22062;A0A140TAB9	Protein-L-isoaspartate(D-aspartate) O-methyltransferase	Pcmt1	0.000100321	-0.28571	FDR1%	0.709035	0.014269	ns	less syn	0.151492	0.129112	ns	0.0472547	0.147625	ns	unchanged
4325	M0R9T2		Erbb2ip	0.301603	0.225612	ns	0.187466	0.204738	ns	unchanged	NA	NA	NA	NA	NA	NA	NA
162	A0A0G2JTA0;Q5BK32	FAS-associated factor 2	Faf2	0.140461	-0.0917907	ns	0.233531	0.0459399	ns	unchanged	0.0191264	-0.063269	ns	0.236423	-0.000548583	ns	unchanged
6547	Q6AYQ8	Acylpyruvase FAHD1, mitochondrial	Fahd1	0.00705055	-0.140927	ns	0.10639	-0.0548887	ns	unchanged	0.578968	0.00691397	ns	0.0262748	-0.0505624	ns	unchanged
6290	Q63827;F1LM54;Q04589;Q62992	Fibroblast growth factor receptor;Fibroblast growth factor receptor 1	Fgfr1;Fgfr1-ps1	0.00354018	-0.20392	ns	0.272869	0.0578999	ns	unchanged	3.34535e-06	-0.360452	FDR1%	0.0161592	-0.153608	ns	less syn
3514	F1LU48		Ergic1	0.368815	-0.108182	ns	0.00450157	0.171676	ns	unchanged	9.32906e-05	-0.32669	FDR1%	0.64516	-0.00645245	ns	less syn
417	A0A0G2JYN4;Q5XIS4		Ergic2	0.23424	-0.120241	ns	0.00321949	0.211863	ns	unchanged	0.033084	-0.1428	ns	0.765035	0.0280373	ns	unchanged
812	A0A0G2K761;D4A0H4		Cul2	0.0962687	-0.191211	ns	5.48301e-06	0.138878	FDR1%	less deg	0.338632	0.000966861	ns	0.0568076	0.120492	ns	unchanged
4668	P11951;P11950;Q78EE8;Q9Z1G9	Cytochrome c oxidase subunit 6C-2;Cytochrome c oxidase subunit 6C-1	Cox6c2;Cox6c1;COVIc;Cox6c	8.64091e-08	-0.28539	FDR1%	0.30968	-0.0473637	ns	less syn	5.41884e-06	-0.31282	FDR1%	0.072985	-0.0929699	ns	less syn
1192	A1L108;A1L108-2	Actin-related protein 2/3 complex subunit 5-like protein	Arpc5l	0.000709782	-0.284994	FDR1%	0.771263	3.56164e-05	ns	less syn	0.955709	0.00295731	ns	0.782184	0.0509641	ns	unchanged
1410	B1WBY7		Erlin1	0.0369676	-0.134637	ns	0.0345888	0.0743845	ns	unchanged	3.3154e-05	-0.223559	FDR1%	0.121217	-0.162261	ns	less syn
3323	F1LMZ8	26S proteasome non-ATPase regulatory subunit 11	Psmd11	0.0049631	-0.116441	ns	0.000266543	0.138955	FDR1%	less deg	0.0416467	-0.172363	ns	0.00979145	0.0759743	ns	unchanged
6038	Q5VLR5		Erp44	0.12602	-0.0618212	ns	0.180221	0.0421519	ns	unchanged	0.0228039	-0.189038	ns	0.48149	-0.0471245	ns	unchanged
4697	P14562;A0A0U1RRS9	Lysosome-associated membrane glycoprotein 1	Lamp1	0.707078	-0.00388046	ns	3.61862e-06	0.138994	FDR1%	less deg	4.91859e-09	0.199374	FDR1%	2.39039e-06	0.1581	FDR1%	more syn & less deg
5555	Q4QQV3;A0A0G2JWV2;Q63571;D4ADP1	Protein FAM162A	Fam162a	0.791479	-0.144975	ns	0.674963	-0.00254712	ns	unchanged	0.243118	-0.166817	ns	0.251605	0.0590236	ns	unchanged
1269	B0BN30;A0A1W2Q6G8;Q4G025		Mtch1	1.99317e-06	-0.284939	FDR1%	0.320108	0.0630616	ns	less syn	0.301428	-0.0405697	ns	0.270425	0.0517066	ns	unchanged
1324	B0BNJ4		Ethe1	0.112411	-0.121322	ns	0.422615	-0.0161847	ns	unchanged	0.403982	-0.076978	ns	0.420821	-0.0627974	ns	unchanged
4250	M0R5H1		Etl4	0.205495	-0.15747	ns	0.480545	-0.0413002	ns	unchanged	7.37743e-08	-0.638887	FDR1%	0.37337	0.0538872	ns	less syn
856	A0A0G2K850;B1WC50;A0A140UHY3;Q4KM41		Ewsr1	0.0740751	-0.0180928	ns	0.153576	0.0982377	ns	unchanged	0.87868	0.00319384	ns	0.82556	-0.011536	ns	unchanged
1451	B2GUW4		Exd2	0.041669	-0.140153	ns	0.0117244	0.228215	ns	unchanged	0.0724841	0.100769	ns	0.106806	0.0733341	ns	unchanged
4015	G3V7J1;Q8R553	Calsyntenin-3	Clstn3	0.792608	-0.00496794	ns	0.00286833	0.294943	ns	unchanged	3.88851e-07	-0.356612	FDR1%	0.181364	-0.0828499	ns	less syn
6126	Q5XIJ4	Protein FAM210A	Fam210a	0.883616	-0.0784583	ns	0.979454	-0.0687948	ns	unchanged	0.688628	-0.0412525	ns	0.996861	-0.0531746	ns	unchanged
6464	Q6AXX6	Redox-regulatory protein FAM213A	Fam213a	0.371947	-0.139156	ns	0.00506547	0.137438	ns	unchanged	0.25137	-0.181862	ns	0.551328	-0.0175333	ns	unchanged
4132	Q4QQS4;G3V8T5		Ruvbl2	0.0138268	-0.0823644	ns	1.99788e-06	0.139162	FDR1%	less deg	0.388532	-0.0264521	ns	0.0240289	0.0670169	ns	unchanged
1020	A0A0H2UHC0;F1LQX4-3;F1LQX4-2;F1LQX4	Rho GTPase-activating protein 44	Arhgap44	0.00272826	-0.284621	FDR1%	0.253422	0.0199398	ns	less syn	0.300543	0.0486736	ns	0.155251	0.0432118	ns	unchanged
5611	Q4V8H2;F1LQN9;A0A0G2JYT4		Exoc1	0.0215136	-0.200221	ns	0.0543303	0.0894154	ns	unchanged	0.217592	-0.135735	ns	0.601205	0.0176092	ns	unchanged
5429	Q3T1K5	F-actin-capping protein subunit alpha-2	Capza2	2.50004e-09	-0.283844	FDR1%	0.00820978	0.0402352	ns	less syn	0.0217062	-0.0792188	ns	0.0145218	0.0619041	ns	unchanged
5686	Q5BJQ2	Protein FAM63A	Fam63a	NA	NA	NA	NA	NA	NA	NA	0.402821	-0.0933765	ns	0.884564	0.0287179	ns	unchanged
3518	F1LUB7;Q6RVG2-3;Q6RVG2-2;Q6RVG2	Anion exchange protein;Electroneutral sodium bicarbonate exchanger 1	Slc4a8	0.000416276	-0.283551	FDR1%	0.0341042	0.208666	ns	less syn	0.145804	-0.135015	ns	7.90005e-08	-0.53101	FDR1%	more deg
419	A0A0G2JYR1;B5DEY3		Exoc6b	0.874034	-0.0313636	ns	0.78943	0.141039	ns	unchanged	0.751054	-0.0291061	ns	0.358724	0.0675602	ns	unchanged
6806	Q7TP54;P02793;M0R6L9;M0R5T8;F1M5T1;M0R597;M0RCS3;D4ADM5	Protein FAM65B;Ferritin light chain 1;Ferritin	Fam65b;Ftl1;RGD1560687;RGD1566189;LOC100359668;LOC100362384;Ftl1l1;LOC680217	0.838939	-0.0315293	ns	0.731454	-0.0639932	ns	unchanged	0.11905	0.125877	ns	0.0183092	0.249552	ns	unchanged
2482	D3ZTW9		Exog	0.233696	-0.135388	ns	0.0569954	-0.0633968	ns	unchanged	0.988748	-0.089015	ns	0.546712	0.0168907	ns	unchanged
4381	M0RDU0		F8a1	0.0221605	-0.221377	ns	0.181431	0.0488114	ns	unchanged	0.0114051	-0.356811	ns	0.889433	0.0425658	ns	unchanged
1972	D3ZC89		Fam114a2	0.243733	-0.160682	ns	0.147083	-0.0564923	ns	unchanged	0.303373	-0.0918302	ns	0.968783	0.098553	ns	unchanged
5776	Q5FWT1	Protein FAM98A	Fam98a	0.855566	0.0534776	ns	0.0924448	0.1067	ns	unchanged	0.0877674	-0.147843	ns	0.0518756	-0.0735199	ns	unchanged
5091	P62914;Q4V8I6;A0A0G2K3Y8	60S ribosomal protein L11	Rpl11	0.590053	0.0284066	ns	6.12624e-05	0.13917	FDR1%	less deg	0.396058	-0.0460079	ns	0.0216731	-0.144257	ns	unchanged
4675	P12711	Alcohol dehydrogenase class-3	Adh5	0.211721	-0.154916	ns	0.224639	0.0656198	ns	unchanged	0.0289711	0.2562	ns	0.000538864	0.207243	FDR1%	less deg
1212	A2VCX1	TIP41-like protein	Tiprl	0.0736041	-0.182157	ns	0.0585947	0.183928	ns	unchanged	0.00219779	0.220486	ns	1.59017e-06	0.206875	FDR1%	less deg
5631	Q505J8	Phenylalanine--tRNA ligase alpha subunit	Farsa	0.550081	-0.0719031	ns	0.00885794	0.135632	ns	unchanged	0.478875	-0.0287589	ns	0.0852714	-0.187654	ns	unchanged
875	A0A0G2K8J8;D4AE88		Fam120b	0.121826	-0.349232	ns	0.334612	0.0469336	ns	unchanged	0.298152	-0.0179558	ns	0.609041	0.0276431	ns	unchanged
795	A0A0G2K6X6;O08679	Serine/threonine-protein kinase MARK2	Mark2	0.000235859	-0.281545	FDR1%	0.0441031	0.107932	ns	less syn	0.208351	-0.116089	ns	0.860524	-0.083796	ns	unchanged
1036	A0A0H2UHK3;Q5M7V7	FAST kinase domain-containing protein 2	Fastkd2	0.839529	-0.0474664	ns	0.571237	-0.066439	ns	unchanged	0.550417	-0.00712875	ns	0.261914	-0.0330754	ns	unchanged
1892	D3Z9L0		Agk	1.17126e-05	-0.281527	FDR1%	0.738511	-0.00226616	ns	less syn	5.97973e-10	-0.334235	FDR1%	0.593362	-0.00665304	ns	less syn
4782	P22509	rRNA 2-O-methyltransferase fibrillarin	Fbl	0.761244	0.00472836	ns	0.0820894	0.152134	ns	unchanged	0.70039	0.0317889	ns	0.0803893	0.0885423	ns	unchanged
5578	Q4V7D4		Fam126b	0.202652	-0.0446124	ns	0.816585	0.042454	ns	unchanged	2.97769e-12	-0.472022	FDR1%	0.310384	0.0106709	ns	less syn
5637	Q561K2;Q8R417;Q62918;C8CB44;A1E5S7	Protein kinase C-binding protein NELL2	Nell2	3.11383e-06	-0.281056	FDR1%	0.0715936	0.174808	ns	less syn	0.304169	-0.0991408	ns	0.597005	0.000297579	ns	unchanged
1080	A0A0H2UI14;Q9QZH7	F-box/LRR-repeat protein 20	Fbxl20	0.572693	-0.0260026	ns	0.00527922	0.16758	ns	unchanged	0.772674	-0.0417986	ns	0.608744	0.0537688	ns	unchanged
1494	B2GV94		Fam134c	0.00861948	-0.194591	ns	0.0696149	0.120075	ns	unchanged	0.0983095	0.0560294	ns	0.384235	0.12286	ns	unchanged
3121	D4ABP9	F-box only protein 3	Fbxo3	0.00303985	-0.271457	ns	0.00285521	0.133483	ns	unchanged	0.0685831	0.0801465	ns	0.0367406	0.120867	ns	unchanged
1198	V9GZ87;A1L1K4	CDC42 small effector protein 2	LOC100362023;Cdc42se2	0.00142576	-0.281046	FDR1%	0.632725	-0.0895382	ns	less syn	0.487132	-0.123065	ns	0.369039	0.12611	ns	unchanged
4049	G3V7V9;Q6P4Z6	Leucine carboxyl methyltransferase 1	Lcmt1	0.0343351	-0.122927	ns	0.0187833	0.240826	ns	unchanged	0.508901	0.135728	ns	0.000314749	0.205585	FDR1%	less deg
6400	Q66X93;D4A8Y5	Staphylococcal nuclease domain-containing protein 1	Snd1	2.19138e-05	-0.14787	FDR1%	1.82893e-05	0.13919	FDR1%	slower turnover	0.0148525	-0.110389	ns	0.0170287	-0.118198	ns	unchanged
2450	D3ZT47		Fam171a2	0.0244994	-0.219861	ns	0.529296	-0.00555643	ns	unchanged	0.000102065	0.363649	FDR1%	0.603372	0.085141	ns	more syn
2658	D3ZYR1	F-BAR domain only protein 2	Fcho2	0.101125	-0.183248	ns	0.306961	0.000936991	ns	unchanged	0.124954	-0.0659278	ns	0.671151	-0.000314144	ns	unchanged
1290	B0BN97;Q498E0	Thioredoxin domain-containing protein 12	Txndc12	0.494652	-0.0461819	ns	0.930505	-0.0374175	ns	unchanged	3.05277e-12	-0.351942	FDR1%	0.0691551	-0.100681	ns	less syn
2855	D4A415		Fam175b	0.0324643	-0.262449	ns	0.124573	0.0855766	ns	unchanged	0.498798	-0.00801704	ns	0.526609	0.0189656	ns	unchanged
4994	P56522	NADPH:adrenodoxin oxidoreductase, mitochondrial	Fdxr	0.460912	0.086967	ns	0.591306	-0.0102849	ns	unchanged	0.799572	-0.0821935	ns	0.224816	-0.0158045	ns	unchanged
1949	D3ZBM3	Ferrochelatase	Fech	0.00525724	-0.154661	ns	0.915099	-0.019551	ns	unchanged	0.00447903	-0.120086	ns	0.36293	-0.0318381	ns	unchanged
2179	D3ZIM7		Fam177a1	0.151775	0.033432	ns	0.641234	0.063562	ns	unchanged	0.177151	-0.0371037	ns	0.883116	-0.0377638	ns	unchanged
3306	F1LMH0;Q9WU34;Q9WU34-3;Q9WU34-2	Neuronal-specific septin-3	Sept3	1.35802e-05	-0.280974	FDR1%	0.181271	-0.0146368	ns	less syn	0.0427324	-0.1259	ns	0.000305501	0.113498	FDR1%	less deg
7038	Q9JIX3	Bis(5-adenosyl)-triphosphatase	Fhit	0.341649	-0.0599323	ns	0.98451	0.0668751	ns	unchanged	NA	NA	NA	NA	NA	NA	NA
1395	M0RDY2;B1WBS7		Fam185a	0.0342047	-0.167462	ns	0.0179699	-0.110566	ns	unchanged	NA	NA	NA	NA	NA	NA	NA
2529	D3ZUZ4		Fam20b	0.0127798	-0.17617	ns	0.0087425	0.305726	ns	unchanged	0.000613607	-0.357596	FDR1%	0.657308	-0.0440597	ns	less syn
1254	B0BMW0;P61107;A0A1B0GWR3	Cell division control protein 42 homolog	Rab14	1.74018e-06	-0.147385	FDR1%	0.000187705	0.139431	FDR1%	slower turnover	2.31543e-05	-0.120572	FDR1%	0.370294	0.0495038	ns	less syn
6880	Q8K3X8	Heat shock factor-binding protein 1	Hsbp1	0.00200884	-0.280618	FDR1%	0.346259	0.0368314	ns	less syn	0.752647	0.0441388	ns	0.38441	0.0913863	ns	unchanged
1553	B2RYQ2	Serine/threonine-protein phosphatase 2A activator	Ppp2r4	0.00776543	-0.220943	ns	0.0738515	0.0862243	ns	unchanged	0.308669	-0.0044442	ns	0.000163408	0.205574	FDR1%	less deg
1463	B2GUZ9		Fam49b	0.00456701	-0.232075	ns	0.0048581	0.117001	ns	unchanged	0.0128981	-0.174918	ns	1.71016e-08	0.184127	FDR1%	less deg
3200	D4AE06;D4A6E5	Peptidyl-prolyl cis-trans isomerase	Fkbp15	0.310472	-0.0808281	ns	0.667606	0.0319259	ns	unchanged	0.924243	0.00413522	ns	0.362085	0.0352547	ns	unchanged
2568	D3ZWA1		Fam63b	0.0979716	-0.144448	ns	0.466782	0.0947546	ns	unchanged	3.75001e-05	-0.31119	FDR1%	0.334233	-0.101145	ns	less syn
5206	P97534	Peptidyl-prolyl cis-trans isomerase FKBP1B	Fkbp1b	0.0088775	-0.24235	ns	0.261378	-0.0892455	ns	unchanged	0.00806947	-0.174925	ns	0.433544	0.0650084	ns	unchanged
2699	D3ZZR9	Peptidyl-prolyl cis-trans isomerase	Fkbp2	0.00556127	-0.0663349	ns	0.293121	-0.0350529	ns	unchanged	4.70811e-10	-0.382311	FDR1%	0.000201937	-0.133017	FDR1%	less syn & more deg
1714	B5DF03;G3V6L9	Peptidyl-prolyl cis-trans isomerase	Fkbp3	0.0410399	-0.171391	ns	0.499649	-0.0400909	ns	unchanged	0.126458	-0.0967372	ns	0.0420411	0.188304	ns	unchanged
3686	F1M5M9		Srgap3	5.05529e-09	-0.280075	FDR1%	0.2931	0.044609	ns	less syn	2.46379e-22	0.589821	FDR1%	2.75724e-05	0.20847	FDR1%	more syn & less deg
5766	Q5FVM4	Non-POU domain-containing octamer-binding protein	Nono	0.00056992	-0.154329	FDR1%	0.000566315	0.139488	FDR1%	slower turnover	0.769232	-0.00106982	ns	0.922895	-0.0125755	ns	unchanged
5576	Q4V7D2	Protein rogdi homolog	Rogdi	9.16208e-05	-0.277607	FDR1%	0.364825	0.04282	ns	less syn	0.606127	-0.0158044	ns	0.00307123	0.105504	ns	unchanged
967	D3Z899;A0A0G2KAE6		Fam73b	0.410033	-0.069826	ns	0.00790587	0.0983377	ns	unchanged	1.02417e-05	-0.198922	FDR1%	0.101854	-0.0783554	ns	less syn
1547	B2RYP3		Fam91a1	0.0184538	-0.121988	ns	0.195136	0.0936642	ns	unchanged	0.00623016	0.180806	ns	0.480363	0.0297828	ns	unchanged
3198	D4AE02		Fam98b	0.558343	-0.144184	ns	0.180565	0.0973508	ns	unchanged	0.0837769	-0.190494	ns	0.531975	0.0201716	ns	unchanged
4502	O88506;A0A0G2K007	STE20/SPS1-related proline-alanine-rich protein kinase	Stk39	0.000548492	-0.183232	FDR1%	0.000617471	0.139709	FDR1%	slower turnover	8.51755e-07	-0.303239	FDR1%	1.71434e-05	0.169861	FDR1%	slower turnover
6422	Q68FT7		Farsb	0.883517	0.0074185	ns	0.00652228	0.140368	ns	unchanged	0.895213	0.0180223	ns	0.58847	-0.0371769	ns	unchanged
423	A0A0G2JYU6	Submitted name: Formin-like 1	Fmnl1	0.463543	0.152925	ns	0.212705	-0.0752824	ns	unchanged	0.481726	-0.012531	ns	0.0338181	-0.168418	ns	unchanged
540	A0A0G2K132	Submitted name: Formin-like 2	Fmnl2	0.564717	0.0842994	ns	0.0130935	0.136111	ns	unchanged	0.675433	-0.00099498	ns	0.601524	0.0231722	ns	unchanged
2042	D3ZEH1		Fat4	0.00587549	-0.224506	ns	0.509699	-0.0251103	ns	unchanged	0.278309	0.0769265	ns	0.0667526	0.11687	ns	unchanged
5337	Q2HWF0-3;Q2HWF0;Q2HWF0-2	Formin-binding protein 1-like	Fnbp1l	NA	NA	NA	NA	NA	NA	NA	0.0366444	0.133262	ns	0.231369	0.0633476	ns	unchanged
5961	Q5RKJ4;Q04631	Protein farnesyltransferase/geranylgeranyltransferase type-1 subunit alpha	Fnta	0.0934883	-0.184426	ns	0.00669043	0.115342	ns	unchanged	NA	NA	NA	NA	NA	NA	NA
4038	G3V7S0;P70627;B5DF85;D4A2Y7	Glutamate carboxypeptidase 2	Folh1;Naalad2	0.901428	-0.0311997	ns	0.27736	0.0703258	ns	unchanged	0.925777	-0.00250109	ns	0.0282395	0.0747739	ns	unchanged
2538	D3ZVA5		Fbll1	0.371229	-0.130673	ns	0.0310987	0.167259	ns	unchanged	0.822734	0.000602072	ns	0.356235	0.0784578	ns	unchanged
3989	Q9Z1X8;G3V774		Fbxo2	0.201495	-0.100875	ns	0.0617053	0.0364432	ns	unchanged	0.000230246	-0.264057	FDR1%	0.619069	-0.0502318	ns	less syn
4402	O08816;F1LSG0	Neural Wiskott-Aldrich syndrome protein	Wasl	1.59157e-06	-0.277205	FDR1%	0.272553	0.11043	ns	less syn	4.30429e-06	-0.283532	FDR1%	0.0777398	-0.0368982	ns	less syn
1002	A0A0G2QC02;Q6MG76		Skiv2l	0.0054902	-0.158615	ns	0.000668246	0.140189	FDR1%	less deg	0.205182	-0.0774139	ns	0.317032	0.0695538	ns	unchanged
263	A0A0G2JVE0;D3ZXC6;Q5U4E5;F1LMH8		Fbxw11;Btrc	0.13455	-0.0858124	ns	0.242105	0.0843372	ns	unchanged	0.357584	0.104909	ns	0.798387	-0.0594422	ns	unchanged
644	B6RIU0;A0A0G2K376;Q5U317	Pre-mRNA 3-end-processing factor FIP1	Fip1l1	0.00145963	-0.27664	FDR1%	0.589903	-0.0889834	ns	less syn	0.0639697	-0.124981	ns	0.625468	-0.0559981	ns	unchanged
2934	D4A634		Ranbp6	5.1884e-07	-0.276513	FDR1%	0.0120026	0.0562157	ns	less syn	0.00040217	-0.119775	FDR1%	0.344396	0.0486727	ns	less syn
310	Q5XI19;A0A0G2JWC7		Fermt2	0.187301	-0.0363283	ns	0.118592	0.0895125	ns	unchanged	0.077327	-0.0533385	ns	0.972764	-0.0233956	ns	unchanged
1173	Q66HI5;A0JPM7;Q6AYV6;Q2TA66;Q5FVS1;P19132;Q6P9V2;Q6LDW6	Ferritin;Ferritin heavy chain;Ferritin heavy chain, N-terminally processed	Fth1	0.00470995	0.161203	ns	0.706757	0.00669102	ns	unchanged	5.30681e-05	0.179301	FDR1%	0.0776337	0.187683	ns	more syn
1132	A0A140TAJ3;Q32PX7	Far upstream element-binding protein 1	Fubp1	0.972838	-0.0264509	ns	0.563927	0.0548265	ns	unchanged	0.240453	-0.0338326	ns	0.475538	-0.0832931	ns	unchanged
6669	Q6P775;Q8CFG2		Fibp	0.208758	-0.189662	ns	0.0581886	0.181825	ns	unchanged	0.774589	-0.0338763	ns	0.187792	0.0214671	ns	unchanged
6005	Q5U2V1;A0A096MJW1		Fkbp10	0.0213661	0.176467	ns	0.0138133	0.172014	ns	unchanged	0.104391	-0.122863	ns	0.464068	-0.0851375	ns	unchanged
2877	D4A4P4;B1WBY2		Flad1	0.0997703	-0.0569256	ns	0.611002	0.0130744	ns	unchanged	0.98526	0.0344995	ns	0.818498	0.0198251	ns	unchanged
955	A0A0G2KA27;O08873	MAP kinase-activating death domain protein	Madd	4.00823e-11	-0.276436	FDR1%	0.00359223	0.057184	ns	less syn	0.00012813	-0.169297	FDR1%	0.0177492	0.0747402	ns	less syn
3233	D4IGX4;Q6EV76	Alpha-(1,6)-fucosyltransferase	Fut8	0.0767128	-0.118755	ns	0.0103834	0.350746	ns	unchanged	0.0317328	0.0893866	ns	0.222595	-0.106202	ns	unchanged
2665	M0RAK4;D3ZYW7;A0A0A0MXX7	Frataxin, mitochondrial;Frataxin intermediate form;Frataxin mature form	Fxn	0.579513	-0.166959	ns	0.77538	0.0122157	ns	unchanged	0.004	-0.219563	ns	0.00193111	-0.0701963	ns	unchanged
5348	Q2PQA9	Kinesin-1 heavy chain	Kif5b	7.24293e-05	-0.142465	FDR1%	3.06336e-05	0.140444	FDR1%	slower turnover	0.300376	0.0302806	ns	0.0102908	0.122063	ns	unchanged
4985	P54921	Alpha-soluble NSF attachment protein	Napa	3.37318e-12	-0.2521	FDR1%	5.95974e-05	0.140487	FDR1%	slower turnover	0.495424	-0.0717163	ns	0.12909	0.0827277	ns	unchanged
1472	B2GV24;A0A0G2K266	E3 UFM1-protein ligase 1	Ufl1	0.163727	-0.0937528	ns	0.00131881	0.140842	FDR1%	less deg	0.00771895	-0.214099	ns	0.0489485	-0.126702	ns	unchanged
4156	G3V928;Q5I0H1		Lrp1	2.06129e-07	-0.0585869	FDR1%	6.54641e-10	0.140967	FDR1%	slower turnover	0.475135	0.0172098	ns	0.0438226	0.0317131	ns	unchanged
2104	D3ZG78		Zzef1	0.000419359	-0.275924	FDR1%	0.00358248	0.153239	ns	less syn	0.750648	0.0552758	ns	0.678329	0.03519	ns	unchanged
4171	G3V997;Q9ESI7	Neuronal migration protein doublecortin	Dcx	8.17761e-05	-0.275461	FDR1%	0.21586	0.0633255	ns	less syn	9.63123e-08	0.320029	FDR1%	0.000331764	0.12363	FDR1%	more syn & less deg
6488	Q6AY57	WD repeat domain phosphoinositide-interacting protein 2	Wipi2	0.278147	-0.0549491	ns	0.000504784	0.141006	FDR1%	less deg	0.664242	-0.0256779	ns	0.344016	0.0741599	ns	unchanged
2210	D3ZJK8		Atp8a1	0.598418	-0.171026	ns	0.00124218	0.141113	FDR1%	less deg	0.862496	0.0101859	ns	6.16634e-05	0.378897	FDR1%	less deg
5386	Q3B8Q0;M0R7M8;M0R8A4	Microtubule-associated protein RP/EB family member 2	Mapre2;LOC100911918	0.0715154	-0.307252	ns	0.00132693	0.14126	FDR1%	less deg	0.1978	-0.0905099	ns	0.000118809	0.193409	FDR1%	less deg
2478	D3ZTV3		Flrt2	0.160659	-0.104164	ns	0.0101117	0.250821	ns	unchanged	NA	NA	NA	NA	NA	NA	NA
1543	B2RYN1		Fn3krp	0.0337492	-0.283497	ns	0.0221854	0.141568	ns	unchanged	0.742827	-0.0238345	ns	0.0454333	0.0931141	ns	unchanged
4052	Q6P7A8;G3V7X5;P24054	SPARC-like protein 1	Sparcl1	0.190447	0.0813747	ns	0.0538947	0.191004	ns	unchanged	1.71241e-06	-0.348569	FDR1%	0.548997	-0.0587878	ns	less syn
816	D3ZCI0;A0A0G2KA23;A0A0G2K785;Q63060	Glycerol kinase	Gk	0.0430795	-0.0957813	ns	0.682706	-0.0173774	ns	unchanged	5.38437e-05	-0.348123	FDR1%	0.179565	-0.0438965	ns	less syn
4617	P09951	Synapsin-1	Syn1	0.0322961	-0.260369	ns	0.397469	-0.0546024	ns	unchanged	0.331561	-0.0596434	ns	0.00145074	0.200644	FDR1%	less deg
2043	D3ZEH2		Foxred1	0.553224	-0.0550119	ns	0.977925	0.0112319	ns	unchanged	0.302035	-0.0270897	ns	0.0488331	-0.0938095	ns	unchanged
3845	Q7TQ25;Q7TNM3;F7EYB9		Omg	0.98722	-0.00871198	ns	0.00058566	0.141446	FDR1%	less deg	0.00892529	-0.275075	ns	0.000380405	0.139063	FDR1%	less deg
5153	P70470	Acyl-protein thioesterase 1	Lypla1	0.0477757	-0.191487	ns	0.594913	0.0736266	ns	unchanged	2.04391e-05	-0.344342	FDR1%	0.010745	0.0852828	ns	less syn
512	A0A0G2K5D4;A0A0G2K0J9;Q5XPT5;P63079	Gamma-aminobutyric acid receptor subunit beta-3	Gabrb3	0.307807	-0.179686	ns	0.0377823	0.1548	ns	unchanged	0.485541	-0.087719	ns	0.346079	0.00179479	ns	unchanged
1799	C9E895;P18088;B3VQJ0;Q63211	Glutamate decarboxylase 1	Gad1	0.913648	-0.0334662	ns	0.0207382	0.132093	ns	unchanged	1.31065e-12	-0.23486	FDR1%	2.72787e-16	0.583667	FDR1%	slower turnover
5276	Q05683	Glutamate decarboxylase 2	Gad2	0.998462	-0.00151711	ns	0.832386	0.0180943	ns	unchanged	8.20539e-37	-0.782165	FDR1%	1.48783e-07	0.120357	FDR1%	slower turnover
3304	F1LMD9;P97874	Cyclin-G-associated kinase	Gak	0.00448753	-0.114609	ns	0.481037	0.0731625	ns	unchanged	0.161293	-0.0750882	ns	0.0568585	0.0577993	ns	unchanged
406	A0A0G2JYD8;G3V7U6;Q8R4C0	Calpain-5	Capn5	0.00967392	-0.153736	ns	0.371568	0.0241914	ns	unchanged	2.13894e-12	0.466789	FDR1%	1.48287e-05	0.167275	FDR1%	more syn & less deg
5229	P97846	Contactin-associated protein 1	Cntnap1	6.16588e-16	-0.323738	FDR1%	1.08791e-05	0.141462	FDR1%	slower turnover	4.849e-05	-0.13273	FDR1%	3.90438e-07	0.228545	FDR1%	slower turnover
5360	Q32KJ6;A0A0G2K4H6	N-acetylgalactosamine-6-sulfatase	Galns	0.572963	0.0482396	ns	0.518509	0.0702456	ns	unchanged	0.541965	-0.0781026	ns	0.00598451	0.139356	ns	unchanged
4010	G3V7I3;B5DEX7		Atp13a1	0.564204	-0.0653579	ns	1.0502e-05	0.141704	FDR1%	less deg	0.410486	-0.0181793	ns	0.973116	-0.00890319	ns	unchanged
3414	F1LQN1;Q5BJS5	Polypeptide N-acetylgalactosaminyltransferase	Galnt16	NA	NA	NA	NA	NA	NA	NA	0.302854	-0.0387924	ns	0.295672	0.0898547	ns	unchanged
618	A0A0G2K2R0;D3ZU85		Frmd4a	NA	NA	NA	NA	NA	NA	NA	0.328124	0.0558605	ns	0.00759786	0.250637	ns	unchanged
1792	C0IXW5;C0IXW6;E9PTY6;A0A096MIW7		Fry	0.964648	0.0359442	ns	0.103804	0.241238	ns	unchanged	0.0228693	-0.21256	ns	0.688136	0.0119657	ns	unchanged
5744	Q5EGY4	Synaptobrevin homolog YKT6	Ykt6	0.942969	-0.0690914	ns	0.288572	0.0403419	ns	unchanged	0.0256293	0.208211	ns	3.88591e-09	0.200088	FDR1%	less deg
5089	P62909	40S ribosomal protein S3	Rps3	0.405772	-0.044745	ns	5.8737e-06	0.142355	FDR1%	less deg	0.0491628	-0.104162	ns	0.000184147	-0.136503	FDR1%	more deg
1159	A0A1W2Q680;Q6AYA1	H/ACA ribonucleoprotein complex subunit 1	Gar1	NA	NA	NA	NA	NA	NA	NA	0.29802	0.0216778	ns	0.479584	0.0281702	ns	unchanged
1382	B1H2A2		Fsd1	0.0133937	-0.200177	ns	0.0354038	0.0992349	ns	unchanged	0.791169	-0.0957758	ns	0.00700198	0.13145	ns	unchanged
4065	Q2QC85;G3V829;A0A1W2Q698		Fubp3	0.237316	0.00363522	ns	0.49149	0.0200411	ns	unchanged	0.383187	-0.0865465	ns	0.150004	-0.0961028	ns	unchanged
734	A0A0G2K5C8;P84903;A0A1B0GWQ1;B2RYV1;A0A1B0GWK9	Stromal interaction molecule 1	Stim1	1.85409e-06	-0.260197	FDR1%	0.000291561	0.142394	FDR1%	slower turnover	0.00861416	0.145411	ns	0.026442	0.0705125	ns	unchanged
1104	A0A140TA89;P50442	Glycine amidinotransferase, mitochondrial	Gatm	0.0632916	-0.0898603	ns	0.563582	-0.0212752	ns	unchanged	0.0649644	-0.0664375	ns	0.0039501	-0.150744	ns	unchanged
1919	D3ZAQ0		Fundc2	0.0969	-0.209918	ns	0.263712	0.112669	ns	unchanged	NA	NA	NA	NA	NA	NA	NA
2954	D4A6U0;Q5M868;Q5M868-2	Non-lysosomal glucosylceramidase	Gba2	0.530132	-0.10913	ns	0.368611	0.0182133	ns	unchanged	0.0227098	-0.160797	ns	0.048021	0.154186	ns	unchanged
6061	Q5XI32;A0A0G2JYB1	F-actin-capping protein subunit beta	Capzb	1.17145e-09	-0.275345	FDR1%	0.501673	0.0170725	ns	less syn	0.0195598	-0.121901	ns	0.0678536	0.0666737	ns	unchanged
5983	Q5U2N3	Membrane-associated phosphatidylinositol transfer protein 1	Pitpnm1	7.0971e-06	-0.275303	FDR1%	0.0249734	0.109658	ns	less syn	0.476336	-0.0229345	ns	0.4143	0.104047	ns	unchanged
2661	D3ZYS7		G3bp1	0.475416	-0.0159268	ns	0.85998	0.00746561	ns	unchanged	0.000299386	-0.103796	FDR1%	0.121182	-0.107956	ns	less syn
3909	G3V6F4;P56558	UDP-N-acetylglucosamine--peptide N-acetylglucosaminyltransferase 110 kDa subunit	Ogt	0.000110441	-0.274959	FDR1%	0.467198	0.0884007	ns	less syn	2.04214e-06	0.349991	FDR1%	0.0927869	0.128168	ns	more syn
4434	O35509;A0A0G2JZR4	Ras-related protein Rab-11B	Rab11b	0.000198658	-0.111754	FDR1%	2.46599e-05	0.142975	FDR1%	slower turnover	0.000870348	-0.125368	FDR1%	0.0098907	-0.0840736	ns	less syn
447	D3ZAL7;A0A0G2JZD5;C6JUQ2		Gab1	0.210935	-0.0797733	ns	0.0453697	-0.0991982	ns	unchanged	0.0550854	0.193763	ns	0.409305	-0.0610073	ns	unchanged
4744	P19468	Glutamate--cysteine ligase catalytic subunit	Gclc	0.0873536	0.0537838	ns	0.36364	-0.0125522	ns	unchanged	0.894862	-0.00768442	ns	0.0611285	0.103048	ns	unchanged
3099	D4AB03		Fam120a	2.71733e-05	-0.157345	FDR1%	6.93036e-06	0.143364	FDR1%	slower turnover	6.38138e-07	-0.186161	FDR1%	0.00410247	-0.179138	ns	less syn
5819	Q5I0P2;Q9QYU8;A0A0G2JZ02;A0A0G2JYW6	Glycine cleavage system H protein, mitochondrial	Gcsh	0.823774	-0.014919	ns	0.906339	0.0202941	ns	unchanged	0.36694	-0.0876493	ns	0.000286718	-0.083749	FDR1%	more deg
4409	O35049;D4A8L3	Sphingomyelin phosphodiesterase 3	Smpd3	0.000687198	-0.274125	FDR1%	0.103376	0.0675164	ns	less syn	0.00471198	-0.177527	ns	0.050771	-0.0625048	ns	unchanged
4188	G3V9M3;Q5BJR0		Wdr47	1.93197e-12	-0.274085	FDR1%	0.0723014	0.0602733	ns	less syn	3.56135e-05	0.142783	FDR1%	5.97097e-09	0.161639	FDR1%	more syn & less deg
6216	Q6AZ05;Q63054;A0A0H2UHX6;Q6RUG5	Islet cell autoantigen 1;Islet cell autoantigen 1-like protein	Ica1;Ica1l	0.0914869	-0.197534	ns	2.33211e-05	0.143582	FDR1%	less deg	0.00517564	-0.279733	ns	0.653428	0.0039055	ns	unchanged
6365	Q66H63	Ganglioside-induced differentiation-associated-protein 2	Gdap2	0.323796	-0.151492	ns	0.355922	0.0556856	ns	unchanged	0.30217	-0.177748	ns	0.498366	-0.0341959	ns	unchanged
7063	Q9JL55;M0R5Q9	Glycerophosphodiester phosphodiesterase 1	Gde1	0.262526	-0.10305	ns	0.110625	0.157755	ns	unchanged	0.250535	-0.118021	ns	0.532512	0.0318592	ns	unchanged
5044	P61983	14-3-3 protein gamma;14-3-3 protein gamma, N-terminally processed	Ywhag	6.95785e-05	-0.273939	FDR1%	0.284803	0.0927473	ns	less syn	0.447401	0.0361023	ns	0.0292119	-0.0381591	ns	unchanged
7136	Q9WV48-3;Q9WV48;Q9WV48-4;Q9WV48-5	SH3 and multiple ankyrin repeat domains protein 1	Shank1	0.00673466	-0.236396	ns	0.0163372	-0.0823333	ns	unchanged	0.321779	0.0414576	ns	6.628e-06	0.196146	FDR1%	less deg
2712	D4A022		Gapvd1	0.156782	-0.153907	ns	0.0185293	0.113207	ns	unchanged	0.106574	0.14672	ns	0.01543	0.130898	ns	unchanged
5269	Q04462;Q4FZR0;A0A0G2JVG2	Valine--tRNA ligase	Vars	0.850483	0.00393228	ns	6.11511e-06	0.143709	FDR1%	less deg	0.00457891	-0.113025	ns	0.749184	0.028741	ns	unchanged
4915	P47819	Glial fibrillary acidic protein	Gfap	0.214794	0.319946	ns	0.337328	0.151881	ns	unchanged	0.470541	-0.347904	ns	0.264886	0.0997095	ns	unchanged
5291	Q07803	Elongation factor G, mitochondrial	Gfm1	0.710609	-0.0464874	ns	0.0359761	0.126875	ns	unchanged	0.055842	-0.22453	ns	0.0462043	-0.0516034	ns	unchanged
3322	F1LMZ4;Q5BJP6	Ribosome-releasing factor 2, mitochondrial	Gfm2	0.00843132	-0.184993	ns	0.406072	0.0179281	ns	unchanged	0.242174	-0.0443339	ns	0.983655	-0.00142221	ns	unchanged
6813	Q7TPB1	T-complex protein 1 subunit delta	Cct4	0.00234108	-0.116201	FDR1%	8.16821e-14	0.144065	FDR1%	slower turnover	0.803652	0.00155473	ns	0.0032326	0.0636359	ns	unchanged
2563	D3ZW15		Sec24b	0.0150614	-0.116753	ns	3.59714e-06	0.144077	FDR1%	less deg	0.277193	0.0897533	ns	0.0358479	0.0456078	ns	unchanged
5937	Q5RK08		Gbas	0.00787311	-0.140875	ns	0.724519	0.0164298	ns	unchanged	0.242029	-0.102258	ns	0.141224	0.00861849	ns	unchanged
40	A0A096MJY6		Gbe1	0.895164	-0.0098416	ns	0.0752814	0.162808	ns	unchanged	0.299745	-0.137295	ns	0.0523937	0.299859	ns	unchanged
5410	Q3MHS9;Q5BJY2		Cct6a	3.09973e-05	-0.118437	FDR1%	7.43641e-10	0.144298	FDR1%	slower turnover	0.826851	0.0102518	ns	0.0998678	0.0126663	ns	unchanged
3134	D4AC36		Eif3f	0.445604	-0.0392486	ns	0.00036172	0.144392	FDR1%	less deg	0.00270871	-0.135084	ns	0.167061	-0.141638	ns	unchanged
6091	Q5XIA8	Growth hormone-inducible transmembrane protein	Ghitm	0.275409	-0.0790331	ns	0.0601667	0.199151	ns	unchanged	0.276945	-0.0354023	ns	0.797988	-0.0722828	ns	unchanged
1647	B4F773;P0C5X8	Protein tweety homolog;Protein tweety homolog 1	Ttyh1	0.0375804	-0.154044	ns	0.596285	-0.000407162	ns	unchanged	0.0011084	-0.34383	FDR1%	0.92513	-0.0559757	ns	less syn
7172	Q9Z254	PDZ domain-containing protein GIPC1	Gipc1	0.0407399	-0.105798	ns	0.937345	0.0236079	ns	unchanged	0.0860199	-0.0682617	ns	0.67626	0.104273	ns	unchanged
617	Q562C3;A0A0G2K2Q2		Gcat	0.0871481	0.102957	ns	0.12464	-0.0184626	ns	unchanged	0.723763	-0.029484	ns	0.00841619	-0.134261	ns	unchanged
4596	P08050;Q6Q6S2	Gap junction alpha-1 protein	Gja1	0.54607	-0.00270204	ns	0.808675	0.149141	ns	unchanged	0.0263082	-0.208849	ns	0.00259521	-0.26856	ns	unchanged
2457	D3ZT90		Gcdh	0.114289	-0.048153	ns	0.0530283	0.0140593	ns	unchanged	0.0219493	-0.104249	ns	0.0458278	-0.0156103	ns	unchanged
1743	B5DFA2;P0C0R5	Phosphoinositide 3-kinase regulatory subunit 4	Pik3r4	0.000239393	-0.189997	FDR1%	7.45054e-07	0.144409	FDR1%	slower turnover	0.294937	0.0866403	ns	0.00175277	0.116026	ns	unchanged
2513	D3ZUM4	Beta-galactosidase	Glb1	0.27649	0.0595261	ns	0.697003	0.016477	ns	unchanged	0.0591789	-0.0703215	ns	0.0215451	0.122075	ns	unchanged
244	A0A0G2JUZ5	Glycine cleavage system P protein	Gldc	0.274617	0.217009	ns	0.615345	0.0147269	ns	unchanged	0.0654427	-0.196407	ns	0.00716318	-0.112584	ns	unchanged
5522	Q4KLN4	Nucleoporin GLE1	Gle1	NA	NA	NA	NA	NA	NA	NA	0.412235	0.0968432	ns	0.970065	0.0432543	ns	unchanged
5376	Q3B7D1	Ubiquitin-conjugating enzyme E2 Z	Ube2z	0.709421	-0.0726976	ns	0.000740907	0.145273	FDR1%	less deg	0.375439	0.00235332	ns	0.0493213	0.124776	ns	unchanged
5405	Q3KRF2;Q9Z1A6;Q6P513	Vigilin	Hdlbp	5.51115e-12	-0.153481	FDR1%	4.91339e-07	0.145473	FDR1%	slower turnover	2.71329e-28	-0.278593	FDR1%	0.436671	-0.13438	ns	less syn
5403	Q3KRE8	Tubulin beta-2B chain	Tubb2b	0.0292517	-0.288328	ns	0.270582	0.0212676	ns	unchanged	0.281486	0.0476563	ns	1.08965e-06	0.195462	FDR1%	less deg
6724	Q6T487;Q6GMN8		Actn1	0.00145323	-0.273226	FDR1%	0.00838594	-0.135673	ns	less syn	1.19978e-06	-0.382681	FDR1%	0.00160752	-0.106972	ns	less syn
2971	D4A771;D3ZZN4;P04646;A0A096P6M4;F1M0T2	60S ribosomal protein L35a	LOC100362049;LOC100362338;Rpl35a	0.763758	-0.027276	ns	2.55833e-06	0.145697	FDR1%	less deg	0.362432	-0.0768015	ns	0.137014	-0.0752213	ns	unchanged
1739	B5DF89;A0A0G2JSP3	Cullin-3	Cul3	0.000569901	-0.149539	FDR1%	0.0017291	0.146018	FDR1%	slower turnover	0.031336	-0.0786543	ns	0.00420994	0.151812	ns	unchanged
1648	B4F774		Gdap1l1	0.00720098	-0.212659	ns	0.220893	0.00858771	ns	unchanged	0.715959	0.00236447	ns	0.00890777	0.0569867	ns	unchanged
4873	P35745;D4A1G1	Acylphosphatase-2;Acylphosphatase	Acyp2	0.000900111	-0.350344	FDR1%	0.0003124	0.146508	FDR1%	slower turnover	0.00230875	-0.291425	ns	0.0768037	0.0363923	ns	unchanged
689	A0A0G2K490;D3ZZQ0		Tnik	1.74148e-09	-0.271799	FDR1%	0.913639	-0.0282029	ns	less syn	0.1112	-0.078685	ns	0.0406618	0.0799979	ns	unchanged
4648	P10860;Q7TPI5	Glutamate dehydrogenase 1, mitochondrial	Glud1	0.0142717	-0.0943136	ns	0.155092	-0.0216484	ns	unchanged	0.0118704	-0.124005	ns	4.39489e-05	-0.0730935	FDR1%	more deg
3573	F1LXF5		Get4	0.0855426	-0.170074	ns	0.233791	0.176708	ns	unchanged	0.304885	0.0299851	ns	0.251837	0.0609854	ns	unchanged
4652	P11232;R4GNK3	Thioredoxin	Txn;Txn1	0.00864033	-0.215107	ns	0.0289323	0.0414556	ns	unchanged	0.425706	0.0186729	ns	3.01731e-06	0.194248	FDR1%	less deg
3703	F1M6T6;A0A0G2JV49		Ppp6r2	0.00205291	-0.271498	FDR1%	0.2882	0.0454334	ns	less syn	0.180718	-0.170033	ns	0.456081	0.0345115	ns	unchanged
164	A0A0G2JTA7;D4AAY3		Rasal2	0.513902	-0.0064997	ns	0.000258323	0.146772	FDR1%	less deg	1.10867e-07	-0.827891	FDR1%	0.0289748	-0.124377	ns	less syn
1667	B4F7E2;P50430;A0JPJ3	Arylsulfatase B	Arsb	0.686185	0.0814651	ns	0.00384891	0.1044	ns	unchanged	0.61269	0.100131	ns	4.11592e-05	0.19406	FDR1%	less deg
2394	D3ZR63		Gfod1	0.748649	-0.257063	ns	0.00287657	0.215292	ns	unchanged	0.848732	-0.164276	ns	0.000984006	0.128798	FDR1%	less deg
5746	Q5FVF3		Gga1	NA	NA	NA	NA	NA	NA	NA	0.307515	-0.100969	ns	0.150667	0.0994869	ns	unchanged
6620	Q6MG11;A0A0G2K9K5	Alpha-tubulin N-acetyltransferase 1	Atat1	0.00823128	-0.160931	ns	0.0729601	0.0662646	ns	unchanged	0.428592	0.0438732	ns	7.32781e-07	0.19387	FDR1%	less deg
245	A0A0G2JV04;D3ZHG8		Gga3	0.0265719	-0.375974	ns	0.902454	-0.00388913	ns	unchanged	0.253739	-0.13183	ns	0.329032	0.101505	ns	unchanged
2355	D3ZPV8		Ggct	NA	NA	NA	NA	NA	NA	NA	0.2833	-0.170245	ns	0.110763	0.139949	ns	unchanged
23	A0A096MJI4		Gigyf2	0.015407	-0.217916	ns	0.904468	0.0148087	ns	unchanged	0.00159125	-0.155278	FDR1%	0.274656	-0.126259	ns	less syn
6712	Q6Q7Y5	Guanine nucleotide-binding protein subunit alpha-13	Gna13	0.243132	-0.048948	ns	0.379325	0.0244143	ns	unchanged	0.833751	-0.0894097	ns	0.109815	0.0613987	ns	unchanged
4647	P10824	Guanine nucleotide-binding protein G(i) subunit alpha-1	Gnai1	0.00691816	-0.321293	ns	0.587899	0.00812155	ns	unchanged	0.00716729	-0.253705	ns	0.296694	0.0117652	ns	unchanged
4556	Q45QN0;P04897;Q5EEY4;Q5EEY3	Guanine nucleotide-binding protein G(i) subunit alpha-2	Gnai2	0.262988	0.00176796	ns	0.0810036	0.0751499	ns	unchanged	0.861696	0.0251736	ns	0.0770807	0.0559082	ns	unchanged
4606	Q45QM8;P08753	Guanine nucleotide-binding protein G(k) subunit alpha	Gnai3	0.270753	-0.00515161	ns	0.109798	0.0589094	ns	unchanged	0.000450092	0.139135	FDR1%	0.371923	-0.0610872	ns	more syn
5006	P59215;Q8R4R4;Q8R4R5	Guanine nucleotide-binding protein G(o) subunit alpha	Gnao1	0.156292	-0.102583	ns	0.337753	0.0339378	ns	unchanged	0.733241	-0.0420548	ns	0.00216588	0.162245	ns	unchanged
6478	Q6AY24		Ubl7	0.0161118	-0.140088	ns	0.000818736	0.147981	FDR1%	less deg	0.250372	0.186468	ns	0.105001	0.0937023	ns	unchanged
6655	Q6P6Q9;F1LNV5;A0A0G2K0T5	Calcium uptake protein 1, mitochondrial	Micu1	0.000223843	-0.271283	FDR1%	0.0172518	0.0937705	ns	less syn	0.0764564	-0.140638	ns	0.0620283	-0.0361672	ns	unchanged
3804	F1MAF8;Q5EBA2		Atg2b	8.82705e-05	-0.271279	FDR1%	0.0351853	0.187665	ns	less syn	0.511414	0.00203279	ns	0.071834	0.0965989	ns	unchanged
3223	D4AEI5;A0A0G2K402		Myef2	0.000214095	-0.150696	FDR1%	0.000279876	0.1481	FDR1%	slower turnover	0.587202	-0.072746	ns	0.17902	-0.0512264	ns	unchanged
3521	F1LUE2;G3V9G3;P08413;Q9Z2F1	Calcium/calmodulin-dependent protein kinase type II subunit beta	Camk2g;Camk2b	0.0032639	-0.360344	ns	0.302607	0.0204975	ns	unchanged	0.287707	0.0844513	ns	4.79175e-06	0.192503	FDR1%	less deg
470	A0A0G2JZS5;Q7TS62;P53563-3;P53563;Q9WUI5;Q548R7;E9PU78;P53563-2;Q5K547	Bcl-2-like protein 1	Bcl2l1;Bcl2l1-ps1;bcl-X	0.000979751	-0.270679	FDR1%	0.113309	0.132133	ns	less syn	NA	NA	NA	NA	NA	NA	NA
1205	A2RRU1	Glycogen [starch] synthase, muscle	Gys1	0.149489	-0.091904	ns	0.054544	0.0510273	ns	unchanged	1.34086e-06	-0.333252	FDR1%	0.654408	-0.0643596	ns	less syn
4411	O35077	Glycerol-3-phosphate dehydrogenase [NAD(+)], cytoplasmic	Gpd1	0.175353	-0.33617	ns	0.0775522	0.16138	ns	unchanged	0.00125496	0.434532	FDR1%	9.74028e-07	0.334628	FDR1%	more syn & less deg
3940	G3V6P8;Q45QK0;O35359	Guanine nucleotide-binding protein subunit gamma	Gng12	0.719656	0.0750843	ns	0.738108	0.0136782	ns	unchanged	0.547386	-0.0998518	ns	0.861175	-0.0147784	ns	unchanged
3690	F1M5V2		Glipr2	0.299404	0.0344843	ns	0.838685	0.06484	ns	unchanged	0.6709	-0.0505897	ns	0.341577	0.0249949	ns	unchanged
4106	G3V8K2;O35356	Guanine nucleotide-binding protein subunit gamma	Gng3	0.102628	-0.117601	ns	0.423645	-0.00518062	ns	unchanged	0.0487396	0.303857	ns	0.168558	0.1619	ns	unchanged
4386	O08618;Q6AZ40	Phosphoribosyl pyrophosphate synthase-associated protein 2	Prpsap2	0.259857	-0.129719	ns	2.50322e-06	0.148201	FDR1%	less deg	0.431209	0.0286355	ns	1.08225e-06	0.111793	FDR1%	less deg
136	A0A0G2JSR6;P43425	Guanine nucleotide-binding protein G(I)/G(S)/G(O) subunit gamma-7	Gng7	0.0181924	-0.32583	ns	0.49759	0.00384998	ns	unchanged	0.000174746	-0.318584	FDR1%	0.00071562	0.180774	FDR1%	slower turnover
97	A0A0F7RQJ6;P80254;A0A1W2Q637	D-dopachrome decarboxylase	Ddt	0.0274355	-0.148621	ns	0.0233498	0.039114	ns	unchanged	0.0368042	0.117404	ns	2.14206e-09	0.191833	FDR1%	less deg
6848	Q811S9	Guanine nucleotide-binding protein-like 3	Gnl3	NA	NA	NA	NA	NA	NA	NA	0.837852	0.0946719	ns	0.986336	-0.022453	ns	unchanged
457	A0A0G2JZI2;Q6TXE9;Q5I0H2		Eprs	0.510452	0.0261412	ns	2.5228e-15	0.148276	FDR1%	less deg	0.00145833	-0.0653416	FDR1%	0.107927	-0.0706744	ns	less syn
1749	B5DFC6;M0RCH5	Glucosamine-6-phosphate isomerase	Gnpda1	0.310325	-0.209034	ns	0.480523	0.0292196	ns	unchanged	0.248825	-0.139311	ns	0.00338539	0.0698018	ns	unchanged
1710	B5DEZ6	Glucosamine-6-phosphate isomerase	Gnpda2	0.433593	-0.177782	ns	0.919236	0.0185794	ns	unchanged	0.914819	0.0180808	ns	0.646895	0.00200594	ns	unchanged
3592	F1LYQ8	FERM, RhoGEF and pleckstrin domain-containing protein 1	Farp1	0.221753	-0.0473124	ns	5.06828e-05	0.148823	FDR1%	less deg	0.311277	-0.103517	ns	0.000109186	0.132299	FDR1%	less deg
1435	B1WC73		Arl6	0.00279013	-0.270368	FDR1%	0.00551686	0.183435	ns	less syn	0.353449	0.0140685	ns	0.0025589	0.151164	ns	unchanged
3181	D4ADD7		Glrx5	0.0125437	-0.149257	ns	0.357552	0.0247842	ns	unchanged	0.875215	-0.196205	ns	0.00154915	-0.195142	FDR1%	more deg
6679	Q6P7R8;D3ZPU3	Very-long-chain 3-oxoacyl-CoA reductase	Hsd17b12	0.569076	-0.0709698	ns	0.00059438	0.149075	FDR1%	less deg	1.00584e-10	-0.578626	FDR1%	0.285833	-0.089257	ns	less syn
6545	Q6AYQ1	Golgin subfamily A member 7	Golga7	0.524442	-0.118844	ns	0.0472966	0.206743	ns	unchanged	0.0171419	-0.110053	ns	0.355454	-0.00768313	ns	unchanged
4180	G3V9H0;P50904	Ras GTPase-activating protein 1	Rasa1	0.309963	-0.0149998	ns	0.49862	0.0798937	ns	unchanged	0.000105999	-0.328451	FDR1%	0.386775	0.104548	ns	less syn
6441	Q68G33;F6T071;Q9R064	Golgi reassembly-stacking protein 2	Gorasp2	0.265231	-0.0575485	ns	0.266607	0.0435608	ns	unchanged	0.522108	-0.0351887	ns	0.906985	-0.0105257	ns	unchanged
4561	P05370	Glucose-6-phosphate 1-dehydrogenase	G6pdx	0.207297	-0.0969381	ns	7.3792e-09	0.149563	FDR1%	less deg	0.450797	-0.0547186	ns	2.12417e-06	0.121545	FDR1%	less deg
433	A0A0G2JZ60	Submitted name: Fibronectin type III and SPRY domain-containing 1-like	Fsd1l	0.000152654	-0.270091	FDR1%	0.00675248	0.138806	ns	less syn	0.450746	0.195464	ns	0.000245939	0.188633	FDR1%	less deg
379	A0A0G2JXY6;Q9QXU3;Q00954	Sodium channel subunit beta-1	Scn1b	0.00104313	-0.269559	FDR1%	0.463126	0.154569	ns	less syn	NA	NA	NA	NA	NA	NA	NA
2967	D4A746		Gmppb	0.0227964	-0.300305	ns	0.045927	0.128417	ns	unchanged	0.0759712	-0.222235	ns	0.0839025	0.150589	ns	unchanged
2659	D3ZYR4;A0A096MJH1		Sema4d	1.04537e-06	-0.269456	FDR1%	0.046402	-0.102263	ns	less syn	0.208356	-0.130273	ns	0.00234644	0.141982	ns	unchanged
340	A0A0G2JX25;Q5FVP6		Gmpr2	0.49135	-0.0778964	ns	0.0124641	0.0932281	ns	unchanged	0.0373847	-0.24143	ns	0.089698	0.056081	ns	unchanged
905	A0A0G2K9B2;Q80VJ4	Glycerophosphocholine phosphodiesterase GPCPD1	Gpcpd1	NA	NA	NA	NA	NA	NA	NA	4.83321e-05	0.46403	FDR1%	0.142903	0.106635	ns	more syn
6023	Q5U318	Astrocytic phosphoprotein PEA-15	Pea15	0.149766	-0.153041	ns	0.0513728	0.0817459	ns	unchanged	1.7333e-05	0.429858	FDR1%	0.000686571	0.389713	FDR1%	more syn & less deg
5990	Q5U2Q7	Eukaryotic peptide chain release factor subunit 1	Etf1	0.116893	-0.0873884	ns	0.00174516	0.149568	FDR1%	less deg	0.401278	-0.0720798	ns	0.567546	0.0249655	ns	unchanged
731	A0A0G2K5A4;D3ZLD5		Golga3	0.539061	-0.0345645	ns	0.00378029	0.138116	ns	unchanged	0.0569155	-0.0652673	ns	0.54483	-0.0378937	ns	unchanged
6540	Q6AYM8		Gpaa1	0.0445355	-0.12364	ns	0.365764	-0.0225741	ns	unchanged	0.94318	-0.0883621	ns	0.770445	-0.151539	ns	unchanged
502	D3ZMI4;A0A0G2K0F3;Q9WTP0-2;D4A9L5;Q9WTP0;A0A0G2K0B2;D4ACZ4	Band 4.1-like protein 1	Epb41l1	9.82463e-13	-0.268851	FDR1%	0.562956	-0.0231018	ns	less syn	0.000201114	-0.119601	FDR1%	0.0439984	-0.0143295	ns	less syn
3369	F1LPC6;Q9JHW1;A0A0G2JY30;Q9JHW1-2	Carboxypeptidase D	Cpd	8.06811e-09	-0.268551	FDR1%	0.00732451	0.229992	ns	less syn	0.877317	0.00191683	ns	0.353496	-0.0924492	ns	unchanged
39	A0A096MJY1		Gpc6	0.696004	-0.01559	ns	0.238189	0.109284	ns	unchanged	0.00537239	-0.433535	ns	0.128904	0.0190023	ns	unchanged
149	A0A0G2JT06;A0A0G2JW80;P97834	COP9 signalosome complex subunit 1	Gps1	0.155612	-0.105904	ns	0.11531	0.0595176	ns	unchanged	0.0581929	-0.0726088	ns	0.0044856	0.114732	ns	unchanged
6200	Q62888;F1LQ41;A0A0U1RRX0;Q62888-2	Neuroligin-2	Nlgn2	0.000272788	-0.268544	FDR1%	0.101802	0.0848954	ns	less syn	0.000857981	-0.301835	FDR1%	0.612535	-0.00788286	ns	less syn
257	A0A0G2JV84	Submitted name: Glutamic--pyruvic transaminase 2	Gpt2	0.155865	0.000761313	ns	0.311946	0.0849021	ns	unchanged	0.00231487	-0.105499	ns	0.253452	-0.0819096	ns	unchanged
4338	M0RAM5;P04041;Q6PDW8	Glutathione peroxidase 1;Glutathione peroxidase	Gpx1	0.0105198	0.206828	ns	0.698506	0.0648924	ns	unchanged	4.84544e-05	0.217447	FDR1%	0.043847	0.137735	ns	more syn
647	A0A0G2K398;F8WFK6;P36970-2;P36970;Q91XR8;Q76LU9;A0A0G2KAD1	Glutathione peroxidase;Phospholipid hydroperoxide glutathione peroxidase, mitochondrial;Phospholipid hydroperoxide glutathione peroxidase, nuclear	Gpx4	0.0390899	-0.126246	ns	0.301828	0.0714844	ns	unchanged	0.00303814	-0.206922	ns	0.0595679	0.0713964	ns	unchanged
2389	D3ZQY4		Fryl	0.527523	-0.0203609	ns	0.00171957	0.149625	FDR1%	less deg	0.0720964	-0.078747	ns	0.71593	-0.0772211	ns	unchanged
6827	Q7TT49;A0A0G2KB58	Serine/threonine-protein kinase MRCK beta	Cdc42bpb	0.000766768	-0.268122	FDR1%	0.00301837	0.0823529	ns	less syn	0.806854	-0.00340938	ns	0.00546114	0.109862	ns	unchanged
412	D3ZEA3;A0A0G2JYJ1;P0CE43	Growth factor receptor-bound protein 10	Grb10	0.0605657	-0.220189	ns	0.00755826	0.143077	ns	unchanged	0.18646	-0.0561721	ns	0.551252	0.0309209	ns	unchanged
5282	Q06486;Q06486-2	Casein kinase I isoform delta	Csnk1d	3.50643e-09	-0.267143	FDR1%	0.423789	-0.0900648	ns	less syn	2.30552e-06	0.209403	FDR1%	0.0465009	0.166086	ns	more syn
2067	D3ZF21		Gprin3	0.0032905	-0.193298	ns	0.190889	-0.0565789	ns	unchanged	0.932788	-0.0182056	ns	0.126163	-0.0780435	ns	unchanged
1208	A2RRU4	Sterol regulatory element-binding protein cleavage-activating protein	Scap	0.00329606	-0.165392	ns	0.0101972	0.209086	ns	unchanged	3.73233e-05	-0.324639	FDR1%	0.0413279	-0.116385	ns	less syn
3908	G3V6D9;Q920G2	Na(+)/H(+) exchange regulatory cofactor NHE-RF;Na(+)/H(+) exchange regulatory cofactor NHE-RF2	Slc9a3r2	0.000243664	-0.267068	FDR1%	0.801402	-0.0129392	ns	less syn	0.00756072	-0.0981664	ns	0.275015	-0.0228872	ns	unchanged
6164	Q62640;F1LUR6	Glutamate receptor ionotropic, delta-1	Grid1	0.0236163	-0.165284	ns	0.698163	0.112889	ns	unchanged	0.347675	-0.108379	ns	0.446992	0.0380443	ns	unchanged
2330	D3ZP15		Rab9b	4.87434e-07	-0.266223	FDR1%	0.00234421	0.159555	ns	less syn	1.3221e-07	0.160515	FDR1%	0.499918	0.0293998	ns	more syn
6930	Q920A6	Retinoid-inducible serine carboxypeptidase	Scpep1	0.691338	0.109391	ns	8.82249e-05	0.149997	FDR1%	less deg	0.816131	0.0324892	ns	1.18294e-09	0.271386	FDR1%	less deg
2650	D3ZYJ5		Gramd1b	0.00795417	-0.186641	ns	0.0373817	0.0722782	ns	unchanged	7.17331e-08	-0.387462	FDR1%	0.00279516	-0.17935	ns	less syn
3133	D4AC23		Cct7	1.31617e-07	-0.127963	FDR1%	1.86995e-16	0.150666	FDR1%	slower turnover	0.476075	-0.00361686	ns	0.0454821	0.0392908	ns	unchanged
4837	P31422;A0A0G2JV93	Metabotropic glutamate receptor 3	Grm3	0.139937	-0.301931	ns	0.00297865	-0.235098	ns	unchanged	0.820555	-0.0618258	ns	0.153953	-0.111877	ns	unchanged
2314	D3ZN95		Hcfc1	0.00241213	-0.124829	FDR1%	6.07135e-05	0.150689	FDR1%	slower turnover	0.217291	0.00873694	ns	0.0868299	0.0502571	ns	unchanged
4862	P35400;F1LZS5;D3ZMI1	Metabotropic glutamate receptor 7	Grm7	0.0198647	-0.286959	ns	0.034928	-0.0355436	ns	unchanged	0.713245	-0.0929303	ns	0.916868	0.0118918	ns	unchanged
4139	G3V8V1;P23785;Q6IN42;F1LMP7	Granulins;Acrogranin;Granulin-1;Granulin-2;Granulin-3;Granulin-4;Granulin-5;Granulin-6;Granulin-7	Grn	0.214359	0.0622639	ns	0.461888	0.0144314	ns	unchanged	0.161713	0.12348	ns	0.0119018	0.150317	ns	unchanged
4876	P36506	Dual specificity mitogen-activated protein kinase kinase 2	Map2k2	0.00151445	-0.264976	FDR1%	0.0056771	0.128824	ns	less syn	0.374218	0.0295699	ns	0.00280632	0.210802	ns	unchanged
4868	P35465	Serine/threonine-protein kinase PAK 1	Pak1	0.00145533	-0.264823	FDR1%	0.452197	0.0588849	ns	less syn	0.051434	0.295787	ns	0.00346625	0.220371	ns	unchanged
6149	Q5XIT1	Microtubule-associated protein RP/EB family member 3	Mapre3	5.76797e-05	-0.264517	FDR1%	0.368106	0.0313619	ns	less syn	0.0061862	0.149854	ns	1.05915e-07	0.144434	FDR1%	less deg
6518	Q6AYD5;Q812C3		Gspt1	0.28265	-0.0928084	ns	0.0519886	0.154297	ns	unchanged	0.682953	0.11806	ns	0.16956	0.106659	ns	unchanged
3441	F1LRE1;A0A0G2JU71;P70619	Glutathione reductase	Gsr	0.0212247	-0.175246	ns	0.32839	0.0366192	ns	unchanged	0.463672	0.0287339	ns	0.0113975	0.0939789	ns	unchanged
4907	P46413	Glutathione synthetase	Gss	0.265084	-0.0393151	ns	0.0249737	0.0450954	ns	unchanged	0.0472084	-0.306453	ns	0.134632	0.0811071	ns	unchanged
1782	B6DYP8;Q9JLX3;P04904;A0A0G2JVT2;A0A0G2K8Q5;A0A0G2JTB1;P46418;F7F2H5;Q4FZZ3;B6DYP7;P04903;P00502;Q498T5;Q63232	Glutathione S-transferase;Glutathione S-transferase alpha-3;Glutathione S-transferase alpha-5;Glutathione S-transferase alpha-2;Glutathione S-transferase alpha-1;Glutathione S-transferase alpha-1, N-terminally processed	Gsta1;Gsta3;Gsta5;Gsta2	0.158648	-0.0738115	ns	0.0519581	-0.0901059	ns	unchanged	0.82315	0.0218154	ns	0.885871	-0.0137052	ns	unchanged
1244	A9UMW1;P14942;Q6TUG1	Glutathione S-transferase;Glutathione S-transferase alpha-4	Gsta4;LOC688925	0.499925	-0.0353354	ns	0.981684	0.00828622	ns	unchanged	0.679892	0.00248228	ns	0.403985	0.109289	ns	unchanged
1783	B6DYQ0;P24473	Glutathione S-transferase kappa 1	Gstk1	0.158965	-0.0726901	ns	0.420221	0.0553734	ns	unchanged	0.645995	-0.0226335	ns	0.419039	0.0190437	ns	unchanged
1748	F1M2P8;F1LS98;B5DFC4;P05696	Protein kinase C;Protein kinase C alpha type	Prkca	1.55175e-07	-0.264007	FDR1%	0.0695131	0.0843152	ns	less syn	0.120558	0.139771	ns	8.79934e-08	0.2863	FDR1%	less deg
7160	Q9Z1B2;Q7M0B6	Glutathione S-transferase Mu 5	Gstm5	0.640248	-0.153664	ns	0.363605	0.108173	ns	unchanged	0.113769	-0.159901	ns	0.159688	0.0301636	ns	unchanged
902	A0A0G2K9A2;P85970;A0A0G2K905;A0A0G2K2J1;A0A0G2K1V8	Actin-related protein 2/3 complex subunit 2	Arpc2	0.000380583	-0.263863	FDR1%	0.0712841	0.0330295	ns	less syn	0.0345513	-0.116838	ns	2.66151e-05	0.0769129	FDR1%	less deg
1786	B6DYQ7;P04906;D4A8S2;A0A0G2K4Q5	Glutathione S-transferase P	Gstp1;RGD1307603	0.0977286	-0.0635406	ns	0.484592	0.0541893	ns	unchanged	0.551433	0.118119	ns	0.00512642	0.090092	ns	unchanged
777	A0A0G2K6H2;P57113	Maleylacetoacetate isomerase	Gstz1	0.171443	-0.0885549	ns	0.656736	0.0321429	ns	unchanged	0.236855	-0.0159896	ns	0.330413	-0.0171934	ns	unchanged
2553	D3ZVR7	Prostamide/prostaglandin F synthase	Fam213b	6.45824e-05	-0.263748	FDR1%	0.223378	0.0437174	ns	less syn	0.0123842	0.159094	ns	0.00080223	0.139715	FDR1%	less deg
1844	D2XV59	GTP-binding protein 1	Gtpbp1	0.67665	0.036156	ns	0.0197094	0.334607	ns	unchanged	0.16568	0.0269705	ns	0.470073	0.0599452	ns	unchanged
1672	B4F7F3		Arvcf	4.03944e-06	-0.263654	FDR1%	0.802148	0.0124354	ns	less syn	0.0440153	0.189453	ns	0.0168607	0.139134	ns	unchanged
5056	P62260	14-3-3 protein epsilon	Ywhae	3.94435e-11	-0.263376	FDR1%	0.378824	0.0217574	ns	less syn	0.85448	-0.0150203	ns	0.000848884	0.0660522	FDR1%	less deg
2189	D3ZIX4		H1fx	0.510972	-0.0320735	ns	0.0077315	0.122428	ns	unchanged	0.00499248	0.121836	ns	0.0383501	0.146845	ns	unchanged
4506	O88637-2;O88637	Ethanolamine-phosphate cytidylyltransferase	Pcyt2	0.011706	-0.190813	ns	2.29717e-06	0.150765	FDR1%	less deg	0.190446	-0.160236	ns	4.17232e-07	0.150883	FDR1%	less deg
4396	O08730;F8WFR6;A0A0G2JXP1	Glycogenin-1	Gyg1	0.910485	-0.0910281	ns	0.241023	0.0817187	ns	unchanged	0.837303	0.0178019	ns	0.143207	0.0979136	ns	unchanged
6310	Q641Z2;A0A0G2K6A2	Tyrosine-protein phosphatase non-receptor type 9	Ptpn9	0.0114983	-0.190843	ns	0.399253	0.0471651	ns	unchanged	0.000446768	-0.317505	FDR1%	0.0248525	0.107467	ns	less syn
4904	P43278	Histone H1.0;Histone H1.0, N-terminally processed	H1f0	0.167258	-0.12453	ns	0.962233	0.0401402	ns	unchanged	0.223603	-0.0236436	ns	0.594448	0.0792179	ns	unchanged
1199	A1L1K8		Habp4	0.11835	-0.197112	ns	0.4292	-0.0862466	ns	unchanged	0.00446132	-0.278896	ns	2.1363e-06	-0.330504	FDR1%	more deg
5259	Q02874;A0A140TAB4;Q02874-2	Core histone macro-H2A.1	H2afy	0.0159492	-0.155975	ns	0.155788	0.0414785	ns	unchanged	0.00229412	-0.118316	ns	0.10686	0.0355959	ns	unchanged
1422	B1WC28	Core histone macro-H2A	H2afy2	0.0378948	-0.136393	ns	0.184658	0.0920995	ns	unchanged	0.344416	-0.0823337	ns	0.175825	0.0670395	ns	unchanged
76	A0A0A0MXW3;D4AEC0;P0C0S7	Histone H2A;Histone H2A.Z	H2afz;H2afv	0.345464	-0.149497	ns	0.192229	0.0590728	ns	unchanged	0.223334	-0.113766	ns	0.913762	0.00768871	ns	unchanged
3489	F1LSR8;Q8CFG5	Voltage-dependent calcium channel subunit alpha-2/delta-3;Voltage-dependent calcium channel subunit alpha-2-3;Voltage-dependent calcium channel subunit delta-3	Cacna2d3	1.02355e-06	-0.29076	FDR1%	6.0522e-06	0.150823	FDR1%	slower turnover	0.00307166	-0.196342	ns	1.30743e-06	0.163365	FDR1%	less deg
6866	Q8CHM7;Q9JHT3	2-hydroxyacyl-CoA lyase 1	Hacl1	0.759357	0.0620024	ns	0.0655417	0.0907937	ns	unchanged	0.23319	-0.0860286	ns	0.393068	0.0483402	ns	unchanged
7145	Q9WVK7	Hydroxyacyl-coenzyme A dehydrogenase, mitochondrial	Hadh	0.510695	-0.0245694	ns	0.853224	0.0091449	ns	unchanged	0.756008	-0.0495551	ns	0.0969934	-0.041306	ns	unchanged
5556	Q4QQV4		Hars	0.05369	-0.0909404	ns	0.0794556	0.111413	ns	unchanged	0.00564918	-0.103923	ns	0.0330859	0.0933601	ns	unchanged
6158	Q60587	Trifunctional enzyme subunit beta, mitochondrial;3-ketoacyl-CoA thiolase	Hadhb	0.174492	-0.0920275	ns	0.731009	0.036909	ns	unchanged	0.304169	-0.0222412	ns	0.335142	-0.060612	ns	unchanged
2746	D4A133;A0A1W2Q6N0		Atp6v1a	2.03334e-09	-0.26271	FDR1%	0.0183246	0.0540988	ns	less syn	0.0136218	-0.0809989	ns	7.08205e-07	0.0878716	FDR1%	less deg
6543	Q6AYN4;Q6AYN4-2	Phytanoyl-CoA hydroxylase-interacting protein-like	Phyhipl	0.375834	0.0620274	ns	0.0015438	0.15096	FDR1%	less deg	2.40157e-20	-0.415897	FDR1%	0.113012	0.0376275	ns	less syn
6287	Q63768;Q63768-2	Adapter molecule crk	Crk	0.00518504	-0.152934	ns	0.90402	0.0377217	ns	unchanged	0.307775	0.100777	ns	8.89691e-06	0.187582	FDR1%	less deg
3769	F1M9C9;Q5EB72		Hars2	0.121095	-0.153381	ns	0.130332	0.0857188	ns	unchanged	0.190138	-0.155298	ns	0.434697	-0.0241061	ns	unchanged
2256	D3ZL85		Hccs	0.0140754	-0.117109	ns	0.10117	-0.0521769	ns	unchanged	0.000644967	-0.248475	FDR1%	0.115043	-0.0703427	ns	less syn
6823	Q7TSE9;Q7TSE9-5;Q7TSE9-3;M0R639;A0A096MKE1;B8YDD0;Q7TSE9-2;B8YDD1;Q7TSE9-6;M0RC50;B8YDD2;Q1XD58;A0A096MJ14	HCLS1-associated protein X-1	Hax1;LOC679116	0.95043	-0.0553964	ns	0.00357295	0.119442	ns	unchanged	0.438491	-0.0635175	ns	0.668292	0.0396405	ns	unchanged
616	A0A0G2K2P6;Q6AXM7	HBS1-like protein	Hbs1l	0.552834	-0.0845349	ns	0.111004	0.164965	ns	unchanged	0.338519	-0.0623926	ns	0.0126354	0.133187	ns	unchanged
5380	Q3B7U9	Peptidyl-prolyl cis-trans isomerase FKBP8	Fkbp8	5.93403e-11	-0.262521	FDR1%	0.0935248	0.127877	ns	less syn	3.44458e-05	-0.137938	FDR1%	0.609622	-0.0871501	ns	less syn
3202	D4AE31;A0A0G2K3C7		Fam126a	0.000726949	-0.261926	FDR1%	0.196677	0.0674904	ns	less syn	4.47903e-11	0.423678	FDR1%	0.00952164	0.11911	ns	more syn
1149	A0A1L5YJQ7;A0A0G2QC41;D3ZVD8		Hdac6	0.248743	-0.105306	ns	0.0209479	0.0875106	ns	unchanged	0.02893	0.132589	ns	0.00110392	0.152841	FDR1%	less deg
3464	F1LRY7;Q9JKA9	Potassium/sodium hyperpolarization-activated cyclic nucleotide-gated channel 2	Hcn2	0.921606	-0.01741	ns	0.0304582	0.159756	ns	unchanged	0.00234279	-0.284489	ns	0.684237	-0.00493726	ns	unchanged
6974	Q99P99;B0BNL3	Histone deacetylase 4	Hdac4	0.283972	-0.116193	ns	0.292578	-0.110386	ns	unchanged	0.343017	0.307875	ns	0.131594	-0.150278	ns	unchanged
2246	D3ZKT8		Hddc2	0.0824628	-0.398046	ns	0.577043	0.0265785	ns	unchanged	0.957713	-0.0138513	ns	0.0528719	0.12225	ns	unchanged
1568	B2RYT7		Hdhd3	0.0211071	-0.456644	ns	0.948295	0.0462898	ns	unchanged	0.00286439	-0.279922	ns	0.418235	0.0287446	ns	unchanged
3370	F1LPC7;Q8VHK7;M0R3J6	Hepatoma-derived growth factor	Hdgf	0.0114209	-0.2885	ns	0.491265	-0.109186	ns	unchanged	0.144324	-0.130486	ns	0.116113	-0.151781	ns	unchanged
6717	Q6QI86;Q6AYR6;P85007	Haloacid dehalogenase-like hydrolase domain-containing protein 2;Immediate early response 3-interacting protein 1	Hdhd2;Ier3ip1	0.434303	-0.0150085	ns	0.593051	0.129265	ns	unchanged	0.381006	-0.0438381	ns	0.060495	0.0739257	ns	unchanged
2257	D3ZL86;A0A0G2JV87		Heatr1	0.545259	-0.0845827	ns	0.11989	0.266168	ns	unchanged	0.75788	-0.115985	ns	0.487231	0.107834	ns	unchanged
6934	Q920L7;D4A612	Elongation of very long chain fatty acids protein 5;Elongation of very long chain fatty acids protein 2	Elovl5;Elovl2	0.346102	-0.087959	ns	0.0127116	0.241352	ns	unchanged	0.000783781	-0.313796	FDR1%	0.463896	0.0123915	ns	less syn
808	D3Z8D7;A0A0G2K743;P62856;D3ZJ54	40S ribosomal protein S26	LOC100361854;Rps26;RGD1565117	0.660539	0.0390551	ns	0.00181016	0.151143	FDR1%	less deg	0.0992649	-0.087395	ns	0.0863605	-0.15877	ns	unchanged
1664	B4F7C7		Hebp1	0.423084	-0.0725322	ns	0.868469	-0.00186936	ns	unchanged	0.311267	0.0436652	ns	0.40788	0.181966	ns	unchanged
3547	F1LVZ9		Hectd3	0.00661531	-0.225616	ns	0.0368861	0.159904	ns	unchanged	0.0131652	0.197832	ns	0.000153342	0.185224	FDR1%	less deg
5192	P84817;P84817-3;P84817-2	Mitochondrial fission 1 protein	Fis1	1.73304e-07	-0.261822	FDR1%	0.668225	-0.0351826	ns	less syn	9.07158e-06	-0.246495	FDR1%	0.113112	0.0469029	ns	less syn
4776	P21775;F1LPD6;P21775-2;P07871	3-ketoacyl-CoA thiolase A, peroxisomal;3-ketoacyl-CoA thiolase B, peroxisomal	Acaa1a;Acaa1b	0.000385174	-0.0984485	FDR1%	0.000229287	0.151236	FDR1%	slower turnover	0.0311575	-0.0610455	ns	0.0209661	0.0911251	ns	unchanged
3141	D4ACB8		Cct8	0.00116711	-0.112024	FDR1%	2.08966e-09	0.151544	FDR1%	slower turnover	0.924697	-0.000238726	ns	0.0318212	0.04824	ns	unchanged
3180	D4ADD3		Hecw2	0.00309404	-0.275464	ns	0.870331	0.0450059	ns	unchanged	2.15094e-07	-0.619282	FDR1%	0.376957	0.00806503	ns	less syn
6879	Q8K3P6	Calcium-binding mitochondrial carrier protein SCaMC-2	Slc25a25	0.00365842	-0.13417	ns	0.913235	0.038271	ns	unchanged	1.28012e-06	-0.308962	FDR1%	0.0430576	-0.0791365	ns	less syn
2047	D3ZEI4		Hepacam	0.22219	-0.0569038	ns	0.905772	-0.00207688	ns	unchanged	0.695162	0.00115728	ns	0.152357	-0.0484228	ns	unchanged
2321	D3ZNQ6	Myosin phosphatase Rho-interacting protein	Ube2m	0.0180149	-0.175494	ns	0.000118591	0.151656	FDR1%	less deg	0.296301	0.0144707	ns	3.16615e-05	0.169839	FDR1%	less deg
2735	D4A0X3		Btbd8	0.00177966	-0.26133	FDR1%	0.382077	-0.0611827	ns	less syn	0.00059644	-0.156513	FDR1%	0.0602192	0.071581	ns	less syn
1126	A0A140TAH1;Q9JJ50-2;Q9JJ50	Hepatocyte growth factor-regulated tyrosine kinase substrate	Hgs	0.128534	-0.0759029	ns	0.829309	0.0204735	ns	unchanged	0.431936	0.0807054	ns	0.986558	0.0670577	ns	unchanged
4822	P29266	3-hydroxyisobutyrate dehydrogenase, mitochondrial	Hibadh	0.365092	-0.0982196	ns	0.802596	0.00147911	ns	unchanged	0.987165	-0.0774181	ns	0.127464	-0.0179249	ns	unchanged
6103	Q5XIE6;Q5XIE6-2	3-hydroxyisobutyryl-CoA hydrolase, mitochondrial	Hibch	0.051686	-0.121878	ns	0.773154	-0.0113205	ns	unchanged	0.353963	-0.0820808	ns	0.15953	-0.0323247	ns	unchanged
2848	D4A3V2	NADH dehydrogenase [ubiquinone] 1 alpha subcomplex subunit 6	Ndufa6	1.33646e-09	-0.260602	FDR1%	0.736761	-0.0116966	ns	less syn	0.0016176	-0.140244	FDR1%	0.000469328	-0.108013	FDR1%	less syn & more deg
4146	G3V8Y8;Q8VHU1		Hip1	0.0995939	-0.0862453	ns	0.140038	0.0566521	ns	unchanged	0.000274675	-0.183949	FDR1%	0.692445	-0.0184983	ns	less syn
1769	B5DFK5;F1LML7;Q99PW9		Hip1r	0.0333664	0.0862682	ns	0.00455722	0.0892358	ns	unchanged	7.63689e-09	-0.412218	FDR1%	0.48339	0.00735498	ns	less syn
2913	F1LYK3;D4A5I4;F1M031		Nav1	2.32792e-20	-0.295734	FDR1%	2.64165e-06	0.151969	FDR1%	slower turnover	9.14956e-13	0.177914	FDR1%	0.0962642	0.0446979	ns	more syn
3775	F1M9G8;Q8K3P7;A0A0G2K7W8	Histidine triad nucleotide-binding protein 3	Hint3	0.039684	-0.214997	ns	0.281382	0.0423474	ns	unchanged	0.669955	-0.0213138	ns	0.0319921	0.178434	ns	unchanged
6960	Q99MI7	NEDD8-activating enzyme E1 catalytic subunit	Uba3	0.00367423	-0.120937	ns	3.28078e-07	0.152039	FDR1%	less deg	0.100245	0.070347	ns	0.00231907	0.116505	ns	unchanged
1750	B5DFC8	Eukaryotic translation initiation factor 3 subunit C	Eif3c	0.673001	-0.0375561	ns	4.48132e-06	0.15229	FDR1%	less deg	9.36698e-06	-0.168248	FDR1%	0.00911151	-0.155953	ns	less syn
2831	D4A3K5	Histone H1.1	Hist1h1a	0.116841	-0.107281	ns	0.282089	-0.230388	ns	unchanged	0.207983	-0.113638	ns	0.758624	0.0695772	ns	unchanged
1951	D3ZBN0	Histone H1.5	Hist1h1b	0.0311013	-0.0802107	ns	0.369666	-0.0591423	ns	unchanged	0.179587	-0.0702524	ns	0.420941	0.0148287	ns	unchanged
763	A0A0G2K654	Submitted name: Histone cluster 1 H1 family member c	Hist1h1c	0.548843	-0.0509776	ns	0.702914	-0.109947	ns	unchanged	0.0903005	-0.093023	ns	0.494891	0.0567395	ns	unchanged
4713	P15865	Histone H1.4	Hist1h1e	0.895207	-0.0212849	ns	0.590887	0.0357007	ns	unchanged	0.109086	-0.0700462	ns	0.137576	0.0630229	ns	unchanged
365	G3V9C7;G3V8B3;A0A0G2JXI9;M0R4L7;D3ZWM5;D3ZLY9;A0A0G2JXE0;D3ZNH4;Q00715;A0A0G2K7R1;Q9Z2R0;Q7M0A0	Histone H2B;Histone H2B type 1	Hist1h2bk;LOC100910200;Hist1h2bl;Hist1h2bb;Hist1h2bh;Hist1h2bo;Hist1h2bq;Hist1h2bcl1	0.3073	-0.115979	ns	0.612238	-0.0131626	ns	unchanged	0.610678	-0.0271258	ns	0.183334	0.0684352	ns	unchanged
5076	P62804	Histone H4;Osteogenic growth peptide	Hist1h4b	0.163472	-0.0890239	ns	0.572277	-0.00995468	ns	unchanged	0.97668	0.00334658	ns	0.197044	0.0165262	ns	unchanged
2328	M0RBQ5;D4A817;D3ZNZ9	Histone H2B	Hist3h2bb;LOC100912338;Hist3h2ba	0.645661	-0.0554753	ns	0.742877	0.0499042	ns	unchanged	0.934867	0.0464042	ns	0.619082	-0.0118199	ns	unchanged
4340	M0RAQ6	Hexokinase	Hk1	0.488671	-0.254936	ns	0.396584	0.020654	ns	unchanged	0.8204	-0.117412	ns	0.4145	-0.0571811	ns	unchanged
4751	P19627	IQ motif and Sec7 domain 2	Gnaz	0.000880161	-0.259364	FDR1%	0.269022	0.0734899	ns	less syn	0.767795	-0.0254343	ns	0.0177686	0.0836737	ns	unchanged
108	A0A0G2JSJ2;Q4KM73;A0A0G2JTN5	UMP-CMP kinase	Cmpk1	0.642301	-0.0823773	ns	0.000135224	0.15245	FDR1%	less deg	0.817861	-0.0493795	ns	2.14074e-05	0.172306	FDR1%	less deg
788	D3ZCR3;A0A0G2K6P4;B4F758;P63159;D3ZXR5;D3ZLG3;D4A6A9;D3ZIU9;D3ZC69;M0R7R5;F1LNG6;Q7TPK9;D3ZGW6	High mobility group protein B1	Hmg1l1;Hmgb1;RGD1560584;RGD1563668;LOC100911637;Hmgb1-ps3	0.688323	0.000384149	ns	0.0462509	0.190716	ns	unchanged	0.360415	-0.024992	ns	0.155586	0.0637497	ns	unchanged
4964	P52925;D3ZS25;D3ZN59	High mobility group protein B2	Hmgb2;RGD1561694;LOC100911856	0.634845	0.00520513	ns	0.563424	-0.0777284	ns	unchanged	0.920342	0.0606586	ns	0.935999	0.0567038	ns	unchanged
5203	P97519	Hydroxymethylglutaryl-CoA lyase, mitochondrial	Hmgcl	0.0147659	-0.161535	ns	0.459469	0.0404617	ns	unchanged	0.0475773	-0.133429	ns	0.264193	-0.0222745	ns	unchanged
2854	I6L9I0;D4A414		Cox15	0.00163186	-0.259311	FDR1%	0.227419	0.0810904	ns	less syn	0.195781	-0.0379476	ns	0.171009	-0.0727232	ns	unchanged
4783	Q68G44;P22791	Hydroxymethylglutaryl-CoA synthase, mitochondrial	Hmgcs2	0.0341396	-0.184211	ns	0.908284	-0.0269713	ns	unchanged	0.0887845	-0.155128	ns	0.31347	-0.0897179	ns	unchanged
4575	P06762	Heme oxygenase 1	Hmox1	0.657825	0.129787	ns	0.714516	0.069758	ns	unchanged	0.764111	0.0982933	ns	0.528331	-0.00260913	ns	unchanged
7061	Q9JKS6;Q9JKS6-3;Q9JKS6-2	Protein piccolo	Pclo	3.34229e-05	-0.259032	FDR1%	0.782056	-0.0114723	ns	less syn	6.75337e-05	-0.266152	FDR1%	0.107908	0.0924259	ns	less syn
3	A0A059NZR0;Q6AXU6	Hematological and neurological expressed 1 protein;Hematological and neurological expressed 1 protein, N-terminally processed	Hn1	0.289315	-0.0946233	ns	0.560878	0.00151194	ns	unchanged	0.277971	0.173236	ns	0.0271178	0.342221	ns	unchanged
150	A0A0G2JT23;D3ZA69		Nrbp2	0.00257838	-0.259005	FDR1%	0.00230497	0.155782	ns	less syn	0.184287	0.0736313	ns	0.000234486	0.191641	FDR1%	less deg
4549	Q6P6G9;Q5I0M7;P04256;F1M2S4;D4ACJ7;A0A0G2K3G4;F1M6C7	Heterogeneous nuclear ribonucleoprotein A1;Heterogeneous nuclear ribonucleoprotein A1, N-terminally processed	Hnrnpa1;Hnrpa1	0.0748996	-0.13603	ns	0.532854	0.0174844	ns	unchanged	0.0385532	-0.0980567	ns	0.818618	-0.0207974	ns	unchanged
4435	O35532	Methylsterol monooxygenase 1	Msmo1	0.000948745	-0.258089	FDR1%	0.064856	0.178751	ns	less syn	9.14213e-11	-1.01276	FDR1%	0.0772673	-0.253916	ns	less syn
6739	Q6URK4	Heterogeneous nuclear ribonucleoprotein A3	Hnrnpa3	0.534387	-0.0545538	ns	0.224896	-0.100039	ns	unchanged	0.768807	0.0547222	ns	0.35404	-0.117749	ns	unchanged
6740	Q6URK4-2;E9PSU5;D4A6A2	Heterogeneous nuclear ribonucleoprotein A3	Hnrnpa3	0.109909	-0.155959	ns	0.0212654	0.11517	ns	unchanged	0.660539	-0.116827	ns	0.163971	0.0820565	ns	unchanged
1680	B5DEI0		Pcyox1l	0.000775473	-0.162213	FDR1%	0.000473079	0.153046	FDR1%	slower turnover	0.866377	-0.0524222	ns	0.787914	-0.00395975	ns	unchanged
7043	Q9JJ54-3;Q9JJ54;Q9JJ54-4;Q9JJ54-2	Heterogeneous nuclear ribonucleoprotein D0	Hnrnpd	0.0300723	-0.1774	ns	0.0138806	0.0555093	ns	unchanged	0.075164	-0.0770769	ns	0.467751	-0.0132455	ns	unchanged
605	D3ZQL7;A0A0G2K2D6		Tppp	0.00180865	-0.257597	FDR1%	0.564171	0.0299462	ns	less syn	0.804695	-0.00408545	ns	6.64576e-05	0.304513	FDR1%	less deg
6320	Q642A9		Vps16	0.00460169	-0.128863	ns	9.0952e-07	0.153788	FDR1%	less deg	0.180971	0.0991913	ns	0.50001	0.0876381	ns	unchanged
6062	Q5XI34;O35511		Ppp2r1a;PP2A ARa	1.9279e-13	-0.214934	FDR1%	2.80316e-06	0.153883	FDR1%	slower turnover	0.016234	-0.0582105	ns	7.61432e-08	0.183932	FDR1%	less deg
4495	Q9QX80;Q9Z0U8;O88311;Q9QX81		Hnrnpab;alf-c1	0.330619	-0.0481571	ns	0.147548	0.0828995	ns	unchanged	0.900698	-0.0630492	ns	0.829629	-0.0732592	ns	unchanged
6032	Q5U3Z5		Bri3bp	0.000486707	-0.256967	FDR1%	0.00332786	0.172923	ns	less syn	6.52692e-06	-0.219488	FDR1%	0.308051	-0.0218529	ns	less syn
3114	D4ABK7		Hnrnph3	0.0114566	-0.136365	ns	0.0157495	0.0734842	ns	unchanged	0.064002	-0.0776744	ns	0.253548	0.0500761	ns	unchanged
2922	D4A5R0;D3ZUZ9	Peptidyl-prolyl cis-trans isomerase	Ppih	1.07957e-05	-0.256679	FDR1%	0.0136484	0.161817	ns	less syn	0.0212695	0.130661	ns	0.00725162	0.18602	ns	unchanged
6136	Q5XIN4;Q8K3W5		Mtmr9	0.00268759	-0.256661	FDR1%	0.737974	0.226851	ns	less syn	0.860972	-0.0714984	ns	0.795547	0.00350285	ns	unchanged
4765	Q8CH85;Q80WY4;P20595;Q80WY5	Guanylate cyclase soluble subunit beta-1	Gucy1b3	3.50898e-06	-0.256516	FDR1%	0.689846	-0.0261851	ns	less syn	2.04025e-08	-0.33449	FDR1%	0.000692144	0.146945	FDR1%	slower turnover
3707	F1M6W2;Q6UPR8	Endoplasmic reticulum metallopeptidase 1	Ermp1	0.00124973	-0.133258	FDR1%	2.32577e-07	0.153909	FDR1%	slower turnover	0.246569	-0.0403296	ns	0.171637	-0.0691398	ns	unchanged
6933	Q920L2;Q0QF18	Succinate dehydrogenase [ubiquinone] flavoprotein subunit, mitochondrial	Sdha	7.64014e-12	-0.256397	FDR1%	0.068467	-0.00653009	ns	less syn	2.41432e-05	-0.138081	FDR1%	9.82153e-07	-0.0405445	FDR1%	less syn & more deg
4427	O35314	Secretogranin-1;PE-11;CCB peptide short form;CCB peptide long form	Chgb	2.161e-06	-0.256194	FDR1%	0.808866	-0.0518779	ns	less syn	7.25993e-19	0.745988	FDR1%	7.99458e-13	0.665447	FDR1%	more syn & less deg
4519	O88801;O88801-2	Homer protein homolog 2	Homer2	0.310739	-0.101795	ns	0.37728	-0.0655934	ns	unchanged	0.244183	-0.0571676	ns	0.183325	0.135229	ns	unchanged
7122	Q9R1Z0-2	Voltage-dependent anion-selective channel protein 3	Vdac3	0.000235362	-0.256129	FDR1%	0.675324	0.059152	ns	less syn	0.732446	0.0438039	ns	0.0300577	0.0597508	ns	unchanged
1755	B5DFF7;G3V9L3;A0A0G2K3I9		Dusp3	7.93245e-06	-0.382491	FDR1%	6.28321e-05	0.154264	FDR1%	slower turnover	0.00174688	-0.249356	FDR1%	2.15331e-06	0.172527	FDR1%	slower turnover
6190	Q62824;M0R649;M0RBF8	Exocyst complex component 4	Exoc4	0.00137734	-0.155991	FDR1%	0.000142583	0.154293	FDR1%	slower turnover	0.21625	-0.0417446	ns	0.955244	0.0524137	ns	unchanged
6207	Q62950	Dihydropyrimidinase-related protein 1	Crmp1	0.0251928	-0.1088	ns	0.192778	-0.0207805	ns	unchanged	0.27887	0.0713683	ns	1.23287e-18	0.184614	FDR1%	less deg
3781	F1M9V7;Q3B8Q9;Q8VID2		Npepps	9.58737e-09	-0.255915	FDR1%	0.600304	0.0288215	ns	less syn	0.00380493	0.0716616	ns	4.28265e-06	0.143597	FDR1%	less deg
3671	F1M4B6	Submitted name: Similar to RIKEN cDNA 9330182L06	RGD1563349	0.522406	-0.073938	ns	0.000512597	0.154582	FDR1%	less deg	0.363957	-0.0950236	ns	0.38372	-0.0861303	ns	unchanged
6890	Q8R2H0;A0A0G2K2R1		Atp6v1g2	0.00115627	-0.255489	FDR1%	0.0928847	0.059361	ns	less syn	0.506289	-0.0477182	ns	0.0396448	0.0836475	ns	unchanged
6817	Q7TQ77		Hook3	0.595162	-0.0755663	ns	0.0161087	0.272174	ns	unchanged	0.783008	0.0336727	ns	0.840719	-0.0899003	ns	unchanged
4963	P52759	Ribonuclease UK114	Hrsp12	0.570069	-0.0354323	ns	0.0295881	-0.0505651	ns	unchanged	0.331189	0.103073	ns	0.101561	0.0649562	ns	unchanged
2941	D4A6D9		Hs1bp3	0.137051	-0.105859	ns	0.12687	0.0757277	ns	unchanged	0.4779	-0.0534927	ns	0.736164	0.0857084	ns	unchanged
2075	D3ZF97		Erlec1	0.00092238	-0.138488	FDR1%	4.35846e-06	0.15461	FDR1%	slower turnover	8.94305e-05	-0.23871	FDR1%	0.330258	-0.032943	ns	less syn
1689	B5DEL8;A0A0G2JZJ9		LOC100361505	7.10427e-06	-0.25547	FDR1%	0.329929	0.00146474	ns	less syn	0.146255	-0.151786	ns	0.145405	-0.035697	ns	unchanged
1255	B0BMW2;O70351	3-hydroxyacyl-CoA dehydrogenase type-2	Hsd17b10	0.193786	-0.0924109	ns	0.696542	0.0218138	ns	unchanged	0.107037	-0.086122	ns	0.680488	0.017195	ns	unchanged
452	A0A0G2JZG7;Q6P799	Serine--tRNA ligase, cytoplasmic	Sars	0.0873428	-0.0494077	ns	0.000332634	0.15492	FDR1%	less deg	5.23999e-10	-0.288198	FDR1%	0.189382	-0.0556103	ns	less syn
5230	Q6IN39;P97852	Peroxisomal multifunctional enzyme type 2;(3R)-hydroxyacyl-CoA dehydrogenase;Enoyl-CoA hydratase 2	Hsd17b4	0.0359584	-0.0363592	ns	0.00694465	0.0750003	ns	unchanged	0.0947627	-0.0678722	ns	0.00161176	0.0705493	ns	unchanged
3098	D4AB01		Hint2	9.67466e-05	-0.254963	FDR1%	0.476733	0.00119905	ns	less syn	0.764404	0.0144105	ns	0.751234	-0.0307658	ns	unchanged
6634	Q6MGB5;A0A0G2K6P1;Q5BJM1	Estradiol 17-beta-dehydrogenase 8	Hsd17b8	0.0435968	-0.256644	ns	0.364985	-0.0372026	ns	unchanged	0.933906	-0.075321	ns	0.608408	-0.0567366	ns	unchanged
5600	Q4V8B7	Inactive hydroxysteroid dehydrogenase-like protein 1	Hsdl1	0.00385732	-0.216461	ns	0.0288523	0.0687991	ns	unchanged	0.400407	0.148812	ns	0.968576	0.0105904	ns	unchanged
5610	Q4V8F9	Hydroxysteroid dehydrogenase-like protein 2	Hsdl2	0.149016	-0.0957738	ns	0.170766	-0.000652175	ns	unchanged	0.421766	-0.0155781	ns	0.110881	-0.110591	ns	unchanged
5883	Q5PPJ6		Lars	0.260122	-0.0237415	ns	7.1373e-10	0.155071	FDR1%	less deg	0.000678515	-0.098238	FDR1%	0.042812	-0.0745801	ns	less syn
4563	P05708	Hexokinase-1	Hk1	9.19175e-05	-0.25486	FDR1%	0.133581	-0.0278513	ns	less syn	0.00467812	-0.165804	ns	0.510235	0.0256613	ns	unchanged
5133	P63312;CON__P21752	Thymosin beta-10	Tmsb10	0.00263524	-0.254804	FDR1%	0.00572939	-0.129946	ns	less syn	0.765237	-0.000393399	ns	3.21906e-07	0.380133	FDR1%	less deg
6854	Q8CF97	Deubiquitinating protein VCIP135	Vcpip1	1.05802e-07	-0.254751	FDR1%	0.11936	0.0876798	ns	less syn	0.0445115	0.0631177	ns	0.00337145	0.139268	ns	unchanged
6676	Q6P7Q1	BRCA1-A complex subunit BRE	Bre	0.0026301	-0.144517	FDR1%	0.00054792	0.155088	FDR1%	slower turnover	0.0516775	-0.0415643	ns	0.118589	0.0433193	ns	unchanged
3850	F7F2F3;B4F772		Hspa4l	0.492909	-0.0234955	ns	0.153166	0.0480382	ns	unchanged	1.56045e-16	-0.409441	FDR1%	0.0543936	0.0636257	ns	less syn
4700	P14659;A0A0G2JUT0	Heat shock-related 70 kDa protein 2	Hspa2	0.0138789	-0.186616	ns	0.121162	0.0895524	ns	unchanged	0.798221	-0.0104175	ns	0.333703	0.0633767	ns	unchanged
368	A0A0G2JXK7;Q68FS3	F-box only protein 7	Fbxo7	0.355125	-0.0847643	ns	0.34255	0.00781689	ns	unchanged	0.835234	0.00279676	ns	0.000311405	0.184132	FDR1%	less deg
4431	O35394	Prenylated Rab acceptor protein 1	Rabac1	NA	NA	NA	NA	NA	NA	NA	4.90563e-06	-0.297422	FDR1%	0.191188	-0.385631	ns	less syn
3047	D4A997		Htatsf1	NA	NA	NA	NA	NA	NA	NA	0.00478064	0.24845	ns	0.579491	0.0238855	ns	unchanged
4663	P11654	Nuclear pore membrane glycoprotein 210	Nup210	0.704221	-0.0761628	ns	2.80625e-05	0.155824	FDR1%	less deg	0.707842	-0.0411524	ns	0.747087	-0.015567	ns	unchanged
6172	Q62688;A0A0G2K4N6;F1LP62	Inactive phospholipase C-like protein 1;Phosphoinositide phospholipase C	Plcl1	0.532128	0.0837537	ns	8.4537e-05	0.15607	FDR1%	less deg	0.000789895	-0.215449	FDR1%	0.752516	0.0677754	ns	less syn
6588	Q6IMX7	Hsp70-binding protein 1	Hspbp1	0.130882	-0.105463	ns	0.00976292	0.215598	ns	unchanged	0.0928835	-0.0653096	ns	0.482709	-0.0265715	ns	unchanged
5131	P63259	Actin, cytoplasmic 2;Actin, cytoplasmic 2, N-terminally processed	Actg1	0.00163002	-0.254316	FDR1%	0.345709	-0.0107533	ns	less syn	0.0573503	-0.171733	ns	0.254523	-0.0396636	ns	unchanged
4805	P26772;P97601;A0A0G2JTG1	10 kDa heat shock protein, mitochondrial	Hspe1	0.0923753	-0.110998	ns	0.122361	0.000789532	ns	unchanged	0.0105453	-0.174452	ns	0.034687	-0.0157991	ns	unchanged
1613	B2RZB5		Chmp2a	0.00143798	-0.1414	FDR1%	0.000294007	0.157106	FDR1%	slower turnover	0.308235	0.0533956	ns	0.0341979	0.118546	ns	unchanged
1302	B0BNB9		Htra2	0.153854	-0.123184	ns	0.0600022	-0.047	ns	unchanged	0.234114	-0.131483	ns	0.0711238	-0.0129414	ns	unchanged
7105	Q9QZK5	Serine protease HTRA1	Htra1	0.0285956	0.215267	ns	0.340659	0.0527483	ns	unchanged	0.374224	-0.144621	ns	0.052019	0.000876382	ns	unchanged
4476	O70196;A0A0G2K1M8	Prolyl endopeptidase	Prep	0.490334	-0.0709493	ns	6.07863e-08	0.157466	FDR1%	less deg	0.0281792	0.096611	ns	1.71389e-08	0.194476	FDR1%	less deg
6024	Q5U322;D4A8X4		Cpe	0.000534007	-0.253492	FDR1%	0.183113	0.0966328	ns	less syn	1.24703e-13	1.04909	FDR1%	7.3764e-11	1.05593	FDR1%	more syn & less deg
4962	P52631	Signal transducer and activator of transcription 3	Stat3	0.379703	-0.0221146	ns	0.160242	0.182224	ns	unchanged	1.83708e-06	-0.296945	FDR1%	0.503683	-0.270377	ns	less syn
1700	B5DER3;Q711G3	Isoamyl acetate-hydrolyzing esterase 1 homolog	Iah1	0.544441	-0.0841868	ns	0.274886	0.0320573	ns	unchanged	0.0870567	0.0960905	ns	0.472524	0.0937496	ns	unchanged
2786	D4A249		Mblac2	1.92274e-05	-0.25331	FDR1%	0.112089	0.120323	ns	less syn	0.0556237	-0.184965	ns	0.502678	0.052202	ns	unchanged
595	A0A0G2K261	Submitted name: Isoleucyl-tRNA synthetase 2, mitochondrial	Iars2	0.141976	-0.0966161	ns	0.726931	-0.0071346	ns	unchanged	0.237798	-0.116292	ns	0.0124604	-0.0657816	ns	unchanged
4544	P03994;A1A5N6;P03994-2	Hyaluronan and proteoglycan link protein 1	Hapln1	0.0867189	-0.20745	ns	5.09454e-09	0.157664	FDR1%	less deg	2.83872e-29	-1.19896	FDR1%	1.44052e-05	0.15788	FDR1%	slower turnover
2225	D3ZK73		Cul4b	0.445548	-0.206252	ns	0.000962468	0.157754	FDR1%	less deg	NA	NA	NA	NA	NA	NA	NA
6751	Q6XVN8	Microtubule-associated proteins 1A/1B light chain 3A	Map1lc3a	0.000270522	-0.253046	FDR1%	0.113965	0.195834	ns	less syn	0.000749595	-0.25021	FDR1%	0.266349	0.0753452	ns	less syn
4790	P23978	Sodium- and chloride-dependent GABA transporter 1	Slc6a1	2.93071e-06	-0.252122	FDR1%	0.333904	0.0631938	ns	less syn	3.00594e-09	-0.400122	FDR1%	0.188091	-0.0254794	ns	less syn
5659	Q568Z4	Signal peptidase complex subunit 3	Spcs3	0.479652	-0.0915455	ns	0.000838319	0.157792	FDR1%	less deg	0.0658056	-0.101363	ns	0.753191	-0.0150308	ns	unchanged
3633	F1M1D5		Tbcd	0.0329901	-0.138548	ns	0.00189316	0.158007	FDR1%	less deg	0.00286932	-0.178351	ns	0.00167887	0.142538	ns	unchanged
1490	B2GV87-3;B2GV87-2;B2GV87;P70530;P70529	Receptor-type tyrosine-protein phosphatase epsilon	Ptpre	4.3929e-05	-0.251899	FDR1%	0.0175508	0.128768	ns	less syn	0.00469592	-0.218141	ns	0.899649	0.0353431	ns	unchanged
3186	D4ADG2		Iba57	0.78996	-0.115336	ns	0.574504	-0.052536	ns	unchanged	0.203823	0.0659458	ns	0.800272	0.0107296	ns	unchanged
2610	D3ZX42		Rabgap1	9.46519e-05	-0.179328	FDR1%	0.000153298	0.158078	FDR1%	slower turnover	0.535309	0.0147344	ns	0.994634	-0.00238581	ns	unchanged
5476	Q499T2	Gamma-interferon-inducible lysosomal thiol reductase	Ifi30	0.0431891	0.334239	ns	0.522926	0.07096	ns	unchanged	0.176842	0.0374036	ns	0.157159	0.0637066	ns	unchanged
1110	A0A140TAB8;P24062	Insulin-like growth factor 1 receptor;Insulin-like growth factor 1 receptor alpha chain;Insulin-like growth factor 1 receptor beta chain	Igf1r	0.0171094	-0.156768	ns	0.00778835	0.129228	ns	unchanged	0.351876	-0.0153105	ns	0.00608993	0.13874	ns	unchanged
2240	Q9ERS3;D3ZKP9;Q8CFG7;A0A0G2K7E5;Q8VHS9;P54290;A0A0G2K8L7	Voltage-dependent calcium channel subunit alpha-2/delta-1;Voltage-dependent calcium channel subunit alpha-2-1;Voltage-dependent calcium channel subunit delta-1	Cacna2d1	4.02241e-08	-0.251782	FDR1%	0.00549522	0.0888333	ns	less syn	9.0191e-11	-0.377373	FDR1%	0.364024	0.053791	ns	less syn
6098	Q5XID1	Anamorsin	Ciapin1	0.891938	-0.0213444	ns	0.224427	0.110844	ns	unchanged	5.3104e-06	-0.295067	FDR1%	0.67888	-0.0341468	ns	less syn
5562	Q7TPI7;Q4QR85	Methylosome protein 50	LOC100911453;Wdr77	0.0023229	-0.251607	FDR1%	0.232248	0.0816131	ns	less syn	0.456661	0.130101	ns	0.0410151	0.147853	ns	unchanged
6230	Q63198	Contactin-1	Cntn1	1.98662e-40	-0.312864	FDR1%	6.678e-20	0.158165	FDR1%	slower turnover	7.0731e-06	-0.0960058	FDR1%	1.48519e-28	0.173893	FDR1%	slower turnover
4973	P54001	Prolyl 4-hydroxylase subunit alpha-1	P4ha1	0.537322	-0.0745028	ns	0.790845	0.141746	ns	unchanged	0.00133948	-0.292954	FDR1%	0.100677	-0.185759	ns	less syn
5768	Q5FVM7	DnaJ homolog subfamily C member 16	Dnajc16	0.000245683	-0.251436	FDR1%	0.185647	0.0661609	ns	less syn	0.220646	-0.279812	ns	0.00443946	-0.347242	ns	unchanged
536	A0A0G2K0Y2;Q7TP50;D3ZWZ6		Igf2bp3;Igf2bp2	0.603944	0.0629586	ns	0.228666	0.154111	ns	unchanged	0.870486	0.112383	ns	0.635314	0.0358191	ns	unchanged
6387	Q66HG8;A0A0G2K5G9;Q6QI75	Protein Red	Ik;Wdr55	0.100389	-0.142654	ns	0.303009	0.333018	ns	unchanged	0.162908	-0.196393	ns	0.946406	-0.00705558	ns	unchanged
6896	Q8R4A1;Q8R4A1-2	ERO1-like protein alpha	Ero1l	1.42748e-07	-0.2514	FDR1%	0.696939	0.00976661	ns	less syn	2.59108e-20	-0.54182	FDR1%	7.06028e-07	-0.194947	FDR1%	less syn & more deg
4063	G3V826	Transketolase	Tkt	0.492105	-0.141557	ns	4.65349e-05	0.158288	FDR1%	less deg	0.801798	-0.0286042	ns	5.61976e-06	0.209473	FDR1%	less deg
4658	P11497-2;P11497;D3ZRA3;A0A0G2K5G8	Acetyl-CoA carboxylase 1;Biotin carboxylase	Acaca	1.01519e-07	-0.220986	FDR1%	2.31045e-06	0.158457	FDR1%	slower turnover	0.463727	0.0514089	ns	3.36384e-08	0.125104	FDR1%	less deg
6951	Q99J82	Integrin-linked protein kinase	Ilk	0.865139	-0.0299885	ns	0.0786654	0.0607885	ns	unchanged	NA	NA	NA	NA	NA	NA	NA
3540	F1LVR0		Iglon5	0.41231	-0.0891287	ns	0.014077	0.0718594	ns	unchanged	1.5415e-06	-0.381044	FDR1%	0.111183	0.0471801	ns	less syn
1938	D3ZB78		RGD1559864	0.000161043	-0.251333	FDR1%	0.57137	-0.00653796	ns	less syn	0.0112494	-0.185834	ns	0.849464	0.06644	ns	unchanged
3764	F1M978;P97697;P97618	Inositol monophosphatase 1	Impa1	0.303466	-0.123351	ns	0.230475	0.0230141	ns	unchanged	0.20444	0.00195255	ns	0.758525	0.190401	ns	unchanged
1712	B5DF01;D3ZTB4		Vps11	0.0225544	-0.128002	ns	0.000483076	0.15864	FDR1%	less deg	0.35212	0.0578877	ns	0.019911	0.0813485	ns	unchanged
3172	D4AD37;Q7TPJ5	Inositol monophosphatase 3	Impad1;LOC100910881	0.920742	-0.0040591	ns	0.0575035	0.246783	ns	unchanged	0.279531	-0.0527714	ns	0.514749	-0.0544891	ns	unchanged
2278	D3ZLZ7;A0A0A0MXZ8	Inosine-5-monophosphate dehydrogenase 1;Inosine-5-monophosphate dehydrogenase	Impdh1	0.10909	-0.120327	ns	0.0538839	0.252657	ns	unchanged	0.929511	-0.0290208	ns	0.040784	0.138584	ns	unchanged
5441	Q45QK6;M0RBJ0;O35355	Guanine nucleotide-binding protein subunit gamma	Gng2	0.0382778	-0.230754	ns	0.128853	-0.0386666	ns	unchanged	0.554566	-0.0893947	ns	5.60828e-09	0.183325	FDR1%	less deg
1865	D3Z8P1		Rnf7	0.204819	-0.176264	ns	0.00111962	0.159424	FDR1%	less deg	0.317004	0.0843536	ns	0.000218996	0.207327	FDR1%	less deg
5826	Q5M7T6		Atp6v0d1	1.46764e-05	-0.250587	FDR1%	0.188511	0.012947	ns	less syn	0.006548	-0.160822	ns	5.48264e-05	0.0947576	FDR1%	less deg
4512	Q9QUI9;O88768;A0A0G2K7U5;Q63629;D3ZQG5;Q9JK15	Arf-GAP with dual PH domain-containing protein 2	Adap1;Adap2	0.0317572	-0.141112	ns	0.0234957	0.0759683	ns	unchanged	0.18723	0.12278	ns	4.39158e-05	0.182927	FDR1%	less deg
6559	Q6AYT7	Monoacylglycerol lipase ABHD12	Abhd12	0.395786	-0.0041473	ns	0.0121138	0.219188	ns	unchanged	3.27918e-06	-0.289831	FDR1%	0.610253	-0.0614878	ns	less syn
1759	B5DFI3		Ap1s1	0.000335409	-0.250366	FDR1%	0.4562	0.0482571	ns	less syn	0.946686	-0.0429605	ns	0.1667	0.0870277	ns	unchanged
6432	Q68FX1	Mannose-6-phosphate isomerase	Mpi	0.00682273	-0.165093	ns	0.00672152	0.13759	ns	unchanged	0.996779	0.0225012	ns	0.000994174	0.18268	FDR1%	less deg
1306	B0BNE5	S-formylglutathione hydrolase	Esd	0.41115	-0.0660778	ns	1.78079e-10	0.159513	FDR1%	less deg	0.128327	0.0384304	ns	4.03427e-14	0.20361	FDR1%	less deg
1936	D3ZB51		Igsf9b	0.0417986	-0.151207	ns	0.313376	0.00688026	ns	unchanged	NA	NA	NA	NA	NA	NA	NA
4906	P45592;M0R6D6	Cofilin-1	Cfl1	2.797e-09	-0.208828	FDR1%	1.60205e-06	0.159662	FDR1%	slower turnover	0.04423	-0.0541034	ns	0.00624861	0.0956549	ns	unchanged
1617	B2RZC6		Ilf2	0.333664	-0.152313	ns	0.398513	0.0103297	ns	unchanged	0.564122	-0.0542376	ns	0.597178	-0.0235086	ns	unchanged
4371	M0RD40		Sik3	4.53971e-05	-0.250326	FDR1%	0.00844817	0.0875654	ns	less syn	0.828753	0.0046332	ns	2.70364e-06	0.196102	FDR1%	less deg
5015	P60522;F1M1J6	Gamma-aminobutyric acid receptor-associated protein-like 2	Gabarapl2;RGD1562165	1.4516e-09	-0.250023	FDR1%	0.0170994	0.212083	ns	less syn	1.25995e-11	-0.283856	FDR1%	0.266825	0.0784161	ns	less syn
6428	Q68FW4	Syntaxin-18	Stx18	0.0153029	-0.120646	ns	0.544373	0.202284	ns	unchanged	0.000260419	-0.288817	FDR1%	0.124781	-0.109006	ns	less syn
4246	M0R567;Q5EIC4	Interferon regulatory factor 2-binding protein-like	Irf2bpl	0.78909	-0.0396825	ns	0.00497208	0.441087	ns	unchanged	NA	NA	NA	NA	NA	NA	NA
6189_m	Q62807;A0A0G2K9H6;A0A0U1RRV6;A0A0U1RRS2	Synaptotagmin-17	Syt17	0.00120293	-0.249674	FDR1%	0.159049	0.0214758	ns	less syn	1.17029e-06	-0.497419	FDR1%	0.876499	0.0275294	ns	less syn
3231	D4AEP0	Adenylosuccinate synthetase isozyme 2	Adss	1.04866e-05	-0.249604	FDR1%	0.0522071	0.151037	ns	less syn	0.186137	0.0261433	ns	3.08644e-06	0.143231	FDR1%	less deg
5090	P62912;D4A412;D4A647	60S ribosomal protein L32	Rpl32;LOC688684;Gm21893	0.453977	5.42796e-05	ns	4.4612e-08	0.1599	FDR1%	less deg	0.876486	-0.0263666	ns	0.00576181	-0.0941688	ns	unchanged
3144	D4ACG2		Ilvbl	0.718065	-0.0500379	ns	0.19613	0.134104	ns	unchanged	0.591819	-0.16125	ns	0.512431	-0.0408412	ns	unchanged
6618	Q6MG06;A0A0G2K6Q5;A0A0G2K444;Q5XI09	Guanine nucleotide-binding protein-like 1	Gnl1	8.32653e-05	-0.242479	FDR1%	0.000133625	0.159936	FDR1%	slower turnover	0.0272475	-0.151733	ns	0.000372084	0.124745	FDR1%	less deg
4938	P50398	Rab GDP dissociation inhibitor alpha	Gdi1	0.0151159	-0.216442	ns	0.125403	0.0589014	ns	unchanged	0.865927	0.0790242	ns	8.38036e-05	0.181201	FDR1%	less deg
2706	D3ZZX1		Inpp5a	0.491134	0.00404598	ns	0.707552	0.071762	ns	unchanged	4.13545e-09	-0.514913	FDR1%	0.147512	-0.0550009	ns	less syn
3487	F1LSQ0;Q924K2	FAS-associated factor 1	Faf1	0.721451	-0.0866186	ns	0.274575	0.113502	ns	unchanged	0.000215166	-0.288159	FDR1%	0.977412	0.0410472	ns	less syn
635	A0A0G2K2Z2;Q5XIU8;A0A0G2K5K7		Inpp5k	NA	NA	NA	NA	NA	NA	NA	0.895241	-0.0506466	ns	0.662989	-0.0367908	ns	unchanged
3839	F7EPH4;Q499R7;A0A0G2JUD2		Ppa1	0.129003	-0.114146	ns	0.000140953	0.160178	FDR1%	less deg	2.42958e-06	-0.246183	FDR1%	0.000929085	0.10803	FDR1%	slower turnover
375	D4A8D5;A0A0G2JXT8		Flnb	0.523708	0.094466	ns	9.37243e-05	0.161017	FDR1%	less deg	0.121264	-0.115198	ns	0.232263	0.065728	ns	unchanged
4764	P20417	Tyrosine-protein phosphatase non-receptor type 1	Ptpn1	0.000693823	-0.248833	FDR1%	0.177092	0.134551	ns	less syn	0.00322493	-0.144323	ns	0.915131	0.0139074	ns	unchanged
2359	D3ZQ02		Wdr37	4.10978e-05	-0.248325	FDR1%	0.206611	0.0900989	ns	less syn	0.987441	0.0421944	ns	0.0069356	0.14843	ns	unchanged
3788	F1MA42		Sez6	0.000820985	-0.247931	FDR1%	0.183423	0.0355717	ns	less syn	0.000409068	-0.228239	FDR1%	0.0992417	-0.114886	ns	less syn
1487	B2GV79;M0R416;Q8VD52	Pyridoxal phosphate phosphatase	Pdxp	0.0040238	-0.179406	ns	0.0254439	0.0655528	ns	unchanged	0.247604	0.0881017	ns	7.30041e-10	0.180827	FDR1%	less deg
388	A0A0G2JY26;D4A0I5		Dnajc6	7.79245e-08	-0.247927	FDR1%	0.0369375	0.0565417	ns	less syn	0.248407	0.0762463	ns	0.746569	0.0562607	ns	unchanged
87	A0A0A0MY31;C7E1V2;F1LNT1;P29994-7;P29994-5;P29994-3;P29994;F1LQX8;P29994-8;P29994-6;P29994-4;P29994-2	Inositol 1,4,5-trisphosphate receptor type 1	Itpr1	0.00894987	-0.447086	ns	0.570685	0.0500117	ns	unchanged	0.900825	-0.0458667	ns	0.52156	-0.171755	ns	unchanged
6015	Q5U300	Ubiquitin-like modifier-activating enzyme 1	Uba1	0.000999866	-0.130538	FDR1%	1.05292e-14	0.161336	FDR1%	slower turnover	0.273317	-0.0465136	ns	3.15918e-13	0.146293	FDR1%	less deg
5697	Q5BJT9;P25809;A0A0G2JVQ1;B0BNC0;P09605	Creatine kinase U-type, mitochondrial;Creatine kinase S-type, mitochondrial	Ckmt1b;Ckmt1;Ckmt2	0.000226778	-0.247716	FDR1%	0.0957646	-0.0370786	ns	less syn	3.54111e-05	-0.325826	FDR1%	0.0432583	-0.0399996	ns	less syn
3191	D4ADS9		Efr3a	2.98899e-05	-0.247648	FDR1%	0.23902	0.184333	ns	less syn	NA	NA	NA	NA	NA	NA	NA
790	A0A0G2K6T9;Q00A22		Pcdh1	2.75633e-08	-0.247394	FDR1%	0.435968	-0.0270765	ns	less syn	0.820081	-0.0097935	ns	0.023943	-0.0380911	ns	unchanged
6640	Q6P0K8;P70565	Junction plakoglobin	Jup	NA	NA	NA	NA	NA	NA	NA	0.00299206	-0.154084	ns	0.0131119	-0.111868	ns	unchanged
3968	G3V702;Q99M63	WD40 repeat-containing protein SMU1;WD40 repeat-containing protein SMU1, N-terminally processed	Smu1	3.20233e-06	-0.138995	FDR1%	4.61472e-06	0.161524	FDR1%	slower turnover	0.00407806	-0.0752962	ns	0.732788	-0.0252876	ns	unchanged
6134	Q5XIM7	Lysine--tRNA ligase	Kars	0.410544	-0.016114	ns	0.337908	0.074604	ns	unchanged	0.15918	-0.0645656	ns	0.00179368	-0.133226	ns	unchanged
5189	P84092;A0A140TAH5	AP-2 complex subunit mu	Ap2m1	3.2772e-05	-0.247257	FDR1%	0.27912	0.0235831	ns	less syn	0.139834	-0.127098	ns	0.000482139	0.0909949	FDR1%	less deg
5624	Q4VFZ4;B1WBN6;A0A0G2JX20	Katanin p80 WD40 repeat-containing subunit B1	Katnb1	0.922317	-0.0828872	ns	0.356932	0.125352	ns	unchanged	0.560115	0.040261	ns	0.00314977	0.181242	ns	unchanged
7046	Q9JJK4	Peroxisomal biogenesis factor 3	Pex3	0.00271989	-0.131118	FDR1%	0.00226546	0.161627	FDR1%	slower turnover	0.604259	-0.037484	ns	0.0526949	0.0809049	ns	unchanged
6907	Q8VH49	HIG1 domain family member 1A, mitochondrial	Higd1a	5.43054e-05	-0.247051	FDR1%	0.395547	-0.0956464	ns	less syn	4.98315e-06	-0.43534	FDR1%	0.00387213	-0.228743	ns	less syn
4346	M0RB22		Ptprd	0.00313163	-0.180363	ns	0.00147036	0.161678	FDR1%	less deg	0.000140738	-0.278819	FDR1%	0.378455	0.0229096	ns	less syn
3728	F1M7W0;D3ZCV9;D3ZBZ7;P54757-5;P54757-4;P54757-3;P54757-2;P54757	Receptor protein-tyrosine kinase;Ephrin type-A receptor 5	Epha5	1.04175e-05	-0.246668	FDR1%	0.0288938	0.2533	ns	less syn	1.19269e-07	-0.330902	FDR1%	0.0175531	-0.258869	ns	less syn
126	A0A0G2JSN5;Q62897;A0A0G2JSW5;Q62897-3;Q62897-2	Potassium voltage-gated channel subfamily D member 3	Kcnd3	0.0747962	-0.135933	ns	0.314537	0.124545	ns	unchanged	0.390707	-0.131619	ns	0.321719	-0.0551081	ns	unchanged
1078	A0A0H2UI09;Q9JM59;D5LL09;Q9JM59-3;Q9JM59-2	Kv channel-interacting protein 2	Kcnip2	0.0111375	-0.53269	ns	0.149928	-0.07127	ns	unchanged	0.407551	0.18657	ns	0.00631184	-0.211856	ns	unchanged
1025	A0A0H2UHF5;P49655	ATP-sensitive inward rectifier potassium channel 10	Kcnj10	0.213934	0.128321	ns	0.326148	-0.0349833	ns	unchanged	0.0480426	0.234593	ns	0.625788	-0.0705161	ns	unchanged
4189	G3V9M7;P52190	Inward rectifier potassium channel 4	Kcnj4	0.274236	-0.12927	ns	0.936707	0.0547487	ns	unchanged	NA	NA	NA	NA	NA	NA	NA
6658	Q6P6S0	Synaptosomal-associated protein 47	Snap47	7.06445e-05	-0.246364	FDR1%	0.101016	0.189708	ns	less syn	0.775715	-0.0500078	ns	0.343857	0.0827158	ns	unchanged
3030	D4A8N2		Fdx1l	0.000491506	-0.246363	FDR1%	0.483867	-0.063147	ns	less syn	NA	NA	NA	NA	NA	NA	NA
944	A0A0G2K9T1;Q5YB86		Itch	0.263144	-0.0548038	ns	0.0807292	0.145609	ns	unchanged	0.833044	0.0745465	ns	0.348911	0.0356349	ns	unchanged
1356	B0K031;P05426;B0K023;F1LUE9;Q7TP62	60S ribosomal protein L7	Rpl7;LOC367195	0.926713	-0.000729221	ns	6.02392e-09	0.163032	FDR1%	less deg	0.0990542	-0.0548118	ns	0.0205189	-0.0929894	ns	unchanged
3894	G3V667;Q924W2;Q924W3		Itga6	0.0192221	0.0567102	ns	0.540649	0.00716651	ns	unchanged	4.08111e-08	-0.297912	FDR1%	0.14613	-0.0824379	ns	less syn
2058	D3ZES7		Plxna4a	6.76881e-15	-0.245933	FDR1%	0.925785	0.026545	ns	less syn	4.56748e-09	-0.158288	FDR1%	0.762079	0.0422998	ns	less syn
3606	F1LZX9;A0A0G2JVZ6		Itgav	0.485471	-0.0330866	ns	0.0510221	0.0327043	ns	unchanged	0.84326	0.0279609	ns	0.537525	0.0256632	ns	unchanged
2533	D3ZV52		Itsn1	0.00392057	-0.271884	ns	0.068312	0.073846	ns	unchanged	0.596712	0.0248274	ns	0.192451	0.134197	ns	unchanged
5070	P62718;F1M0K6	60S ribosomal protein L18a	Rpl18a;RGD1565566	0.349254	-0.0163671	ns	1.84225e-08	0.163038	FDR1%	less deg	0.00473608	-0.144695	ns	0.0148413	-0.141546	ns	unchanged
5295	Q08163	Adenylyl cyclase-associated protein 1	Cap1	9.33471e-13	-0.245548	FDR1%	0.072492	0.0235022	ns	less syn	0.568442	0.0659074	ns	3.91163e-08	0.117215	FDR1%	less deg
523	F1M8F2;A0A0G2K0Q2;Q6QLM7	Kinesin-like protein;Kinesin heavy chain isoform 5A	Kif5a	0.0124775	-0.190876	ns	0.0209985	0.216977	ns	unchanged	0.576268	-0.0342757	ns	0.0726876	-0.182826	ns	unchanged
2406	D3ZRG7;D3ZRC3		Rbm26	0.0311249	-0.0883972	ns	0.00186704	0.16353	FDR1%	less deg	0.745418	-0.0453586	ns	0.807363	-0.0518962	ns	unchanged
166	A0A0G2JTD8;D4A6T9		Mark4	0.00174963	-0.245451	FDR1%	0.516293	0.0874247	ns	less syn	0.00930242	0.163089	ns	0.00187501	0.21359	ns	unchanged
4283	M0R7A6		Itsn2	0.958667	-0.116827	ns	0.622097	0.0747212	ns	unchanged	0.507788	0.00857954	ns	0.568703	-0.0376912	ns	unchanged
6191	Q62825	Exocyst complex component 3	Exoc3	0.0208301	-0.210253	ns	2.76731e-05	0.163939	FDR1%	less deg	0.827949	-0.0513417	ns	0.799744	-0.00899794	ns	unchanged
6766	Q75Q39;R9PXR4	Mitochondrial import receptor subunit TOM70	Tomm70a	1.92462e-06	-0.245151	FDR1%	0.0857181	0.0347731	ns	less syn	0.00330566	-0.124083	ns	0.174849	-0.0307267	ns	unchanged
3661	F1M3L7	Epidermal growth factor receptor kinase substrate 8	Eps8	0.0850754	-0.0821915	ns	0.629255	-0.016652	ns	unchanged	1.44806e-06	-0.28321	FDR1%	0.866076	0.00148303	ns	less syn
6366	Q66H79		Trim32	1.12673e-05	-0.179781	FDR1%	0.000599643	0.164108	FDR1%	slower turnover	0.000167183	-0.175363	FDR1%	0.0480534	0.074369	ns	less syn
5182	Q56R20;P83953	Importin subunit alpha;Importin subunit alpha-5;Importin subunit alpha-5, N-terminally processed	Kpna1	0.117009	-0.0999558	ns	0.0024302	0.220415	ns	unchanged	0.927552	0.0238866	ns	0.891813	0.0618672	ns	unchanged
4288	Q9Z0N9;Q6P6T9;M0R7I0	Importin subunit alpha	Kpna2;LOC100359600	0.602917	0.0519095	ns	0.16535	0.301969	ns	unchanged	0.211045	-0.0910527	ns	0.581465	0.118367	ns	unchanged
1857	D3Z8E6;A0A0G2K5T1	Calmodulin-regulated spectrin-associated protein 1	Camsap1	0.000663886	-0.24511	FDR1%	0.0296144	0.111914	ns	less syn	0.777258	-0.0380405	ns	0.925188	0.00186686	ns	unchanged
5671	Q56R17	Importin subunit alpha	Kpna4	0.00631107	-0.216087	ns	0.0641066	0.105339	ns	unchanged	0.942086	0.00447242	ns	0.00965892	0.163224	ns	unchanged
469	A0A0G2JZS1;Q56R15;Q3KR98;F1LT58	Importin subunit alpha	Kpna6	0.096315	-0.14238	ns	0.0387266	0.185132	ns	unchanged	0.0121339	-0.122334	ns	0.418549	0.112745	ns	unchanged
3478	F1LSG8;Q5BJX6;D3ZTE2		Ccdc132;LOC100911994	2.43759e-05	-0.244795	FDR1%	0.0850346	0.0762109	ns	less syn	0.452929	-0.0415829	ns	0.251935	0.0673324	ns	unchanged
1167	A0JN17;P08644-2;P08644	GTPase KRas;GTPase KRas, N-terminally processed	Kras	0.0669965	-0.129695	ns	0.775969	-0.0112838	ns	unchanged	0.000166723	-0.40323	FDR1%	3.07525e-05	0.100472	FDR1%	slower turnover
1188	A1A5R3	KRR1 small subunit processome component	Krr1	NA	NA	NA	NA	NA	NA	NA	0.987345	0.0476625	ns	0.944329	-0.0282723	ns	unchanged
3603	F1LZV1		Kalrn	NA	NA	NA	NA	NA	NA	NA	0.890553	-0.126085	ns	0.62371	-0.0804831	ns	unchanged
2915	D4A5J1		Kbtbd11	0.0353446	-0.169265	ns	0.00930559	0.0932617	ns	unchanged	0.51742	-0.0516458	ns	0.306581	0.126468	ns	unchanged
5366	Q32PY7;A0A0G2K226		Nudcd3	0.000201944	-0.243285	FDR1%	0.0047789	0.12368	ns	less syn	0.0592676	-0.0886835	ns	0.0191694	0.11226	ns	unchanged
5364	Q32PX9	Lactation elevated protein 1	Lace1	0.841807	-0.204314	ns	0.6092	-0.0105461	ns	unchanged	0.891216	-0.00242583	ns	0.262309	-0.0843524	ns	unchanged
521	A0A0G2K0P1;D3ZWA5		Kifap3	0.488561	-0.183638	ns	0.143815	0.227783	ns	unchanged	0.129299	0.258768	ns	0.531717	-0.0409331	ns	unchanged
287	A0A0G2JVW5;E9PSZ5;Q5RJQ1		Huwe1	2.06088e-06	-0.202701	FDR1%	3.59537e-09	0.164574	FDR1%	slower turnover	0.00017762	-0.151606	FDR1%	0.955302	0.0152527	ns	less syn
3748	F1M8H6;Q3MID5;Q5I6B8	Phosphatidylinositol 4-phosphate 5-kinase type-1 gamma	Pip5k1c	0.00075389	-0.242862	FDR1%	0.0214456	-0.0702277	ns	less syn	0.0239236	-0.118092	ns	0.0865814	0.0651764	ns	unchanged
2147	D3ZHL1		Ksr1	0.157834	-0.176343	ns	0.0187497	0.181932	ns	unchanged	0.206815	0.0617219	ns	4.28598e-07	0.32273	FDR1%	less deg
6670	Q6P791	Ragulator complex protein LAMTOR1	Lamtor1	0.0670527	-0.078915	ns	0.114497	0.146593	ns	unchanged	0.234087	0.0910491	ns	0.190415	0.0877998	ns	unchanged
6193	Q62844;A0A096MKC5;A0A0G2K2E3;A0A096MKC1	Tyrosine-protein kinase Fyn;Non-specific protein-tyrosine kinase	Fyn	0.284956	-0.00471732	ns	0.000130717	0.164589	FDR1%	less deg	0.449583	0.00291643	ns	0.0155016	0.106496	ns	unchanged
3906	G3V6C9;O54874;A0A0G2K5Z1	Non-specific serine/threonine protein kinase;Serine/threonine-protein kinase MRCK alpha	Cdc42bpa	1.034e-06	-0.275418	FDR1%	9.7161e-05	0.164626	FDR1%	slower turnover	0.256668	-0.0743589	ns	0.668541	0.0714525	ns	unchanged
1466	B2GV06	Succinyl-CoA:3-ketoacid coenzyme A transferase 1, mitochondrial	Oxct1	1.01995e-10	-0.242288	FDR1%	0.00524923	-0.030005	ns	less syn	4.63097e-23	-0.44255	FDR1%	1.32303e-05	-0.0812845	FDR1%	less syn & more deg
2554	D3ZVS2		L2hgdh	0.0070513	-0.128111	ns	0.544907	0.0272261	ns	unchanged	0.0488475	-0.14161	ns	0.226391	-0.0222727	ns	unchanged
5565	Q4QRB4	Tubulin beta-3 chain	Tubb3	0.0258881	-0.187771	ns	0.00954599	0.0694314	ns	unchanged	0.56668	-0.0462573	ns	6.11673e-10	0.17822	FDR1%	less deg
6996	Q9EQX9;G3V6M7	Ubiquitin-conjugating enzyme E2 N	Ube2n;Ube2t	0.00626299	-0.243757	ns	0.0430873	0.0476688	ns	unchanged	0.394323	-0.021667	ns	6.07481e-09	0.177986	FDR1%	less deg
6417	Q68FS4;Q68FS4-2	Cytosol aminopeptidase	Lap3	0.982674	-0.0119259	ns	0.0354245	0.0472127	ns	unchanged	0.535658	-0.0185781	ns	0.834651	0.0132629	ns	unchanged
2082	D3ZFJ6		Lactb	0.852946	0.0223522	ns	0.108554	-0.0102399	ns	unchanged	0.47175	-0.0390333	ns	0.727721	0.00601773	ns	unchanged
5642	Q561S0;A0A1W2Q6F8;Q6P6W6	NADH dehydrogenase [ubiquinone] 1 alpha subcomplex subunit 10, mitochondrial	Ndufa10	4.77159e-08	-0.242171	FDR1%	0.884715	0.034276	ns	less syn	0.00315363	-0.127914	ns	0.00462046	-0.0445001	ns	unchanged
2861	D4A465;A0A1B0GWT7		Lamtor2	0.221959	-0.0635003	ns	0.0490388	0.0753636	ns	unchanged	0.370967	0.0399152	ns	0.00398525	0.0749969	ns	unchanged
6691	Q6PCT3	Tumor protein D54	Tpd52l2	0.234613	-0.0196494	ns	8.29988e-05	0.164835	FDR1%	less deg	0.0827113	0.132691	ns	0.53186	0.0688398	ns	unchanged
5314	Q0VGK4;A0A0G2K080;A0A0G2K8E7	Glycerophosphodiester phosphodiesterase domain-containing protein 1	Gdpd1	0.0354634	-0.201321	ns	6.31104e-07	0.164907	FDR1%	less deg	0.330401	-0.0780342	ns	0.0476301	0.0280791	ns	unchanged
2062	D3ZF11		Lamtor5	0.470038	-0.0752009	ns	0.256164	0.0378684	ns	unchanged	0.445619	0.0050793	ns	0.678496	0.0613712	ns	unchanged
5525	Q4KLZ6	Bifunctional ATP-dependent dihydroxyacetone kinase/FAD-AMP lyase (cyclizing);ATP-dependent dihydroxyacetone kinase;FAD-AMP lyase (cyclizing)	Dak	0.0476114	-0.17097	ns	0.116415	0.0347714	ns	unchanged	0.578213	-0.00248552	ns	4.54666e-07	0.177502	FDR1%	less deg
3566	F1LX07;A0A0G2K2J7		Slc25a12	0.00173895	-0.241839	FDR1%	0.499012	0.01136	ns	less syn	3.78612e-06	-0.246669	FDR1%	0.610063	0.00880404	ns	less syn
2919	D4A5L9;P62898;CON__P62894;P10715	Cytochrome c, somatic;Cytochrome c, testis-specific	LOC679794;Cycs;Cyct	0.00115031	-0.241527	FDR1%	0.147656	-0.0443412	ns	less syn	5.99153e-05	-0.355813	FDR1%	0.922036	-0.00984449	ns	less syn
3995	G3V7A5;P35952	Low-density lipoprotein receptor	Ldlr	0.0124826	-0.213697	ns	0.0165077	0.243853	ns	unchanged	NA	NA	NA	NA	NA	NA	NA
3610	F1M062		Larp1	0.385374	-0.11208	ns	0.237397	0.162381	ns	unchanged	0.0326691	-0.098673	ns	0.226968	-0.0456739	ns	unchanged
4598	P08082;P08082-2	Clathrin light chain B	Cltb	0.296493	-0.100507	ns	0.900901	-0.0122403	ns	unchanged	0.00137667	-0.279757	FDR1%	0.608483	0.0290952	ns	less syn
2071	D3ZF45;A0A0G2K4I2		Larp4b	0.0300648	-0.138532	ns	0.00253281	0.17088	ns	unchanged	0.000184756	-0.208349	FDR1%	0.132419	-0.257734	ns	less syn
4665	P11762	Galectin-1	Lgals1	0.779839	0.0639611	ns	0.202737	0.0106777	ns	unchanged	0.1123	-0.119119	ns	0.0497866	-0.0977224	ns	unchanged
1657	B4F7A3	Galectin	Lgalsl	0.23179	-0.199507	ns	0.8632	-0.00635176	ns	unchanged	0.377274	0.00922194	ns	0.0578376	0.192969	ns	unchanged
4041	G3V7T6;Q9ET34;Q5FVK4		Sf3b1	0.000430903	-0.147355	FDR1%	0.000292951	0.164994	FDR1%	slower turnover	0.0660902	-0.0889851	ns	0.882314	-0.0679323	ns	unchanged
1079	A0A0H2UI10;Q8VIJ5;Q8VIJ5-3;Q8VIJ5-2	Protein O-GlcNAcase	Mgea5	0.00733076	-0.241129	ns	0.000474352	0.165041	FDR1%	less deg	0.000383534	0.223714	FDR1%	0.0198754	0.120436	ns	more syn
5873	Q5PPG2;Q9R0J8	Legumain	Lgmn	0.590479	0.127609	ns	0.542781	-0.0184218	ns	unchanged	0.634299	-0.1766	ns	0.0433965	0.18415	ns	unchanged
6308	Q641Y5	Ubiquitin-like modifier-activating enzyme ATG7	Atg7	0.426221	-0.133218	ns	5.56007e-05	0.165049	FDR1%	less deg	0.41081	-0.111051	ns	0.000333444	0.124446	FDR1%	less deg
59	A0A096MKE9;Q5U2M4	DNA ligase	Lig3	0.884446	-0.0844115	ns	0.0037305	0.528439	ns	unchanged	0.936358	-0.0480978	ns	0.444557	0.0681436	ns	unchanged
912	A0A0G2K9E5;D3Z9N3		Lars2	0.279115	-0.148539	ns	0.0503532	0.040428	ns	unchanged	0.000726801	0.216978	FDR1%	0.762888	-0.0167045	ns	more syn
7151	Q9Z0G8-2;Q9Z0G8	WAS/WASL-interacting protein family member 3	Wipf3	0.000616067	-0.24135	FDR1%	0.00350621	0.182746	ns	less syn	0.745463	0.0686659	ns	0.0245638	0.146684	ns	unchanged
5828	Q5M7U6	Actin-related protein 2	Actr2	3.89564e-06	-0.240806	FDR1%	0.828591	0.0216657	ns	less syn	0.0115139	-0.122888	ns	0.0338208	0.0503272	ns	unchanged
930	A0A0G2K9M4	Submitted name: WD repeat and FYVE domain-containing 3	Wdfy3	1.34039e-06	-0.208361	FDR1%	0.000925093	0.165306	FDR1%	slower turnover	0.000869199	0.105569	FDR1%	0.000292846	0.210583	FDR1%	more syn & less deg
6785	Q792I0	Protein lin-7 homolog C	Lin7c	0.0169208	-0.237067	ns	0.983929	-0.0121281	ns	unchanged	0.0204479	0.165831	ns	0.0304643	0.135205	ns	unchanged
2080	D3ZFF4		Lclat1	0.119627	-0.217815	ns	0.130941	0.139599	ns	unchanged	0.142868	-0.207269	ns	0.355259	0.0297851	ns	unchanged
6085	Q5XI90		Dynlt3	0.000397878	-0.239786	FDR1%	0.780211	0.0955174	ns	less syn	0.167154	-0.116439	ns	0.977669	0.035682	ns	unchanged
3918	G3V6I1;Q8K4K5	Lethal(2) giant larvae protein homolog 1	Llgl1	0.00657029	0.152528	ns	0.889048	0.0698166	ns	unchanged	0.641493	0.0568769	ns	0.330025	0.0875645	ns	unchanged
6202	Q62902;F1LRA1;A0A0G2JXC1	Protein ERGIC-53	Lman1	0.980531	0.0570081	ns	0.545231	0.0687634	ns	unchanged	0.014286	-0.165133	ns	0.832647	0.00628058	ns	unchanged
5531	Q4KM57		Lemd2	0.403605	-0.0313552	ns	0.00449634	0.248623	ns	unchanged	0.261795	-0.177381	ns	0.33163	-0.122805	ns	unchanged
1354	G3V996;B0K026		Letmd1	0.19846	-0.122335	ns	0.223365	-0.0335533	ns	unchanged	0.585435	-0.107329	ns	0.968624	-0.00386705	ns	unchanged
1717	B5DF14;F7ESR8		Lgi2	0.06774	0.125575	ns	0.0192734	0.287805	ns	unchanged	0.00226113	-0.709297	ns	0.0556825	-0.244911	ns	unchanged
3427	F1LR10		Lima1	0.410291	0.159546	ns	0.640705	0.113658	ns	unchanged	0.0681598	0.0912749	ns	0.511389	0.000370635	ns	unchanged
4044	G3V7U4;P70615	Lamin-B1	Lmnb1	0.0398101	-0.0854242	ns	0.227703	-0.0355407	ns	unchanged	0.857038	-0.00132326	ns	0.497431	0.0147845	ns	unchanged
6321	Q642B0		Gpc4	1.19465e-06	-0.239739	FDR1%	0.00589495	0.0936159	ns	less syn	3.66694e-18	-0.646484	FDR1%	0.289391	-0.0458442	ns	less syn
2926	D4A5W8		Pgs1	0.00248211	-0.239327	FDR1%	0.774087	0.00927251	ns	less syn	0.070658	-0.0825685	ns	0.301408	-0.0266496	ns	unchanged
6238	Q63362	NADH dehydrogenase [ubiquinone] 1 alpha subcomplex subunit 5	Ndufa5	7.14919e-05	-0.23931	FDR1%	0.363664	0.00994424	ns	less syn	0.00132728	-0.205324	FDR1%	0.00391294	-0.0742866	ns	less syn
4471	O55173	3-phosphoinositide-dependent protein kinase 1	Pdpk1	0.000181086	-0.239282	FDR1%	0.00593847	0.139098	ns	less syn	0.366187	0.0486652	ns	0.00066932	0.12446	FDR1%	less deg
6701	Q6PDW1;D3ZHB3;P63324;D3ZV36;D3ZG05	40S ribosomal protein S12	LOC100359593;LOC100360573;Rps12;RGD1561102;LOC100912049	0.766427	-0.0427944	ns	0.584072	0.0239137	ns	unchanged	0.0439945	-0.149254	ns	2.45293e-07	-0.207524	FDR1%	more deg
6096	Q5XIC6		Psmd12	0.0422674	-0.107694	ns	7.90135e-13	0.165429	FDR1%	less deg	0.404556	-0.00299448	ns	0.279766	0.0490931	ns	unchanged
5516	Q4KLJ0;P18437	Non-histone chromosomal protein HMG-17	LOC100360316;Hmgn2	0.488564	0.00216778	ns	0.469104	0.0193402	ns	unchanged	0.00942304	0.13651	ns	0.328783	0.170117	ns	unchanged
5273	Q05096;Q05096-3;Q05096-2	Unconventional myosin-Ib	Myo1b	0.107259	-0.128437	ns	0.00153254	0.166399	FDR1%	less deg	9.35922e-05	0.331253	FDR1%	0.218743	0.0362663	ns	more syn
3853	F7F3Z1		Lman2l	0.0734747	-0.129238	ns	0.23463	0.194833	ns	unchanged	0.502348	0.00789817	ns	0.51876	0.0564916	ns	unchanged
5085	Q5BJN7;P62864	40S ribosomal protein S30	LOC100360647;Fau	0.183548	-0.0849184	ns	0.368002	-0.0742764	ns	unchanged	0.04698	-0.118544	ns	0.00019385	-0.244159	FDR1%	more deg
2516	D3ZUP8		Lmbrd2	0.481932	-0.178225	ns	0.10808	0.073101	ns	unchanged	0.997004	-0.0473899	ns	0.0613916	0.152825	ns	unchanged
1129	A0A140TAI6;D3ZZ95;F1M706;D3ZJJ6;D4A1Q0;P39032;A0A0G2K6X1;A0A0G2JUV9	60S ribosomal protein L36	LOC100361060;LOC100360439;LOC100359616;LOC100361644;Rpl36	0.177823	-0.0507403	ns	0.045246	0.119075	ns	unchanged	0.412859	0.0480126	ns	0.815457	-0.120047	ns	unchanged
2260	D3ZLC1		Lmnb2	0.547222	-0.0959048	ns	0.0450607	-0.0476657	ns	unchanged	0.451075	-0.0204757	ns	0.363164	0.0404489	ns	unchanged
4749	P19511	ATP synthase F(0) complex subunit B1, mitochondrial	Atp5f1	0.00197681	-0.239206	FDR1%	0.231182	0.00296613	ns	less syn	0.0145393	-0.153961	ns	0.00761607	-0.0391928	ns	unchanged
1169	A0JN29		Lnp	0.0250277	-0.155631	ns	0.590766	-0.00703374	ns	unchanged	0.0138663	-0.187424	ns	0.0365473	0.0811631	ns	unchanged
4225	M0R3M4;D4A054		Ranbp2	3.58631e-09	-0.121146	FDR1%	1.59417e-08	0.166425	FDR1%	slower turnover	0.000719173	-0.0656742	FDR1%	0.211138	-0.0629267	ns	less syn
7000	Q9ER34	Aconitate hydratase, mitochondrial	Aco2	7.30594e-12	-0.238964	FDR1%	0.00607984	-0.0431698	ns	less syn	1.07584e-08	-0.18624	FDR1%	1.53885e-09	-0.0755345	FDR1%	less syn & more deg
1492	B2GV92;P83868;Q5PQL9	Prostaglandin E synthase 3	Ptges3;Ptges3l1	0.0016583	-0.166301	FDR1%	2.05097e-05	0.166539	FDR1%	slower turnover	0.0983062	-0.0443836	ns	0.134178	0.00284915	ns	unchanged
3089	D4AAM0;A0A0G2K8P2		Tnpo3	0.592809	-0.0708279	ns	0.00022093	0.166673	FDR1%	less deg	0.51535	0.0136522	ns	0.0154795	0.0881547	ns	unchanged
1061	A0A0H2UHT6;D3ZM33;P62271;M0R5K9;A0A0G2KA79;D3ZAU6;D4AA93	40S ribosomal protein S18	LOC100362298;Rps18;LOC100912024;RGD1561919;RGD1565912	0.838291	-0.0318538	ns	0.139421	0.020695	ns	unchanged	0.00833568	-0.0678102	ns	2.90353e-09	-0.193921	FDR1%	more deg
2943	D4A6G6;P17074;A0A0H2UI38;F1M8C7;F1M764;D3ZGN8;F1LYF3;D3ZUD7;D3ZSH6	40S ribosomal protein S19	LOC100362339;Rps19;Rps19l1;LOC687298;LOC100360843	0.202157	-0.0418233	ns	0.52683	-0.00304662	ns	unchanged	0.000153244	-0.174374	FDR1%	6.86371e-12	-0.255427	FDR1%	less syn & more deg
6077	Q5XI73	Rho GDP-dissociation inhibitor 1	Arhgdia	0.0684703	-0.088626	ns	0.931663	0.0114065	ns	unchanged	0.152487	-0.102982	ns	1.39207e-08	0.176358	FDR1%	less deg
733	A0A0G2K5C6;G3V7U2;Q63330		Map1a	0.00157161	-0.23862	FDR1%	0.580737	0.0223331	ns	less syn	0.953474	0.0345919	ns	0.946068	-0.00430107	ns	unchanged
4770	P21531;A0A0U1RRY5	60S ribosomal protein L3	Rpl3	0.454938	-0.00560969	ns	4.2069e-11	0.167364	FDR1%	less deg	0.00678407	-0.0953326	ns	0.0432753	-0.0952787	ns	unchanged
3288	F1LM09;Q4VSI4	Ubiquitin carboxyl-terminal hydrolase;Ubiquitin carboxyl-terminal hydrolase 7	Usp7	0.0602677	-0.133742	ns	3.45778e-05	0.167392	FDR1%	less deg	0.00707232	-0.138494	ns	0.00940887	0.0873666	ns	unchanged
2350	Q6PDW2;D3ZPN7;D3ZZH9;M0R5R7;D4A870;D3ZPH0;D3ZMI8;D3Z9G3;F1LWH4;D3ZRA9;D3ZLH3;D3ZEK2;D4A7B4;D4A219;D3ZHP4;M0RAP0;M0RCS9;D3ZCN5;D4A4G7;D3ZIM9;D4A9T8		LOC100360604;LOC681195;LOC686080;RGD1565370;RGD1562839;LOC100361103;RGD1560414;RGD1562601;RGD1562923;LOC100360611;RGD1565159;RGD1561875;RGD1565555;RGD1566270;RGD1564552	0.725774	-0.0222335	ns	0.0447524	0.153755	ns	unchanged	0.0232243	-0.150986	ns	0.106708	-0.14223	ns	unchanged
1051	A0A0H2UHQ8;D3ZFA8;P04644;D3ZHU9;D3ZKG6;D3ZM01;M0R8M8;F1M5B1	40S ribosomal protein S17	LOC100364909;Rps17;LOC100361180;RGD1559955;RGD1562381;LOC100365961;LOC102554167	0.756594	-0.00334361	ns	0.0338672	0.086336	ns	unchanged	0.271378	-0.0522438	ns	0.00239475	-0.162119	ns	unchanged
6524	Q6AYG3	Protein prune homolog	Prune	0.35589	-0.116995	ns	0.0023056	0.125572	ns	unchanged	0.484629	-0.0423598	ns	9.85064e-05	0.174113	FDR1%	less deg
3350	F1LNT0;Q62951	Dihydropyrimidinase-related protein 4	Dpysl4	0.00436172	-0.120786	ns	0.505027	-0.0103463	ns	unchanged	0.402297	-0.0131261	ns	3.88392e-23	0.173668	FDR1%	less deg
4827	P29534;A0A0G2K127	Vascular cell adhesion protein 1	Vcam1	9.00235e-05	-0.238253	FDR1%	0.968459	-0.085178	ns	less syn	1.1035e-07	-0.424483	FDR1%	0.0126148	-0.164569	ns	less syn
3838	F7EN52;A0A0G2JWG7		Cyp46a1	1.79568e-20	-0.341232	FDR1%	0.000311216	0.168088	FDR1%	slower turnover	9.41145e-07	-0.208368	FDR1%	0.965289	-0.052728	ns	less syn
3215	D4AEC2;A0A0G2K7K9		Camsap2	2.72429e-06	-0.238001	FDR1%	0.0948638	0.141745	ns	less syn	0.0160043	-0.19275	ns	0.553545	-0.0773345	ns	unchanged
81	A0A0A0MY00;P70584	Short/branched chain specific acyl-CoA dehydrogenase, mitochondrial	Acadsb	0.0055882	-0.237919	ns	0.505667	0.0123376	ns	unchanged	0.000603689	-0.275389	FDR1%	0.0218116	-0.0468685	ns	less syn
2057	D3ZES2		Trappc6b	0.0717906	-0.176193	ns	0.0018836	0.168342	FDR1%	less deg	0.510283	-0.113246	ns	0.0775051	0.0587406	ns	unchanged
2098	D3ZG07		LOC100360750	0.935499	-0.100056	ns	0.499974	-0.0285665	ns	unchanged	0.953933	-0.0705053	ns	0.629661	0.0188612	ns	unchanged
2876	D4A4P3;M0RA24		LOC100361144;LOC100362391	0.0303479	-0.192878	ns	0.422521	0.00148856	ns	unchanged	0.0753597	-0.178031	ns	0.0010364	-0.0584841	FDR1%	more deg
1978	D3ZYN2;D3ZCG2;D3ZSN6;D3ZJJ7;D4A1V5;D4ADI4	Kinesin-like protein	Kif21a	9.12391e-07	-0.237719	FDR1%	0.00438034	0.0969993	ns	less syn	0.113701	-0.0997817	ns	0.00507101	0.0990194	ns	unchanged
2432	D3ZSP1;D4A8M5;Q6QI63;F7ETL6		LOC100361838;Snrpep2;Zfp341	0.184824	-0.107728	ns	0.959408	0.010791	ns	unchanged	0.246655	-0.043987	ns	0.00440953	-0.115112	ns	unchanged
1688	B5DEL7		LOC100363239	0.373186	-0.0513	ns	0.00397075	0.283224	ns	unchanged	0.00359948	-0.0986574	ns	0.470665	0.0028221	ns	unchanged
3063	D4A9P7		LOC100363408	0.895492	-0.0880691	ns	0.0283758	0.131336	ns	unchanged	0.0926794	0.192587	ns	0.00161567	0.223747	ns	unchanged
6678	Q6P7Q4	Lactoylglutathione lyase	Glo1	7.12912e-05	-0.23766	FDR1%	0.166418	0.0647434	ns	less syn	0.343821	-0.0314863	ns	2.98484e-09	0.171153	FDR1%	less deg
4422	O35264	Platelet-activating factor acetylhydrolase IB subunit beta	Pafah1b2	0.0182995	-0.138123	ns	0.00872189	0.16476	ns	unchanged	0.898751	0.0226627	ns	0.00036008	0.173521	FDR1%	less deg
5492	Q4G008	Uncharacterized protein KIAA0930 homolog	unknown	0.165232	-0.0545255	ns	0.0678719	0.0456587	ns	unchanged	0.322966	-0.104707	ns	0.000960055	0.173356	FDR1%	less deg
3799	F1MAA3;Q499R1		LOC100909464;Ppp2r5d	0.0139303	-0.108644	ns	0.247648	0.0639599	ns	unchanged	0.000189924	0.159628	FDR1%	9.43361e-10	0.231426	FDR1%	more syn & less deg
3843	Q4KM69;F7EUU4	Myosin XVIIIa	Cops5	0.0310008	-0.119218	ns	0.00114302	0.168345	FDR1%	less deg	0.769901	-0.0119931	ns	0.0240209	0.113341	ns	unchanged
4582	P07323	Gamma-enolase	Eno2	9.50434e-08	-0.237655	FDR1%	0.0779984	0.0243715	ns	less syn	0.814487	-0.0421557	ns	6.48369e-07	0.16366	FDR1%	less deg
4309	M0R8V0		LOC100910056	0.310648	-0.064341	ns	0.00261136	0.0718974	ns	unchanged	0.000207254	-0.262935	FDR1%	0.253725	0.104239	ns	less syn
2645	D3ZY71		LOC100910137	0.0676168	-0.144468	ns	0.0585898	-0.125739	ns	unchanged	0.0336239	-0.206287	ns	0.0201329	-0.0811859	ns	unchanged
4099	G3V8G2;B2RYP1		Psmd5	0.0866668	-0.0261139	ns	0.00112037	0.168771	FDR1%	less deg	0.265321	0.00712613	ns	0.396539	0.0653353	ns	unchanged
4379	M0RDM7		LOC100910143	0.264424	-0.255019	ns	0.146324	0.111258	ns	unchanged	0.00236717	-0.294373	ns	0.972964	-0.0621162	ns	unchanged
2324	M0RC60;D3ZNV6		LOC100910164;Elmod2	0.521016	0.0305483	ns	0.101616	0.189748	ns	unchanged	0.0715635	-0.0927965	ns	0.948563	-0.0219708	ns	unchanged
6730	Q6TUG0	DnaJ homolog subfamily B member 11	Dnajb11	0.239178	-0.0854816	ns	0.0414508	0.130038	ns	unchanged	9.68573e-05	-0.273696	FDR1%	0.0548416	-0.10566	ns	less syn
1997	D3ZCZ9;P52504	NADH dehydrogenase [ubiquinone] iron-sulfur protein 6, mitochondrial	LOC100912599;Ndufs6	0.00653978	-0.205514	ns	0.34039	0.0353373	ns	unchanged	0.00525536	-0.138125	ns	0.00464216	-0.0487026	ns	unchanged
3281	E9PU28;Q6P9U9	Inosine-5-monophosphate dehydrogenase 2;Inosine-5-monophosphate dehydrogenase	Impdh2	0.479834	-0.0863462	ns	0.156405	0.218394	ns	unchanged	0.0673899	0.169047	ns	9.60526e-05	0.17298	FDR1%	less deg
4364	M0RCJ9;Q7TPB7		LOC100911027;Mal2	0.0103103	-0.194336	ns	0.280457	0.0752112	ns	unchanged	0.0951466	-0.211004	ns	0.121315	0.107818	ns	unchanged
3067	D4A9V7		LOC100911305	0.527059	-0.279046	ns	0.522113	0.0471209	ns	unchanged	0.0121941	-0.481905	ns	0.894303	-0.103468	ns	unchanged
6622	Q6MG49;A0A0G2K7C1;Q6MG49-2	Large proline-rich protein BAG6	Bag6	0.592743	-0.0153711	ns	2.01221e-05	0.16894	FDR1%	less deg	0.37465	0.0405697	ns	0.0506808	0.0410097	ns	unchanged
395	A0A0G2JY69;G3V907		LOC100911356	0.00516604	-0.151841	ns	0.932661	-0.0186708	ns	unchanged	0.364742	0.0901472	ns	0.919464	0.0410562	ns	unchanged
2546	D3ZVI9		LOC100911365	0.597219	-0.0654295	ns	0.394726	-0.012542	ns	unchanged	0.197881	-0.11986	ns	0.859546	-0.0325097	ns	unchanged
6769	Q761X5;A0A0G2JTK0;F1LM73;F1LNE2;O08722	Netrin receptor UNC5C;Netrin receptor UNC5B	Unc5c;Unc5b	7.38101e-05	-0.237649	FDR1%	0.260115	0.101699	ns	less syn	4.12283e-10	-0.36734	FDR1%	0.890889	-0.0129579	ns	less syn
2027	D3ZE15;F1LZC5		LOC100911483;Ndufa13	0.0120577	-0.228713	ns	0.387648	-0.00811694	ns	unchanged	0.0967105	-0.16052	ns	0.306407	-0.0737793	ns	unchanged
3879	G3V614;Q4G074	KIF1-binding protein	LOC606294;Kbp	NA	NA	NA	NA	NA	NA	NA	0.0990209	0.134813	ns	0.223909	-0.0633626	ns	unchanged
6350	Q66H12	Alpha-N-acetylgalactosaminidase	Naga	0.0792339	0.111163	ns	0.154133	0.107324	ns	unchanged	0.959504	0.00251798	ns	0.000290717	0.171961	FDR1%	less deg
3533	F1LV89;Q5EB70		Rap1gap	1.32088e-10	-0.251264	FDR1%	6.99292e-05	0.168975	FDR1%	slower turnover	1.68713e-08	-0.215654	FDR1%	0.731268	-0.00595772	ns	less syn
1242	M0RDM4;Q6I8Q6;M0RCL5;K7R8M0;G3V9C0;D3ZVK7;A9UMV8;Q64598;Q4FZT6;Q00728;P0C170;P0C169;D4ACV3;K7S2S2;P0CC09;P02262	Histone H2A;Histone H2A.J;Histone H2A type 1-F;Histone H2A type 3;Histone H2A type 4;Histone H2A type 1-E;Histone H2A type 1-C;Histone H2A type 2-A;Histone H2A type 1	LOC680322;Hist1h2af;LOC100910554;Hist1h2ao;Hist1h2ac;Hist1h2ak;H2afj;Hist2h2ac;Hist2h2aa2;Hist2h2aa3	0.218998	-0.10071	ns	0.913541	-0.0196166	ns	unchanged	0.759125	-0.0417757	ns	0.691769	0.0687764	ns	unchanged
4323	M0R9Q1;M0R3R6;Q920B2		LOC100911677;Rbm14	0.0799801	-0.0862645	ns	0.107586	0.00120159	ns	unchanged	0.634441	-0.0912837	ns	0.728212	0.0162754	ns	unchanged
1697	B5DEP7;A0A0G2K3V8		LOC100911683	0.574446	-0.127148	ns	0.56737	-0.0166669	ns	unchanged	0.246892	-0.145505	ns	0.147133	-0.0928585	ns	unchanged
723	A0A0G2K543;D4A5B3		C2cd5	0.00179333	-0.237576	FDR1%	0.0121013	0.106905	ns	less syn	0.218429	-0.0898927	ns	0.0786979	0.102083	ns	unchanged
2064	D3ZF13	Acyl carrier protein	LOC683884	0.213841	-0.156237	ns	0.812095	-0.0234209	ns	unchanged	0.200405	-0.0759531	ns	0.660282	-0.0558421	ns	unchanged
4368	M0RCY2;P62278;Q7TP70;F1LMB4	40S ribosomal protein S13	LOC683961;Rps13;Bco2;Tex12	0.535914	0.0184454	ns	0.00328306	0.0888643	ns	unchanged	0.236153	-0.0711316	ns	0.000144113	-0.138347	FDR1%	more deg
4337	M0RAK2	Fibronectin type III and SPRY domain-containing 1-like	LOC684270	0.820636	0.0517941	ns	0.153619	0.0163837	ns	unchanged	0.166904	-0.109746	ns	0.402446	0.0282171	ns	unchanged
5334	Q1RP74;Q1W1V7		LOC100911774;Tbcb	0.0549471	-0.128644	ns	0.0312642	0.107682	ns	unchanged	0.320303	-0.0638859	ns	0.307588	0.112448	ns	unchanged
1561	B2RYS2	Cytochrome b-c1 complex subunit 7	LOC685596	0.00754728	-0.297049	ns	0.987642	0.0123096	ns	unchanged	0.15023	-0.139078	ns	0.677688	-0.0316882	ns	unchanged
25	A0A096MJL2;A0A096MJC9		LOC100911918	0.189475	-0.272527	ns	0.189386	0.0824388	ns	unchanged	0.956831	-0.00951173	ns	0.0295408	0.274024	ns	unchanged
5409	Q3MHS7		Gmds	0.183048	0.0815092	ns	0.000369803	0.169244	FDR1%	less deg	0.00188476	0.152475	FDR1%	9.48977e-05	0.128769	FDR1%	more syn & less deg
2097	D3ZFY8;F1M227		LOC100912618	0.0307352	-0.245596	ns	0.953958	0.127364	ns	unchanged	0.882866	0.018878	ns	0.0445004	0.196187	ns	unchanged
2127	D3ZH14;D3ZLH7		LOC100912698;Tmcc1	0.92866	-0.121995	ns	0.165679	0.110581	ns	unchanged	0.0487944	-0.0753165	ns	0.404139	0.00146875	ns	unchanged
183	A0A0G2JTN4;D4AB17		LOC100912917	0.527959	-0.0245679	ns	0.161163	0.0710327	ns	unchanged	0.454628	-0.0366148	ns	0.00148068	0.0684988	FDR1%	less deg
6945	Q924S5	Lon protease homolog, mitochondrial	Lonp1	0.543262	-0.00926931	ns	0.0090446	0.0652252	ns	unchanged	0.0416307	-0.114478	ns	0.878092	-0.0113274	ns	unchanged
1445	B2GUU4;Q3MIB4;Q6TXI3;F7FF30	Lon protease homolog 2, peroxisomal	Lonp2	0.840594	0.00442214	ns	0.010174	0.316606	ns	unchanged	0.0692168	0.169085	ns	0.459429	0.0921657	ns	unchanged
2648	D3ZYH3		LOC100912928	0.397384	-0.0394371	ns	0.641315	0.0495203	ns	unchanged	0.526211	0.32122	ns	0.761925	0.151185	ns	unchanged
5769	Q5FVN0	Lysophospholipid acyltransferase 5	Lpcat3	0.812145	-0.121045	ns	0.543924	0.147646	ns	unchanged	0.619156	-0.0900835	ns	0.287248	-0.0464811	ns	unchanged
4900	P42346;A0A0G2JX74	Serine/threonine-protein kinase mTOR	Mtor	0.0653495	-0.100827	ns	4.5026e-07	0.169792	FDR1%	less deg	0.00384304	0.121283	ns	0.0203638	0.0722424	ns	unchanged
550	M0RBI3;D4A5Y6;B5DFB7;A0A0G2K1A0		LOC102553099;Naa50	0.149893	-0.0933432	ns	0.00559086	0.25119	ns	unchanged	0.855082	-0.0415695	ns	0.946613	-0.0629172	ns	unchanged
7159	Q9Z173-2;Q9Z173-3;D4AAL4;Q9Z173-5;Q9Z173-7;Q9Z173-4;Q9Z173-6;Q9Z173;D3ZH59;F1LRG7	Latrophilin-3	Lphn3;Adgrl3	0.0485404	0.0811471	ns	0.285022	0.0836755	ns	unchanged	0.0134604	-0.103372	ns	0.480576	0.00304577	ns	unchanged
6101	Q5XIE1	Protein THEM6	Them6	1.01191e-06	-0.236944	FDR1%	0.021695	0.168231	ns	less syn	2.71078e-05	-0.367946	FDR1%	0.920069	-0.0202539	ns	less syn
1753	B5DFE0;A0A0G2K4N7		Mpp6	1.10953e-06	-0.23678	FDR1%	0.55437	0.0251037	ns	less syn	0.0569348	0.119987	ns	1.39629e-13	0.157486	FDR1%	less deg
1628	B3DM92;Q7TMB0	Lipid phosphate phosphatase-related protein type 3	Lppr3	0.267612	-0.22085	ns	0.529914	0.0262257	ns	unchanged	NA	NA	NA	NA	NA	NA	NA
1138	A0A146J2K6;A0A096MJG7;F1LVX3		LOC102554591	0.387338	-0.104341	ns	0.515018	-0.008663	ns	unchanged	0.482349	-0.0395403	ns	0.962595	0.0164828	ns	unchanged
4629	P0C7J6;D4A5B8	Leucine-rich repeat and fibronectin type III domain-containing protein 1	Lrfn1	0.132193	-0.0814243	ns	0.325962	0.0909953	ns	unchanged	0.389858	-0.0323288	ns	0.437634	0.0126106	ns	unchanged
4017	G3V7J3;Q460M5	Leucine-rich repeat and fibronectin type-III domain-containing protein 2	Lrfn2	NA	NA	NA	NA	NA	NA	NA	0.326299	0.174191	ns	0.143511	0.0974868	ns	unchanged
3128	D4ABX8	Leucine-rich repeat and fibronectin type-III domain-containing protein 4	Lrfn4	0.0890824	-0.19807	ns	0.338817	0.0471005	ns	unchanged	0.272471	-0.0769921	ns	0.536324	0.0720038	ns	unchanged
720	A0A0G2K532;D4A1J9	Leucine-rich repeat and fibronectin type-III domain-containing protein 5	Lrfn5	0.457873	-0.149071	ns	0.0537105	0.113714	ns	unchanged	0.00277586	-0.205494	ns	0.626491	0.0734859	ns	unchanged
3737	F1M836;A0A0G2JU56;Q8VHF0;A0A1B0GWN5	MAP/microtubule affinity-regulating kinase 3	Mark3	3.25207e-05	-0.236651	FDR1%	0.0630782	0.170077	ns	less syn	0.0651394	-0.10052	ns	0.519008	-0.0267281	ns	unchanged
6949	Q99068	Alpha-2-macroglobulin receptor-associated protein	Lrpap1	0.211979	-0.0898678	ns	0.283028	-0.0253645	ns	unchanged	4.84014e-07	0.362319	FDR1%	0.0406622	-0.0174798	ns	more syn
5715	Q6F6B2;Q5BK33		LOC652956	0.415027	-0.0912857	ns	0.760061	0.0242944	ns	unchanged	0.713339	0.0179234	ns	0.000136483	0.156319	FDR1%	less deg
3630	F1M1A6		LOC681355	NA	NA	NA	NA	NA	NA	NA	0.831496	-0.753773	ns	0.669016	0.0367147	ns	unchanged
355	A0A0G2JXD0;Q6P9U5;P17077;A0A0G2JX41;F1M7A9;M0R6B4	60S ribosomal protein L9	Rpl9;RGD1561928;LOC100910002	0.70946	-0.00987869	ns	1.50938e-08	0.169882	FDR1%	less deg	0.297615	-0.0336465	ns	0.0923284	-0.112779	ns	unchanged
1308	F1M8Y2;F1M9I6;B3STU1;B0BNE7	Tetraspanin	Tspan7	1.41661e-05	-0.236545	FDR1%	0.705542	0.00149197	ns	less syn	0.329092	0.00826803	ns	0.67597	0.0488187	ns	unchanged
5753	Q5FVI3;F8WFF9;A0A0G2KBC0	Leucine-rich repeat-containing protein 57	Lrrc57	0.35183	-0.171852	ns	0.303498	-0.0320983	ns	unchanged	0.426865	0.0196994	ns	0.0797631	0.068188	ns	unchanged
6010	Q5U2X6	Coiled-coil domain-containing protein 47	Ccdc47	0.0276582	-0.197644	ns	0.00141052	0.169915	FDR1%	less deg	0.43489	-0.0698545	ns	0.261314	-0.036821	ns	unchanged
3575	F1LXQ7		Arhgap21	5.05416e-06	-0.23607	FDR1%	0.553502	-0.00794309	ns	less syn	0.00361276	0.110735	ns	0.000282921	0.141402	FDR1%	less deg
5674	Q587K4	Leucine-rich repeat-containing protein 73	Lrrc73	0.153013	-0.185987	ns	0.0312368	0.194027	ns	unchanged	NA	NA	NA	NA	NA	NA	NA
5615	Q4V8I7	Volume-regulated anion channel subunit LRRC8A	Lrrc8a	0.992869	0.0128566	ns	0.0694561	0.10827	ns	unchanged	0.0199343	-0.122548	ns	0.168022	0.0382441	ns	unchanged
4284	M0R7B4		LOC684828	0.527235	-0.0539714	ns	0.699538	-0.017939	ns	unchanged	0.113907	-0.11233	ns	0.784248	0.0800931	ns	unchanged
6018	Q5U308;A0A0H2UHA3	Volume-regulated anion channel subunit LRRC8D	Lrrc8d	0.548565	-0.0454227	ns	0.0345918	0.100311	ns	unchanged	0.021429	-0.229795	ns	0.441125	0.0192651	ns	unchanged
5583	Q4V7E8	Leucine-rich repeat flightless-interacting protein 2	Lrrfip2	0.1169	0.160846	ns	0.456026	0.0596364	ns	unchanged	0.234348	-0.0557728	ns	0.29032	0.109494	ns	unchanged
5370	Q32Q07	Leucine-rich repeat neuronal protein 1	Lrrn1	0.0150625	-0.362635	ns	0.104724	0.112329	ns	unchanged	0.0573175	0.179303	ns	0.151292	0.0724171	ns	unchanged
2400	D3ZRB3		LOC687609	0.394394	-0.25043	ns	0.752356	0.0960528	ns	unchanged	0.00925124	0.217421	ns	0.387844	0.123521	ns	unchanged
1971	D3ZC82;M0R4K6		LOC687994;RGD1564405	0.0263235	-0.145945	ns	0.954111	0.0804916	ns	unchanged	0.0603273	-0.108522	ns	0.312969	-0.154316	ns	unchanged
3375	F1LPG5;F1M7T1;Q2XTA8;D3ZV29;D3ZQH7;F1M7Z4		LOC688963;LOC100361934;Ndufb4;Ndufb4l1;RGD1560088;LOC687864	0.00873532	-0.264511	ns	0.275567	0.0366673	ns	unchanged	0.1997	-0.148043	ns	0.0332658	-0.0196801	ns	unchanged
2688	D3ZZG3		LOC691921	NA	NA	NA	NA	NA	NA	NA	0.453648	-0.0439467	ns	0.569424	-0.0454041	ns	unchanged
1372	B1H257		Loh12cr1	0.103004	-0.1733	ns	0.678832	0.0218353	ns	unchanged	0.821406	0.00957844	ns	0.91112	0.0111367	ns	unchanged
4532	P00507	Aspartate aminotransferase, mitochondrial	Got2	4.76514e-06	-0.235861	FDR1%	0.0392567	-0.0152049	ns	less syn	1.53784e-07	-0.297532	FDR1%	0.00489689	-0.000310888	ns	less syn
5149	P69682	Adaptin ear-binding coat-associated protein 1	Necap1	6.91942e-05	-0.235699	FDR1%	0.507114	-0.0354221	ns	less syn	0.0570484	-0.133979	ns	0.350912	0.0887763	ns	unchanged
948	A0A0G2K9V6;Q5XHY5	Threonine--tRNA ligase, cytoplasmic	Tars	0.079853	-0.086842	ns	6.38893e-06	0.170625	FDR1%	less deg	0.864589	-0.0335947	ns	0.197683	0.0859507	ns	unchanged
6331	Q64361	Latexin	Lxn	0.164586	0.128683	ns	0.169596	-0.0497946	ns	unchanged	0.0115815	0.141829	ns	0.450624	0.0498567	ns	unchanged
6086	Q5XI97	Alanyl-tRNA editing protein Aarsd1	Aarsd1	0.06008	-0.0828259	ns	0.23859	0.117644	ns	unchanged	9.25174e-05	-0.270463	FDR1%	0.888202	-0.0309613	ns	less syn
684	B0BN52;A0A0G2K459;A0A0G2K7P7		Mtch2	0.000362217	-0.235684	FDR1%	0.946737	0.0177605	ns	less syn	0.00820077	-0.251219	ns	0.863766	-0.00379334	ns	unchanged
4254	M0R5P8;F1M542		Adam22	2.02461e-07	-0.235541	FDR1%	0.314723	0.0553755	ns	less syn	0.00564105	-0.15481	ns	0.313537	0.0565315	ns	unchanged
3443	F1LRF3;A0A0G2K5H2;A6JFQ6	Clavesin-1	Clvs1	0.704078	0.0022228	ns	0.00151905	0.17075	FDR1%	less deg	0.0878747	-0.242288	ns	0.0122198	-0.153646	ns	unchanged
814	A0A0G2K777;A1L1L6	Mitochondrial Rho GTPase	Rhot1	8.54609e-07	-0.235411	FDR1%	0.674322	0.0308129	ns	less syn	0.00371492	-0.158855	ns	0.0759433	0.0811397	ns	unchanged
1573	G3V950;B2RYU8	LYR motif-containing protein 1	Lyrm1	0.318917	-0.119746	ns	0.167853	0.0576819	ns	unchanged	0.692648	-0.064995	ns	0.592724	0.0183917	ns	unchanged
361	F1M0N7;A0A0G2JXG7		Lrrc16a	NA	NA	NA	NA	NA	NA	NA	0.738782	-0.054993	ns	0.84077	-0.0245822	ns	unchanged
1655	B4F7A1	Complex III assembly factor LYRM7	Lyrm7	0.0908772	-0.161551	ns	0.582558	0.0116513	ns	unchanged	0.795542	0.0822809	ns	0.393594	-0.0550018	ns	unchanged
1625	B2RZD7	LYR motif-containing protein 9	Lyrm9	0.520864	-0.134329	ns	0.867304	-0.046159	ns	unchanged	0.311181	-0.133584	ns	0.129932	-0.144274	ns	unchanged
5789	Q5HZA4	LysM and putative peptidoglycan-binding domain-containing protein 1	Lysmd1	0.0367748	-0.15558	ns	0.129189	-0.0475692	ns	unchanged	0.492224	-0.0889668	ns	0.154537	0.107676	ns	unchanged
5898	Q5PQN7	Protein LZIC	Lzic	0.719285	-0.121402	ns	0.706138	-0.0162835	ns	unchanged	NA	NA	NA	NA	NA	NA	NA
5598	Q4V8B2	DCN1-like protein 3	Dcun1d3	0.472975	-0.0840816	ns	0.880357	-0.0112209	ns	unchanged	0.00108138	-0.267742	FDR1%	0.564263	0.0411096	ns	less syn
740	G3V8V6;A0A0G2K5F1;Q8K4G6;Q7TNX8	O-acetyl-ADP-ribose deacetylase MACROD1	Macrod1	0.242876	-0.116145	ns	0.106295	-0.0089112	ns	unchanged	0.504976	-0.0301415	ns	0.132215	0.0285174	ns	unchanged
51	A0A096MK73;P13668	Stathmin	Stmn1	0.756082	-0.191385	ns	0.360033	0.0755359	ns	unchanged	0.953131	0.0332778	ns	0.00144214	0.170523	FDR1%	less deg
3818	F1MAQ7;E9PTE1;Q6PDU3		Son	4.65998e-07	-0.161561	FDR1%	0.00097329	0.171306	FDR1%	slower turnover	7.49601e-06	-0.155443	FDR1%	0.127809	-0.0132524	ns	less syn
284	A0A0G2JVU1;D3ZP06	Integrin beta	Itgb8	5.18087e-05	-0.235244	FDR1%	0.999102	0.0283079	ns	less syn	0.664517	0.0357385	ns	0.83295	0.0285897	ns	unchanged
4739	P19103	Protein phosphatase 1 regulatory subunit 1A	Ppp1r1a	0.254709	-0.100201	ns	0.99309	-0.0445582	ns	unchanged	0.000403158	-0.265698	FDR1%	0.262778	0.187789	ns	less syn
6469	Q6AY04	Uncharacterized protein C2orf47 homolog, mitochondrial	Maip1	0.146672	-0.149018	ns	0.978573	0.000273287	ns	unchanged	0.0346442	-0.182982	ns	0.412588	-0.0405417	ns	unchanged
3386	F1LPQ3;Q5M9I2;P21139	Alpha-mannosidase;Alpha-mannosidase 2C1	Man2c1	0.0695643	-0.149974	ns	0.51392	0.0580868	ns	unchanged	0.257605	-0.141968	ns	0.66559	0.12386	ns	unchanged
5363	Q32PX2;A0A0U1RRR6	Aminoacyl tRNA synthase complex-interacting multifunctional protein 2	Aimp2	0.921121	-0.0519813	ns	0.000224028	0.17152	FDR1%	less deg	0.137201	-0.0934949	ns	0.0396398	-0.0665852	ns	unchanged
4012	G3V7I7;A0A0G2QC24		Lrrc40	0.527807	-0.0777615	ns	0.689527	0.0469241	ns	unchanged	0.87707	-0.0245855	ns	0.443138	0.129237	ns	unchanged
4753	P19643;Q99PC8	Amine oxidase [flavin-containing] B	Maob	0.91563	-0.0647839	ns	0.661396	0.0493539	ns	unchanged	0.0830783	-0.297727	ns	0.1632	-0.0615066	ns	unchanged
544	Q6PAH0;Q65ZS7;A0A0G2K151;P02650	Apolipoprotein E	Apoe	0.000539842	0.0834917	FDR1%	0.00211697	0.171592	FDR1%	more syn & less deg	0.00181782	-0.13348	FDR1%	0.350001	-0.00696907	ns	less syn
1241	A9UMV7		Uqcr11	2.1702e-06	-0.235205	FDR1%	0.00588706	0.120513	ns	less syn	0.564585	0.0188479	ns	0.173689	-0.0169035	ns	unchanged
739	A0A0G2K5E7;G3V888;G3V9G4;P16638;P16638-2	ATP-citrate synthase	Acly	1.41974e-06	-0.175295	FDR1%	6.45713e-10	0.172003	FDR1%	slower turnover	0.000106926	-0.161561	FDR1%	1.3154e-09	0.173011	FDR1%	slower turnover
4871	P35565	Calnexin	Canx	0.00306754	-0.107694	ns	1.04374e-07	0.172292	FDR1%	less deg	0.0034898	-0.110272	ns	0.76022	-0.0539849	ns	unchanged
1050	A0A0H2UHQ3;B5DFH2;P0C5W1	Microtubule-associated protein 1S;MAP1S heavy chain;MAP1S light chain	Map1s	0.0120915	-0.123026	ns	0.162659	0.0838349	ns	unchanged	0.661021	-0.0524459	ns	0.00411464	0.139454	ns	unchanged
3344	F1LNK0;A0A0U1RS09;P15146;Q78DZ1;P15146-4;A0A0U1RRQ0	Microtubule-associated protein;Microtubule-associated protein 2	Map2	0.385222	-0.0268634	ns	0.680476	0.0325974	ns	unchanged	0.0113487	0.202541	ns	0.0828745	0.161876	ns	unchanged
3374	F1LPG3;O88588;O88588-2;I6LL99	Phosphofurin acidic cluster sorting protein 1	Pacs1	2.17555e-05	-0.234825	FDR1%	0.104305	0.0377208	ns	less syn	0.265062	0.0171238	ns	0.010825	0.0811587	ns	unchanged
2968	D4A758		Lrrc8b	0.383337	0.0842701	ns	0.670763	0.152863	ns	unchanged	0.800932	-0.225251	ns	0.257448	0.0650175	ns	unchanged
6312	Q641Z6	EH domain-containing protein 1	Ehd1	0.00774916	-0.227807	ns	0.0312525	0.0586779	ns	unchanged	5.69786e-06	0.300431	FDR1%	3.46721e-05	0.117792	FDR1%	more syn & less deg
1600	B2RZ68		Dcaf7	0.000213046	-0.234371	FDR1%	0.0279506	0.168379	ns	less syn	0.572053	-0.02998	ns	0.539816	0.0127235	ns	unchanged
5830	Q5M7W5;Q5M7W5-2	Microtubule-associated protein 4	Map4	0.3044	0.0379383	ns	0.226417	-0.020458	ns	unchanged	0.0385817	0.104929	ns	0.043544	0.114132	ns	unchanged
7189	R9PXT4;Q924I2;A0A0G2JYP2;A0A0G2JVZ8	Mitogen-activated protein kinase kinase kinase kinase;Mitogen-activated protein kinase kinase kinase kinase 3	Map4k3	NA	NA	NA	NA	NA	NA	NA	0.281122	-0.0502033	ns	0.270952	0.153739	ns	unchanged
3020	D4A8G0		Lsm12	0.275732	0.007175	ns	0.0950988	0.193535	ns	unchanged	0.776369	-0.0160655	ns	0.679884	0.0340951	ns	unchanged
3174	D4AD70;P63174;D3ZW57;D3ZZH2;D4A862	60S ribosomal protein L38	RGD1561636;Rpl38;LOC686066;LOC680353;LOC678816	0.622537	-0.0580206	ns	1.60954e-05	0.172439	FDR1%	less deg	0.342312	-0.0383282	ns	0.1764	-0.108788	ns	unchanged
881	A0A0G2K8Q7;Q6MG66;A0A0G2KAB8;A0A0G2K375		Lsm2	0.286061	-0.100574	ns	0.19113	-0.00719935	ns	unchanged	0.765664	-0.000414746	ns	0.402428	0.0349862	ns	unchanged
1888	D3Z9I1		Coa3	0.00589643	-0.144978	ns	2.23878e-06	0.172475	FDR1%	less deg	0.09897	-0.0793387	ns	0.692929	0.00342854	ns	unchanged
2068	D3ZF26		Tnks1bp1	1.23287e-05	-0.234104	FDR1%	0.013765	-0.101599	ns	less syn	0.0134949	-0.120802	ns	0.0316566	-0.0380344	ns	unchanged
4930	P49187;A0A0U1RRS7;B0VXR6;A0A0U1RVI2	Mitogen-activated protein kinase 10;Mitogen-activated protein kinase	Mapk10	0.00734529	-0.297435	ns	0.255712	0.267305	ns	unchanged	0.0263861	-0.226519	ns	0.304444	0.120976	ns	unchanged
3000	D4A7U6		Lsm3	0.801773	-0.0201111	ns	0.570586	0.000813553	ns	unchanged	0.0633775	0.0433108	ns	0.253669	0.089821	ns	unchanged
4612	P09527;A0A0G2K930	Ras-related protein Rab-7a	Rab7a	8.69777e-05	-0.116178	FDR1%	2.91187e-05	0.17248	FDR1%	slower turnover	0.138084	-0.0389242	ns	0.409541	0.00919262	ns	unchanged
1614	B2RZB6		Lsm8	0.534932	-0.0467619	ns	0.147615	-0.0342381	ns	unchanged	0.464951	-0.0653178	ns	0.278603	0.0319796	ns	unchanged
1550	B2RYP6		Luc7l2	0.0555954	-0.138591	ns	0.00715729	0.369909	ns	unchanged	0.292064	-0.117124	ns	0.515401	0.0881531	ns	unchanged
3355	F1LP01;P49621	Diacylglycerol kinase;Diacylglycerol kinase beta	Dgkb	3.23012e-18	-0.393003	FDR1%	1.77139e-05	0.172597	FDR1%	slower turnover	2.69646e-25	-0.51697	FDR1%	0.274805	0.0598161	ns	less syn
4101	G3V8G5;Q62638	Golgi apparatus protein 1	Glg1	2.27966e-18	-0.172932	FDR1%	1.21628e-09	0.173695	FDR1%	slower turnover	1.19696e-29	-0.251504	FDR1%	0.0164213	-0.178766	ns	less syn
7005	Q9ES21	Phosphatidylinositide phosphatase SAC1	Sacm1l	0.229341	-0.0858007	ns	1.26378e-05	0.173798	FDR1%	less deg	6.5062e-14	-0.397704	FDR1%	0.524423	0.00647921	ns	less syn
6591	Q6IMZ5;P70567	Tropomodulin-1	Tmod1	0.00216718	-0.233993	FDR1%	0.249486	0.0146407	ns	less syn	4.64793e-12	-0.837159	FDR1%	0.000225972	-0.18953	FDR1%	less syn & more deg
4742	P19332-3;P19332-7	Microtubule-associated protein tau	Mapt	0.0594077	-0.215	ns	0.687282	-0.00269649	ns	unchanged	0.0595313	0.058633	ns	0.00426118	0.326087	ns	unchanged
1870	D3Z900;O88994;M0R6N2	Mitochondrial amidoxime reducing component 2	Marc2;LOC100910481	0.0507139	-0.186452	ns	0.51898	0.0327999	ns	unchanged	0.403982	-0.0747654	ns	0.737105	0.00687419	ns	unchanged
6910	Q8VHK0;Q6AZ44;F7F557	Acyl-coenzyme A thioesterase 8	Acot8	0.000170545	-0.215457	FDR1%	0.000834485	0.174094	FDR1%	slower turnover	0.230226	-0.0249949	ns	0.0158551	0.0639418	ns	unchanged
4828	P30009;F1LMW7	Myristoylated alanine-rich C-kinase substrate	Marcks	0.509067	-0.0296967	ns	0.687263	-0.0199187	ns	unchanged	0.104654	-0.051788	ns	0.461677	0.0562214	ns	unchanged
2094	D3ZFS7;B2RYW5		Lyplal1	0.117323	-0.167107	ns	0.489141	-0.0254819	ns	unchanged	0.773054	-0.0281486	ns	0.325223	-0.0599329	ns	unchanged
4392	O08678;A0A0G2K7H9	Serine/threonine-protein kinase MARK1	Mark1	0.00296505	-0.249551	ns	0.298288	-0.0083598	ns	unchanged	0.136315	-0.204641	ns	0.209629	0.054544	ns	unchanged
6125	Q5XIJ3;P41565	Isocitrate dehydrogenase [NAD] subunit, mitochondrial;Isocitrate dehydrogenase [NAD] subunit gamma 1, mitochondrial	Idh3g	0.000100419	-0.233712	FDR1%	0.839593	-0.00776326	ns	less syn	0.000305686	-0.166511	FDR1%	0.166612	-0.0270958	ns	less syn
828	A0A0G2K7L2;F1LZ40		Igsf3	0.000122321	-0.226749	FDR1%	0.00117115	0.174463	FDR1%	slower turnover	9.51784e-08	-0.393506	FDR1%	0.0145337	-0.185549	ns	less syn
3483	F1LSM0	Ubiquitin carboxyl-terminal hydrolase	Usp24	0.000967215	-0.23307	FDR1%	0.00338928	0.152034	ns	less syn	0.23009	0.0117368	ns	0.0360842	0.0699039	ns	unchanged
2655	D3ZYM7		Lyrm4	0.923705	-0.0377207	ns	0.953572	0.00963542	ns	unchanged	0.761854	0.0516985	ns	0.00263021	-0.102266	ns	unchanged
4717	P16617;A0A096MJL6	Phosphoglycerate kinase 1	Pgk1	0.000715916	-0.23304	FDR1%	0.0298212	0.0680023	ns	less syn	0.0189601	-0.159719	ns	3.68015e-08	0.179277	FDR1%	less deg
5094	Q3ZB97;P62944;P62944-2	AP complex subunit beta;AP-2 complex subunit beta	Ap2b1	1.4847e-10	-0.232966	FDR1%	0.510899	0.0251496	ns	less syn	1.42503e-09	-0.20668	FDR1%	7.51236e-08	0.106744	FDR1%	slower turnover
253	A0A0G2JV54;Q9Z118	Polypyrimidine tract-binding protein 3	Ptbp3	0.000530446	-0.232961	FDR1%	0.00554295	0.339016	ns	less syn	NA	NA	NA	NA	NA	NA	NA
6388	Q66HG9	Mitochondrial antiviral-signaling protein	Mavs	0.920429	-0.0100084	ns	0.378921	-0.112073	ns	unchanged	0.560107	-0.0558989	ns	0.120476	-0.144815	ns	unchanged
3872	F8WFH8;Q6P7B0;A0A0G2K673		Wars	0.00359797	-0.13236	ns	4.31159e-07	0.174818	FDR1%	less deg	0.662147	-0.0226951	ns	0.0203811	0.117251	ns	unchanged
3311	F1LMN8;Q9JLP1	KH domain-containing, RNA-binding, signal transduction-associated protein 3	Khdrbs3	0.00141564	-0.232754	FDR1%	0.127944	0.144257	ns	less syn	0.598582	0.0724096	ns	0.780625	0.0536835	ns	unchanged
5428	Q3T1J2	Membrane-bound O-acyltransferase domain-containing protein 2	Mboat2	0.590283	-0.143982	ns	0.082993	0.2359	ns	unchanged	NA	NA	NA	NA	NA	NA	NA
554	A0A0G2K1C0;Q4V7C7;Q9ERF9	Actin-related protein 3	Actr3	4.20128e-06	-0.232671	FDR1%	0.186109	0.0215017	ns	less syn	0.160852	-0.0650924	ns	0.00449951	0.081681	ns	unchanged
6947	Q925D6		Map2k6	0.288486	-0.14564	ns	0.178429	0.107905	ns	unchanged	0.00182589	0.593315	FDR1%	5.14058e-06	0.199724	FDR1%	more syn & less deg
845	A0A0G2K7W4;A0A097PIG6		Map4k4	0.321187	0.0486696	ns	0.332074	0.111026	ns	unchanged	0.00253497	0.308843	ns	0.0101007	0.213882	ns	unchanged
3359	F1LP30;Q5I0C3	Methylcrotonoyl-CoA carboxylase subunit alpha, mitochondrial	Mccc1	0.23191	-0.0995138	ns	0.411849	0.00507503	ns	unchanged	0.514428	0.00673261	ns	0.583957	-0.0172755	ns	unchanged
2935	D4A644		Map7d1	0.00607738	-0.0858425	ns	0.0374189	0.159972	ns	unchanged	0.35286	0.00999233	ns	0.535154	0.00208885	ns	unchanged
6963	Q99MZ4	Gamma-glutamyltransferase 7;Gamma-glutamyltransferase 7 heavy chain;Gamma-glutamyltransferase 7 light chain	Ggt7	1.48318e-05	-0.232571	FDR1%	0.00291098	0.192419	ns	less syn	0.106111	-0.108838	ns	0.350529	-0.0278754	ns	unchanged
953	D4A7F3;A0A0G2KA20;Q63406;A0A0G2JU75	Guanine nucleotide exchange factor DBS	Mcf2l	0.159756	-0.0321366	ns	0.191859	0.181774	ns	unchanged	0.0762384	0.173578	ns	0.434084	0.122327	ns	unchanged
4613	P09606	Glutamine synthetase	Glul	0.730828	0.0166124	ns	0.0118624	-0.073381	ns	unchanged	0.0002065	-0.261863	FDR1%	0.0073451	-0.0865083	ns	less syn
6295	Q63965	Sideroflexin-1	Sfxn1	0.00064812	-0.2323	FDR1%	0.447678	-0.0112926	ns	less syn	0.0563097	-0.0866473	ns	0.0464591	0.0268863	ns	unchanged
1643	B4F764;Q4KM65	Cleavage and polyadenylation specificity factor subunit 5	Nudt21	9.80957e-06	-0.232182	FDR1%	0.188903	0.0875355	ns	less syn	0.0513297	-0.127421	ns	0.370702	-0.00957106	ns	unchanged
1014	A0A0H2UH93;P60756	MAM domain-containing glycosylphosphatidylinositol anchor protein 2	Mdga2	NA	NA	NA	NA	NA	NA	NA	0.128278	-0.127424	ns	0.354281	0.089981	ns	unchanged
1226	F1LNF1;A7VJC2;A7VJC2-4;A7VJC2-2;F1LM82;A7VJC2-3;B2GV69	Heterogeneous nuclear ribonucleoproteins A2/B1	Hnrnpa2b1	6.46667e-08	-0.231913	FDR1%	0.00543597	-0.067425	ns	less syn	0.087066	-0.0847666	ns	0.12191	-0.0349034	ns	unchanged
1058	A0A0H2UHS9;Q3KR56	GRAM domain-containing protein 1A	Gramd1a	0.146568	-0.175384	ns	0.538166	0.0141147	ns	unchanged	0.000666496	-0.261572	FDR1%	0.559374	-0.0512223	ns	less syn
5112	Q568Y8;P63043-2;P63043;P63043-3	Stathmin-4	Stmn4	0.000261743	-0.231866	FDR1%	0.0483667	0.470816	ns	less syn	0.616555	0.0591413	ns	0.434208	0.143217	ns	unchanged
5160	P70580;A0A0H2UHK2	Membrane-associated progesterone receptor component 1	Pgrmc1	0.00144934	-0.174903	FDR1%	0.00153304	0.174848	FDR1%	slower turnover	6.68507e-06	-0.179905	FDR1%	0.259293	0.0279591	ns	less syn
6923	Q91Z79;F1LSE6	Liprin-alpha-3	Ppfia3	0.00062035	-0.231726	FDR1%	0.98925	0.00272619	ns	less syn	0.231425	0.0151161	ns	5.34668e-05	0.170923	FDR1%	less deg
716	D3ZJH9;A0A0G2K502	Malic enzyme	Me2	0.0849148	-0.0718424	ns	0.897869	0.0491078	ns	unchanged	0.0236037	-0.0949562	ns	0.00793341	-0.0610214	ns	unchanged
1486	B2GV75;P84850;A0A0A0MXZ3	D-2-hydroxyglutarate dehydrogenase, mitochondrial	D2hgdh	0.0332501	-0.133092	ns	0.949183	0.00558328	ns	unchanged	0.00144821	-0.260312	FDR1%	0.873114	-0.0174933	ns	less syn
5240	Q00566-2;A0A0G2JWK2;Q00566	Methyl-CpG-binding protein 2	Mecp2	0.101708	-0.156298	ns	0.514911	0.0260185	ns	unchanged	0.0980637	-0.134574	ns	0.84703	-0.0019006	ns	unchanged
1117	A0A140TAE6;Q9Z311;Q9Z311-2	Trans-2-enoyl-CoA reductase, mitochondrial	Mecr	0.0246934	-0.112027	ns	0.038311	-0.0356421	ns	unchanged	0.0701598	-0.128636	ns	0.130192	-0.0148027	ns	unchanged
1065	A0A0H2UHV2;Q5EB59	Mediator of RNA polymerase II transcription subunit 23	Med23	0.0775961	-0.217624	ns	0.0145611	0.227304	ns	unchanged	NA	NA	NA	NA	NA	NA	NA
1312	B0BNF6		March5	0.00347502	-0.155414	ns	0.024153	0.122691	ns	unchanged	0.120889	-0.101857	ns	0.760899	-0.0012028	ns	unchanged
219	A0A0G2JUG7	Submitted name: IQ motif and Sec7 domain 1	Iqsec1	1.39682e-06	-0.231716	FDR1%	0.074483	0.0799468	ns	less syn	1.7487e-06	-0.239378	FDR1%	0.67883	0.052109	ns	less syn
3337	F1LNE5;Q4QQR9	Protein MEMO1	Memo1	0.11768	-0.225053	ns	0.538846	0.0592984	ns	unchanged	NA	NA	NA	NA	NA	NA	NA
2373	D3ZQG6;D3ZM62;A0A0G2K2M8	Tripartite motif-containing protein 2	Trim2	1.60158e-06	-0.231191	FDR1%	0.00354105	0.0785501	ns	less syn	0.00140622	0.153191	FDR1%	1.39664e-13	0.194663	FDR1%	more syn & less deg
6773	Q76EQ0;A0A0U1RRW0	Serine racemase	Srr	0.164127	-0.170329	ns	2.31536e-07	0.174891	FDR1%	less deg	0.0695694	0.093762	ns	4.58684e-05	0.200723	FDR1%	less deg
1498	B2GVB4;Q9QZR6;Q9QZR6-2;Q9QZR6-3;Q9QZR6-4;F1LN75	Septin-9	Sept9	0.00102719	-0.230987	FDR1%	0.5863	0.0371764	ns	less syn	0.000986665	-0.189331	FDR1%	0.147087	0.0537512	ns	less syn
4957	P51907	Excitatory amino acid transporter 3	Slc1a1	6.07919e-08	-0.304288	FDR1%	0.00211237	0.174913	FDR1%	slower turnover	2.97478e-05	-0.229048	FDR1%	0.625718	-0.173519	ns	less syn
973	A0A0G2KAL9	Submitted name: Mitochondrial fission factor	Mff	NA	NA	NA	NA	NA	NA	NA	0.0361017	0.182328	ns	0.80876	0.180379	ns	unchanged
5155	P70490;A0A0G2K506;Q1PBJ1	Lactadherin	Mfge8	0.333633	0.0301213	ns	0.964501	0.0346985	ns	unchanged	0.399524	0.0550939	ns	0.0713745	0.0668846	ns	unchanged
6307	Q641Y2	NADH dehydrogenase [ubiquinone] iron-sulfur protein 2, mitochondrial	Ndufs2	4.51312e-06	-0.230842	FDR1%	0.637584	0.00152038	ns	less syn	0.00458788	-0.145871	ns	1.08346e-05	-0.0689773	FDR1%	more deg
7120	Q9R1T1	Barrier-to-autointegration factor;Barrier-to-autointegration factor, N-terminally processed	Banf1	0.325692	-0.144273	ns	0.000220792	0.175066	FDR1%	less deg	0.0130154	0.195292	ns	0.140483	0.12121	ns	unchanged
6893	Q8R431;A0A0G2JYI5	Monoglyceride lipase	Mgll	0.377895	-0.138369	ns	0.636827	0.0199891	ns	unchanged	0.201204	-0.284429	ns	0.0429871	0.0675523	ns	unchanged
1845	D3KR63;F1LQ26;Q9Z1C7	Rap guanine nucleotide exchange factor 4	Rapgef4	0.00111567	-0.230779	FDR1%	0.76478	0.0131988	ns	less syn	5.07995e-05	-0.224327	FDR1%	0.00587948	0.0829316	ns	less syn
1784	B6DYQ4;P08011	Microsomal glutathione S-transferase 1	Mgst1	0.00468237	-0.192386	ns	0.602329	0.0211794	ns	unchanged	0.0378994	0.0442505	ns	0.440424	-0.0289614	ns	unchanged
1768	B5DFK0;G3V7N6		Mboat7;LOC100909580	0.0200141	-0.199321	ns	0.0301797	0.163663	ns	unchanged	0.00160497	-0.285988	FDR1%	0.580472	-0.0408845	ns	less syn
2338	D3ZPF2		Mcat	0.442046	-0.170419	ns	0.667827	-0.0136732	ns	unchanged	0.40118	-0.0941251	ns	0.713601	0.0136442	ns	unchanged
2752	D4A197		Mcee	0.00815274	-0.167729	ns	0.255849	-0.0467124	ns	unchanged	0.0218425	-0.17936	ns	0.0427771	-0.0829324	ns	unchanged
1237	A9CMB7;P15178	Aspartate--tRNA ligase, cytoplasmic	Dars	0.0535207	-0.040895	ns	4.34471e-14	0.175241	FDR1%	less deg	0.572715	-0.0173739	ns	0.00580255	-0.0823782	ns	unchanged
6380	Q66HE3		Wsb2	0.00657731	-0.340098	ns	0.00139742	0.175519	FDR1%	less deg	0.554956	-0.100676	ns	0.0805132	0.136708	ns	unchanged
490	A0A0G2K059;M0RDI5		Mcu	0.0212147	-0.177086	ns	0.170825	-0.0293731	ns	unchanged	0.000561715	-0.33472	FDR1%	0.591017	-0.014256	ns	less syn
4429	O35346;A0A0G2KAT5;Q62899;Q62898;O35346-2	Focal adhesion kinase 1	Ptk2	0.00319966	-0.208056	ns	0.650624	0.0163047	ns	unchanged	0.0161577	0.20965	ns	0.000512564	0.167449	FDR1%	less deg
922	A0A0G2K9J0;F1LTE0		Tanc2	0.000130442	-0.230417	FDR1%	0.676984	0.0260636	ns	less syn	0.236663	0.0816579	ns	0.116464	0.104642	ns	unchanged
1581	B2RYW8	MICOS complex subunit Mic10	Minos1	0.250682	0.234658	ns	0.0167146	0.317289	ns	unchanged	0.247327	0.179647	ns	0.147397	0.0805091	ns	unchanged
3509	F1LTX8;Q6TXI6		Lpgat1;LOC317456	2.09508e-05	-0.230283	FDR1%	0.0523013	0.143671	ns	less syn	0.00158337	-0.194067	FDR1%	0.269971	0.0274065	ns	less syn
710	A0A0G2K4T8;F1LPX0;Q01992	Mitochondrial intermediate peptidase	Mipep	0.589401	-0.0346266	ns	0.0144	0.0881254	ns	unchanged	0.603923	-0.0398336	ns	0.969507	-0.031873	ns	unchanged
2886	D4A4U3		Mdp1	0.0285154	-0.169952	ns	0.536616	0.051228	ns	unchanged	0.0256086	-0.0795475	ns	0.324855	0.167722	ns	unchanged
539	A0A0G2K121;Q5FVQ4	Malectin	Mlec	0.663948	0.00190342	ns	0.00291079	0.08609	ns	unchanged	0.0697859	-0.120881	ns	0.716432	-0.0278607	ns	unchanged
3816	F1MAP4		Megf10	0.134823	0.253225	ns	0.0244235	0.402378	ns	unchanged	NA	NA	NA	NA	NA	NA	NA
5857	Q5M971	Protein AF1q	Mllt11	0.397044	-0.061254	ns	0.00609505	0.408564	ns	unchanged	NA	NA	NA	NA	NA	NA	NA
4450	O35889	Afadin	Mllt4	0.183059	-0.204048	ns	0.585034	-0.0919797	ns	unchanged	0.985522	0.0276356	ns	0.775248	0.0400577	ns	unchanged
2832	D4A3L3		Megf9	NA	NA	NA	NA	NA	NA	NA	0.548002	-0.288508	ns	0.298227	0.0895415	ns	unchanged
6931	Q920F5-2;Q920F5	Malonyl-CoA decarboxylase, mitochondrial	Mlycd	0.377202	-0.0979914	ns	0.777344	-0.0356323	ns	unchanged	0.518755	-0.0499661	ns	0.936906	-0.0318182	ns	unchanged
5401	Q3KRE2;Q3SWU1		Mettl7a	0.884117	0.0399457	ns	0.60933	0.0694702	ns	unchanged	0.198533	0.0746683	ns	0.0945463	-0.0528843	ns	unchanged
2536	D3ZV75		Mfsd1	0.676537	0.0518128	ns	0.398418	0.100386	ns	unchanged	NA	NA	NA	NA	NA	NA	NA
1729	B5DF51	Membrane magnesium transporter 1	Mmgt1	0.329031	-0.0722108	ns	0.064655	0.329162	ns	unchanged	0.434124	-0.0348952	ns	0.499101	-0.00970221	ns	unchanged
3189	D4ADS4		Mgst3	0.908018	-0.0186476	ns	0.0772736	0.033198	ns	unchanged	0.000757293	-0.261982	FDR1%	0.0655177	0.0243825	ns	less syn
2774	D4A1V7;Q3T1J9	MOB kinase activator 1A	Mob1b;Mob1a	0.46069	-0.0781695	ns	0.071936	0.191331	ns	unchanged	0.0101036	0.307577	ns	0.645531	0.09685	ns	unchanged
7101	Q9QYW3	MOB-like protein phocein	Mob4	0.00400196	-0.309283	ns	0.235383	0.00459502	ns	unchanged	0.268683	-0.161893	ns	0.216083	0.0317929	ns	unchanged
3050	D4A9D6		Dhx9	9.58268e-13	-0.21662	FDR1%	6.38007e-09	0.175689	FDR1%	slower turnover	2.84285e-09	0.10699	FDR1%	0.37058	0.0459519	ns	more syn
2852	D4A3X6	Phospholipid-transporting ATPase	Atp8a2	0.751643	0.0495908	ns	0.000235955	0.175708	FDR1%	less deg	1.4698e-06	-0.388383	FDR1%	0.532221	0.0115038	ns	less syn
6265	Q63584	Transmembrane emp24 domain-containing protein 10	Tmed10	0.377742	-0.00294189	ns	1.11686e-07	0.176004	FDR1%	less deg	0.465567	-0.0360935	ns	0.947543	-0.0433982	ns	unchanged
5108	P63031	Mitochondrial pyruvate carrier 1	Mpc1	0.00563061	-0.248909	ns	0.550972	0.0580931	ns	unchanged	0.0177329	-0.290379	ns	0.102708	-0.0642838	ns	unchanged
4885	P38718-2;P38718	Mitochondrial pyruvate carrier 2	Mpc2	0.0042956	-0.197723	ns	0.58181	0.0303161	ns	unchanged	0.013682	-0.25767	ns	0.77724	-0.0498493	ns	unchanged
2521	D3ZUV2		Mib1	0.355421	-0.123863	ns	0.0129932	0.172201	ns	unchanged	0.720522	0.0127258	ns	0.154494	0.0165176	ns	unchanged
3462	F1LRV6;Q9Z244	GMP reductase;GMP reductase 1	Gmpr	0.00687567	-0.212078	ns	0.00017725	0.176947	FDR1%	less deg	2.28581e-05	-0.426773	FDR1%	0.432344	-0.0392922	ns	less syn
1145	A0A1E1ERK2;P32851;Q9QXG3	Syntaxin-1A	Stx1a	0.360622	-0.0810216	ns	0.30886	0.0158967	ns	unchanged	0.0628048	-0.143947	ns	1.69614e-06	0.165997	FDR1%	less deg
4611	P09495;A0A0G2K2G8	NHS-like 1	Tpm4	0.197057	0.0337708	ns	0.429753	0.0831299	ns	unchanged	0.0011309	-0.259435	FDR1%	0.256463	0.083445	ns	less syn
5103	P63004	Platelet-activating factor acetylhydrolase IB subunit alpha	Pafah1b1	2.34226e-20	-0.294992	FDR1%	0.000303802	0.177116	FDR1%	slower turnover	0.64696	-0.0340126	ns	0.0128245	0.139866	ns	unchanged
2119	D3ZGN7;Q5XIM1		Mical3	0.00928442	-0.192614	ns	0.625516	0.0448927	ns	unchanged	0.534938	-0.0522252	ns	0.0247276	0.082152	ns	unchanged
5205	P97532	3-mercaptopyruvate sulfurtransferase	Mpst	0.0355073	-0.0851088	ns	0.12991	0.0348576	ns	unchanged	0.00538296	-0.130498	ns	0.0864076	-0.0204359	ns	unchanged
5208	Q5RKJ7;P97538	Ras-related protein M-Ras	Mras	0.013779	-0.184051	ns	0.00824444	0.107748	ns	unchanged	0.0225831	0.125892	ns	0.674142	0.00567791	ns	unchanged
3990	G3V781;Q9JIM0	Double-strand break repair protein MRE11A	Mre11a	0.290364	-0.187009	ns	0.00250468	0.294241	ns	unchanged	0.117915	0.224256	ns	0.3998	-0.0130878	ns	unchanged
5793	Q5HZE4	Methylthioribose-1-phosphate isomerase	Mri1	0.189253	-0.184952	ns	0.741121	0.0955265	ns	unchanged	0.423729	0.104363	ns	0.275108	0.0895369	ns	unchanged
2108	D3ZG95;Q5BJV0		Micu3	0.268062	-0.296134	ns	0.725175	0.0112078	ns	unchanged	0.226249	0.0575308	ns	0.16211	0.0396585	ns	unchanged
2613	D3ZX69;P0C2C4	39S ribosomal protein L10, mitochondrial	Mrpl10	0.142378	-0.0544496	ns	0.39053	0.0496497	ns	unchanged	0.0541235	-0.113061	ns	0.154508	0.00143308	ns	unchanged
421	A0A0G2JYU2;Q5XIE3	39S ribosomal protein L11, mitochondrial	Mrpl11	0.0533524	-0.127768	ns	0.0380191	0.064757	ns	unchanged	0.0945437	-0.142367	ns	0.434872	-0.0543701	ns	unchanged
1881	D3Z9C0		Mios	0.0037464	-0.21019	ns	0.00770149	0.147351	ns	unchanged	0.314969	-0.0678536	ns	0.84668	-0.0141077	ns	unchanged
6790	Q7M0E7	39S ribosomal protein L14, mitochondrial	Mrpl14	0.0467773	-0.0899956	ns	0.94057	0.0181653	ns	unchanged	0.0280509	-0.137237	ns	0.0267011	-0.0748743	ns	unchanged
2737	D4A0Y6		Mki67	0.625119	-0.363121	ns	0.196765	0.111781	ns	unchanged	NA	NA	NA	NA	NA	NA	NA
5834	Q5M818;A8USQ2;Q6PEC2	39S ribosomal protein L16, mitochondrial	Mrpl16	0.12398	-0.114183	ns	0.44025	0.0495491	ns	unchanged	0.00731378	-0.203707	ns	0.0670911	-0.0680515	ns	unchanged
5054	P62246;D3ZLL8;D3ZS61;A0A0G2JYA6	40S ribosomal protein S15a	Rps15a;LOC691716;LOC100364191	0.48814	-0.0560549	ns	0.00153667	0.177477	FDR1%	less deg	0.0176617	-0.139279	ns	0.0797649	-0.187973	ns	unchanged
5464	Q498T4	39S ribosomal protein L2, mitochondrial	Mrpl2	0.405516	-0.0720725	ns	0.335871	0.128084	ns	unchanged	0.445307	-0.0620076	ns	0.95292	-0.0460614	ns	unchanged
2327	D3ZNY3		Mmaa	0.366225	-0.108781	ns	0.406613	0.0804933	ns	unchanged	0.577496	-0.0225136	ns	0.865733	0.00879967	ns	unchanged
4313	M0R959		Mmab	0.279598	-0.139377	ns	0.652883	0.0322222	ns	unchanged	0.0103701	-0.160761	ns	0.712171	-0.0693222	ns	unchanged
1059	A0A0H2UHT3;P0C2C0	39S ribosomal protein L22, mitochondrial	Mrpl22	0.239735	-0.068114	ns	0.13452	0.130372	ns	unchanged	0.0329118	-0.12112	ns	0.157501	0.0372148	ns	unchanged
6286	Q63750	39S ribosomal protein L23, mitochondrial	Mrpl23	0.140099	-0.0912517	ns	0.0397867	0.165913	ns	unchanged	0.00517267	-0.121632	ns	0.752976	0.000675803	ns	unchanged
6359	Q66H47	39S ribosomal protein L24, mitochondrial	Mrpl24	0.871704	-0.0857061	ns	0.649404	0.0685521	ns	unchanged	0.287657	-0.13839	ns	0.0963088	-0.0500513	ns	unchanged
4275	M0R6T4		Mms19	0.30617	-0.0310992	ns	0.0330024	0.161504	ns	unchanged	0.652542	0.0958521	ns	0.182881	0.081857	ns	unchanged
2203	Q642E2;D3ZJD3;D3ZEI0;P17702;A0A0G2K8E0	60S ribosomal protein L28	LOC100362069;RGD1565183;LOC690096;Rpl28	0.704433	-0.0384134	ns	1.48887e-05	0.177643	FDR1%	less deg	0.0500191	-0.0792831	ns	0.295329	-0.0844296	ns	unchanged
4030	G3V7P3;P18665	39S ribosomal protein L3, mitochondrial	Mrpl3	0.881846	-0.0111612	ns	0.631395	0.0299241	ns	unchanged	0.516896	-0.095998	ns	0.0166933	-0.03471	ns	unchanged
6457	Q6AXT0;A0A0G2KA48	39S ribosomal protein L37, mitochondrial	Mrpl37	0.191775	-0.0970253	ns	0.552022	-0.0169225	ns	unchanged	0.468724	-0.0793397	ns	0.0801627	-0.0541386	ns	unchanged
5899	Q5PQN9	39S ribosomal protein L38, mitochondrial	Mrpl38	0.891025	-0.0849036	ns	0.423708	-0.0759033	ns	unchanged	NA	NA	NA	NA	NA	NA	NA
867	A0A0G2K8D1;D4A4X7		Mospd2	NA	NA	NA	NA	NA	NA	NA	0.00039334	-0.453423	FDR1%	0.126988	-0.130713	ns	less syn
5178	P83565	39S ribosomal protein L40, mitochondrial	Mrpl40	0.800374	-0.0106945	ns	0.560753	0.0265507	ns	unchanged	0.136194	-0.0610679	ns	0.407304	-0.0312652	ns	unchanged
5704	Q5BJX1;D3ZH23	39S ribosomal protein L41, mitochondrial	Mrpl41;RGD1560917	0.506571	-0.0791078	ns	0.68776	0.0187537	ns	unchanged	0.296977	-0.104429	ns	0.0414394	-0.0733709	ns	unchanged
1850	D3Z865		Mpdu1	0.0585012	-0.139702	ns	0.0226464	0.110499	ns	unchanged	0.00432361	-0.223596	ns	0.814699	-0.0362362	ns	unchanged
6984	Q9EPH2;A0A0G2K613	MARCKS-related protein	Marcksl1	0.00038461	-0.230194	FDR1%	0.662375	0.0280895	ns	less syn	5.02746e-08	-0.303214	FDR1%	0.0775313	0.0682142	ns	less syn
4997	P56574;A0A0G2JUF6	Isocitrate dehydrogenase [NADP], mitochondrial	Idh2	7.74681e-05	-0.230098	FDR1%	0.286359	0.00345255	ns	less syn	0.157114	-0.0767937	ns	0.00336978	-0.10015	ns	unchanged
5936	Q5RK00	39S ribosomal protein L46, mitochondrial	Mrpl46	0.0758972	-0.129655	ns	0.0842289	-0.0264385	ns	unchanged	0.23178	-0.101604	ns	0.00423296	-0.112515	ns	unchanged
334	A0A0G2JWU3;F1M9A4;B5DER4;D3ZFE9;A0A0G2JUV4		Mrpl1	0.254566	-0.107911	ns	0.296868	0.0839924	ns	unchanged	0.162373	-0.157798	ns	0.642445	-0.0183768	ns	unchanged
2620	D3ZXF9		Mrpl12	0.153767	-0.0833592	ns	0.155194	-0.0297125	ns	unchanged	0.12104	-0.0916755	ns	0.206644	-0.00594177	ns	unchanged
906	A0A0G2K9B4;D4A4B1		Mrpl15	0.0275817	-0.097802	ns	0.633791	0.0725834	ns	unchanged	0.00844754	-0.134283	ns	0.219028	-0.0527042	ns	unchanged
2865	D4A4A9		Mrpl19	0.467886	-0.12825	ns	0.426713	0.0672284	ns	unchanged	0.402966	-0.102833	ns	0.842495	-0.0281167	ns	unchanged
1480	B2GV62		Mrpl20	0.513192	-0.0198459	ns	0.314921	0.0840714	ns	unchanged	0.0208491	-0.261882	ns	0.0810624	-0.0700514	ns	unchanged
6304	Q641X9	39S ribosomal protein L9, mitochondrial	Mrpl9	NA	NA	NA	NA	NA	NA	NA	0.351449	-0.169787	ns	0.54727	-0.109116	ns	unchanged
2299	D3ZMR9		Mrpl21	0.62311	-0.0712936	ns	0.163301	0.110827	ns	unchanged	0.0180995	-0.133951	ns	0.982137	-0.0165233	ns	unchanged
6063	Q5XI37	28S ribosomal protein S15, mitochondrial	Mrps15	0.587782	-0.0710124	ns	0.365746	0.0710054	ns	unchanged	0.476671	-0.0825554	ns	0.680546	-0.0692198	ns	unchanged
2481	D3ZTW8		Mrpl27	0.351811	-0.142205	ns	0.0125283	0.170393	ns	unchanged	0.154307	-0.262489	ns	0.930767	-0.0156659	ns	unchanged
2220	D3ZJY1		Mrpl28	0.442856	-0.102161	ns	0.292911	0.0902346	ns	unchanged	0.173175	-0.110395	ns	0.613021	-0.0207541	ns	unchanged
4270	M0R6J0		Mrpl39	0.707172	-0.00689381	ns	0.225359	0.0571261	ns	unchanged	0.354751	-0.0400991	ns	0.952087	0.0111105	ns	unchanged
2619	D3ZXF8		Mrpl43	0.443217	-0.074926	ns	0.68943	0.0324705	ns	unchanged	0.632054	-0.154841	ns	0.46877	-0.0347294	ns	unchanged
5500	Q4G067		Mrpl44	0.903188	-0.0342029	ns	0.106344	0.0765901	ns	unchanged	0.749773	-0.047575	ns	0.584013	0.00254393	ns	unchanged
2739	D4A104		Mrpl45	0.784491	-0.0142775	ns	0.0451538	0.0945994	ns	unchanged	0.045923	-0.125263	ns	0.110892	-0.0740373	ns	unchanged
5389	Q3B8R7		Mrpl47	0.434858	-0.0897746	ns	0.97417	0.0446543	ns	unchanged	0.00930867	-0.302833	ns	0.030246	-0.0738747	ns	unchanged
2026	D3ZDX7		Mrpl48	0.0142479	-0.140005	ns	0.0421517	0.0552017	ns	unchanged	0.0482167	-0.186044	ns	0.673766	0.0136228	ns	unchanged
6808	Q7TP77		Mrpl49	0.0560086	-0.0939731	ns	0.338797	0.0542119	ns	unchanged	0.0632515	-0.135481	ns	0.127616	-0.0439383	ns	unchanged
6987	Q9EPJ3	28S ribosomal protein S26, mitochondrial	Mrps26	0.0782673	-0.149654	ns	0.0300886	0.0497774	ns	unchanged	0.592749	-0.0496289	ns	0.230061	-0.0287956	ns	unchanged
2654	D3ZYL4		Mrpl50	0.269677	-0.0738277	ns	0.652243	0.0539075	ns	unchanged	0.0744827	-0.200048	ns	0.00406052	-0.0331491	ns	unchanged
1579	B2RYW4		Mrpl53	0.119879	-0.102964	ns	0.490357	0.00938183	ns	unchanged	0.0146519	-0.189304	ns	0.167124	-0.0380106	ns	unchanged
2716	D4A040;D4A0K2		Mrps11;LOC690271	0.232314	-0.140051	ns	0.175094	0.124346	ns	unchanged	0.383819	-0.12086	ns	0.13929	-0.0596393	ns	unchanged
1276	B0BN56	28S ribosomal protein S31, mitochondrial	Mrps31	0.174637	-0.122809	ns	0.0694416	0.0705447	ns	unchanged	0.653661	-0.032813	ns	0.143305	-0.0338284	ns	unchanged
2474	D3ZTR1		Mrps17	0.127278	-0.16086	ns	0.0425947	0.0261339	ns	unchanged	0.498886	-0.0510036	ns	0.321972	0.025923	ns	unchanged
6697	Q6PDU2		Mrps18a	0.740184	0.00494798	ns	0.155382	0.0320085	ns	unchanged	0.0321519	-0.163703	ns	0.622645	-0.041007	ns	unchanged
3834	Q6MG10;F6Q5K7;A0A0G2JXL3;A0A0G2JUQ9		Mrps18b	0.0291249	-0.246149	ns	0.790956	0.0114957	ns	unchanged	0.309906	-0.0524182	ns	0.871236	-0.0462662	ns	unchanged
4282	M0R776;A0A0G2JZC3	Heterogeneous nuclear ribonucleoprotein Q	Mrps36	0.56959	-0.0674492	ns	0.244977	0.0489275	ns	unchanged	0.090017	-0.155216	ns	0.13434	-0.0192796	ns	unchanged
2637	D3ZY44		Mrps2	0.0647965	-0.0855894	ns	0.204722	0.0630397	ns	unchanged	0.0191284	-0.155968	ns	0.0567277	-0.085787	ns	unchanged
1565	B2RYT0;M0R3S1		Mrps21;LOC100911433	0.181007	-0.170347	ns	0.136209	0.072376	ns	unchanged	0.595878	-0.0941036	ns	0.104171	-0.107849	ns	unchanged
5815	Q5I0K8	28S ribosomal protein S7, mitochondrial	Mrps7	0.414696	-0.11032	ns	0.306097	0.0695175	ns	unchanged	0.858287	-0.0492459	ns	0.103227	-0.0383268	ns	unchanged
5306	Q0D2L2		Mrps22	0.911429	-0.150428	ns	0.615469	0.00506241	ns	unchanged	0.75976	-0.0309159	ns	0.558499	-0.0600717	ns	unchanged
5959	Q5RKI9	Ribosome-recycling factor, mitochondrial	Mrrf	0.755916	-0.0296452	ns	0.305514	-0.0127329	ns	unchanged	0.14744	-0.151973	ns	0.0719102	-0.139569	ns	unchanged
6878	Q8K3P4;F1LRH1	RNA-binding protein Musashi homolog 1	Msi1	0.0931899	0.0587105	ns	0.887783	0.0517774	ns	unchanged	0.206858	0.0225925	ns	0.0552099	-0.164046	ns	unchanged
2180	D3ZIN7		Mrps23	0.43191	-0.0784487	ns	0.39087	0.0607812	ns	unchanged	0.0148048	-0.178619	ns	0.109017	-0.0592376	ns	unchanged
6590	Q6IMZ3;P48037;D3ZXN8	Annexin;Annexin A6	Anxa6;Anxa10	1.15878e-07	-0.170575	FDR1%	1.6467e-05	0.177898	FDR1%	slower turnover	1.02065e-19	-0.232445	FDR1%	6.07056e-05	-0.154992	FDR1%	less syn & more deg
916	A9UMV2;A0A0G2K9G3		Mrps24	0.037383	-0.209809	ns	0.191724	0.112778	ns	unchanged	0.447579	-0.0956034	ns	0.202094	-0.0732074	ns	unchanged
1624	B2RZD6		Ndufa4	8.60582e-08	-0.229823	FDR1%	0.224287	0.0665091	ns	less syn	0.000512147	-0.219496	FDR1%	0.119822	-0.129682	ns	less syn
2826	D4A3E8;A0A0G2K6X0		Mrps27	0.0376863	-0.201366	ns	0.836171	0.0208167	ns	unchanged	0.547949	-0.0205699	ns	0.154008	-0.0490019	ns	unchanged
176_m	A0A0G2JTK6;D3ZPH3	Submitted name: Metastasis-associated 1 family, member 3	Mta3	0.124905	-0.102431	ns	0.0045825	0.327584	ns	unchanged	0.757688	-0.0548928	ns	0.0516606	-0.291281	ns	unchanged
728	A0A0G2K583;Q7TP15	S-methyl-5-thioadenosine phosphorylase	Mtap	0.196482	-0.00673858	ns	0.0406414	0.148925	ns	unchanged	NA	NA	NA	NA	NA	NA	NA
1508	B2RYC9	Glucosylceramidase	Gba	0.0372047	-0.0343274	ns	4.09802e-08	0.178198	FDR1%	less deg	2.64764e-05	0.14851	FDR1%	0.00398945	0.12495	ns	more syn
876	A0A0G2K8L9;Q6TXG8		Mrps28	0.464005	-0.0820283	ns	0.961976	0.0203638	ns	unchanged	0.659043	-0.118343	ns	0.0900904	-0.0688027	ns	unchanged
7167	Q9Z1W6;Q9Z1W6-3;Q9Z1W6-2;Q9Z1W6-4	Protein LYRIC	Mtdh	0.186036	-0.0499318	ns	0.398114	0.0328316	ns	unchanged	0.654014	-0.0300308	ns	0.303066	-0.054265	ns	unchanged
1383	B1H2A6;Q8K4F9		Fxr2	0.00286915	-0.0983938	FDR1%	0.00201234	0.178672	FDR1%	slower turnover	0.0190585	-0.11366	ns	0.761989	-0.132296	ns	unchanged
6124	Q5XII9	Mitochondrial fission regulator 1-like	Mtfr1l	0.0518775	-0.211803	ns	0.724895	-0.00608394	ns	unchanged	0.0385012	-0.16431	ns	0.772572	-0.00721239	ns	unchanged
2816	D4A304		Diras1	2.11682e-08	-0.235178	FDR1%	0.0018975	0.178967	FDR1%	slower turnover	3.24735e-05	-0.224982	FDR1%	0.0190961	0.121593	ns	less syn
5982	Q5U2N2;A0A0G2JVV5	Ubiquitin carboxyl-terminal hydrolase	Usp14	0.0451938	-0.0991447	ns	5.62845e-06	0.179322	FDR1%	less deg	0.426928	-0.0596057	ns	0.0119558	0.123722	ns	unchanged
3010	D4A833		Mrps30	0.129537	-0.0864192	ns	0.160583	0.0256371	ns	unchanged	0.42616	-0.0889684	ns	0.0873513	-0.0681072	ns	unchanged
5317	Q0ZFS4		Mrps33	0.369436	-0.092899	ns	0.10163	0.0679701	ns	unchanged	0.371782	-0.0815009	ns	0.720803	-0.0608143	ns	unchanged
6706	Q6PST4	Atlastin-1	Atl1	8.38041e-17	-0.358193	FDR1%	2.18373e-05	0.180075	FDR1%	slower turnover	1.66113e-14	-0.325274	FDR1%	0.00184742	0.0786951	ns	less syn
3116	D4ABM5		Mrps34	0.20726	-0.144658	ns	0.40218	0.0349646	ns	unchanged	0.101637	-0.15613	ns	0.451483	0.017554	ns	unchanged
3071	D4A9Z6		Mrps35	0.298319	-0.0938865	ns	0.339211	0.0906035	ns	unchanged	0.949408	-0.0772778	ns	0.0100189	-0.0431185	ns	unchanged
2662	D3ZYT2		Mrps5	0.363265	-0.073895	ns	0.903462	0.00229899	ns	unchanged	0.144263	-0.0335044	ns	0.0617147	-0.0842006	ns	unchanged
6870	Q8HN20;Q8SEZ8;Q8HID1;D2E6L7;P03889	NADH-ubiquinone oxidoreductase chain 1	Mt-nd1;ND1;Mtnd1	0.428748	-0.0895392	ns	0.782237	0.0538416	ns	unchanged	0.924413	-0.0865867	ns	0.652061	-0.0318201	ns	unchanged
92	Q8SEZ1;Q06QG9;A0A0A1FZ38;P05506	NADH-ubiquinone oxidoreductase chain 3	Mt-nd3;ND3;Mtnd3	0.115809	-0.200256	ns	0.886274	0.0357021	ns	unchanged	0.212241	-0.148999	ns	0.118079	-0.139343	ns	unchanged
1228	Q8HIC6;Q7HKW3;Q35737;Q06QG7;Q06QE1;Q06QA2;Q06Q89;D2E6K0;A7XYB9;P05508	NADH-ubiquinone oxidoreductase chain 4	Mt-nd4;NADH4;ND4;Nd4;Mtnd4	0.0247195	-0.200173	ns	0.302015	0.202383	ns	unchanged	0.1028	-0.0953647	ns	0.902587	0.0151874	ns	unchanged
67	Q8SEZ0;Q06QK5;Q06QG6;Q06QA1;A0A096XKT9;P11661;A7XYD5;A7XYC1;A0A0A1FZN8	NADH-ubiquinone oxidoreductase chain 5	Mt-nd5;ND5;Mtnd5;Nd5	0.0406773	-0.286084	ns	0.293926	0.0656577	ns	unchanged	0.183166	-0.167318	ns	0.30886	-0.0544442	ns	unchanged
4636	P0DMW1;P0DMW0	Heat shock 70 kDa protein 1B;Heat shock 70 kDa protein 1A	Hspa1a	0.0112438	-0.227115	ns	4.6343e-08	0.180867	FDR1%	less deg	2.1532e-05	-0.383906	FDR1%	0.000141665	0.0829416	FDR1%	slower turnover
3698	F1M6D0		Mrps6	0.0200199	-0.178676	ns	0.760615	0.0810879	ns	unchanged	0.0276044	-0.215017	ns	0.031306	-0.0920327	ns	unchanged
1281	Q5I0K4;B0BN68		Mrps9	0.0980795	-0.0808382	ns	0.0330625	0.10974	ns	unchanged	0.141024	-0.107325	ns	0.189553	-0.0475858	ns	unchanged
3554	F1LWE6		Msi2	0.448841	-0.0577619	ns	0.20814	0.136924	ns	unchanged	0.00421089	-0.127797	ns	0.35258	-0.105885	ns	unchanged
1464	B2GV01;Q4FZS6		Mta2	0.0778934	-0.0525085	ns	0.126166	0.200137	ns	unchanged	0.856084	0.0555724	ns	0.293966	0.0844128	ns	unchanged
1137	A0A140UHX9;Q6AYE1		Ccz1b	0.80472	0.015746	ns	0.00197657	0.181006	FDR1%	less deg	0.284097	0.154971	ns	0.0995104	0.102174	ns	unchanged
4307	M0R8T1;A0A0G2JZE4;F1M7H7;Q4L1J4-2;Q4L1J4	Membrane-associated guanylate kinase, WW and PDZ domain-containing protein 1	Magi1	6.01129e-05	-0.228281	FDR1%	0.411498	-0.0151954	ns	less syn	1.06587e-10	-0.449326	FDR1%	0.117999	-0.0990549	ns	less syn
4848	P32551	Cytochrome b-c1 complex subunit 2, mitochondrial	Uqcrc2	0.00015204	-0.227271	FDR1%	0.28429	0.0121903	ns	less syn	0.0328468	-0.156345	ns	0.417384	-0.00812182	ns	unchanged
4724	P17256;M0R5W4	Mevalonate kinase	Mvk	0.38569	-0.0762363	ns	0.0359726	0.136386	ns	unchanged	0.339929	-0.378854	ns	0.0412736	0.171629	ns	unchanged
6169	Q62667;A0A140TAE0	Major vault protein	Mvp	0.292922	0.0439754	ns	0.642913	0.0621017	ns	unchanged	0.191487	0.0847018	ns	0.259883	-0.0254654	ns	unchanged
6381	Q66HF1	NADH-ubiquinone oxidoreductase 75 kDa subunit, mitochondrial	Ndufs1	2.59314e-10	-0.22727	FDR1%	0.580525	0.019185	ns	less syn	5.28396e-06	-0.190465	FDR1%	8.66406e-14	-0.0826687	FDR1%	less syn & more deg
4650	Q6P7A4;P10960;F7EPE0	Sulfated glycoprotein 1	Psap	0.364848	0.0327951	ns	7.57417e-11	0.181094	FDR1%	less deg	1.01811e-05	0.196289	FDR1%	5.6724e-14	0.209745	FDR1%	more syn & less deg
5460	Q498N3;Q9QUR2-2;Q9QUR2	Dynactin subunit 4	Dctn4	0.00303488	-0.143633	ns	7.33351e-06	0.181218	FDR1%	less deg	0.0544688	-0.0445105	ns	0.0627249	0.0898361	ns	unchanged
3858	Q68FQ5;F7FDM3		Mtif2	0.0273714	-0.230623	ns	0.725092	0.00564801	ns	unchanged	0.00536901	-0.220374	ns	0.119853	-0.067911	ns	unchanged
6299	Q641W2	UPF0160 protein MYG1, mitochondrial	Myg1	0.697196	-0.101395	ns	0.0205644	0.108122	ns	unchanged	0.560088	0.00879462	ns	0.0040271	0.177396	ns	unchanged
3451	F1LRL9;P15205;B0BNK3	Microtubule-associated protein 1B;MAP1B heavy chain;MAP1 light chain LC1	Map1b;Mtap1b	6.15664e-49	-0.282986	FDR1%	1.56605e-17	0.181291	FDR1%	slower turnover	0.726685	0.0315195	ns	0.337909	0.061153	ns	unchanged
243	D3ZKK5;A0A0G2JUZ0		Mtmr1	0.0595596	-0.289408	ns	0.644947	0.00147977	ns	unchanged	0.949467	0.0607314	ns	0.137444	0.124769	ns	unchanged
781	A0A0G2K6J5;B2GV99;Q64119;A0A0G2JWE1	Myosin light polypeptide 6	Myl6	0.128053	-0.136024	ns	0.0733037	0.129962	ns	unchanged	0.224705	-0.0279925	ns	0.0148118	0.113452	ns	unchanged
1900	D3ZA31		Mtmr2	0.134794	-0.170722	ns	0.135986	0.0594931	ns	unchanged	0.313281	-0.0703011	ns	0.000126599	0.14236	FDR1%	less deg
2986	D4A7J8		Prpf4	0.114694	-0.115506	ns	0.000637448	0.181353	FDR1%	less deg	0.17748	-0.0444058	ns	0.723729	-0.00252781	ns	unchanged
575	A0A0G2K1P1;D3ZTB0		Mtmr7	0.300003	-0.127035	ns	0.00622251	0.270438	ns	unchanged	0.00479364	-0.186337	ns	0.853837	-0.0612842	ns	unchanged
6237	Q63355	Unconventional myosin-Ic	Myo1c	0.0799423	-0.0985659	ns	0.0591491	0.0882173	ns	unchanged	0.00970901	-0.234685	ns	0.218988	0.0615638	ns	unchanged
4714	P15999;F1LP05	ATP synthase subunit alpha, mitochondrial;ATP synthase subunit alpha	Atp5a1	1.27971e-05	-0.226625	FDR1%	0.0748381	0.0113814	ns	less syn	0.00138805	-0.154231	FDR1%	0.176255	-0.00360115	ns	less syn
4661	P11507;P11507-2;Q71UZ2;Q63080	Disco-interacting protein 2 homolog B	Atp2a2	1.98698e-22	-0.226297	FDR1%	0.480493	-0.129002	ns	less syn	1.58505e-08	-0.145219	FDR1%	1.40437e-09	0.205094	FDR1%	slower turnover
5394	Q3KR59	Ubiquitin carboxyl-terminal hydrolase 10	Usp10	0.0572002	-0.122965	ns	0.000435615	0.18175	FDR1%	less deg	0.000227172	-0.146137	FDR1%	0.317194	-0.115483	ns	less syn
937	A0A0G2K9Q3;Q6QI44	N-alpha-acetyltransferase 25, NatB auxiliary subunit	Naa25	0.0108998	-0.236667	ns	0.0143671	0.0628658	ns	unchanged	0.473807	0.00204839	ns	0.123119	-0.134281	ns	unchanged
207	Q4KLN2;A0A0G2JU49;B0BN02		Mtx1	0.222202	-0.11025	ns	0.0507015	0.0575662	ns	unchanged	0.0316818	-0.153087	ns	0.408635	0.00113573	ns	unchanged
5971	Q5U1Z9		Mtx2	0.215547	-0.192668	ns	0.945143	-0.0123028	ns	unchanged	0.0115122	-0.241978	ns	0.982412	-0.000517153	ns	unchanged
5328	Q1HCL7;A0A096MKG5	NAD kinase 2, mitochondrial	Nadk2	0.598503	0.0474837	ns	0.410181	0.00412899	ns	unchanged	0.373947	0.021414	ns	0.66558	-0.0394551	ns	unchanged
2320	D3ZNK1		Mtx3	0.413194	-0.153814	ns	0.210344	-0.0557027	ns	unchanged	0.641998	0.0648768	ns	0.437024	0.0659489	ns	unchanged
5175	P81799	N-acetyl-D-glucosamine kinase	Nagk	0.392867	-0.0609503	ns	0.148523	0.134196	ns	unchanged	0.0556918	-0.0419602	ns	0.593824	0.120431	ns	unchanged
2233	D3ZKG1		Mut	0.00900663	-0.216334	ns	0.116698	0.0912368	ns	unchanged	0.0634171	-0.128138	ns	0.198618	-0.0882537	ns	unchanged
6841	Q80Z29;A0A0G2K0I3	Nicotinamide phosphoribosyltransferase	Nampt	0.850736	-0.0144546	ns	0.00884128	0.151468	ns	unchanged	0.00117762	-0.32986	FDR1%	0.000315723	0.114796	FDR1%	slower turnover
2965	D4A732		Mvb12b	0.150178	-0.0920937	ns	0.0142004	0.17001	ns	unchanged	0.393699	0.0628611	ns	0.285717	0.1281	ns	unchanged
3917	Q6P769;G3V6H9;Q9Z2G8	Nucleosome assembly protein 1-like 1	Nap1l1	0.0971019	-0.0702219	ns	0.400684	0.0401276	ns	unchanged	0.782721	-0.0503494	ns	0.61362	0.0500289	ns	unchanged
[truncated: 1,714 more rows]
