# Supplementary material for: Proteome dynamics during homeostatic scaling in cultured neurons
Source: eLife. 2020 Apr 2;9:e52939. doi: 10.7554/eLife.52939 (PMC7117909; doi:10.7554/eLife.52939)
Supplement: Figure 4—source data 1. [file elife-52939-fig4-data1.xlsx]

## Sheet: Sheet1
Figure 4 – Source Data 1: Synaptic protein regulation during homeostatic down-scaling.
Proteins	Protein name	Gene name	Short name in Figure 4	Regulation BIC vs Ctrl	Regulation TTX vs Ctrl
A0A0G2K9A2;P85970;A0A0G2K905;A0A0G2K2J1;A0A0G2K1V8	Actin-related protein 2/3 complex subunit 2	Arpc2	Arpc2	less syn	less deg
Q5M7T6		Atp6v0d1	v-type proton ATPase	less syn	less deg
D4A055-1;D4A055		Cacnb4	Cacnb4	less syn	less deg
F8WFS9;Q05764;Q05764-2	Beta-adducin	Add2	Add2	less syn	less syn
E1AW38;Q02294;O89089;F1LQ87;F1LRE0;Q6XS93;Q6XS92	Voltage-dependent N-type calcium channel subunit alpha-1B	Cacna1b	Cacna1b	less syn & more deg	less deg
A0A0G2JT63;D3ZX82		Cyfip2	Cyfip2	less syn	less deg
P31016;A0A0G2K7F5;P97630	Disks large homolog 4	Dlg4	PSD-95	less syn	less deg
G3V7T8;P97838-2;P97838	Disks large-associated protein 3	Dlgap3	DAP-3	less syn	less deg
F1M3W5		Dmxl2	Dmxl2	less syn	less deg
Q5BJ93;M0R5J4;P04764;Q5EB49;A0A0G2K4Y2	Alpha-enolase	Eno1	Eno1	less syn	less deg
P07323	Gamma-enolase	Eno2	Eno2	less syn	less deg
B2CZC8;P31424;P31424-2;A0A0H2UHN1;A0A0H2UHW6	Metabotropic glutamate receptor 5	Grm5	mGluR5	less syn	less deg
P62168	Neuronal calcium sensor 1	Ncs1	NCS1	less syn	less deg
O55173	3-phosphoinositide-dependent protein kinase 1	Pdpk1	Pdpk1	less syn	less deg
Q91Z79;F1LSE6	Liprin-alpha-3	Ppfia3	Liprin-α3	less syn	less deg
F1LPP6;P24587	A-kinase anchor protein 5	Akap5	Akap5	less syn & more deg	less syn
F1LR60;O35430-2;O35430	Amyloid beta A4 precursor protein-binding family A member 1	Apba1	Apba1	less syn	less syn
F1LMH0;Q9WU34;Q9WU34-3;Q9WU34-2	Neuronal-specific septin-3	Sept3	Sept3	less syn	less deg
Q925Q9;M0RBZ7;Q6IRL5;A0A0H2UHD8;Q925Q9-2;Q925Q9-7;Q925Q9-3;Q925Q9-6;Q925Q9-4;F1LRS8	SH3 domain-containing kinase-binding protein 1;CD2-associated protein	Sh3kbp1;Cd2ap	Sh3kbp1	less syn	less deg
A0A0G2JSJ3;A0A0G2JVB0;Q07647;A0A0G2JX37;Q6P506	Solute carrier family 2, facilitated glucose transporter member 3	Slc2a3	GLUT3	less syn	less deg
A0A0G2K624;A0A0H2UI28;P23363;Q99NV7;C8CEB1	Brain-derived neurotrophic factor	Bdnf	BDNF	more syn & less deg	NA
P37377;P37377-2	Alpha-synuclein	Snca	SNCA	less syn	less deg
Q68FS2	COP9 signalosome complex subunit 4	Cops4	Cops4	less deg	less deg
P46933-2;P46933;A0A0G2K3S1	Amyloid beta A4 precursor protein-binding family B member 1	Apbb1	Apbb1	less syn	less syn
Q9WUD9-2;Q9WUD9	Proto-oncogene tyrosine-protein kinase Src	Src	Src	less syn	less deg
P06685;Q64608	Sodium/potassium-transporting ATPase subunit alpha-1	Atp1a1	Atp1a1	less syn	less syn
Q9QXY2-2;Q9QXY2	SRC kinase signaling inhibitor 1	Srcin1	SNIP	less syn	less deg
P07825;A0A0G2KAD8	Synaptophysin	Syp	SYP	less syn	less deg
Q9ERH3;Q9ERH3-2	WD repeat-containing protein 7	Wdr7	Wdr7	less syn	less deg
P63102;A0A0G2JV65	14-3-3 protein zeta/delta	Ywhaz	Ywhaz	less syn	less deg
P52481	Adenylyl cyclase-associated protein 2	Cap2	Cap2	slower turnover	less syn
G3V803;Q9Z1Y3;Q9JIV7	Cadherin-2	Cdh2	Cdh2	less syn	less syn
Q9Z1T4;Q9Z1T4-2	Connector enhancer of kinase suppressor of ras 2	Cnksr2	Cnksr2	less syn	less syn
A0A0G2JT93;Q9WU82;B6DMG1	Catenin beta-1	Ctnnb1	CTNN-B1	less syn	less syn
Q62936;A0A096MJ42;Q62936-2;A0A0G2K0Y9;A0A096MJR5	Disks large homolog 3	Dlg3	SAP-102	less syn	less syn
G3V927;P97839	Disks large-associated protein 4	Dlgap4	DAP-4	less syn	less syn
D3ZMI4;A0A0G2K0F3;Q9WTP0-2;D4A9L5;Q9WTP0;A0A0G2K0B2;D4ACZ4	Band 4.1-like protein 1	Epb41l1	Epb41l1	less syn	less syn
Q6MFX8;Q924M0;Q9Z0U4-2;Q9Z0U4;Q5CC44;Q5CC43;B5D5S8;Q920D8;A0A0G2JUQ1;Q9Z0U4-3;Q9Z0U4-4;Q9Z0U4-5;Q719L2	Gamma-aminobutyric acid type B receptor subunit 1	Gabbr1	GABA-BR1	slower turnover	less syn
Q9QYF3	Unconventional myosin-Va	Myo5a	Myo5a	slower turnover	less deg
P19969	Gamma-aminobutyric acid receptor subunit alpha-5	Gabra5	GABAA-α5	less syn	less syn
P15431	Gamma-aminobutyric acid receptor subunit beta-1	Gabrb1	GABAA-β1	less syn	less syn
P19491;P19491-2;P19491-3;G3V914;F1LNE4	Glutamate receptor 2	Gria2	GluA2	slower turnover	less syn
P19492;P19492-2;G3V6Z5;G3V8Y9	Glutamate receptor 3	Gria3	GluA3	less syn	less syn
A0A0G2K1Q9;Q9JMB3;A3E0T0		Epb41l3	Epb41l3	more deg	unchanged
Q9Z214;A0A0H2UI35;Q9Z214-2;Q9Z214-3;Q811R0;Q811R1;A0A0G2JYD5	Homer protein homolog 1	Homer1	Homer1	less syn & more deg	less syn
P51111;G3V9P7;Q6RW62		Htt	Htt	less syn	less syn
F1LPA3;Q76M68	IQ motif and SEC7 domain-containing protein 3	Iqsec3	Iqsec3	less syn	less syn
A0A0G2JSK5;P49134	Integrin beta-1	Itgb1	Itgb1	more syn	less syn
P31044	Phosphatidylethanolamine-binding protein 1;Hippocampal cholinergic neurostimulating peptide	Pebp1	Pebp1	less deg	less deg
P62483;A0A0G2K670	Voltage-gated potassium channel subunit beta-2	Kcnab2	Kcnab2	less syn	less syn
Q8K4Y5	Leucine-rich glioma-inactivated protein 1	Lgi1	Lgi1	less syn	less syn
P70587-2;F1M4K6;P70587-3;P70587;P70587-5;P70587-4;A0A0A0MXW8;F1LMG7;B8Q4H4;B8Q4H5;B8Q4H3;B8Q4F8;B8Q4G6;B8Q4H0;B8Q4G8;B8Q4G3;B8Q4G4;B8Q4G9;B8Q4G5;B8Q4G2;B8Q4F9;B8Q4H1;B8Q4G1;B8Q4G0;B8Q4H2;B8Q4G7	Leucine-rich repeat-containing protein 7	Lrrc7	Densin	less syn	less syn
A0A0G2KA27;O08873	MAP kinase-activating death domain protein	Madd	Madd	less syn	less syn
P62963	Profilin-1	Pfn1	Profilin-1	slower turnover	less deg
Q62888;F1LQ41;A0A0U1RRX0;Q62888-2	Neuroligin-2	Nlgn2	NLGN2	less syn	less syn
P97546;P97546-3;P97546-1	Neuroplastin	Nptn	Neuroplastin	slower turnover	less syn
Q63372;Q63372-1;Q63372-3;Q63372-4;Q63372-5;Q63372-6;Q63372-7;Q63372-8;Q63372-9;Q63372-10;Q63372-11;Q63372-12;Q63372-13;Q63373;Q63373-2;Q63373-3;Q63373-4;M0RBN6;A0A0U1RRR4	Neurexin-1;Neurexin-1-beta	Nrxn1	NRXN1	less syn	less syn & more deg
D3ZE55-2;D3ZE55	Protocadherin-8	Pcdh8	Pcdh8	more syn & less deg	less syn
Q9JKS6;Q9JKS6-3;Q9JKS6-2	Protein piccolo	Pclo	Piccolo	less syn	less syn
F1M7V4;D3Z9C7		Pclo	Piccolo	less syn	less syn
Q99M64	Phosphatidylinositol 4-kinase type 2-alpha	Pi4k2a	Pi4k2a	less deg	less syn
O35509;A0A0G2JZR4	Ras-related protein Rab-11B	Rab11b	Rab11b	slower turnover	less syn
P63319	Protein kinase C gamma type	Prkcg	PKC	slower turnover	less deg
P63012	Ras-related protein Rab-3A	Rab3a	Rab3a	less syn	less syn
Q63941;Q6P9W6;Q9QYT8	Ras-related protein Rab-3B	Rab3b	Rab3b	less syn	less syn
P14562;A0A0U1RRS9	Lysosome-associated membrane glycoprotein 1	Lamp1	Lamp1	less deg	more syn & less deg
P62824	Ras-related protein Rab-3C	Rab3c	Rab3c	less syn	less syn
D3KR63;F1LQ26;Q9Z1C7	Rap guanine nucleotide exchange factor 4	Rapgef4	Rapgef4	less syn	less syn
B5DFG5;A0A0U1RRT8;A0A0U1RRW2;A0A0U1RRQ5;A0A0U1RS01		Sept6	Sept6	more deg	less deg
G3V9H1;D4AB55;O08774;A0A0G2K326;O08774-2	Regulator of G-protein signaling 12	Rgs12	Rgs12	less syn & more deg	less syn
D3ZDH8;Q9JJM9-2	Septin-5	Sept5	Sept5	less syn	less syn
A0A0G2KAW2;Q5JCS7;O35412;F1LS65;A0A0G2K2Z9;D3ZQP5	Signal-induced proliferation-associated 1-like protein 1	Sipa1l1	Sipa1l1	less syn	less syn & more deg
Q6QIX3;Q6QIX3-2	Zinc transporter 3	Slc30a3	ZnT-3	less syn	less syn
O35458	Vesicular inhibitory amino acid transporter	Slc32a1	rGVAT	more deg	less syn
D3ZZK3	Receptor protein-tyrosine kinase	Epha4	Epha4	less syn	more syn
D3ZE85	DOMON domain-containing protein FRRS1L	Frrs1l	Frrs1l	less syn	more syn
P19490;P19490-2	Glutamate receptor 1	Gria1	GluA1	less syn	more syn
F1LQ81;A0A0G2K6U1;Q9QUL6;O88960;O88975	Vesicle-fusing ATPase	Nsf	NSF	slower turnover	slower turnover
P60881;F8WG75	Synaptosomal-associated protein 25;Synaptosomal-associated protein	Snap25	Snap25	less syn	less syn
P0CC10	Leucine-rich repeat-containing protein 4B	Lrrc4b	NLG-3	less syn	more syn
A0A0G2JU11;F1M386;A0A0A0MP77	Rap guanine nucleotide exchange factor 2	Rapgef2	Rapgef2	less syn	more syn
Q62747-2;Q62747-3;Q62747-5;Q62747-8;Q62747-4;Q62747-6;Q62747-7;Q62747		Syt7	Syt7	less syn	more syn
Q9JHW5	Vesicle-associated membrane protein 7	Vamp7	Vamp7	less syn	more syn
Q6GMN2-2;Q6GMN2	Brain-specific angiogenesis inhibitor 1-associated protein 2	Baiap2	Baiap2	less syn	more syn & less deg
P11275;F1LZG4;A0A0G2JUV8;Q924T0	Calcium/calmodulin-dependent protein kinase type II subunit alpha	Camk2a	Camk2a	less syn	more syn & less deg
Q9Z2X5;Q6IRH2	Homer protein homolog 3	Homer3	Homer3	less syn	more syn & less deg
Q02563	Synaptic vesicle glycoprotein 2A	Sv2a	Sv2a	less syn	less syn
Q63475	Receptor-type tyrosine-protein phosphatase N2	Ptprn2	Ptprn2	less syn	more syn & less deg
Q62634;Q62634-2	Vesicular glutamate transporter 1	Slc17a7	vGlut1	less syn	more syn & less deg
P29066	Beta-arrestin-1	Arrb1	Arrb1	less deg	unchanged
Q63564	Synaptic vesicle glycoprotein 2B	Sv2b	Sv2b	less syn	more syn & less deg
P47861	Synaptotagmin-5	Syt5	Syt5	less syn	more syn & less deg
Q9WU70-2;Q9WU70;Q9WU70-3	Syntaxin-binding protein 5	Stxbp5	Stxbp5	slower turnover	less deg
G3V8G4;P55068;P55068-2;A0A0G2JYH8	Brevican core protein	Bcan	Bcan	less deg	unchanged
P51792-2;P51792;A0A0G2K2K6	H(+)/Cl(-) exchange transporter 3	Clcn3	Clcn3	less deg	unchanged
A0A0G2JZS5;Q7TS62;P53563-3;P53563;Q9WUI5;Q548R7;E9PU78;P53563-2;Q5K547	Bcl-2-like protein 1	Bcl2l1;Bcl2l1-ps1;bcl-X	Bcl2l1	less syn	NA
D4ABK1		Syngr3	Syngr3	less syn	less syn
M0R531;O88407	Protein lifeguard 2	Faim2	Protein lifeguard 2	less syn	NA
B0VXR5;Q9R237-2;Q9R237;Q9R237-3	C-Jun-amino-terminal kinase-interacting protein 1	Mapk8ip1	Mapk8ip1	less syn	NA
Q3ZB97;P62944;P62944-2	AP complex subunit beta;AP-2 complex subunit beta	Ap2b1	AP2B	less syn	slower turnover
P06687	Sodium/potassium-transporting ATPase subunit alpha-3	Atp1a3	Atp1a3	less syn	slower turnover
A0A0A0MY16;Q1WIM2-2;Q1WIM2;A0A0G2K5U6	Cell adhesion molecule 2	Cadm2	CADM2	less syn	slower turnover
M0R7K1;F1LQV9		Lin7a	Lin7a	less syn	slower turnover
F1LPB9;P47709;A0A0G2K8B5;P70610	Rabphilin-3A;Double C2-like domain-containing protein beta	Rph3a;Doc2b	Rph3a	less syn	slower turnover
P61265	Syntaxin-1B	Stx1b	Stx1b	less syn	slower turnover
Q4KM69;F7EUU4		Cops5	Cops5	less deg	unchanged
Q9Z2L0	Voltage-dependent anion-selective channel protein 1	Vdac1	Vdac1	slower turnover	less deg
Q63259	Receptor-type tyrosine-protein phosphatase-like N	Ptprn	Ptprn	more syn	unchanged
Q62768-2;Q62768-3;Q62768	Protein unc-13 homolog A	Unc13a	Munc13-1	less syn	slower turnover
O35431	Amyloid beta A4 precursor protein-binding family A member 2	Apba2	Apba2	slower turnover	unchanged
B1VKB4;Q9Z327-3;Q9Z327-2;A0A0H2UHQ9;Q9Z327	Synaptopodin	Synpo	Synpo	less syn & more deg	less syn
A2VD09;Q9QZM5	Abl interactor 1	Abi1	Abi1	less syn	unchanged
A0A0G2K1C0;Q4V7C7;Q9ERF9	Actin-related protein 3	Actr3	ACTR3	less syn	unchanged
P21707;Q707P0	Synaptotagmin-1	Syt1	Syt1	less syn	less syn
A0A1B0GWY5;A0A0G2K0V4;Q5FVC2;A0A1B0GWX6;A0A1B0GWW1	Rho guanine nucleotide exchange factor 2	Arhgef2	Arhgef2	less syn	unchanged
A0A0H2UHI7;Q505J9	ATPase family AAA domain-containing protein 1	Atad1	Atad1	less syn	unchanged
Q1M168	Caytaxin	Atcay	Caytaxin	less syn	unchanged
G3V984;A0A0G2K1X6		Bsn	Bassoon	less syn	unchanged
F1M7K7;Q8VHW5	Voltage-dependent calcium channel gamma subunit;Voltage-dependent calcium channel gamma-8 subunit	Cacng8	TARP-γ8	less syn	unchanged
P97610	Synaptotagmin-12	Syt12	Syt12	less syn	less syn
F2W8B0;P22734-2;P22734	Catechol O-methyltransferase	Comt	Comt	less syn	unchanged
A0A0G2K3Y6;D3ZKL3		Cpeb4	Cpeb4	less syn	unchanged
Q62807;A0A0G2K9H6;A0A0U1RRV6;A0A0U1RRS2	Synaptotagmin-17	Syt17	Syt17	less syn	less syn
P31662	Sodium-dependent neutral amino acid transporter SLC6A17	Slc6a17	Slc6a17	more syn	slower turnover
P84087	Complexin-2	Cplx2	CPX2	less syn	unchanged
F1LN46;Q3KR63	Carnitine O-palmitoyltransferase 1, brain isoform	Cpt1c	CPT1C	less syn	unchanged
F1M787;O35116	Catenin delta-2	Ctnnd2	CTNN-D2	less syn	unchanged
F1MA36;Q9QWN8	Spectrin beta chain, non-erythrocytic 2	Sptbn2	Sptbn2	less syn & more deg	slower turnover
A0A0G2JY26;D4A0I5		Dnajc6	Dnajc6	less syn	unchanged
F1LMU7;F1LNE8;P23576	Gamma-aminobutyric acid receptor subunit alpha-2	Gabra2	GABAA-α2	less syn	unchanged
Q9Z272;A0A0G2K527	ARF GTPase-activating protein GIT1	Git1	Git1	less syn	unchanged
Q62844;A0A096MKC5;A0A0G2K2E3;A0A096MKC1	Tyrosine-protein kinase Fyn;Non-specific protein-tyrosine kinase	Fyn	Fyn	less deg	unchanged
Q9R1K2;Q9R1K2-2;A0A096P6L6;Q9R1K2-4;Q9R1K2-3	Teneurin-2;Ten-2, soluble form;Ten-2 intracellular domain	Tenm2	Tenm2	slower turnover	less syn
P42260;F1M855	Glutamate receptor ionotropic, kainate 2	Grik2	GluK2	less syn	unchanged
G3V746;Q00960	Glutamate receptor ionotropic, NMDA 2B	Grin2b	GluN2B	less syn	unchanged
Q6AZ05;Q63054;A0A0H2UHX6;Q6RUG5	Islet cell autoantigen 1;Islet cell autoantigen 1-like protein	Ica1;Ica1l	Ica1	less deg	unchanged
P63142	Potassium voltage-gated channel subfamily A member 2	Kcna2	Kcna2	less syn	unchanged
Q9Z252	Protein lin-7 homolog B	Lin7b	Lin7b	less syn	unchanged
F1LN69;A0A0G2JV77;A0A0G2K382;F1LP90;Q5EB61;Q3SYQ1	Misshapen-like kinase 1	Mink1;LOC303259	Mink1	less syn	unchanged
Q62824;M0R649;M0RBF8	Exocyst complex component 4	Exoc4	Exoc4	slower turnover	unchanged
F1LNP8;A0A1L1WKJ6;Q9WTY6		Nectin1	Nectin1	less syn	unchanged
D3ZDC0;F1LPZ8;Q62889-2;Q62889-4;Q62889-3;Q62889;A0A096MK63	Neuroligin-3	Nlgn3	NLGN3	less syn	unchanged
Q63374;Q63374-2;Q63374-3;Q63374-4;Q63374-5;Q63374-6;Q63374-7;Q63374-8;Q63374-9;Q63374-10;D3ZAD6;D3ZTM0	Neurexin-2	Nrxn2	NRXN2	less syn	unchanged
D3ZWV8		Tiam1	Tiam1	less syn	less syn
Q07310-3;Q07310-17;Q07310;Q07310-19;Q07310-18;Q07310-8;Q07310-6;Q07310-5;Q07310-4;Q07310-2;Q07310-14;Q07310-13;Q07310-12;Q07310-11;Q07310-16;Q07310-15;Q07310-10;Q07310-9	Neurexin-3	Nrxn3	NRXN3	less syn	unchanged
Q920Q0	Paralemmin-1	Palm	PALM	less syn	unchanged
P11506;P11506-14	Plasma membrane calcium-transporting ATPase 2	Atp2b2	Atp2b2	less syn & more deg	unchanged
F1M863;Q91Z80;Q562A3	Liprin-alpha-4	Ppfia4	Liprin-α4	less syn	unchanged
P63018;M0RCB1;D4A4S3;M0R8M9;F1LZI1	Heat shock cognate 71 kDa protein	Hspa8;LOC102549957;LOC680121	Hspa8	slower turnover	unchanged
O70441;A0A096MIT7	Synapsin-3	Syn3	Syn3	more deg	unchanged
O54857		Pten	Pten	less deg	unchanged
O35867	Neurabin-1	Ppp1r9a	Neurabin-1	less syn	unchanged
O35274;B1H262	Neurabin-2	Ppp1r9b	Neurabin-2	less syn	unchanged
P63331;A0A0G2JYA4	Serine/threonine-protein phosphatase 2A catalytic subunit alpha isoform	Ppp2ca	Ppp2ca	less syn	unchanged
Q91ZY8	E3 ubiquitin-protein ligase TRIM9	Trim9	Trim9	less deg	less syn
P70600-3;P70600	Protein-tyrosine kinase 2-beta	Ptk2b	Ptk2b	slower turnover	more syn & less deg
Q761X5;A0A0G2JTK0;F1LM73;F1LNE2;O08722	Netrin receptor UNC5C;Netrin receptor UNC5B	Unc5c;Unc5b	Unc5B/C	less syn	less syn
F1LRL9;P15205;B0BNK3	Microtubule-associated protein 1B;MAP1B heavy chain;MAP1 light chain LC1	Map1b;Mtap1b	Map1b	slower turnover	unchanged
Q6MG82	Proline-rich transmembrane protein 1	Prrt1	Prrt1	less syn	unchanged
A0A0G2K999;D3ZDA6		Sdk2	SDK-2	less syn	unchanged
P60192;Q4KM25	SNARE-associated protein Snapin	Snapin	Snapin	less deg	unchanged
F1LPM3;O35413	Sorbin and SH3 domain-containing protein 2	Sorbs2	Sorbs2	less deg	unchanged
Q6P6S0	Synaptosomal-associated protein 47	Snap47	Snap47	less syn	unchanged
B5DF41	Syntaphilin	Snph	Snph	less syn	unchanged
A0A0G2K5X6;Q63604;Q63604-3;Q63604-2;Q7TSD7	BDNF/NT-3 growth factors receptor	Ntrk2	TrkB	slower turnover	unchanged
P63281;A0A0G2KB55	SUMO-conjugating enzyme UBC9	Ube2i	Ube2i	less deg	unchanged
G3V6S0;Q6XD99;A0A0G2K8W9	Spectrin beta chain	Sptbn1	Sptbn1	less syn	unchanged
D4A208;A0A0G2JZ92;B5DEJ1	SLIT-ROBO Rho GTPase-activating protein 2	Srgap2	Srgap2	less syn	unchanged
Q5U2N2;A0A0G2JVV5	Ubiquitin carboxyl-terminal hydrolase	Usp14	Usp14	less deg	unchanged
Q9Z2I7;A0A0G2JZX3	Synaptic vesicle 2-related protein	Svop	Svop	less syn	unchanged
A0A0G2JSR2;B1AC44;P40748;Q5M8A7	Synaptotagmin-3	Syt3	Syt3	less syn	unchanged
P81155	Voltage-dependent anion-selective channel protein 2	Vdac2	Vdac2	slower turnover	unchanged
G3V8A5;B5DFC1		Vps35	Vps35	slower turnover	unchanged
A8WCF8;A0A0G2K272	Tumor protein p63-regulated gene 1-like protein	Tprg1l	Tprg1l	less syn	unchanged
F1LNC4;P58200	Vesicle transport through interaction with t-SNAREs homolog 1B	Vti1b	Vti1b	less syn	unchanged
D4ABN3;Q62910-2;Q62910;Q62910-5;Q62910-4;Q62910-3;Q62910-6;F1LZU2	Synaptojanin-1	Synj1;4933427I04Rik	Synj1	slower turnover	more syn & less deg
Q5BJU7	Wiskott-Aldrich syndrome protein family member 1	Wasf1	WAVE1	less syn	unchanged
