# Supplementary material for: Proteome dynamics during homeostatic scaling in cultured neurons
Source: eLife. 2020 Apr 2;9:e52939. doi: 10.7554/eLife.52939 (PMC7117909; doi:10.7554/eLife.52939)
Supplement: Figure 5—source data 1. [file elife-52939-fig5-data1.xlsx]

## Sheet: Sheet1
Figure 5 – Source Data 1: Synaptic protein regulation during homeostatic up-scaling.
Proteins	Protein name	Gene name	Short name in Figure 5	Regulation TTX vs Ctrl	Regulation BIC vs Ctrl
A0A0G2K9A2;P85970;A0A0G2K905;A0A0G2K2J1;A0A0G2K1V8	Actin-related protein 2/3 complex subunit 2	Arpc2	Arpc2	less deg	less syn
Q5M7T6		Atp6v0d1	v-type proton ATPase	less deg	less syn
D4A055-1;D4A055		Cacnb4	Cacnb4	less deg	less syn
F8WFS9;Q05764;Q05764-2	Beta-adducin	Add2	Add2	less syn	less syn
E1AW38;Q02294;O89089;F1LQ87;F1LRE0;Q6XS93;Q6XS92	Voltage-dependent N-type calcium channel subunit alpha-1B	Cacna1b	Cacna1b	less deg	less syn & more deg
D4A9M6;O88884;F1LMK0;O88884-2	A-kinase anchor protein 1, mitochondrial	Akap1	Akap1	less syn	unchanged
A0A0G2JT63;D3ZX82		Cyfip2	Cyfip2	less deg	less syn
P31016;A0A0G2K7F5;P97630	Disks large homolog 4	Dlg4	PSD-95	less deg	less syn
G3V7T8;P97838-2;P97838	Disks large-associated protein 3	Dlgap3	DAP-3	less deg	less syn
F1M3W5		Dmxl2	Dmxl2	less deg	less syn
Q5BJ93;M0R5J4;P04764;Q5EB49;A0A0G2K4Y2	Alpha-enolase	Eno1	Eno1	less deg	less syn
P07323	Gamma-enolase	Eno2	Eno2	less deg	less syn
B2CZC8;P31424;P31424-2;A0A0H2UHN1;A0A0H2UHW6	Metabotropic glutamate receptor 5	Grm5	mGluR5	less deg	less syn
P62168	Neuronal calcium sensor 1	Ncs1	NCS1	less deg	less syn
O55173	3-phosphoinositide-dependent protein kinase 1	Pdpk1	Pdpk1	less deg	less syn
Q91Z79;F1LSE6	Liprin-alpha-3	Ppfia3	Liprin-α3	less deg	less syn
F1LPP6;P24587	A-kinase anchor protein 5	Akap5	Akap5	less syn	less syn & more deg
D3Z9Z0		Ank1	Ank1	less syn	unchanged
F1LR60;O35430-2;O35430	Amyloid beta A4 precursor protein-binding family A member 1	Apba1	Apba1	less syn	less syn
F1LMH0;Q9WU34;Q9WU34-3;Q9WU34-2	Neuronal-specific septin-3	Sept3	Sept3	less deg	less syn
F1LUE2;G3V9G3;P08413;Q9Z2F1	Calcium/calmodulin-dependent protein kinase type II subunit beta	Camk2g;Camk2b	Camk2b/g	less deg	unchanged
Q925Q9;M0RBZ7;Q6IRL5;A0A0H2UHD8;Q925Q9-2;Q925Q9-7;Q925Q9-3;Q925Q9-6;Q925Q9-4;F1LRS8	SH3 domain-containing kinase-binding protein 1;CD2-associated protein	Sh3kbp1;Cd2ap	Sh3kbp1	less deg	less syn
A0A0G2JSJ3;A0A0G2JVB0;Q07647;A0A0G2JX37;Q6P506	Solute carrier family 2, facilitated glucose transporter member 3	Slc2a3	GLUT3	less deg	less syn
P37377;P37377-2	Alpha-synuclein	Snca	SNCA	less deg	less syn
Q68FS2	COP9 signalosome complex subunit 4	Cops4	Cops4	less deg	less deg
P46933-2;P46933;A0A0G2K3S1	Amyloid beta A4 precursor protein-binding family B member 1	Apbb1	Apbb1	less syn	less syn
Q9WUD9-2;Q9WUD9	Proto-oncogene tyrosine-protein kinase Src	Src	Src	less deg	less syn
P06685;Q64608	Sodium/potassium-transporting ATPase subunit alpha-1	Atp1a1	Atp1a1	less syn	less syn
Q9QXY2-2;Q9QXY2	SRC kinase signaling inhibitor 1	Srcin1	SNIP	less deg	less syn
P07825;A0A0G2KAD8	Synaptophysin	Syp	SYP	less deg	less syn
Q9ERH3;Q9ERH3-2	WD repeat-containing protein 7	Wdr7	Wdr7	less deg	less syn
P63102;A0A0G2JV65	14-3-3 protein zeta/delta	Ywhaz	Ywhaz	less deg	less syn
P06686	Sodium/potassium-transporting ATPase subunit alpha-2	Atp1a2	Atp1a2	less syn & more deg	unchanged
Q62717	Calcium-dependent secretion activator 1	Cadps	Cadps	less syn	unchanged
P52481	Adenylyl cyclase-associated protein 2	Cap2	Cap2	less syn	slower turnover
G3V803;Q9Z1Y3;Q9JIV7	Cadherin-2	Cdh2	Cdh2	less syn	less syn
G3V7J1;Q8R553	Calsyntenin-3	Clstn3	Clstn3	less syn	unchanged
G3V849;P97836	Disks large-associated protein 1	Dlgap1	DAP-1	less deg	NA
P08082;P08082-2	Clathrin light chain B	Cltb	Cltb	less syn	unchanged
Q9Z1T4;Q9Z1T4-2	Connector enhancer of kinase suppressor of ras 2	Cnksr2	Cnksr2	less syn	less syn
F1M3J7;A0A0G2K6L9		Cntnap4	Cntnap4	less syn	unchanged
A0A0G2JT93;Q9WU82;B6DMG1	Catenin beta-1	Ctnnb1	CTNN-B1	less syn	less syn
Q62936;A0A096MJ42;Q62936-2;A0A0G2K0Y9;A0A096MJR5	Disks large homolog 3	Dlg3	SAP-102	less syn	less syn
G3V927;P97839	Disks large-associated protein 4	Dlgap4	DAP-4	less syn	less syn
D3ZZ44		Elfn1	Elfn1	less syn	NA
D3ZMI4;A0A0G2K0F3;Q9WTP0-2;D4A9L5;Q9WTP0;A0A0G2K0B2;D4ACZ4	Band 4.1-like protein 1	Epb41l1	Epb41l1	less syn	less syn
F1M3L7	Epidermal growth factor receptor kinase substrate 8	Eps8	Eps8	less syn	unchanged
Q6MFX8;Q924M0;Q9Z0U4-2;Q9Z0U4;Q5CC44;Q5CC43;B5D5S8;Q920D8;A0A0G2JUQ1;Q9Z0U4-3;Q9Z0U4-4;Q9Z0U4-5;Q719L2	Gamma-aminobutyric acid type B receptor subunit 1	Gabbr1	GABA-BR1	less syn	slower turnover
D4A559;B2GUY4		Dmtn	Dmtn	less deg	unchanged
P60905;A0A0G2JX56	DnaJ homolog subfamily C member 5	Dnajc5	Dnajc5	less deg	unchanged
P39052;P39052-2;P39052-3;P39052-4;A0A0A0MY48;A0A0A0MY49	Dynamin-2	Dnm2	Dnm2	less deg	unchanged
P62813	Gamma-aminobutyric acid receptor subunit alpha-1	Gabra1	GABAA-α5	less syn	unchanged
F1LNZ5;P20236	Gamma-aminobutyric acid receptor subunit alpha-3	Gabra3	GABAA-α3	less syn	NA
P07936	Neuromodulin	Gap43	Gap43	less deg	unchanged
Q9QYF3	Unconventional myosin-Va	Myo5a	Myo5a	less deg	slower turnover
P19969	Gamma-aminobutyric acid receptor subunit alpha-5	Gabra5	GABAA-α5	less syn	less syn
P15431	Gamma-aminobutyric acid receptor subunit beta-1	Gabrb1	GABAA-β1	less syn	less syn
P19491;P19491-2;P19491-3;G3V914;F1LNE4	Glutamate receptor 2	Gria2	GluA2	less syn	slower turnover
D3ZA31		Mtmr2	Mtmr2	less deg	unchanged
P19492;P19492-2;G3V6Z5;G3V8Y9	Glutamate receptor 3	Gria3	GluA3	less syn	less syn
F1LSH6;Q9JKB0	Potassium/sodium hyperpolarization-activated cyclic nucleotide-gated channel 1	Hcn1	Hcn1	less syn	unchanged
G3V8Y8;Q8VHU1		Hip1	Hip1	less syn	unchanged
B5DFK5;F1LML7;Q99PW9		Hip1r	Hip1r	less syn	unchanged
Q9Z214;A0A0H2UI35;Q9Z214-2;Q9Z214-3;Q811R0;Q811R1;A0A0G2JYD5	Homer protein homolog 1	Homer1	Homer1	less syn	less syn & more deg
P51111;G3V9P7;Q6RW62		Htt	Htt	less syn	less syn
F1LPA3;Q76M68	IQ motif and SEC7 domain-containing protein 3	Iqsec3	Iqsec3	less syn	less syn
A0A0G2JSK5;P49134	Integrin beta-1	Itgb1	Itgb1	less syn	more syn
P31044	Phosphatidylethanolamine-binding protein 1;Hippocampal cholinergic neurostimulating peptide	Pebp1	Pebp1	less deg	less deg
P62483;A0A0G2K670	Voltage-gated potassium channel subunit beta-2	Kcnab2	Kcnab2	less syn	less syn
Q8K4Y5	Leucine-rich glioma-inactivated protein 1	Lgi1	Lgi1	less syn	less syn
P70587-2;F1M4K6;P70587-3;P70587;P70587-5;P70587-4;A0A0A0MXW8;F1LMG7;B8Q4H4;B8Q4H5;B8Q4H3;B8Q4F8;B8Q4G6;B8Q4H0;B8Q4G8;B8Q4G3;B8Q4G4;B8Q4G9;B8Q4G5;B8Q4G2;B8Q4F9;B8Q4H1;B8Q4G1;B8Q4G0;B8Q4H2;B8Q4G7	Leucine-rich repeat-containing protein 7	Lrrc7	Densin	less syn	less syn
A0A0G2KA27;O08873	MAP kinase-activating death domain protein	Madd	Madd	less syn	less syn
C9E895;P18088;B3VQJ0;Q63211	Glutamate decarboxylase 1	Gad1	Gad1	slower turnover	unchanged
Q05683	Glutamate decarboxylase 2	Gad2	Gad2	slower turnover	unchanged
P62963	Profilin-1	Pfn1	Profilin-1	less deg	slower turnover
D3ZY03;A0A0G2JXR9;O88382-3;O88382-2;O88382	Membrane-associated guanylate kinase, WW and PDZ domain-containing protein 2	Magi2	Magi2	less syn	unchanged
A0A0G2JW88	Microtubule-associated protein	Map4	Map4	less syn	unchanged
Q78PB6;Q78PB6-2	Nuclear distribution protein nudE-like 1	Ndel1	Ndel1	less syn	unchanged
F1LRZ7;P16884	Neurofilament heavy polypeptide	Nefh	Nefh	less syn	unchanged
Q62888;F1LQ41;A0A0U1RRX0;Q62888-2	Neuroligin-2	Nlgn2	NLGN2	less syn	less syn
P97546;P97546-3;P97546-1	Neuroplastin	Nptn	Neuroplastin	less syn	slower turnover
Q63372;Q63372-1;Q63372-3;Q63372-4;Q63372-5;Q63372-6;Q63372-7;Q63372-8;Q63372-9;Q63372-10;Q63372-11;Q63372-12;Q63372-13;Q63373;Q63373-2;Q63373-3;Q63373-4;M0RBN6;A0A0U1RRR4	Neurexin-1;Neurexin-1-beta	Nrxn1	NRXN1	less syn & more deg	less syn
Q568Y7;Q568Y7-2	Noelin-2	Olfm2	Noelin-2	less syn	unchanged
D3ZE55-2;D3ZE55	Protocadherin-8	Pcdh8	Pcdh8	less syn	more syn & less deg
Q9JKS6;Q9JKS6-3;Q9JKS6-2	Protein piccolo	Pclo	Piccolo	less syn	less syn
F1M7V4;D3Z9C7		Pclo	Piccolo	less syn	less syn
Q99M64	Phosphatidylinositol 4-kinase type 2-alpha	Pi4k2a	Pi4k2a	less syn	less deg
O88767;Q5BKC3	Protein deglycase DJ-1	Park7	Park7	less deg	unchanged
F1M2K6		Pkp4	Pkp4	less syn	unchanged
O35509;A0A0G2JZR4	Ras-related protein Rab-11B	Rab11b	Rab11b	less syn	slower turnover
P63319	Protein kinase C gamma type	Prkcg	PKC	less deg	slower turnover
P63012	Ras-related protein Rab-3A	Rab3a	Rab3a	less syn	less syn
Q63941;Q6P9W6;Q9QYT8	Ras-related protein Rab-3B	Rab3b	Rab3b	less syn	less syn
P14562;A0A0U1RRS9	Lysosome-associated membrane glycoprotein 1	Lamp1	Lamp1	more syn & less deg	less deg
P62824	Ras-related protein Rab-3C	Rab3c	Rab3c	less syn	less syn
O35394	Prenylated Rab acceptor protein 1	Rabac1	Rabac1	less syn	NA
D3KR63;F1LQ26;Q9Z1C7	Rap guanine nucleotide exchange factor 4	Rapgef4	Rapgef4	less syn	less syn
F1M8A4		Ppfia2	Liprin-α2	slower turnover	unchanged
B5DFG5;A0A0U1RRT8;A0A0U1RRW2;A0A0U1RRQ5;A0A0U1RS01		Sept6	Sept6	less deg	more deg
G3V9H1;D4AB55;O08774;A0A0G2K326;O08774-2	Regulator of G-protein signaling 12	Rgs12	Rgs12	less syn	less syn & more deg
F1LQN3;Q9JK11;Q5U1Z3	Reticulon;Reticulon-4	Rtn4	Rtn4	less syn	unchanged
D3ZDH8;Q9JJM9-2	Septin-5	Sept5	Sept5	less syn	less syn
A0A0G2KAW2;Q5JCS7;O35412;F1LS65;A0A0G2K2Z9;D3ZQP5	Signal-induced proliferation-associated 1-like protein 1	Sipa1l1	Sipa1l1	less syn & more deg	less syn
Q6QIX3;Q6QIX3-2	Zinc transporter 3	Slc30a3	ZnT-3	less syn	less syn
O35458	Vesicular inhibitory amino acid transporter	Slc32a1	rGVAT	less syn	more deg
D3ZZK3	Receptor protein-tyrosine kinase	Epha4	Epha4	more syn	less syn
D3ZE85	DOMON domain-containing protein FRRS1L	Frrs1l	Frrs1l	more syn	less syn
P19490;P19490-2	Glutamate receptor 1	Gria1	GluA1	more syn	less syn
F1LQ81;A0A0G2K6U1;Q9QUL6;O88960;O88975	Vesicle-fusing ATPase	Nsf	NSF	slower turnover	slower turnover
P60881;F8WG75	Synaptosomal-associated protein 25;Synaptosomal-associated protein	Snap25	Snap25	less syn	less syn
P0CC10	Leucine-rich repeat-containing protein 4B	Lrrc4b	NLG-3	more syn	less syn
A0A0G2JSQ1;Q63754	Beta-synuclein	Sncb	SNCB	less syn	unchanged
A0A0G2JU11;F1M386;A0A0A0MP77	Rap guanine nucleotide exchange factor 2	Rapgef2	Rapgef2	more syn	less syn
Q6P7A8;G3V7X5;P24054	SPARC-like protein 1	Sparcl1	Sparcl1	less syn	unchanged
Q62747-2;Q62747-3;Q62747-5;Q62747-8;Q62747-4;Q62747-6;Q62747-7;Q62747		Syt7	Syt7	more syn	less syn
Q9JHW5	Vesicle-associated membrane protein 7	Vamp7	Vamp7	more syn	less syn
Q6GMN2-2;Q6GMN2	Brain-specific angiogenesis inhibitor 1-associated protein 2	Baiap2	Baiap2	more syn & less deg	less syn
Q9WV48-3;Q9WV48;Q9WV48-4;Q9WV48-5	SH3 and multiple ankyrin repeat domains protein 1	Shank1	Shank1	less deg	unchanged
D4A4M0		Shisa6	Shisa6	less deg	NA
P11275;F1LZG4;A0A0G2JUV8;Q924T0	Calcium/calmodulin-dependent protein kinase type II subunit alpha	Camk2a	Camk2a	more syn & less deg	less syn
Q9Z2X5;Q6IRH2	Homer protein homolog 3	Homer3	Homer3	more syn & less deg	less syn
Q02563	Synaptic vesicle glycoprotein 2A	Sv2a	Sv2a	less syn	less syn
Q63475	Receptor-type tyrosine-protein phosphatase N2	Ptprn2	Ptprn2	more syn & less deg	less syn
Q62634;Q62634-2	Vesicular glutamate transporter 1	Slc17a7	vGlut1	more syn & less deg	less syn
Q63564	Synaptic vesicle glycoprotein 2B	Sv2b	Sv2b	more syn & less deg	less syn
P47861	Synaptotagmin-5	Syt5	Syt5	more syn & less deg	less syn
Q9WU70-2;Q9WU70;Q9WU70-3	Syntaxin-binding protein 5	Stxbp5	Stxbp5	less deg	slower turnover
A0A1E1ERK2;P32851;Q9QXG3	Syntaxin-1A	Stx1a	Stx1a	less deg	unchanged
P09951	Synapsin-1	Syn1	Syn1	less deg	unchanged
Q62876;A0A0G2K3P9;A0A0U1RRP1	Synaptogyrin-1	Syngr1	Syngr1	less deg	unchanged
Q9Z2I6	Synaptic vesicle glycoprotein 2C	Sv2c	Sv2c	less syn	unchanged
D4ABK1		Syngr3	Syngr3	less syn	less syn
Q3ZB97;P62944;P62944-2	AP complex subunit beta;AP-2 complex subunit beta	Ap2b1	AP2B	slower turnover	less syn
P06687	Sodium/potassium-transporting ATPase subunit alpha-3	Atp1a3	Atp1a3	slower turnover	less syn
A0A0A0MY16;Q1WIM2-2;Q1WIM2;A0A0G2K5U6	Cell adhesion molecule 2	Cadm2	CADM2	slower turnover	less syn
M0R7K1;F1LQV9		Lin7a	Lin7a	slower turnover	less syn
F1LPB9;P47709;A0A0G2K8B5;P70610	Rabphilin-3A;Double C2-like domain-containing protein beta	Rph3a;Doc2b	Rph3a	slower turnover	less syn
P61265	Syntaxin-1B	Stx1b	Stx1b	slower turnover	less syn
Q9Z2L0	Voltage-dependent anion-selective channel protein 1	Vdac1	Vdac1	less deg	slower turnover
Q62768-2;Q62768-3;Q62768	Protein unc-13 homolog A	Unc13a	Munc13-1	slower turnover	less syn
B1VKB4;Q9Z327-3;Q9Z327-2;A0A0H2UHQ9;Q9Z327	Synaptopodin	Synpo	Synpo	less syn	less syn & more deg
P21707;Q707P0	Synaptotagmin-1	Syt1	Syt1	less syn	less syn
G3V758;P22063	Contactin-2	Cntn2	Cntn2	more syn	NA
P97610	Synaptotagmin-12	Syt12	Syt12	less syn	less syn
Q62807;A0A0G2K9H6;A0A0U1RRV6;A0A0U1RRS2	Synaptotagmin-17	Syt17	Syt17	less syn	less syn
P31662	Sodium-dependent neutral amino acid transporter SLC6A17	Slc6a17	Slc6a17	slower turnover	more syn
Q62609;Q62609-3;Q62609-2;Q62609-4	Noelin	Olfm1	Noelin	more syn	unchanged
F1MA36;Q9QWN8	Spectrin beta chain, non-erythrocytic 2	Sptbn2	Sptbn2	slower turnover	less syn & more deg
D3ZFB6	Proline-rich transmembrane protein 2	Prrt2	Prrt2	more syn	unchanged
G3V6M3;P29101	Synaptotagmin-2	Syt2	Syt2	less syn	unchanged
Q9R1K2;Q9R1K2-2;A0A096P6L6;Q9R1K2-4;Q9R1K2-3	Teneurin-2;Ten-2, soluble form;Ten-2 intracellular domain	Tenm2	Tenm2	less syn	slower turnover
G3V851;Q9JI12	Vesicular glutamate transporter 2	Slc17a6	vGlut2	more syn	NA
D3ZWV8		Tiam1	Tiam1	less syn	less syn
F1LQL1;D3ZEW7;P29476;P29476-3;P29476-2	Nitric oxide synthase;Nitric oxide synthase, brain	Nos1	Nos1	more syn & less deg	unchanged
Q91ZY8	E3 ubiquitin-protein ligase TRIM9	Trim9	Trim9	less syn	less deg
P70600-3;P70600	Protein-tyrosine kinase 2-beta	Ptk2b	Ptk2b	more syn & less deg	slower turnover
Q761X5;A0A0G2JTK0;F1LM73;F1LNE2;O08722	Netrin receptor UNC5C;Netrin receptor UNC5B	Unc5c;Unc5b	Unc5B/C	less syn	less syn
D4ABN3;Q62910-2;Q62910;Q62910-5;Q62910-4;Q62910-3;Q62910-6;F1LZU2	Synaptojanin-1	Synj1;4933427I04Rik	Synj1	more syn & less deg	slower turnover
