# Supplementary material for: Proteome dynamics during homeostatic scaling in cultured neurons
Source: eLife. 2020 Apr 2;9:e52939. doi: 10.7554/eLife.52939 (PMC7117909; doi:10.7554/eLife.52939)
Supplement: Figure 6—source data 1. [file elife-52939-fig6-data1.xlsx]

## Sheet: Sheet1
Figure 6 – Source Data 1: Changes in protein abundance during homeostatic up- and down-scaling.
Protein group ID	Uniprot Identifier	Protein Names	Gene Names	BIC vs Ctrl			TTX vs Ctrl
				p-value	fold change [log2]	Significance level after Benajmini-Hochberg correction	p-value	fold change [log2]	Significance level after Benajmini-Hochberg correction
6795	Q7TNJ7;Q7TNJ7-4	Calcium/calmodulin-dependent protein kinase type 1G	Camk1g	0.071377	0.155208	ns	8.47602e-08	-1.32829	FDR1%
1002	A0A0G2QC02;Q6MG76		Skiv2l	0.280727	0.0446899	ns	0.504324	0.0297443	ns
1003	Q7TMC7;A0A0G2QC06;Q7TP24;P12346;Q4FZX7	Serotransferrin;Signal recognition particle receptor subunit beta	Tf;Srprb	0.64545	0.0849898	ns	0.138297	-0.0873861	ns
1004	A1L1J4;A0A0G2QC17;O88483	[Pyruvate dehydrogenase [acetyl-transferring]]-phosphatase 1, mitochondrial	Pdp1	0.553738	0.0139461	ns	0.824709	0.00366215	ns
1250	B0BMU8;Q80XX4	Musculoskeletal embryonic nuclear protein 1	Mustn1	0.164983	0.136805	ns	1.95513e-05	-0.813888	FDR1%
4435	O35532	Methylsterol monooxygenase 1	Msmo1	0.47476	0.00485565	ns	2.31609e-10	-0.631582	FDR1%
1855	D3Z8D8		Slitrk1	5.7311e-05	-0.209381	FDR1%	3.32972e-10	-0.652413	FDR1%
1014	A0A0H2UH93;P60756	MAM domain-containing glycosylphosphatidylinositol anchor protein 2	Mdga2	NA	NA	NA	0.397081	-0.0873658	ns
1015	A0A0H2UH94;D3ZZL9	GRIP and coiled-coil domain-containing protein 2	Gcc2	0.0204818	0.251741	ns	0.196573	-0.0349984	ns
1017	A0A0H2UHA6;Q9Z142	Transmembrane protein 33	Tmem33	0.0108895	0.0349119	ns	0.00323255	-0.0822026	ns
1019	A0A0H2UHB1;Q62904	3-keto-steroid reductase	Hsd17b7	0.828165	-0.0585078	ns	NA	NA	NA
1020	A0A0H2UHC0;F1LQX4-3;F1LQX4-2;F1LQX4	Rho GTPase-activating protein 44	Arhgap44	0.196359	-0.0566853	ns	0.0209551	0.057476	ns
1022	A0A0H2UHD9;Q5XIA1	Nicalin	Ncln	0.0917194	0.0852058	ns	0.739162	0.0144817	ns
1023	A0A0H2UHE1;P13086;P70631	Succinyl-CoA ligase [ADP/GDP-forming] subunit alpha, mitochondrial	Suclg1	0.32925	-0.0642408	ns	0.342699	-0.0569947	ns
1024	A0A0H2UHE5;P20650;Q4V8L2	Protein phosphatase 1A	Ppm1a	0.668355	0.0116793	ns	0.650311	0.0107201	ns
1025	A0A0H2UHF5;P49655	ATP-sensitive inward rectifier potassium channel 10	Kcnj10	0.468928	0.00123468	ns	0.0503482	0.274388	ns
1026	A0A0H2UHF6;Q9ES40	PRA1 family protein 3	Arl6ip5	0.264187	0.0073659	ns	0.033958	-0.0921897	ns
5874	Q5PPG6	Nucleosome assembly protein 1-like 5	Nap1l5	0.962026	0.00596896	ns	2.80165e-05	-0.596806	FDR1%
1032	A0A0H2UHI7;Q505J9	ATPase family AAA domain-containing protein 1	Atad1	0.120058	0.0337533	ns	0.00323862	0.0473721	ns
1036	A0A0H2UHK3;Q5M7V7	FAST kinase domain-containing protein 2	Fastkd2	0.960861	-0.066142	ns	0.591027	0.0313481	ns
6591	Q6IMZ5;P70567	Tropomodulin-1	Tmod1	0.033105	-0.139538	ns	1.67192e-09	-0.536355	FDR1%
104_m	A0A0G2JSH9;P35704	Peroxiredoxin-2	Prdx2	0.648307	0.0147524	ns	0.127147	0.0681521	ns
4074	G3V856;Q5BKC9;Q6AZ62;Q9JK73	Ephexin-1	LOC100912512;Ngef	0.860081	0.0238823	ns	2.31808e-08	-0.49376	FDR1%
7065	Q9JLD2	Neuroserpin	Serpini1	0.00760034	0.0884474	ns	3.21199e-09	-0.475397	FDR1%
1047	A0A0H2UHP9			0.843107	0.0793766	ns	0.00675292	-0.0546743	ns
1048	A0A0H2UHQ0			0.144194	-0.0800313	ns	0.861565	0.0148727	ns
1049	A0A0H2UHQ1;F1LZX7;P24049;D3Z9G9;Q7TPJ7	60S ribosomal protein L17	Rpl17;RGD1560017;RGD1359290	0.0220528	0.0784221	ns	0.0230474	-0.149265	ns
105	A0A0G2JSI1;Q9JLJ3	4-trimethylaminobutyraldehyde dehydrogenase	Aldh9a1	0.160796	0.0548422	ns	0.0162784	0.0612716	ns
1050	A0A0H2UHQ3;B5DFH2;P0C5W1	Microtubule-associated protein 1S;MAP1S heavy chain;MAP1S light chain	Map1s	0.644981	-0.00227119	ns	0.035382	0.0482104	ns
1051	A0A0H2UHQ8;D3ZFA8;P04644;D3ZHU9;D3ZKG6;D3ZM01;M0R8M8;F1M5B1	40S ribosomal protein S17	LOC100364909;Rps17;LOC100361180;RGD1559955;RGD1562381;LOC100365961;LOC102554167	0.364957	0.0536598	ns	0.00366589	-0.109528	ns
1052	A0A0H2UHR5;Q00972	[3-methyl-2-oxobutanoate dehydrogenase [lipoamide]] kinase, mitochondrial	Bckdk	0.273354	0.0130565	ns	0.199007	-0.0553523	ns
3660	F1M3J7;A0A0G2K6L9		Cntnap4	0.0904358	0.0436105	ns	1.82456e-11	-0.465094	FDR1%
1058	A0A0H2UHS9;Q3KR56	GRAM domain-containing protein 1A	Gramd1a	0.441276	0.0113135	ns	0.0608498	-0.0923613	ns
1059	A0A0H2UHT3;P0C2C0	39S ribosomal protein L22, mitochondrial	Mrpl22	0.815943	0.0596476	ns	0.358315	-0.114242	ns
1060	Q8K3W9;A0A0H2UHT5;F1LNI5	Protein phosphatase 1G	Ppm1g	0.35376	0.0700078	ns	0.108601	-0.125711	ns
3307	F1LMJ8;Q99P63	Calcium uptake protein 2, mitochondrial	Micu2	0.287158	0.0272549	ns	3.37291e-13	-0.439487	FDR1%
232	A0A0G2JUR5			0.0430492	0.113265	ns	2.98311e-08	-0.425291	FDR1%
1063	A0A0H2UHU1;P61515;D4AAZ6;D4A7B1;D4A829	Putative 60S ribosomal protein L37a;60S ribosomal protein L37a	Rpl37a-ps1;Rpl37a;LOC679823	0.089659	0.0537916	ns	0.0077981	-0.148205	ns
1065	A0A0H2UHV2;Q5EB59	Mediator of RNA polymerase II transcription subunit 23	Med23	0.624993	0.0575697	ns	NA	NA	NA
5885	Q5PPL3	Sterol-4-alpha-carboxylate 3-dehydrogenase, decarboxylating	Nsdhl	0.00241822	-0.0921594	ns	3.21877e-18	-0.417087	FDR1%
1070	A0A0H2UHX1;A1L1I6;Q6RJR6-2	Reticulon;Reticulon-3	Rtn3	0.225959	-0.0293582	ns	0.421064	0.00251772	ns
2033	D3ZE55-2;D3ZE55	Protocadherin-8	Pcdh8	1.54631e-23	0.62966	FDR1%	2.42351e-13	-0.46951	FDR1%
1072	A0A0H2UHY0;Q6MG21	Valine--tRNA ligase, mitochondrial	Vars2	0.0480738	0.0663682	ns	0.526993	-0.0455539	ns
4726	P17425	Hydroxymethylglutaryl-CoA synthase, cytoplasmic	Hmgcs1	0.00301307	0.14405	ns	3.83663e-12	-0.415696	FDR1%
1076	A0A0H2UI02;D4AE59;D4AE59-2	Serine/threonine-protein kinase STK11	Stk11	0.0253243	-0.0374346	ns	0.0545668	0.0678952	ns
761	A0A0G2K624;A0A0H2UI28;P23363;Q99NV7;C8CEB1	Brain-derived neurotrophic factor	Bdnf	6.40077e-09	0.781201	FDR1%	NA	NA	NA
1079	A0A0H2UI10;Q8VIJ5;Q8VIJ5-3;Q8VIJ5-2	Protein O-GlcNAcase	Mgea5	0.984413	0.00484401	ns	0.00559534	0.158998	ns
4640	P10362;G3V7X2;Q8CGL8	Secretogranin-2;Secretoneurin;Manserin	Scg2	1.7427e-17	0.707187	FDR1%	0.000415651	0.263927	FDR1%
1080	A0A0H2UI14;Q9QZH7	F-box/LRR-repeat protein 20	Fbxl20	0.107844	0.0551141	ns	0.42237	-0.028307	ns
1081	F7FG31;A0A0H2UI20;Q9Z2F5;Q6AZ26	C-terminal-binding protein 1	Ctbp1	0.115705	-0.0343495	ns	0.313939	0.0268228	ns
4315	M0R970			0.00124306	0.158245	ns	0.000720508	-0.41022	FDR1%
1156	A0A1W2Q656;Q5U215		Dner	0.472274	0.0105349	ns	0.00128263	-0.408926	FDR1%
1088	A0A0K0WYI6			0.309529	-0.104913	ns	NA	NA	NA
4922	P47971;A0A0H2UHC1	Neuronal pentraxin-1	Nptx1	9.05423e-19	-0.40522	FDR1%	4.17186e-38	1.09937	FDR1%
5258	Q02769;Q8BHH4	Squalene synthase	Fdft1	0.917278	0.0109939	ns	6.58886e-12	-0.403155	FDR1%
1095	A0A0U1RRV5;D3ZKG9	Clustered mitochondria protein homolog	Cluh	0.538043	0.000123675	ns	0.333561	0.0452016	ns
1096	A0A0U1RRV7;Q0ZFS8		Srsf3	0.309611	0.0645299	ns	0.71775	0.0166909	ns
1098	A0A0U1RRZ4;Q4KLP0	Probable 2-oxoglutarate dehydrogenase E1 component DHKTD1, mitochondrial	Dhtkd1	0.523689	-0.00670881	ns	0.857855	0.000170522	ns
1099	A0A0U1RRZ5;Q6MG48	Protein PRRC2A	Prrc2a	0.126015	-0.0522866	ns	0.733179	-0.0354159	ns
1101	F1LY19;A0A0U1RS25		Upf1	0.782798	0.00622406	ns	0.555207	-0.0431407	ns
3824	F2W8B2;P21451	Endothelin B receptor	Ednrb	7.03786e-10	0.558812	FDR1%	0.0374667	-0.252753	ns
1441	B2B9A9		Efnb2	0.00463026	-0.141899	ns	1.8012e-05	-0.387758	FDR1%
164	A0A0G2JTA7;D4AAY3		Rasal2	0.0772083	0.0759566	ns	5.69514e-05	-0.376351	FDR1%
1108	A0A140TAB3;P37285-2;P37285-3;P37285;A0A1B0GWT8	Kinesin light chain 1	Klc1	0.601345	0.00077805	ns	0.00361131	0.0600562	ns
1110	A0A140TAB8;P24062	Insulin-like growth factor 1 receptor;Insulin-like growth factor 1 receptor alpha chain;Insulin-like growth factor 1 receptor beta chain	Igf1r	0.724927	0.0419631	ns	0.272978	0.0448698	ns
1111	A0A140TAC3;O88339	Epsin-1	Epn1	0.218811	-0.0371443	ns	0.00302328	-0.084224	ns
5173	P81377;Q3SWU5;F1M9X5;Q5BJR2	cAMP-dependent protein kinase type I-beta regulatory subunit	Prkar1b;Cyp4f18	0.284225	0.0179207	ns	5.75108e-14	-0.372323	FDR1%
1117	A0A140TAE6;Q9Z311;Q9Z311-2	Trans-2-enoyl-CoA reductase, mitochondrial	Mecr	0.001405	-0.0573217	ns	0.0798297	-0.025949	ns
1119	B0BMT8;A0A140TAF2;O09032	ELAV-like protein;ELAV-like protein 4	Elavl4	0.562286	-0.0469237	ns	0.196556	-0.0882286	ns
921	G3V7K3;A0A0G2K9I6;P13635;Q9JL97	Ceruloplasmin	Cp	7.13365e-06	0.468156	FDR1%	0.0586346	-0.116602	ns
4709	P15431	Gamma-aminobutyric acid receptor subunit beta-1	Gabrb1	0.110582	-0.107694	ns	2.5207e-12	-0.371572	FDR1%
1126	A0A140TAH1;Q9JJ50-2;Q9JJ50	Hepatocyte growth factor-regulated tyrosine kinase substrate	Hgs	0.579817	-0.0221637	ns	0.283073	0.0880602	ns
1127	A0A140TAI1;Q9JJP9	Ubiquilin-1	Ubqln1	0.99713	0.0208956	ns	0.384727	0.100209	ns
1129	A0A140TAI6;D3ZZ95;F1M706;D3ZJJ6;D4A1Q0;P39032;A0A0G2K6X1;A0A0G2JUV9	60S ribosomal protein L36	LOC100361060;LOC100360439;LOC100359616;LOC100361644;Rpl36	0.305213	0.0781256	ns	0.818605	-0.062732	ns
1132	A0A140TAJ3;Q32PX7	Far upstream element-binding protein 1	Fubp1	0.06759	0.0626402	ns	0.792482	-0.0603904	ns
5130	P63249	cAMP-dependent protein kinase inhibitor alpha	Pkia	2.45457e-06	-0.390958	FDR1%	1.51212e-05	0.343807	FDR1%
1137	A0A140UHX9;Q6AYE1		Ccz1b	0.0286655	0.114806	ns	0.0122394	0.114238	ns
1138	A0A146J2K6;A0A096MJG7;F1LVX3		LOC102554591	0.319094	-0.0336341	ns	0.399126	0.0170687	ns
1139	A0A173DW29;G3V792;Q63100-3;Q63100;A0A173DW41;A0A173DW30;Q63100-4	Cytoplasmic dynein 1 intermediate chain 1	Dync1i1	0.692442	0.0474235	ns	0.56714	0.0207904	ns
6474	Q6AY19	AarF domain-containing protein kinase 4	Adck4	0.203542	0.0542792	ns	7.56877e-11	-0.350096	FDR1%
1145	A0A1E1ERK2;P32851;Q9QXG3	Syntaxin-1A	Stx1a	0.785428	-0.00796254	ns	0.00570682	0.116014	ns
5630	Q505J7		Gal3st3	0.00249811	-0.130013	ns	0.00137194	-0.346189	FDR1%
6833	Q80W98	Small glutamine-rich tetratricopeptide repeat-containing protein beta	Sgtb	0.169563	0.0626157	ns	3.38496e-08	-0.346066	FDR1%
4719	P16975	SPARC	Sparc	7.12725e-12	0.394622	FDR1%	0.000609729	-0.166153	FDR1%
1150	B2GUU6;A0A1S7IVJ5;A0A1S7IVI8;A0A1S7IVI4;A0A1S7IVH9;A0A1S7IVH8;A0A1S7IVH6;A0A1S7IVH4;A0A1S7IVG9;Q6TEK4	Vitamin K epoxide reductase complex subunit 1	Vkorc1	0.0460802	0.120267	ns	0.0659735	0.0982224	ns
1152	A0A1W2Q5Z6;Q4QQV1	Tax1-binding protein 3	Tax1bp3	0.298389	0.0617707	ns	0.687664	0.0315635	ns
4610	P09456;Q6LCA5	cAMP-dependent protein kinase type I-alpha regulatory subunit;cAMP-dependent protein kinase type I-alpha regulatory subunit, N-terminally processed	Prkar1a	0.659534	0.0187678	ns	1.22776e-10	-0.339239	FDR1%
7140	Q9WVB1	Ras-related protein Rab-6A	Rab6a	0.0125463	0.0743637	ns	3.23171e-06	-0.337834	FDR1%
1158	A0A1W2Q678;A0A1W2Q6F9			0.21246	0.0214639	ns	0.733285	-0.0250907	ns
1159	A0A1W2Q680;Q6AYA1	H/ACA ribonucleoprotein complex subunit 1	Gar1	NA	NA	NA	0.356242	0.0367025	ns
1160	A0A1W2Q690;B0BNE2;A0A1W2Q620	DNA-directed RNA polymerases I, II, and III subunit RPABC1	Polr2e	0.584079	0.0931892	ns	0.737455	-0.0543585	ns
6100	Q5XIE0	Acidic leucine-rich nuclear phosphoprotein 32 family member E	Anp32e	0.000267304	0.405143	FDR1%	0.0184629	0.0844736	ns
2674	D3ZZ44		Elfn1	NA	NA	NA	1.18937e-06	-0.328415	FDR1%
1167	A0JN17;P08644-2;P08644	GTPase KRas;GTPase KRas, N-terminally processed	Kras	0.0516154	-0.0538161	ns	0.122345	-0.0666511	ns
4410	O35052	Phosphatidate cytidylyltransferase 1	Cds1	NA	NA	NA	0.000205339	-0.327677	FDR1%
1169	A0JN29		Lnp	0.00243417	-0.105716	ns	0.140101	-0.0873588	ns
117	A0A0G2JSL0;P28073	Proteasome subunit beta type-6	Psmb6	0.51227	0.0155016	ns	0.8071	0.0505375	ns
4415	O35115	Four and a half LIM domains protein 2	Fhl2	0.00254163	-0.245494	ns	0.000612018	-0.322855	FDR1%
3479	F1LSH6;Q9JKB0	Potassium/sodium hyperpolarization-activated cyclic nucleotide-gated channel 1	Hcn1	0.677054	0.0401157	ns	8.28988e-08	-0.321364	FDR1%
736	A0A0G2K5D5;D3ZMS4		Arhgap26	0.0107396	-0.0836905	ns	1.16537e-13	-0.318867	FDR1%
1174	A0JPM9	Eukaryotic translation initiation factor 3 subunit J	Eif3j	0.126663	-0.0457302	ns	0.965257	-0.0217542	ns
1179	A0MV40		Shisa4	0.211673	-0.0110246	ns	0.0237966	-0.154291	ns
118	A0A0G2JSL2;Q69BT7;A0A0G2JX69	Trafficking protein particle complex subunit 4	Trappc4	0.916124	0.00951354	ns	0.532778	0.025864	ns
1180	D4A6P3;A0MZ67;A0MZ67-2;A0A0G2K9C4	Shootin-1	RGD1311558	0.943364	0.0344938	ns	0.252765	0.0929347	ns
1182	Q499Q4;A1A5L2;Q62752		Pgm1	0.34106	0.0630353	ns	0.115116	0.0804053	ns
1188	A1A5R3	KRR1 small subunit processome component	Krr1	NA	NA	NA	0.623961	0.0683408	ns
1189	A1A5S1	Pre-mRNA-processing factor 6	Prpf6	0.357295	0.0286487	ns	0.726309	0.00269408	ns
119	D3ZLW4;A0A0G2JSL4;P49816-4;P49816-2;P49816-3;P49816	Tuberin	Tsc2	0.3034	-0.014945	ns	0.212782	0.115172	ns
1192	A1L108;A1L108-2	Actin-related protein 2/3 complex subunit 5-like protein	Arpc5l	0.0387742	-0.0867615	ns	0.798742	0.0482953	ns
1194	A1L127;A0A0G2K1B4;Q62739	Rab-3A-interacting protein	Rab3ip	NA	NA	NA	0.15947	0.180133	ns
1195	A1L134	Ancient ubiquitous protein 1	Aup1	NA	NA	NA	0.687525	-0.00829771	ns
1196	A1L1J8		Rab5b	0.35545	0.0147621	ns	0.98525	0.0078611	ns
1198	V9GZ87;A1L1K4	CDC42 small effector protein 2	LOC100362023;Cdc42se2	0.0635897	-0.170398	ns	0.537268	-0.0074641	ns
619	A0A0G2K2S2;P11167	Solute carrier family 2, facilitated glucose transporter member 1	Slc2a1	0.475441	0.214251	ns	0.000378499	-0.318318	FDR1%
12	A0A096MJ78;A0A0G2K3F4;B2GV40		Spred3	0.274573	-0.0739259	ns	NA	NA	NA
120	A0A0G2JSL8;A0A0G2K6X9;Q64640	Adenosine kinase	Adk	0.89535	0.0601945	ns	0.289441	0.0556905	ns
1200	A1L1L2	Transmembrane protein 214	Tmem214	0.428307	-0.0395159	ns	0.412379	-0.0333143	ns
3354	F1LNZ5;P20236	Gamma-aminobutyric acid receptor subunit alpha-3	Gabra3	NA	NA	NA	3.56815e-05	-0.315041	FDR1%
1203	A1L1M0;P27791-2;P27791	cAMP-dependent protein kinase catalytic subunit alpha	Prkaca	0.218919	-0.0807315	ns	0.108287	0.0936333	ns
828	A0A0G2K7L2;F1LZ40		Igsf3	0.468541	0.0451659	ns	1.988e-05	-0.314036	FDR1%
1206	A2RRU2		Tmem127	0.500537	0.0273447	ns	0.621539	-0.0669101	ns
5077	P62813	Gamma-aminobutyric acid receptor subunit alpha-1	Gabra1	0.802529	-0.0169097	ns	3.82458e-05	-0.313692	FDR1%
1209	A2RUW1;C9K104	Toll-interacting protein	Tollip;tollip	0.926471	-0.0170904	ns	0.00624638	0.0760788	ns
1211	A2VCW8		Sept7	0.0140448	-0.0688021	ns	0.989405	0.0181219	ns
3518	F1LUB7;Q6RVG2-3;Q6RVG2-2;Q6RVG2	Anion exchange protein;Electroneutral sodium bicarbonate exchanger 1	Slc4a8	0.0764081	-0.0482439	ns	1.5163e-09	-0.311261	FDR1%
1214	A2VD09;Q9QZM5	Abl interactor 1	Abi1	0.0280008	-0.0824918	ns	0.799463	-0.00607443	ns
371	A0A0G2JXN8;B5DF26		Osbpl8	0.387946	-0.0237828	ns	2.19699e-23	-0.310772	FDR1%
1217	A4F267	Mitochondrial import receptor subunit TOM40B	Tomm40l	NA	NA	NA	0.634598	-0.0748071	ns
2879	D4A4Q4		Ociad2	5.0059e-05	0.300691	FDR1%	0.00436911	-0.369027	ns
1227	A7VLG3;Q4QQS3	Protein OSCP1	OSCP1;Oscp1	0.216747	-0.0567343	ns	0.265214	0.136315	ns
1228	Q8HIC6;Q7HKW3;Q35737;Q06QG7;Q06QE1;Q06QA2;Q06Q89;D2E6K0;A7XYB9;P05508	NADH-ubiquinone oxidoreductase chain 4	Mt-nd4;NADH4;ND4;Nd4;Mtnd4	0.6222	0.0835665	ns	0.666337	-0.0290414	ns
1230	A8C4G9;A0A0G2K9F7;K0J5S5;Q5XI91		Zmynd8;spikar	0.551431	-0.0899732	ns	0.3326	-0.0256998	ns
1232	A8WCF8;A0A0G2K272	Tumor protein p63-regulated gene 1-like protein	Tprg1l	0.00660789	-0.0667431	ns	0.38434	0.0586908	ns
6234	Q63259	Receptor-type tyrosine-protein phosphatase-like N	Ptprn	0.000375391	0.296517	FDR1%	0.393332	0.130394	ns
124	A0A0G2JSM7;Q63028;Q63028-2	Alpha-adducin	Add1	0.332478	-0.0942722	ns	0.335677	-0.0607226	ns
1241	A9UMV7		Uqcr11	0.260738	-0.0190565	ns	0.143898	-0.050012	ns
1242	M0RDM4;Q6I8Q6;M0RCL5;K7R8M0;G3V9C0;D3ZVK7;A9UMV8;Q64598;Q4FZT6;Q00728;P0C170;P0C169;D4ACV3;K7S2S2;P0CC09;P02262	Histone H2A;Histone H2A.J;Histone H2A type 1-F;Histone H2A type 3;Histone H2A type 4;Histone H2A type 1-E;Histone H2A type 1-C;Histone H2A type 2-A;Histone H2A type 1	LOC680322;Hist1h2af;LOC100910554;Hist1h2ao;Hist1h2ac;Hist1h2ak;H2afj;Hist2h2ac;Hist2h2aa2;Hist2h2aa3	0.417673	-0.0816393	ns	0.939537	0.033329	ns
1243	A9UMV9		Ndufa7l	0.448665	-0.0830261	ns	0.829293	-0.0839044	ns
1244	A9UMW1;P14942;Q6TUG1	Glutathione S-transferase;Glutathione S-transferase alpha-4	Gsta4;LOC688925	0.301742	-0.03962	ns	0.949177	0.0686931	ns
1249	B0BMU7;Q6IUP3	Elongator complex protein 5	Elp5	NA	NA	NA	0.00421409	0.122219	ns
125	A0A0G2JSM8			0.00174679	-0.0700192	ns	0.0999529	0.048464	ns
3728	F1M7W0;D3ZCV9;D3ZBZ7;P54757-5;P54757-4;P54757-3;P54757-2;P54757	Receptor protein-tyrosine kinase;Ephrin type-A receptor 5	Epha5	0.0282054	-0.0791433	ns	8.78746e-07	-0.309184	FDR1%
1252	B0BMV5;P70550	Ras-related protein Rab-8B	Rab8b	0.483123	-0.0406975	ns	0.0546705	0.0892509	ns
1254	B0BMW0;P61107;A0A1B0GWR3	Ras-related protein Rab-14	Rab14	0.350879	0.025535	ns	0.15819	-0.0273891	ns
1255	B0BMW2;O70351	3-hydroxyacyl-CoA dehydrogenase type-2	Hsd17b10	0.932713	0.00215264	ns	0.227437	-0.0274059	ns
1256	B0BMX3		S100a16	0.982971	0.0589808	ns	0.577497	-0.0582862	ns
1259	B0BMY7		Twf2	0.0150448	-0.0673747	ns	0.160065	-0.0173374	ns
126	A0A0G2JSN5;Q62897;A0A0G2JSW5;Q62897-3;Q62897-2	Potassium voltage-gated channel subfamily D member 3	Kcnd3	0.936022	0.0108855	ns	0.0250691	-0.0665108	ns
1264	B0BN06		Bcas3	0.061197	-0.0865588	ns	0.28338	0.0672672	ns
1265	B0BN18	Prefoldin subunit 2	Pfdn2	0.268174	0.0221756	ns	0.531649	0.0265711	ns
1267	Q5RJZ3;B0BN20	Tetraspanin	Tspan6	0.490049	0.083632	ns	0.0107163	0.14121	ns
847	A0A0G2K7X0;Q5PPH9;F7EL36;P49911	Acidic leucine-rich nuclear phosphoprotein 32 family member A	Anp32a	8.7219e-09	0.290397	FDR1%	0.339091	-0.0642599	ns
1274	B0BN51;P63164;Q63747;Q5XII7;P17136	Small nuclear ribonucleoprotein-associated protein;Small nuclear ribonucleoprotein-associated protein N;Small nuclear ribonucleoprotein-associated protein B	Snrpb;Snrpn	0.546364	-0.0131897	ns	0.115923	-0.0637228	ns
1276	B0BN56	28S ribosomal protein S31, mitochondrial	Mrps31	0.382129	0.016453	ns	0.131386	-0.0613377	ns
2873	D4A4L5		Isca2	0.00591236	-0.0543807	ns	4.19747e-14	-0.303729	FDR1%
4705	P14925;P14925-3;P14925-4;P14925-5;P14925-2;P14925-6;P14925-7	Peptidyl-glycine alpha-amidating monooxygenase;Peptidylglycine alpha-hydroxylating monooxygenase;Peptidyl-alpha-hydroxyglycine alpha-amidating lyase	Pam	2.86888e-14	0.242031	FDR1%	9.23512e-15	-0.368374	FDR1%
1281	Q5I0K4;B0BN68		Mrps9	0.48404	0.0329297	ns	0.850854	-0.0867795	ns
1282	B0BN72	Protein FAM195B	Fam195b	0.798001	-0.0092296	ns	NA	NA	NA
4580	P07171	Calbindin	Calb1	0.48598	-0.0194675	ns	1.36324e-11	-0.30318	FDR1%
1284	B0BN81;P24050	40S ribosomal protein S5;40S ribosomal protein S5, N-terminally processed	Rps5	0.842247	0.00531703	ns	0.00475527	-0.172318	ns
1285	B0BN82		Rpf2	0.397714	0.0827437	ns	0.194633	0.0657385	ns
1286	B0BN83	Armadillo repeat-containing protein 1	Armc1	0.0579315	-0.0478141	ns	0.0355455	-0.123291	ns
1287	B0BN85;Q7TQ12;F1LMY6	Suppressor of G2 allele of SKP1 homolog	Sugt1	0.00435082	-0.0647943	ns	0.0298894	0.0381239	ns
6451	Q6AXQ0	SUMO-activating enzyme subunit 1;SUMO-activating enzyme subunit 1, N-terminally processed	Sae1	2.52036e-08	0.280499	FDR1%	0.106606	0.0658495	ns
1289	B0BN94	Protein FAM136A	Fam136a	0.0213101	-0.104	ns	0.0584264	0.0563483	ns
5584	Q4V7F2	Cysteine-rich with EGF-like domain protein 1	Creld1	0.51861	-0.00967996	ns	4.64953e-12	-0.302899	FDR1%
1292	B0BNA3;F7FFR1		Rars2	0.798584	0.0590533	ns	0.772225	0.00244886	ns
2896	D4A520		Pptc7	0.176952	-0.0984263	ns	4.84589e-11	-0.301349	FDR1%
2650	D3ZYJ5		Gramd1b	0.116456	0.00268719	ns	5.1235e-09	-0.295521	FDR1%
6290	Q63827;F1LM54;Q04589;Q62992	Fibroblast growth factor receptor;Fibroblast growth factor receptor 1	Fgfr1;Fgfr1-ps1	0.00696693	-0.169029	ns	5.62298e-07	-0.295156	FDR1%
13	A0A096MJ90;F1LNW6;B5DFM3		Ly6h	0.024629	-0.0605956	ns	0.0094813	0.097579	ns
4973	P54001	Prolyl 4-hydroxylase subunit alpha-1	P4ha1	0.720682	-0.0270458	ns	0.000481613	-0.293166	FDR1%
1301	B0BNB5;M0R9Y3		Nup43	0.866223	0.0427416	ns	0.461156	0.0252403	ns
1302	B0BNB9		Htra2	0.0181057	-0.0515767	ns	0.0580211	-0.0531648	ns
1305	B0BNE3		Trappc5	0.772159	-0.0114105	ns	0.555905	0.0335738	ns
1423	B1WC32;F1LS72;Q4G010		Uba2	1.30078e-09	0.402746	FDR1%	0.000534188	0.0794274	FDR1%
1307	B0BNE6		Ndufs8	0.873227	-0.0415346	ns	0.246063	-0.0822309	ns
1308	F1M8Y2;F1M9I6;B3STU1;B0BNE7	Tetraspanin	Tspan7	0.0661028	-0.123282	ns	0.652986	-0.00410821	ns
131	A0A0G2JSQ9			0.905397	-0.0500135	ns	0.966193	0.0412718	ns
1311	B0BNF5;A0A0G2JUS0;D4A2X0;F1LMH5;A0A0G2JXZ5;Q91XU1	Protein quaking	Qk;LOC100910212;Qki	0.0118085	0.0912765	ns	0.910653	0.0839211	ns
1312	B0BNF6		March5	0.503159	-0.0448717	ns	0.12005	-0.0159208	ns
1313	B0BNG0;A0A0A0MXU4	ER membrane protein complex subunit 2	Emc2	0.0846756	0.0478142	ns	0.120883	-0.0519029	ns
6326	Q642E5;Q62967;Q99PJ4;Q71V32	Diphosphomevalonate decarboxylase	Mvd;Mvpd	4.6117e-09	0.270289	FDR1%	0.54652	-0.112873	ns
132	A0A0G2JSR0;Q9R1Z0	Voltage-dependent anion-selective channel protein 3	Vdac3	0.0396076	0.089633	ns	0.0754667	0.0410395	ns
1321	B0BNI9;Q9QZG1	Solute carrier family 22 member 23	Slc22a23	0.452133	-0.0030116	ns	0.00660176	-0.160768	ns
1323	B0BNJ1		Sri	0.344346	-0.0287538	ns	0.0555288	0.0601693	ns
1324	B0BNJ4		Ethe1	0.204699	-0.0135212	ns	0.408182	-0.0254753	ns
1325	B0BNJ5;P69736	Endothelial differentiation-related factor 1	Edf1	NA	NA	NA	0.692104	-0.0754693	ns
1328	B0BNK1		Rab5c	0.438166	0.0437358	ns	0.454882	0.0403389	ns
3391	F1LPV2;P98166	Very low-density lipoprotein receptor	Vldlr	0.00492975	-0.141958	ns	9.81774e-07	-0.291766	FDR1%
4827	P29534;A0A0G2K127	Vascular cell adhesion protein 1	Vcam1	0.00114239	-0.217159	ns	2.25137e-07	-0.291156	FDR1%
1332	B0BNL8;G3V648		Agpat3	0.994005	-0.0126053	ns	0.776256	-0.000729482	ns
1335	B0BNM1	NAD(P)H-hydrate epimerase	Apoa1bp	0.287505	0.00756655	ns	0.414878	0.0245832	ns
134	A0A0G2JSR2;B1AC44;P40748;Q5M8A7	Synaptotagmin-3	Syt3	0.0379029	-0.158278	ns	0.180789	0.0343986	ns
1340	B0BNM7;G3V985		Sco1	0.115935	-0.0891227	ns	0.556385	-0.0120676	ns
1341	B0BNM9	Glycolipid transfer protein	GLTP	0.226943	0.0628564	ns	0.014243	0.132023	ns
3954	G3V6U4;A0A1B0GWU2;A0A1B0GWQ5;Q8CH84;A0A1B0GWY9	ELAV-like protein;ELAV-like protein 2	Elavl2	0.732201	0.0111227	ns	4.98299e-10	-0.290673	FDR1%
1345	B0K014;D4A9K3	D-tyrosyl-tRNA(Tyr) deacylase	Dtd1	0.169663	-0.0304158	ns	0.0255443	0.0678502	ns
1199	A1L1K8		Habp4	0.107621	-0.124174	ns	1.6229e-06	-0.287064	FDR1%
6770	Q765A7	GPI inositol-deacylase	Pgap1	0.0443059	-0.0326508	ns	1.51457e-16	-0.28574	FDR1%
6907	Q8VH49	HIG1 domain family member 1A, mitochondrial	Higd1a	0.00266815	-0.126895	ns	9.09128e-05	-0.285234	FDR1%
1352	B0K024;G3V7V2;A0A0G2JWU9		Aamp	0.248596	0.207113	ns	NA	NA	NA
1353	B0K025	Oligosaccharyltransferase complex subunit OSTC	Ostc	0.82083	0.12057	ns	0.187104	-0.13575	ns
1354	G3V996;B0K026		Letmd1	0.0673736	-0.0474922	ns	0.845297	-0.033707	ns
1355	B0K030;D3ZUU5		Dnajb1	0.418695	0.0281156	ns	0.780945	0.00221892	ns
2346	D3ZPN0		Pcdh17	5.80658e-05	0.169767	FDR1%	0.00145481	-0.146217	FDR1%
2808	D4A2K5		Nrip3	0.339895	-0.0573451	ns	3.43114e-05	-0.283788	FDR1%
136	A0A0G2JSR6;P43425	Guanine nucleotide-binding protein G(I)/G(S)/G(O) subunit gamma-7	Gng7	0.912869	-0.044272	ns	0.204482	0.0915036	ns
241	A0A0G2JUX5			7.62218e-05	0.26365	FDR1%	0.0666344	0.0471229	ns
1362	B0VXR5;Q9R237-2;Q9R237;Q9R237-3	C-Jun-amino-terminal kinase-interacting protein 1	Mapk8ip1	0.0138094	-0.0827774	ns	NA	NA	NA
1366	E9PU42;B1H223		Dscr3	0.291399	0.0096558	ns	0.0711658	0.0955503	ns
1367	B1H227		Rcc1	0.0490115	0.026173	ns	0.23022	0.0468274	ns
137	A0A0G2JSR7;P43244;B5DEM0;Q6P6H1	Matrin-3	Matr3	0.67598	-0.00415896	ns	0.711663	-0.0138078	ns
1371	B1H248;P0C0A2	Vacuolar protein-sorting-associated protein 36	Vps36	0.757937	-0.054807	ns	0.937751	-0.0202232	ns
1372	B1H257		Loh12cr1	0.248453	-0.0169325	ns	0.571931	-0.015372	ns
1374	B1H264		Tbc1d17	0.334205	0.0734008	ns	0.127846	0.121314	ns
2372	D3ZQE8		Xpo5	0.000752332	0.25505	FDR1%	0.0278499	0.146218	ns
1378	Q499V7;F1LPV8;Q68FT4;B1H270;Q5EBA9	Succinyl-CoA ligase subunit beta	Suclg2	0.131573	0.0191448	ns	0.0922588	-0.049553	ns
1379	B1H271;P0C546	Mitochondrial coenzyme A transporter SLC25A42	Slc25a42	0.13695	0.058277	ns	0.272929	-0.00823547	ns
1382	B1H2A2		Fsd1	0.836824	0.0231066	ns	0.00411832	0.0638983	ns
1383	B1H2A6;Q8K4F9		Fxr2	0.664655	0.0489243	ns	0.0292603	-0.119253	ns
2393	D3ZR52		Lpcat4	0.000733603	-0.124929	FDR1%	1.16973e-13	-0.484565	FDR1%
1388	B1WBN3;F7EV94;P11960;Q5EB89	2-oxoisovalerate dehydrogenase subunit alpha, mitochondrial	Bckdha	0.392265	-0.0275054	ns	0.0469979	-0.0767024	ns
139	A0A0G2JSS9;Q0ZHH6-2;Q0ZHH6	Atlastin-3	Atl3	0.513466	0.0446834	ns	0.414473	-0.0209618	ns
1390	B1WBQ0;O08837	Cell division cycle 5-like protein	Cdc5l	0.443349	-0.0479077	ns	0.347594	-0.062848	ns
1394	B1WBS4		Vps26b	0.0680731	0.00698532	ns	0.957237	-0.0181155	ns
1395	M0RDY2;B1WBS7		Fam185a	0.00129537	-0.128439	ns	NA	NA	NA
1398	G3V8V3;B1WBU9;P09812	Alpha-1,4 glucan phosphorylase;Glycogen phosphorylase, muscle form	Pygm	0.78556	0.0664572	ns	0.00613774	0.214008	ns
14	D4A560;A0A096MJ99		Vamp4	0.624253	0.0405015	ns	0.177614	-0.195442	ns
140	A0A0G2JSU4;Q8VBU2-2;A0A0G2JSV0;Q8VBU2	Protein NDRG2	Ndrg2	0.0255758	-0.162534	ns	0.168708	-0.0259228	ns
1400	B1WBV1		Aida	0.685647	0.0523795	ns	0.218774	0.175234	ns
1405	B1WBW4	Armadillo repeat-containing protein 10	Armc10	0.548976	-0.0072888	ns	0.0347808	0.0853914	ns
1406	B1WBW9;Q5I0K5	Mycophenolic acid acyl-glucuronide esterase, mitochondrial	Abhd10	0.615762	-0.00187012	ns	0.735371	-0.00787073	ns
1407	B1WBX6;A0A0G2K9N0		Smap2	0.131216	0.0120318	ns	0.990103	0.0138122	ns
1408	B1WBY1		Cul1	0.244116	-0.0273741	ns	0.743803	0.0164997	ns
1409	B1WBY5		Dnajc11	0.810881	0.00105964	ns	0.468904	-0.0441223	ns
6679	Q6P7R8;D3ZPU3	Very-long-chain 3-oxoacyl-CoA reductase	Hsd17b12	0.0364912	0.0703632	ns	2.78079e-08	-0.281847	FDR1%
1413	B1WC02	CTP synthase	Ctps1	0.0983897	0.0624983	ns	0.375217	-0.0774199	ns
1416	B1WC16;Q7TP73;A0A0G2K2S3;A0A0G2K1G0		Bclaf1	0.913432	-0.0116615	ns	0.389175	-0.0295492	ns
1417	B1WC18		Podxl2	0.854297	0.0157193	ns	0.0138274	-0.0604996	ns
142	A0A0G2JSW1;Q6QI25	ORM1-like protein 3	Ormdl3	0.00250617	0.314778	ns	0.108098	0.0971414	ns
1420	B1WC25		Tra2a	0.627976	0.149918	ns	0.869974	0.130824	ns
3366	F1LPB8;Q6P6S9	Ectonucleoside triphosphate diphosphohydrolase 5	Entpd5	0.00381705	0.143461	ns	3.72406e-05	-0.281714	FDR1%
1422	B1WC28	Core histone macro-H2A	H2afy2	0.269327	0.0513844	ns	0.311335	0.0247854	ns
6593	Q6IN22;P00787	Cathepsin B;Cathepsin B light chain;Cathepsin B heavy chain	Ctsb	9.09944e-11	0.25751	FDR1%	1.67522e-08	0.176926	FDR1%
1424	B1WC33		Cdc42ep4	0.00330656	-0.157621	ns	0.0295771	-0.178423	ns
4962	P52631	Signal transducer and activator of transcription 3	Stat3	0.662698	0.0794568	ns	0.000140058	-0.281559	FDR1%
143	A0A0G2JSY2;F1LPH1;P27321-4;P27321-2;P27321;D3ZL24;P27321-6;P27321-5;P27321-3;O55155;D4A129;P27321-7	Calpastatin	Cast	NA	NA	NA	0.528018	0.128052	ns
1430	B1WC49		Api5	0.61202	0.0178801	ns	0.0107876	-0.0876977	ns
1432	B1WC61;Q7TSP3		Acad9	0.0331306	-0.0249143	ns	0.0437715	-0.0412816	ns
1433	B1WC67		Slc25a24	NA	NA	NA	0.904539	-0.0161421	ns
36	A0A096MJW2;A0A0H2UHL1;Q66H50;A0A096MJJ7	Fatty acyl-CoA reductase 1	Far1	0.0921375	0.110877	ns	3.67548e-05	-0.28007	FDR1%
144	A0A0G2JSY3;P42676;A0A0G2JVK4	Neurolysin, mitochondrial	Nln	0.66861	0.0230282	ns	0.446553	-0.0321442	ns
3305	F1LMF4;Q8R508	Protocadherin Fat 3	Fat3	0.0257049	0.145812	ns	1.89393e-06	-0.279503	FDR1%
1923	D3ZAS2		Sgsm1	9.40763e-09	-0.334829	FDR1%	6.42852e-05	0.27554	FDR1%
1443	B2DD29	Serine/threonine-protein kinase BRSK1	Brsk1	0.0569939	-0.0954507	ns	0.0178077	0.113438	ns
1445	B2GUU4;Q3MIB4;Q6TXI3;F7FF30	Lon protease homolog 2, peroxisomal	Lonp2	0.139902	0.174951	ns	0.19873	0.185084	ns
1446	B2GUV0;P97694	Cytohesin-1	Cyth1	0.441766	-0.0200858	ns	0.216302	0.107704	ns
1447	B2GUV2;O55166	Vacuolar protein sorting-associated protein 52 homolog	Vps52	0.340855	0.02498	ns	0.284503	0.0693648	ns
1448	B2GUV5		Atp6v1g1	0.407572	0.0312632	ns	0.651912	0.0105228	ns
1449	M0R7Z0;B2GUV7;A0A0H2UHV4;Q4FZQ8	Eukaryotic translation initiation factor 5B	Eif5b;Eif5b-ps1	0.0231224	0.0830413	ns	0.0811078	-0.0818011	ns
1451	B2GUW4		Exd2	0.873247	-0.00896376	ns	0.0121731	0.0993571	ns
1452	B2GUX5	5-nucleotidase	Nt5c3a	0.532735	0.0490686	ns	0.107473	0.0847379	ns
6884	Q8K4Y5	Leucine-rich glioma-inactivated protein 1	Lgi1	0.00122141	-0.106429	ns	1.30631e-08	-0.278634	FDR1%
1458	M0R851;B2GUZ1	Ubiquitin carboxyl-terminal hydrolase;Ubiquitin carboxyl-terminal hydrolase 4	Usp4	0.114259	0.0569948	ns	0.61206	0.0259252	ns
4052	Q6P7A8;G3V7X5;P24054	SPARC-like protein 1	Sparcl1	0.0324886	0.0831014	ns	1.69489e-05	-0.278555	FDR1%
146	A0A0G2JSZ1;Q6GQP4;P97632	Ras-related protein Rab-31	Rab31	0.0557543	0.0554768	ns	0.107794	-0.0464141	ns
1460	B2GUZ5	F-actin-capping protein subunit alpha-1	Capza1	0.317058	0.00406395	ns	0.497791	-0.0278659	ns
1461	B2GUZ6		Rtn4ip1	0.39985	-0.0454293	ns	0.851487	-0.00187771	ns
1462	B2GUZ7		Tbcc	0.107755	-0.0848332	ns	0.331732	0.0667149	ns
1463	B2GUZ9		Fam49b	0.20963	-0.0373963	ns	0.00319783	0.0983817	ns
1464	B2GV01;Q4FZS6		Mta2	0.852637	0.0332575	ns	0.731171	0.0240931	ns
6344	Q64654	Lanosterol 14-alpha demethylase	Cyp51a1	1.22226e-06	-0.17999	FDR1%	7.91487e-19	-0.455289	FDR1%
1469	B2GV15;Q99PU6		Dbt	0.488734	-0.0316273	ns	0.0418134	-0.0760547	ns
5214	P97577	Fasciculation and elongation protein zeta-1	Fez1	NA	NA	NA	1.65928e-07	-0.278037	FDR1%
2699	D3ZZR9	Peptidyl-prolyl cis-trans isomerase	Fkbp2	0.0275841	-0.0626404	ns	1.21815e-10	-0.272682	FDR1%
1473	B2GV35		B3gat3	0.705633	0.0551711	ns	0.104943	-0.12317	ns
1474	B2GV38	Ubiquitin-like protein 4A	Ubl4a	0.127901	0.0136896	ns	0.699699	-0.0467314	ns
1475	B2GV41		Usp39	0.182036	0.0408407	ns	0.670574	-0.00879737	ns
1477	B2GV54	Neutral cholesterol ester hydrolase 1	Nceh1	0.225084	-0.00367955	ns	0.415135	-0.0271463	ns
1479	B2GV57		Cars2	0.77466	-0.0221635	ns	0.159148	-0.0394746	ns
148	A0A0G2JT00;G3V616;Q6MGD0	Protein CutA	Cuta	0.230243	0.0676742	ns	0.430462	0.0590156	ns
1480	B2GV62		Mrpl20	0.355799	0.027452	ns	0.0208556	-0.141154	ns
1482	B2GV71	NADH dehydrogenase [ubiquinone] 1 alpha subcomplex assembly factor 5	Ndufaf5	0.116062	-0.0298855	ns	0.0229441	-0.0613006	ns
1484	B2GV73	Actin-related protein 2/3 complex subunit 3	Arpc3	0.480932	-0.0233764	ns	0.0471528	0.0502803	ns
3948	G3V6S3		Calu	0.143181	-0.0473747	ns	7.51448e-05	-0.270762	FDR1%
62	A0A096MKH4;D4ABY4		Ube2j1	0.0131728	0.0706213	ns	4.68232e-05	-0.267238	FDR1%
1208	A2RRU4	Sterol regulatory element-binding protein cleavage-activating protein	Scap	0.482847	0.0566773	ns	0.000179179	-0.266972	FDR1%
149	A0A0G2JT06;A0A0G2JW80;P97834	COP9 signalosome complex subunit 1	Gps1	0.751676	-0.0115712	ns	0.460266	0.0442237	ns
6608	Q6JAM9	Transmembrane protein 35	Tmem35	0.0772739	0.179689	ns	7.37e-06	-0.266477	FDR1%
1491	B2GV89		Tbc1d19	0.485012	-0.00390073	ns	0.107141	0.0591204	ns
1492	B2GV92;P83868;Q5PQL9	Prostaglandin E synthase 3	Ptges3;Ptges3l1	0.0109035	0.035635	ns	0.708619	-0.0125127	ns
1494	B2GV94		Fam134c	0.846373	-0.0109815	ns	0.125318	0.0846567	ns
1495	B2GV96		Ccdc115	0.258204	0.0604946	ns	0.324821	0.0539932	ns
1498	B2GVB4;Q9QZR6;Q9QZR6-2;Q9QZR6-3;Q9QZR6-4;F1LN75	Septin-9	Sept9	0.313698	-0.079905	ns	0.124448	-0.0267022	ns
603	A0A0G2K2B5;A0A096MJA9;A0A096MKE0		Asph	0.537388	-0.00397204	ns	4.43067e-05	-0.264917	FDR1%
4015	G3V7J1;Q8R553	Calsyntenin-3	Clstn3	0.427492	0.0664641	ns	1.27706e-06	-0.263829	FDR1%
1506	B2RYC4;F7FG68;Q4FZS8		Syvn1	NA	NA	NA	0.00955086	-0.286647	ns
4572	P06686	Sodium/potassium-transporting ATPase subunit alpha-2	Atp1a2	0.654845	-0.00482028	ns	2.39542e-22	-0.26234	FDR1%
1510	B2RYD7;Q7TQ74		Stt3b	0.157072	0.0720908	ns	0.0220106	-0.135571	ns
4387	O08623;O08623-2;A0A0H2UHB5;O08623-3	Sequestosome-1	Sqstm1	0.036606	0.0419521	ns	3.61934e-07	-0.262098	FDR1%
1516	B2RYF7;Q3MIE3;A0A0G2K6R7;Q5M833	WAS protein family homolog 1	Wash1;Wash2	0.91317	-0.0141164	ns	0.504302	0.0499773	ns
1647	B4F773;P0C5X8	Protein tweety homolog;Protein tweety homolog 1	Ttyh1	0.338943	-0.0500031	ns	0.000136578	-0.260861	FDR1%
5798	Q5HZY2	GTP-binding protein SAR1b	Sar1b	0.000299236	0.252625	FDR1%	0.856378	-0.0124223	ns
867	A0A0G2K8D1;D4A4X7		Mospd2	NA	NA	NA	4.17456e-06	-0.256627	FDR1%
1522	B2RYI0	WD repeat-containing protein 91	Wdr91	0.299062	0.0543621	ns	0.0607873	0.128059	ns
3861	Q8CHN5;F7FJQ3		Npc2	0.00108201	0.238965	FDR1%	0.106558	0.19905	ns
4596	P08050;Q6Q6S2	Gap junction alpha-1 protein	Gja1	0.697714	0.0357495	ns	0.000115571	-0.25621	FDR1%
1526	F7ETI3;B2RYI7;D4A0P5		Wdr41	0.423101	0.0113918	ns	0.298496	0.0104346	ns
1529	B2RYJ3		Cul4a	0.37341	-0.00963518	ns	0.00646762	0.203035	ns
1531	B2RYJ7		Actr1b	0.0564393	0.0724586	ns	0.512576	0.0283745	ns
1533	B2RYK3;P18297;D3ZT59	Sepiapterin reductase	Spr	0.399132	-0.0248339	ns	0.0801965	0.101053	ns
1534	B2RYK4;Q5EB62	Solute carrier family 25 member 46	Slc25a46	0.728267	-0.104331	ns	0.78358	-0.0142984	ns
4538	P01830	Thy-1 membrane glycoprotein	Thy1	0.332991	-0.0150007	ns	6.2799e-06	-0.256065	FDR1%
1605	B2RZ79		Iscu	0.661373	-0.0283499	ns	3.27545e-14	-0.255968	FDR1%
4028	G3V7N0;Q5BJX3		Hs2st1	0.0101466	0.122398	ns	4.0711e-09	-0.25564	FDR1%
1543	B2RYN1		Fn3krp	0.527021	-0.0304301	ns	0.437637	0.0745694	ns
4958	P52020;Q8CJ80	Squalene monooxygenase	Sqle	0.548049	-0.0281773	ns	2.91441e-08	-0.254753	FDR1%
1545	B2RYN6;Q8R525		Ap1g1	0.0127636	-0.0450126	ns	0.295457	0.0242966	ns
1546	B2RYP0;A0A0G2K6E0		Rhoc	0.325453	0.00232695	ns	0.0975746	-0.149539	ns
1547	B2RYP3		Fam91a1	0.575603	-0.0484654	ns	0.00266621	0.099392	ns
1548	B2RYP4		Snx2	0.1889	0.0342226	ns	0.33137	0.033084	ns
1550	B2RYP6		Luc7l2	0.502513	0.0579279	ns	0.434614	0.00344805	ns
1551	B2RYP8		Tubgcp2	0.903001	0.0479405	ns	0.276796	0.0416498	ns
1553	B2RYQ2	Serine/threonine-protein phosphatase 2A activator	Ppp2r4	0.735261	0.0112348	ns	0.0552402	0.121455	ns
1554	B2RYQ5;A0A0G2KAN5;D4A5C2	Enhancer of rudimentary homolog	Erh;RGD1307595	0.149085	-0.042577	ns	0.00464947	-0.0780601	ns
1555	B2RYQ8;P83883	60S ribosomal protein L36a	Rpl36a	0.0229834	0.0617303	ns	0.106591	-0.0771397	ns
1279	B0BN65		Fam49a	1.08588e-07	0.163593	FDR1%	8.60138e-14	-0.248896	FDR1%
1558	B2RYR9;Q9Z336	Dynein light chain Tctex-type 1	Dynlt1	0.0875566	0.096164	ns	0.337003	0.0218348	ns
1559	B2RYS0;P35171	Cytochrome c oxidase subunit 7A2, mitochondrial	Cox7a2	0.00292926	-0.167699	ns	0.00342076	-0.274414	ns
1561	B2RYS2	Cytochrome b-c1 complex subunit 7	LOC685596	0.0772385	-0.0630452	ns	0.0900959	-0.0585286	ns
1563	B2RYS8		Ndufb8	0.585419	-0.0243289	ns	0.417644	-0.0598555	ns
1565	B2RYT0;M0R3S1		Mrps21;LOC100911433	0.467555	0.0213246	ns	0.643474	-0.0775536	ns
1567	B2RYT5;D3ZYX8		Cox7a2l	0.0467389	-0.0999766	ns	0.0216257	-0.169153	ns
1568	B2RYT7		Hdhd3	0.1195	-0.0232293	ns	0.22855	-0.0800595	ns
1569	D4A601;B2RYT9	Translational activator of cytochrome c oxidase 1	Taco1	0.261414	-0.0207495	ns	0.906839	0.00823074	ns
2585	D3ZWL6	Adenosylhomocysteinase	Ahcyl2	0.0468147	-0.0597728	ns	5.43087e-15	-0.254218	FDR1%
1571	B2RYU6	Trafficking protein particle complex subunit 2-like protein	Trappc2l	0.70753	0.00454779	ns	0.488162	0.0215803	ns
1572	B2RYU7		Cbx5	0.495053	-0.00720841	ns	0.364859	0.117577	ns
1573	G3V950;B2RYU8	LYR motif-containing protein 1	Lyrm1	0.531026	0.0178759	ns	0.575275	0.0026509	ns
1576	B2RYV5;G3V6C3		RGD1562502;Pbdc1	0.00130061	0.118698	ns	0.975416	0.0392169	ns
1578	B2RYW3		Ndufb9	0.797374	-0.0145105	ns	0.569825	-0.0416151	ns
1579	B2RYW4		Mrpl53	0.112713	-0.0273309	ns	0.0313594	-0.0819227	ns
1580	B2RYW7		Srp14	0.33811	0.060081	ns	0.00560844	-0.12765	ns
1581	B2RYW8	MICOS complex subunit Mic10	Minos1	0.0245604	0.320995	ns	0.127549	0.126012	ns
5490	Q4FZY0	EF-hand domain-containing protein D2	Efhd2	0.0154606	0.0763143	ns	3.95784e-13	-0.252454	FDR1%
1583	B2RZ08		Tmem263	0.275179	0.00388749	ns	0.184074	-0.0612142	ns
3387	F1LPQ9;Q5U301;A0A096MJ48	A-kinase anchor protein 2	Akap2	2.83605e-10	-0.221341	FDR1%	1.79144e-14	-0.394403	FDR1%
2706	D3ZZX1		Inpp5a	0.218209	0.0395149	ns	2.06654e-08	-0.251141	FDR1%
1593	B2RZ37	Receptor expression-enhancing protein 5	Reep5	0.610885	-0.029025	ns	0.977752	-0.0170492	ns
1596	B2RZ62;G3V9Y9		Ap3s1	0.964037	0.0107784	ns	0.967821	0.036674	ns
1597	F7EY92;B2RZ64		Mbd3	0.24016	0.0649973	ns	0.0281124	0.0821273	ns
1600	B2RZ68		Dcaf7	0.51218	0.0105613	ns	0.52374	0.0136568	ns
1602	B2RZ72		Arpc4	0.526944	-0.0514523	ns	0.898332	0.054855	ns
1603	B2RZ74;D3Z8H0		Snrnp70	0.823283	-0.00360385	ns	0.215023	-0.137376	ns
4436	O35547	Long-chain-fatty-acid--CoA ligase 4	Acsl4	0.00949809	-0.0603394	ns	4.3416e-29	-0.251101	FDR1%
1608	B2RZ97;F1LRJ0;A0A0G2JX46		Kcmf1	0.0369032	-0.0829957	ns	0.923323	-0.0677816	ns
1609	B2RZA2;M0R8C5;A0A1B0GWR1		Eri3	0.856956	0.0426033	ns	0.44158	-0.00749904	ns
161	A0A0G2JT93;Q9WU82;B6DMG1	Catenin beta-1	Ctnnb1	0.00120068	-0.0843369	ns	0.0835626	-0.0351875	ns
6719	Q6QIX3;Q6QIX3-2	Zinc transporter 3	Slc30a3	0.00413162	-0.0859346	ns	4.50011e-10	-0.250708	FDR1%
2072	D3ZF54	Anoctamin	Ano10	0.937311	0.016609	ns	1.39605e-11	-0.250007	FDR1%
1614	B2RZB6		Lsm8	0.811223	-0.0246571	ns	0.609683	-0.00978213	ns
1615	B2RZB7		Snrpd1	0.332154	-0.0171193	ns	0.0205836	-0.0917814	ns
1617	B2RZC6		Ilf2	0.552289	-0.0480463	ns	0.606805	-0.0325124	ns
162	A0A0G2JTA0;Q5BK32	FAS-associated factor 2	Faf2	0.506238	0.0328557	ns	0.0205929	-0.0315021	ns
1620	B2RZD1		Sec61b	0.00481055	0.102144	ns	0.289939	-0.0996438	ns
1621	B2RZD2	Complex I assembly factor TMEM126B, mitochondrial	Tmem126b	0.978374	-0.0645906	ns	NA	NA	NA
1622	F1LQ14;D4A4W9;B2RZD4;P11250	60S ribosomal protein L34	Rpl34;Rpl34-ps1	0.032968	0.103801	ns	0.0159258	-0.14876	ns
1623	D3ZSF9;B2RZD5		Rpl22l2;LOC688712	0.789635	0.0858583	ns	0.00403476	-0.322013	ns
3555	F1LWG2		Prmt8	0.0121007	-0.0936891	ns	2.55762e-11	-0.248776	FDR1%
1625	B2RZD7	LYR motif-containing protein 9	Lyrm9	0.384631	-0.0746943	ns	0.0838346	-0.141612	ns
1628	B3DM92;Q7TMB0	Lipid phosphate phosphatase-related protein type 3	Lppr3	0.495385	0.00804271	ns	NA	NA	NA
163	A0A0G2JTA1;D3ZHI9		Ppp2r5e	0.819181	-0.0317117	ns	0.181108	0.0362095	ns
1630	B3DM95;P04550	Parathymosin	Ptms	0.860907	-0.0785777	ns	NA	NA	NA
1631	B3DM96;P80201;A0A0G2K2P7	Serine/threonine-protein kinase receptor;Activin receptor type-1	Acvr1	0.38813	0.0825118	ns	0.201542	0.109644	ns
1632	B3DMA0	Tumor protein p53-inducible protein 11	Tp53i11	0.069545	0.0171743	ns	0.89183	-0.0261157	ns
1638	B3IYD2;Q6BBI8	Ubiquitin-fold modifier-conjugating enzyme 1	Ufc1	0.355396	0.0443359	ns	0.291636	0.0442716	ns
1066	A0A0H2UHV9;D4ABY2	Coatomer subunit gamma-2	Copg2	0.00449275	0.124038	ns	0.00062146	-0.246545	FDR1%
1640	B3SVE9;Q64232	Very-long-chain enoyl-CoA reductase	Tecr	0.163465	0.0561068	ns	0.0125396	-0.146549	ns
1641	Q7TPJ6;B4F759;P83871	PHD finger-like domain-containing protein 5A	Phf5a	0.504906	0.00367239	ns	0.181278	-0.0966112	ns
1643	B4F764;Q4KM65	Cleavage and polyadenylation specificity factor subunit 5	Nudt21	0.0130239	-0.0775286	ns	0.0244165	-0.0630973	ns
1645	B4F768;A0A0G2JVM0		Aldh4a1	0.755065	0.0246161	ns	0.458754	-0.025536	ns
5808	Q5I0F0		Drg1	0.0545187	-0.0908215	ns	2.07468e-05	-0.246153	FDR1%
1648	B4F774		Gdap1l1	0.305028	-0.0379208	ns	0.0443593	0.0416742	ns
147	A0A0G2JSZ5;Q63081;D3ZK65	Protein disulfide-isomerase A6	Pdia6;LOC685171	0.13666	-0.0371702	ns	3.95867e-20	-0.242957	FDR1%
1655	B4F7A1	Complex III assembly factor LYRM7	Lyrm7	0.216696	-0.064069	ns	0.247072	0.00613429	ns
1656	B4F7A2;F1M943		Armc8	0.345214	-0.0222534	ns	0.257997	-0.0322488	ns
1657	B4F7A3	Galectin	Lgalsl	0.860566	-0.0238609	ns	0.099714	0.165545	ns
346	D3ZZ32;A0A0G2JX67;Q5HZA6-2;Q5HZA6	Prolyl endopeptidase-like	Prepl	0.00691095	0.119046	ns	9.66118e-05	-0.241192	FDR1%
1660	B4F7A9		Csnk2a2	0.837416	-0.00703071	ns	0.00349831	-0.0345075	ns
6187	Q62797;Q64641	Protein-tyrosine-phosphatase	Ptpro	3.37261e-05	0.248162	FDR1%	0.00101083	0.222639	FDR1%
4307	M0R8T1;A0A0G2JZE4;F1M7H7;Q4L1J4-2;Q4L1J4	Membrane-associated guanylate kinase, WW and PDZ domain-containing protein 1	Magi1	0.0243798	-0.104678	ns	2.36587e-08	-0.240587	FDR1%
1666	B4F7D9;P28570	Transporter;Sodium- and chloride-dependent creatine transporter 1	Slc6a8	0.44779	0.0975906	ns	NA	NA	NA
5994	Q5U2R7	LDLR chaperone MESD	Mesdc2	0.0303557	-0.0521058	ns	5.86562e-10	-0.24055	FDR1%
167	A0A0G2JTF2;Q6P730;A0A0G2JTS0	Disabled homolog 2-interacting protein	Dab2ip	0.175699	-0.0403178	ns	0.48288	0.0477678	ns
1671	B4F7E8;Q3MHT9	Niban-like protein 1	Fam129b	0.00163251	0.229022	ns	NA	NA	NA
1672	B4F7F3		Arvcf	0.178537	-0.121062	ns	0.0033428	0.184542	ns
3444	F1LRI5;B5DFK9		Gcn1l1	4.48113e-19	0.22909	FDR1%	0.701026	-0.0434593	ns
1680	B5DEI0		Pcyox1l	0.153338	0.0541794	ns	0.573259	-0.02626	ns
1681	B5DEJ5;D3Z9S4		Eefsec	0.150177	0.0917223	ns	NA	NA	NA
1686	D4A0H5;B5DEL2		Cpsf1	0.134367	0.100941	ns	NA	NA	NA
1688	B5DEL7		LOC100363239	0.0291888	0.14352	ns	0.279482	-0.00975946	ns
1689	B5DEL8;A0A0G2JZJ9		LOC100361505	0.661199	-0.0545586	ns	0.0636612	-0.0534096	ns
169	A0A0G2JTG7;Q8VHV7;Q8VHV7-2;Q499R8;G3V9Q3;Q8VHV7-3	Heterogeneous nuclear ribonucleoprotein H;Heterogeneous nuclear ribonucleoprotein H, N-terminally processed	Hnrnph1	0.00178436	0.0806883	ns	0.6832	0.0217219	ns
4101	G3V8G5;Q62638	Golgi apparatus protein 1	Glg1	0.316935	0.000884735	ns	6.53844e-38	-0.240407	FDR1%
1691	G3V6N2;B5DEM3;A0A0G2K8M5		Tmed4	0.0504834	0.169314	ns	0.466526	-0.00102394	ns
1692	F1LSW7;B5DEM5;Q63507;D3ZHE6	60S ribosomal protein L14	Rpl14;LOC680579	0.00187282	0.086962	ns	0.0428964	-0.096234	ns
6629	Q6MG82	Proline-rich transmembrane protein 1	Prrt1	1.60984e-07	-0.316747	FDR1%	0.000120763	0.136058	FDR1%
3346	F1LNL3;Q80ZB2		Abca1	3.10328e-05	0.223171	FDR1%	0.12643	0.10427	ns
1697	B5DEP7;A0A0G2K3V8		LOC100911683	0.511955	-0.0576527	ns	0.140481	-0.139788	ns
1698	G3V9W4;B5DEQ3	Probable Xaa-Pro aminopeptidase 3	Xpnpep3	0.383687	-0.0311933	ns	0.0161797	-0.0793615	ns
1700	B5DER3;Q711G3	Isoamyl acetate-hydrolyzing esterase 1 homolog	Iah1	0.966576	-0.0190689	ns	0.557289	0.0718271	ns
1702	B5DES0;M0R8K2		Snrpd2;Snrpd2l	0.476582	-0.0276643	ns	0.0956798	-0.0830481	ns
6321	Q642B0		Gpc4	0.0912888	-0.0527968	ns	5.5333e-12	-0.240075	FDR1%
1704	B5DEX3		Cpne8	0.440288	0.12561	ns	0.0122102	-0.2253	ns
1707	B5DEY8		Snx6	0.0471097	0.0609733	ns	0.371195	-0.00751152	ns
1709	B5DEZ4;D3ZTL0		Tcerg1	0.200347	0.0808358	ns	0.395897	-0.057282	ns
1710	B5DEZ6	Glucosamine-6-phosphate isomerase	Gnpda2	0.447653	-0.111812	ns	0.923241	-0.0217485	ns
1712	B5DF01;D3ZTB4		Vps11	0.384538	0.0428083	ns	0.0417901	0.0667603	ns
1714	B5DF03;G3V6L9	Peptidyl-prolyl cis-trans isomerase	Fkbp3	0.00827924	-0.115189	ns	0.282312	0.0696769	ns
1717	B5DF14;F7ESR8		Lgi2	0.0114858	0.178427	ns	0.00312218	-0.35475	ns
112	A0A0G2JSJ8;P17164	Tissue alpha-L-fucosidase	Fuca1	0.000174642	0.218849	FDR1%	0.0110374	0.126377	ns
5872	Q5NDF0	Protein O-linked-mannose beta-1,4-N-acetylglucosaminyltransferase 2	Pomgnt2	0.0545095	0.0457518	ns	2.88268e-07	-0.238748	FDR1%
6418	Q68FS8		Rtcd1	0.000130331	0.210586	FDR1%	0.0322252	0.195068	ns
1729	B5DF51	Membrane magnesium transporter 1	Mmgt1	0.130019	0.19789	ns	0.912006	-0.0105662	ns
1730	F7EUJ8;B5DF52		C1qtnf4	0.143036	0.104903	ns	0.00404432	-0.201338	ns
5026	P61023	Calcineurin B homologous protein 1	Chp1	0.0646856	0.073479	ns	5.45167e-09	-0.238176	FDR1%
1732	B5DF60;Q566D5;A0A0G2JVA7;Q6VV72	Eukaryotic translation initiation factor 1A	Eif1ax;Eif1a	0.220705	0.0959923	ns	0.354729	-0.0097184	ns
2102	D3ZG48;Q5BJM0		Ddx50	0.713485	0.123808	ns	0.000850996	-0.236032	FDR1%
5854	Q5M963;P69060	N-acylneuraminate cytidylyltransferase	Cmas	1.46396e-07	0.209163	FDR1%	0.608763	-0.0259871	ns
1739	B5DF89;A0A0G2JSP3	Cullin-3	Cul3	0.905437	0.00809631	ns	0.346853	0.0528899	ns
1740	B5DF91	ELAV-like protein	Elavl1	0.161312	0.0338618	ns	0.844035	-0.00919782	ns
1136	A0A140UHX6;Q6XDA0		Sptb	3.07485e-12	-0.3074	FDR1%	0.00153955	0.149809	FDR1%
3465	F1LRY8;Q63366;F1LWT9	Neurexophilin-1;Neurexophilin	Nxph1;Nxph2	NA	NA	NA	0.000139174	-0.235727	FDR1%
1745	B5DFB4;F1LUY5;A0A0G2JXJ6		Ttc7b	0.443422	0.00536772	ns	0.410062	-0.0555502	ns
1747	B5DFC3;A0A0G2JZM2		Sec23a	0.883294	-0.0135376	ns	0.010509	0.0566941	ns
3316	F1LMU7;F1LNE8;P23576	Gamma-aminobutyric acid receptor subunit alpha-2	Gabra2	0.210404	-0.0406222	ns	1.59017e-06	-0.232953	FDR1%
1749	B5DFC6;M0RCH5	Glucosamine-6-phosphate isomerase	Gnpda1	0.329743	-0.0320021	ns	0.25972	-0.00699051	ns
1795	C6JUM5		Pcdhgc5	0.859049	0.019428	ns	4.10022e-07	-0.231679	FDR1%
1751	F7F163;B5DFD1		Nudcd1	0.586424	0.122494	ns	0.0333573	-0.0367756	ns
4431	O35394	Prenylated Rab acceptor protein 1	Rabac1	NA	NA	NA	0.000169629	-0.229198	FDR1%
2568	D3ZWA1		Fam63b	0.343582	-0.061273	ns	9.80072e-06	-0.228631	FDR1%
1754	B5DFF4		Vps37c	0.455349	0.0657172	ns	0.874633	-0.00592829	ns
1755	B5DFF7;G3V9L3;A0A0G2K3I9		Dusp3	0.163997	-0.063599	ns	0.650318	0.0151632	ns
1759	B5DFI3		Ap1s1	0.0719086	-0.0828991	ns	0.237246	0.0413505	ns
176_m	A0A0G2JTK6;D3ZPH3			0.198469	0.0884384	ns	0.84921	-0.0255311	ns
1761	B5DFI9		Pdk3	0.326085	-0.0342968	ns	0.0319135	-0.0613394	ns
1762	B5DFJ1		Nkiras1	0.146122	0.0842258	ns	0.857819	-0.0640177	ns
1764	B5DFJ3;G3V9M1		Ddx23	0.384675	0.0332904	ns	0.455604	-0.0562429	ns
1765	B5DFJ4		Vps18	0.803446	0.0192753	ns	0.336086	0.0653473	ns
1768	B5DFK0;G3V7N6		Mboat7;LOC100909580	0.427766	0.050665	ns	0.0163959	-0.0500208	ns
1769	B5DFK5;F1LML7;Q99PW9		Hip1r	0.00305694	0.0905134	ns	0.00526244	-0.150059	ns
2689	D3ZZK3	Receptor protein-tyrosine kinase	Epha4	6.75063e-07	-0.273958	FDR1%	8.48539e-05	0.0886871	FDR1%
1770	B5DFK6;Q5RK16;Q4FZT4		Ap3d1	0.364242	-0.0133478	ns	0.139603	0.0238017	ns
1773	B5DFL0;Q498T0		Snta1	0.606534	0.0236901	ns	0.875407	0.00577444	ns
1774	B5DFL5		Sap30bp	NA	NA	NA	0.769354	-0.0269958	ns
3032	D4A8T3		Copz1	0.254398	0.00935307	ns	1.09292e-05	-0.228533	FDR1%
1776	B5DFM8		Bcas2	0.136224	-0.0195665	ns	0.758247	-0.0298223	ns
1778	B5DFN2;A0A140TAI8	Adenosylhomocysteinase	Ahcyl1	0.309509	-0.0274141	ns	0.895155	-0.0326824	ns
1779	B5DFN3;D3Z949	Ubiquinol-cytochrome-c reductase complex assembly factor 2	Uqcc2;RGD1561671	0.047419	-0.0444369	ns	0.154598	-0.0504481	ns
1384	B1VKB4;Q9Z327-3;Q9Z327-2;A0A0H2UHQ9;Q9Z327	Synaptopodin	Synpo	3.22494e-23	-0.444328	FDR1%	2.62351e-08	-0.371996	FDR1%
1780	B5DFN4		Pfdn5	0.287438	0.0236326	ns	0.848405	0.0310067	ns
2868	D4A4H5		Sdf2	0.373417	0.0367607	ns	5.90902e-07	-0.224755	FDR1%
1782	B6DYP8;Q9JLX3;P04904;A0A0G2JVT2;A0A0G2K8Q5;A0A0G2JTB1;P46418;F7F2H5;Q4FZZ3;B6DYP7;P04903;P00502;Q498T5;Q63232	Glutathione S-transferase;Glutathione S-transferase alpha-3;Glutathione S-transferase alpha-5;Glutathione S-transferase alpha-2;Glutathione S-transferase alpha-1;Glutathione S-transferase alpha-1, N-terminally processed	Gsta1;Gsta3;Gsta5;Gsta2	0.23685	-0.0508711	ns	0.725342	-0.0295186	ns
1783	B6DYQ0;P24473	Glutathione S-transferase kappa 1	Gstk1	0.516305	0.00165297	ns	0.868358	0.0185959	ns
1784	B6DYQ4;P08011	Microsomal glutathione S-transferase 1	Mgst1	0.744372	-0.0817786	ns	0.70673	0.00139957	ns
1785	B6DYQ5;Q9Z339;Q6AXR6;A0A096MJ04	Glutathione S-transferase omega-1	Gsto1	0.988372	0.0942302	ns	0.513999	0.0124301	ns
1786	B6DYQ7;P04906;D4A8S2;A0A0G2K4Q5	Glutathione S-transferase P	Gstp1;RGD1307603	0.92401	2.27428e-05	ns	0.0178868	0.110316	ns
1790	B7X6I3;Q5FVI4	Cell cycle exit and neuronal differentiation protein 1	Cend1	0.567194	-0.0646666	ns	0.0760131	-0.0404683	ns
1792	C0IXW5;C0IXW6;E9PTY6;A0A096MIW7		Fry	0.19534	0.14551	ns	0.0370773	-0.0935103	ns
3702	F1M6P8		Edil3	5.46242e-12	0.244097	FDR1%	6.76104e-05	0.0970485	FDR1%
5058	P62275	40S ribosomal protein S29	Rps29	0.0446492	-0.0545006	ns	4.15977e-05	-0.220621	FDR1%
1797	C6ZII9;B2RZ31		Sirt3	0.0978903	-0.0671653	ns	0.35152	-0.0301317	ns
1517	G3V828;B2RYF8		Cnpy3	0.570848	-0.00360071	ns	4.53243e-07	-0.219902	FDR1%
1799	C9E895;P18088;B3VQJ0;Q63211	Glutamate decarboxylase 1	Gad1	0.181618	0.0472685	ns	0.740006	0.146146	ns
191	A0A0G2JTT6			0.22321	0.0235289	ns	0.000275419	-0.218693	FDR1%
181	A0A0G2JTM9			0.136295	-0.0839157	ns	0.0193428	-0.10017	ns
183	A0A0G2JTN4;D4AB17		LOC100912917	0.92846	0.0274836	ns	0.0837796	0.0689309	ns
184	M5AJY0;A0A0G2JTP7;Q4KLY4;F7IXA2;Q6MGB6-2;Q6MGB6	E3 ubiquitin-protein ligase RING2;E3 ubiquitin-protein ligase RING1	Rnf2;Ring1	NA	NA	NA	0.883881	0.0107767	ns
1842	D0RB01;A0A0G2QC35;F1LSW9	Ubiquitin carboxyl-terminal hydrolase	Usp12;LOC100912059	0.723911	-0.0372943	ns	0.57177	0.0972023	ns
1844	D2XV59	GTP-binding protein 1	Gtpbp1	0.0135751	0.16866	ns	0.109007	0.0850266	ns
1845	D3KR63;F1LQ26;Q9Z1C7	Rap guanine nucleotide exchange factor 4	Rapgef4	0.65657	-0.0771466	ns	0.818835	-0.00756507	ns
1850	D3Z865		Mpdu1	0.681763	0.0374994	ns	0.0367176	-0.109449	ns
1852	D3Z8B2		Nup133	0.310899	-0.0370046	ns	0.0885217	0.0459938	ns
1853	D3Z8C7;A0A0G2KAW5		Wdr48	0.933358	-0.031603	ns	0.25658	0.0454696	ns
3364	F1LPA3;Q76M68	IQ motif and SEC7 domain-containing protein 3	Iqsec3	0.00017558	-0.102514	FDR1%	2.00128e-25	-0.356356	FDR1%
1857	D3Z8E6;A0A0G2K5T1	Calmodulin-regulated spectrin-associated protein 1	Camsap1	0.312768	-0.0539333	ns	0.711253	-0.013569	ns
186	A0A0G2JTR4;A0A0G2JZZ7			0.494599	-0.0113847	ns	0.118161	0.0620541	ns
4130	G3V8T3;P55266	Double-stranded RNA-specific adenosine deaminase	Adar	0.952518	0.0129752	ns	7.85796e-05	-0.218427	FDR1%
1868	D3Z8R4;F1LT30		Rbm25l1;Rbm25	0.00768333	0.122301	ns	0.700882	-0.0488464	ns
187	A0A0G2JTS3;B2RZ78;B2RZ78-2	Vacuolar protein sorting-associated protein 29	Vps29	0.703572	-0.00342503	ns	0.772465	0.0112022	ns
1870	D3Z900;O88994;M0R6N2	Mitochondrial amidoxime reducing component 2	Marc2;LOC100910481	0.361068	-0.0594536	ns	0.508034	-0.0278807	ns
3673	F1M4H5		Nova2	0.000223803	0.206207	FDR1%	0.708823	-0.0283909	ns
3991	G3V784;Q5D001		Adpgk	0.000351612	0.204965	FDR1%	0.912104	-0.00684336	ns
6226	Q63151;Q63151-2	Long-chain-fatty-acid--CoA ligase 3	Acsl3	0.00189877	0.083153	ns	2.63571e-14	-0.217503	FDR1%
1881	D3Z9C0		Mios	0.72179	0.0215271	ns	0.567774	-0.0481765	ns
1882	D3Z9D0		RGD1306271	0.433623	-0.063112	ns	0.832925	0.0583402	ns
4832	P31016;A0A0G2K7F5;P97630	Disks large homolog 4	Dlg4	5.2414e-13	-0.27116	FDR1%	1.12465e-06	0.138989	FDR1%
1888	D3Z9I1		Coa3	0.0972384	0.0395143	ns	0.00891453	-0.0583264	ns
189	A0A0G2JUQ5;Q498N4;A0A0G2JTT2;O55012;Q66WT9;O55012-2	Phosphatidylinositol-binding clathrin assembly protein	Picalm	0.0251311	-0.169683	ns	0.475695	0.0570599	ns
1994	D3ZCV0		Actn2	1.427e-25	-0.257951	FDR1%	8.22427e-29	-0.335468	FDR1%
1893	D3Z9L5		Wdr11	0.212859	-0.0507722	ns	0.0159873	0.139866	ns
1897	D3Z9Z0		Ank1	0.105119	-0.0442615	ns	0.00321753	-0.148219	ns
2943	D4A6G6;P17074;A0A0H2UI38;F1M8C7;F1M764;D3ZGN8;F1LYF3;D3ZUD7;D3ZSH6	40S ribosomal protein S19	LOC100362339;Rps19;Rps19l1;LOC687298;LOC100360843	0.223164	-0.0205655	ns	4.01798e-12	-0.216902	FDR1%
1900	D3ZA31		Mtmr2	0.599628	-0.0175004	ns	0.100293	0.0505207	ns
1905	D3ZA84;D3ZE09;D4A3B0;D3ZT58		Tln2	0.00465347	-0.0366553	ns	0.00968613	0.0426908	ns
1906	D3ZA85		Nfu1	0.0393157	-0.0723877	ns	0.0112317	-0.103354	ns
1907	D3ZA93		Acot13	0.440611	-0.0317562	ns	0.715713	-0.0226255	ns
6896	Q8R4A1;Q8R4A1-2	ERO1-like protein alpha	Ero1l	0.000750244	-0.0689435	FDR1%	1.28472e-20	-0.33493	FDR1%
1909_m	Q63374;Q63374-2;Q63374-3;Q63374-4;Q63374-5;Q63374-6;Q63374-7;Q63374-8;Q63374-9;Q63374-10;D3ZAD6;D3ZTM0	Neurexin-2	Nrxn2	0.0169564	-0.0573518	ns	0.307904	0.0517555	ns
576	A0A0G2K1Q8;Q5M866		Abca3	0.106211	0.0651319	ns	1.96088e-06	-0.216372	FDR1%
1910	D3ZAF6	ATP synthase subunit f, mitochondrial	Atp5j2	0.380616	-0.0108549	ns	0.474088	-0.0287693	ns
1914	D3ZAI0;D4A4B4		U2surp	0.00300753	0.0944618	ns	0.713481	-0.0196218	ns
6959	Q99MI5		LOC100912604	6.76117e-10	0.203641	FDR1%	0.672241	0.0188028	ns
4119	G3V8Q1;B1WBX7;A0A0U1RRT4		Cope	0.092191	0.0725764	ns	1.15733e-05	-0.209354	FDR1%
4910	P46933-2;P46933;A0A0G2K3S1	Amyloid beta A4 precursor protein-binding family B member 1	Apbb1	0.0015552	-0.227506	ns	0.00119401	-0.208737	FDR1%
1919	D3ZAQ0		Fundc2	0.495695	-0.125989	ns	0.0169886	-0.219555	ns
1886	D3Z9H2		Hapln4	1.21189e-05	-0.270177	FDR1%	0.000466237	0.411456	FDR1%
1924	D3ZAS8		Sart3	0.393777	0.0394402	ns	0.943429	-0.0829522	ns
1929	D3ZAW2;A0A0G2K0F9;A0A0G2JTF7		Pisd	0.328833	-0.074779	ns	0.0167956	-0.0819411	ns
1931	D3ZAX5		Cherp	0.0813246	0.0803738	ns	0.708774	-0.0295444	ns
1933	D3ZAY8		Pnn	0.108717	0.0305943	ns	0.00815993	0.20156	ns
1934	D3ZAZ0	Eukaryotic translation initiation factor 3 subunit M	Eif3m	0.796837	-0.0171573	ns	0.0624637	-0.144071	ns
1936	D3ZB51		Igsf9b	0.299621	-0.0889872	ns	NA	NA	NA
1938	D3ZB78		RGD1559864	0.00388996	-0.0748202	ns	0.31459	-0.0103565	ns
194	A0A0G2JTW1			0.664141	-0.000486658	ns	0.359403	-0.040799	ns
1944	D3ZBE5;A0A0G2JUP0	Serine/threonine-protein kinase Nek7	Nek7	0.291487	0.110718	ns	0.0406239	-0.0690308	ns
63	A0A096P6L7;M0R4L3;A0A0A0MP84;Q2M2R8;A0A0H2UHI4	Peroxisomal targeting signal 1 receptor	Pex5	0.0109189	0.0988532	ns	3.25078e-06	-0.208501	FDR1%
1948	D3ZBL6		Nup160	0.863242	0.0318449	ns	0.270303	0.0202853	ns
1949	D3ZBM3	Ferrochelatase	Fech	0.0136825	-0.0536404	ns	0.0185561	-0.0731388	ns
195	A0A0G2JTX2			0.912113	0.0203207	ns	0.0569433	-0.110342	ns
1951	D3ZBN0	Histone H1.5	Hist1h1b	0.192708	-0.0423992	ns	0.815014	0.0140296	ns
1958	D3ZBT9;F1MAH5;B6ID03		Ppp6r3	0.919974	-0.0336225	ns	0.110794	0.0388816	ns
981	A0A0G2KAW2;Q5JCS7;O35412;F1LS65;A0A0G2K2Z9;D3ZQP5	Signal-induced proliferation-associated 1-like protein 1	Sipa1l1	1.51952e-07	-0.146903	FDR1%	2.27418e-26	-0.319993	FDR1%
1962	D3ZBZ6		Disp2	0.881964	-0.0219145	ns	0.00626933	-0.426084	ns
1964	D3ZC07;A0A0G2JZ66;B0BMV1;A0A0G2JSU3;Q63945-2;Q63945;Q6UN82;D4A466;Q6QI56;A0A0G2K5L9	Protein SET	Pkn3;Set;Setl1;RGD1563307;LOC317165	0.0417794	0.0939155	ns	0.209625	-0.0691553	ns
1966	D3ZC15		Rltpr	0.709445	-0.0294356	ns	0.137294	0.189174	ns
5405	Q3KRF2;Q9Z1A6;Q6P513	Vigilin	Hdlbp	0.383381	-0.00134655	ns	4.83539e-17	-0.207424	FDR1%
2476	D3ZTR5;Q5BJB3;M0R785;A0A0G2K6U2		Zbed5;Chchd2	0.000764381	0.159283	FDR1%	2.0664e-05	-0.268516	FDR1%
1969	D3ZC63		Cmpk2	0.950077	-8.73345e-05	ns	0.0621674	-0.128422	ns
1971	D3ZC82;M0R4K6		LOC687994;RGD1564405	0.107422	-0.0429968	ns	0.0167077	-0.122899	ns
1972	D3ZC89		Fam114a2	0.133646	-0.0857983	ns	0.66873	0.0591244	ns
1974	D3ZCA0		Prosc	0.924758	-0.00871004	ns	0.0691335	-0.0381304	ns
1977	D3ZXD2;D3ZCF8		Abca8a	0.0868923	0.0511843	ns	0.475671	-0.0469087	ns
1978	D3ZYN2;D3ZCG2;D3ZSN6;D3ZJJ7;D4A1V5;D4ADI4	Kinesin-like protein	Kif21a	0.0249331	-0.0509784	ns	0.101837	0.0225047	ns
6595	Q8CJH4;Q6IN37		Gm2a	0.000218718	0.244043	FDR1%	9.72746e-05	0.261157	FDR1%
198	A0A0G2JTY6;F1LRK4;Q3SYP9		Grsf1	0.0192195	-0.0712976	ns	0.0373755	-0.0522922	ns
1987	D3ZCL3	U1 small nuclear ribonucleoprotein C	Snrpc	0.220344	-0.0788815	ns	0.050818	-0.116355	ns
1989	D3ZCQ2		Alg11	0.801854	0.0348864	ns	0.0627675	0.0868476	ns
1991	D3ZCS3		Pcbp4	0.798023	0.0366074	ns	0.793336	-0.0217116	ns
1993	D3ZCU8		Rab33a	0.00260998	-0.111051	ns	0.629347	0.0287232	ns
4722	P17105	Inositol-trisphosphate 3-kinase A	Itpka	1.94794e-16	-0.306793	FDR1%	2.67683e-15	-0.309632	FDR1%
212	A0A0G2JUB0;Q810F4	Protein FAM3C	Fam3c	0.834739	-5.16282e-05	ns	1.10302e-09	-0.207393	FDR1%
5074	P62762;Q56A29	Visinin-like protein 1	Vsnl1	5.6233e-08	-0.152161	FDR1%	8.90256e-26	-0.287128	FDR1%
2	Q99JC6;A0A023IM54;A0A0U1RS43		Tapbp	0.181759	0.0745296	ns	0.416265	-0.0321201	ns
6998	Q9ER24	Ataxin-10	Atxn10	1.67765e-12	0.191897	FDR1%	0.0034974	-0.0461167	ns
6981	Q9EPB1	Dipeptidyl peptidase 2	Dpp7	2.57233e-13	0.194008	FDR1%	1.61795e-22	0.275506	FDR1%
2002	D3ZD48		Rab11fip2	0.84809	-0.0502319	ns	0.672653	0.012447	ns
3996	G3V7B0;Q4G021		Nol9	0.000864611	0.191337	FDR1%	0.0899209	0.0647681	ns
2008	D3ZD89;M0RC73		Naa15;Naa16	0.0015521	0.189767	ns	0.979281	0.0300314	ns
4004	G3V7G8;Q5I0G4	Glycine--tRNA ligase	Gars	1.06309e-12	0.181333	FDR1%	0.366676	0.00175097	ns
6590	Q6IMZ3;P48037;D3ZXN8	Annexin;Annexin A6	Anxa6;Anxa10	0.142358	0.0511288	ns	6.9414e-32	-0.207383	FDR1%
3531	F1LV44		Tenm3	0.000128632	0.176752	FDR1%	0.103587	-0.178256	ns
5327	Q1HAQ0	Lysophosphatidylcholine acyltransferase 1	Lpcat1	0.000946474	0.176547	FDR1%	0.436579	-0.0227754	ns
2014	D3ZDI7		Ppp2r5a	0.262644	-0.0522392	ns	0.827809	0.0528203	ns
6386	Q66HG5	Transmembrane 9 superfamily member 2	Tm9sf2	0.144396	0.124558	ns	1.95859e-05	-0.207041	FDR1%
2017	D3ZDK7		Pgp	0.611132	-0.0254867	ns	0.11873	0.0286444	ns
2019	D3ZDP2		Ict1	0.529214	-0.0166914	ns	NA	NA	NA
202	D3ZGM1;A0A0G2JU15;Q4KM70		Ptcd3	0.876702	-0.00726105	ns	0.185645	-0.065539	ns
2021	D3ZDR2		Chmp6	0.0436093	-0.0409864	ns	0.174332	0.0397536	ns
2024	D3ZDU2		Rptor	0.0633861	0.0729161	ns	0.079729	0.0859075	ns
2025	D3ZDX5		Plxnb1	0.197696	-0.00665697	ns	0.947448	-0.0101964	ns
2026	D3ZDX7		Mrpl48	0.809659	0.00150604	ns	0.334884	-0.0521288	ns
2027	D3ZE15;F1LZC5		LOC100911483;Ndufa13	0.661434	-0.0560908	ns	0.120008	-0.0815392	ns
47	A0A1W2Q6E9;A0A096MK30;O35763	Moesin	Msn	4.7496e-09	0.175832	FDR1%	0.00297486	-0.097957	ns
2031	F1LVA8;D3ZE30;Q63767-2;Q63767	Breast cancer anti-estrogen resistance protein 1	Bcar1	0.264253	-0.0433876	ns	0.197515	-0.023289	ns
2032	D3ZE49		Trappc12	0.207949	0.0907426	ns	0.25076	0.0573524	ns
3363	F1LP80;P20156;M0RDR2	Neurosecretory protein VGF;VGF(24-63);VGF(180-194);VGF(375-407);Neuroendocrine regulatory peptide-1;Neuroendocrine regulatory peptide-2;TLQP-11;TLQP-21;TLQP-30;TLQP-62;HFHH-10;AQEE-30;LQEQ-19	LOC100909521;Vgf	3.12076e-05	0.157796	FDR1%	2.99954e-14	-0.50848	FDR1%
2035	D3ZE72	Methionine aminopeptidase 1	Metap1	0.769886	0.0235835	ns	0.260387	0.0953861	ns
6174	Q62703	Reticulocalbin-2	Rcn2	0.385358	-0.0150205	ns	6.29186e-05	-0.2067	FDR1%
2040	D3ZEG8		RGD1309188	0.543771	-0.0272213	ns	0.0237565	-0.052281	ns
2042	D3ZEH1		Fat4	0.00233779	-0.124924	ns	0.00713064	0.11264	ns
2043	D3ZEH2		Foxred1	0.788153	-0.00255047	ns	0.443619	-0.0485995	ns
2044	D3ZEH3;A0A0U1RRQ7		Sec61a2	0.0127252	0.186224	ns	0.00991002	-0.166355	ns
3508	F1LTW9		Efr3b	0.445216	0.0399691	ns	1.6952e-07	-0.204555	FDR1%
2047	D3ZEI4		Hepacam	0.456631	-0.00207644	ns	0.234321	-0.0592414	ns
2048	D3ZEI6		Ncoa5	0.396409	0.0480692	ns	0.538373	0.0410601	ns
2050	D3ZEJ9		RGD1310429	0.771126	0.014242	ns	0.0249091	0.103065	ns
2056	D3ZER6		Tnpo2	0.00287437	0.0939348	ns	0.0202389	0.107959	ns
2057	D3ZES2		Trappc6b	0.405282	0.00243663	ns	0.492747	0.00801152	ns
1584	B2RZ09;P0C5H9	Mesencephalic astrocyte-derived neurotrophic factor	Manf	8.25067e-05	-0.0925687	FDR1%	4.15997e-12	-0.285785	FDR1%
5084	P62859;A0A0A0MY14;F1M168	40S ribosomal protein S28	Rps28;LOC100359503;LOC100360689	0.191218	-0.0367077	ns	8.93199e-08	-0.204061	FDR1%
2060	D3ZEX7;A0A0G2JZR0		Spire1	0.730646	0.0302511	ns	0.123844	-0.0779314	ns
2061	D3ZEY4	Diacylglycerol kinase	Dgkq	0.629876	-0.0179184	ns	0.59146	-0.0358376	ns
2062	D3ZF11		Lamtor5	0.559004	0.016802	ns	0.252544	0.0431849	ns
2063	D3ZF12		Spcs3	0.00388339	0.153457	ns	0.022205	-0.0764659	ns
2064	D3ZF13	Acyl carrier protein	LOC683884	0.119694	-0.0602124	ns	0.0683257	-0.0299359	ns
2067	D3ZF21		Gprin3	0.0220624	-0.116077	ns	0.481118	-0.0203673	ns
1999	D3ZD09;D3ZSB0		Cox6b1	1.78515e-05	-0.144813	FDR1%	7.97875e-10	-0.278995	FDR1%
207	Q4KLN2;A0A0G2JU49;B0BN02		Mtx1	0.824349	0.0228003	ns	0.00415647	-0.0403818	ns
2071	D3ZF45;A0A0G2K4I2		Larp4b	0.231754	0.0562182	ns	0.00296846	-0.198724	ns
6367	Q66H80	Coatomer subunit delta	Arcn1	0.00375802	0.0642302	ns	3.16039e-12	-0.204029	FDR1%
4802	P26431;P48763-2;P48763	Sodium/hydrogen exchanger 1;Sodium/hydrogen exchanger 2	Slc9a1;Slc9a2	0.453657	-0.0704313	ns	0.000220384	-0.203418	FDR1%
3443	F1LRF3;A0A0G2K5H2;A6JFQ6	Clavesin-1	Clvs1	0.0583929	0.13488	ns	0.00126743	-0.201751	FDR1%
2077	D3ZFB2		Luc7l3	0.0431673	0.122059	ns	0.18426	-0.0282253	ns
2078	D3ZFB6	Proline-rich transmembrane protein 2	Prrt2	0.00563735	-0.234943	ns	0.00696721	0.0763736	ns
208	A0A0G2JU77;D4A190		Eif3k	0.409125	0.0106024	ns	0.00472211	-0.123098	ns
2080	D3ZFF4		Lclat1	0.653102	-0.0515614	ns	0.438532	-0.0904081	ns
2082	D3ZFJ6		Lactb	0.143796	-0.0112609	ns	0.14387	-0.045219	ns
2083	D3ZFK5		Spcs1	0.678287	0.059238	ns	0.674803	-0.0657046	ns
2088	D3ZFQ1		Atxn7l3b	0.426808	0.125393	ns	0.166291	0.183697	ns
2089	D3ZFQ3		Nubpl	0.782487	0.0772859	ns	0.238445	-0.0883544	ns
209	A0A0G2JU89;F1LQI5;Q2TL32	E3 ubiquitin-protein ligase UBR4	Ubr4	0.307698	0.0342485	ns	0.056879	-0.0450286	ns
2091	D3ZFQ8		Cyc1	0.454477	-0.0201761	ns	0.306926	-0.0273696	ns
2092	D3ZFR9		Rdh13	0.0600285	-0.0789996	ns	0.136177	-0.0371642	ns
2094	D3ZFS7;B2RYW5		Lyplal1	0.0265343	-0.079593	ns	0.943125	-0.0428084	ns
2096	D4A404;D3ZFY7;D4A2Q3		Psd3	0.0551516	-0.216327	ns	0.593568	0.0639051	ns
2097	D3ZFY8;F1M227		LOC100912618	0.543997	-0.0115232	ns	0.471055	0.139474	ns
2098	D3ZG07		LOC100360750	0.8924	-0.0169198	ns	0.799427	0.0118606	ns
21	F1LQP7;A0A096MJG4;Q5EB82;A0A096MJM0;Q9QX63		Crtac1	0.452515	0.149374	ns	0.334182	-0.0154001	ns
1703	F1LT35;D3ZTH8;B5DES1;P62752;A0A0G2JU90;D3ZTX9	60S ribosomal protein L23a	RGD1564606;LOC689899;Rpl23a;RGD1565170	0.449706	-0.00748654	ns	1.1938e-06	-0.200217	FDR1%
1485	B2GV74		Klc2	0.0315383	-0.0784374	ns	5.35538e-06	-0.199128	FDR1%
2104	D3ZG78		Zzef1	0.417	-0.0298931	ns	0.747631	0.0656386	ns
2106	D3ZG85;E2E1S0		Cdkl5	NA	NA	NA	0.0548501	-0.116213	ns
2107	D3ZG88		Sssca1	0.532205	0.00549229	ns	0.18663	-0.0418367	ns
2108	D3ZG95;Q5BJV0		Micu3	0.657525	-0.0943391	ns	0.112663	-0.00482753	ns
1959	D3ZBU7		RGD1310819	1.27897e-08	-0.21016	FDR1%	2.96962e-16	-0.245432	FDR1%
2114	D3ZGL5		Prpf38a	0.155253	0.113811	ns	0.487877	0.0556426	ns
2117	D3ZGM8		Ttpal	0.0875737	0.0498194	ns	0.776115	0.0051017	ns
2118	D3ZGN2;A0A140TAJ0;Q5BJS7	Copine-9	Cpne5;Cpne9	0.32918	-0.044429	ns	0.0148163	-0.219488	ns
2119	D3ZGN7;Q5XIM1		Mical3	0.0947587	-0.0927384	ns	0.79985	0.00896315	ns
1624	B2RZD6		Ndufa4	0.00165965	-0.102757	ns	4.0679e-07	-0.198812	FDR1%
2120	D3ZGQ2		Tk2	0.845733	0.0600115	ns	0.611394	0.158548	ns
2122	R9PXS2;D3ZGS3	Inositol polyphosphate 5-phosphatase OCRL-1	Ocrl	0.84193	0.0352579	ns	0.991083	-0.0244226	ns
2124	D3ZGY2;A0A1W2Q6D9		Otud6b	0.568834	-0.0317137	ns	NA	NA	NA
2127	D3ZH14;D3ZLH7		LOC100912698;Tmcc1	0.348056	-0.00531769	ns	0.117119	-0.0602894	ns
3894	G3V667;Q924W2;Q924W3		Itga6	0.0704266	0.0467119	ns	2.79782e-05	-0.198681	FDR1%
213	A0A0G2JUC7;Q6AYH5	Dynactin subunit 2	Dctn2	0.905896	0.0155504	ns	0.874111	0.0279657	ns
3951	G3V6T1;B5DFK1	Coatomer subunit alpha	Copa	1.74956e-14	0.152354	FDR1%	3.83537e-15	-0.178155	FDR1%
2134	D3ZH75		Akt1s1	0.963285	0.0437222	ns	0.66322	0.0431688	ns
214	A0A0G2JUC9;D4ACN3		Herc2	0.0198231	0.10527	ns	NA	NA	NA
2143	D3ZHG4	Oxysterol-binding protein	Osbp2	0.343618	0.0105585	ns	0.0657908	0.0846285	ns
2144	D3ZHI8;A0A0G2K1K5		Trappc11	0.240834	0.0678778	ns	0.72155	0.0273719	ns
2146	D3ZHK4		Rb1cc1	0.112402	0.0375537	ns	0.0330642	0.0365617	ns
5396	Q3KRC3		Srpr	0.920712	0.0355746	ns	0.000114209	-0.198222	FDR1%
215	A0A0G2K763;A0A0G2JUD4;B4F7D7;A0A0G2K5C9		Ept1	0.103342	0.0714868	ns	0.10356	-0.0939316	ns
2158	D3ZHW0		Dhx29	0.104194	0.0714886	ns	0.90522	-0.0467449	ns
216	A0A0G2JUE4;Q5U4E6;A0A0G2K9I3	Golgin subfamily A member 4	Golga4	0.127675	0.143205	ns	NA	NA	NA
2160	D3ZHX3		Diras2	0.00928377	0.0686269	ns	0.273478	-0.0504896	ns
5549	Q4QQT3	CUGBP Elav-like family member 1	Celf1	0.498387	0.00411667	ns	6.03276e-12	-0.196941	FDR1%
2164	D3ZI07	Kinesin-like protein	Kif3b	0.969226	0.0654913	ns	0.0480695	0.274605	ns
1062	A0A0H2UHU0;P62853;D4AE10;F1M6F4;M0R763;D3ZCH5	40S ribosomal protein S25	Rps25;RGD1563613;LOC100912210;LOC100911337;LOC100359763	0.273415	0.0441315	ns	3.55599e-07	-0.194836	FDR1%
2167	D3ZI49;A0A0G2K8P5;Q9JHU6	Stathmin;Stathmin-3	Stmn3	0.117471	-0.110156	ns	0.0168617	0.125748	ns
2168	D3ZI68		Prpf31	0.0859487	0.0956687	ns	0.264703	-0.0568916	ns
2169	D3ZI74		Nat14	0.439308	0.00191971	ns	0.0460056	-0.0582441	ns
6804	Q7TP42		Sec62	0.0582722	0.075988	ns	9.73665e-06	-0.194724	FDR1%
4149	G3V912;Q52KK2		Tmx4	1.50053e-05	0.151282	FDR1%	2.77841e-10	-0.350933	FDR1%
2173	D3ZIF0		Zfp512	0.851679	0.0245779	ns	0.775061	-0.00127896	ns
152	A0A0G2JT30;Q5U2R0	Methionine adenosyltransferase 2 subunit beta	Mat2b	3.53891e-05	0.174699	FDR1%	0.860812	-0.0998998	ns
2176	D3ZIJ5		Dpm3	0.54586	0.0551087	ns	0.571628	-0.0547183	ns
2179	D3ZIM7		Fam177a1	0.533455	0.0066468	ns	0.272559	-0.035632	ns
2180	D3ZIN7		Mrps23	0.865026	0.0467059	ns	0.0119155	-0.0629522	ns
2181	D3ZIP8		Endod1	0.059581	0.230525	ns	0.214055	-0.0934655	ns
2183	D3ZIT4		Anapc7	0.782956	-0.00507304	ns	0.766914	0.0689524	ns
4886	P38983	40S ribosomal protein SA	Rpsa	0.0373612	0.0323896	ns	3.38681e-17	-0.194694	FDR1%
219	A0A0G2JUG7			0.334691	-0.0407377	ns	0.0115199	-0.0849746	ns
2191	D3ZJ01		RGD1307235	0.144679	-0.0140059	ns	0.0557637	0.0528751	ns
2193	D3ZJ32		Esyt2	0.0197644	0.0190413	ns	0.632364	-0.000739646	ns
2195	D3ZJ86	Sodium/hydrogen exchanger	Slc9a6	0.967216	0.00486066	ns	0.710455	0.00417774	ns
2197	D3ZJ92		Prpf40a	0.0611119	0.113479	ns	0.468194	-0.0184293	ns
2200	D3ZJA9		Slc27a3	0.743894	0.00193543	ns	0.24266	0.0591748	ns
2201	D3ZJB7		Slc30a10	NA	NA	NA	0.758761	-0.0229565	ns
2203	Q642E2;D3ZJD3;D3ZEI0;P17702;A0A0G2K8E0	60S ribosomal protein L28	LOC100362069;RGD1565183;LOC690096;Rpl28	0.0487537	0.11625	ns	0.361846	-0.0720772	ns
2205	D3ZJF9		Gla	0.0756152	0.180102	ns	0.309848	0.0599597	ns
2206	D3ZJG3		P4htm	NA	NA	NA	0.0728505	-0.0925156	ns
2207	D3ZJG4		Pacs2	0.726504	-0.00469339	ns	0.948856	-0.0311577	ns
6559	Q6AYT7	Monoacylglycerol lipase ABHD12	Abhd12	0.00427916	0.112932	ns	0.00126275	-0.194195	FDR1%
221	A0A0G2JUH8;D3ZCH3		Snx13	0.859519	-0.0457793	ns	NA	NA	NA
2210	D3ZJK8		Atp8a1	0.29004	0.0179569	ns	0.0126507	0.1151	ns
2214	D3ZJR6		Smcr8	0.526334	0.0275778	ns	0.0606731	-0.0334573	ns
2219	D3ZJX5		Timm50	0.857099	-0.0327734	ns	0.329094	-0.0585556	ns
2220	D3ZJY1		Mrpl28	0.306548	-0.00161409	ns	0.202193	-0.0510151	ns
2224	D3ZK56		Rap2c	0.0826462	0.00397048	ns	0.398484	0.0178595	ns
2225	D3ZK73		Cul4b	0.116335	-0.00844053	ns	NA	NA	NA
2231	D3ZKE1		Uvrag	0.564679	0.00517766	ns	0.029698	0.158356	ns
2233	D3ZKG1		Mut	0.526825	-0.0338283	ns	0.022449	-0.119996	ns
2237	D3ZKH6		Rabgap1l	0.115439	0.0235073	ns	0.409727	-0.0567667	ns
224	A0A0G2JUJ9;D4A2Z6		Sec63	0.0819061	0.0975141	ns	0.444103	-0.0537431	ns
6428	Q68FW4	Syntaxin-18	Stx18	0.671344	-0.00448498	ns	0.00031233	-0.193663	FDR1%
2242	D3ZKQ4		Rabl6	0.0104399	-0.102864	ns	0.71787	0.0747447	ns
2245	D3ZKT0	Phosphatidate cytidylyltransferase, mitochondrial	Tamm41	0.708504	-0.0454555	ns	0.449698	-0.0112561	ns
2246	D3ZKT8		Hddc2	0.186353	-0.00705243	ns	0.0825609	0.112434	ns
2249	D3ZKX8		Fam169a	0.00671644	0.135275	ns	0.387249	0.0802865	ns
2250	D3ZL11		Rbsn	0.831759	0.0403891	ns	0.296681	0.0540492	ns
2253	D3ZL45		RGD1560784	0.00917884	0.109423	ns	NA	NA	NA
2254	D3ZL50		Ttc37	0.0941769	0.0526608	ns	0.0652089	0.0774915	ns
2256	D3ZL85		Hccs	0.0413773	-0.0588764	ns	0.00401083	-0.132807	ns
2257	D3ZL86;A0A0G2JV87		Heatr1	0.257806	0.111292	ns	0.531017	0.0870193	ns
2260	D3ZLC1		Lmnb2	0.0195024	-0.0552927	ns	0.981611	0.00782816	ns
1410	B1WBY7		Erlin1	0.854851	0.0547337	ns	3.53564e-05	-0.192504	FDR1%
2267	D3ZLN7		Commd2	0.745764	-0.00752316	ns	0.52742	0.0727995	ns
227	A0A0G2JUM2;Q5XI83	UPF0505 protein C16orf62 homolog		0.571932	-0.00204918	ns	0.134825	0.0595538	ns
2272	D3ZLT1		Ndufb7	0.90066	-0.0426482	ns	0.155436	-0.0727008	ns
2278	D3ZLZ7;A0A0A0MXZ8	Inosine-5-monophosphate dehydrogenase 1;Inosine-5-monophosphate dehydrogenase	Impdh1	0.169611	0.0726129	ns	0.0906252	0.0961901	ns
228	D3ZTJ0;A0A0G2JUM3	Protein XRP2	Rp2	0.772417	0.0611391	ns	0.924386	0.0515963	ns
2280	D3ZM09		Sars2	0.346718	-0.0195684	ns	0.0115088	-0.0379819	ns
2281	D3ZM21		Comtd1	0.480905	0.00898996	ns	0.0740784	0.0859916	ns
2290	D3ZML2-2;D3ZML2;M9MMM8	Serine/threonine-protein kinase BRSK2	Brsk2	0.878842	0.0432116	ns	0.0167373	0.144127	ns
2296	D3ZMP6		Nop10	0.368914	0.0727012	ns	0.969536	0.0856814	ns
2299	D3ZMR9		Mrpl21	0.289626	0.0503144	ns	0.11739	-0.0531839	ns
23	A0A096MJI4		Gigyf2	0.0885413	-0.0564979	ns	0.0137642	-0.129445	ns
2300	D3ZMS0		LOC100911713	0.27489	-0.0732959	ns	0.190102	0.112594	ns
2301	D3ZMS1		Sf3b2	0.749851	-0.0167504	ns	0.436322	-0.0642656	ns
584	A0A0G2K1W1			0.06499	-0.118636	ns	0.00015464	-0.191742	FDR1%
4794	P24329	Thiosulfate sulfurtransferase	Tst	0.00146867	-0.0489082	ns	2.97535e-05	-0.191239	FDR1%
2310	D3ZN39	Ubiquitin carboxyl-terminal hydrolase	Usp8	0.17231	0.0770496	ns	0.431907	-0.0200551	ns
2311	D3ZN43;A0A0H2UI06	NADH dehydrogenase (ubiquinone) complex I, assembly factor 6	Ndufaf6	0.48689	-0.0688708	ns	0.0603212	-0.159505	ns
2313	D3ZN76		Sec16a	0.182379	0.0915912	ns	0.854455	-0.0223422	ns
2314	D3ZN95		Hcfc1	0.929651	-0.0210389	ns	0.099134	0.029039	ns
2319	D3ZNI3		Pdcd11	NA	NA	NA	0.967304	-0.0443241	ns
4671	P12075	Cytochrome c oxidase subunit 5B, mitochondrial	Cox5b	0.00399006	-0.120568	ns	1.95024e-06	-0.190546	FDR1%
2320	D3ZNK1		Mtx3	0.433165	-0.0251902	ns	0.497292	0.0285825	ns
80	A0A0A0MXZ0;Q80W96	Iron-sulfur cluster assembly 1 homolog, mitochondrial	Isca1	0.713628	-0.036513	ns	2.70835e-05	-0.190392	FDR1%
2322	D3ZNS8		Aaas	0.154333	0.0670678	ns	0.616527	0.0131756	ns
2324	M0RC60;D3ZNV6		LOC100910164;Elmod2	0.301282	0.123061	ns	0.142428	-0.064591	ns
2327	D3ZNY3		Mmaa	0.734787	0.013708	ns	0.946816	-0.0440963	ns
2328	M0RBQ5;D4A817;D3ZNZ9	Histone H2B	Hist3h2bb;LOC100912338;Hist3h2ba	0.964044	0.0207792	ns	0.573159	-0.0138467	ns
233	A0A0G2JUS7;B0BN86	Transmembrane protein 11, mitochondrial	Tmem11	0.263749	0.0134289	ns	0.544538	-0.0428004	ns
2903	D4A563		Peak1	0.759768	0.0551562	ns	3.25469e-05	-0.19026	FDR1%
5736	Q5EB77	Ras-related protein Rab-18	Rab18	0.033473	0.0434167	ns	1.72621e-21	-0.189021	FDR1%
2336	D3ZPE5;B4F763		Vps53	0.234655	0.000378501	ns	0.00498104	0.087467	ns
2338	D3ZPF2		Mcat	0.889538	-0.0483584	ns	0.747752	0.00463221	ns
234	A0A0G2JUT1;Q6AYP5;Q6AYP5-2		Cadm1	0.0137174	-0.0891095	ns	0.0924793	0.0983751	ns
2344	D3ZPL1		Cpsf6	0.945448	-0.00358186	ns	0.805113	0.00947882	ns
1356	B0K031;P05426;B0K023;F1LUE9;Q7TP62	60S ribosomal protein L7	Rpl7;LOC367195	1.03644e-10	0.119606	FDR1%	0.00146852	-0.0889413	FDR1%
2348	D3ZPN3		Mlf2	0.411473	0.0986052	ns	0.286586	0.0284472	ns
2350	Q6PDW2;D3ZPN7;D3ZZH9;M0R5R7;D4A870;D3ZPH0;D3ZMI8;D3Z9G3;F1LWH4;D3ZRA9;D3ZLH3;D3ZEK2;D4A7B4;D4A219;D3ZHP4;M0RAP0;M0RCS9;D3ZCN5;D4A4G7;D3ZIM9;D4A9T8		LOC100360604;LOC681195;LOC686080;RGD1565370;RGD1562839;LOC100361103;RGD1560414;RGD1562601;RGD1562923;LOC100360611;RGD1565159;RGD1561875;RGD1565555;RGD1566270;RGD1564552	0.155709	0.106346	ns	0.0604314	-0.143366	ns
2351	D3ZPP2		Arl8a	0.177057	0.0524557	ns	0.0933488	0.0831496	ns
2353	D3ZPR0		Cse1l	0.293892	0.0390789	ns	0.0318051	0.0869505	ns
2354	D3ZPT0;D3ZUH5		Prr36	0.00273793	-0.128328	ns	0.747535	0.022919	ns
2355	D3ZPV8		Ggct	NA	NA	NA	0.889903	0.0211649	ns
2357	D3ZPX4	Plexin-A3	Plxna3	0.743872	-0.0313718	ns	0.534206	0.0033121	ns
2358	D3ZPY0;A0A0G2K2U2		Wtap	0.910442	-0.00618483	ns	0.206461	0.0530434	ns
5129	P63245;A0A0G2JZE6;A0A0G2JY24	Guanine nucleotide-binding protein subunit beta-2-like 1;Guanine nucleotide-binding protein subunit beta-2-like 1, N-terminally processed	Gnb2l1	0.00109878	0.0615439	ns	1.28391e-16	-0.188797	FDR1%
236	A0A0G2JUT7			0.792526	-0.087613	ns	0.467017	-0.207892	ns
2363	D3ZQ57		Plxnb2	0.2948	0.0236139	ns	0.0730024	-0.0720323	ns
4232	M0R402		Tmx3	0.110764	0.0604341	ns	4.099e-10	-0.188203	FDR1%
2368	D3ZQB6		Cecr5	0.831101	-0.0288376	ns	0.708565	0.0156135	ns
70	S5RZM8;Q8SEZ5;A0A097PE04;P00406	Cytochrome c oxidase subunit 2	COX2;Mt-co2;Mtco2	0.024097	-0.0703199	ns	0.000976516	-0.188103	FDR1%
1008	A0A0G2QC31;Q56A30;P35234	Protein-tyrosine-phosphatase;Tyrosine-protein phosphatase non-receptor type 5	Ptpn5	0.469169	-0.0762861	ns	0.000871377	-0.187836	FDR1%
5033	P61314;D3ZF52	60S ribosomal protein L15;Ribosomal protein L15	Rpl15;RGD1565767	0.000778655	0.167616	FDR1%	0.554465	-0.0729365	ns
1290	B0BN97;Q498E0	Thioredoxin domain-containing protein 12	Txndc12	0.770752	-0.0348681	ns	1.16025e-06	-0.187607	FDR1%
2379	D3ZQK4		Txndc16	0.452795	0.0251026	ns	0.111079	-0.315203	ns
238	A0A0G2JUU7;D3ZMR7		Tubgcp3	0.414977	0.0198048	ns	0.17731	0.0563481	ns
2380	D3ZQL1		Emc7	0.0143753	0.0667383	ns	0.469568	-0.0355867	ns
2381	D3ZQM0		Sf3a1	0.371741	-0.0407626	ns	0.162587	-0.0888999	ns
2382	D3ZQN3		Pnmal2	0.0712502	-0.103028	ns	0.147602	-0.0438297	ns
2386	D3ZQR6		Eml6	0.389631	-0.0294876	ns	NA	NA	NA
2389	D3ZQY4		Fryl	0.0194374	0.0929992	ns	0.0643277	-0.0678996	ns
3437	F1LR98;Q8R5H2;Q9JIW3		Cdh10	0.000221762	-0.203936	FDR1%	1.82612e-06	-0.230454	FDR1%
2394	D3ZR63		Gfod1	0.865508	-0.00688251	ns	0.502412	-0.0466693	ns
24	A0A096MJJ6;B1H213;A0FKI7-2;A0FKI7;A0FKI7-3;M0R9S4;A0A0G2K3Z5	Acyl-CoA-binding domain-containing protein 5	Acbd5;LOC100910957	0.18185	-0.0328019	ns	0.482028	-0.0626665	ns
240	F1MAA1;A0A0G2JUX4;B2GVC1	Ubiquitin carboxyl-terminal hydrolase	Usp47	0.109275	0.0660348	ns	0.9858	0.00171123	ns
2400	D3ZRB3		LOC687609	0.390183	-0.0130347	ns	0.174836	0.124169	ns
2401	D3ZRC4;A0A0G2K621;A0A1W2Q6K3;A0A1W2Q6C9;A0A1W2Q6G9		Pnpla8	0.61184	-0.0075551	ns	0.307764	-0.0472283	ns
2402	D3ZRD3		Pde6d	0.987609	0.0561781	ns	0.469281	-0.0735833	ns
2557	D3ZVU6		Avl9	0.0273826	-0.101286	ns	2.33748e-05	-0.187559	FDR1%
2406	D3ZRG7;D3ZRC3		Rbm26	0.674853	0.00979795	ns	0.797989	-0.0664555	ns
2407	D3ZRH1		Oxa1l	0.337253	-0.0331553	ns	0.501434	-0.0391226	ns
811	A0A0G2K757;P25235	Dolichyl-diphosphooligosaccharide--protein glycosyltransferase subunit 2	Rpn2	2.75467e-09	0.155113	FDR1%	0.00773359	-0.0607833	ns
2410	D3ZRJ0		Adck1	0.609929	-0.0461787	ns	0.0580405	-0.0613651	ns
2412	D3ZRM5		Rab23	0.467298	-0.00570884	ns	0.582045	-0.0239004	ns
4125	G3V8R2;P55067;A0A0G2K4R4;O70474	Neurocan core protein;150 kDa adult core glycoprotein	Ncan	4.31488e-09	0.117728	FDR1%	3.25383e-07	-0.117812	FDR1%
2416	D3ZRN5		Trove2	0.0823833	0.0911674	ns	0.0247584	0.102993	ns
2417	D3ZRX7;F1M6B6		Pcdh10	0.139454	0.0965361	ns	0.0693555	-0.0954989	ns
3103	G3V9H1;D4AB55;O08774;A0A0G2K326;O08774-2	Regulator of G-protein signaling 12	Rgs12	1.64215e-06	-0.226186	FDR1%	5.81079e-08	-0.226736	FDR1%
6701	Q6PDW1;D3ZHB3;P63324;D3ZV36;D3ZG05	40S ribosomal protein S12	LOC100359593;LOC100360573;Rps12;RGD1561102;LOC100912049	0.499758	0.0213261	ns	1.25429e-09	-0.186478	FDR1%
2425	D3ZSA9		Nomo1	0.00118011	0.0536093	ns	0.978162	-0.00169132	ns
243	D3ZKK5;A0A0G2JUZ0		Mtmr1	0.313268	-0.0765958	ns	0.336067	0.131317	ns
6640	Q6P0K8;P70565	Junction plakoglobin	Jup	NA	NA	NA	0.00148219	-0.185617	FDR1%
2432	D3ZSP1;D4A8M5;Q6QI63;F7ETL6		LOC100361838;Snrpep2;Zfp341	0.37769	-0.0177317	ns	0.0173911	-0.0978023	ns
244	A0A0G2JUZ5			0.119265	0.178168	ns	0.0125408	-0.160759	ns
2441	D3ZSY8		Tbc1d10b	0.300101	-0.0502052	ns	0.337875	0.0310132	ns
2443	D3ZSZ4		Pgbd5	0.267842	-0.0581365	ns	0.123956	0.0390497	ns
2449	D3ZT36		Adam23	0.957002	-0.00952795	ns	0.00426265	-0.0914703	ns
245	A0A0G2JV04;D3ZHG8		Gga3	0.0418075	-0.150359	ns	0.525175	0.0197321	ns
42	A0A096MJZ2;M0RCS2		Tbl2	0.0722421	0.0758402	ns	8.62739e-09	-0.184903	FDR1%
665	A0A0G2K3N1;F1M8X9		Gbf1	5.94956e-05	0.154411	FDR1%	0.946202	-0.0127532	ns
2457	D3ZT90		Gcdh	0.361488	-0.00652433	ns	0.00419432	-0.0699587	ns
2458	D3ZT98		Bola3	0.429616	-0.0224226	ns	0.0278679	-0.158667	ns
2461	D3ZTF0		RGD1560470	0.568361	-0.0247138	ns	0.0276722	-0.16425	ns
2466	D3ZTK0		Ttc9b	0.0648074	-0.0317203	ns	0.00299117	0.279665	ns
2468	D3ZTN1		Tesc	0.705082	0.0209562	ns	0.0189102	0.21564	ns
2469	D3ZTN2		Cmc1	0.252938	-0.0233491	ns	0.115603	-0.028909	ns
2471	D3ZTP0	10-formyltetrahydrofolate dehydrogenase	Aldh1l2	0.550055	0.0587343	ns	0.2695	-0.0736645	ns
2474	D3ZTR1		Mrps17	0.452048	0.00256104	ns	0.929337	-0.000724721	ns
5323	Q14TE9;Q63177	DNA topoisomerase 2	Top2b	0.000194405	0.11694	FDR1%	1.47698e-05	-0.0896123	FDR1%
2478	D3ZTV3		Flrt2	0.665205	0.0150381	ns	NA	NA	NA
2479	D3ZTV7;A0A0G2JT90		Ash2l	0.54642	-0.0351513	ns	0.32089	-0.0480656	ns
2480	D3ZTW7		Atpaf2	0.323084	-0.0406851	ns	0.0235484	-0.100617	ns
2481	D3ZTW8		Mrpl27	0.814419	0.0505442	ns	0.183726	-0.0880905	ns
2482	D3ZTW9		Exog	0.0788146	-0.0442903	ns	0.937037	-0.00183851	ns
4901	Q6P9X2;P42667	Signal peptidase complex catalytic subunit SEC11;Signal peptidase complex catalytic subunit SEC11A	Sec11a	0.000129416	0.154359	FDR1%	0.467776	0.01914	ns
2484	D3ZTX1		Trim67	0.914199	0.0138307	ns	0.890841	-0.0148677	ns
2009	D3ZD97		Dhx15	7.6515e-08	0.154269	FDR1%	0.983445	-0.030843	ns
2496	D3ZU84		Stxbp5l	0.401208	0.0172958	ns	0.133092	0.0306326	ns
2498	D3ZUB0		Rcn1	0.331864	-0.0561103	ns	0.28096	-0.0247205	ns
25	A0A096MJL2;A0A096MJC9		LOC100911918	0.709604	0.0312983	ns	0.0712041	0.209166	ns
3099	D4AB03		Fam120a	0.745032	0.0166019	ns	1.45799e-12	-0.18486	FDR1%
2502	D3ZUD8		Tm9sf3	0.00410139	0.126808	ns	0.294954	-0.0978131	ns
6730	Q6TUG0	DnaJ homolog subfamily B member 11	Dnajb11	0.436414	0.0493485	ns	0.000133641	-0.184675	FDR1%
2506	D3ZUJ7		Ankrd13d	0.0673121	-0.0888645	ns	0.0917007	0.112567	ns
1283	B0BN74;F1LQH9		Bag2	0.18502	-0.0479614	ns	4.41023e-05	-0.184293	FDR1%
2512	D3ZUM2		Sarm1	0.0612585	0.0480638	ns	0.082183	0.0556936	ns
2513	D3ZUM4	Beta-galactosidase	Glb1	0.350198	0.0174409	ns	0.86469	0.0600628	ns
2515	D3ZUP5		Brk1	0.0586231	-0.0777467	ns	0.658823	0.0408638	ns
2516	D3ZUP8		Lmbrd2	0.500189	0.00942555	ns	0.109045	0.0838673	ns
2520	D3ZUT9		Ints3	0.294586	-0.0683254	ns	0.472902	-0.0222331	ns
2521	D3ZUV2		Mib1	0.761633	0.0198872	ns	0.444484	0.0481756	ns
2522	D3ZUV3		Eif2a	0.992535	-0.0149069	ns	0.124716	-0.0797722	ns
2523	D3ZUV9		Cnot3	0.44581	-0.0675324	ns	0.285266	-0.0480724	ns
5132	P63281;A0A0G2KB55	SUMO-conjugating enzyme UBC9	Ube2i	0.000181351	0.15366	FDR1%	0.576901	0.0847513	ns
4547	P04182	Ornithine aminotransferase, mitochondrial	Oat	0.231746	-0.0292842	ns	2.02466e-20	-0.184087	FDR1%
2526	D3ZUX7		Acsf3	0.485595	0.0248275	ns	0.0623755	-0.0500834	ns
2527	D3ZUY0;A0A1B0GWW7		Rdh14	0.116024	-0.0547921	ns	0.382229	0.0471121	ns
2528	D3ZUY8		Ap2a1	0.0864034	-0.0273632	ns	0.0533956	-0.00470388	ns
2529	D3ZUZ4		Fam20b	0.566551	0.0438446	ns	0.0117535	-0.183582	ns
253	A0A0G2JV54;Q9Z118	Polypyrimidine tract-binding protein 3	Ptbp3	0.703048	-0.000308964	ns	NA	NA	NA
5461	Q498R3	DnaJ homolog subfamily C member 10	Dnajc10	0.807508	-0.00472438	ns	3.96585e-06	-0.183763	FDR1%
2533	D3ZV52		Itsn1	0.591907	-0.0561956	ns	0.497175	0.095445	ns
2535	D3ZV63;D3ZV64		RGD1307830	0.568067	-0.0163537	ns	0.696862	-0.0388944	ns
2536	D3ZV75		Mfsd1	0.285818	0.101759	ns	0.0711104	0.164145	ns
2538	D3ZVA5		Fbll1	0.203637	0.0339308	ns	0.364055	0.0536786	ns
2541	Q5BJL8;D3ZVF4	Trafficking protein particle complex subunit 2	Trappc2	0.85918	0.0240809	ns	0.813601	0.0232637	ns
2544	D3ZVH6		Vps41	0.606849	0.0290595	ns	0.0864002	0.116115	ns
2546	D3ZVI9		LOC100911365	0.965502	-0.0405984	ns	0.267175	-0.0297346	ns
2547	D3ZVJ9;A0A0G2K2B7;Q5BJW6		Wdr20	0.500968	-0.07253	ns	0.244321	-0.0336796	ns
2548	D3ZVN7		Ppox	0.156015	0.0250874	ns	0.670872	0.00884955	ns
255	A0A0G2JV57;A0A0U1RRY3;A0A0U1RRZ2;Q64270;A0A1L1WKF1	Translation initiation factor eIF-2B subunit alpha	Eif2b1	0.332979	0.165802	ns	0.452391	-0.00388539	ns
2550	D3ZVQ0	Ubiquitin carboxyl-terminal hydrolase	Usp5	0.133438	0.0403889	ns	0.0504821	0.0631788	ns
2551	D3ZVQ3;B0BN11		Porcn	0.436025	-0.0294275	ns	0.0851369	-0.0470757	ns
7118	Q9R1K2;Q9R1K2-2;A0A096P6L6;Q9R1K2-4;Q9R1K2-3	Teneurin-2;Ten-2, soluble form;Ten-2 intracellular domain	Tenm2	0.251172	-0.0158479	ns	5.52494e-15	-0.183722	FDR1%
2554	D3ZVS2		L2hgdh	0.0731748	-0.0341594	ns	0.0168119	-0.0621758	ns
6476	Q6AY21		G3bp2	0.0587052	-0.0396775	ns	5.66989e-08	-0.183632	FDR1%
5665	Q569C9;Q9ERE4	Golgi phosphoprotein 3	Golph3	NA	NA	NA	3.08186e-06	-0.181965	FDR1%
2562	D3ZW09;A0A0G2K902		Sorcs2	0.0170348	-0.0474018	ns	0.0107481	-0.0272742	ns
2563	D3ZW15		Sec24b	0.394285	0.0203066	ns	0.026297	0.0820254	ns
2564	D3ZW44			NA	NA	NA	0.0116465	0.237651	ns
4860	P35332;Q9QWR2	Hippocalcin-like protein 4	Hpcal4	0.0147987	-0.153908	ns	4.7364e-10	-0.180766	FDR1%
2566	D3ZW58		Casc4	0.948004	0.0391139	ns	0.00737648	-0.16706	ns
5276	Q05683	Glutamate decarboxylase 2	Gad2	0.499676	0.0230769	ns	2.67581e-18	-0.179731	FDR1%
2569	D3ZWA8		Appl1	0.427812	-0.00881889	ns	0.437107	0.0168033	ns
257	A0A0G2JV84			0.30248	0.0323205	ns	0.00486609	-0.0875788	ns
2573	D3ZWC6		Sntb1	0.0485426	-0.126284	ns	0.254096	-0.0274742	ns
2578	D3ZWF5	Transcription and mRNA export factor ENY2	Eny2	0.0380942	0.0849472	ns	0.0409291	0.0599315	ns
6929	Q91ZY8	E3 ubiquitin-protein ligase TRIM9	Trim9	0.464137	0.0493953	ns	1.04903e-05	-0.179702	FDR1%
6934	Q920L7;D4A612	Elongation of very long chain fatty acids protein 5;Elongation of very long chain fatty acids protein 2	Elovl5;Elovl2	0.577644	0.0553002	ns	0.000522027	-0.179699	FDR1%
2588	D3ZWP6		Plxna2	0.379253	0.0589927	ns	0.15723	-0.0474632	ns
259	A0A0G2JVB6;G3V7P1;A0A0G2K4U8	Syntaxin-12	Stx12	0.715153	-0.000491241	ns	0.413087	-0.00680188	ns
2590	D3ZWQ0;D3ZQA9		Prrt3	0.325418	-0.0404867	ns	0.425495	0.0399969	ns
2593	D3ZWS0		Scrib	NA	NA	NA	0.289124	0.0308247	ns
6879	Q8K3P6	Calcium-binding mitochondrial carrier protein SCaMC-2	Slc25a25	0.0627534	-0.0224545	ns	9.52539e-08	-0.179328	FDR1%
2600	D3ZWV8		Tiam1	0.0818185	-0.0979571	ns	0.00942953	-0.183929	ns
2601	D3ZWW5		Slc30a9	0.314719	-0.0303423	ns	0.804273	0.00145322	ns
2602	D3ZWX4		Nckipsd	0.448592	-0.0352426	ns	0.705835	-0.03705	ns
2609	D3ZX38		Pfdn1	0.329057	0.0505109	ns	0.0340493	0.0604217	ns
2610	D3ZX42		Rabgap1	0.89783	-0.00211331	ns	0.818168	0.0112788	ns
2613	D3ZX69;P0C2C4	39S ribosomal protein L10, mitochondrial	Mrpl10	0.927205	0.0214493	ns	0.00878909	-0.046571	ns
2615	D3ZXA6		Pdpr	0.485037	-0.0171486	ns	0.887255	0.0259163	ns
2619	D3ZXF8		Mrpl43	0.102614	0.064735	ns	0.865107	-0.0574252	ns
2620	D3ZXF9		Mrpl12	0.0711575	-0.0416285	ns	0.0721787	-0.0417759	ns
2621	D3ZXH7		Alyref	0.0401702	-0.113562	ns	0.238398	-0.0552867	ns
2622	D3ZXI0;B2RYR3	Pyrroline-5-carboxylate reductase	Pycr1	0.00116262	0.155101	ns	0.0289519	-0.116146	ns
2625	D3ZXK4		Abhd11	0.664269	-0.00489235	ns	0.210905	0.00502754	ns
2627	D3ZXL1;Q5XI15		Arih1	0.743699	0.0490393	ns	0.208847	0.0434036	ns
263	A0A0G2JVE0;D3ZXC6;Q5U4E5;F1LMH8		Fbxw11;Btrc	0.770733	-0.041939	ns	0.438143	0.0411419	ns
5632	Q52KJ9		Tmx1	0.011526	0.158529	ns	0.000661309	-0.177865	FDR1%
3966	G3V6Z3;Q8VH46;A0A0G2JVI5	Actin filament-associated protein 1	Afap1	0.391095	0.0875049	ns	0.000782762	-0.176403	FDR1%
719	A0A0G2K528;B5DF99;D3Z9R7		Stx16	0.872712	-0.0123999	ns	0.00143948	-0.1703	FDR1%
2635	D3ZY03;A0A0G2JXR9;O88382-3;O88382-2;O88382	Membrane-associated guanylate kinase, WW and PDZ domain-containing protein 2	Magi2	0.0891534	-0.0504583	ns	0.00335656	-0.106553	ns
2637	D3ZY44		Mrps2	0.827951	0.00784483	ns	0.0179758	-0.102747	ns
2641	D3ZY50		Atpaf1	0.679551	-0.0547177	ns	0.513202	-0.043426	ns
130	A0A0G2JSQ1;Q63754	Beta-synuclein	Sncb	0.00778913	-0.0955322	ns	1.32924e-05	-0.17029	FDR1%
2647	D3ZYD7		Ccdc88a	0.0759711	-0.0715792	ns	0.373438	0.00480717	ns
2648	D3ZYH3		LOC100912928	0.673101	-0.0238391	ns	0.94362	0.111181	ns
4613	P09606	Glutamine synthetase	Glul	0.264557	-0.0392359	ns	1.83858e-07	-0.169875	FDR1%
2654	D3ZYL4		Mrpl50	0.270614	-0.0177752	ns	0.00308416	-0.0860872	ns
2655	D3ZYM7		Lyrm4	0.906333	-0.0100163	ns	0.020216	-0.0421662	ns
2658	D3ZYR1	F-BAR domain only protein 2	Fcho2	0.491963	-0.0707559	ns	0.401249	-0.00717829	ns
1728	B5DF50;A0A0G2JU25;D3ZFD2	Polypeptide N-acetylgalactosaminyltransferase	Galnt2	3.25306e-05	0.15162	FDR1%	0.195887	0.059682	ns
266	A0A0G2JVF1;Q3B7K9	RUN domain-containing protein 3B	Rundc3b	0.075	0.03795	ns	0.353881	0.0495189	ns
2660	D3ZYS1		Purg	0.612201	-0.0128898	ns	0.117871	-0.129004	ns
3180	D4ADD3		Hecw2	0.0750297	-0.0890482	ns	3.55962e-05	-0.169813	FDR1%
2662	D3ZYT2		Mrps5	0.620513	-0.00113296	ns	0.0223117	-0.0742686	ns
5190	P84100;F1M5A9	60S ribosomal protein L19	Rpl19;RGD1562420	0.375858	0.0317493	ns	1.63388e-06	-0.169793	FDR1%
2667	D3ZYY0		Sdr39u1	0.396316	-0.0739657	ns	0.322083	0.0101118	ns
267	A0A0G2JVG4;Q9WVK3;A0A0G2JUF1;A0A0G2K6H4	Peroxisomal trans-2-enoyl-CoA reductase	Pecr	0.847407	-0.057954	ns	0.843582	-0.00777444	ns
2670	D3ZZ21		Ndufb6	0.212341	0.0167354	ns	0.371317	-0.0691455	ns
4402	O08816;F1LSG0	Neural Wiskott-Aldrich syndrome protein	Wasl	0.267062	-0.0545618	ns	1.62027e-05	-0.169768	FDR1%
159	A0A0G2JT78;F1LVC3		Rab6b	0.35319	-0.0229914	ns	4.42175e-06	-0.169572	FDR1%
2679	D3ZZ99		Add1	0.011793	-0.0980893	ns	0.273866	0.0699476	ns
268	A0A0G2JVH4;A0A140TAG5;Q3KR86	MICOS complex subunit Mic60	Immt	0.00462889	-0.0458219	ns	0.00597115	-0.0426531	ns
2680	D3ZZA8		Sec24a	0.463701	-0.00302303	ns	0.854721	0.00425664	ns
1043	A0A0H2UHN2;O35760	Isopentenyl-diphosphate Delta-isomerase 1	Idi1	0.519395	0.0319287	ns	4.97363e-08	-0.169095	FDR1%
2682	D3ZZB2		Pex1	NA	NA	NA	0.310328	0.0402418	ns
2683	D3ZZC1		Txndc5	0.0446582	0.0514827	ns	0.0214902	-0.032005	ns
3462	F1LRV6;Q9Z244	GMP reductase;GMP reductase 1	Gmpr	0.808624	0.058584	ns	5.27549e-05	-0.168854	FDR1%
2687	D3ZZF8		Paip1	NA	NA	NA	0.221576	0.0830926	ns
2688	D3ZZG3		LOC691921	NA	NA	NA	0.537771	-0.130095	ns
4105	G3V8J5;Q9ESQ7	PH and SEC7 domain-containing protein 1	Psd	4.34716e-07	-0.248481	FDR1%	4.32187e-06	0.205288	FDR1%
1202	F1LQZ0;A1L1L9;B1WBL4		Tmem65	0.884196	0.033281	ns	0.00209532	-0.168625	FDR1%
2695	D3ZZN3	Acetyl-coenzyme A synthetase	Acss1	0.771016	-0.0622066	ns	0.342843	0.00878169	ns
2696	D3ZZP2		Rab39a	0.216855	0.0224681	ns	0.270723	0.00881196	ns
2698	D3ZZR5;D3ZLF6		Snrpa1	0.742394	0.0295735	ns	0.641387	-0.0523812	ns
6484	Q6AY48		Pcbp3	0.00784434	0.10542	ns	0.0001107	-0.168533	FDR1%
27	A0A096MJM1;Q32PX6;A0A096MK75		Rhog	0.335734	0.0882325	ns	0.308198	-0.006247	ns
2703	D3ZZV1;Q6EIX2	Mitochondrial import inner membrane translocase subunit TIM16	Pam16;Magmas-ps1	0.959035	0.0137398	ns	0.0640963	-0.121615	ns
2705	D3ZZW1		Dock1	0.00291745	0.132935	ns	0.212624	0.123765	ns
4005	G3V7G9	Eukaryotic translation initiation factor 3 subunit L	Eif3l	0.65004	-0.0192113	ns	0.000303636	-0.167874	FDR1%
2708	D3ZZZ5		Ppcdc	0.18695	-0.121124	ns	0.689939	0.0255974	ns
2709	D3ZZZ9		Ctnnd1	0.324807	-0.0126234	ns	0.206504	-0.030707	ns
1523	B2RYI2	Signal recognition particle subunit SRP68	Srp68	0.000508913	0.150839	FDR1%	0.0185256	-0.102351	ns
2712	D4A022		Gapvd1	0.626629	0.0393148	ns	0.0111298	0.109325	ns
6693	Q6PCT9		Psmd6	1.10138e-06	0.149101	FDR1%	0.235849	0.031411	ns
2716	D4A040;D4A0K2		Mrps11;LOC690271	0.0789209	0.0360686	ns	0.032366	-0.0650803	ns
2717	D4A053;Q7TP36	Protein Shroom2	Shroom2	0.0118918	-0.146169	ns	0.67744	-0.0124443	ns
5136	P63329	Serine/threonine-protein phosphatase 2B catalytic subunit alpha isoform	Ppp3ca	2.18112e-06	-0.22484	FDR1%	0.00173922	0.110202	FDR1%
2719	D4A062		Slitrk3	0.0154715	0.179756	ns	0.790943	-0.128272	ns
2720	D4A068		Pnma2	0.0338881	0.0738686	ns	0.0995651	-0.105679	ns
6769	Q761X5;A0A0G2JTK0;F1LM73;F1LNE2;O08722	Netrin receptor UNC5C;Netrin receptor UNC5B	Unc5c;Unc5b	0.503323	-0.0610335	ns	0.00212951	-0.167417	FDR1%
2404	D3ZRF6;M0R715		Pnpla6	0.908002	0.00230896	ns	8.11256e-05	-0.167343	FDR1%
1170	A0JN30		Cnpy2	0.00263453	-0.0572443	ns	3.23978e-09	-0.16674	FDR1%
5867	Q5M9H4;P13638	Sodium/potassium-transporting ATPase subunit beta-2	Atp1b2	0.431836	0.0162772	ns	0.0017003	-0.166565	FDR1%
2731	D4A0T8		Dhrs7	0.964927	-0.00104312	ns	0.620457	-0.0137825	ns
2732	D4A0U3		Zfp638	0.828996	-0.0292935	ns	0.217871	-0.100325	ns
2733	D4A0W1		Emc4	0.863418	0.0219005	ns	0.26976	-0.0276408	ns
2735	D4A0X3		Btbd8	0.0362987	-0.141706	ns	0.485956	0.0481497	ns
2737	D4A0Y6		Mki67	0.938271	-0.162966	ns	NA	NA	NA
2739	D4A104		Mrpl45	0.252633	0.0382853	ns	0.0452238	-0.0840769	ns
2740	D4A105		Tmem63b	0.00832544	0.0834755	ns	0.0145393	-0.133421	ns
2746	D4A133;A0A1W2Q6N0		Atp6v1a	0.204152	-0.0286491	ns	0.00685243	0.0396916	ns
2749	D4A188		Rgma	0.670738	-0.0296661	ns	0.841243	-0.0509319	ns
6293	Q63941;Q6P9W6;Q9QYT8	Ras-related protein Rab-3B	Rab3b	0.715363	0.0124039	ns	2.94883e-08	-0.16616	FDR1%
2750	D4A193	Receptor expression-enhancing protein	Reep1	0.889728	-0.0318361	ns	0.930379	-0.0296845	ns
2752	D4A197		Mcee	0.00421152	-0.093445	ns	0.00270684	-0.110156	ns
2755	D4A1B8		Dctn3	0.0905181	0.0302693	ns	0.681538	0.0249269	ns
3083	D4AAE9		Cisd2	0.0495401	0.034021	ns	9.05276e-11	-0.165953	FDR1%
2760	D4A1D3		Sacs	0.157466	-0.0457079	ns	0.786015	0.00816558	ns
6473	Q6AY18		Sar1a	0.00043273	0.148374	FDR1%	0.887154	0.0144735	ns
2766	D4A1J3		Palm3	0.315497	-0.0218831	ns	0.217867	0.174364	ns
2767	D4A1J6		Ankfy1	0.257618	0.00450132	ns	0.527811	0.0409598	ns
2770	D4A1Q9		Ttll12	0.00909516	0.0565509	ns	0.126883	0.0717154	ns
2771	D4A1R8		Cpne1	0.889423	0.0191606	ns	0.229335	0.0987067	ns
2774	D4A1V7;Q3T1J9	MOB kinase activator 1A	Mob1b;Mob1a	0.306524	0.0340526	ns	0.035004	0.217206	ns
2781	D4A206		Tcof1	NA	NA	NA	0.515664	0.0148554	ns
2782	D4A208;A0A0G2JZ92;B5DEJ1	SLIT-ROBO Rho GTPase-activating protein 2	Srgap2	0.0495082	-0.048291	ns	0.574869	0.00287544	ns
2786	D4A249		Mblac2	0.503129	-0.0199006	ns	0.593635	-0.0249629	ns
2789	D4A255		Tldc1	0.74949	-0.0416443	ns	0.549331	0.0700006	ns
2792	D4A263		Plekhb2	0.403177	0.0651611	ns	NA	NA	NA
2793	D4A264		Zadh2	0.347904	-0.055805	ns	0.144668	-0.0679662	ns
2796	D4A2B0;A0A0G2JXM5		Poldip3	0.096296	-0.0698175	ns	0.016662	-0.108984	ns
2798	D4A2D3;A0A1W2Q679		Mycbp2	0.927186	-0.0718617	ns	0.84693	-0.0819291	ns
2799	D4A2D7		Ipo4	0.207801	0.0860896	ns	0.532888	0.0581263	ns
280	A0A0G2JVR9;Q4FZU8	Protein FAM65A	Fam65a	0.855965	-0.0192371	ns	0.023217	0.160692	ns
2802	D4A2F1;F1LPF2;P25304-3;P25304-4;P25304-2;P25304-5;P25304-6;P25304	Agrin;Agrin N-terminal 110 kDa subunit;Agrin C-terminal 110 kDa subunit;Agrin C-terminal 90 kDa fragment;Agrin C-terminal 22 kDa fragment	Agrn	0.00167068	0.170033	ns	0.348465	0.0408921	ns
2803	D4A2F6		Nhlrc3	0.630874	0.0348647	ns	0.12028	0.131626	ns
2804	D4A2G9		Ranbp1	0.974272	-0.0100177	ns	0.0423871	0.0783976	ns
276	A0A0G2JVM2;A0A0G2K0A8			0.371108	0.0276366	ns	0.000138402	-0.165338	FDR1%
2809	D4A2L1;F1LSC8;A0A0G2K4J8;Q9JIR1	RIMS-binding protein 2	Rimbp2	0.705435	-0.0321121	ns	0.808579	0.041948	ns
2810	D4A2N1;A0A0G2JX45	Arginyl-tRNA--protein transferase 1	Ate1	0.56577	0.026313	ns	NA	NA	NA
2812	D4A2P1		Ccar1	0.440794	-0.0544687	ns	0.457887	-0.041812	ns
2815	D4A2Z8		Dhx36	0.268735	0.00252115	ns	0.343444	0.0267395	ns
2816	D4A304		Diras1	0.225823	-0.00180871	ns	0.024265	-0.0434081	ns
2817	D4A305		Ccdc58	0.717305	-0.0478818	ns	0.00465432	-0.0704722	ns
2820	D4A383;A0A0G2K0W3	Protein tweety homolog	Ttyh3	0.00403946	-0.0903626	ns	0.403962	0.0360114	ns
7005	Q9ES21	Phosphatidylinositide phosphatase SAC1	Sacm1l	0.0119253	0.0658581	ns	2.67443e-09	-0.164205	FDR1%
2822	D4A3D4		Abhd3	0.437918	-0.000586999	ns	0.0997168	-0.14461	ns
2823	D4A3D9		Stk32c	0.428883	0.0418635	ns	0.839928	0.0947687	ns
2824	D4A3E1		Hnrnpll	0.105911	0.0600276	ns	0.433847	-0.0395901	ns
2825	D4A3E3		Arid1a	0.988205	-0.0452938	ns	0.812956	0.0534527	ns
2826	D4A3E8;A0A0G2K6X0		Mrps27	0.507343	-0.0288586	ns	0.0466064	-0.0653635	ns
2827	D4A3H5	Chloride channel protein	Clcn6	0.00801711	0.0685616	ns	0.226037	-0.0890166	ns
2831	D4A3K5	Histone H1.1	Hist1h1a	0.149046	-0.154429	ns	0.742065	-0.0190964	ns
2832	D4A3L3		Megf9	NA	NA	NA	0.894856	0.0143154	ns
2834	D4A3M8		Nck2	0.373904	0.0135375	ns	0.560763	0.00811113	ns
2837	D4A3P1		Ubqln4	0.264485	0.0728878	ns	0.165131	-0.000313907	ns
284	A0A0G2JVU1;D3ZP06	Integrin beta	Itgb8	0.163264	-0.133171	ns	0.745796	0.0125116	ns
2845	D4A3T3		Cbx1	0.756204	0.0131534	ns	0.210522	0.023705	ns
1061	A0A0H2UHT6;D3ZM33;P62271;M0R5K9;A0A0G2KA79;D3ZAU6;D4AA93	40S ribosomal protein S18	LOC100362298;Rps18;LOC100912024;RGD1561919;RGD1565912	0.154334	0.0126033	ns	4.36075e-09	-0.163723	FDR1%
6239_m	Q63372;Q63372-1;Q63372-3;Q63372-4;Q63372-5;Q63372-6;Q63372-7;Q63372-8;Q63372-9;Q63372-10;Q63372-11;Q63372-12;Q63372-13;Q63373;Q63373-2;Q63373-3;Q63373-4;M0RBN6;A0A0U1RRR4	Neurexin-1;Neurexin-1-beta	Nrxn1	1.0703e-14	-0.142119	FDR1%	2.41958e-17	-0.221126	FDR1%
2849	D4A3V4		RGD1307500	0.875483	-0.0596595	ns	0.843493	-0.0350192	ns
2850	D4A3X0;Q7TP06		Seh1l;LOC307347	0.657561	0.0227918	ns	0.303968	-0.0053048	ns
1294	B0BNA7;M0RCH0	Eukaryotic translation initiation factor 3 subunit I	Eif3i	0.707644	0.00128776	ns	2.50595e-07	-0.163654	FDR1%
2854	I6L9I0;D4A414		Cox15	0.454903	-0.0195293	ns	0.07399	-0.0372434	ns
2855	D4A415		Fam175b	0.519926	-0.025931	ns	0.341147	0.0628142	ns
69	A0A097BVJ5;P13233	2,3-cyclic-nucleotide 3-phosphodiesterase	Cnp	1.00423e-08	0.1466	FDR1%	0.0328955	0.0721947	ns
2861	D4A465;A0A1B0GWT7		Lamtor2	0.720607	0.0145745	ns	0.00286494	0.0691692	ns
2862	D4A478		Ntpcr	NA	NA	NA	0.47485	-0.0157277	ns
2865	D4A4A9		Mrpl19	0.849403	0.0268052	ns	0.474929	-0.0503874	ns
356	A0A0G2JXD5;G3V773;Q03070	Beta-chimaerin	Chn2	0.000304521	0.146441	FDR1%	0.750351	0.0148164	ns
6603	Q6IUR5	Neudesin	Nenf	0.314956	-0.00118793	ns	9.70676e-05	-0.163325	FDR1%
2869	D4A4J0		Supt16h	0.0890876	0.0246757	ns	0.119496	-0.112253	ns
287	A0A0G2JVW5;E9PSZ5;Q5RJQ1		Huwe1	0.684758	0.00176964	ns	0.0028483	-0.0616382	ns
2871	D4A4K4		Vps13c	0.319439	-0.0297859	ns	0.143592	-0.0399573	ns
6189_m	Q62807;A0A0G2K9H6;A0A0U1RRV6;A0A0U1RRS2	Synaptotagmin-17	Syt17	0.178271	-0.0941257	ns	8.69357e-05	-0.16316	FDR1%
5940	Q5RK17;D4A7Z5		Diablo;LOC100360940	0.146805	-0.0437245	ns	2.97721e-05	-0.163024	FDR1%
3993	G3V796;P08503	Medium-chain specific acyl-CoA dehydrogenase, mitochondrial	Acadm	0.705928	-0.000220268	ns	0.00064551	-0.162511	FDR1%
2877	D4A4P4;B1WBY2		Flad1	0.426333	-0.0279966	ns	0.646715	0.0328422	ns
3668	F1M471		Epm2aip1	1.71969e-08	0.14342	FDR1%	0.0293252	0.0752209	ns
288	A0A0G2JW01;Q3KR72;E9PT39;A0A0G2K5D0		Ablim1	0.454995	-0.0843001	ns	0.936887	0.00432756	ns
2881	D4A4T0;I6L9H8		Stub1	0.364457	0.060095	ns	0.406257	0.0152888	ns
2883	D4A4T9	Cysteine and histidine-rich domain-containing protein 1	Chordc1	0.725879	-0.00409299	ns	0.487948	0.0406537	ns
2886	D4A4U3		Mdp1	0.528162	-0.00475066	ns	0.82871	0.083572	ns
2887	D4A4W6		Slirp	0.149556	-0.0344024	ns	0.361004	-0.0423571	ns
4372	M0RD75;P62755	40S ribosomal protein S6	Rps6	0.044956	0.0624604	ns	1.2576e-05	-0.161779	FDR1%
2892	D4A507		Clip3	0.346343	0.0703959	ns	0.00626378	0.144136	ns
2893	D4A510		Smarcc2	0.900095	0.0329522	ns	0.972781	-0.0166362	ns
2894	D4A511	Signal recognition particle 9 kDa protein	Srp9	0.111342	0.0932107	ns	0.713227	0.000325585	ns
2895	D4A517		Slc39a10	0.279756	-0.0447806	ns	0.516263	-0.0278585	ns
5330	Q1JU68;Q4G020	Eukaryotic translation initiation factor 3 subunit A	Eif3a	0.662435	0.0100716	ns	8.31113e-15	-0.161363	FDR1%
5578	Q4V7D4		Fam126b	0.304446	-0.0112664	ns	6.067e-06	-0.161333	FDR1%
2904	D4A565		Ndufb5	0.811281	0.0222435	ns	0.373214	-0.00254926	ns
2909	D4A5A6	DNA-directed RNA polymerase	Polr2a	0.743087	0.0309395	ns	NA	NA	NA
4957	P51907	Excitatory amino acid transporter 3	Slc1a1	0.0012241	-0.107479	ns	0.000388294	-0.161279	FDR1%
2912	D4A5F7		Vps8	0.578877	0.0597627	ns	0.0699792	-0.0385157	ns
99	A0A0G2JSG6;P29410-2;P29410	Adenylate kinase 2, mitochondrial;Adenylate kinase 2, mitochondrial, N-terminally processed	Ak2	0.802694	0.00237948	ns	0.000222898	-0.15932	FDR1%
2914	D4A5I9		Myo6	0.89689	0.0230446	ns	0.145844	-0.0699232	ns
2915	D4A5J1		Kbtbd11	0.619564	-0.0151877	ns	0.799461	0.0697905	ns
2917	D4A5K6		Zmpste24	0.0450414	0.108567	ns	0.644901	0.00647646	ns
2919	D4A5L9;P62898;CON__P62894;P10715	Cytochrome c, somatic;Cytochrome c, testis-specific	LOC679794;Cycs;Cyct	0.0103243	-0.0867575	ns	0.0293681	-0.0970381	ns
292	A0A0G2JW28;D3ZCH7;G3V9D7		Add3	0.615673	-0.0331338	ns	0.0881853	-0.0378918	ns
5389	Q3B8R7		Mrpl47	0.650435	0.00817736	ns	0.000683769	-0.159314	FDR1%
2925	D4A5T1		Sf3b5	NA	NA	NA	0.365417	-0.100286	ns
2926	D4A5W8		Pgs1	0.0235207	-0.0687025	ns	0.109247	-0.045109	ns
2928	D4A5X7		Gdap1	0.00238142	-0.102106	ns	0.976869	0.00282984	ns
2929	D4A604		Pigt	0.587134	0.0358901	ns	0.417856	-0.0193912	ns
2932	D4A631	Brefeldin A-inhibited guanine nucleotide-exchange protein 1	Arfgef1	0.579515	0.0195753	ns	0.456834	0.135236	ns
2934	D4A634		Ranbp6	0.00722328	-0.0776623	ns	0.0759067	-0.0594889	ns
2935	D4A644		Map7d1	0.58958	0.00310381	ns	0.283676	0.00794669	ns
2938	D4A6C5		Arhgap1	0.741823	-0.0177092	ns	0.772847	-0.00407627	ns
2939	D4A6D7;D4A6D7-2	Tetratricopeptide repeat protein 19, mitochondrial	Ttc19	0.161144	-0.0808917	ns	0.830711	0.00611166	ns
294	A0A0G2JW50;F1LXD6		Pitpnm2	0.632377	0.0242536	ns	0.125837	-0.101934	ns
2941	D4A6D9		Hs1bp3	0.860716	-0.0251241	ns	0.861596	0.0499821	ns
2942	D4A6F2		Lynx1	0.0556462	0.0531289	ns	0.0148025	-0.0922854	ns
4414	O35112	CD166 antigen	Alcam	0.435442	-0.00470638	ns	1.01048e-06	-0.158325	FDR1%
1736	D3ZCH6;B5DF79;A0A0G2K9L0		Rnaset2	0.0010767	0.142889	FDR1%	0.0221683	0.0726	ns
295	A0A0G2JW52;O70467	Protein arginine N-methyltransferase 3	Prmt3	0.272294	0.145678	ns	0.0463178	0.144942	ns
2951	D4A6P1		Sez6l2	0.00156785	-0.101577	ns	0.858113	0.0937059	ns
2954	D4A6U0;Q5M868;Q5M868-2	Non-lysosomal glucosylceramidase	Gba2	0.499428	0.00173409	ns	0.938295	0.0121173	ns
2955	D4A6U1;A0A1W2Q6C2		Adam11	2.88996e-14	-0.306035	FDR1%	5.34003e-11	-0.213923	FDR1%
4360	M0RC65		Cfl2	0.668883	0.00137752	ns	3.65752e-08	-0.1583	FDR1%
2962	D4A719;A0A096MKE2;A0A096MKG7		Snx12	0.802774	-0.0249195	ns	0.876359	0.0660848	ns
2963	Q4KLJ1;D4A720		Srsf7	0.747613	0.0725456	ns	0.161715	-0.00956918	ns
2965	D4A732		Mvb12b	0.295084	0.0235853	ns	0.402505	0.105395	ns
2966	D4A742		Romo1	0.00932741	0.0798474	ns	0.0585738	-0.135916	ns
2967	D4A746		Gmppb	0.802547	-0.0411562	ns	0.782908	0.0106735	ns
2968	D4A758		Lrrc8b	0.20267	0.0718949	ns	0.193943	0.108387	ns
2969	D4A769;A0A1W2Q6M8		Samd4b	0.0872773	0.0721966	ns	0.0178033	-0.0348848	ns
2971	D4A771;D3ZZN4;P04646;A0A096P6M4;F1M0T2	60S ribosomal protein L35a	LOC100362049;LOC100362338;Rpl35a	0.0014501	0.0980986	ns	0.0959653	-0.0722817	ns
2972	D4A772		Dtna	0.509381	0.0533461	ns	0.0745371	-0.119987	ns
457	A0A0G2JZI2;Q6TXE9;Q5I0H2		Eprs	1.08958e-08	0.108178	FDR1%	0.00145631	-0.0652332	FDR1%
2974	D4A7A8		Rab7b	0.0424908	-0.117481	ns	0.0295083	0.115535	ns
2982	D4A7H9		Chmp7	0.205369	-0.0782581	ns	0.953637	0.0420418	ns
2983	D4A7I6		RGD1309995	0.0257386	0.0805356	ns	0.732326	0.0803921	ns
2986	D4A7J8		Prpf4	0.151924	0.0468427	ns	0.933984	-0.00726292	ns
2988	D4A7L4		Ndufb11	0.235692	-0.0162111	ns	0.0513976	-0.0847962	ns
2990	D4A7M0		Plxnc1	0.00733644	-0.0889606	ns	0.0168531	0.055619	ns
2991	D4A7N1	MICOS complex subunit Mic25	Chchd6	0.923984	-0.00623395	ns	0.659058	-0.0195358	ns
2995	D4A7R0	Signal recognition particle subunit SRP72	Srp72	0.00666424	0.108437	ns	0.161008	-0.0632246	ns
2996	D4A7R3		Nup205	0.22093	0.0910807	ns	0.882403	0.0443862	ns
2998	D4A7U1;Q99MM3		Zyx	0.179881	0.0799798	ns	0.00684177	0.202283	ns
3	A0A059NZR0;Q6AXU6	Hematological and neurological expressed 1 protein;Hematological and neurological expressed 1 protein, N-terminally processed	Hn1	0.385141	-0.0247291	ns	0.0400228	0.26541	ns
3000	D4A7U6		Lsm3	0.69298	-0.0111941	ns	0.016691	0.0551795	ns
3008	D4A830		Ppa2	0.442724	0.0176064	ns	0.522373	-0.0393394	ns
301	A0A0G2JW85;Q9QYJ2;F1LSI5	Ras GTPase-activating protein 3	Rasa3	0.606343	0.0143119	ns	0.0230974	-0.0647524	ns
3010	D4A833		Mrps30	0.37543	-0.00128592	ns	0.0723218	-0.0989998	ns
3011	D4A857		Ipo9	0.435085	0.0227451	ns	0.103484	0.0485926	ns
3013	D4A899		Vps13a	0.751029	0.0152904	ns	0.519999	0.00523559	ns
3014	D4A8A0		Cad	1.18447e-07	0.139243	FDR1%	0.349268	0.0134537	ns
3018	D4A8F2		Rsu1	0.539094	0.0507138	ns	0.980646	0.0612342	ns
302	A0A0G2JW88			0.407772	0.00594279	ns	0.924	0.0175148	ns
3020	D4A8G0		Lsm12	0.0067516	0.131515	ns	0.456004	0.0219135	ns
3022	D4A8G7		Snw1	0.0300211	-0.0773848	ns	0.017628	-0.0505789	ns
3023	D4A8H3		Uba6	0.0289442	0.0478711	ns	0.459803	-0.0371864	ns
3025	D4A8H8		Cyfip1	0.0872419	-0.0631302	ns	0.108963	-0.0503815	ns
3028	D4A8L9		Btbd17	0.848197	-0.07794	ns	0.88605	0.0728752	ns
3029	D4A8N1		Dpm1	0.0248511	0.104585	ns	0.198276	-0.0859417	ns
3030	D4A8N2		Fdx1l	0.0686728	-0.150968	ns	NA	NA	NA
1690	B5DEL9;P62083	40S ribosomal protein S7	Rps7	0.770216	0.0273936	ns	4.75002e-05	-0.157427	FDR1%
3035	D4A8V2		Ccdc177	0.00200921	-0.148151	ns	0.446621	0.0150425	ns
3039	D4A914		Xrn2	0.383211	0.0538115	ns	0.895731	0.00356785	ns
3042	D4A932		Plekhm2	0.400361	-0.0739249	ns	0.00877589	-0.173471	ns
3043	D4A944		Snrnp40	0.682008	0.0325885	ns	0.692866	-0.0419078	ns
5066	P62630;M0R757;F1M6C2	Elongation factor 1-alpha 1;Elongation factor 1-alpha	Eef1a1;LOC100360413;LOC100360150	2.95868e-05	0.138597	FDR1%	0.201979	0.00815236	ns
3046	D4A994		Emc1	0.0084498	0.0785002	ns	0.0980691	-0.0466844	ns
3047	D4A997		Htatsf1	NA	NA	NA	0.0171179	0.143277	ns
3048	D4A9A3		Cenpv	0.429231	0.0251194	ns	0.0609152	0.0291207	ns
305_m	A0A0G2JWA3;F1LQM9;Q5U3Y1		Xpo7	0.255243	-0.0381056	ns	0.0844161	0.0901532	ns
5784	Q5GFD9	Protein IMPACT	Impact	0.201404	0.0669568	ns	2.97548e-07	-0.156816	FDR1%
3051	D4A9D8	Oxysterol-binding protein	Osbp	0.0111177	0.0703668	ns	0.0547199	0.0323558	ns
3667	F1M446		AI314180	3.34181e-05	0.13611	FDR1%	0.446259	0.00266024	ns
4787	P23711	Heme oxygenase 2	Hmox2	0.290897	0.0384345	ns	0.000240067	-0.156682	FDR1%
6662	Q6P6T4;Q6P6T4-2	Echinoderm microtubule-associated protein-like 2	Eml2	0.187048	-0.0125867	ns	3.55809e-05	-0.156492	FDR1%
3067	D4A9V7		LOC100911305	0.76669	0.0285851	ns	0.474082	-0.269769	ns
3071	D4A9Z6		Mrps35	0.985516	0.00046957	ns	0.428984	-0.05247	ns
3075	D4AA13		Dmxl1	0.693724	-0.0810165	ns	0.0121642	-0.15361	ns
2073	D3ZF86		Arfgef3	0.433534	0.00345765	ns	6.2202e-10	-0.155881	FDR1%
3077	D4AA35		Asmtl	0.0559674	0.121721	ns	NA	NA	NA
3788	F1MA42		Sez6	0.0141239	-0.191726	ns	0.000212308	-0.155487	FDR1%
1351	F1M013;D3ZU22;B0K021;P62425;D3ZPL5;M0R3M3;F1M1M2;D4A8X2;F1M0S7;M0R7A4	60S ribosomal protein L7a	LOC100910109;LOC100361311;LOC100911966;Rpl7a;RGD1562953;RGD1563220	0.00322498	0.0764256	ns	0.000870308	-0.155208	FDR1%
3084	D4AAG8		Smchd1	0.180962	0.084095	ns	0.457319	0.0571171	ns
3085	D4AAH6		Psmg1	NA	NA	NA	0.568955	0.0753367	ns
3086	D4AAH9		Tbc1d23	0.672759	-0.0169966	ns	0.736418	-0.0418377	ns
3089	D4AAM0;A0A0G2K8P2		Tnpo3	0.0338832	0.0634798	ns	0.0899116	0.0703663	ns
309	A0A0G2JWC6;G3V7W8;O08654	UPF0183 protein C16orf70 homolog	RGD621098	0.133519	-0.0112632	ns	0.291392	0.0793331	ns
3092	D4AAT4		Snrpf	0.304259	-0.0663156	ns	0.550714	-0.0559893	ns
3093	D4AAU4		Rprd1a	0.012494	0.16008	ns	0.161837	-0.0578501	ns
3095	D4AAX6	Phosphoinositide phospholipase C	Plch2	0.669903	-0.0417338	ns	0.455698	-0.0394814	ns
3098	D4AB01		Hint2	0.604035	-0.032846	ns	0.981972	0.00521473	ns
4945	P51146	Ras-related protein Rab-4B	Rab4b	0.581213	0.043981	ns	0.00117339	-0.154385	FDR1%
310	Q5XI19;A0A0G2JWC7		Fermt2	0.733568	0.0248055	ns	0.0534842	-0.0349322	ns
4213	H2BF30;Q920R3	Fatty acid desaturase 1	Fads1	0.000100441	-0.191151	FDR1%	0.000490763	-0.211691	FDR1%
3104	D4AB66	Stonin-2	Ston2	0.638108	0.0629726	ns	0.99198	0.13062	ns
3110	D4ABD7		Trip11	0.585639	0.00482265	ns	0.0480515	-0.0963191	ns
3111	D4ABI6;Q91Y78	Ubiquitin carboxyl-terminal hydrolase;Ubiquitin carboxyl-terminal hydrolase isozyme L3	Uchl3	0.810911	0.012487	ns	0.111971	0.0701247	ns
3112	D4ABI7		LOC100365676	0.607015	0.0300406	ns	0.106726	-0.0456879	ns
5997	Q5U2S7		Psmd3	7.49325e-08	0.135774	FDR1%	0.531546	0.0351284	ns
3114	D4ABK7		Hnrnph3	0.801937	-0.0211988	ns	0.499543	-0.0259151	ns
3115	D4ABM3		Daam1	0.0158739	-0.0942612	ns	0.430741	-0.0451201	ns
3116	D4ABM5		Mrps34	0.569216	-0.0221878	ns	0.770148	-0.0457523	ns
6579	Q6GMN2-2;Q6GMN2	Brain-specific angiogenesis inhibitor 1-associated protein 2	Baiap2	6.94101e-18	-0.210468	FDR1%	5.95842e-11	0.184241	FDR1%
4616	P09895;D3ZHP8	60S ribosomal protein L5	Rpl5;Rpl5l1	0.550973	0.040155	ns	5.13248e-05	-0.153073	FDR1%
3122	D4ABS5		Pithd1	0.74343	-0.030521	ns	0.0950808	0.182393	ns
3125	D4ABT8		Hnrnpul2	0.514412	-0.0203248	ns	0.849379	-0.0156685	ns
3127	D4ABV0		RGD1566320	0.0172429	-0.0922136	ns	0.0132227	-0.196758	ns
3128	D4ABX8	Leucine-rich repeat and fibronectin type-III domain-containing protein 4	Lrfn4	0.462288	-0.0627542	ns	0.943507	-0.0197159	ns
3129	D4ABX9		Emc6	0.0880707	0.10199	ns	0.0735104	-0.087653	ns
3131	D4ABZ4		Otud7a	0.492796	-0.0321157	ns	0.370843	0.0578858	ns
3291	F1LM29;F1LZI7;P58751-3;P58751-2;P58751	Reelin	Reln	0.000972907	0.134787	FDR1%	NA	NA	NA
5220	P97629;A0A0G2JUW8;A0A0H2UHK5;A0A0G2JYN3;Q8R438	Leucyl-cystinyl aminopeptidase	Lnpep	0.0177439	0.0227026	ns	2.37718e-05	-0.152982	FDR1%
3136	D4AC65		Coa7	0.116612	-0.124193	ns	0.884884	0.0175678	ns
3139	D4ACA5		LOC100911130	0.141239	0.0551327	ns	0.370662	-0.0321968	ns
4579	Q6P7A7;P07153	Dolichyl-diphosphooligosaccharide--protein glycosyltransferase subunit 1	Rpn1	2.0414e-09	0.134762	FDR1%	0.265407	-0.0693441	ns
3144	D4ACG2		Ilvbl	0.164268	0.065277	ns	0.874569	-0.0700786	ns
6536	Q6AYK8	Eukaryotic translation initiation factor 3 subunit D	Eif3d	0.953437	-0.0104702	ns	0.000911873	-0.152327	FDR1%
3147	D4ACK1		Nup214	0.214823	-0.117866	ns	0.434533	0.0149094	ns
3148	D4ACK7		Cnnm3	0.59066	0.0329177	ns	0.0127168	0.160255	ns
3150	D4ACM1		Elp3	0.426862	0.00798615	ns	0.658907	-0.0645335	ns
3153	D4ACN8	Plasminogen receptor (KT)	Plgrkt	0.724443	0.00975605	ns	0.225007	-0.0610323	ns
4067	Q6P7S6;G3V836;P05371;Q9ERD1;O35510;A0A0G2KB42	Clusterin;Clusterin beta chain;Clusterin alpha chain	Clu	0.00961553	0.133073	ns	0.00211744	-0.152162	FDR1%
3160	D4ACW1		Nop2	0.0019724	0.134314	ns	0.38838	0.0612591	ns
3167	D4AD15;D3ZU13;M0RD03		Eif4g1;LOC100911431;LOC100912571	0.0605529	0.0351642	ns	0.0102532	-0.0649132	ns
3168	D4AD29		Lamtor4	0.977827	-0.00695417	ns	0.0107847	0.0344784	ns
317	A0A0G2JWJ0;D4A1S6;D3ZR53;Q10728-2;Q10728;D4ACS0;Q10728-3	Protein phosphatase 1 regulatory subunit;Protein phosphatase 1 regulatory subunit 12A	Ppp1r12a	0.286676	-0.0986594	ns	0.239858	-0.135504	ns
3172	D4AD37;Q7TPJ5	Inositol monophosphatase 3	Impad1;LOC100910881	0.239101	0.0680551	ns	0.0271315	-0.0565333	ns
3992	G3V790;Q8K1P7;B5DFE9;Q63071	Transcription activator BRG1	Smarca4	0.000132283	0.134407	FDR1%	0.827918	-0.0254942	ns
3175	D4AD89		Sez6l	0.0221859	-0.0775318	ns	0.227005	0.0391366	ns
2583	D3ZWJ9		RGD1306151	0.754218	-0.0228802	ns	0.000101482	-0.15134	FDR1%
1876	D3Z955		Pgm2l1	2.7249e-05	0.13362	FDR1%	0.259649	-0.0475548	ns
3183	D4ADE5	Histone-lysine N-methyltransferase SETD7	Setd7	0.0252907	0.0903515	ns	0.0169576	0.124957	ns
3185	D4ADF5		Pdcd5	0.841623	-0.00464286	ns	0.0215957	0.150607	ns
3186	D4ADG2		Iba57	0.776681	-0.0496849	ns	0.168777	-0.00431504	ns
3189	D4ADS4		Mgst3	0.178233	0.0182561	ns	0.177492	-0.0470153	ns
3191	D4ADS9		Efr3a	0.101395	-0.0797971	ns	NA	NA	NA
3197	D4AE00	AP-3 complex subunit beta	Ap3b2	0.939122	0.00546223	ns	0.357002	0.0326929	ns
3198	D4AE02		Fam98b	0.863361	0.00756354	ns	0.174248	-0.0633261	ns
3200	D4AE06;D4A6E5	Peptidyl-prolyl cis-trans isomerase	Fkbp15	0.203996	-0.00954569	ns	0.744117	0.0466968	ns
1570	B2RYU2;P23358;A0A140TAC5;M0R4B6;D3ZJE2;D4A8N3	60S ribosomal protein L12	Rpl12;Rpl12-ps1;RGD1563956	0.0334997	0.000205291	ns	3.77989e-05	-0.151309	FDR1%
3203	D4AE49;Q5BJW0		Skiv2l2	0.0322905	0.134278	ns	0.685861	-0.116195	ns
3205	D4AE56		Ptges2	0.845687	-0.0462152	ns	0.0542019	-0.106597	ns
5087	P62890;A0A0G2K5E6	60S ribosomal protein L30	Rpl30	0.843262	0.00925946	ns	0.00179455	-0.151222	FDR1%
321	A0A0G2JWM2;Q5RJQ4	NAD-dependent protein deacetylase sirtuin-2	Sirt2	0.00835437	0.101529	ns	0.0959196	0.0504288	ns
6699	Q6PDV7;D4A1P2	60S ribosomal protein L10	Rpl10;Rpl10l	0.00536013	0.133075	ns	0.00024713	-0.151088	FDR1%
3214	D4AE96		Ipo7	0.00736384	0.0744932	ns	0.214032	0.0270193	ns
3215	D4AEC2;A0A0G2K7K9		Camsap2	0.0412327	-0.0343466	ns	0.0147478	-0.142005	ns
4931	P49242;M0R6L4	40S ribosomal protein S3a;40S ribosomal protein S3b	Rps3a;LOC100365839	0.00309286	0.0735378	ns	0.00123836	-0.150998	FDR1%
1314	B0BNG3		Lman2	5.5434e-05	0.13121	FDR1%	0.0127027	-0.0842147	ns
1750	B5DFC8	Eukaryotic translation initiation factor 3 subunit C	Eif3c	0.00277132	0.04636	ns	1.57776e-11	-0.150431	FDR1%
3223	D4AEI5;A0A0G2K402		Myef2	0.895215	0.0223777	ns	0.120138	-0.0306425	ns
3228	D4AEK9		Ccdc6	0.258972	0.0310079	ns	0.0306573	0.112584	ns
452	A0A0G2JZG7;Q6P799	Serine--tRNA ligase, cytoplasmic	Sars	0.0523896	0.0716654	ns	7.0077e-08	-0.148489	FDR1%
3233	D4IGX4;Q6EV76	Alpha-(1,6)-fucosyltransferase	Fut8	0.160594	0.110206	ns	0.557995	0.0112296	ns
3234	D5MTG9;D3ZQC6		Ubr1	0.304992	-0.0678014	ns	0.950032	-0.0230685	ns
3236	D7NIW0;F1LRN8;A0A0G2JXP3;A0A0G2JUY1;Q5U1Z5;Q6P778		Nedd4l	0.161155	0.0473011	ns	0.212397	-0.0437547	ns
5091	P62914;Q4V8I6;A0A0G2K3Y8	60S ribosomal protein L11	Rpl11	0.000120098	0.13078	FDR1%	0.106063	-0.107743	ns
3238	E2CWF1;Q6AYJ0;E2CWF0;E2CWF2	Serine/threonine-protein phosphatase	Ppp3cc	NA	NA	NA	0.266458	-0.0422096	ns
3239	E2RUH2;A0A0G2K9E0;P29315	Ribonuclease inhibitor	Rnh1	0.13446	0.0518361	ns	0.0107512	0.0598311	ns
3241	E9PSJ4;A0A0G2K6E8;B5DF76		Spag9	0.936159	0.0397507	ns	0.302939	-0.0261409	ns
3242	E9PSK7;B0VXR4;Q761U5;Q761U4		Mapk8ip3;JSAP1	0.635267	-0.0077738	ns	0.0727461	0.0306563	ns
3245	E9PST5		Acin1	0.0941723	-0.0776187	ns	0.143627	-0.107268	ns
325_m	B4F7F1;A0A0G2JWP1;A0A0G2K6F9			0.0211319	0.0849824	ns	0.410578	-0.00905228	ns
3251	E9PT51		Poldip2	0.219701	0.0143937	ns	0.81438	-0.00938119	ns
3252	E9PT53;Q9JLT5		Wfs1	0.570774	-0.0617434	ns	0.0821477	0.111653	ns
4754	Q5U330;Q8CJD2;P19686	Guanylate cyclase soluble subunit alpha-3	Gucy1a3	0.682378	0.0432248	ns	0.000940475	-0.148417	FDR1%
3256	E9PT83		Cenpf	0.156483	0.0451825	ns	NA	NA	NA
3260	Q58GH6;E9PTA4		Adam9	0.408603	0.00796862	ns	0.477694	-0.0951518	ns
3262	E9PTB2;A0A1W2Q6F0;A0A1W2Q689;Q63403	Transcription elongation factor SPT5	Supt5h	0.0511269	0.138636	ns	0.0612005	0.136299	ns
3265	E9PTB7;A0A0G2JXZ9;Q62884	Protein-tyrosine-phosphatase	Ptprj	0.188298	0.0377239	ns	0.227394	-0.0150868	ns
5114	P63047;Q06FK3	Sulfotransferase 4A1;Sulfotransferase	Sult4a1	0.0284726	0.0637723	ns	0.000204234	-0.147226	FDR1%
3272	Q5BK42;E9PTK4		Thnsl1	0.557225	-0.0330006	ns	0.134017	-0.0607083	ns
4729	P18163	Long-chain-fatty-acid--CoA ligase 1	Acsl1	0.782555	-0.00951275	ns	0.000254026	-0.147179	FDR1%
3278	Q9QX10;E9PTX9;Q9R1N0;Q9Z267		Slc12a2;NKCC1	0.31824	0.0602816	ns	0.0271637	-0.0615451	ns
3279	E9PU01		Chd4	0.889144	-0.00152531	ns	0.676961	-0.0212802	ns
967	D3Z899;A0A0G2KAE6		Fam73b	0.387059	0.0321785	ns	0.000894523	-0.147173	FDR1%
3284	E9PU34;Q1W176		Rmnd1	0.802903	-0.00121002	ns	0.924929	0.0217729	ns
3287	F1LLX6		Cadps	0.138842	-0.046027	ns	0.315267	-0.0597641	ns
3288	F1LM09;Q4VSI4	Ubiquitin carboxyl-terminal hydrolase;Ubiquitin carboxyl-terminal hydrolase 7	Usp7	0.0375607	0.0653261	ns	0.40983	0.00920937	ns
3290	F1LM28;P97526;A0A0G2JWL3	Neurofibromin	Nf1	0.591319	0.00833825	ns	0.403277	-0.00706376	ns
4086	G3V8B6;A0A0G2JTW5;O88761;Q5PPJ7;A1A5N2;Q3KR62	26S proteasome non-ATPase regulatory subunit 1	Psmd1	7.97837e-14	0.129482	FDR1%	0.0174999	0.0336052	ns
5416	Q3MIE9		Sms	1.927e-08	0.181591	FDR1%	0.00119791	0.0869994	FDR1%
3299	F1LM66;Q5EB83;A0A1W2Q6N7		Eftud2	0.504971	0.0418079	ns	0.612733	0.0150413	ns
3302	F1LMB9;O54921;A0A0G2K888;A0A0G2K1K8	Exocyst complex component 2	Exoc2	0.409405	0.0413588	ns	0.47498	0.0155677	ns
3304	F1LMD9;P97874	Cyclin-G-associated kinase	Gak	0.177253	-0.00473404	ns	0.663952	0.0046132	ns
3967	G3V6Z7;Q3ZU82	Golgin subfamily A member 5	Golga5	0.464525	-0.0204804	ns	4.77327e-07	-0.14707	FDR1%
6263	Q63569;Q6P6U2	26S protease regulatory subunit 6A	Psmc3	4.37813e-13	0.129377	FDR1%	0.0156588	0.0398914	ns
3739	F1M853		Rrbp1	0.0935617	0.0758796	ns	6.75148e-10	-0.146206	FDR1%
3310	F1LMM8;Q64536;Q9JID3	[Pyruvate dehydrogenase (acetyl-transferring)] kinase isozyme 2, mitochondrial	Pdk2	0.565899	-0.0429512	ns	0.00350995	0.159659	ns
3311	F1LMN8;Q9JLP1	KH domain-containing, RNA-binding, signal transduction-associated protein 3	Khdrbs3	0.251843	-0.0586679	ns	0.550467	0.0329176	ns
3312	Q3B8P5;F1LMQ3		Psmd8	0.00142865	0.106972	ns	0.782704	0.0490122	ns
3313	F1LMR7;P46101-2;P46101	Dipeptidyl aminopeptidase-like protein 6	Dpp6	0.0011793	-0.0922243	ns	0.68241	0.0310389	ns
3315	F1LMT5;Q925N3	PEX5-related protein	Pex5l	0.514998	0.0105022	ns	0.449673	-0.00657963	ns
6517	Q6AYD3;Q6AYD3-2;A0A0G2JVS2	Proliferation-associated protein 2G4	Pa2g4	0.00310084	0.101398	ns	0.00144349	-0.145961	FDR1%
6453	Q6AXR4;F1LR87	Beta-hexosaminidase subunit beta	Hexb	0.000725871	0.128611	FDR1%	0.0506666	0.0915528	ns
1472	B2GV24;A0A0G2K266	E3 UFM1-protein ligase 1	Ufl1	0.0444867	0.04449	ns	1.33803e-07	-0.145908	FDR1%
3322	F1LMZ4;Q5BJP6	Ribosome-releasing factor 2, mitochondrial	Gfm2	0.414853	-0.0946202	ns	0.110671	-0.0189923	ns
3323	F1LMZ8	26S proteasome non-ATPase regulatory subunit 11	Psmd11	0.0298084	0.0352345	ns	0.652083	0.0250372	ns
3328	F1LN46;Q3KR63	Carnitine O-palmitoyltransferase 1, brain isoform	Cpt1c	0.407023	-0.059635	ns	0.366455	-0.0294802	ns
6909	Q8VHJ9		Syne1	0.403512	-0.0636137	ns	0.000232481	-0.145741	FDR1%
3330	F1LN69;A0A0G2JV77;A0A0G2K382;F1LP90;Q5EB61;Q3SYQ1	Misshapen-like kinase 1	Mink1;LOC303259	0.00356107	-0.112485	ns	0.160167	0.0383951	ns
6956	Q99M64	Phosphatidylinositol 4-kinase type 2-alpha	Pi4k2a	0.0240281	0.0708052	ns	3.29014e-05	-0.145675	FDR1%
3334	F1LNB3;Q66HA0		Akap10	NA	NA	NA	0.0767656	0.0659843	ns
3336	F1LNC4;P58200	Vesicle transport through interaction with t-SNAREs homolog 1B	Vti1b	0.959759	-0.0153116	ns	0.334944	-0.145957	ns
3337	F1LNE5;Q4QQR9	Protein MEMO1	Memo1	0.301972	-0.0440254	ns	NA	NA	NA
3338	F1LNF0		Myh14	0.969554	-0.0206249	ns	0.752688	0.0159536	ns
334	A0A0G2JWU3;F1M9A4;B5DER4;D3ZFE9;A0A0G2JUV4		Mrpl1	0.87997	-0.0138048	ns	0.264794	-0.0687433	ns
3343	M3ZCQ2;F1LNJ2;Q4KLH1	U5 small nuclear ribonucleoprotein 200 kDa helicase	Snrnp200	0.458928	0.0258176	ns	0.166821	-0.0120132	ns
3344	F1LNK0;A0A0U1RS09;P15146;Q78DZ1;P15146-4;A0A0U1RRQ0	Microtubule-associated protein;Microtubule-associated protein 2	Map2	0.464286	-0.0651157	ns	0.0129851	0.196971	ns
2046	D3ZEH9;G3C8Z1;Q5XIQ4	E3 ubiquitin-protein ligase MGRN1	Mgrn1	0.340484	0.0102045	ns	3.20208e-05	-0.14512	FDR1%
6392	Q66HM7;P38656;Q4V8Q3;D3ZLH9	Lupus La protein homolog	Ssb;LOC680385	2.20404e-06	0.128359	FDR1%	0.101497	-0.0661762	ns
2483	D3ZTX0	Transmembrane emp24 domain-containing protein 7	Tmed7	1.17116e-05	0.128134	FDR1%	0.607506	0.0143544	ns
4895	P41542	General vesicular transport factor p115	Uso1	0.28433	-0.0294111	ns	1.79207e-16	-0.144339	FDR1%
3352	F1LNX7;Q5PPK9	Protein TSSC1	Tssc1	0.771806	0.00337397	ns	0.0243191	0.0620493	ns
4177	G3V9D3;F1LQ92;Q80Z70;Q925P0	Protein sel-1 homolog 1	Sel1l	0.212969	0.0179321	ns	0.000545376	-0.144141	FDR1%
178	A0A0G2JTL5;P52873	Pyruvate carboxylase, mitochondrial	Pc	0.000266147	-0.0407458	FDR1%	1.05965e-38	-0.211168	FDR1%
3357	F1LP21;Q9WVA1;F1M556;D3ZV76	Mitochondrial import inner membrane translocase subunit Tim8 A	Timm8a1;Timm8a;Timm8a2	0.53052	-0.0128776	ns	0.338335	-0.00122611	ns
3359	F1LP30;Q5I0C3	Methylcrotonoyl-CoA carboxylase subunit alpha, mitochondrial	Mccc1	0.495051	-0.0219599	ns	0.951961	-0.0216358	ns
3362	F1LP76;Q8VHU4	Elongator complex protein 1	Ikbkap	0.0293298	0.0652262	ns	0.334799	0.0245486	ns
4784	P23514	Coatomer subunit beta	Copb1	0.000360539	0.108104	FDR1%	1.94988e-13	-0.183643	FDR1%
4649	P10888	Cytochrome c oxidase subunit 4 isoform 1, mitochondrial	Cox4i1	7.34771e-05	-0.117925	FDR1%	1.0693e-12	-0.210464	FDR1%
6619	Q6MG08	ATP-binding cassette sub-family F member 1	Abcf1	0.518392	0.0653918	ns	0.000846072	-0.143458	FDR1%
5497	Q4G061	Eukaryotic translation initiation factor 3 subunit B	Eif3b	0.447567	0.00484293	ns	5.45184e-05	-0.143204	FDR1%
3369	F1LPC6;Q9JHW1;A0A0G2JY30;Q9JHW1-2	Carboxypeptidase D	Cpd	0.226874	-0.0636181	ns	0.512326	-0.0414717	ns
3370	F1LPC7;Q8VHK7;M0R3J6	Hepatoma-derived growth factor	Hdgf	0.0396811	-0.194094	ns	0.0687233	-0.147591	ns
3374	F1LPG3;O88588;O88588-2;I6LL99	Phosphofurin acidic cluster sorting protein 1	Pacs1	0.0913511	-0.0322151	ns	0.0930763	0.0860475	ns
3375	F1LPG5;F1M7T1;Q2XTA8;D3ZV29;D3ZQH7;F1M7Z4		LOC688963;LOC100361934;Ndufb4;Ndufb4l1;RGD1560088;LOC687864	0.649133	-0.0224048	ns	0.0314449	-0.0437578	ns
3377	F1LPJ6;Q66H62	Ubiquitin carboxyl-terminal hydrolase CYLD	Cyld	0.651986	-0.148409	ns	0.340244	-0.0239333	ns
9	A0A096MIZ1;D4A4D8;A0A096MJ96;A0A096MK80		Palm2	0.0592972	-0.0338549	ns	1.24333e-05	-0.142311	FDR1%
3382	F1LPM3;O35413	Sorbin and SH3 domain-containing protein 2	Sorbs2	0.251258	0.0585906	ns	0.471957	-0.0485453	ns
4668	P11951;P11950;Q78EE8;Q9Z1G9	Cytochrome c oxidase subunit 6C-2;Cytochrome c oxidase subunit 6C-1	Cox6c2;Cox6c1;COVIc;Cox6c	9.01895e-05	-0.151258	FDR1%	0.000147738	-0.205012	FDR1%
3386	F1LPQ3;Q5M9I2;P21139	Alpha-mannosidase;Alpha-mannosidase 2C1	Man2c1	0.590084	0.00260449	ns	0.8954	0.0264161	ns
4677	P12839;G3V7S2	Neurofilament medium polypeptide	Nefm	5.38929e-17	-0.154746	FDR1%	1.31578e-31	-0.204169	FDR1%
3388	F1LPS8;P86252	Transcriptional activator protein Pur-alpha	Pura	0.630968	-0.0153485	ns	0.00703135	-0.106471	ns
3390	F1LPV0		Nars	0.00644758	0.166388	ns	0.824637	0.0503963	ns
816	D3ZCI0;A0A0G2KA23;A0A0G2K785;Q63060	Glycerol kinase	Gk	0.231908	-0.0286122	ns	0.000465785	-0.14133	FDR1%
3393	F1LQ09;Q562A0		Atl2	0.95562	0.0196617	ns	0.0823335	-0.166935	ns
3396	F1LQ48;B5DFG2;F2Z3R2;F1LQ48-2;Q9ET33		Hnrnpl	0.163328	-0.0271305	ns	0.0279216	-0.0371475	ns
340	A0A0G2JX25;Q5FVP6		Gmpr2	0.105329	0.0323505	ns	0.809967	-0.0443233	ns
3403	F1LQC1;P07872-2;P07872;F1M609	Acyl-coenzyme A oxidase;Peroxisomal acyl-coenzyme A oxidase 1;Peroxisomal acyl-CoA oxidase 1, A chain;Peroxisomal acyl-CoA oxidase 1, B chain;Peroxisomal acyl-CoA oxidase 1, C chain	Acox1	0.97427	0.0758308	ns	0.015296	-0.100726	ns
3408	F1LQF5;Q3KR85		Ubac2	0.973364	-0.000575121	ns	NA	NA	NA
3409	F1LQI1;O35952;O35952-2	Hydroxyacylglutathione hydrolase, mitochondrial	Hagh	0.563546	-0.0373701	ns	0.0622742	0.0637847	ns
5487	Q4FZT9	26S proteasome non-ATPase regulatory subunit 2	Psmd2	2.48936e-10	0.127873	FDR1%	0.792065	0.0308669	ns
3411	F1LQI6		Zer1	0.0967268	-0.073103	ns	0.73855	-0.0200182	ns
3414	F1LQN1;Q5BJS5	Polypeptide N-acetylgalactosaminyltransferase	Galnt16	NA	NA	NA	0.825179	0.00986177	ns
3415	F1LQN3;Q9JK11;Q5U1Z3	Reticulon;Reticulon-4	Rtn4	0.580983	0.00776282	ns	0.0116095	-0.0596735	ns
3416	F1LQP8;Q9JIW1		Cdh6	0.996309	0.00923847	ns	0.102779	0.0107954	ns
3417	F1LQP9;Q5D008		Tnpo1	0.0346906	0.0389474	ns	0.0330661	0.0921276	ns
2172	D3ZIE9		Aldh18a1	2.78132e-05	0.107221	FDR1%	0.00129781	-0.0865657	FDR1%
3424	F1LQY6		Necab2	0.00179404	-0.118329	ns	0.551059	0.0417785	ns
6098	Q5XID1	Anamorsin	Ciapin1	0.467047	0.0491124	ns	0.000107089	-0.140761	FDR1%
3427	F1LR10		Lima1	0.76913	0.124179	ns	0.538863	0.0234264	ns
3429	F1LR18;P18890	Rho GTPase-activating protein 39	Arhgap39	0.00201219	-0.21015	ns	0.943427	0.0796133	ns
3430	F1LR33;Q6W5G4	Lipid phosphate phosphatase-related protein type 2	Lppr2	0.268798	-0.239974	ns	0.136152	0.255769	ns
6072	Q5XI64	Monoacylglycerol lipase ABHD6	Abhd6	0.0360226	-0.0949098	ns	1.36956e-05	-0.140158	FDR1%
3433	F1LR60;O35430-2;O35430	Amyloid beta A4 precursor protein-binding family A member 1	Apba1	0.80612	-0.0117951	ns	0.0057034	-0.125734	ns
3435	F1LR71;A0A0G2JWF4;B1WC71		Aspscr1	0.771523	0.00744259	ns	0.139555	-0.0210393	ns
5062	P62483;A0A0G2K670	Voltage-gated potassium channel subunit beta-2	Kcnab2	0.000155194	-0.157667	FDR1%	7.3658e-07	-0.193325	FDR1%
3439	F1LRB8;P18298;Q6P688;F1LZ34;A0A0G2K248;P13444	S-adenosylmethionine synthase;S-adenosylmethionine synthase isoform type-2;S-adenosylmethionine synthase isoform type-1	LOC100363915;Mat2a;Mat1a	0.0014384	0.13307	ns	0.0360775	-0.0816237	ns
3441	F1LRE1;A0A0G2JU71;P70619	Glutathione reductase	Gsr	0.638852	0.00661624	ns	0.0232304	0.0509363	ns
3442	F1LRE5;A0A0G2K9H3;Q3KR91	Oxysterol-binding protein	Osbpl9	0.0368346	0.134438	ns	0.00313581	0.0837727	ns
3620	F1M0U5		Nbas	0.0664428	0.0658124	ns	0.000114561	-0.139992	FDR1%
4770	P21531;A0A0U1RRY5	60S ribosomal protein L3	Rpl3	8.58785e-09	0.127812	FDR1%	0.0176266	-0.093334	ns
2890	D4A4Z9		Ktn1	0.276319	-0.0112009	ns	2.29165e-08	-0.139326	FDR1%
3450	F1LRL4;B2GV11		Tbc1d9b	0.00705118	0.160301	ns	0.0262257	0.0716717	ns
3451	F1LRL9;P15205;B0BNK3	Microtubule-associated protein 1B;MAP1B heavy chain;MAP1 light chain LC1	Map1b;Mtap1b	0.26196	-0.0258032	ns	0.162184	0.050409	ns
3455	F1LRP7;Q9QZ81	Protein argonaute-2	Ago2	0.998926	0.00806793	ns	0.0828133	-0.041325	ns
3457	F1LRQ6		Cdc23	0.786441	0.0469386	ns	0.150756	0.119133	ns
3458	F1LRS2;A0A0G2K3H2;B2RZA1;Q45N69		Dock7	0.539535	0.0627039	ns	0.0771719	-0.101188	ns
3044	D4A962		Hnrnpul1	0.00022179	0.126234	FDR1%	0.0657274	0.0326159	ns
6684	Q6P9U8;D3ZL77	Eukaryotic translation initiation factor 3 subunit H	Eif3h	0.602614	-0.0110646	ns	4.69947e-06	-0.138175	FDR1%
3461	F1LRV4;O88600	Heat shock 70 kDa protein 4	Hspa4	0.780008	-0.0225504	ns	0.0094003	0.0299281	ns
5895	Q5PQN0	Neurocalcin-delta	Ncald	0.0197855	-0.112835	ns	0.000103987	-0.137101	FDR1%
3463	F1LRY5;Q64380	Sarcosine dehydrogenase, mitochondrial	Sardh	0.72011	-0.0166609	ns	NA	NA	NA
3464	F1LRY7;Q9JKA9	Potassium/sodium hyperpolarization-activated cyclic nucleotide-gated channel 2	Hcn2	0.236852	0.0158175	ns	0.104669	-0.192256	ns
4961	P52555	Endoplasmic reticulum resident protein 29	Erp29	0.059946	-0.0297653	ns	7.21512e-08	-0.136519	FDR1%
1425	B1WC34		Prkcsh	0.97518	-0.0192058	ns	0.000816688	-0.136444	FDR1%
3468	F1LRZ9;A1L117		Rundc3a	0.74443	0.0241194	ns	0.543179	-0.0144007	ns
3469	F1LS01;Q00A23		Pcdh9	0.918983	0.0562999	ns	0.114339	-0.0322496	ns
3922	G3V6I9;D4A1Z2;D4AE42;P12749;D3ZSF2	60S ribosomal protein L26	Rpl26;Rpl26-ps2;Rpl26-ps1;LOC688981	1.33944e-07	0.105374	FDR1%	7.72154e-05	-0.143912	FDR1%
3472	F1LSC3;F1LM37;O88629		Sf1	0.896296	-0.0143689	ns	0.353543	-0.00725201	ns
3473	F1LSC5;P36407-2;P36407;H9KVE7	E3 ubiquitin-protein ligase TRIM23	Trim23	0.788077	0.0178864	ns	0.00466253	0.0717802	ns
3475	F1LSD5;A0A0G2JXV6;Q9JLS3-2	Serine/threonine-protein kinase TAO2	Taok2	0.00257155	-0.198909	ns	0.308296	0.137751	ns
3478	F1LSG8;Q5BJX6;D3ZTE2		Ccdc132;LOC100911994	0.244844	-0.0506663	ns	0.890737	0.0437324	ns
6101	Q5XIE1	Protein THEM6	Them6	0.762364	-0.022054	ns	0.00195052	-0.135943	FDR1%
348	A0A0G2JX76;Q1AAU6;A0A0G2K451;Q1AAU6-2;A0A0G2JZQ0;Q1AAU6-3	Arf-GAP with SH3 domain, ANK repeat and PH domain-containing protein 1	Asap1	0.391015	-0.0410865	ns	0.567251	0.0428185	ns
3481	F1LSL2;P52590	Nuclear pore complex protein Nup107	Nup107	0.306302	0.0534727	ns	0.16483	0.0416231	ns
3483	F1LSM0	Ubiquitin carboxyl-terminal hydrolase	Usp24	0.437881	-0.038382	ns	0.934831	0.0148108	ns
3484	Q68G48;F1LSM6;Q6P9Y2;Q08603	Geranylgeranyl transferase type-2 subunit beta	Rabggtb	0.587628	0.0440462	ns	NA	NA	NA
3486	F1LSM8		Dock9	NA	NA	NA	0.545941	0.0450919	ns
3487	F1LSQ0;Q924K2	FAS-associated factor 1	Faf1	0.265415	0.0503356	ns	0.00566107	-0.108417	ns
3489	F1LSR8;Q8CFG5	Voltage-dependent calcium channel subunit alpha-2/delta-3;Voltage-dependent calcium channel subunit alpha-2-3;Voltage-dependent calcium channel subunit delta-3	Cacna2d3	0.560505	0.0124154	ns	0.087347	0.0113568	ns
3490	F1LST0		Heatr5b	0.534125	0.00813802	ns	0.307326	0.101263	ns
316	B4F7C9;A0A0G2JWH5		Stt3a	0.207834	0.0689714	ns	0.00111459	-0.135802	FDR1%
3498	F1LT36;P63326;D3ZH53;A0A0H2UI18;D3ZJY5;D3ZCN9	40S ribosomal protein S10	RGD1564698;Rps10;RGD1561871;LOC100360905;RGD1560073	0.374565	0.05659	ns	0.196006	-0.142641	ns
3499	F1LT41;Q9JI51	Vesicle transport through interaction with t-SNAREs homolog 1A	Vti1a	NA	NA	NA	0.08306	0.120029	ns
35	A0A096MJT6		RGD1307100	0.259691	-0.0404939	ns	NA	NA	NA
3500	F1LT49		Lrrc47	0.317143	0.0250849	ns	0.0177279	0.0726753	ns
3506	F1LTR1		Wdr26	0.848104	0.0400564	ns	0.418518	0.0277913	ns
5015	P60522;F1M1J6	Gamma-aminobutyric acid receptor-associated protein-like 2	Gabarapl2;RGD1562165	0.92523	-0.00583631	ns	0.000277722	-0.135783	FDR1%
3509	F1LTX8;Q6TXI6		Lpgat1;LOC317456	0.674782	-0.0499344	ns	0.790443	-0.0422263	ns
3514	F1LU48		Ergic1	0.0358971	0.0577167	ns	0.00532945	-0.115775	ns
3515	F1LU71		Auh	0.179531	-0.0251949	ns	0.00607851	-0.0554859	ns
3661	F1M3L7	Epidermal growth factor receptor kinase substrate 8	Eps8	0.271719	-0.0485922	ns	0.00167986	-0.135357	FDR1%
3519	F1LUC0		Sybu	0.0554315	-0.0835318	ns	0.00509386	0.159085	ns
1359	Q5XFV9;B0K038;Q6P3E1;P62250;M0R4I3;M0R8S7;A0A1W2Q631	40S ribosomal protein S16	Rps16;RGD1561137;LOC102548369	0.001911	0.0826107	ns	0.000409446	-0.135198	FDR1%
2015	D3ZDJ3		Elmod1	0.00151962	-0.171536	ns	0.00031483	-0.135097	FDR1%
83	A0A0A0MY09;Q66HD0;A0A0G2K4I4;Q66HD0-2	Endoplasmin	Hsp90b1	0.00690783	0.0691955	ns	1.85119e-08	-0.134498	FDR1%
3529	F1LV21		Ubash3b	0.803552	0.0430682	ns	0.295218	-0.0282192	ns
4840	P31662	Sodium-dependent neutral amino acid transporter SLC6A17	Slc6a17	1.41364e-06	0.124894	FDR1%	0.0188169	-0.0965125	ns
4732	P18418	Calreticulin	Calr	0.289774	-0.016869	ns	1.50794e-09	-0.133744	FDR1%
3540	F1LVR0		Iglon5	0.263057	0.014642	ns	0.108153	-0.0661307	ns
3380	F1LPK7;Q63598;Q562B2	Plastin-3	Pls3	0.574247	0.00161119	ns	2.28986e-08	-0.13372	FDR1%
3544	F1LVV4		Rcc2	0.00887289	0.124759	ns	0.851224	0.100651	ns
3545	F1LVX2		Ehbp1	0.522811	-0.048753	ns	0.0488256	0.162667	ns
3060	D4A9M6;O88884;F1LMK0;O88884-2	A-kinase anchor protein 1, mitochondrial	Akap1	0.0474095	-0.0573859	ns	0.000341541	-0.13307	FDR1%
6557	Q6AYT3	tRNA-splicing ligase RtcB homolog	Rtcb	0.000335797	0.124639	FDR1%	0.006082	-0.0806169	ns
3550	F1LW74		Iqgap2	0.64287	-0.0232151	ns	0.803678	-0.0170893	ns
3551	F1LW77		Rab33b	0.333717	0.000471337	ns	0.24226	0.0398284	ns
5089	P62909	40S ribosomal protein S3	Rps3	0.0222388	0.0975886	ns	0.000539972	-0.133027	FDR1%
5977	Q5U214		Snrpa	0.0393192	-0.0908414	ns	0.00154271	-0.132917	FDR1%
3556	F1LWG4		Ndufaf1	0.588193	-0.0282855	ns	0.215121	-0.0474997	ns
3557	F1LWK7;A0A0G2K7Z4		Ablim1	0.138803	-0.0330493	ns	0.338804	0.00560794	ns
497	A0A0G2K0B4;A0A0G2K8P3;Q62940	E3 ubiquitin-protein ligase NEDD4	Nedd4	0.000332618	0.124308	FDR1%	0.0163023	0.0270474	ns
3566	F1LX07;A0A0G2K2J7		Slc25a12	0.228647	-0.0392068	ns	0.0161249	-0.035655	ns
3570	F1LXA0		Ndufa12	0.662228	-0.0319905	ns	0.106889	-0.0447432	ns
3572	F1LXF1		Bcr	0.418224	0.0111194	ns	0.330494	-0.0407703	ns
5048	P62078	Mitochondrial import inner membrane translocase subunit Tim8 B	Timm8b	0.643752	0.0105381	ns	5.87092e-07	-0.132555	FDR1%
6139	Q5XIP0		Dnajb4	0.364128	-0.0298388	ns	0.00025848	-0.130694	FDR1%
3583	F1LY09		Actr3b	0.316856	-0.0455359	ns	0.712907	-0.0213625	ns
3586	F1LYA6;O35823		Abi2	0.278017	-0.0940643	ns	0.829732	-0.02529	ns
4790	P23978	Sodium- and chloride-dependent GABA transporter 1	Slc6a1	0.278883	-0.00888226	ns	2.97963e-05	-0.130518	FDR1%
3589	F1LYI5;P25886;A0A0G2QC62;M0R665;D3ZY63;D3Z8Q4;D4A888;F1LSZ1;D4A883;A0A0G2JT96;D3ZWV1	60S ribosomal protein L29	RGD1564138;Rpl29;LOC686807;RGD1566073;RGD1563300;RGD1563579;LOC100362277	0.285986	-0.0078764	ns	0.118667	-0.175728	ns
4555	P04785	Protein disulfide-isomerase	P4hb	0.541617	0.0327293	ns	6.7105e-17	-0.130475	FDR1%
3592	F1LYQ8	FERM, RhoGEF and pleckstrin domain-containing protein 1	Farp1	0.00742638	0.0524978	ns	0.126578	0.0543345	ns
3594	F1LYZ8		Ppp1r21	0.0898463	-0.049761	ns	0.0426106	-0.0848281	ns
3595	F1LZ38		Tenm4	0.921176	-0.0283698	ns	0.132732	0.0229464	ns
4014	G3V7J0;Q02253	Methylmalonate-semialdehyde dehydrogenase [acylating], mitochondrial	Aldh6a1	0.128707	-0.0296133	ns	1.3487e-11	-0.12971	FDR1%
3273	E9PTR4;A0A0G2JYC6;Q4V8A7		Ubap2l	0.116513	-0.0547344	ns	6.17772e-10	-0.128415	FDR1%
3603	F1LZV1		Kalrn	NA	NA	NA	0.610304	-0.0848406	ns
3604	F1LZW6		Slc25a13	0.515591	-0.0426589	ns	0.100134	-0.0331188	ns
6325	Q642E3;Q9JLH7;D4A1S2	CDK5 regulatory subunit-associated protein 3	Cdk5rap3;Prdm1	0.7362	-0.00853488	ns	0.000394878	-0.128388	FDR1%
3606	F1LZX9;A0A0G2JVZ6		Itgav	0.332777	-0.0252619	ns	0.406695	0.0210031	ns
361	F1M0N7;A0A0G2JXG7		Lrrc16a	NA	NA	NA	0.134389	-0.0113623	ns
3610	F1M062		Larp1	0.916093	-0.0100453	ns	0.0461081	-0.0749648	ns
3615	F1M0G0		Rgs17	0.768452	0.0670246	ns	0.217445	0.0703679	ns
3618	F1M0J7		Prickle2	0.00426471	-0.112724	ns	0.170853	0.0816256	ns
3619	F1M0N1	Non-specific protein-tyrosine kinase	Abl2	0.223104	-0.00576941	ns	0.21352	0.116431	ns
362	A0A0H2UHS3;A0A0G2JXH2;Q5PPN7	Coiled-coil domain-containing protein 51	Ccdc51	0.376575	-0.0450028	ns	0.965598	-0.00877587	ns
3646	F1M2K6		Pkp4	0.341173	-0.0513072	ns	2.49173e-05	-0.128387	FDR1%
3623	F1M0Z1;A0A1P0PBZ6		Trio	0.450256	0.0178922	ns	0.0833794	0.0831512	ns
4427	O35314	Secretogranin-1;PE-11;CCB peptide short form;CCB peptide long form	Chgb	2.22869e-06	-0.202075	FDR1%	3.27064e-24	0.735281	FDR1%
3626	Q700Q7;F1M110	Glycylpeptide N-tetradecanoyltransferase	Nmt2	0.0875809	0.0829428	ns	0.855791	0.058908	ns
3630	F1M1A6		LOC681355	0.0842263	0.0685516	ns	0.755112	-0.0911357	ns
3631	F1M1B3		RGD1564420	0.384664	0.0493858	ns	0.987253	0.0432603	ns
3633	F1M1D5		Tbcd	0.399228	0.069659	ns	0.863851	0.0378307	ns
3634	F1M1E4;A0A0G2K0Y5;D3ZXB0		Pnkd	0.468324	-0.0225121	ns	0.268302	0.00925124	ns
6082_m	Q5XI81;A0A0G2JWD2	Fragile X mental retardation syndrome-related protein 1	Fxr1	0.843644	0.0475678	ns	0.00112065	-0.128381	FDR1%
3641	F1M241;A0A0G2K6J1;B2GV78		Dennd1a	0.423345	0.0558737	ns	0.149946	0.0215697	ns
3643	F1M287		Srgap1	0.245221	-0.0294297	ns	NA	NA	NA
3644	F1M2D4		Arhgap23	0.80856	-0.00886351	ns	0.197079	0.0696375	ns
4585	P07483	Fatty acid-binding protein, heart	Fabp3	0.0157734	-0.0506126	ns	4.71973e-06	-0.127587	FDR1%
3648	F1M324	Phosphoinositide phospholipase C	Plcl2	0.881138	-0.0481961	ns	0.125955	0.0327278	ns
365	G3V9C7;G3V8B3;A0A0G2JXI9;M0R4L7;D3ZWM5;D3ZLY9;A0A0G2JXE0;D3ZNH4;Q00715;A0A0G2K7R1;Q9Z2R0;Q7M0A0	Histone H2B;Histone H2B type 1	Hist1h2bk;LOC100910200;Hist1h2bl;Hist1h2bb;Hist1h2bh;Hist1h2bo;Hist1h2bq;Hist1h2bcl1	0.930432	-0.0328593	ns	0.664258	0.0127614	ns
1503	B2RYA8;D4ABC2		Dnajb2	0.157635	-0.0208308	ns	7.81476e-05	-0.127311	FDR1%
3655	F1M3D2;M0RDT6		Dmwd	0.722794	-0.0145943	ns	0.235373	0.132013	ns
3659	F1M3H8		Hnrnpa0	0.934993	-0.0251621	ns	0.960372	0.00451329	ns
4250	M0R5H1		Etl4	0.213071	-0.0598794	ns	0.000233073	-0.126691	FDR1%
2634	D3ZXY2		Pdzd8	0.844682	0.0379069	ns	8.29307e-05	-0.126173	FDR1%
3662	F1M3P6		Scai	0.275865	-0.0578855	ns	0.463326	0.0313123	ns
4932	P49620	Diacylglycerol kinase gamma	Dgkg	1.62403e-07	-0.196978	FDR1%	1.45233e-09	0.229605	FDR1%
3665	F1M400		Ankrd28	0.173544	0.0940348	ns	0.983563	0.00425669	ns
3666	F1M403		Ube2o	0.034885	0.0432705	ns	0.435647	0.0464017	ns
5393	Q3KR55;Q7TP17	Splicing factor U2AF 26 kDa subunit	U2af1;U2af1l4	0.000698561	0.124025	FDR1%	0.926063	0.0131971	ns
4663	P11654	Nuclear pore membrane glycoprotein 210	Nup210	0.0006014	0.123796	FDR1%	0.632535	-0.0141039	ns
3989	Q9Z1X8;G3V774		Fbxo2	0.939732	-0.0108411	ns	0.00173189	-0.125211	FDR1%
3671	F1M4B6		RGD1563349	0.0052445	0.0980093	ns	0.326684	-0.0959167	ns
6350	Q66H12	Alpha-N-acetylgalactosaminidase	Naga	0.000403806	0.123729	FDR1%	0.00264679	0.108918	ns
1057	A0A0H2UHS7;P12001;Q0QEW8	60S ribosomal protein L18	Rpl18	0.00826125	0.0822768	ns	0.000195639	-0.124805	FDR1%
1544	B2RYN3		Eef1e1	0.259692	0.144597	ns	0.000303941	-0.124671	FDR1%
3678	F1M4N6		Dock3	0.355848	-0.025894	ns	0.0706544	-0.139045	ns
368	A0A0G2JXK7;Q68FS3	F-box only protein 7	Fbxo7	0.645418	-0.0335488	ns	0.00460846	0.0600754	ns
3680	F1M4R7;Q9ERQ6;Q9ERQ6-2	Chondroitin sulfate proteoglycan 5	Cspg5	0.00757485	-0.149283	ns	0.00594827	-0.091439	ns
3681	F1M4U0		Ccnyl1	0.683972	-0.0115924	ns	NA	NA	NA
4042	G3V7T8;P97838-2;P97838	Disks large-associated protein 3	Dlgap3	2.23164e-06	-0.193129	FDR1%	2.0657e-07	0.23974	FDR1%
369	A0A0G2JXM6;G3V8X1;Q6AXT7	RNA-binding protein 42	Rbm42	0.114788	0.0883224	ns	0.49481	-0.0606774	ns
3690	F1M5V2		Glipr2	0.302508	0.0985225	ns	0.546146	0.0160326	ns
3692	F1M625;A0A0G2K2V1	Ubiquitin carboxyl-terminal hydrolase	Usp46	0.591565	-0.0237241	ns	0.593317	0.0178353	ns
3697	F1M6C4;M0RB29		Arl15	0.562449	-0.00626616	ns	0.0540987	0.229391	ns
3698	F1M6D0		Mrps6	0.297725	-0.0108559	ns	0.00379709	-0.158834	ns
3699	F1M6E5;Q5BJV5		Nacad	0.401752	-0.0100885	ns	NA	NA	NA
3700	F1M6I9		Celf4	0.338323	-0.0713624	ns	0.101374	-0.0703577	ns
3779	F1M9Q8;Q9EQR2;Q9WUW6	Alkyldihydroxyacetonephosphate synthase, peroxisomal	Agps	3.03868e-05	0.13552	FDR1%	2.82839e-05	0.109804	FDR1%
3703	F1M6T6;A0A0G2JV49		Ppp6r2	0.0621655	-0.0607302	ns	0.6642	-0.0570428	ns
3706	F1M6V8;B5DF70;A0A0G2JX43		Strn4	0.129183	-0.0685105	ns	0.782752	-0.0258001	ns
3707	F1M6W2;Q6UPR8	Endoplasmic reticulum metallopeptidase 1	Ermp1	0.239677	0.0160451	ns	0.00765402	-0.0390246	ns
1122	A0A140TAF7;G3V9D0;Q5BJN4	Protein O-glucosyltransferase 1	Poglut1	0.408787	0.00257839	ns	0.000211408	-0.123342	FDR1%
3711	F1M775		Diaph1	NA	NA	NA	0.00546593	0.187593	ns
4648	P10860;Q7TPI5	Glutamate dehydrogenase 1, mitochondrial	Glud1	0.00232277	-0.042544	ns	4.28014e-09	-0.123266	FDR1%
3713	F1M787;O35116	Catenin delta-2	Ctnnd2	0.34468	-0.0591116	ns	0.89728	-0.0226941	ns
3714	F1M790;Q62786	Prostaglandin F2 receptor negative regulator	Ptgfrn	0.229705	0.0836861	ns	NA	NA	NA
3716	F1M7B8;A0A0G2JTH7		Ube3a	0.0222493	0.118004	ns	0.617751	-0.00362146	ns
3717	F1M7K7;Q8VHW5	Voltage-dependent calcium channel gamma subunit;Voltage-dependent calcium channel gamma-8 subunit	Cacng8	0.222949	-0.105748	ns	0.117956	0.0592581	ns
3367	F1LPB9;P47709;A0A0G2K8B5;P70610	Rabphilin-3A;Double C2-like domain-containing protein beta	Rph3a;Doc2b	0.0249927	-0.056077	ns	1.65428e-12	-0.122874	FDR1%
3722	F1M7Q5;O09178	AMP deaminase 3	Ampd3	0.00825265	0.169585	ns	NA	NA	NA
3723	F1M7Q7;Q498M3;Q5XI11		Otud4	NA	NA	NA	0.199271	0.160704	ns
3724	F1M7S2;Q5XIU5	Proteasome inhibitor PI31 subunit	Psmf1	0.8769	0.0203293	ns	0.0935241	0.17315	ns
2710	D4A017		Tmem87a	0.000199524	0.123314	FDR1%	0.992623	-0.0590059	ns
3355	F1LP01;P49621	Diacylglycerol kinase;Diacylglycerol kinase beta	Dgkb	1.03375e-06	-0.114714	FDR1%	8.48351e-14	-0.188308	FDR1%
1515	B2RYF6		Clptm1	0.776406	0.00263198	ns	0.0016458	-0.121672	FDR1%
3731	F1M7Y5;Q9R1X8	Protein kinase C iota type	Prkci	0.25516	-0.0155851	ns	0.406564	-0.0489417	ns
3734	F1M801		Anapc1	0.124785	0.00581963	ns	0.00567338	0.102583	ns
3737	F1M836;A0A0G2JU56;Q8VHF0;A0A1B0GWN5	MAP/microtubule affinity-regulating kinase 3	Mark3	0.745756	-0.0142042	ns	0.746645	-0.0478939	ns
4960	P52481	Adenylyl cyclase-associated protein 2	Cap2	2.28629e-12	-0.151019	FDR1%	3.27605e-23	-0.182444	FDR1%
6130	Q5XIK2	Thioredoxin-related transmembrane protein 2	Tmx2	0.858631	0.00959965	ns	0.000732832	-0.121462	FDR1%
374	A0A0G2JXT6;D3ZC22		Mtmr6	0.514674	-0.0496577	ns	0.0050631	0.19485	ns
3740	F1M863;Q91Z80;Q562A3	Liprin-alpha-4	Ppfia4	0.0283392	-0.181641	ns	0.697634	-0.0661949	ns
3741	F1M888;P83900	Rap guanine nucleotide exchange factor 5	Rapgef5	0.03676	-0.134504	ns	0.0795758	-0.033482	ns
3742	F1M8A4		Ppfia2	0.0183995	-0.0653976	ns	0.0572131	-0.0594581	ns
3746	F1M8G8;Q5JCS6	Signal-induced proliferation-associated 1-like protein 2	Sipa1l2	0.00377811	0.106081	ns	0.520344	-0.0316963	ns
3747	F1M8H2		Wars2	0.183516	-0.0483589	ns	0.799103	-0.0202104	ns
3748	F1M8H6;Q3MID5;Q5I6B8	Phosphatidylinositol 4-phosphate 5-kinase type-1 gamma	Pip5k1c	0.00113674	-0.0925964	ns	0.467786	-0.0162191	ns
375	D4A8D5;A0A0G2JXT8		Flnb	0.0598008	0.112169	ns	0.282748	-0.055723	ns
355	A0A0G2JXD0;Q6P9U5;P17077;A0A0G2JX41;F1M7A9;M0R6B4	60S ribosomal protein L9	Rpl9;RGD1561928;LOC100910002	2.47073e-08	0.119697	FDR1%	0.0384382	-0.0794088	ns
3753	F1M8P2		Zyg11b	NA	NA	NA	0.605179	0.0394372	ns
3756	F1M8V2		Ube4b	0.10738	0.105308	ns	0.0362367	0.0922239	ns
2364	D3ZQ59;P47245-2;G3V700;P47245	Nardilysin	Nrd1	0.920964	0.0165018	ns	2.01328e-05	-0.121336	FDR1%
3761	F1M951;O88902	Protein-tyrosine-phosphatase;Tyrosine-protein phosphatase non-receptor type 23	Ptpn23	0.451689	0.0177915	ns	0.286253	0.0350087	ns
768	A0A0G2K6D5;D3ZUF9		Pitrm1	0.0983263	-0.0331836	ns	8.85244e-05	-0.120748	FDR1%
4384	O08557	N(G),N(G)-dimethylarginine dimethylaminohydrolase 1	Ddah1	0.632086	-0.00766512	ns	1.0111e-08	-0.119988	FDR1%
3765	Q6TUE4;F1M994		Scaf4	0.636517	-0.024529	ns	0.158696	-0.0672354	ns
3767	F1M9A7;Q63448	Acyl-coenzyme A oxidase;Peroxisomal acyl-coenzyme A oxidase 3	Acox3	0.355222	0.0297769	ns	0.0192551	0.102878	ns
3769	F1M9C9;Q5EB72		Hars2	0.766354	-0.0121348	ns	0.182175	-0.0570895	ns
3771	F1M9D6;Q6P6Q7;Q9QXK0;A0A0G2JX93;Q7TP57;O70406	Signal transducer and activator of transcription	Stat1;Stat4;Stat-1	0.7145	0.0204712	ns	0.541176	0.0350437	ns
3652	F1M392		Limch1	0.0298697	-0.103712	ns	1.39525e-06	-0.119369	FDR1%
3775	F1M9G8;Q8K3P7;A0A0G2K7W8	Histidine triad nucleotide-binding protein 3	Hint3	0.227306	-0.0237764	ns	0.0547022	0.0796316	ns
3776	F1M9N5;Q7TP51;Q6P7A2	Ubiquitin conjugation factor E4 A	Ube4a	0.0820616	-0.00297254	ns	0.698962	0.0041972	ns
3777	F1M9N7;Q4KLH5	Arf-GAP domain and FG repeat-containing protein 1	Agfg1	0.292999	0.0243614	ns	0.179905	0.0265878	ns
1979	D3ZCG3;D3ZKH2		Mon2	9.34802e-05	0.134027	FDR1%	0.000800052	0.10312	FDR1%
2075	D3ZF97		Erlec1	0.20523	0.033913	ns	0.000182787	-0.118955	FDR1%
3782	F1M9W9;B2GV66		Trappc8;RGD1309102	0.241582	0.0816038	ns	0.156656	0.0513509	ns
4745_m	P19490;P19490-2	Glutamate receptor 1	Gria1	0.000244897	-0.187984	FDR1%	0.000193511	0.178315	FDR1%
4680	P13084;P13084-2;D3ZXI2;D3ZP59	Nucleophosmin	Npm1	1.02568e-07	0.119487	FDR1%	0.00561731	0.0677848	ns
1205	A2RRU1	Glycogen [starch] synthase, muscle	Gys1	0.453627	0.00356323	ns	9.71106e-05	-0.118694	FDR1%
379	A0A0G2JXY6;Q9QXU3;Q00954	Sodium channel subunit beta-1	Scn1b	0.173284	-0.0834105	ns	NA	NA	NA
3790	F1MA52;O88984	Nuclear RNA export factor 1	Nxf1	0.646918	0.0150282	ns	0.285963	0.111686	ns
3793	F1MA79;A0A0G2KA49;Q9WVC1	Slit homolog 2 protein	Slit2	0.167386	-0.0236605	ns	0.0619847	-0.0669587	ns
3795	F1MA89		Ccny	0.897005	-0.0436258	ns	0.00378952	0.113036	ns
1288	B0BN93	26S proteasome non-ATPase regulatory subunit 13	Psmd13	1.67133e-09	0.119001	FDR1%	0.168746	0.0498079	ns
3797	F1MA98	Nucleoprotein TPR	Tpr	0.571501	0.0183612	ns	0.943589	0.0312553	ns
3798	G3V8Z9;F1MAA2;Q1JU69		Cops7a	0.713124	-0.0144172	ns	0.00312591	0.10822	ns
4409	O35049;D4A8L3	Sphingomyelin phosphodiesterase 3	Smpd3	0.91111	-0.0238764	ns	3.91608e-05	-0.118156	FDR1%
3800	F1MAA5;Q66H32		Rangap1	0.200322	0.0462287	ns	0.0406996	-0.072593	ns
3802	Q810C5;F1MAB7;Q810C4;Q810C3;A0A0G2K3J7	Diacylglycerol kinase	Dgki;rDGKi-2;rDGKi-3	0.801381	0.0122992	ns	0.1192	-0.0998126	ns
3804	F1MAF8;Q5EBA2		Atg2b	0.405332	-0.0557498	ns	0.0767845	0.0523189	ns
3807	F1MAH8;Q9JK25;A0A0G2K681;Q4V8P6;A0A0G2JTX8;Q5G6W1		Clip1;Rsn	0.223154	-0.0501012	ns	0.375454	0.0355587	ns
3809	F1MAK3;B5DEI5		Arhgap32;Rics	0.388189	-0.0440305	ns	0.185431	0.0227881	ns
381	A0A0G2JXZ3;D3ZZM6		Atrx	0.68422	0.0512256	ns	0.304214	0.0681967	ns
3810	F1MAK9;Q5U2Q9		Smpd4	0.095934	0.143441	ns	NA	NA	NA
3816	F1MAP4		Megf10	0.0956059	0.275539	ns	NA	NA	NA
3817	F1MAQ4;B5DEN0		Trappc10	0.378101	-0.0400741	ns	0.461145	-0.0387751	ns
6200	Q62888;F1LQ41;A0A0U1RRX0;Q62888-2	Neuroligin-2	Nlgn2	0.05239	-0.10363	ns	0.00108531	-0.118128	FDR1%
3819	F1MAR6;A0A0G2K2S1;B4F7D0		Prodh	0.249814	-0.0837395	ns	0.498291	0.0557419	ns
6004	Q5U2U7	mRNA cap guanine-N7 methyltransferase	Rnmt	9.61252e-06	0.118826	FDR1%	0.522151	-0.0841158	ns
3821	F1SW39;Q812D1	PC4 and SFRS1-interacting protein	Psip1	0.957937	-0.00309183	ns	0.596149	-0.00709895	ns
3823	F2W8B0;P22734-2;P22734	Catechol O-methyltransferase	Comt	0.724185	0.024238	ns	0.00809846	0.0729173	ns
6309	Q641Y8;Q9JIJ7	ATP-dependent RNA helicase DDX1	Ddx1	7.66759e-06	0.114934	FDR1%	0.00293145	-0.0550289	ns
4164	G3V963;Q80WF4	Transmembrane protein 132A	Tmem132a	0.469747	-0.0338357	ns	0.0011169	-0.117608	FDR1%
3828	F2Z3T0;Q4V8C8	Parafibromin	Cdc73	0.119752	0.00120821	ns	NA	NA	NA
4527	O89035		Slc25a10	0.0353687	-0.0579351	ns	0.000140417	-0.1176	FDR1%
3832	F2Z3T9;Q5EB64		U2af2	0.758516	0.0311545	ns	0.0159375	-0.0532454	ns
3834	Q6MG10;F6Q5K7;A0A0G2JXL3;A0A0G2JUQ9		Mrps18b	0.322876	-0.00551019	ns	0.555301	-0.108615	ns
3837	F7EMB2;Q6QI16		RGD1304704	0.132213	0.0921073	ns	0.0412596	-0.120593	ns
4653	P11240	Cytochrome c oxidase subunit 5A, mitochondrial	Cox5a	2.14013e-05	-0.091919	FDR1%	9.76912e-10	-0.179164	FDR1%
3839	F7EPH4;Q499R7;A0A0G2JUD2		Ppa1	0.0652605	0.0783925	ns	0.525721	-0.0114479	ns
384	A0A0G2JY08			0.0588175	-0.0859663	ns	0.566188	0.0570663	ns
5575	Q4V7D1;A0A0G2K075;A0A0G2JX79;A0A0G2JXS8;Q7TPJ0	Translocon-associated protein subunit alpha	Ssr1	0.994123	0.125707	ns	0.00207189	-0.117592	FDR1%
3843	Q4KM69;F7EUU4		Cops5	0.410614	0.018769	ns	0.00793067	0.081148	ns
3845	Q7TQ25;Q7TNM3;F7EYB9		Omg	0.126666	0.0838753	ns	0.429606	-0.020191	ns
3847	Q5U2T0;F7EZZ0;A0A0G2K264		Dap3	0.884458	0.00826204	ns	0.101764	-0.0599416	ns
3849	F7F1Y3;Q793F9;Q6IRG3	Vacuolar protein sorting-associated protein 4A	Vps4a	0.311491	0.10452	ns	0.00562338	0.092228	ns
3850	F7F2F3;B4F772		Hspa4l	0.101155	0.0261999	ns	0.0500821	-0.067035	ns
3851	F7F350;Q6AYB6		Syap1	0.737086	-0.0421613	ns	0.743777	-0.0155028	ns
1040	A0A0H2UHM5;P11598	Protein disulfide-isomerase A3	Pdia3	0.373095	0.0173127	ns	2.65374e-11	-0.117536	FDR1%
3853	F7F3Z1		Lman2l	0.314938	0.0898413	ns	0.136591	0.0421343	ns
3858	Q68FQ5;F7FDM3		Mtif2	0.169192	-0.0746516	ns	0.024609	-0.0923022	ns
3859	F7FF45		Numa1	0.983652	0.00296136	ns	0.353437	-0.120867	ns
3860	Q6IRL2;F7FHF7;Q8R500	Mitofusin-2	LOC100911485;Mfn2	0.480185	-0.0404942	ns	0.465953	-0.0190696	ns
4023	G3V7L6;Q63347	26S protease regulatory subunit 7	Psmc2	3.72033e-06	0.114817	FDR1%	0.54655	0.023805	ns
3869	F8V328;P35280;Q5M970;A0A0G2K553	Ras-related protein Rab-8A	Rab8a	0.925343	-0.00692842	ns	0.301736	0.0404751	ns
387	A0A0G2JY22			0.859151	0.0423709	ns	0.0058841	-0.0364934	ns
3872	F8WFH8;Q6P7B0;A0A0G2K673	Tryptophan--tRNA ligase, cytoplasmic;T1-TrpRS;T2-TrpRS	Wars	0.246803	0.0282136	ns	0.0926219	0.0673065	ns
3873	F8WFM2;P85969	Beta-soluble NSF attachment protein	Napb	0.243918	-0.0127528	ns	0.933714	-0.00100101	ns
3874	F8WFS9;Q05764;Q05764-2	Beta-adducin	Add2	0.0767563	-0.0705518	ns	0.833869	-0.00511427	ns
6986	Q9EPH8;A0A0G2JZS2;D4A5H0	Polyadenylate-binding protein 1	Pabpc1;Pabpc5	0.325355	-0.0326049	ns	0.00136891	-0.117002	FDR1%
3879	G3V614;Q4G074	KIF1-binding protein	LOC606294;Kbp	NA	NA	NA	0.25663	0.0294481	ns
388	A0A0G2JY26;D4A0I5		Dnajc6	0.0449216	-0.0451079	ns	0.238743	0.0725261	ns
3881	G3V624;B2RYG0	Coronin	Coro1c	0.469835	-0.0101009	ns	0.615989	0.000432574	ns
3883	G3V631;B5DEJ8		Rabgef1	0.150916	0.0156393	ns	0.479875	-0.0303695	ns
4731	P18395	Cold shock domain-containing protein E1	Csde1	0.00404466	0.0481264	ns	1.25566e-05	-0.116747	FDR1%
3886	G3V644;O54755		Ndufv3;Ndufv3-ps1	0.656571	0.000332385	ns	0.336638	-0.0387034	ns
389	G3V9W6;A0A0G2JY43;P30839	Aldehyde dehydrogenase;Fatty aldehyde dehydrogenase	Aldh3a2	0.513299	0.044427	ns	0.0426828	0.0608281	ns
3890	G3V661;Q2V6G6		Baz1b	0.448964	0.138372	ns	0.0282467	0.130599	ns
3891	G3V662;P49791;Q5XFX2	Nuclear pore complex protein Nup153	Nup153	0.591793	0.0321337	ns	0.522605	-0.0193144	ns
4221	I6LBX8;A0A0G2K9D7		Pcdhgc3	0.492702	0.0495091	ns	0.000790131	-0.116418	FDR1%
3897	G3V679		Tfrc	0.00247652	0.207528	ns	0.00856309	-0.166822	ns
39	A0A096MJY1		Gpc6	0.50212	0.0588211	ns	0.484428	-0.0800509	ns
3906	G3V6C9;O54874;A0A0G2K5Z1	Non-specific serine/threonine protein kinase;Serine/threonine-protein kinase MRCK alpha	Cdc42bpa	0.268242	0.0103872	ns	0.743103	-0.0144469	ns
2821	D4A3C2		RGD1304884	0.0125377	0.0671057	ns	0.00124719	-0.115851	FDR1%
3908	G3V6D9;Q920G2	Na(+)/H(+) exchange regulatory cofactor NHE-RF;Na(+)/H(+) exchange regulatory cofactor NHE-RF2	Slc9a3r2	0.0434486	-0.188095	ns	0.115035	-0.080263	ns
2370	D3ZQD3		Ogdhl	0.927542	-0.00961066	ns	2.19782e-05	-0.115444	FDR1%
391	F1MAJ0;B2B9B0;A0A0G2JY48	Receptor protein-tyrosine kinase	Ephb2	0.0607499	-0.0526315	ns	0.18139	-0.0557982	ns
3910	G3V6F5;Q8CGS5	Zinc phosphodiesterase ELAC protein 2	Elac2	0.434896	0.0158803	ns	0.371601	-0.0409183	ns
3913	G3V6G7;Q562B9;B1H2A4		Pnpt1	0.09773	-0.0178706	ns	0.0128566	-0.0737798	ns
3914	G3V6H2;Q4FZS3		Prpf8	0.0144799	0.0758318	ns	0.544127	-0.00397698	ns
3915	G3V6H5		Slc25a11	0.00683737	-0.0487031	ns	0.0645427	-0.0188978	ns
3917	Q6P769;G3V6H9;Q9Z2G8	Nucleosome assembly protein 1-like 1	Nap1l1	0.455806	0.0207366	ns	0.531395	0.0100996	ns
3918	G3V6I1;Q8K4K5	Lethal(2) giant larvae protein homolog 1	Llgl1	0.0323359	0.118331	ns	0.153879	0.0746428	ns
392	D3ZV33;A0A0G2JY58		Pogz	0.514812	0.0286272	ns	0.191175	0.0199096	ns
3921	G3V6I8;O08812	Cationic amino acid transporter 3	Slc7a3	0.2438	0.0194609	ns	NA	NA	NA
5070	P62718;F1M0K6	60S ribosomal protein L18a	Rpl18a;RGD1565566	1.97556e-06	0.104701	FDR1%	0.0014628	-0.156482	FDR1%
3928	G3V6L4;A0A0G2K070	Kinesin-like protein	Kif5c	0.189184	-0.0137411	ns	0.00650256	-0.0738575	ns
3932	G3V6M3;P29101	Synaptotagmin-2	Syt2	0.00301868	-0.149106	ns	0.0053741	-0.162985	ns
3933	G3V6M8;B1WBY6		Nup37	0.220148	-0.0405619	ns	0.435366	-0.0485463	ns
3935	G3V6N7;A0A0G2K6T0;Q6T7Y2;Q6T7Y3;Q6TUA4;Q6T7Y4		Slc12a6	0.746358	0.109354	ns	0.500207	-0.149705	ns
3936	G3V6P2;Q01205;Q8CJG5;D0VYQ0	Dihydrolipoyllysine-residue succinyltransferase component of 2-oxoglutarate dehydrogenase complex, mitochondrial	Dlst;DLST	0.658343	-0.0122609	ns	0.417393	-0.0178387	ns
3818	F1MAQ7;E9PTE1;Q6PDU3		Son	0.228438	-0.0344961	ns	9.41035e-05	-0.114222	FDR1%
3940	G3V6P8;Q45QK0;O35359	Guanine nucleotide-binding protein subunit gamma	Gng12	0.825812	0.00773258	ns	0.634843	-0.0573124	ns
3941	G3V6Q2;Q10836	Thyrotropin-releasing hormone-degrading ectoenzyme	Trhde	0.0881715	0.129589	ns	0.317788	-0.020662	ns
5675	Q58FK9;F1M572	Kynurenine--oxoglutarate transaminase 3	Ccbl2	0.07503	-0.0563924	ns	1.71791e-07	-0.114026	FDR1%
2000	D3ZD11		Spcs2	0.0010671	0.113949	FDR1%	0.491616	0.00759385	ns
3944	G3V6R5;Q07116	Sulfite oxidase, mitochondrial	Suox	0.0485195	-0.0828481	ns	0.0104757	-0.0823768	ns
3945	G3V6R7;Q5EB57	3-oxoacyl-[acyl-carrier-protein] synthase, mitochondrial	Oxsm	0.706484	-0.0277007	ns	0.189034	0.010478	ns
3947	G3V6S2	Aconitate hydratase	Aco1	0.102106	0.0654162	ns	0.00303772	0.115826	ns
81	A0A0A0MY00;P70584	Short/branched chain specific acyl-CoA dehydrogenase, mitochondrial	Acadsb	0.330453	-0.049298	ns	0.000256041	-0.113817	FDR1%
3949	G3V6S8	Serine/arginine-rich splicing factor 6	Srsf6	0.0126882	0.280028	ns	0.427176	-0.0107786	ns
395	A0A0G2JY69;G3V907		LOC100911356	0.0312988	-0.0721218	ns	0.917135	0.0709227	ns
6543	Q6AYN4;Q6AYN4-2	Phytanoyl-CoA hydroxylase-interacting protein-like	Phyhipl	3.70367e-05	0.103901	FDR1%	1.65486e-07	-0.160149	FDR1%
3953	G3V6U3;Q3B8P6		Alg2	0.392236	0.0153414	ns	0.0259173	-0.0890951	ns
6053	Q5XI17		Tarsl2	0.560611	0.0330109	ns	0.0013838	-0.113684	FDR1%
3955	G3V6U9;D4A7S1;Q5FWY6		LOC100910833;Setd3	0.494146	0.14831	ns	NA	NA	NA
1030	A0A0H2UHH9;D4ACJ1;P62850-2;P62850-3;P62850;D3ZFZ8	40S ribosomal protein S24	LOC100363469;Rps24;LOC100912267	0.00112664	0.0632034	ns	0.000367442	-0.11368	FDR1%
3957	G3V6W2;Q9WTV0	Prolactin regulatory element-binding protein	Preb	0.286582	0.0166813	ns	0.0447957	-0.0309505	ns
1237	A9CMB7;P15178	Aspartate--tRNA ligase, cytoplasmic	Dars	1.73637e-07	0.113919	FDR1%	0.0151068	-0.0659505	ns
2665	M0RAK4;D3ZYW7;A0A0A0MXX7	Frataxin, mitochondrial;Frataxin intermediate form;Frataxin mature form	Fxn	0.807139	-0.047727	ns	9.88088e-05	-0.11337	FDR1%
3963	G3V6Y6	Alpha-1,4 glucan phosphorylase	Pygb	0.829124	0.00519667	ns	0.608958	0.0905186	ns
3964	G3V6Y9;O55035	Peptidyl-prolyl cis-trans isomerase G	Ppig	0.223562	0.0828078	ns	0.174056	-0.0532816	ns
1350	B0K020	CDGSH iron-sulfur domain-containing protein 1	Cisd1	0.00311714	-0.0756842	ns	4.73604e-06	-0.112988	FDR1%
6134	Q5XIM7	Lysine--tRNA ligase	Kars	0.770713	0.0253276	ns	2.75499e-05	-0.112094	FDR1%
3968	G3V702;Q99M63	WD40 repeat-containing protein SMU1;WD40 repeat-containing protein SMU1, N-terminally processed	Smu1	0.957215	-0.00194838	ns	0.00344043	-0.033884	ns
3676	F1M4J1		LOC100294508	0.763252	-0.0106133	ns	0.000871031	-0.110987	FDR1%
2852	D4A3X6	Phospholipid-transporting ATPase	Atp8a2	0.00296984	0.15239	ns	0.000107013	-0.110282	FDR1%
3979	Q5EBA4;G3V728		Nipsnap1	0.0282113	-0.0474392	ns	0.109202	-0.0255022	ns
3980	G3V733;Q63537	Synapsin-2	Syn2	0.457798	-0.159318	ns	0.184347	0.16752	ns
3981	G3V734;Q64591	2,4-dienoyl-CoA reductase, mitochondrial	Decr1	0.162972	0.0567387	ns	0.0346114	-0.126742	ns
4434	O35509;A0A0G2JZR4	Ras-related protein Rab-11B	Rab11b	0.650049	0.0164477	ns	3.02163e-06	-0.110222	FDR1%
3059	D4A9L2		Srsf1	1.07659e-05	0.112848	FDR1%	0.148705	0.0266969	ns
5217	P97610	Synaptotagmin-12	Syt12	0.00526642	-0.151785	ns	0.000750112	-0.109913	FDR1%
3988	G3V762;B0BNN0		Tsta3	0.498823	0.0594002	ns	0.114122	0.107769	ns
1916	D3ZAN3		Ganab	0.700439	-0.00436994	ns	0.00012293	-0.109905	FDR1%
399	A0A0G2JYA2;Q9JHU5	Arfaptin-1	Arfip1	0.906066	0.0315299	ns	0.0823485	0.0912644	ns
3990	G3V781;Q9JIM0	Double-strand break repair protein MRE11A	Mre11a	0.0392357	0.0830934	ns	0.269174	0.0281924	ns
6643	Q6P3V8		Eif4a1	4.59483e-05	0.110989	FDR1%	0.593303	-0.0082523	ns
5052	P62193	26S protease regulatory subunit 4	Psmc1	2.86542e-07	0.110957	FDR1%	0.419936	0.0170046	ns
2724	D4A0C3		Hid1	0.338187	0.0771991	ns	0.000949216	-0.109069	FDR1%
3994	G3V798;B1H240		Srsf4	0.0114318	0.0845235	ns	0.790142	-0.0328972	ns
3995	G3V7A5;P35952	Low-density lipoprotein receptor	Ldlr	0.328763	-0.063597	ns	NA	NA	NA
5269	Q04462;Q4FZR0;A0A0G2JVG2	Valine--tRNA ligase	Vars	0.000172403	0.110596	FDR1%	0.544908	-0.00298109	ns
3997	Q6AYZ7;G3V7B5;Q63468	Phosphoribosyl pyrophosphate synthase-associated protein 1	Prpsap1	0.511311	0.0113686	ns	0.0469621	0.0542057	ns
3998	G3V7D4;A5HTT2		Efnb3	0.00538068	-0.125341	ns	0.912005	0.00457134	ns
40	A0A096MJY6		Gbe1	0.305859	0.129967	ns	0.589999	0.0376595	ns
4000	G3V7F1;Q9Z2K5	Target of rapamycin complex subunit LST8	Mlst8	0.665562	-0.0163911	ns	0.00846882	0.0953153	ns
4002	G3V7F6;Q3MHS8		RGD1561590;Sap18	0.316661	0.0704134	ns	0.644729	0.0616946	ns
4446	O35821	Myb-binding protein 1A	Mybbp1a	3.208e-05	0.108971	FDR1%	0.0486188	0.036415	ns
6305	Q641Y0	Dolichyl-diphosphooligosaccharide--protein glycosyltransferase 48 kDa subunit	Ddost	6.74521e-07	0.107014	FDR1%	0.00310331	-0.0860315	ns
5241	Q00657;F1LS79	Chondroitin sulfate proteoglycan 4	Cspg4	0.0811208	-0.102091	ns	0.000933125	-0.108851	FDR1%
4006	M0R8T0;G3V7H2;O35217	Multiple inositol polyphosphate phosphatase 1	RGD1564801;Minpp1	0.150045	-0.0778266	ns	0.165012	-0.064482	ns
4008	G3V7H6;O08701	Arginase;Arginase-2, mitochondrial	Arg2	0.306695	0.029331	ns	0.694466	0.0427416	ns
4009	G3V7I0;Q9Z0V6	Thioredoxin-dependent peroxide reductase, mitochondrial	Prdx3	0.152191	-0.0448267	ns	0.599784	-0.0114176	ns
1103	O55215;O55211;A0A0U1RVI9;P27952;O55212;D3ZIY7;E9PT76;D3ZQW7;M0RAJ8;O55214;A0A0G2KB28;D3ZT78	40S ribosomal protein S2	Rps2-ps6;Rps2;LOC100359960;Gm8225	0.000102724	0.106037	FDR1%	0.0110764	-0.135429	ns
4011	G3V7I5;Q66HF8	Aldehyde dehydrogenase X, mitochondrial	Aldh1b1	0.0153434	-0.0475176	ns	0.71744	0.00984059	ns
4012	G3V7I7;A0A0G2QC24		Lrrc40	0.37025	0.0182567	ns	0.815717	0.0954303	ns
4013	G3V7I8		Slk	0.0490934	-0.144629	ns	0.319021	-0.0400982	ns
6970	Q99P39-2;Q3MHT2;Q99P39;Q5FWU2	Cysteine desulfurase, mitochondrial	Nfs1;LOC100911034	0.461669	-0.0265187	ns	0.000197681	-0.108321	FDR1%
5088	P62907;Q4KM60;D3Z9F6	60S ribosomal protein L10a;Ribosomal protein	Rpl10a;RGD1562962	0.110535	0.0523427	ns	0.00166893	-0.108244	FDR1%
4016	G3V7J2;Q4V8C7	Interferon-inducible double-stranded RNA-dependent protein kinase activator A	Prkra	0.2117	0.0655503	ns	0.134685	-0.0739958	ns
4017	G3V7J3;Q460M5	Leucine-rich repeat and fibronectin type-III domain-containing protein 2	Lrfn2	NA	NA	NA	0.0978219	0.043693	ns
4021	G3V7K5;A0A1B0GWU5;B2RYH4		Npc1;Cdig2	0.299006	-0.0551056	ns	0.570004	0.0212471	ns
6265	Q63584	Transmembrane emp24 domain-containing protein 10	Tmed10	4.01007e-08	0.105157	FDR1%	0.386616	-0.0209376	ns
4024	G3V7L8;Q6PCU2;D3ZJ78	V-type proton ATPase subunit E 1	Atp6v1e1;Atp6v1e2	0.608054	-0.00110488	ns	0.0212193	0.0509741	ns
4025	G3V7M0;Q4KLK6;B4F783;Q5RK32		Cnot1;RGD1308009	0.0138209	0.0682423	ns	0.2378	0.00452317	ns
5301	Q09073	ADP/ATP translocase 2;ADP/ATP translocase 2, N-terminally processed	Slc25a5	0.00653467	-0.0541358	ns	1.23914e-05	-0.108056	FDR1%
4030	G3V7P3;P18665	39S ribosomal protein L3, mitochondrial	Mrpl3	0.217822	0.0366755	ns	0.184495	-0.0616379	ns
4034	G3V7Q6;P28075	Proteasome subunit beta type;Proteasome subunit beta type-5	Psmb5	0.832669	0.00233223	ns	0.0316549	0.0440872	ns
4036	G3V7R1;O08587	Nuclear pore complex protein Nup50	Npap60;Nup50	0.676283	-0.0667711	ns	NA	NA	NA
4038	G3V7S0;P70627;B5DF85;D4A2Y7	Glutamate carboxypeptidase 2	Folh1;Naalad2	0.952735	0.00845311	ns	0.193519	0.020566	ns
4040	G3V7T3;Q923S8	Pantothenate kinase 4	Pank4	0.153038	0.0571567	ns	NA	NA	NA
4041	G3V7T6;Q9ET34;Q5FVK4		Sf3b1	0.823649	-0.00581555	ns	0.2324	-0.0697112	ns
904	A0A0G2K9A9;D3ZT20		Fbxo41	1.38411e-10	-0.179539	FDR1%	3.61938e-12	0.161886	FDR1%
4044	G3V7U4;P70615	Lamin-B1	Lmnb1	0.0544398	-0.0435097	ns	0.843352	0.0188858	ns
5883	Q5PPJ6		Lars	0.000132082	0.101741	FDR1%	0.00127587	-0.0989289	FDR1%
1874	D3Z941		Mars	1.67066e-06	0.104454	FDR1%	0.0239667	-0.0601803	ns
5957	Q5RKI5		Flii	0.379989	0.034989	ns	0.00182713	-0.106363	FDR1%
4050	G3V7W1;G3V7W1-2		Pdcd6	0.863241	0.0440957	ns	0.012869	0.0988636	ns
1082	A0A0H2UI21;Q704S8	Carnitine O-acetyltransferase	Crat	0.104602	-0.0407247	ns	8.81316e-05	-0.106096	FDR1%
4053	G3V7Y3;P35434	ATP synthase subunit delta, mitochondrial	Atp5d	0.131577	-0.00959245	ns	0.0193107	-0.0297135	ns
4056	G3V7Z4;P07092;O88772	Glia-derived nexin	Serpine2	0.217929	0.103538	ns	0.692092	0.0461147	ns
4057	G3V7Z8		Pabpn1	0.585777	-0.00209495	ns	0.951089	-0.00773585	ns
4058	G3V803;Q9Z1Y3;Q9JIV7	Cadherin-2	Cdh2	0.0456065	-0.0620571	ns	0.160417	-0.0539334	ns
1104	A0A140TA89;P50442	Glycine amidinotransferase, mitochondrial	Gatm	0.470735	-0.0374978	ns	6.16902e-05	-0.105923	FDR1%
4061	G3V818;Q9HB97	Alpha-parvin	Parva	0.105204	0.0300321	ns	0.228441	0.124916	ns
4062	G3V824;Q63002		Igf2r	0.463697	0.027758	ns	0.023761	0.124918	ns
3329	F1LN59;Q5BJU2		Eif4g2	0.0109908	0.0624421	ns	0.00065682	-0.105695	FDR1%
4064	G3V827;Q08415-2;Q08415	Kynurenine--oxoglutarate transaminase 1, mitochondrial	Ccbl1	0.944505	-0.051775	ns	0.56623	0.0316262	ns
4065	Q2QC85;G3V829;A0A1W2Q698		Fubp3	0.773553	0.0119088	ns	0.0896675	-0.0844469	ns
4066	G3V834;Q3T1I4	Protein PRRC1	Prrc1	0.76105	0.0495225	ns	0.599872	-0.060509	ns
2525	D3ZUX5		Chchd3	0.0628331	-0.0587511	ns	0.000365279	-0.105067	FDR1%
2101	D3ZG43		Ndufs3	0.0740361	-0.0321323	ns	0.0013132	-0.104299	FDR1%
2911	D4A5F4		RGD1311575	0.409015	0.0379397	ns	0.000382757	-0.103829	FDR1%
4821	P29117	Peptidyl-prolyl cis-trans isomerase F, mitochondrial	Ppif	0.0279656	-0.044622	ns	0.001091	-0.103459	FDR1%
4073	G3V852;Q498D4;Q3B7U7		Tln1	0.309667	0.0586022	ns	0.167872	0.0370815	ns
2661	D3ZYS7		G3bp1	0.633236	0.00268942	ns	0.00211042	-0.10336	FDR1%
4076	G3V874;Q9JMB2		Epb41l3	0.189926	-0.147305	ns	0.993356	0.0549146	ns
4077	G3V878;Q9WTR7	Signal peptidase complex catalytic subunit SEC11;Signal peptidase complex catalytic subunit SEC11C	Sec11c	0.00848497	0.127495	ns	0.664314	0.00819715	ns
4078	G3V879;Q63619;A0A0U1RRX6	5-demethoxyubiquinone hydroxylase, mitochondrial	Coq7	0.857501	0.0097124	ns	0.275195	-0.0397918	ns
2493	D3ZU56;F1M797;D3ZXE2;Q6TRW4-2;Q6TRW4-3;Q6TRW4;D3ZMU3	Sister chromatid cohesion protein PDS5 homolog B	Pds5b	0.00024585	0.103688	FDR1%	0.0175023	0.102178	ns
4080	G3V886;Q925S8;Q66HP7	ATP-dependent zinc metalloprotease YME1L1	Yme1l1	0.774687	-0.0230281	ns	0.76103	0.00877294	ns
4084	G3V8A5;B5DFC1		Vps35	0.225193	0.00243509	ns	0.0544212	0.030999	ns
2004	D3ZD73		Ddx6	0.000919969	0.0992231	FDR1%	0.69929	-0.0144768	ns
4809	P27274	CD59 glycoprotein	Cd59	0.000126658	0.100215	FDR1%	0.00143077	-0.131072	FDR1%
4091	G3V8D0;P97877		St8sia3	0.863191	0.0182862	ns	0.829122	0.187157	ns
5133	P63312;CON__P21752	Thymosin beta-10	Tmsb10	2.72567e-06	-0.176172	FDR1%	6.28653e-07	0.183498	FDR1%
4094	G3V8E2;Q4FZS7		Strip1	0.669614	-0.0174746	ns	0.0230095	-0.1296	ns
4095	Q3MIF1;G3V8E4		Ubfd1	0.605949	-0.0149139	ns	0.0798581	0.0623002	ns
4096	G3V8F5;Q75Q40	Mitochondrial import receptor subunit TOM40 homolog	Tomm40	0.0688046	0.0316137	ns	0.166596	-0.0499665	ns
4098	G3V8F8;P21263;P21263-2;D3ZWJ2	Nestin	Nes	0.224217	0.0544135	ns	0.576393	0.0105847	ns
4099	G3V8G2;B2RYP1		Psmd5	0.860896	0.093741	ns	0.518703	0.0326059	ns
41	A0A096MJZ0;B1WBZ0		Dnal1;Dnalc1	0.182792	0.0524073	ns	0.00551291	0.109217	ns
410	A0A0G2JYH7;B0BN10		Sh2d3c	0.188236	-0.0806399	ns	0.0308986	-0.150402	ns
4100	G3V8G4;P55068;P55068-2;A0A0G2JYH8	Brevican core protein	Bcan	0.00367078	0.0815303	ns	0.339638	0.00495326	ns
4313	M0R959		Mmab	0.731307	-0.000242861	ns	0.00193402	-0.101247	FDR1%
4654	P11275;F1LZG4;A0A0G2JUV8;Q924T0	Calcium/calmodulin-dependent protein kinase type II subunit alpha	Camk2a	1.8644e-08	-0.170246	FDR1%	1.18375e-17	0.272513	FDR1%
6400	Q66X93;D4A8Y5	Staphylococcal nuclease domain-containing protein 1	Snd1	0.968121	0.00115085	ns	0.0007175	-0.100707	FDR1%
6615	Q6MFX8;Q924M0;Q9Z0U4-2;Q9Z0U4;Q5CC44;Q5CC43;B5D5S8;Q920D8;A0A0G2JUQ1;Q9Z0U4-3;Q9Z0U4-4;Q9Z0U4-5;Q719L2	Gamma-aminobutyric acid type B receptor subunit 1	Gabbr1	0.00519823	-0.0485373	ns	2.28712e-06	-0.0996872	FDR1%
411	A0A0G2JYR4;A0A0G2JYI0;F1LZG6;F1M3T7		Lrba	0.214513	0.070155	ns	0.86117	0.0293368	ns
1490	B2GV87-3;B2GV87-2;B2GV87;P70530;P70529	Receptor-type tyrosine-protein phosphatase epsilon	Ptpre	0.0166066	-0.0482256	ns	0.000214065	-0.0996154	FDR1%
4114	G3V8P3;Q80Z62;Q9QYP2	Cadherin EGF LAG seven-pass G-type receptor 2	Celsr2	0.286675	-0.118363	ns	0.298691	-0.0601018	ns
4115	G3V8P5;Q499P8	RUS1 family protein C16orf58 homolog	RGD1310127	0.171761	-0.0828469	ns	0.132057	-0.063872	ns
5708	Q5BJZ3		Nnt	0.451773	0.0261908	ns	8.28622e-06	-0.0978882	FDR1%
412	D3ZEA3;A0A0G2JYJ1;P0CE43	Growth factor receptor-bound protein 10	Grb10	0.496852	-0.0428979	ns	0.507202	-0.0383428	ns
4121	G3V8Q6;P12368;A0A0G2K405	cAMP-dependent protein kinase type II-alpha regulatory subunit	Prkar2a	0.343742	-0.0588997	ns	0.968085	-0.00487478	ns
4124	G3V8R1;Q9JI85	Nucleobindin-2;Nesfatin-1	Nucb2	0.713287	-0.00448058	ns	0.61601	0.0183126	ns
4979	Q99JD5;P54690;Q9R170	Branched-chain-amino-acid aminotransferase;Branched-chain-amino-acid aminotransferase, cytosolic	Bcat1	0.000977655	0.0985468	FDR1%	5.48078e-12	-0.270264	FDR1%
3134	D4AC36		Eif3f	0.103306	0.073689	ns	0.00100679	-0.0971213	FDR1%
4131	G3V8T4;Q9ESW0	DNA damage-binding protein 1	Ddb1	0.00811809	0.0718314	ns	0.874412	0.00728063	ns
4132	Q4QQS4;G3V8T5		Ruvbl2	0.188782	0.0788174	ns	0.459283	0.0448234	ns
4133	G3V8T7;Q6PCT7		Tdrkh	0.0260089	-0.0423386	ns	0.010211	-0.0666818	ns
5745	Q5FVC4		Dnajb12	0.894136	0.00101807	ns	0.00137821	-0.0966495	FDR1%
4136	G3V8U8;O35854;Q6P784	Branched-chain-amino-acid aminotransferase;Branched-chain-amino-acid aminotransferase, mitochondrial	Bcat2	0.416474	-0.01171	ns	0.836479	-0.0444975	ns
4137	G3V8U9;P34067	Proteasome subunit beta type;Proteasome subunit beta type-4	Psmb4	0.901798	-0.0011019	ns	0.433395	0.0426091	ns
4138	G3V8V0;O08697;A0A1B0GWW8	ADP-ribosylation factor-like protein 2	Arl2	0.162354	0.035498	ns	0.439903	-0.01251	ns
133	A0A0G2JSR1;Q7TP14;A0JPQ9	Chitinase domain-containing protein 1	Chid1	0.00874263	-0.091375	ns	0.000853497	-0.0956024	FDR1%
4141	G3V8W2;Q91XU8	Phosphatidate cytidylyltransferase;Phosphatidate cytidylyltransferase 2	Cds2	0.86253	0.0219821	ns	0.126472	-0.15919	ns
6724	Q6T487;Q6GMN8		Actn1	0.000448359	-0.113842	FDR1%	1.62514e-06	-0.176984	FDR1%
4145	G3V8Y5	DNA-directed RNA polymerase	Polr2b	0.141428	0.124093	ns	0.394556	0.0503229	ns
4146	G3V8Y8;Q8VHU1		Hip1	0.815557	0.0122754	ns	0.00323474	-0.0872761	ns
1968	D3ZC56		Dst	7.91943e-06	0.0931017	FDR1%	4.20587e-20	-0.157897	FDR1%
4153	G3V918		Gart	0.600919	0.0192741	ns	0.0534537	0.0722715	ns
5090	P62912;D4A412;D4A647	60S ribosomal protein L32	Rpl32;LOC688684;Gm21893	0.000131203	0.0980081	FDR1%	0.0875516	-0.0394912	ns
4156	G3V928;Q5I0H1		Lrp1	0.901294	0.0181767	ns	0.349396	0.0256786	ns
4157	G3V936;Q8VHF5;Q0QEL8	Citrate synthase;Citrate synthase, mitochondrial	Cs	0.0198168	-0.0394518	ns	0.380277	-0.025372	ns
4158	G3V940;O89046;Q920J3	Coronin;Coronin-1B;Coronin-6	Coro1b;Coro6	0.30232	-0.044548	ns	0.800348	-0.0056	ns
6099	Q5XID7;A0A0G2KAU2	Armadillo repeat-containing X-linked protein 3	Armcx3	0.258335	-0.0188891	ns	2.42694e-05	-0.0952842	FDR1%
4160	G3V946;Q8K3E7	Protein dpy-30 homolog	Dpy30	0.682764	0.0006868	ns	0.150437	-0.00298275	ns
4311	M0R907		Snrpd3	0.834972	-0.00187211	ns	0.00112503	-0.0933517	FDR1%
4165	G3V964		Ntm	0.404004	-0.106113	ns	0.447127	-0.113468	ns
4166	G3V965		Agpat5	0.330387	0.00144615	ns	0.499263	-0.0364451	ns
2876	D4A4P3;M0RA24		LOC100361144;LOC100362391	0.0209174	-0.0540193	ns	0.000164264	-0.0924932	FDR1%
4169	G3V984;A0A0G2K1X6		Bsn	0.0241906	-0.133477	ns	0.531553	-0.0425946	ns
417	A0A0G2JYN4;Q5XIS4		Ergic2	0.0315709	0.106495	ns	0.152373	-0.053329	ns
1582	B2RYW9	Fumarylacetoacetate hydrolase domain-containing protein 2	Fahd2	0.00177603	-0.0870215	ns	0.000885424	-0.0915676	FDR1%
1486	B2GV75;P84850;A0A0A0MXZ3	D-2-hydroxyglutarate dehydrogenase, mitochondrial	D2hgdh	0.0263177	-0.0417863	ns	0.000203496	-0.0913671	FDR1%
418	A0A0G2JYQ3;A0A0G2K678;F1LQJ1;P0CB49	YLP motif-containing protein 1	Ylpm1	0.0307865	-0.0899425	ns	0.0187108	-0.122576	ns
4180	G3V9H0;P50904	Ras GTPase-activating protein 1	Rasa1	0.0180237	0.0435458	ns	0.158436	-0.0429283	ns
4186	G3V9L1;Q5XI82;Q4QQV5		Tex2	0.756719	-0.0904619	ns	0.957334	-0.18783	ns
1742	B5DF95;A0A0G2K782		Zc2hc1a	0.000225911	-0.155886	FDR1%	0.000183259	0.220609	FDR1%
4189	G3V9M7;P52190	Inward rectifier potassium channel 4	Kcnj4	0.513612	-0.020473	ns	NA	NA	NA
419	A0A0G2JYR1;B5DEY3		Exoc6b	0.924505	0.0494499	ns	0.834925	-0.000736026	ns
4191	G3V9N1;Q562B5	Serine/threonine-protein phosphatase PGAM5, mitochondrial	Pgam5	0.230499	-0.027884	ns	0.0905732	-0.0386958	ns
4194	G3V9P0;Q9WTV5	26S proteasome non-ATPase regulatory subunit 9	Psmd9	0.127118	0.0391274	ns	0.0136131	0.150562	ns
4195_m	P51111;G3V9P7;Q6RW62		Htt	0.457572	-0.0356744	ns	0.228	-0.0536379	ns
4198	G3V9S0;Q5EB81	NADH-cytochrome b5 reductase;NADH-cytochrome b5 reductase 1	Cyb5r1	0.404344	-0.0536901	ns	0.391927	0.0226364	ns
4842	P32089	Tricarboxylate transport protein, mitochondrial	Slc25a1	0.978889	-0.00888207	ns	3.68516e-06	-0.0913357	FDR1%
4200	G3V9T7;Q4G022	ATPase Asna1;Arsenical pump-driving ATPase	Asna1	0.775399	0.0177658	ns	0.166602	-0.0402534	ns
4202	G3V9U2;A0A0G2K642;P13437	3-ketoacyl-CoA thiolase, mitochondrial	Acaa2	0.028558	-0.0617642	ns	0.00961601	-0.0933597	ns
4206	G3V9W5;O88370	Phosphatidylinositol 5-phosphate 4-kinase type-2 gamma	Pip4k2c	0.159868	-0.00809942	ns	0.0584232	-0.067998	ns
6048	Q5XHZ0	Heat shock protein 75 kDa, mitochondrial	Trap1	0.503105	-0.00502968	ns	0.000176863	-0.0911803	FDR1%
6895	Q8R491;A0A0G2JTH6	EH domain-containing protein 3	Ehd3	0.716839	-0.03291	ns	1.06006e-07	-0.0898932	FDR1%
421	A0A0G2JYU2;Q5XIE3	39S ribosomal protein L11, mitochondrial	Mrpl11	0.605427	0.0144513	ns	0.558098	-0.0747383	ns
6118	Q5XIH3		Ndufv1	0.0045327	-0.0650351	ns	4.11654e-07	-0.089604	FDR1%
4212	H1UBN0;D3ZWR4		Cpne7	0.541287	-0.0179358	ns	0.324392	-0.0437483	ns
480	A0A0G2JZZ4			0.00028171	-0.244249	FDR1%	0.00111898	-0.166843	FDR1%
4215	I2FHN3;P07154	Cathepsin L1;Procathepsin L;Cathepsin L1 heavy chain;Cathepsin L1 light chain	CatL;Ctsl	0.877485	-0.00385025	ns	0.525293	0.102154	ns
4216	I6L9G6		Tardbp	0.044059	0.109152	ns	0.372245	0.0053911	ns
3554	F1LWE6		Msi2	0.270299	0.0764958	ns	0.000458204	-0.0886298	FDR1%
4225	M0R3M4;D4A054		Ranbp2	0.863285	-0.000682617	ns	0.00289699	-0.0455676	ns
4227	M0R3N4		Vat1l	0.895299	0.00768594	ns	0.52815	0.0278397	ns
423	A0A0G2JYU6			0.447957	0.0325063	ns	0.104573	-0.234776	ns
4231	M0R3Z8		Rbm15	0.00496455	-0.111587	ns	0.63409	-0.0115018	ns
6808	Q7TP77		Mrpl49	0.0923174	-0.0193078	ns	0.000441811	-0.0880119	FDR1%
4233	M0R436		Rnf170	0.103081	0.0584072	ns	0.0223589	-0.110429	ns
4240	M0R4P9;A0A0G2JUK4		Ube2h	0.0874514	-0.107402	ns	0.565559	-0.00751714	ns
6914	Q8VIL3;B3SVE5	ZW10 interactor	Zwint	3.35954e-05	0.0979232	FDR1%	0.170947	-0.0293532	ns
4243	M0R531;O88407	Protein lifeguard 2	Faim2	0.680319	0.011787	ns	0.01236	-0.0902944	ns
2265	D3ZLK9;D4AAT7	ATP-dependent (S)-NAD(P)H-hydrate dehydratase	Carkd	0.476209	0.01029	ns	5.8694e-05	-0.0870502	FDR1%
4246	M0R567;Q5EIC4	Interferon regulatory factor 2-binding protein-like	Irf2bpl	0.0561911	0.166848	ns	NA	NA	NA
4779	P21913	Succinate dehydrogenase [ubiquinone] iron-sulfur subunit, mitochondrial	Sdhb	0.0972359	-0.0613615	ns	0.000870095	-0.0869007	FDR1%
4251	M0R5I3;M0R953;Q66H40	High mobility group nucleosome-binding domain-containing protein 3	Hmgn3	0.30213	-0.106799	ns	0.81277	-0.0324101	ns
4690	P13803	Electron transfer flavoprotein subunit alpha, mitochondrial	Etfa	0.23402	-0.0256361	ns	0.000132002	-0.0865366	FDR1%
4253	M0R5N4	Prefoldin subunit 4	Pfdn4	0.418418	-0.0154422	ns	0.910136	-0.0299455	ns
4254	M0R5P8;F1M542		Adam22	0.0521539	-0.0347566	ns	0.159653	-0.022632	ns
4255	M0R920;M0R5Q3;M0RD63		Ranbp3	0.0345991	0.093587	ns	0.35194	0.0608923	ns
5819	Q5I0P2;Q9QYU8;A0A0G2JZ02;A0A0G2JYW6	Glycine cleavage system H protein, mitochondrial	Gcsh	0.670819	0.0310658	ns	0.000105467	-0.0862002	FDR1%
4428	O35331;G3V647;D3Z8P5	Pyridoxal kinase	Pdxk;RGD1566085	0.955327	-0.00969972	ns	0.000680161	-0.0845319	FDR1%
4262	M0R617;Q62985-2;Q62985	SH2B adapter protein 1	Sh2b1	0.687772	0.0108309	ns	0.0314236	0.127287	ns
4267	M0R6E0	Phospholipid-transporting ATPase	Atp9a	0.935196	-0.0142017	ns	0.978022	0.0194282	ns
4268	M0R6E6		Safb2	NA	NA	NA	0.61143	0.0173103	ns
4270	M0R6J0		Mrpl39	0.805498	0.0406422	ns	0.499673	-0.0147256	ns
4272	M0R6L8		Dnajc19	NA	NA	NA	0.547753	0.00562251	ns
4275	M0R6T4		Mms19	0.329307	0.0821181	ns	0.359315	0.118245	ns
4278	M0R735			0.144244	0.03705	ns	0.573766	-0.103973	ns
428	A0A0G2JZ27			0.857369	-0.0705502	ns	0.680629	-0.00450222	ns
4282	M0R776;A0A0G2JZC3		Mrps36	0.511743	0.00558571	ns	0.00421171	-0.0720563	ns
4283	M0R7A6		Itsn2	0.386537	0.0152793	ns	0.849634	0.0402345	ns
4284	M0R7B4		LOC684828	0.508005	-0.110903	ns	0.356643	0.0210965	ns
4286	M0R7F3;A0A0U1RRZ0;A0A0U1RRY0		Wasf3	0.273902	-0.0664891	ns	0.509509	-0.049518	ns
4287	M0R7G4;M0R7V3		Apoo	0.0512483	-0.0821298	ns	0.0880524	-0.0493555	ns
4288	Q9Z0N9;Q6P6T9;M0R7I0	Importin subunit alpha	Kpna2;LOC100359600	0.347441	0.074434	ns	0.169964	-0.0739313	ns
493	A0A0G2K093;O35162	Heat shock 70 kDa protein 13	Hspa13	0.000161779	0.0966524	FDR1%	0.023341	-0.021494	ns
2645	D3ZY71		LOC100910137	0.00156321	-0.0943255	ns	0.00180263	-0.0842854	FDR1%
4295	M0R809;O35357	Guanine nucleotide-binding protein subunit gamma	Gng4	0.801976	-0.070897	ns	0.716298	0.0205395	ns
4297	M0R830;Q6P5P5	Mesoderm-specific transcript homolog protein	Mest	0.00362023	0.146727	ns	0.107826	-0.111886	ns
4299	M0R835		Sf3b6	0.256758	0.0782839	ns	0.796978	0.0146109	ns
4300	M0R868	Sulfotransferase	Chst2	0.00765222	0.173486	ns	0.349022	-0.125055	ns
4302	M0R8C1;Q0VGJ9;A0A0G2K1L5	Receptor expression-enhancing protein	Reep2	0.576392	-0.0592539	ns	0.952338	-0.149237	ns
2676	M0RAX4;D3ZZ54;P62882;Q45QL0	Guanine nucleotide-binding protein subunit beta-5	Gnb5	0.0383975	-0.0440192	ns	1.62024e-06	-0.0840598	FDR1%
4309	M0R8V0		LOC100910056	0.346127	0.0114023	ns	0.00968978	-0.158375	ns
431	F1LY70;A0A0G2JZ53		Birc6	0.750376	0.00180353	ns	0.190599	-0.0632873	ns
5929	Q5RJR8;A0A0G2K6J3	Leucine-rich repeat-containing protein 59	Lrrc59	0.00593658	0.0814188	ns	3.20891e-06	-0.0835838	FDR1%
4312	M0R919		Vbp1	0.948234	0.00174947	ns	0.157205	0.0367184	ns
6238	Q63362	NADH dehydrogenase [ubiquinone] 1 alpha subcomplex subunit 5	Ndufa5	0.00184232	-0.0741944	ns	0.000202162	-0.0834429	FDR1%
3253	E9PT66;B5DF12		Sf3b3	0.571739	-0.0202444	ns	3.55136e-05	-0.0825388	FDR1%
4321	M0R9L0;B2RYX0		Naca	0.557296	0.0281332	ns	0.00517284	-0.118113	ns
4322	M0R9L2;Q08406	Ciliary neurotrophic factor receptor subunit alpha	Cntfr	0.594944	0.0271645	ns	0.0109451	0.0842867	ns
4323	M0R9Q1;M0R3R6;Q920B2		LOC100911677;Rbm14	0.767365	-0.0069072	ns	0.268323	-0.0163437	ns
4325	M0R9T2		Erbb2ip	0.0338018	0.224818	ns	NA	NA	NA
4650	Q6P7A4;P10960;F7EPE0	Sulfated glycoprotein 1	Psap	2.58107e-12	0.133098	FDR1%	1.12759e-27	0.201073	FDR1%
4329	M0RA15;Q4V8J7	Spindlin-1	Spin1	NA	NA	NA	0.0185663	-0.0727154	ns
433	A0A0G2JZ60			0.283343	-0.0218654	ns	0.0110724	0.158143	ns
4333	M0RAD5	ATP-dependent Clp protease proteolytic subunit	Clpp	0.788908	-0.00915179	ns	0.216383	-0.011679	ns
4337	M0RAK2		LOC684270	0.331728	0.0386198	ns	0.511976	-0.011537	ns
1997	D3ZCZ9;P52504	NADH dehydrogenase [ubiquinone] iron-sulfur protein 6, mitochondrial	LOC100912599;Ndufs6	0.0274293	-0.0509837	ns	9.45396e-06	-0.0817171	FDR1%
3533	F1LV89;Q5EB70		Rap1gap	0.506375	-0.0138678	ns	3.65349e-05	-0.0771983	FDR1%
4340	M0RAQ6	Hexokinase	Hk1	0.0808033	-0.02772	ns	0.257909	-0.0270447	ns
4342	M0RAS4		Igsf21	0.0716743	0.184717	ns	0.449321	0.0489644	ns
4346	M0RB22		Ptprd	0.346959	0.00336805	ns	0.0206565	-0.0867966	ns
5047	P62076	Mitochondrial import inner membrane translocase subunit Tim13	Timm13	0.119533	-0.0198729	ns	1.04449e-05	-0.0766025	FDR1%
4350	M0RBE5;O08957	Neuritin	Nrn1	0.163974	-0.0571562	ns	0.280131	-0.0337476	ns
4353	M0RBL8		Tceal6	0.0505041	0.204607	ns	0.671911	0.0505091	ns
4355	M0RBS9;G3V8U4;Q8K4V4;Q8K4V4-2;Q5I0L6	Sorting nexin-27;Cytohesin-interacting protein	Snx27;Cytip	0.803544	-0.0301475	ns	0.486872	-0.0262464	ns
4357	M0RC17;O88524		Chl1	0.862444	0.0220043	ns	0.144684	-0.0579342	ns
4359	M0RC57		Smap1	0.783132	-0.0503625	ns	0.00686219	0.163107	ns
6107	Q5XIF3	NADH dehydrogenase [ubiquinone] iron-sulfur protein 4, mitochondrial	Ndufs4	0.793461	-0.0235836	ns	0.000750718	-0.0758501	FDR1%
4361	M0RC99	Ras-related protein Rab-5A	Rab5a	0.131782	0.0753311	ns	0.996698	0.0447529	ns
4363	M0RCH6;D4A9Z8		Chmp4b;Chmp4bl1	0.00340786	0.119051	ns	0.00573442	0.169039	ns
4364	M0RCJ9;Q7TPB7		LOC100911027;Mal2	0.892495	0.017276	ns	0.4615	0.0715706	ns
4367	M0RCX0		Pcbd2	0.116204	0.0930139	ns	0.671917	0.01773	ns
4368	M0RCY2;P62278;Q7TP70;F1LMB4	40S ribosomal protein S13	LOC683961;Rps13;Bco2;Tex12	0.100429	0.0702505	ns	0.0201759	-0.124584	ns
437	A0A0G2JZ88			NA	NA	NA	0.257315	0.119593	ns
4370	M0RD20;Q64537;A0A0G2K6H7	Calpain small subunit 1	Capns1	0.081064	0.0427186	ns	0.0450349	0.0620162	ns
7064	Q9JLA3	UDP-glucose:glycoprotein glucosyltransferase 1	Uggt1	0.723142	0.00267977	ns	0.000134493	-0.0757355	FDR1%
5642	Q561S0;A0A1W2Q6F8;Q6P6W6	NADH dehydrogenase [ubiquinone] 1 alpha subcomplex subunit 10, mitochondrial	Ndufa10	0.00264434	-0.0486085	ns	0.000313544	-0.0755425	FDR1%
4373	M0RDD7;Q498T2-2;Q498T2	Chromatin target of PRMT1 protein	Chtop	0.338633	-0.0645537	ns	0.129477	-0.0531538	ns
4378	M0RDK9		Acad8	0.0713766	-0.0239107	ns	0.256442	-0.0145089	ns
4379	M0RDM7		LOC100910143	0.973494	-0.036777	ns	0.28065	-0.177854	ns
4381	M0RDU0		F8a1	0.285059	-0.0419834	ns	0.027993	-0.133095	ns
2240	Q9ERS3;D3ZKP9;Q8CFG7;A0A0G2K7E5;Q8VHS9;P54290;A0A0G2K8L7	Voltage-dependent calcium channel subunit alpha-2/delta-1;Voltage-dependent calcium channel subunit alpha-2-1;Voltage-dependent calcium channel subunit delta-1	Cacna2d1	0.190506	-0.0105739	ns	0.00239612	-0.075515	FDR1%
4944	P50554	4-aminobutyrate aminotransferase, mitochondrial;4-aminobutyrate aminotransferase, brain isoform;4-aminobutyrate aminotransferase, liver isoform	Abat	0.661775	-0.00951249	ns	5.30243e-09	-0.0746258	FDR1%
4211	G3V9Z3;B2GV33;P21396	Amine oxidase [flavin-containing] A	Maoa	0.877953	0.0107712	ns	1.76703e-06	-0.0744388	FDR1%
4388	O08629	Transcription intermediary factor 1-beta	Trim28	0.00874632	0.0695927	ns	0.0234667	0.0500668	ns
4389	O08651	D-3-phosphoglycerate dehydrogenase	Phgdh	0.422374	-0.012812	ns	0.0116555	0.0321861	ns
439	A0A0G2JZA2;P97576	GrpE protein homolog 1, mitochondrial	Grpel1	0.491151	0.0142512	ns	0.00853484	-0.138032	ns
4390	O08658	Nuclear pore complex protein Nup88	Nup88	0.558985	-0.0881749	ns	0.209211	0.113989	ns
4741	P19234	NADH dehydrogenase [ubiquinone] flavoprotein 2, mitochondrial	Ndufv2	0.00418437	-0.0500246	ns	0.000402408	-0.0738695	FDR1%
4392	O08678;A0A0G2K7H9	Serine/threonine-protein kinase MARK1	Mark1	0.0182133	-0.0739858	ns	0.972984	-0.0385893	ns
4393	O08700	Vacuolar protein sorting-associated protein 45	Vps45	0.113228	-0.000913304	ns	0.0164195	-0.0565123	ns
4396	O08730;F8WFR6;A0A0G2JXP1	Glycogenin-1	Gyg1	0.387325	0.0200386	ns	0.119071	0.0686864	ns
4399	O08776-4;O08776;O08776-2;O08776-3	NADH dehydrogenase [ubiquinone] 1 alpha subcomplex assembly factor 3	Ndufaf3	0.245264	-0.0461553	ns	0.00268417	-0.109906	ns
3759	F1M949;Q32Q01		Ckap5	0.269592	-0.00942854	ns	2.34333e-05	-0.0733519	FDR1%
4403	O08835	Synaptotagmin-11	Syt11	0.175437	0.0781266	ns	0.0193401	0.0628881	ns
4405	O08838;A0A0G2K5Z4	Amphiphysin	Amph	0.104775	-0.0598109	ns	0.0898016	0.113065	ns
4406	O08839-2;O08839;O08839-5;F1LMX1;O08839-3;D4A4P1;Q5HZA7;O08839-6;O08839-4	Myc box-dependent-interacting protein 1	Bin1	0.214901	-0.0658155	ns	0.447868	0.0132657	ns
1459	B2GUZ3		Mthfd1l	0.0303494	-0.0481006	ns	4.78354e-07	-0.0711384	FDR1%
4159	G3V945;P51650;P51650-2	Succinate-semialdehyde dehydrogenase, mitochondrial	Aldh5a1	0.311538	-0.0418018	ns	0.000243437	-0.070704	FDR1%
1781	B6DTP5;Q6AYI1;O88757		Ddx5;ddx5	0.100449	-0.0185158	ns	4.65378e-06	-0.0678883	FDR1%
4412	O35092;Q6P6W9	Mitochondrial import inner membrane translocase subunit Tim17-A	Timm17a	0.820028	0.0119427	ns	0.340187	-0.0958199	ns
6894	Q8R490;F1M7X3		Cdh13	0.0118723	0.0869434	ns	0.000558759	-0.0677018	FDR1%
5219	P97615	Thioredoxin, mitochondrial	Txn2	0.305831	-0.042873	ns	0.000953934	-0.0673691	FDR1%
4749	P19511	ATP synthase F(0) complex subunit B1, mitochondrial	Atp5f1	0.0273374	-0.0395458	ns	0.000514645	-0.0667606	FDR1%
4416	O35165	Golgi SNAP receptor complex member 2	Gosr2	0.991386	-0.0295204	ns	0.438121	-0.0925534	ns
3982	G3V741;Q6IRH6;P16036	Phosphate carrier protein, mitochondrial	Slc25a3	0.0175972	-0.0450504	ns	4.57025e-05	-0.0661239	FDR1%
3885	G3V640;O35094	Mitochondrial import inner membrane translocase subunit TIM44	Timm44	0.00814392	-0.0514725	ns	0.000216159	-0.0647448	FDR1%
5921	Q5RJK6		Inpp1	4.46409e-05	-0.15245	FDR1%	4.97614e-07	0.145098	FDR1%
1793	C0JPT7		Flna	4.72486e-07	0.129201	FDR1%	0.00256404	0.0554236	FDR1%
6000	Q5U2U0	ATP-dependent Clp protease ATP-binding subunit clpX-like, mitochondrial	Clpx	0.844762	0.000515331	ns	2.80874e-05	-0.0624933	FDR1%
6203	Q62920;Q62920-2	PDZ and LIM domain protein 5	Pdlim5	0.000635823	0.0949834	FDR1%	0.185095	0.0638627	ns
3762	F1M953;P48721	Stress-70 protein, mitochondrial	Hspa9	0.00168113	0.03902	ns	0.00112043	-0.0622756	FDR1%
4425	O35303;O35303-5;O35303-4;O35303-6	Dynamin-1-like protein	Dnm1l	0.0820739	-0.0229052	ns	0.0293369	0.130217	ns
7185	Q9Z2X5;Q6IRH2	Homer protein homolog 3	Homer3	0.000417268	-0.146501	FDR1%	7.20362e-19	0.774854	FDR1%
716	D3ZJH9;A0A0G2K502	Malic enzyme	Me2	0.695176	0.0315172	ns	0.000866089	-0.0618062	FDR1%
1215	A2VD12	Pre-B-cell leukemia transcription factor-interacting protein 1	Pbxip1	0.86352	-0.011732	ns	0.00125701	-0.0609856	FDR1%
6766	Q75Q39;R9PXR4	Mitochondrial import receptor subunit TOM70	Tomm70a	0.0132381	-0.0465706	ns	0.00122425	-0.0608156	FDR1%
4108	G3V8L3;P48679;A0A0G2JTC5;P70482;Q6P6U3;A0A0G2K3R2;A0A1B0GWU9	Prelamin-A/C;Lamin-A/C	Lmna;C2.1	0.208982	0.00906032	ns	8.20059e-06	-0.060783	FDR1%
4432	O35431	Amyloid beta A4 precursor protein-binding family A member 2	Apba2	0.367238	0.0182102	ns	0.019632	-0.0725325	ns
4525	O88954;Q33DY7	MAGUK p55 subfamily member 3	Mpp3	7.59937e-07	-0.205489	FDR1%	1.9092e-05	-0.166839	FDR1%
6790	Q7M0E7	39S ribosomal protein L14, mitochondrial	Mrpl14	0.553535	-0.0244342	ns	0.00208467	-0.0591718	FDR1%
2730	D4A0T0		Ndufb10	0.758983	-0.0140756	ns	0.000239743	-0.0586737	FDR1%
6332	Q64428;Q99521	Trifunctional enzyme subunit alpha, mitochondrial;Long-chain enoyl-CoA hydratase;Long chain 3-hydroxyacyl-CoA dehydrogenase	Hadha	0.992675	-0.0236284	ns	0.000406657	-0.0578604	FDR1%
4437	O35550;G3V9J7	Rab GTPase-binding effector protein 1	Rabep1	0.884407	0.0125695	ns	0.211379	0.0213543	ns
4003	G3V7G0;Q9QXU8	Cytoplasmic dynein 1 light intermediate chain 1	Dync1li1	5.36765e-05	0.0948234	FDR1%	0.111438	0.0599764	ns
444	A0A0G2JZC6;F1LQS9;Q9ES67	Rho guanine nucleotide exchange factor 11	Arhgef11	0.461711	-0.0229298	ns	0.0627308	0.124793	ns
4441	O35795;O35795-2;Q5RJP4;F1M7N2	Ectonucleoside triphosphate diphosphohydrolase 2	Entpd2	0.558388	0.143071	ns	0.832692	-0.0529562	ns
4442	O35796	Complement component 1 Q subcomponent-binding protein, mitochondrial	C1qbp	0.846233	0.00303824	ns	0.735344	-0.00500738	ns
4444	O35814	Stress-induced-phosphoprotein 1	Stip1	0.788757	0.0163469	ns	0.27364	0.0190268	ns
4445	O35820	2-deoxynucleoside 5-phosphate N-hydrolase 1	Dnph1	0.55478	0.00635974	ns	0.317397	0.1643	ns
6303	Q641X3	Beta-hexosaminidase subunit alpha	Hexa	0.00092145	0.0925811	FDR1%	0.00768637	0.0781666	ns
5107	P63029;F1LYR7	Translationally-controlled tumor protein	Tpt1	0.000205733	0.0908948	FDR1%	0.742105	-0.021747	ns
445	A0A0G2JZD1			0.0911513	-0.118955	ns	0.224459	0.0363579	ns
4450	O35889	Afadin	Mllt4	0.106458	-0.18617	ns	0.639172	0.0952429	ns
4453	O35964	Endophilin-A2	Sh3gl1	0.085032	-0.0663435	ns	0.542026	0.0430028	ns
4456	O54701;O54701-2	Sodium/potassium/calcium exchanger 2	Slc24a2	0.00164839	-0.295918	ns	0.00483508	0.212546	ns
4457	O54783	Choline/ethanolamine kinase	Chkb	0.118222	-0.0374652	ns	0.625876	0.0780476	ns
4458	O54800;A0A0G2K2C1;O54800-2;Q9JIW0	Cadherin-8	Cdh8	NA	NA	NA	0.777258	0.0464316	ns
4459	O54857		Pten	0.152308	0.089736	ns	0.0050114	0.192612	ns
3838	F7EN52;A0A0G2JWG7		Cyp46a1	7.18231e-06	-0.120161	FDR1%	1.16253e-07	-0.164959	FDR1%
4462	O54922	Exocyst complex component 7	Exoc7	0.470797	0.0255376	ns	0.461692	-0.00958076	ns
4463	O54924	Exocyst complex component 8	Exoc8	0.49246	0.00500786	ns	0.601637	0.036542	ns
4466	O55096	Dipeptidyl peptidase 3	Dpp3	0.757498	-0.000468528	ns	0.467982	0.0636487	ns
447	D3ZAL7;A0A0G2JZD5;C6JUQ2		Gab1	0.110949	-0.0891132	ns	0.330707	0.0221962	ns
4470	Q6IMX8;O55171	Acyl-coenzyme A thioesterase 2, mitochondrial	Acot2	0.27978	0.0719279	ns	0.360648	-0.0273396	ns
275	A0A0G2JVL6;Q7TP78;F7EXQ7		Ndufa8	0.572424	-0.0222143	ns	0.000343562	-0.0575367	FDR1%
4849	P32577	Tyrosine-protein kinase CSK	Csk	1.47753e-06	0.124323	FDR1%	4.36374e-08	0.13432	FDR1%
4478	O70257;M0R930;A0A0G2K6Y9	Syntaxin-7	Stx7;LOC100910446	0.0556557	-0.0343907	ns	0.014889	0.026234	ns
4481	O70377;M0R4V3	Synaptosomal-associated protein 23;Synaptosomal-associated protein	Snap23	0.0217643	0.141118	ns	0.181576	-0.0459038	ns
4483	O70441;A0A096MIT7	Synapsin-3	Syn3	0.133627	-0.118596	ns	0.293798	0.0185833	ns
4488	O70593	Small glutamine-rich tetratricopeptide repeat-containing protein alpha	Sgta	0.778508	-0.0459693	ns	0.290422	-0.00264416	ns
4489	O70595;A0A0G2K4U1;Q9Z1S2	ATP-binding cassette sub-family B member 6, mitochondrial	Abcb6	0.535326	0.000990356	ns	0.888842	0.0178907	ns
449	A0A0G2JZF0;B5DEG8		Sec24c	0.569451	0.0117643	ns	0.170503	0.0253584	ns
4495	Q9QX80;Q9Z0U8;O88311;Q9QX81		Hnrnpab;alf-c1	0.966619	0.0208495	ns	0.419759	-0.0507631	ns
4498	O88377	Phosphatidylinositol 5-phosphate 4-kinase type-2 beta	Pip4k2b	0.949902	-0.0452312	ns	0.0761439	0.0753761	ns
4502	O88506;A0A0G2K007	STE20/SPS1-related proline-alanine-rich protein kinase	Stk39	0.378769	0.0358288	ns	0.244557	0.0346065	ns
4506	O88637-2;O88637	Ethanolamine-phosphate cytidylyltransferase	Pcyt2	0.113085	0.0305341	ns	0.029582	0.0413902	ns
4507	O88656	Actin-related protein 2/3 complex subunit 1B	Arpc1b	NA	NA	NA	0.0675601	0.206826	ns
451	A0A0G2JZF6			0.168818	-0.0312571	ns	0.00530942	-0.114715	ns
4510	O88763	Phosphatidylinositol 3-kinase catalytic subunit type 3	Pik3c3	0.852858	0.0301268	ns	0.21578	0.0929831	ns
3467	F1LRZ7;P16884	Neurofilament heavy polypeptide	Nefh	0.01606	-0.0654448	ns	3.06026e-06	-0.0556811	FDR1%
5205	P97532	3-mercaptopyruvate sulfurtransferase	Mpst	0.886179	0.00276349	ns	0.000216566	-0.0505321	FDR1%
4513	O88775;A0A0G2JWP4;A0A0G2JU92	Embigin	Emb	0.0824536	0.0993904	ns	0.72533	-0.0150378	ns
4518	O88794	Pyridoxine-5-phosphate oxidase	Pnpo	0.724748	-0.0389138	ns	0.14118	0.0754608	ns
4519	O88801;O88801-2	Homer protein homolog 2	Homer2	0.146789	-0.134769	ns	0.170275	0.0966407	ns
822	A0A0G2K7G7;G3V9Z6;B0BNF1;A0A0G2JVY6	Septin-8	Sept8	0.0462897	-0.057679	ns	0.000597104	-0.0497828	FDR1%
4520	O88808	Tubby protein homolog	Tub	0.00231955	-0.159567	ns	0.70601	-0.00633834	ns
4571	P06685;Q64608	Sodium/potassium-transporting ATPase subunit alpha-1	Atp1a1	6.41988e-09	-0.136389	FDR1%	6.11135e-17	-0.159705	FDR1%
4526	O88989	Malate dehydrogenase, cytoplasmic	Mdh1	0.160262	-0.0107098	ns	0.00457475	0.119206	ns
5278	Q6P9Y4;Q05962	ADP/ATP translocase 1	Slc25a4	0.0218256	-0.0341304	ns	4.92768e-06	-0.0489292	FDR1%
4528	O89049;A0A0G2JUN7;R9PXU4	Thioredoxin reductase 1, cytoplasmic	Txnrd1	0.799644	0.0195872	ns	0.0115985	0.144038	ns
4529	P00173-2;P00173	Cytochrome b5	Cyb5a	0.842114	0.0139734	ns	0.801106	0.066317	ns
6125	Q5XIJ3;P41565	Isocitrate dehydrogenase [NAD] subunit, mitochondrial;Isocitrate dehydrogenase [NAD] subunit gamma 1, mitochondrial	Idh3g	0.00999776	-0.0478844	ns	1.23566e-05	-0.0481742	FDR1%
4530	P00388	NADPH--cytochrome P450 reductase	Por	0.0139445	0.0429986	ns	0.00293761	-0.0574057	ns
4531	Q5M897;P00481	Ornithine carbamoyltransferase, mitochondrial	Otc	0.0849669	-0.159328	ns	NA	NA	NA
4460	O54861	Sortilin	Sort1	2.88196e-06	-0.14949	FDR1%	8.7829e-07	-0.154587	FDR1%
4535	P01041	Cystatin-B	Cstb	0.471436	0.0728813	ns	0.474124	0.0962342	ns
3712	F1M779;P11442	Clathrin heavy chain;Clathrin heavy chain 1	Cltc	0.36097	0.00494715	ns	3.09305e-18	-0.0465873	FDR1%
454	A0A0G2JZH8;Q5BJX2;Q7TQ85		Pdhx	0.719731	-0.0194461	ns	0.798605	-0.00772775	ns
4544	P03994;A1A5N6;P03994-2	Hyaluronan and proteoglycan link protein 1	Hapln1	0.000137688	0.0919665	FDR1%	7.57548e-07	-0.132245	FDR1%
4546	P04166;Q63144	Cytochrome b5 type B	Cyb5b	0.426957	-0.0150711	ns	0.290457	-0.012556	ns
3333	F1LN92;Q5BJM6		Afg3l2	0.34804	0.000522969	ns	0.00019836	-0.0459679	FDR1%
4549	Q6P6G9;Q5I0M7;P04256;F1M2S4;D4ACJ7;A0A0G2K3G4;F1M6C7	Heterogeneous nuclear ribonucleoprotein A1;Heterogeneous nuclear ribonucleoprotein A1, N-terminally processed	Hnrnpa1;Hnrpa1	0.0517383	-0.0497685	ns	0.0963974	-0.0389584	ns
4550	P04631	Protein S100-B	S100b	0.239162	-0.0511039	ns	0.394565	0.0937265	ns
4551	P04636;Q0QF43	Malate dehydrogenase, mitochondrial;Malate dehydrogenase	Mdh2	0.851069	-0.0421143	ns	0.340888	-0.0282143	ns
5848	Q5M918;F7EQ81;Q32KJ5		Gns	8.42517e-05	0.123177	FDR1%	1.43178e-07	0.115381	FDR1%
4554_m	P04775;F1M9G9;A0A0G2K207;A9JQD7	Sodium channel protein type 2 subunit alpha	Scn2a	0.0240994	-0.133595	ns	0.470161	-0.0287564	ns
4805	P26772;P97601;A0A0G2JTG1	10 kDa heat shock protein, mitochondrial	Hspe1	0.0565764	-0.0296174	ns	0.000920151	-0.0404176	FDR1%
4556	Q45QN0;P04897;Q5EEY4;Q5EEY3	Guanine nucleotide-binding protein G(i) subunit alpha-2	Gnai2	0.282666	0.0413789	ns	0.473049	0.036747	ns
4558	P05065;Q6AY07	Fructose-bisphosphate aldolase A;Fructose-bisphosphate aldolase	Aldoa;Aldoart2	0.0042621	-0.0533205	ns	0.473933	0.0338384	ns
7176	Q9Z2G3		Acly	0.000791229	0.121439	FDR1%	5.35819e-05	0.143006	FDR1%
456	M0RBF0;A0A0G2JZI0;O88453;A0A0G2JW97	Scaffold attachment factor B1	Safb	0.00365763	-0.067913	ns	0.0127972	-0.0775255	ns
4561	P05370	Glucose-6-phosphate 1-dehydrogenase	G6pdx	0.0710813	0.049647	ns	0.0801081	0.0445298	ns
5433	Q3ZAV8;F7F707	Enhancer of mRNA-decapping protein 4	Edc4	0.000291567	0.0899973	FDR1%	0.839057	-0.0179451	ns
4564	P05712	Ras-related protein Rab-2A	Rab2a	0.601663	-0.00583202	ns	0.0645553	-0.0585469	ns
4565	P05714	Ras-related protein Rab-4A	Rab4a	0.417144	-0.0068059	ns	0.221654	0.0154091	ns
4566	P05982	NAD(P)H dehydrogenase [quinone] 1	Nqo1	0.136033	-0.0216683	ns	0.652476	-0.014748	ns
4088	G3V8C3;P31000;Q6P725;P48675	Vimentin;Desmin	Vim;Des	0.000384566	0.0909627	FDR1%	5.30243e-15	-0.122477	FDR1%
3384	F1LPP6;P24587	A-kinase anchor protein 5	Akap5	8.25724e-13	-0.334224	FDR1%	3.16796e-08	-0.148535	FDR1%
4836	P31399	ATP synthase subunit d, mitochondrial	Atp5h	0.0713328	-0.0300259	ns	0.00026612	-0.0375888	FDR1%
3958	G3V6W6;Q32PW9		Psmc6	1.86921e-05	0.0881334	FDR1%	0.256279	0.0233721	ns
115	A0A0G2JSK5;P49134	Integrin beta-1	Itgb1	0.00052694	0.0899667	FDR1%	0.000527962	-0.0914567	FDR1%
4575	P06762	Heme oxygenase 1	Hmox1	0.881161	0.0733158	ns	0.621259	0.0327576	ns
4578	P07151	Beta-2-microglobulin	B2m	0.443465	0.0589571	ns	0.00393267	-0.148372	ns
4438	O35567	Bifunctional purine biosynthesis protein PURH;Phosphoribosylaminoimidazolecarboxamide formyltransferase;IMP cyclohydrolase	Atic	0.000647081	0.0875618	FDR1%	0.00493279	0.0605298	ns
4391	O08662;A0A140TAJ5;Q78E76	Phosphatidylinositol 4-kinase alpha	Pi4ka	0.927312	-0.000986054	ns	3.95494e-05	-0.0369214	FDR1%
5110	P63039	60 kDa heat shock protein, mitochondrial	Hspd1	0.169658	-0.0179333	ns	0.00219928	-0.0314696	FDR1%
4583	P07335	Creatine kinase B-type	Ckb	0.310457	0.00415153	ns	0.016258	-0.0170026	ns
3221	D4AEH3		Psmd7	0.000220335	0.0856891	FDR1%	0.244621	0.0524474	ns
3907	G3V6D3;P10719;Q0QEP3	ATP synthase subunit beta;ATP synthase subunit beta, mitochondrial	Atp5b	0.694998	-0.0266511	ns	1.34906e-06	-0.0300264	FDR1%
4586	Q6LDS4;P07632;Q6PEC5	Superoxide dismutase [Cu-Zn]	Sod1	0.758572	0.0226241	ns	0.0273974	0.143398	ns
4587	P07633	Propionyl-CoA carboxylase beta chain, mitochondrial	Pccb	0.873254	0.0052852	ns	0.770112	-0.0582868	ns
4714	P15999;F1LP05	ATP synthase subunit alpha, mitochondrial;ATP synthase subunit alpha	Atp5a1	0.0333937	-0.0374149	ns	0.000937308	-0.0289253	FDR1%
4209	G3V9Y1;Q9JLT0;Q62707;Q62706;Q9R0H1;Q62705;P70620	Myosin-10	Myh10	0.121684	0.0312428	ns	3.62257e-05	0.0370897	FDR1%
4592	P07895;C8CHS6	Superoxide dismutase [Mn], mitochondrial	Sod2	0.022244	-0.0460255	ns	0.832517	-0.0389604	ns
4734	Q6IE67;P18422	Proteasome subunit alpha type;Proteasome subunit alpha type-3	Psma3	0.863867	0.00112783	ns	0.00152087	0.0463092	FDR1%
4857	P35284;A0A0G2JYB0;D4A376	Ras-related protein Rab-12	Rab12	0.327216	-0.0174095	ns	8.36006e-05	0.0492381	FDR1%
4339	M0RAP5		Sbf1	0.22501	-0.00495164	ns	0.000209802	0.0537359	FDR1%
3573	F1LXF5		Get4	0.431408	0.0537053	ns	0.000519499	0.0544328	FDR1%
4597	Q5PPP1;P08081-2	Clathrin light chain A	Clta	0.0608913	0.0815416	ns	0.365551	0.047117	ns
4598	P08082;P08082-2	Clathrin light chain B	Cltb	0.432594	-0.0265263	ns	0.00738553	-0.0374809	ns
1694	B5DEN5;Q7TPK5		Eef1b2;Eef1b2l	5.19731e-06	0.0854911	FDR1%	0.0557227	-0.0602771	ns
4600	P08461	Dihydrolipoyllysine-residue acetyltransferase component of pyruvate dehydrogenase complex, mitochondrial	Dlat	0.00956389	-0.040551	ns	0.285395	-0.0265867	ns
4606	Q45QM8;P08753	Guanine nucleotide-binding protein G(k) subunit alpha	Gnai3	0.0258163	0.0451438	ns	0.172275	0.0186653	ns
4783	Q68G44;P22791	Hydroxymethylglutaryl-CoA synthase, mitochondrial	Hmgcs2	0.000837883	-0.101699	FDR1%	0.000184488	-0.137358	FDR1%
4609	P09330;A0A0G2JVA5	Ribose-phosphate pyrophosphokinase 2	Prps2	0.149094	0.0808052	ns	0.144258	-0.0488542	ns
461	A0A0G2JZL4			0.999105	0.0842448	ns	0.117265	0.123357	ns
4430	O35353;Q45QL2;A0A0G2K8M9;D4A752	Guanine nucleotide-binding protein subunit beta-4	Gnb4	0.00625367	0.0510011	ns	0.0019695	0.0590964	FDR1%
4611	P09495;A0A0G2K2G8	Tropomyosin alpha-4 chain	Tpm4	0.557091	0.0581339	ns	0.203548	-0.00775063	ns
4612	P09527;A0A0G2K930	Ras-related protein Rab-7a	Rab7a	0.0993009	0.0483969	ns	0.594953	0.00779477	ns
6680	Q6P7S1;A0A0G2K8T0	Acid ceramidase	Asah1	0.0203846	0.0804519	ns	0.000917984	0.059389	FDR1%
6230	Q63198	Contactin-1	Cntn1	0.63204	0.00552552	ns	1.1765e-10	0.0599692	FDR1%
4617	P09951	Synapsin-1	Syn1	0.129213	-0.107298	ns	0.00702127	0.140177	ns
4621	P0C0A9	Small VCP/p97-interacting protein	Svip	0.00450008	-0.0908838	ns	0.668558	-0.0340587	ns
4626	R9PXW6;P0C643	RAS guanyl-releasing protein 2	Rasgrp2	0.622903	-0.0277624	ns	0.171855	0.0965535	ns
4629	P0C7J6;D4A5B8	Leucine-rich repeat and fibronectin type III domain-containing protein 1	Lrfn1	0.590925	0.0649051	ns	0.451225	-0.0820331	ns
4631	P0CAX5;A0A096MJ43	Oligophrenin-1	Ophn1	NA	NA	NA	0.0433397	0.162837	ns
2718	D4A055-1;D4A055		Cacnb4	0.000103974	-0.144275	FDR1%	1.57206e-06	0.233703	FDR1%
4634	P0DJJ3;F1M1Y0	SH3-containing GRB2-like protein 3-interacting protein 1	Sgip1	0.635246	-0.0473286	ns	0.0914562	0.0527189	ns
4636	P0DMW1;P0DMW0	Heat shock 70 kDa protein 1B;Heat shock 70 kDa protein 1A	Hspa1a	0.589881	0.0196467	ns	0.0322429	-0.0680736	ns
4637	P0DN35			0.707469	-0.00126721	ns	0.349949	-0.0428206	ns
4638	P0DP31;P0DP30;P0DP29;D4ABV5;M0RCJ6;Q304F3		Calm2;Calm3;Tnnc2	0.626719	0.0207614	ns	0.0485877	0.0647866	ns
2165	D3ZI16		Cops6	0.769509	0.0112857	ns	0.00245414	0.0602908	FDR1%
5080	P62828;Q8K586;Q66H11	GTP-binding nuclear protein Ran;GTP-binding nuclear protein Ran, testis-specific isoform	Ran;Rasl2-9;RGD1306195	1.72115e-05	0.120756	FDR1%	8.71349e-07	0.105889	FDR1%
5122	P63100;P63100-2;A0A0H2UHV6;A0A0G2K4H3;P28470	Calcineurin subunit B type 1;Calcineurin subunit B type 2	Ppp3r1;Ppp3r2	1.14445e-05	-0.142639	FDR1%	2.55056e-08	0.130833	FDR1%
4646	P10760	Adenosylhomocysteinase	Ahcy	0.781275	0.0785685	ns	0.585369	0.0825519	ns
4647	P10824	Guanine nucleotide-binding protein G(i) subunit alpha-1	Gnai1	0.0109581	-0.0600803	ns	0.0663789	-0.0477024	ns
2308	D3ZN27		Dnajc13	0.00984487	0.0440309	ns	0.000631515	0.0629058	FDR1%
5380	Q3B7U9	Peptidyl-prolyl cis-trans isomerase FKBP8	Fkbp8	4.08715e-07	-0.112115	FDR1%	2.27414e-08	-0.136187	FDR1%
2001	D3ZD23		Abce1	6.88099e-05	0.116614	FDR1%	0.000269715	0.0789327	FDR1%
4651	P11030;Q6TXF3;Q7TPL2	Acyl-CoA-binding protein;Triakontatetraneuropeptide;Octadecaneuropeptide	Dbi;LOC301444	0.0700563	-0.0630421	ns	0.118358	0.0768317	ns
154	A0A0G2JT63;D3ZX82		Cyfip2	0.00450724	-0.0742975	ns	0.000329188	0.0671543	FDR1%
4759	P19969	Gamma-aminobutyric acid receptor subunit alpha-5	Gabra5	7.7574e-06	-0.158655	FDR1%	0.000332194	-0.133833	FDR1%
7136	Q9WV48-3;Q9WV48;Q9WV48-4;Q9WV48-5	SH3 and multiple ankyrin repeat domains protein 1	Shank1	6.85265e-05	-0.140708	FDR1%	0.000778935	0.0850804	FDR1%
4656	P11348	Dihydropteridine reductase	Qdpr	0.0268659	0.0523616	ns	0.00381753	0.0862866	ns
4386	O08618;Q6AZ40	Phosphoribosyl pyrophosphate synthase-associated protein 2	Prpsap2	0.012645	0.0561143	ns	3.94096e-06	0.0688005	FDR1%
4659	P11505-4;P11505;P11505-6;P11505-3;P11505-5;P11505-2	Plasma membrane calcium-transporting ATPase 1	Atp2b1	0.00232922	-0.0833816	ns	0.456665	0.00214371	ns
6096	Q5XIC6		Psmd12	0.000119434	0.0848847	FDR1%	0.993225	0.0385787	ns
4010	G3V7I3;B5DEX7		Atp13a1	0.000147551	0.0790888	FDR1%	0.183887	-0.0129489	ns
4851	P34058;A0A0G2K793	Heat shock protein HSP 90-beta	Hsp90ab1	4.50298e-08	0.0777521	FDR1%	0.157114	-0.0558109	ns
4632	P0CC10	Leucine-rich repeat-containing protein 4B	Lrrc4b	6.71013e-08	-0.13955	FDR1%	0.000179487	0.126723	FDR1%
4665	P11762	Galectin-1	Lgals1	0.981883	0.0810153	ns	0.00583745	-0.104824	ns
4666	P11884	Aldehyde dehydrogenase, mitochondrial	Aldh2	0.00509303	-0.0851055	ns	0.0193552	-0.0834638	ns
7166	Q9Z1T4;Q9Z1T4-2	Connector enhancer of kinase suppressor of ras 2	Cnksr2	3.24775e-10	-0.244888	FDR1%	4.5288e-05	-0.133161	FDR1%
[truncated: 1,745 more rows]
