# Supplementary material for: Proteome dynamics during homeostatic scaling in cultured neurons
Source: eLife. 2020 Apr 2;9:e52939. doi: 10.7554/eLife.52939 (PMC7117909; doi:10.7554/eLife.52939)
Supplement: Figure 8—source data 1. [file elife-52939-fig8-data1.xlsx]

## Sheet: Sheet1
Figure 8 – Source Data 1: Temporal protein regulation during homeostatic up- and down-scaling.
Protein group ID	Uniprot Identifier	Protein Names	Gene Names	Significant fold changes BIC vs Ctrl [log2]						cluster BIC		Protein group ID	Uniprot Identifier	Protein Names	Gene Names	Significant fold changes BIC vs Ctrl [log2]						cluster BIC
				Nascent proteins (regulated by synthesis)			Pre-existing proteins (regulated by degradation)									Nascent proteins (regulated by synthesis)			Pre-existing proteins (regulated by degradation)
				1d	3d	7d	1d	3d	7d							1d	3d	7d	1d	3d	7d
1001	Q52KS1;A0A0G2KBC7;P47858;Q9Z1I3	ATP-dependent 6-phosphofructokinase;ATP-dependent 6-phosphofructokinase, muscle type	Pfkm	-0.32	-0.43	0	0	0	0.24	37		1330	B0BNL2		LOC364561	0	0	0	0	0.31	0.34	1
1003	Q7TMC7;A0A0G2QC06;Q7TP24;P12346;Q4FZX7	Serotransferrin;Signal recognition particle receptor subunit beta	Tf;Srprb	-0.16	0	0	0	0	0	13		1442	B2CZC8;P31424;P31424-2;A0A0H2UHN1;A0A0H2UHW6	Metabotropic glutamate receptor 5	Grm5	0.17	0	0	0.14	0.2	0.28	1
5228	P97837	Disks large-associated protein 2	Dlgap2	0	-0.95	0	0	0	0	35		1553	B2RYQ2	Serine/threonine-protein phosphatase 2A activator	Ppp2r4	0	0	0	0	0.2	0.33	1
101	A0A0G2JSH2;P29147	D-beta-hydroxybutyrate dehydrogenase, mitochondrial	Bdh1	0	0	0	0	0	-0.06	25		1748	F1M2P8;F1LS98;B5DFC4;P05696	Protein kinase C;Protein kinase C alpha type	Prkca	0	0.13	0.19	0	0.37	0.35	1
1015	A0A0H2UH94;D3ZZL9	GRIP and coiled-coil domain-containing protein 2	Gcc2	0	0	0	0	0	0.3	32		1865	D3Z8P1		Rnf7	0	0	0.15	0	0.22	0.28	1
1017	A0A0H2UHA6;Q9Z142	Transmembrane protein 33	Tmem33	-0.27	-0.09	0	0	0	0.32	37		3525	F1LUT4;A0A0G2KAZ5	Phospholipid-transporting ATPase	Atp8a1	0	0	0	0.14	0.37	0.45	1
3793	F1MA79;A0A0G2KA49;Q9WVC1	Slit homolog 2 protein	Slit2	0	-0.88	0	0	0	0	35		359	A0A0G2JXG3;Q6AY41	Cell cycle control protein 50A	Tmem30a	0	0	0	0.2	0.23	0.4	1
4660	P11506;P11506-14	Plasma membrane calcium-transporting ATPase 2	Atp2b2	0	-0.84	0	0	0	0	35		3876	F8WG91;P37996	ADP-ribosylation factor-like protein 3	Arl3	0	0	0.27	0.16	0.32	0.5	1
1024	A0A0H2UHE5;P20650;Q4V8L2	Protein phosphatase 1A	Ppm1a	-0.15	0	0	0	0	0	13		4639	P10111;A0A0G2K1P0;A0A0G2K2E4;M0RCZ9	Peptidyl-prolyl cis-trans isomerase A;Peptidyl-prolyl cis-trans isomerase A, N-terminally processed;Peptidyl-prolyl cis-trans isomerase	Ppia;RGD1559682	0	0	0.14	0.12	0.2	0.24	1
1026	A0A0H2UHF6;Q9ES40	PRA1 family protein 3	Arl6ip5	-0.25	-0.14	0	0	0	0	13		4730	P18265;A0A0G2K7W7	Glycogen synthase kinase-3 alpha	Gsk3a	0	0	0.2	0	0.22	0.29	1
1030	A0A0H2UHH9;D4ACJ1;P62850-2;P62850-3;P62850;D3ZFZ8	40S ribosomal protein S24	LOC100363469;Rps24;LOC100912267	0	0	0	0	0	0.31	1		4774	P21708;P21708-2	Mitogen-activated protein kinase 3	Mapk3	0	0	0	0	0.32	0.36	1
1032	A0A0H2UHI7;Q505J9	ATPase family AAA domain-containing protein 1	Atad1	-0.28	0	0	0	0	0	13		4833	P31044	Phosphatidylethanolamine-binding protein 1;Hippocampal cholinergic neurostimulating peptide	Pebp1	0	0	0.14	0.14	0.27	0.25	1
1039	A0A0H2UHM0;B5DEN9	Vacuolar protein sorting-associated protein 28 homolog	Vps28	0	0	0	0	0.16	0	10		4887	P39069;A0A0G2K7Q6;M0RC66	Adenylate kinase isoenzyme 1	Ak1	0	0	0	0	0.27	0.34	1
104_m	A0A0G2JSH9;P35704	Peroxiredoxin-2	Prdx2	0	-0.19	-0.09	0.09	0	0	29		4905	P45479	Palmitoyl-protein thioesterase 1	Ppt1	0	0	0	0	0.18	0.35	1
1040	A0A0H2UHM5;P11598	Protein disulfide-isomerase A3	Pdia3	-0.23	0	0	0	0.1	0.18	13		5098	P62963	Profilin-1	Pfn1	0	0	0	0.12	0.24	0.29	1
1043	A0A0H2UHN2;O35760	Isopentenyl-diphosphate Delta-isomerase 1	Idi1	0	0	-0.28	0.16	0	0	28		5133	P63312;CON__P21752	Thymosin beta-10	Tmsb10	0	0	0	0	0.37	0.52	1
5235	P97888;A0A0G2JWY9	Serine/threonine-protein phosphatase 2A 55 kDa regulatory subunit B gamma isoform	Ppp2r2c	0	-0.81	0	0	0	0	35		5134	P63319	Protein kinase C gamma type	Prkcg	0	0	0.04	0.14	0.3	0.21	1
1051	A0A0H2UHQ8;D3ZFA8;P04644;D3ZHU9;D3ZKG6;D3ZM01;M0R8M8;F1M5B1	40S ribosomal protein S17	LOC100364909;Rps17;LOC100361180;RGD1559955;RGD1562381;LOC100365961;LOC102554167	0	0	0	0	0	0.23	32		5199	P85971;G3V8D5	6-phosphogluconolactonase	Pgls	0	0	0.16	0	0.24	0.32	1
1057	A0A0H2UHS7;P12001;Q0QEW8	60S ribosomal protein L18	Rpl18	0	0	0	0	0	0.37	1		5944	Q5RK25	Phosphomannomutase	Pmm1	0	0	0	0.25	0.4	0.45	1
1063	A0A0H2UHU1;P61515;D4AAZ6;D4A7B1;D4A829	Putative 60S ribosomal protein L37a;60S ribosomal protein L37a	Rpl37a-ps1;Rpl37a;LOC679823	0	0	0	0	0	0.27	32		6511	Q6AYB2		Sphk2	0	0	0	0	0.16	0.39	1
2001	D3ZD23		Abce1	0	0	0	0	0.36	0.33	17		6593	Q6IN22;P00787	Cathepsin B;Cathepsin B light chain;Cathepsin B heavy chain	Ctsb	0	0	0	0.25	0.3	0.37	1
5281	Q06000	Lipoprotein lipase	Lpl	0	-0.74	0	0	0	0	35		6930	Q920A6	Retinoid-inducible serine carboxypeptidase	Scpep1	0	0	0	0	0.22	0.32	1
1071	X1WI37;A0A0H2UHX3;P62703	40S ribosomal protein S4, X isoform	LOC100362640;Rps4x	0	0	0.06	0	0	0.39	1		6940	Q923V4	F-box only protein 6	Fbxo6	0	0	0.17	0.21	0.29	0.36	1
1073	A0A0H2UHZ2;Q5U2Z3	Nucleosome assembly protein 1-like 4	Nap1l4	-0.11	-0.14	0	0	0	0.19	15		7097	Q9QYU4;A0A0G2K568	Ketimine reductase mu-crystallin	Crym	0	0	0	0.21	0.38	0.26	1
3184	D4ADE8		Ddx3x	0	-0.69	0	0	0	0	35		7128	Q9WUC4	Copper transport protein ATOX1	Atox1	0	0	0.12	0	0.38	0.4	1
1078	A0A0H2UI09;Q9JM59;D5LL09;Q9JM59-3;Q9JM59-2	Kv channel-interacting protein 2	Kcnip2	0	0	-0.55	0	0	0	14		7176	Q9Z2G3		Acly	0	0	0	0	0.34	0.33	1
1079	A0A0H2UI10;Q8VIJ5;Q8VIJ5-3;Q8VIJ5-2	Protein O-GlcNAcase	Mgea5	0	-0.32	0	0	0	0.28	15		803	A0A0G2K724;Q4G009	Malignant T-cell-amplified sequence 1	Mcts1	0	0	0.15	0	0.28	0.36	1
108	A0A0G2JSJ2;Q4KM73;A0A0G2JTN5	UMP-CMP kinase	Cmpk1	0	0	0	0	0.18	0	10		904	A0A0G2K9A9;D3ZT20		Fbxo41	0	0	0	0	0.31	0.3	1
1080	A0A0H2UI14;Q9QZH7	F-box/LRR-repeat protein 20	Fbxl20	0	0	0	0	0.2	0	10		98	A0A0F7RQL3;P30904;D3ZE63;D4A3P7;F1LTZ6	Macrophage migration inhibitory factor	Mif;LOC679748;RGD1560513;RGD1559921	0	0	0	0.13	0.23	0.31	1
1442	B2CZC8;P31424;P31424-2;A0A0H2UHN1;A0A0H2UHW6	Metabotropic glutamate receptor 5	Grm5	-0.53	-0.41	-0.16	0	0	0	3		3718	F1M7L6;P47868	Secretogranin-3	Scg3	0.94	1.23	1.2	0	1.17	0.92	2
109	A0A0G2JSJ3;A0A0G2JVB0;Q07647;A0A0G2JX37;Q6P506	Solute carrier family 2, facilitated glucose transporter member 3	Slc2a3	0	-0.44	-0.29	0	0	0	33		3961	G3V6X7;Q9QXU9	ProSAAS;KEP;Big SAAS;Little SAAS;Big PEN-LEN;PEN;PEN-20;Little LEN;Big LEN	Pcsk1n	1.36	1.8	0.96	0.51	1.36	1.09	2
1091	B5DFG5;A0A0U1RRT8;A0A0U1RRW2;A0A0U1RRQ5;A0A0U1RS01		Sept6	0	-0.34	-0.23	0	0	0	4		4427	O35314	Secretogranin-1;PE-11;CCB peptide short form;CCB peptide long form	Chgb	1.08	0.8	0.43	0.89	0.84	0.52	2
1095	A0A0U1RRV5;D3ZKG9	Clustered mitochondria protein homolog	Cluh	0	0	0	0	0.34	0	34		4922	P47971;A0A0H2UHC1	Neuronal pentraxin-1	Nptx1	0.97	1.27	1.34	0.39	0.94	1.07	2
1096	A0A0U1RRV7;Q0ZFS8		Srsf3	0	-0.2	0	0	0.2	0	10		6024	Q5U322;D4A8X4		Cpe	1.04	1.23	1.07	0	1.1	0	2
1101	F1LY19;A0A0U1RS25		Upf1	-0.28	-0.17	-0.08	0	0.17	0.29	37		2059	F1LQL1;D3ZEW7;P29476;P29476-3;P29476-2	Nitric oxide synthase;Nitric oxide synthase, brain	Nos1	0	1.24	1.49	0	0.44	0.77	3
1103	O55215;O55211;A0A0U1RVI9;P27952;O55212;D3ZIY7;E9PT76;D3ZQW7;M0RAJ8;O55214;A0A0G2KB28;D3ZT78	40S ribosomal protein S2	Rps2-ps6;Rps2;LOC100359960;Gm8225	0	0	0	0	0	0.33	1		3494	F1LSY2;O35764	Neuronal pentraxin receptor	Nptxr	0.38	1.05	1.27	0.33	0.83	1.08	3
1104	A0A140TA89;P50442	Glycine amidinotransferase, mitochondrial	Gatm	-0.22	0	0	0	0	0	13		3868	F8QYX1;Q9R1B7;Q5PPG5;F8QYX0;P10354	Chromogranin-A;Pancreastatin;Beta-granin;WE-14;Catestatin;GE-25;Serpinin-RRG;Serpinin;p-Glu serpinin precursor	Chga	1.45	0	1.39	0	0	1.62	3
5073	P62749	Hippocalcin-like protein 1	Hpcal1	0	-0.69	0	0	0	0	35		7185	Q9Z2X5;Q6IRH2	Homer protein homolog 3	Homer3	0.65	1.24	1.2	0	0	0.57	3
576	A0A0G2K1Q8;Q5M866		Abca3	-0.31	-0.11	0	0.34	0.47	0	19		4585	P07483	Fatty acid-binding protein, heart	Fabp3	0	-1.33	-1.54	0	0.17	0	4
1111	A0A140TAC3;O88339	Epsin-1	Epn1	-0.24	-0.1	0	0	0	0	13		5276	Q05683	Glutamate decarboxylase 2	Gad2	-0.23	-0.8	-1.46	0.12	0.17	0	4
112	A0A0G2JSJ8;P17164	Tissue alpha-L-fucosidase	Fuca1	0	0.27	0.43	0	0	0	30		4544	P03994;A1A5N6;P03994-2	Hyaluronan and proteoglycan link protein 1	Hapln1	0	-1.32	-2.02	0	0.29	0	4
1129	A0A140TAI6;D3ZZ95;F1M706;D3ZJJ6;D4A1Q0;P39032;A0A0G2K6X1;A0A0G2JUV9	60S ribosomal protein L36	LOC100361060;LOC100360439;LOC100359616;LOC100361644;Rpl36	0	0	0	0	0	0.28	32		4289	M0R7K1;F1LQV9		Lin7a	0	-1.31	-1.14	0	0.3	0	4
3586	F1LYA6;O35823		Abi2	0	-0.66	0	0	0	0	35		3363	F1LP80;P20156;M0RDR2	Neurosecretory protein VGF;VGF(24-63);VGF(180-194);VGF(375-407);Neuroendocrine regulatory peptide-1;Neuroendocrine regulatory peptide-2;TLQP-11;TLQP-21;TLQP-30;TLQP-62;HFHH-10;AQEE-30;LQEQ-19	LOC100909521;Vgf	0	-1.06	-2.21	0.66	0.29	0	4
1136	A0A140UHX6;Q6XDA0		Sptb	0	-0.66	-0.38	-0.21	0	0	33		3367	F1LPB9;P47709;A0A0G2K8B5;P70610	Rabphilin-3A;Double C2-like domain-containing protein beta	Rph3a;Doc2b	-0.32	-0.76	-1.4	0	0.18	0.11	4
4776	P21775;F1LPD6;P21775-2;P07871	3-ketoacyl-CoA thiolase A, peroxisomal;3-ketoacyl-CoA thiolase B, peroxisomal	Acaa1a;Acaa1b	-0.21	-0.1	0	0.12	0.18	0.2	16		6719	Q6QIX3;Q6QIX3-2	Zinc transporter 3	Slc30a3	0	-1.12	-1.68	0	0	0	4
1149	A0A1L5YJQ7;A0A0G2QC41;D3ZVD8		Hdac6	0	0	-0.13	0	0	0	28		5911	Q5PQV5	Trophoblast glycoprotein	Tpbg	0	-0.99	-1.52	0	0	0	4
115	A0A0G2JSK5;P49134	Integrin beta-1	Itgb1	0	0.11	0	0	0.21	0	10		1136	A0A140UHX6;Q6XDA0		Sptb	0	0.23	0.11	0	0.28	0	5
1152	A0A1W2Q5Z6;Q4QQV1	Tax1-binding protein 3	Tax1bp3	0	0	0.25	0	0	0	30		1508	B2RYC9	Glucosylceramidase	Gba	0	0.13	0.16	0	0.18	0	5
6222	Q63128;Q6PLD8	Submitted name: Candidate plasticity protein 2b	cpg2;Cpg2b	-1.21	0	0	0	0	0	26		1731	B5DF55		Stam	0	0.12	0.16	0	0.23	0	5
1168	A0JN25	Microtubule-associated protein	Mapt	0	0	0	0	-0.21	0	25		1923	D3ZAS2		Sgsm1	0	0.24	0	0	0.73	0	5
1169	A0JN29		Lnp	0	0	-0.19	0	0	0	28		1967	D3ZC55		Hspa12a	0	0.11	0.25	0.12	0.19	0	5
4733	P18420	Proteasome subunit alpha type-1	Psma1	-0.18	0	0	0	0	0	13		2135	D3ZH92		Klhl26	0	0.48	0	0	0.43	0	5
1170	A0JN30		Cnpy2	-0.43	0	0	0	0	0	13		305_m	A0A0G2JWA3;F1LQM9;Q5U3Y1		Xpo7	0	0.2	0.36	0	0.15	0	5
1171	A0JPJ7	Obg-like ATPase 1	Ola1	0	-0.32	0	0.2	0.24	0	36		3117	D4ABN3;Q62910-2;Q62910;Q62910-5;Q62910-4;Q62910-3;Q62910-6;F1LZU2	Synaptojanin-1	Synj1;4933427I04Rik	0	0.18	0.31	0	0.18	0	5
118	A0A0G2JSL2;Q69BT7;A0A0G2JX69	Trafficking protein particle complex subunit 4	Trappc4	0	-0.23	-0.19	0	0	0	4		3547	F1LVZ9		Hectd3	0	0.23	0	0	0.24	0	5
3726	F1M7V4;D3Z9C7		Pclo	-0.6	0	-0.27	0	0	0	8		3596	F1LZ81;M0R6K4		Dock4	0	0.21	0.22	0	0.28	0	5
1196	A1L1J8		Rab5b	0	-0.22	-0.09	0	0	0.24	15		3605	F1LZX5		Hectd4	0.21	0.24	0.27	0	0.24	0	5
4684	P13234;Q63082;Q6LED8	Calcium/calmodulin-dependent protein kinase type IV	Camk4	0	-0.64	0	0	0	0	35		3624	F1M0Z3;H1UBM8		Cpne4	-0.2	0.13	0.23	0	0.2	0	5
1209	A2RUW1;C9K104	Toll-interacting protein	Tollip;tollip	-0.21	0	0	0	0	0	13		3670	F1M4A4;Q2P9S1	Kinesin-like protein	Kif1a	0	0.18	0.23	0.32	0.25	0	5
1212	A2VCX1	TIP41-like protein	Tiprl	0	0	0	0	0	0.34	1		3939	G3V6P7;Q62812	Myosin-9	LOC100911597;Myh9	0	0.14	0.12	0	0.12	0	5
1485	B2GV74		Klc2	-0.54	-0.3	-0.2	0	0	0	3		4188	G3V9M3;Q5BJR0		Wdr47	0	0.16	0.25	0	0.21	0	5
2775	D4A1V8		Dzip3	0	-0.63	0	0	0	0	35		4258	M0R5U4		Adcy9	0	0.23	0.3	0	0.28	0	5
1226	F1LNF1;A7VJC2;A7VJC2-4;A7VJC2-2;F1LM82;A7VJC2-3;B2GV69	Heterogeneous nuclear ribonucleoproteins A2/B1	Hnrnpa2b1	-0.29	-0.26	-0.17	-0.06	-0.1	0	20		4456	O54701;O54701-2	Sodium/potassium/calcium exchanger 2	Slc24a2	0	0.29	0.26	0	0.31	0	5
1362	B0VXR5;Q9R237-2;Q9R237;Q9R237-3	C-Jun-amino-terminal kinase-interacting protein 1	Mapk8ip1	-0.99	0	0	0	0	0	26		453	A0A0G2JZH0;D3ZJ77		Cab39	0	0.1	0.15	0.13	0.23	0	5
1232	A8WCF8;A0A0G2K272	Tumor protein p63-regulated gene 1-like protein	Tprg1l	0	-0.26	-0.19	0	0	0	4		4588	P07687;F1LTS8	Epoxide hydrolase 1	Ephx1	0	0.26	0.24	0	0.18	0	5
6944	Q924S1;A0A0G2JWH4	1-acyl-sn-glycerol-3-phosphate acyltransferase delta	Agpat4	-0.19	-0.2	-0.19	0.15	0.2	0.29	16		4595	P08009;A0A0G2K4U2	Glutathione S-transferase Yb-3	Gstm3	0	0.26	0.24	0	0.19	0	5
6724	Q6T487;Q6GMN8		Actn1	0	-0.62	0	0	0	0	35		4745_m	P19490;P19490-2	Glutamate receptor 1	Gria1	0	0.29	0.19	0	0.2	0	5
125	A0A0G2JSM8			0	-0.42	-0.2	0	0	0	4		496	A0A0G2K0B0;Q5XIM5;Q6QI67	Protein CDV3 homolog	Cdv3;LOC499235	0	0.16	0.38	0	0.22	0	5
1252	B0BMV5;P70550	Ras-related protein Rab-8B	Rab8b	0	-0.35	-0.32	0	0	0	4		5672	Q56R18	Importin subunit alpha	Kpna3	0	0.2	0.29	0	0.29	0	5
1254	B0BMW0;P61107;A0A1B0GWR3	Ras-related protein Rab-14	Rab14	-0.36	0	0	0	0.11	0.26	37		5805	Q5I0D7	Xaa-Pro dipeptidase	Pepd	0	0.24	0.26	0	0.22	0	5
1255	B0BMW2;O70351	3-hydroxyacyl-CoA dehydrogenase type-2	Hsd17b10	0	0	-0.16	0	0.07	0	28		6052	Q5XI04		Stom	0	0.18	0.21	0	0.3	0	5
1259	B0BMY7		Twf2	-0.2	-0.31	0	0	0	0	6		6262	Q63564	Synaptic vesicle glycoprotein 2B	Sv2b	0	0.29	0.37	0	0.24	0	5
126	A0A0G2JSN5;Q62897;A0A0G2JSW5;Q62897-3;Q62897-2	Potassium voltage-gated channel subfamily D member 3	Kcnd3	-0.27	0	0	0	0	0	13		6333	Q64542-3;Q64542-2;Q64542-4;Q64542	Plasma membrane calcium-transporting ATPase 4	Atp2b4	0	0.22	0.33	0	0.16	0	5
1264	B0BN06		Bcas3	-0.26	0	0	0	0	0	13		6579	Q6GMN2-2;Q6GMN2	Brain-specific angiogenesis inhibitor 1-associated protein 2	Baiap2	0	0.27	0.33	0	0.26	0	5
5630	Q505J7		Gal3st3	-1.1	-0.74	0	0	0	0	27		7083	Q9QX69	LanC-like protein 1	Lancl1	0	0.23	0.23	0.11	0.16	0	5
2037	D3ZE85	DOMON domain-containing protein FRRS1L	Frrs1l	0	-0.62	0	0	0	0	35		859	A0A0G2K872;Q1WIM3	Cell adhesion molecule 3	Cadm3	0.18	0.29	0.2	0	0.26	0	5
1278	B0BN63		Ahsa1	-0.21	0	-0.12	0	0	0.29	32		1717	B5DF14;F7ESR8		Lgi2	0	0	0	0	-0.83	0	6
6559	Q6AYT7	Monoacylglycerol lipase ABHD12	Abhd12	0	0	0	0	0.34	0.34	17		954	A0A0G2KA25;Q4KLL4	Transmembrane 9 superfamily member 4	Tm9sf4	0	0	0	0	-0.56	0	6
1283	B0BN74;F1LQH9		Bag2	0	-0.37	0	0	0.16	0	36		1062	A0A0H2UHU0;P62853;D4AE10;F1M6F4;M0R763;D3ZCH5	40S ribosomal protein S25	Rps25;RGD1563613;LOC100912210;LOC100911337;LOC100359763	0	0	0	-0.23	-0.26	0	6
1286	B0BN83	Armadillo repeat-containing protein 1	Armc1	-0.27	-0.32	0	0	0	0	6		1103	O55215;O55211;A0A0U1RVI9;P27952;O55212;D3ZIY7;E9PT76;D3ZQW7;M0RAJ8;O55214;A0A0G2KB28;D3ZT78	40S ribosomal protein S2	Rps2-ps6;Rps2;LOC100359960;Gm8225	-0.28	0	0.08	-0.16	-0.35	0	6
1287	B0BN85;Q7TQ12;F1LMY6	Suppressor of G2 allele of SKP1 homolog	Sugt1	-0.43	-0.17	-0.1	0	0	0	6		1104	A0A140TA89;P50442	Glycine amidinotransferase, mitochondrial	Gatm	0	0	-0.13	0	-0.22	0	6
4723	P17220;Q6P9V5	Proteasome subunit alpha type-2;Proteasome subunit alpha type	Psma2	0	0	0	0	0	0.11	32		6217	Q63055	ADP-ribosylation factor-related protein 1	Arfrp1	0	0	0	0	-0.48	0	6
1289	B0BN94	Protein FAM136A	Fam136a	0	0	0	0	0	-0.2	25		1356	B0K031;P05426;B0K023;F1LUE9;Q7TP62	60S ribosomal protein L7	Rpl7;LOC367195	0	0	0.08	-0.09	-0.22	0	6
1293	B0BNA5	Coactosin-like protein	Cotl1	0	0	0.31	0	0	0	30		1455	B2GUY0	Endoplasmic reticulum mannosyl-oligosaccharide 1,2-alpha-mannosidase	Man1b1	0	0	0	0	-0.43	0	6
1294	B0BNA7;M0RCH0	Eukaryotic translation initiation factor 3 subunit I	Eif3i	0	-0.22	0	0	0	0.33	15		1781	B6DTP5;Q6AYI1;O88757		Ddx5;ddx5	0	0	0	0	-0.41	0	6
87	A0A0A0MY31;C7E1V2;F1LNT1;P29994-7;P29994-5;P29994-3;P29994;F1LQX8;P29994-8;P29994-6;P29994-4;P29994-2	Inositol 1,4,5-trisphosphate receptor type 1	Itpr1	0	-0.62	0	0	0	0	35		6060	Q5XI31	GPI transamidase component PIG-S	Pigs	0	0	0	0	-0.41	0	6
1302	B0BNB9		Htra2	0	0	-0.17	0	0	0	28		4660	P11506;P11506-14	Plasma membrane calcium-transporting ATPase 2	Atp2b2	0	0	0	0	-0.4	0	6
658	A0A0G2K3J4;F1LNS0;P0C6C0	A-kinase anchor protein SPHKAP	Sphkap	-0.96	0	0	0	0	0	26		5481	Q4AEF8;A0A0G2K1F3	Coatomer subunit gamma-1	Copg1	0	0	0	0	-0.4	0	6
1306	B0BNE5	S-formylglutathione hydrolase	Esd	0	0	0	0.12	0.17	0.18	32		5449	Q497A2		Slc35b2	0	0	0	0	-0.39	0	6
5370	Q32Q07	Leucine-rich repeat neuronal protein 1	Lrrn1	0	-0.61	0	0	0	0	35		1557	B2RYR8;P62243;M0R7Q5;D3ZIE1;Q6TXJ0	40S ribosomal protein S8	Rps8;LOC100363452;RGD1566369;LOC297756	0	0	0	-0.18	-0.3	0	6
1311	B0BNF5;A0A0G2JUS0;D4A2X0;F1LMH5;A0A0G2JXZ5;Q91XU1	Protein quaking	Qk;LOC100910212;Qki	0	0	0.11	0	0	0	25		1570	B2RYU2;P23358;A0A140TAC5;M0R4B6;D3ZJE2;D4A8N3	60S ribosomal protein L12	Rpl12;Rpl12-ps1;RGD1563956	0	-0.15	0	0	-0.24	-0.19	6
1312	B0BNF6		March5	0	0	-0.18	0	0	0	28		5824	Q5M7T2	SPRY domain-containing protein 7	Spryd7	0	0	0	0	-0.38	0	6
4432	O35431	Amyloid beta A4 precursor protein-binding family A member 2	Apba2	-0.52	0	0	0	0	0.68	16		1363	B1H215		Ncoa4	0	0	0	0	-0.37	0	6
3779	F1M9Q8;Q9EQR2;Q9WUW6	Alkyldihydroxyacetonephosphate synthase, peroxisomal	Agps	0	0	0	0	0.38	0.3	17		1703	F1LT35;D3ZTH8;B5DES1;P62752;A0A0G2JU90;D3ZTX9	60S ribosomal protein L23a	RGD1564606;LOC689899;Rpl23a;RGD1565170	0	0	0	0	-0.32	0	6
1323	B0BNJ1		Sri	0	-0.29	-0.2	0	0	0	4		5233	Q6T5E9;P97886;Q63662;P08430;Q64671;Q91Y43	UDP-glucuronosyltransferase 1-6	Ugt1a1;UGT1;Ugt1a6;UGT1A6	0	0	0	0	-0.32	0	6
1324	B0BNJ4		Ethe1	0	0	-0.21	0	0	0	28		1692	F1LSW7;B5DEM5;Q63507;D3ZHE6	60S ribosomal protein L14	Rpl14;LOC680579	0	0	0	0	-0.31	0	6
1328	B0BNK1		Rab5c	-0.19	0	0	0	0.18	0.22	32		4016	G3V7J2;Q4V8C7	Interferon-inducible double-stranded RNA-dependent protein kinase activator A	Prkra	0	0	0	0	-0.31	0	6
133	A0A0G2JSR1;Q7TP14;A0JPQ9	Chitinase domain-containing protein 1	Chid1	0	-0.13	0	-0.19	0	0	29		2869	D4A4J0		Supt16h	0	0	0	0	-0.29	0	6
159	A0A0G2JT78;F1LVC3		Rab6b	-0.51	-0.31	-0.15	0	0	0	3		2562	D3ZW09;A0A0G2K902		Sorcs2	0	-0.11	0	0	-0.17	0	6
3961	G3V6X7;Q9QXU9	ProSAAS;KEP;Big SAAS;Little SAAS;Big PEN-LEN;PEN;PEN-20;Little LEN;Big LEN	Pcsk1n	-0.92	0	0	-0.71	0	0.42	26		2203	Q642E2;D3ZJD3;D3ZEI0;P17702;A0A0G2K8E0	60S ribosomal protein L28	LOC100362069;RGD1565183;LOC690096;Rpl28	0	0	0	0	-0.28	0	6
234	A0A0G2JUT1;Q6AYP5;Q6AYP5-2		Cadm1	-0.44	-0.37	-0.23	0	0	0	3		4931	P49242;M0R6L4	40S ribosomal protein S3a;40S ribosomal protein S3b	Rps3a;LOC100365839	0	0	0	0	-0.28	0	6
1352	B0K024;G3V7V2;A0A0G2JWU9		Aamp	0	0	0.18	0	0	0.67	5		5631	Q505J8	Phenylalanine--tRNA ligase alpha subunit	Farsa	0	0	0	0	-0.28	0	6
1356	B0K031;P05426;B0K023;F1LUE9;Q7TP62	60S ribosomal protein L7	Rpl7;LOC367195	0	0	0	0.12	0	0.34	1		3134	D4AC36		Eif3f	0	0	-0.1	0	-0.19	0	6
1359	Q5XFV9;B0K038;Q6P3E1;P62250;M0R4I3;M0R8S7;A0A1W2Q631	40S ribosomal protein S16	Rps16;RGD1561137;LOC102548369	0	0	0	0.12	0	0.32	1		5939	Q5RK10;P35427;A0A1W2Q6L2	60S ribosomal protein L13a	Rpl13a	0	0	0	0	-0.28	0	6
5188	P84087	Complexin-2	Cplx2	0	-0.6	0	0	0	0	35		1030	A0A0H2UHH9;D4ACJ1;P62850-2;P62850-3;P62850;D3ZFZ8	40S ribosomal protein S24	LOC100363469;Rps24;LOC100912267	0	0	0	0	-0.27	0	6
2553	D3ZVR7	Prostamide/prostaglandin F synthase	Fam213b	-0.58	-0.43	-0.25	0	0	0	3		3229	D4AEL3		Tmem261	0	0	-0.17	0	-0.18	0	6
3788	F1MA42		Sez6	-0.77	0	0	0	0	0	26		3253	E9PT66;B5DF12		Sf3b3	0	0	0	0	-0.18	-0.24	6
1367	B1H227		Rcc1	0	0	0	0	0	0.13	32		1510	B2RYD7;Q7TQ74		Stt3b	0	0	0	0	-0.27	0	6
6367	Q66H80	Coatomer subunit delta	Arcn1	-0.29	-0.18	0	0	0.25	0.49	16		3420	Q6P790;F1LQS3;P21533;A0A0G2KBA1	60S ribosomal protein L6	Rpl6	0	0	0	-0.14	-0.19	0	6
4258	M0R5U4		Adcy9	0	-0.59	0	0	0	0	35		5081	P62832	60S ribosomal protein L23	Rpl23	0	0	0	0	-0.27	0	6
1376	B1H267	Sorting nexin-5	Snx5	0	0	0.19	0	0	0	25		5054	P62246;D3ZLL8;D3ZS61;A0A0G2JYA6	40S ribosomal protein S15a	Rps15a;LOC691716;LOC100364191	0	0	0	0	-0.26	0	6
1378	Q499V7;F1LPV8;Q68FT4;B1H270;Q5EBA9	Succinyl-CoA ligase subunit beta	Suclg2	0	0	0	0	0.16	0.23	32		2971	D4A771;D3ZZN4;P04646;A0A096P6M4;F1M0T2	60S ribosomal protein L35a	LOC100362049;LOC100362338;Rpl35a	0	0	0	0	-0.25	0	6
7151	Q9Z0G8-2;Q9Z0G8	WAS/WASL-interacting protein family member 3	Wipf3	0	-0.58	0	0	0	0	35		5087	P62890;A0A0G2K5E6	60S ribosomal protein L30	Rpl30	0	0	0	0	-0.25	0	6
1383	B1H2A6;Q8K4F9		Fxr2	0	-0.09	0	0	0	0.5	1		5088	P62907;Q4KM60;D3Z9F6	60S ribosomal protein L10a;Ribosomal protein	Rpl10a;RGD1562962	0	0	0	0	-0.25	0	6
4042	G3V7T8;P97838-2;P97838	Disks large-associated protein 3	Dlgap3	-0.6	-0.39	-0.34	0	0	0	3		7114	Q9R0T3;A0A1W2Q6P6	DnaJ homolog subfamily C member 3	Dnajc3	0	0	0	0	-0.25	0	6
1394	B1WBS4		Vps26b	0	-0.21	0	0	0	0.28	15		808	D3Z8D7;A0A0G2K743;P62856;D3ZJ54	40S ribosomal protein S26	LOC100361854;Rps26;RGD1565117	0	0	0	0	-0.25	0	6
140	A0A0G2JSU4;Q8VBU2-2;A0A0G2JSV0;Q8VBU2	Protein NDRG2	Ndrg2	-0.35	0	0	-0.31	0	0.26	37		457	A0A0G2JZI2;Q6TXE9;Q5I0H2		Eprs	-0.12	-0.08	0	-0.09	-0.13	0	6
3035	D4A8V2		Ccdc177	0	-0.57	0	0	0	0	35		4579	Q6P7A7;P07153	Dolichyl-diphosphooligosaccharide--protein glycosyltransferase subunit 1	Rpn1	0	-0.15	0	0	-0.25	0.13	6
1406	B1WBW9;Q5I0K5	Mycophenolic acid acyl-glucuronide esterase, mitochondrial	Abhd10	0	0	-0.25	0	0	0	28		2413	D3ZRM9;P41123;A0A0G2JYG9;F1M2E9;D3ZD02	60S ribosomal protein L13	LOC100360491;Rpl13;RGD1563145	0	0	0	0	-0.24	0	6
3711	F1M775		Diaph1	0	-0.57	0	0	0	0	35		316	B4F7C9;A0A0G2JWH5		Stt3a	0	0	0	0	-0.24	0	6
1413	B1WC02	CTP synthase	Ctps1	0	-0.2	-0.11	0	0	0.44	15		4688	Q6PDV6;P13471	40S ribosomal protein S14	Rps14	0	0	0	-0.21	-0.22	0	6
1416	B1WC16;Q7TP73;A0A0G2K2S3;A0A0G2K1G0		Bclaf1	-0.33	0	0	0	0	0	13		6941	Q923W4	Hepatoma-derived growth factor-related protein 3	Hdgfrp3	0	0	0	0	-0.24	0	6
4289	M0R7K1;F1LQV9		Lin7a	0	-0.57	0	0	0	0	35		3174	D4AD70;P63174;D3ZW57;D3ZZH2;D4A862	60S ribosomal protein L38	RGD1561636;Rpl38;LOC686066;LOC680353;LOC678816	0	0	0	0	-0.23	0	6
4879	P36972	Adenine phosphoribosyltransferase	Aprt	0	0	0	0	0.22	0.21	17		4665	P11762	Galectin-1	Lgals1	0	0	0	0	-0.23	0	6
1424	B1WC33		Cdc42ep4	0	0	-0.25	0	0	0	28		4997	P56574;A0A0G2JUF6	Isocitrate dehydrogenase [NADP], mitochondrial	Idh2	0	0	-0.11	-0.05	-0.18	0	6
1432	B1WC61;Q7TSP3		Acad9	0	-0.16	-0.13	0	0	0	29		5497	Q4G061	Eukaryotic translation initiation factor 3 subunit B	Eif3b	0	0	0	0	-0.23	0	6
1435	B1WC73		Arl6	0	-0.4	-0.25	0	0	0	4		5059	P62282;Q6PDV9;D3ZYK5	40S ribosomal protein S11	Rps11;RGD1563352	0	0	0	-0.17	-0.34	0	6
4093	G3V8D6;O70277	Tripartite motif-containing protein 3	Trim3	-0.4	-0.52	-0.2	0	0	0	3		594	A0A0G2K249;Q5RKH1	Serine/threonine-protein kinase PRP4 homolog	Prpf4b	0	0	0	0	-0.23	0	6
1443	B2DD29	Serine/threonine-protein kinase BRSK1	Brsk1	0	-0.32	-0.34	0	0	0	4		2710	D4A017		Tmem87a	0	0	0	0	-0.22	0	6
1449	M0R7Z0;B2GUV7;A0A0H2UHV4;Q4FZQ8	Eukaryotic translation initiation factor 5B	Eif5b;Eif5b-ps1	0	0	0	0	0.49	0	34		4758	P19945;D3ZJT4	60S acidic ribosomal protein P0	Rplp0;RGD1564469	0	0	0	0	-0.22	0	6
1452	B2GUX5	5-nucleotidase	Nt5c3a	0	0	0	0	0.2	0	10		5089	P62909	40S ribosomal protein S3	Rps3	0	0	0	-0.17	-0.27	0	6
1456	D4A559;B2GUY4		Dmtn	0	0	-0.38	0	0	0	14		5093	P62919;D4A6W6	60S ribosomal protein L8	Rpl8;RGD1561333	0	0	0	-0.12	-0.32	0	6
1458	M0R851;B2GUZ1	Ubiquitin carboxyl-terminal hydrolase;Ubiquitin carboxyl-terminal hydrolase 4	Usp4	0	0	0	0	0.31	0	10		5129	P63245;A0A0G2JZE6;A0A0G2JY24	Guanine nucleotide-binding protein subunit beta-2-like 1;Guanine nucleotide-binding protein subunit beta-2-like 1, N-terminally processed	Gnb2l1	-0.26	0	0	-0.17	-0.41	0	6
1459	B2GUZ3		Mthfd1l	0	0	-0.3	0	0	0	14		5179	P83732;A0A0H2UH99;M0RBD1	60S ribosomal protein L24	Rpl24;RGD1560821	0	0	0	-0.17	-0.16	0	6
1462	B2GUZ7		Tbcc	0	0	-0.19	0	0	0	28		5190	P84100;F1M5A9	60S ribosomal protein L19	Rpl19;RGD1562420	0	0	0	-0.15	-0.36	0	6
1463	B2GUZ9		Fam49b	0	-0.31	0	0.16	0	0	29		5502	Q4G079		Aimp1	0	0	0	0	-0.22	0	6
1466	B2GV06	Succinyl-CoA:3-ketoacid coenzyme A transferase 1, mitochondrial	Oxct1	-0.22	-0.19	-0.29	0	0	-0.06	20		6082_m	Q5XI81;A0A0G2JWD2	Fragile X mental retardation syndrome-related protein 1	Fxr1	0	0	0	0	-0.22	0	6
1469	B2GV15;Q99PU6		Dbt	0	0	-0.12	0	0	0	28		1523	B2RYI2	Signal recognition particle subunit SRP68	Srp68	0	0	0	0	-0.21	0	6
147	A0A0G2JSZ5;Q63081;D3ZK65	Protein disulfide-isomerase A6	Pdia6;LOC685171	0	-0.13	-0.14	0	0	0	28		3966	G3V6Z3;Q8VH46;A0A0G2JVI5	Actin filament-associated protein 1	Afap1	0	0	0	0	-0.21	0	6
1476	B2GV53		Slc25a32	0.36	0	0	0	0	0	25		4368	M0RCY2;P62278;Q7TP70;F1LMB4	40S ribosomal protein S13	LOC683961;Rps13;Bco2;Tex12	0	0	0	0	-0.2	0	6
4871	P35565	Calnexin	Canx	-0.17	-0.1	0	0	0.21	0.22	16		5575	Q4V7D1;A0A0G2K075;A0A0G2JX79;A0A0G2JXS8;Q7TPJ0	Translocon-associated protein subunit alpha	Ssr1	0	0	-0.11	0	-0.22	0	6
4423	O35274;B1H262	Neurabin-2	Ppp1r9b	-0.56	-0.42	-0.25	0	0	0	3		5618	Q4V8J6		Ythdf1	0	0	0	-0.23	-0.29	0	6
1486	B2GV75;P84850;A0A0A0MXZ3	D-2-hydroxyglutarate dehydrogenase, mitochondrial	D2hgdh	0	0	-0.15	0	0	0	28		6243	Q63413;A0A0G2KAT4	Spliceosome RNA helicase Ddx39b	Ddx39b	0	0	0	0	-0.2	0	6
1487	B2GV79;M0R416;Q8VD52	Pyridoxal phosphate phosphatase	Pdxp	0	-0.31	-0.14	0	0	0	4		7	E9PT29;A0A096MIX2;A0A096MJW9;Q568Z8		Ddx17	0	0	0	0	-0.2	0	6
149	A0A0G2JT06;A0A0G2JW80;P97834	COP9 signalosome complex subunit 1	Gps1	0	0	0	0	0	0.24	32		7074	Q9JMJ4	Pre-mRNA-processing factor 19	Prpf19	0	0	0	0	-0.2	0	6
1490	B2GV87-3;B2GV87-2;B2GV87;P70530;P70529	Receptor-type tyrosine-protein phosphatase epsilon	Ptpre	-0.36	-0.31	0	0	0	0	6		1237	A9CMB7;P15178	Aspartate--tRNA ligase, cytoplasmic	Dars	0	0	0	0	-0.19	0	6
1492	B2GV92;P83868;Q5PQL9	Prostaglandin E synthase 3	Ptges3;Ptges3l1	-0.25	-0.23	0	0	0	0.28	37		6007	Q5U2V8	ER membrane protein complex subunit 3	Emc3	0	0	-0.1	0	-0.22	0	6
1498	B2GVB4;Q9QZR6;Q9QZR6-2;Q9QZR6-3;Q9QZR6-4;F1LN75	Septin-9	Sept9	-0.33	0	0	0	0	0	13		1480	B2GV62		Mrpl20	0	0	0	0	-0.19	0	6
150	A0A0G2JT23;D3ZA69		Nrbp2	0	0	-0.33	0	0	0.3	14		1555	B2RYQ8;P83883	60S ribosomal protein L36a	Rpl36a	0	0	0	0	-0.19	0	6
5265	Q03351-2;Q03351-3;Q03351-4;Q03351;Q68G04;Q03351-8;Q03351-7;Q03351-6;Q03351-5	NT-3 growth factor receptor	Ntrk3	0	-0.57	0	0	0	0	35		6134	Q5XIM7	Lysine--tRNA ligase	Kars	0	0	-0.14	0	-0.19	0	6
1572	B2RYU7		Cbx5	-0.39	0	0	0	0.42	0.46	16		3620	F1M0U5		Nbas	0	0	0	0	-0.19	0	6
1515	B2RYF6		Clptm1	-0.32	0	0	0	0	0.33	37		3981	G3V734;Q64591	2,4-dienoyl-CoA reductase, mitochondrial	Decr1	0	0	0	0	-0.19	0	6
1517	G3V828;B2RYF8		Cnpy3	-0.28	0	0	0	0	0	13		6400	Q66X93;D4A8Y5	Staphylococcal nuclease domain-containing protein 1	Snd1	0	-0.12	0	0	-0.23	0	6
4819	P29066	Beta-arrestin-1	Arrb1	0	0	0	0	0.32	0.49	17		6536	Q6AYK8	Eukaryotic translation initiation factor 3 subunit D	Eif3d	-0.17	0	0	-0.24	-0.17	0	6
1520	B2RYG6	Ubiquitin thioesterase OTUB1	Otub1	-0.26	-0.34	-0.18	0	0.13	0.21	37		6644	Q6P3V9;P50878	60S ribosomal protein L4	Rpl4	-0.19	0	0	-0.12	-0.27	0	6
1523	B2RYI2	Signal recognition particle subunit SRP68	Srp68	0	0	0	0	0	0.4	1		6684	Q6P9U8;D3ZL77	Eukaryotic translation initiation factor 3 subunit H	Eif3h	0	0	0	-0.16	-0.23	0	6
1525	E9PU13;B2RYI6		Snx4	0	0	-0.17	0	0	0	28		6701	Q6PDW1;D3ZHB3;P63324;D3ZV36;D3ZG05	40S ribosomal protein S12	LOC100359593;LOC100360573;Rps12;RGD1561102;LOC100912049	-0.3	0	0	0	-0.3	-0.18	6
1938	D3ZB78		RGD1559864	0	-0.57	0	0	0	0	35		6775	Q76IJ9	ELAV-like protein	Elavl3	0	0	0	0	-0.19	0	6
1531	B2RYJ7		Actr1b	0	0	0	0	0.22	0	10		1051	A0A0H2UHQ8;D3ZFA8;P04644;D3ZHU9;D3ZKG6;D3ZM01;M0R8M8;F1M5B1	40S ribosomal protein S17	LOC100364909;Rps17;LOC100361180;RGD1559955;RGD1562381;LOC100365961;LOC102554167	0	0	0	0	-0.18	0	6
1536	B2RYL4		Armc6	0	0	0	0	0	0.34	1		3362	F1LP76;Q8VHU4	Elongator complex protein 1	Ikbkap	0	0	0	0	-0.17	0	6
154	A0A0G2JT63;D3ZX82		Cyfip2	0	-0.53	-0.41	0	0	0.11	33		2172	D3ZIE9		Aldh18a1	0	0	0	0	-0.16	0	6
3521	F1LUE2;G3V9G3;P08413;Q9Z2F1	Calcium/calmodulin-dependent protein kinase type II subunit beta	Camk2g;Camk2b	0	-0.52	0	0	0	0	36		3967	G3V6Z7;Q3ZU82	Golgin subfamily A member 5	Golga5	0	0	0	0	-0.15	0	6
6622	Q6MG49;A0A0G2K7C1;Q6MG49-2	Large proline-rich protein BAG6	Bag6	0	0	0	0	0.19	0.33	17		3707	F1M6W2;Q6UPR8	Endoplasmic reticulum metallopeptidase 1	Ermp1	0	0	0	0	-0.14	0	6
1545	B2RYN6;Q8R525		Ap1g1	0	-0.24	-0.14	0	0	0	4		811	A0A0G2K757;P25235	Dolichyl-diphosphooligosaccharide--protein glycosyltransferase subunit 2	Rpn2	0	0	-0.12	0	-0.15	0.11	6
2035	D3ZE72	Methionine aminopeptidase 1	Metap1	0	-0.52	0	0	0	0	36		4710	P15650	Long-chain specific acyl-CoA dehydrogenase, mitochondrial	Acadl	0	0	0	0	-0.14	0	6
1553	B2RYQ2	Serine/threonine-protein phosphatase 2A activator	Ppp2r4	-0.31	-0.27	0	0	0	0	6		109	A0A0G2JSJ3;A0A0G2JVB0;Q07647;A0A0G2JX37;Q6P506	Solute carrier family 2, facilitated glucose transporter member 3	Slc2a3	0	0	0	0	0.17	0.15	7
1554	B2RYQ5;A0A0G2KAN5;D4A5C2	Enhancer of rudimentary homolog	Erh;RGD1307595	-0.38	-0.17	0	0	0	0	6		1091	B5DFG5;A0A0U1RRT8;A0A0U1RRW2;A0A0U1RRQ5;A0A0U1RS01		Sept6	0	0	0	0.1	0.2	0.12	7
1555	B2RYQ8;P83883	60S ribosomal protein L36a	Rpl36a	0	0	0.11	0	0	0	25		1145	A0A1E1ERK2;P32851;Q9QXG3	Syntaxin-1A	Stx1a	0	-0.29	0	0	0.21	0.19	7
1557	B2RYR8;P62243;M0R7Q5;D3ZIE1;Q6TXJ0	40S ribosomal protein S8	Rps8;LOC100363452;RGD1566369;LOC297756	0	0	0	0	0	0.29	32		1306	B0BNE5	S-formylglutathione hydrolase	Esd	0	0	0	0	0.26	0.28	7
1559	B2RYS0;P35171	Cytochrome c oxidase subunit 7A2, mitochondrial	Cox7a2	0	0	-0.21	0	0	0	28		1323	B0BNJ1		Sri	0	0	-0.11	0	0.21	0.2	7
1886	D3Z9H2		Hapln4	-0.45	0	-0.62	0	0	0	8		1487	B2GV79;M0R416;Q8VD52	Pyridoxal phosphate phosphatase	Pdxp	0	0	0	0	0.22	0.19	7
1567	B2RYT5;D3ZYX8		Cox7a2l	0	0	0	-0.2	0	0	25		1520	B2RYG6	Ubiquitin thioesterase OTUB1	Otub1	0	0	0	0	0.21	0.17	7
5549	Q4QQT3	CUGBP Elav-like family member 1	Celf1	-0.38	-0.33	-0.15	0	0.34	0.45	16		1663	B4F7C2		Tubb4a	0	-0.16	0.06	0.06	0.14	0.32	7
1578	B2RYW3		Ndufb9	0	0	-0.22	0	0	0	28		1739	B5DF89;A0A0G2JSP3	Cullin-3	Cul3	0	-0.16	0	0	0.2	0.19	7
7101	Q9QYW3	MOB-like protein phocein	Mob4	0	-0.51	0	0	0	0	36		1900	D3ZA31		Mtmr2	0	0	0	0	0.25	0.26	7
3909	G3V6F4;P56558	UDP-N-acetylglucosamine--peptide N-acetylglucosaminyltransferase 110 kDa subunit	Ogt	0	-0.51	0	0	0	0	36		2205	D3ZJF9		Gla	0	0	-0.25	0	0.3	0.2	7
1584	B2RZ09;P0C5H9	Mesencephalic astrocyte-derived neurotrophic factor	Manf	0	0	0	0	-0.17	0	25		2332	D3ZP47		Phpt1	0	0	0	0	0.17	0.22	7
4910	P46933-2;P46933;A0A0G2K3S1	Amyloid beta A4 precursor protein-binding family B member 1	Apbb1	-0.46	-0.33	-0.35	0	0	0	3		251	A0A0G2JV31;O54975	Xaa-Pro aminopeptidase 1;Xaa-Pro aminopeptidase 1, N-terminally processed	Xpnpep1	0	0	0	0	0.16	0.18	7
1593	B2RZ37	Receptor expression-enhancing protein 5	Reep5	-0.24	0	0	0	0	0	13		2550	D3ZVQ0	Ubiquitin carboxyl-terminal hydrolase	Usp5	0	-0.16	0	0	0.16	0.18	7
1597	F7EY92;B2RZ64		Mbd3	0	0	0	0	0	0.42	1		3111	D4ABI6;Q91Y78	Ubiquitin carboxyl-terminal hydrolase;Ubiquitin carboxyl-terminal hydrolase isozyme L3	Uchl3	0	0	0	0	0.22	0.14	7
4402	O08816;F1LSG0	Neural Wiskott-Aldrich syndrome protein	Wasl	0	-0.51	0	0	0	0	36		3350	F1LNT0;Q62951	Dihydropyrimidinase-related protein 4	Dpysl4	0	0	0	0	0.23	0.21	7
1602	B2RZ72		Arpc4	-0.34	-0.46	-0.2	0	0	0.07	9		3489	F1LSR8;Q8CFG5	Voltage-dependent calcium channel subunit alpha-2/delta-3;Voltage-dependent calcium channel subunit alpha-2-3;Voltage-dependent calcium channel subunit delta-3	Cacna2d3	0	0	-0.29	0	0.16	0.25	7
1605	B2RZ79		Iscu	0	0	0	0	0.26	0	10		4050	G3V7W1;G3V7W1-2		Pdcd6	0	0	0	0	0.26	0.21	7
2760	D4A1D3		Sacs	0	-0.5	0	0	0	0	36		4209	G3V9Y1;Q9JLT0;Q62707;Q62706;Q9R0H1;Q62705;P70620	Myosin-10	Myh10	0	0	-0.23	0.08	0.19	0.14	7
1609	B2RZA2;M0R8C5;A0A1B0GWR1		Eri3	0	0	0	0.11	0	0	25		4252	Q5BJ93;M0R5J4;P04764;Q5EB49;A0A0G2K4Y2	Alpha-enolase	Eno1	0	-0.15	0	0.13	0.22	0.23	7
161	A0A0G2JT93;Q9WU82;B6DMG1	Catenin beta-1	Ctnnb1	-0.46	-0.17	0	0	0	0	6		4339	M0RAP5		Sbf1	0	0	0	0	0.16	0.13	7
1611	B2RZA9		Ube2l3	0	0	0	0	0	0.29	32		4371	M0RD40		Sik3	0	0	0	0	0.25	0.25	7
1613	B2RZB5		Chmp2a	0	-0.19	0	0	0.24	0	10		4511	O88767;Q5BKC3	Protein deglycase DJ-1	Park7	0	0	0	0	0.18	0.17	7
162	A0A0G2JTA0;Q5BK32	FAS-associated factor 2	Faf2	0	0	0	0	0	0.14	32		4526	O88989	Malate dehydrogenase, cytoplasmic	Mdh1	0	0	0	0.13	0.25	0.18	7
1624	B2RZD6		Ndufa4	-0.26	-0.22	-0.18	-0.13	0	0	20		4561	P05370	Glucose-6-phosphate 1-dehydrogenase	G6pdx	0	-0.13	0	0.08	0.12	0.26	7
163	A0A0G2JTA1;D3ZHI9		Ppp2r5e	0	0	-0.15	0	0	0.14	28		4582	P07323	Gamma-enolase	Eno2	0	0	0	0.1	0.22	0.21	7
1631	B3DM96;P80201;A0A0G2K2P7	Serine/threonine-protein kinase receptor;Activin receptor type-1	Acvr1	-0.4	0	0	0	0.29	0	19		4594	P07943	Aldose reductase	Akr1b1	0	0	0	0.12	0.25	0.24	7
1632	B3DMA0	Tumor protein p53-inducible protein 11	Tp53i11	0	0	0.27	0	0	0	30		4638	P0DP31;P0DP30;P0DP29;D4ABV5;M0RCJ6;Q304F3		Calm2;Calm3;Tnnc2	0	0	0	0	0.26	0.18	7
1640	B3SVE9;Q64232	Very-long-chain enoyl-CoA reductase	Tecr	0	-0.19	-0.15	0	0.34	0	34		4658	P11497-2;P11497;D3ZRA3;A0A0G2K5G8	Acetyl-CoA carboxylase 1;Biotin carboxylase	Acaca	0	0	0	0.11	0.12	0.29	7
1643	B4F764;Q4KM65	Cleavage and polyadenylation specificity factor subunit 5	Nudt21	-0.38	-0.21	0	0	0	0	6		4661	P11507;P11507-2;Q71UZ2;Q63080	Sarcoplasmic/endoplasmic reticulum calcium ATPase 2	Atp2a2	0	-0.32	-0.14	0.16	0.22	0.36	7
1855	D3Z8D8		Slitrk1	0	-0.49	0	0	0	0	36		4676	P12785	Fatty acid synthase;[Acyl-carrier-protein] S-acetyltransferase;[Acyl-carrier-protein] S-malonyltransferase;3-oxoacyl-[acyl-carrier-protein] synthase;3-oxoacyl-[acyl-carrier-protein] reductase;3-hydroxyacyl-[acyl-carrier-protein] dehydratase;Enoyl-[acyl-carrier-protein] reductase;Oleoyl-[acyl-carrier-protein] hydrolase	Fasn	-0.11	-0.23	0	0.07	0.11	0.24	7
1648	B4F774		Gdap1l1	0	0	-0.22	0	0	0	28		4683	P13221	Aspartate aminotransferase, cytoplasmic	Got1	0	-0.21	0	0.13	0.25	0.2	7
5637	Q561K2;Q8R417;Q62918;C8CB44;A1E5S7	Protein kinase C-binding protein NELL2	Nell2	-0.82	-0.33	0	0	0	0.26	27		4717	P16617;A0A096MJL6	Phosphoglycerate kinase 1	Pgk1	0	0	0	0	0.18	0.23	7
3377	F1LPJ6;Q66H62	Ubiquitin carboxyl-terminal hydrolase CYLD	Cyld	0	-0.48	0	0	0	0	36		4793	Q6P6T6;P24268	Cathepsin D;Cathepsin D 12 kDa light chain;Cathepsin D 9 kDa light chain;Cathepsin D 34 kDa heavy chain;Cathepsin D 30 kDa heavy chain	Ctsd	0	0	0	0.18	0.19	0.25	7
1660	B4F7A9		Csnk2a2	0	0	-0.2	0	0	0.24	32		4896	P41562;Q0QER8;A0A1L1WKG3	Isocitrate dehydrogenase [NADP] cytoplasmic	Idh1	0	-0.14	-0.09	0.14	0.21	0.24	7
411	A0A0G2JYR4;A0A0G2JYI0;F1LZG6;F1M3T7		Lrba	0	-0.6	-0.25	0	0	0.44	24		4906	P45592;M0R6D6	Cofilin-1	Cfl1	0	-0.12	0	0	0.11	0.14	7
1666	B4F7D9;P28570	Transporter;Sodium- and chloride-dependent creatine transporter 1	Slc6a8	0	0	0	0	0.34	0	34		4921	P47942	Dihydropyrimidinase-related protein 2	Dpysl2	0	0	0	0.14	0.25	0.2	7
1667	B4F7E2;P50430;A0JPJ3	Arylsulfatase B	Arsb	0	0	0.27	0	0	0.35	7		4936	P50137	Transketolase	Tkt	0	0	0	0	0.15	0.17	7
7012	Q9ESH6	Glutaredoxin-1	Glrx	0	-0.47	0	0	0	0	36		4975	P54311	Guanine nucleotide-binding protein G(I)/G(S)/G(T) subunit beta-1	Gnb1	0	0	-0.06	0.14	0.3	0.14	7
2174	D3ZII1		Rftn2	0	-0.47	0	0	0	0	36		4976	P54313;Q45QL6;Q91XL4	Guanine nucleotide-binding protein G(I)/G(S)/G(T) subunit beta-2	Gnb2	0	0	-0.08	0.13	0.21	0.11	7
1672	B4F7F3		Arvcf	-0.33	-0.25	0	0	0	0	6		4977	P54319	Phospholipase A-2-activating protein	Plaa	0	-0.11	0.07	0	0.12	0.2	7
1677	B5DEH2	Erlin-2	Erlin2	0	0	0	0.1	0.2	0	10		5006	P59215;Q8R4R4;Q8R4R5	Guanine nucleotide-binding protein G(o) subunit alpha	Gnao1	0	0	0	0	0.16	0.18	7
5332	Q1M168	Caytaxin	Atcay	-0.68	0	0	0	0	0	26		5043	P61972	Nuclear transport factor 2	Nutf2	0	0	0	0	0.19	0.28	7
5526	Q4KM24		Pex11b	0	-0.46	0	0	0	0	36		5105	P63018;M0RCB1;D4A4S3;M0R8M9;F1LZI1	Heat shock cognate 71 kDa protein	Hspa8;LOC102549957;LOC680121	0	-0.1	0	0	0.14	0.18	7
169	A0A0G2JTG7;Q8VHV7;Q8VHV7-2;Q499R8;G3V9Q3;Q8VHV7-3	Heterogeneous nuclear ribonucleoprotein H;Heterogeneous nuclear ribonucleoprotein H, N-terminally processed	Hnrnph1	-0.3	-0.23	0	0	0	0.34	37		5194	P85108	Tubulin beta-2A chain	Tubb2a	0	0	0	0	0.3	0.24	7
1690	B5DEL9;P62083	40S ribosomal protein S7	Rps7	0	0	0	0	0	0.23	32		5229	P97846	Contactin-associated protein 1	Cntnap1	0	-0.19	-0.19	0	0.23	0.37	7
1691	G3V6N2;B5DEM3;A0A0G2K8M5		Tmed4	0	0	0	0	0	0.54	5		5286	Q07009;Q6LBQ2	Calpain-2 catalytic subunit	Capn2	0	0	-0.08	0	0.13	0.22	7
5032	P61265	Syntaxin-1B	Stx1b	-0.42	-0.39	-0.23	0	0	0	3		5414	Q3MIE4	Synaptic vesicle membrane protein VAT-1 homolog	Vat1	0	0	-0.31	0.16	0.21	0.2	7
1694	B5DEN5;Q7TPK5		Eef1b2;Eef1b2l	0	0	0	0	0	0.25	32		5525	Q4KLZ6	Bifunctional ATP-dependent dihydroxyacetone kinase/FAD-AMP lyase (cyclizing);ATP-dependent dihydroxyacetone kinase;FAD-AMP lyase (cyclizing)	Dak	0	0	0	0	0.31	0.17	7
1704	B5DEX3		Cpne8	-0.37	0	0	0	0	0	13		5794	Q5HZV9;R9PXV7	Protein phosphatase 1 regulatory subunit 7	Ppp1r7	0	0	0	0	0.2	0.2	7
2717	D4A053;Q7TP36	Protein Shroom2	Shroom2	0	-0.46	0	0	0	0	36		5962	Q5RKJ9;Q7TQ88;P35281	Ras-related protein Rab-10	Rab10	0	0	0	0	0.11	0.16	7
1722	B5DF41	Syntaphilin	Snph	-0.38	0	0	0	0	0	13		6001	Q5U2U2	Crk-like protein	Crkl	0	0	0	0	0.22	0.28	7
1725	B5DF46	Phosphomannomutase	Pmm2	0	0	0	0	0	0.3	32		6015	Q5U300	Ubiquitin-like modifier-activating enzyme 1	Uba1	0	0	0	0.08	0.15	0.22	7
1728	B5DF50;A0A0G2JU25;D3ZFD2	Polypeptide N-acetylgalactosaminyltransferase	Galnt2	0	0.24	0	0	0	0.49	1		6062	Q5XI34;O35511		Ppp2r1a;PP2A ARa	0	-0.08	0	0.13	0.24	0.19	7
82	A0A0A0MY07;Q9R085;A0A0G2K1U1	Ubiquitin carboxyl-terminal hydrolase;Ubiquitin carboxyl-terminal hydrolase 15	Usp15	0	-0.46	0	0	0	0	36		6077	Q5XI73	Rho GDP-dissociation inhibitor 1	Arhgdia	0	0	-0.13	0.13	0.19	0.22	7
1736	D3ZCH6;B5DF79;A0A0G2K9L0		Rnaset2	0	0	0.83	0	0	0	30		6199_m	Q62876;A0A0G2K3P9;A0A0U1RRP1	Synaptogyrin-1	Syngr1	0	0	-0.22	0	0.21	0.13	7
1739	B5DF89;A0A0G2JSP3	Cullin-3	Cul3	0	-0.2	-0.11	0	0.16	0.18	15		6230	Q63198	Contactin-1	Cntn1	0	-0.21	0	0.11	0.14	0.27	7
4267	M0R6E0	Phospholipid-transporting ATPase	Atp9a	-0.55	-0.3	-0.1	0	0.35	0	19		6314	Q641Z8	Peflin	Pef1	0	0	0	0	0.32	0.21	7
1743	B5DFA2;P0C0R5	Phosphoinositide 3-kinase regulatory subunit 4	Pik3r4	0	-0.24	0	0	0.18	0	29		6663	Q6P6V0	Glucose-6-phosphate isomerase	Gpi	0	0	0	0.14	0.24	0.21	7
1745	B5DFB4;F1LUY5;A0A0G2JXJ6		Ttc7b	0	0	0	0	0	0.23	32		6678	Q6P7Q4	Lactoylglutathione lyase	Glo1	0	0	0	0	0.23	0.17	7
3541	F1LVR4		Camk1d	0	-0.45	0	0	0	0	36		6680	Q6P7S1;A0A0G2K8T0	Acid ceramidase	Asah1	0	0	-0.11	0	0.21	0.16	7
1748	F1M2P8;F1LS98;B5DFC4;P05696	Protein kinase C;Protein kinase C alpha type	Prkca	0	-0.48	-0.2	0	0	0	33		675	A0A0G2K3Z9;Q63716	Peroxiredoxin-1	Prdx1	0	0	0.12	0.1	0.16	0.2	7
1749	B5DFC6;M0RCH5	Glucosamine-6-phosphate isomerase	Gnpda1	0	0	-0.34	0	0	0	14		6996	Q9EQX9;G3V6M7	Ubiquitin-conjugating enzyme E2 N	Ube2n;Ube2t	0	-0.1	0.11	0	0.19	0.23	7
4979	Q99JD5;P54690;Q9R170	Branched-chain-amino-acid aminotransferase;Branched-chain-amino-acid aminotransferase, cytosolic	Bcat1	0	0	0	0	0.21	0.3	17		7136	Q9WV48-3;Q9WV48;Q9WV48-4;Q9WV48-5	SH3 and multiple ankyrin repeat domains protein 1	Shank1	0	0	0	0	0.25	0.25	7
2015	D3ZDJ3		Elmod1	0	-0.45	0	0	0	0	36		7161	Q9Z1E1;Q6P2A7;Q6MG17;Q9Z1E1-2;A0A0G2JU52	Flotillin-1	Flot1	0	0	0	0.12	0.25	0.21	7
1753	B5DFE0;A0A0G2K4N7		Mpp6	-0.31	-0.25	0	0	0	0	6		1004	A1L1J4;A0A0G2QC17;O88483	[Pyruvate dehydrogenase [acetyl-transferring]]-phosphatase 1, mitochondrial	Pdp1	0	0	0	0	0.11	0	8
1755	B5DFF7;G3V9L3;A0A0G2K3I9		Dusp3	0	-0.57	-0.38	0	0.14	0.17	33		105	A0A0G2JSI1;Q9JLJ3	4-trimethylaminobutyraldehyde dehydrogenase	Aldh9a1	0	0	0.11	0	0	0	8
1762	B5DFJ1		Nkiras1	0	0	0	0	0	0.65	5		1063	A0A0H2UHU1;P61515;D4AAZ6;D4A7B1;D4A829	Putative 60S ribosomal protein L37a;60S ribosomal protein L37a	Rpl37a-ps1;Rpl37a;LOC679823	0	0	0	-0.14	0	0	8
1765	B5DFJ4		Vps18	0	-0.14	0	0	0	0.29	15		1168	A0JN25	Microtubule-associated protein	Mapt	0	0	0	0.42	0	0	8
5049	P62138;A0A0G2JYS8	Serine/threonine-protein phosphatase PP1-alpha catalytic subunit	Ppp1ca	-0.48	-0.37	-0.25	0	0	0	3		1188	A1A5R3	KRR1 small subunit processome component	Krr1	0	0	0.11	0	0	0	8
1770	B5DFK6;Q5RK16;Q4FZT4		Ap3d1	-0.19	-0.24	-0.13	0	0	0.1	20		1274	B0BN51;P63164;Q63747;Q5XII7;P17136	Small nuclear ribonucleoprotein-associated protein;Small nuclear ribonucleoprotein-associated protein N;Small nuclear ribonucleoprotein-associated protein B	Snrpb;Snrpn	0	0	0	0	-0.11	0	8
1772	B5DFK8;G3V6B0;A0A0G2K7V9;A0A0G2K8S0;F1M024		Pdxdc1	0	0	0	0	0.52	0	34		1369	B1H234;A0A0H2UHD5	Leucine-rich repeat transmembrane protein FLRT3	Flrt3	0.95	0	0	0	0	0	8
1773	B5DFL0;Q498T0		Snta1	0	0	0.13	-0.18	0	0	25		1405	B1WBW4	Armadillo repeat-containing protein 10	Armc10	0	0	0	0.13	0	0	8
1775	B5DFL9		Sestd1	-0.39	0	0	0	0	0	13		1554	B2RYQ5;A0A0G2KAN5;D4A5C2	Enhancer of rudimentary homolog	Erh;RGD1307595	0	0	-0.08	0	0	0	8
1779	B5DFN3;D3Z949	Ubiquinol-cytochrome-c reductase complex assembly factor 2	Uqcc2;RGD1561671	0	0	-0.19	0	0	0	28		1561	B2RYS2	Cytochrome b-c1 complex subunit 7	LOC685596	0	0	0	0	0	-0.12	8
5074	P62762;Q56A29	Visinin-like protein 1	Vsnl1	-0.44	-0.47	-0.25	0	0	0	3		1603	B2RZ74;D3Z8H0		Snrnp70	0	0	0	-0.17	0	0	8
7189	R9PXT4;Q924I2;A0A0G2JYP2;A0A0G2JVZ8	Mitogen-activated protein kinase kinase kinase kinase;Mitogen-activated protein kinase kinase kinase kinase 3	Map4k3	0	-0.45	0	0	0	0	36		1613	B2RZB5		Chmp2a	0	0	0.11	0	0	0	8
3759	F1M949;Q32Q01		Ckap5	-0.26	-0.22	-0.13	0.1	0.3	0.27	16		1625	B2RZD7	LYR motif-containing protein 9	Lyrm9	0	0	0	0	0	-0.21	8
1782	B6DYP8;Q9JLX3;P04904;A0A0G2JVT2;A0A0G2K8Q5;A0A0G2JTB1;P46418;F7F2H5;Q4FZZ3;B6DYP7;P04903;P00502;Q498T5;Q63232	Glutathione S-transferase;Glutathione S-transferase alpha-3;Glutathione S-transferase alpha-5;Glutathione S-transferase alpha-2;Glutathione S-transferase alpha-1;Glutathione S-transferase alpha-1, N-terminally processed	Gsta1;Gsta3;Gsta5;Gsta2	0	-0.16	0.22	0	0	0	29		1677	B5DEH2	Erlin-2	Erlin2	0	0	0	0	-0.12	0	8
1785	B6DYQ5;Q9Z339;Q6AXR6;A0A096MJ04	Glutathione S-transferase omega-1	Gsto1	0	0	0.13	0	0	0	25		1714	B5DF03;G3V6L9	Peptidyl-prolyl cis-trans isomerase	Fkbp3	0	0	0	0.18	0	0	8
1790	B7X6I3;Q5FVI4	Cell cycle exit and neuronal differentiation protein 1	Cend1	0	-0.37	-0.23	0	0	0	4		1770	B5DFK6;Q5RK16;Q4FZT4		Ap3d1	0	0	0	0	0.08	0	8
1792	C0IXW5;C0IXW6;E9PTY6;A0A096MIW7		Fry	0	0	0	0	0.35	0	34		1905	D3ZA84;D3ZE09;D4A3B0;D3ZT58		Tln2	0	0	0.08	0	0.06	0	8
1793	C0JPT7		Flna	0	0.22	0.25	0	0	0.27	7		1915	D3ZAI6		Nt5dc3	0	0	0	0	0.11	0	8
1797	C6ZII9;B2RZ31		Sirt3	0	-0.35	-0.26	0	0	0	4		198	A0A0G2JTY6;F1LRK4;Q3SYP9		Grsf1	0	0	-0.05	0	0	0	8
1798	C7C5T2;P47860;A0A0A0MXY5	ATP-dependent 6-phosphofructokinase;ATP-dependent 6-phosphofructokinase, platelet type	Pfkp	0	-0.36	0	0	0.12	0.21	15		2015	D3ZDJ3		Elmod1	-0.25	0	0	0	0	0	8
1799	C9E895;P18088;B3VQJ0;Q63211	Glutamate decarboxylase 1	Gad1	0	0	0	0	0	0.25	32		2029	D3ZE17;Q8VHK2	Caskin-1	Caskin1	0	0	0	0	0	-0.08	8
720	A0A0G2K532;D4A1J9	Leucine-rich repeat and fibronectin type-III domain-containing protein 5	Lrfn5	0	-0.44	0	0	0	0	36		2320	D3ZNK1		Mtx3	0	0	0	0	0	-0.21	8
1529	B2RYJ3		Cul4a	0	-0.43	0	0	0	0	36		2336	D3ZPE5;B4F763		Vps53	0	0	0.14	0	0.12	0	8
1853	D3Z8C7;A0A0G2KAW5		Wdr48	0	0	-0.22	0	0	0	28		2421	D3ZS72		Prex1	0	0	0.15	0	0	0	8
5525	Q4KLZ6	Bifunctional ATP-dependent dihydroxyacetone kinase/FAD-AMP lyase (cyclizing);ATP-dependent dihydroxyacetone kinase;FAD-AMP lyase (cyclizing)	Dak	0	-0.43	0	0	0	0	36		2498	D3ZUB0		Rcn1	0	0	0	-0.12	0	0	8
1857	D3Z8E6;A0A0G2K5T1	Calmodulin-regulated spectrin-associated protein 1	Camsap1	-0.29	-0.26	0	0	0	0	6		2553	D3ZVR7	Prostamide/prostaglandin F synthase	Fam213b	0	0	0	0.13	0	0	8
5148	P68511;A0A0G2K2B8	14-3-3 protein eta	Ywhah	-0.57	-0.7	-0.24	0	0.23	0.38	21		2563	D3ZW15		Sec24b	0	0	0.13	0	0	0	8
1865	D3Z8P1		Rnf7	0	-0.16	0	0	0.16	0.21	15		2610	D3ZX42		Rabgap1	0	0	0.1	0	0	0	8
1868	D3Z8R4;F1LT30		Rbm25l1;Rbm25	0	0	0	0.3	0	0	25		2659	D3ZYR4;A0A096MJH1		Sema4d	0	-0.1	0	0	0	0	8
4460	O54861	Sortilin	Sort1	-0.81	-0.41	0	0	0.29	0	27		2661	D3ZYS7		G3bp1	0	0	0	-0.17	0	0	8
4025	G3V7M0;Q4KLK6;B4F783;Q5RK32		Cnot1;RGD1308009	0	0	0	0	0.25	0.43	17		2695	D3ZZN3	Acetyl-coenzyme A synthetase	Acss1	0.23	0.13	0.08	0	0	0	8
5870	Q5MJ12	F-box/LRR-repeat protein 16	Fbxl16	-0.56	-0.43	-0.21	0	0.32	0.3	21		2799	D4A2D7		Ipo4	0	0	0.13	0	0	0	8
1878	D3Z981		Plxna1	0	-0.17	-0.18	0	0	0	4		3133	D4AC23		Cct7	0	-0.09	0.07	0	0	0	8
1881	D3Z9C0		Mios	0	-0.24	0	0	0.16	0	29		3167	D4AD15;D3ZU13;M0RD03		Eif4g1;LOC100911431;LOC100912571	0	-0.07	0	0	0	0	8
6085	Q5XI90		Dynlt3	-0.44	0	-0.18	0	0	0	8		3197	D4AE00	AP-3 complex subunit beta	Ap3b2	0	0	0	0	0.11	0	8
1888	D3Z9I1		Coa3	0	0	0	0	0	0.28	32		3203	D4AE49;Q5BJW0		Skiv2l2	0	0	0	-0.29	0	0	8
1891	D3Z9K9		Gdpd2	0	0	0.22	0	0	0	25		3214	D4AE96		Ipo7	0	0	0.09	0	0	0	8
1892	D3Z9L0		Agk	0	-0.31	-0.31	0	0	0	4		3223	D4AEI5;A0A0G2K402		Myef2	0	0	0	0	-0.11	0	8
4761	P20171;Q8CGQ3	GTPase HRas;GTPase HRas, N-terminally processed	Hras	0	-0.43	0	0	0	0	36		3237	E1AW38;Q02294;O89089;F1LQ87;F1LRE0;Q6XS93;Q6XS92	Voltage-dependent N-type calcium channel subunit alpha-1B	Cacna1b	0	0	0.11	0	0	0	8
1901	D3ZA45	Autophagy-related protein 13	Atg13	0	0	0	0.21	0	0	25		3304	F1LMD9;P97874	Cyclin-G-associated kinase	Gak	0	0	0	0	0.1	0	8
1905	D3ZA84;D3ZE09;D4A3B0;D3ZT58		Tln2	-0.21	-0.19	0	0	0	0	6		3369	F1LPC6;Q9JHW1;A0A0G2JY30;Q9JHW1-2	Carboxypeptidase D	Cpd	0	0	0.15	-0.12	0	0	8
1906	D3ZA85		Nfu1	0	0	-0.16	0	0	0	28		3374	F1LPG3;O88588;O88588-2;I6LL99	Phosphofurin acidic cluster sorting protein 1	Pacs1	0	0	0	0	0	0.1	8
5079	P62824	Ras-related protein Rab-3C	Rab3c	-0.48	-0.49	-0.16	0	0	0	3		3451	F1LRL9;P15205;B0BNK3	Microtubule-associated protein 1B;MAP1B heavy chain;MAP1 light chain LC1	Map1b;Mtap1b	0	0	0	0	0.1	0	8
1909_m	Q63374;Q63374-2;Q63374-3;Q63374-4;Q63374-5;Q63374-6;Q63374-7;Q63374-8;Q63374-9;Q63374-10;D3ZAD6;D3ZTM0	Neurexin-2	Nrxn2	-0.42	-0.23	0	0	0	0	6		3498	F1LT36;P63326;D3ZH53;A0A0H2UI18;D3ZJY5;D3ZCN9	40S ribosomal protein S10	RGD1564698;Rps10;RGD1561871;LOC100360905;RGD1560073	0	0	0	-0.22	0	0	8
1931	D3ZAX5		Cherp	-0.26	0	0	0	0.49	0	19		3798	G3V8Z9;F1MAA2;Q1JU69		Cops7a	0	0	0	0.22	0	0	8
1910	D3ZAF6	ATP synthase subunit f, mitochondrial	Atp5j2	0	0	-0.18	0	0	0	28		3847	Q5U2T0;F7EZZ0;A0A0G2K264		Dap3	0	0	0	0	0	-0.13	8
1914	D3ZAI0;D4A4B4		U2surp	0	0	0	0	0.58	0	34		3872	F8WFH8;Q6P7B0;A0A0G2K673	Tryptophan--tRNA ligase, cytoplasmic;T1-TrpRS;T2-TrpRS	Wars	0	0	0.08	0	0	0	8
5790	Q5HZA9	Transmembrane protein 126A	Tmem126a	-0.48	-0.36	-0.33	0	0	0	3		3881	G3V624;B2RYG0	Coronin	Coro1c	0	0	0	0	0	-0.19	8
1916	D3ZAN3		Ganab	0	0	-0.11	0	0	0.16	32		4004	G3V7G8;Q5I0G4	Glycine--tRNA ligase	Gars	0	0	0.13	0	0	0	8
1918	D3ZAP9	Glycerol-3-phosphate dehydrogenase [NAD(+)]	Gpd1l	0	-0.36	-0.19	0	0	0.13	4		4009	G3V7I0;Q9Z0V6	Thioredoxin-dependent peroxide reductase, mitochondrial	Prdx3	0	0	0	0	0	-0.11	8
5895	Q5PQN0	Neurocalcin-delta	Ncald	-0.52	-0.49	-0.17	0	0	0	3		4034	G3V7Q6;P28075	Proteasome subunit beta type;Proteasome subunit beta type-5	Psmb5	0	-0.11	0	0	0	0	8
1929	D3ZAW2;A0A0G2K0F9;A0A0G2JTF7		Pisd	0	0	-0.28	0	0	0	28		4079	G3V881;Q562A6		Lingo1	-0.21	0	0	0	0	0	8
1740	B5DF91	ELAV-like protein	Elavl1	-0.24	-0.16	-0.14	0	0.32	0	19		4084	G3V8A5;B5DFC1		Vps35	0	-0.09	0	0	0	0.09	8
1933	D3ZAY8		Pnn	0	0	-0.17	0	0	0	28		4137	G3V8U9;P34067	Proteasome subunit beta type;Proteasome subunit beta type-4	Psmb4	0	-0.09	0	0	0.1	0	8
1934	D3ZAZ0	Eukaryotic translation initiation factor 3 subunit M	Eif3m	0	0	0	0	0	0.19	32		4156	G3V928;Q5I0H1		Lrp1	0	0	-0.03	0	0	0.1	8
4268	M0R6E6		Safb2	0	-0.43	0	0	0	0	36		4182	G3V9I9;Q9JKL7	Splicing regulatory glutamine/lysine-rich protein 1	Srek1	-0.33	0	0	0	0	0	8
1944	D3ZBE5;A0A0G2JUP0	Serine/threonine-protein kinase Nek7	Nek7	0	0	0	0	0	0.42	1		4202	G3V9U2;A0A0G2K642;P13437	3-ketoacyl-CoA thiolase, mitochondrial	Acaa2	0	0	0	0	-0.12	0	8
1947	D3ZBL5;Q62784-2;Q62784	Type I inositol 3,4-bisphosphate 4-phosphatase	Inpp4a	0	-0.3	0	0	0	0.3	15		423	A0A0G2JYU6			0.48	0	0	0	0	0	8
5060	P62329	Thymosin beta-4;Hematopoietic system regulatory peptide	Tmsb4x	0	-0.43	0	0	0	0	36		4256	M0R5T4		Rac3	0	0	0	0.18	0	0	8
1951	D3ZBN0	Histone H1.5	Hist1h1b	-0.17	0	0	0	0	0	13		4282	M0R776;A0A0G2JZC3		Mrps36	0	0	0	0	0	-0.21	8
6721	Q6RJR6	Reticulon-3	Rtn3	-0.43	-0.42	-0.25	0	0	0	3		4386	O08618;Q6AZ40	Phosphoribosyl pyrophosphate synthase-associated protein 2	Prpsap2	0	0	0	0.1	0	0	8
1967	D3ZC55		Hspa12a	0	-0.39	-0.12	0	0	0.14	36		4450	O35889	Afadin	Mllt4	0	0	0	0	0.04	0	8
4731	P18395	Cold shock domain-containing protein E1	Csde1	-0.32	-0.24	0	0	0.38	0.56	16		4463	O54924	Exocyst complex component 8	Exoc8	0	0	0	0	0.08	0	8
1974	D3ZCA0		Prosc	0	-0.17	-0.16	0	0.14	0	4		4478	O70257;M0R930;A0A0G2K6Y9	Syntaxin-7	Stx7;LOC100910446	0	0	0	0.07	0.07	0	8
1977	D3ZXD2;D3ZCF8		Abca8a	0	0	0	0	0	0.32	1		451	A0A0G2JZF6			0	0	0	0	0	-0.17	8
5066	P62630;M0R757;F1M6C2	Elongation factor 1-alpha 1;Elongation factor 1-alpha	Eef1a1;LOC100360413;LOC100360150	0	0	0	0.16	0.31	0.66	11		454	A0A0G2JZH8;Q5BJX2;Q7TQ85		Pdhx	0	-0.08	0	0	0	0	8
1979	D3ZCG3;D3ZKH2		Mon2	0	0	-0.23	0	0.26	0.36	17		4556	Q45QN0;P04897;Q5EEY4;Q5EEY3	Guanine nucleotide-binding protein G(i) subunit alpha-2	Gnai2	0	0	0	0	0	0.12	8
733	A0A0G2K5C6;G3V7U2;Q63330		Map1a	-0.44	0	-0.19	0	0	0	8		4651	P11030;Q6TXF3;Q7TPL2	Acyl-CoA-binding protein;Triakontatetraneuropeptide;Octadecaneuropeptide	Dbi;LOC301444	0	0	0	0.17	0	0	8
5723	Q5CD99;A0A096MIV6;A0A096MJF8	Polypeptide N-acetylgalactosaminyltransferase	Wbscr17	0	-0.43	0	0	0	0	36		4659	P11505-4;P11505;P11505-6;P11505-3;P11505-5;P11505-2	Plasma membrane calcium-transporting ATPase 1	Atp2b1	0	-0.1	0	0	0.05	0	8
6884	Q8K4Y5	Leucine-rich glioma-inactivated protein 1	Lgi1	-0.6	-0.53	-0.32	0	0	0	3		4692	P13852	Major prion protein	Prnp	0.36	0	0	0	0	0	8
1994	D3ZCV0		Actn2	-0.47	-0.68	-0.34	0	-0.26	-0.26	18		4727	P17764	Acetyl-CoA acetyltransferase, mitochondrial	Acat1	0	0	0	0	0	-0.08	8
1997	D3ZCZ9;P52504	NADH dehydrogenase [ubiquinone] iron-sulfur protein 6, mitochondrial	LOC100912599;Ndufs6	0	0	-0.21	0	0	0	28		4735	P18484;A0A0G2K943	AP-2 complex subunit alpha-2	Ap2a2	0	0	0.07	0	0	0	8
1999	D3ZD09;D3ZSB0		Cox6b1	-0.26	-0.2	-0.21	-0.23	0	0	20		4772	P21670;Q6P505	Proteasome subunit alpha type-4;Proteasome subunit alpha type	Psma4	0	0	0	0	0.1	0	8
1066	A0A0H2UHV9;D4ABY2	Coatomer subunit gamma-2	Copg2	0	0	0	0	0.26	0.46	17		4815	P28480;A0A096MJA0	T-complex protein 1 subunit alpha	Tcp1	0	0	0.08	0	0	0	8
6647	Q6P503		Atp6v1d	0	-0.42	0	0	0	0	36		4818	P28841	Neuroendocrine convertase 2	Pcsk2	0	0	0	0.39	0	0	8
2004	D3ZD73		Ddx6	0	0	0	0	0.33	0.48	17		4828	P30009;F1LMW7	Myristoylated alanine-rich C-kinase substrate	Marcks	0	0	0	0	0.08	0	8
2008	D3ZD89;M0RC73		Naa15;Naa16	0	0	0	0	0	0.67	5		4843	P32198	Carnitine O-palmitoyltransferase 1, liver isoform	Cpt1a	0	0.14	0.1	0	0	0	8
6998	Q9ER24	Ataxin-10	Atxn10	-0.12	0	0	0.4	0.68	0.65	11		4855	P35213-2;P35213	14-3-3 protein beta/alpha;14-3-3 protein beta/alpha, N-terminally processed	Ywhab	0	-0.08	0	0	0.05	0	8
201	A0A0G2JU11;F1M386;A0A0A0MP77	Rap guanine nucleotide exchange factor 2	Rapgef2	0	-0.29	-0.28	0	0	0	4		4890	P40329	Arginine--tRNA ligase, cytoplasmic	Rars	0	0	0.09	0	0	0.11	8
2010	D3ZDC0;F1LPZ8;Q62889-2;Q62889-4;Q62889-3;Q62889;A0A096MK63	Neuroligin-3	Nlgn3	-0.47	-0.36	-0.24	-0.18	0	0	3		4957	P51907	Excitatory amino acid transporter 3	Slc1a1	0	0	0	-0.22	0	0	8
2013	D3ZDH8;Q9JJM9-2	Septin-5	Sept5	0	-0.81	-0.63	0	0	0	2		4971	P53812;P53812-2;D3ZCD4	Phosphatidylinositol transfer protein beta isoform	Pitpnb	0	0	0	0.15	0	0	8
1131	A0A140TAJ1;P30337	N-chimaerin	Chn1	0	-0.42	0	0	0	0	36		5031	P61227	Ras-related protein Rap-2b	Rap2b	0	0	0	0	0.09	0	8
2025	D3ZDX5		Plxnb1	0	0	0	0	0	0.2	32		5049	P62138;A0A0G2JYS8	Serine/threonine-protein phosphatase PP1-alpha catalytic subunit	Ppp1ca	0	0	0.11	0	0	0	8
2029	D3ZE17;Q8VHK2	Caskin-1	Caskin1	-0.26	-0.31	0	0	0	0	6		5050	P62142;Q63682	Serine/threonine-protein phosphatase PP1-beta catalytic subunit	Ppp1cb	0	0	0.09	0	0	0	8
2031	F1LVA8;D3ZE30;Q63767-2;Q63767	Breast cancer anti-estrogen resistance protein 1	Bcar1	0	0	0	0	0.2	0	10		5056	P62260	14-3-3 protein epsilon	Ywhae	0	0	0	0	0.11	0	8
3004	F1LQI4;D4A7Y1;P07897;P07897-2	Aggrecan core protein	Acan	0.86	0	0	0.34	0	0	31		5058	P62275	40S ribosomal protein S29	Rps29	0	0	0	-0.2	0	0	8
6539	Q6AYM4;Q6AYM4-2	Protein DPCD	Dpcd	0	-0.42	0	0	0	0	36		5065	P62628	Dynein light chain roadblock-type 1	Dynlrb1	0	-0.09	0	0	0	0	8
6365	Q66H63	Ganglioside-induced differentiation-associated-protein 2	Gdap2	0	-0.42	0	0	0	0	36		5086	P62870;A0A140TA99;F1LZ51;F1M937;A0JN07;M0R6V0;D3ZYC5	Transcription elongation factor B polypeptide 2	Tceb2;RGD1565653;LOC684822	0	0	0	0	0.1	0	8
1305	B0BNE3		Trappc5	-0.58	0	-0.16	0	0	0.36	26		5090	P62912;D4A412;D4A647	60S ribosomal protein L32	Rpl32;LOC688684;Gm21893	0	0	0	-0.13	0	0	8
2047	D3ZEI4		Hepacam	-0.21	0	0	0	0	0	13		5181	P83941;A0A0G2K2A0;A0A096MIY6	Transcription elongation factor B polypeptide 1	Tceb1	0	0	0.15	0	0	0	8
4876	P36506	Dual specificity mitogen-activated protein kinase kinase 2	Map2k2	0	-0.42	0	0	0	0	36		5218	P97612	Fatty-acid amide hydrolase 1	Faah	0	0.14	0	0	0	0	8
2056	D3ZER6		Tnpo2	0	0	0	0	0.32	0	34		524	A0A0G2K0Q7;D3ZFU9		Mylk	-0.15	0	0	0	0	0	8
2057	D3ZES2		Trappc6b	0	0	-0.13	0	0	0	28		5259	Q02874;A0A140TAB4;Q02874-2	Core histone macro-H2A.1	H2afy	0	-0.09	0	0	0	0	8
6954	Q99JD4	CLIP-associating protein 2	Clasp2	-0.6	-0.53	-0.29	0	0	0	3		5334	Q1RP74;Q1W1V7		LOC100911774;Tbcb	0	0	0	0	0.1	0	8
2068	D3ZF26		Tnks1bp1	0	-0.53	-0.16	0	0	0	33		5394	Q3KR59	Ubiquitin carboxyl-terminal hydrolase 10	Usp10	-0.34	0	0	0	0	0	8
2072	D3ZF54	Anoctamin	Ano10	-0.21	0	0	0	0	0	13		5460	Q498N3;Q9QUR2-2;Q9QUR2	Dynactin subunit 4	Dctn4	0	0	0	0.12	0	0	8
2073	D3ZF86		Arfgef3	0	-0.36	0	0	0	0.44	15		5469	Q499N5	Acyl-CoA synthetase family member 2, mitochondrial	Acsf2	0	0	0	0	0	-0.21	8
2074	D3ZF92	Tumor necrosis factor receptor superfamily member 21	Tnfrsf21	0	0	-0.32	0	0	0	14		5486	Q4FZT8	SPRY domain-containing protein 4	Spryd4	0	0	0	0	0	-0.14	8
2075	D3ZF97		Erlec1	-0.41	0	0	0	0	0.29	37		5536	Q4KM74	Vesicle-trafficking protein SEC22b	Sec22b	0	0	0.14	0	0	0	8
2078	D3ZFB6	Proline-rich transmembrane protein 2	Prrt2	0	0	-0.33	0	0	0	14		554	A0A0G2K1C0;Q4V7C7;Q9ERF9	Actin-related protein 3	Actr3	0	0	0	0.09	0	0	8
2088	D3ZFQ1		Atxn7l3b	0	0	0	0	0	0.47	1		5568	Q4V7A0;A0A0G2K648	WD repeat-containing protein 61;WD repeat-containing protein 61, N-terminally processed	Wdr61	0	0	0.15	0	0	0	8
1237	A9CMB7;P15178	Aspartate--tRNA ligase, cytoplasmic	Dars	-0.22	0	0	0	0.17	0.38	16		5607	Q4V8E2		Psmd14	0	0	0.08	0.08	0	0	8
859	A0A0G2K872;Q1WIM3	Cell adhesion molecule 3	Cadm3	-0.58	-0.44	-0.2	0	0	0	3		561	A0A0G2K1G8;D3ZSU3		Slc7a14	0	0	0	0.22	0	0	8
2092	D3ZFR9		Rdh13	0	-0.25	-0.16	0	0	0	4		562	A0A0G2K1H2;P22831	Synaptoporin	Synpr	0	0	0	0	0.09	0	8
2094	D3ZFS7;B2RYW5		Lyplal1	0	0	-0.26	0	0	0	28		584	A0A0G2K1W1			0	0	0	-0.38	0	0	8
2096	D4A404;D3ZFY7;D4A2Q3		Psd3	0	0	-0.7	0	0	0	14		5915	Q5PQZ9	NADH dehydrogenase [ubiquinone] 1 subunit C2	Ndufc2	0	0	0	0	0	-0.21	8
2101	D3ZG43		Ndufs3	0	0	-0.21	0	0	0	28		5955	Q5RKI0	WD repeat-containing protein 1	Wdr1	0	0	0	0.07	0	0	8
2108	D3ZG95;Q5BJV0		Micu3	0	0	-0.3	0	0	0	14		5967	Q5U1X1;A0A0G2K038	Oligoribonuclease, mitochondrial	Rexo2	0	0	0.16	0	0.08	0	8
2111	D3ZGE6;Q66HL2;A0A0G2JZ13;A0A1B0GWS4;O70420;O70419	Src substrate cortactin	Cttn	-0.27	-0.28	0	-0.09	-0.15	0	6		5976	Q5U211;B0BMY2	Sorting nexin-3	Snx3;LOC684097	0	-0.08	0	0	0	0	8
2113	M0RAH9;F1M2C7;D3ZGJ1;M0R3U3;M0R8H3;M0R5N5		Ildr2	0	0	-0.4	0	0	0	14		5997	Q5U2S7		Psmd3	0	-0.11	0	0	0	0	8
5051	P62168	Neuronal calcium sensor 1	Ncs1	0	-0.42	0	0	0	0	36		601	M0R961;A0A0G2K2B3;Q99PF5	Far upstream element-binding protein 2	Khsrp	0	0	0	0	-0.12	0	8
6007	Q5U2V8	ER membrane protein complex subunit 3	Emc3	-0.2	-0.17	0	0	0.43	0	19		6042	Q5XFW8	Protein SEC13 homolog	Sec13	0	0	0.15	0	0	0	8
2128	D3ZH36		Elfn2	0	-0.48	-0.19	0	0	0	33		6095	Q5XIC2	Evolutionarily conserved signaling intermediate in Toll pathway, mitochondrial	Ecsit	-0.18	0	0	0	0	0	8
213	A0A0G2JUC7;Q6AYH5	Dynactin subunit 2	Dctn2	0	-0.17	0	0	0.18	0.26	15		6133	Q5XIM4	ATP synthase subunit s, mitochondrial	Atp5s	0	0	0	0	0	-0.18	8
2131	D3ZH41		Ckap4	0	0	0.1	0	0	0.19	32		6135	Q5XIM9	T-complex protein 1 subunit beta	Cct2	0	0	0.05	0	0	0	8
2144	D3ZHI8;A0A0G2K1K5		Trappc11	0	-0.21	0	0	0	0.31	15		6165	Q62651	Delta(3,5)-Delta(2,4)-dienoyl-CoA isomerase, mitochondrial	Ech1	0	0	0	0	-0.09	-0.19	8
7	E9PT29;A0A096MIX2;A0A096MJW9;Q568Z8		Ddx17	-0.26	-0.18	0	0	0.29	0.43	16		6227	Q63155;F1LRN5;Q63153	Netrin receptor DCC	Dcc;DCC	0	0	0.15	0	0	0	8
1781	B6DTP5;Q6AYI1;O88757		Ddx5;ddx5	-0.49	-0.16	0	0	0.43	0.35	16		6263	Q63569;Q6P6U2	26S protease regulatory subunit 6A	Psmc3	0	0	0.07	0	0	0	8
2162	D3ZHY9		Rasal1	0	0	-0.47	0	0	0	14		6265	Q63584	Transmembrane emp24 domain-containing protein 10	Tmed10	0	0	0	0	-0.1	0	8
3426	F1LQZ3;A0A0G2JUD6;Q9WV62;Q2P9S3	Kinesin-like protein	Kif3a	-0.42	-0.4	0	0.21	0	0	6		6343	Q64620	Serine/threonine-protein phosphatase 6 catalytic subunit;Serine/threonine-protein phosphatase 6 catalytic subunit, N-terminally processed	Ppp6c	0	0	0	0	0.08	0	8
2165	D3ZI16		Cops6	0	-0.19	-0.15	0	0.12	0.12	4		6407	Q68FQ0;Q6B436	T-complex protein 1 subunit epsilon	Cct5	0	0	0.08	0	0	0	8
2168	D3ZI68		Prpf31	0	0	0	0	0.4	0	34		6638	Q6NX65	Programmed cell death protein 10	Pdcd10	0	0	0	0	0	0.09	8
217	D4A060;A0A0G2JUF2		Snx30	0	0	-0.28	0	0	0	28		6646	Q6P502	T-complex protein 1 subunit gamma	Cct3	0	0	0.09	0	0	0	8
2172	D3ZIE9		Aldh18a1	0	0	0	0.13	0.15	0	10		6668	Q6P767	Pituitary tumor-transforming gene 1 protein-interacting protein	Pttg1ip	0	0	0	0.37	0	0	8
2173	D3ZIF0		Zfp512	0	-0.21	-0.33	0	0	0	4		6670	Q6P791	Ragulator complex protein LAMTOR1	Lamtor1	0	0	0.14	0	0	0	8
5289	Q07310-3;Q07310-17;Q07310;Q07310-19;Q07310-18;Q07310-8;Q07310-6;Q07310-5;Q07310-4;Q07310-2;Q07310-14;Q07310-13;Q07310-12;Q07310-11;Q07310-16;Q07310-15;Q07310-10;Q07310-9	Neurexin-3	Nrxn3	0	-0.42	0	0	0	0	36		6700	Q6PDV8;P47198	60S ribosomal protein L22	Rpl22	0	0	0	-0.11	0	0	8
219	A0A0G2JUG7			-0.33	-0.32	0	0	0	0	6		6705	Q6PEC1;F1M825	Tubulin-specific chaperone A	Tbca	0	0	0.15	0	0	0	8
5403	Q3KRE8	Tubulin beta-2B chain	Tubb2b	0	-0.42	0	0	0	0	36		6767	Q75Q41	Mitochondrial import receptor subunit TOM22 homolog	Tomm22	0	-0.11	0	0	0	0	8
2203	Q642E2;D3ZJD3;D3ZEI0;P17702;A0A0G2K8E0	60S ribosomal protein L28	LOC100362069;RGD1565183;LOC690096;Rpl28	0	0	0	0	0	0.28	32		69	A0A097BVJ5;P13233	2,3-cyclic-nucleotide 3-phosphodiesterase	Cnp	0	0.15	0	0	-0.06	0	8
6198	Q6AZ35;Q62871-2;D3ZU74;G3V9V3;Q62871-3;Q62871	Cytoplasmic dynein 1 intermediate chain 2	Dync1i2	0	0	0	0	0.16	0.31	17		6922	Q91Y81	Septin-2	Sept2	0	0	0	0	0.1	0	8
7299	Z4YNP1		Celf2	-0.57	0	0	0	0	0	26		6975	Q99PD4;D3ZXP7;Q6PCU9;A0A096MJQ1	Actin-related protein 2/3 complex subunit 1A	Arpc1a	0	0	0	0	0.11	0	8
2208	D3ZJH2		Sugp2	0	-0.39	-0.26	0	0	0	4		7006	Q9ES53	Ubiquitin fusion degradation protein 1 homolog	Ufd1l	0	0.1	0	0	0	0	8
221	A0A0G2JUH8;D3ZCH3		Snx13	0	0	0	0	0.38	0.13	34		7022	Q9JHL4-3;Q9JHL4-2;Q9JHL4;Q9JHL4-4	Drebrin-like protein	Dbnl	0	0	0	0	0.07	0	8
2214	D3ZJR6		Smcr8	0	0	-0.28	0	0	0	28		7028	Q9JHZ4;Q9JHZ4-2	GRIP1-associated protein 1	Gripap1	0	0	0	0	0.09	0	8
2231	D3ZKE1		Uvrag	0	0	0	0	0	0.38	1		7123	Q9WTT7	Basic leucine zipper and W2 domain-containing protein 2	Bzw2	0	0	0.12	0	0	0	8
2233	D3ZKG1		Mut	0	0	-0.18	0	0	0	28		7297	W0T3G7;D4A4L4		Map7d2	0	0	0	0.21	0	0	8
224	A0A0G2JUJ9;D4A2Z6		Sec63	0	0	0	0	0.49	0	34		826	A0A0G2K7K2;Q9JM53;Q924M6	Apoptosis-inducing factor 1, mitochondrial	Aifm1	0	0	0	0	0	-0.2	8
2240	Q9ERS3;D3ZKP9;Q8CFG7;A0A0G2K7E5;Q8VHS9;P54290;A0A0G2K8L7	Voltage-dependent calcium channel subunit alpha-2/delta-1;Voltage-dependent calcium channel subunit alpha-2-1;Voltage-dependent calcium channel subunit delta-1	Cacna2d1	0	-0.33	-0.1	0	0	0	36		871	A0A0G2K8H0;Q5M9G3	Caprin-1	Caprin1	0	0	0	-0.26	0	0	8
761	A0A0G2K624;A0A0H2UI28;P23363;Q99NV7;C8CEB1	Brain-derived neurotrophic factor	Bdnf	1.61	0.66	0.44	0	0	0	31		956	A0A0G2KA50;E9PT04;Q5PQS9		Vps39	0	0.13	0	0	0	0	8
2254	D3ZL50		Ttc37	0	0	-0.13	0.15	0	0.24	32		973	A0A0G2KAL9			0	0	0	0.17	0	0	8
2265	D3ZLK9;D4AAT7	ATP-dependent (S)-NAD(P)H-hydrate dehydratase	Carkd	0	0	-0.1	0	0	0	28		4718	P16970	ATP-binding cassette sub-family D member 3	Abcd3	0	0	0	0	0	0.4	31
2280	D3ZM09		Sars2	0	0	0	0	0.13	0	10		5201	P86173;A0A0G2JW70	Actin-like protein 6B	Actl6b	0	0	0	0	0	0.37	9
2281	D3ZM21		Comtd1	0	0	-0.48	0	0	0	14		2957	D4A6X4	Acylphosphatase	Acyp1	0	0	0	0	0	0.3	9
2296	D3ZMP6		Nop10	0	0	0.14	0	0	0	25		5256	Q02589	[Protein ADP-ribosylarginine] hydrolase	Adprh	0	0	0	0	0	0.31	9
2300	D3ZMS0		LOC100911713	-0.23	0	0	0	0	0	13		1413	B1WC02	CTP synthase	Ctps1	-0.27	-0.17	0.16	0	-0.1	0.29	9
2305	D3ZMY7		Nt5c2	0	0	0	0	0.2	0	10		3779	F1M9Q8;Q9EQR2;Q9WUW6	Alkyldihydroxyacetonephosphate synthase, peroxisomal	Agps	0	0	0	0	0	0.39	9
2308	D3ZN27		Dnajc13	0	0	0	0	0.14	0.2	32		1435	B1WC73		Arl6	0	0	0.11	0	0	0.27	9
4225	M0R3M4;D4A054		Ranbp2	-0.11	-0.16	-0.09	0.13	0.17	0.31	22		5186	P84082	ADP-ribosylation factor 2	Arf2	0	0	0	0	0	0.57	31
3175	D4AD89		Sez6l	-0.56	0	0	0	0	0	26		444	A0A0G2JZC6;F1LQS9;Q9ES67	Rho guanine nucleotide exchange factor 11	Arhgef11	0	0	0	0	0	0.42	31
2321	D3ZNQ6		Ube2m	0	0	-0.12	0	0.17	0.24	17		1667	B4F7E2;P50430;A0JPJ3	Arylsulfatase B	Arsb	0	0	0.18	0	0.1	0.32	9
2328	M0RBQ5;D4A817;D3ZNZ9	Histone H2B	Hist3h2bb;LOC100912338;Hist3h2ba	0	0	0	0	0	0.16	32		169	A0A0G2JTG7;Q8VHV7;Q8VHV7-2;Q499R8;G3V9Q3;Q8VHV7-3	Heterogeneous nuclear ribonucleoprotein H;Heterogeneous nuclear ribonucleoprotein H, N-terminally processed	Hnrnph1	0	0	0	0	-0.08	0.26	9
2330	D3ZP15		Rab9b	0	-0.36	-0.26	0	0	0	4		530	A0A1B0GWY5;A0A0G2K0V4;Q5FVC2;A0A1B0GWX6;A0A1B0GWW1	Rho guanine nucleotide exchange factor 2	Arhgef2	0	0	0	0	0	0.36	9
136	A0A0G2JSR6;P43425	Guanine nucleotide-binding protein G(I)/G(S)/G(O) subunit gamma-7	Gng7	0	-0.41	0	0	0	0	36		1786	B6DYQ7;P04906;D4A8S2;A0A0G2K4Q5	Glutathione S-transferase P	Gstp1;RGD1307603	0	0	0.23	0	0	0.35	9
2336	D3ZPE5;B4F763		Vps53	0	-0.28	0	0	0	0.21	15		2351	D3ZPP2		Arl8a	0	0	0	0	0	0.47	31
6564	Q6AYY8	Acetyl-coenzyme A transporter 1	Slc33a1	0	-0.41	0	0	0	0	36		1979	D3ZCG3;D3ZKH2		Mon2	0	0	0.18	0	0	0.26	9
1214	A2VD09;Q9QZM5	Abl interactor 1	Abi1	-0.36	-0.44	-0.26	0	0	0	9		89	A0A0A0MY43;F1LPQ2;B5DFL2	Activating signal cointegrator 1 complex subunit 3	Ascc3	0	0	0	0	0	0.29	9
2344	D3ZPL1		Cpsf6	0	0	0	0	0	0.27	32		2050	D3ZEJ9		RGD1310429	0	0	0.25	0	0	0.32	9
2346	D3ZPN0		Pcdh17	0.3	0	0	0	0	0	25		4768	Q4QRB8;P20673	Argininosuccinate lyase	Asl	0	0	0	0	0	0.4	31
2348	D3ZPN3		Mlf2	-0.3	0	0	0	0	0	13		2416	D3ZRN5		Trove2	0	0.15	0.19	0	0	0.35	9
2350	Q6PDW2;D3ZPN7;D3ZZH9;M0R5R7;D4A870;D3ZPH0;D3ZMI8;D3Z9G3;F1LWH4;D3ZRA9;D3ZLH3;D3ZEK2;D4A7B4;D4A219;D3ZHP4;M0RAP0;M0RCS9;D3ZCN5;D4A4G7;D3ZIM9;D4A9T8		LOC100360604;LOC681195;LOC686080;RGD1565370;RGD1562839;LOC100361103;RGD1560414;RGD1562601;RGD1562923;LOC100360611;RGD1565159;RGD1561875;RGD1565555;RGD1566270;RGD1564552	0	0	0	0	0.15	0	10		6620	Q6MG11;A0A0G2K9K5	Alpha-tubulin N-acetyltransferase 1	Atat1	0	0	0	0	0	0.26	9
2351	D3ZPP2		Arl8a	0	-0.22	0	0	0	0.33	15		6566	Q6AZ50	Ubiquitin-like-conjugating enzyme ATG3	Atg3	0	0	0	0	0	0.27	9
2353	D3ZPR0		Cse1l	-0.2	-0.17	0	0	0.16	0	6		4438	O35567	Bifunctional purine biosynthesis protein PURH;Phosphoribosylaminoimidazolecarboxamide formyltransferase;IMP cyclohydrolase	Atic	0	0	0	0	0	0.24	9
1330	B0BNL2		LOC364561	-0.36	-0.38	-0.25	0	0	0	9		2210	D3ZJK8		Atp8a1	0	0	0	0	0	0.47	31
2359	D3ZQ02		Wdr37	0	-0.4	-0.17	0	0	0	4		6906	Q8VGC3;A0A0G2JSZ0;D3ZWK0;Q8VGC3-2;Q8VGC3-5;Q8VGC3-4;Q8VGC3-3	Voltage-dependent L-type calcium channel subunit beta-2	Cacnb2	0	0	0	0	0	0.37	9
5586	Q4V882	Epsin-3	Epn3	0	-0.4	0	0	0	0	36		3717	F1M7K7;Q8VHW5	Voltage-dependent calcium channel gamma subunit;Voltage-dependent calcium channel gamma-8 subunit	Cacng8	0	0	0	0	0	0.23	9
2363	D3ZQ57		Plxnb2	-0.19	0	0	0	0.15	0	13		3014	D4A8A0		Cad	0	0	0	0	0	0.27	9
2370	D3ZQD3		Ogdhl	-0.16	0	0	0	0	0	13		3050	D4A9D6		Dhx9	0	0.16	0.08	0	0	0.26	9
2372	D3ZQE8		Xpo5	0	0	0	0	0	1.01	5		3051	D4A9D8	Oxysterol-binding protein	Osbp	0	-0.18	0	0	0	0.2	9
5661	Q568Z9	Phytanoyl-CoA hydroxylase-interacting protein	Phyhip	0	-0.56	-0.53	0	0.26	0.44	24		6827	Q7TT49;A0A0G2KB58	Serine/threonine-protein kinase MRCK beta	Cdc42bpb	0	0	0	0	0	0.14	9
4003	G3V7G0;Q9QXU8	Cytoplasmic dynein 1 light intermediate chain 1	Dync1li1	0	0	0	0	0.21	0.42	17		3141	D4ACB8		Cct8	0	0	0.07	0	0	0.12	9
2381	D3ZQM0		Sf3a1	-0.27	-0.12	0	0	0	0	13		5854	Q5M963;P69060	N-acylneuraminate cytidylyltransferase	Cmas	0	0	0	0	0	0.38	9
5062	P62483;A0A0G2K670	Voltage-gated potassium channel subunit beta-2	Kcnab2	-0.79	-0.53	0	0	0	0	27		321	A0A0G2JWM2;Q5RJQ4	NAD-dependent protein deacetylase sirtuin-2	Sirt2	0	0	-0.08	0	0	0.14	9
2384	D3ZQP6		Sema7a	-0.28	0	0	0	0	0	13		4882	P37397	Calponin-3	Cnn3	0	0	0	0	0	0.21	9
2389	D3ZQY4		Fryl	0	0	0	0	0.3	0	10		3295	F1LM55;B5DFM4		Ccar2;RGD1309922	0	0	0.2	0.16	0	0.26	9
2393	D3ZR52		Lpcat4	-0.63	-0.33	-0.31	0	0	0.33	3		3299	F1LM66;Q5EB83;A0A1W2Q6N7		Eftud2	0	0	0	0	-0.11	0.27	9
5433	Q3ZAV8;F7F707	Enhancer of mRNA-decapping protein 4	Edc4	0	0	0	0	0.33	0.4	17		3148	D4ACK7		Cnnm3	0	0	0	0	0	0.33	9
2401	D3ZRC4;A0A0G2K621;A0A1W2Q6K3;A0A1W2Q6C9;A0A1W2Q6G9		Pnpla8	0	0	-0.15	0	0	0	28		6430	Q68FW9	COP9 signalosome complex subunit 3	Cops3	0	0	0	0	0	0.15	9
2402	D3ZRD3		Pde6d	0	0	0	0	0.3	0	10		5326	Q157S1	CREB-regulated transcription coactivator 1	Crtc1	0	0	0	0	0	0.57	31
2404	D3ZRF6;M0R715		Pnpla6	0	0	0	0	0.39	0	34		3528	F1LV13;F1M3D3;Q62826;Q62826-2;A0A0G2JZ75;Q9WV78	Heterogeneous nuclear ribonucleoprotein M;Plasmalemma vesicle-associated protein	Hnrnpm;Plvap	0	0	0.09	0	0	0.25	9
241	A0A0G2JUX5			0	0	0	0	0.36	0	34		5980	Q5U2N0	CTP synthase 2	Ctps2	0	0	0	0	0	0.25	9
2410	D3ZRJ0		Adck1	0	0	-0.26	0	0	0	28		68	A0A0K1W396;C4PAV9;C7EMI4;U3M4V1;H8Y1J4;A4UHZ3;A4UHZ2;B3Y999;K7T8L3;A0A0U3BXX1;G8HZ47;M9TEK6;E0A0C7;A0A0U2UDS4;A0A0U2M179;A0A0U2IDR8;E0A016;F8QU31;E0A075;L0L4L8;A0A140GE11;A0A140GE10;A0A140GE09;A0A140GE08;E0A019;A0A097PE40;S5RKC8;R9TL61;R9TKN1;Q8SEY9;Q8HIC4;Q5UAI7;Q06Q99;L0N495;L0N490;L0N311;L0N1V8;H6RXT5;H2KXA0;F8QU37;F2Q6S6;F2Q6S5;D6NSS7;D6NSS6;D6NSR9;D6NSR8;D6NSR7;D6NSR3;D6NSR2;D6NSR1;D6NSQ8;D6…	Cytochrome b	cyt b;cytb;CYTB;Mt-cytb;CYB;Mt-Cyb	0	0	0	0	0	0.14	9
2412	D3ZRM5		Rab23	0	0	-0.14	0	0	0	28		3631	F1M1B3		RGD1564420	0	0	0.14	0	0	0.18	9
2413	D3ZRM9;P41123;A0A0G2JYG9;F1M2E9;D3ZD02	60S ribosomal protein L13	LOC100360491;Rpl13;RGD1563145	0	0	0	0	0	0.22	32		3668	F1M471		Epm2aip1	0	0	0	0.09	0	0.36	9
3700	F1M6I9		Celf4	-0.78	-0.5	0	0	0	0	27		3674	F1M4I4		Vps51	0	0	0.14	0	0	0.14	9
2425	D3ZSA9		Nomo1	0	0	0	0	0	0.16	32		755	A0A0G2K5V8;F1LNN8;B5DFH6		Dapk1	0	0	0	0	0	0.46	31
243	D3ZKK5;A0A0G2JUZ0		Mtmr1	0	-0.39	-0.32	0	0	0	33		868	A0A0G2K8D6;D3ZRV0	DCN1-like protein	Dcun1d1	0	0	0	0	0	0.23	9
1608	B2RZ97;F1LRJ0;A0A0G2JX46		Kcmf1	0	-0.4	0	0	0	0	36		2004	D3ZD73		Ddx6	0	0	0	0	0	0.37	9
2443	D3ZSZ4		Pgbd5	0	0	0	0	0	0.37	1		3823	F2W8B0;P22734-2;P22734	Catechol O-methyltransferase	Comt	0	0.09	0.13	0	0	0.14	9
1020	A0A0H2UHC0;F1LQX4-3;F1LQX4-2;F1LQX4	Rho GTPase-activating protein 44	Arhgap44	0	-0.39	0	0	0	0	36		3942	G3V6Q6;Q9JID2	Guanine nucleotide-binding protein subunit alpha-11	Gna11	0	0	0.09	0	0.1	0.17	9
4471	O55173	3-phosphoinositide-dependent protein kinase 1	Pdpk1	0	-0.39	0	0	0	0	36		3956	Q6P7D2;G3V6V1;O09175	Aminopeptidase B	Rnpep	0	0.2	0.19	0.16	0	0.22	9
2455	D3ZT71		Bcl2l13	-0.16	0	0	0	0	0	13		3958	G3V6W6;Q32PW9		Psmc6	0	-0.14	0	0	0	0.2	9
2466	D3ZTK0		Ttc9b	0	-0.55	-0.44	0	0	0	33		2009	D3ZD97		Dhx15	0	0	0	0	0	0.47	31
2483	D3ZTX0	Transmembrane emp24 domain-containing protein 7	Tmed7	0	0	0	0	0	0.26	32		5868	Q5M9H7;O35824	DnaJ homolog subfamily A member 2	Dnaja2	0	0	0	0	0	0.21	9
5683	Q5BJP4		Rbm39	0	-0.18	0	0.23	0.43	0.63	11		4086	G3V8B6;A0A0G2JTW5;O88761;Q5PPJ7;A1A5N2;Q3KR62	26S proteasome non-ATPase regulatory subunit 1	Psmd1	0	-0.08	0.08	0.06	0	0.14	9
5067	P62632	Elongation factor 1-alpha 2	Eef1a2	0	0	0	0	0.46	0.94	11		4132	Q4QQS4;G3V8T5		Ruvbl2	0	0	0.18	0	0	0.23	9
2503	D3ZUI1		Apip	-0.24	0	0	0	0	0	13		1366	E9PU42;B1H223		Dscr3	0	0	0	0	0	0.29	9
7097	Q9QYU4;A0A0G2K568	Ketimine reductase mu-crystallin	Crym	0	-0.52	-0.19	0	0.12	0.16	24		4244	M0R544		Gaa	0	0	-0.14	0	0	0.38	9
2512	D3ZUM2		Sarm1	0	0	0	0.1	0	0	25		431	F1LY70;A0A0G2JZ53		Birc6	0	0	0.23	0	0	0.27	9
2513	D3ZUM4	Beta-galactosidase	Glb1	0	0	0.17	0	0	0	25		4327	M0R9X8;F1LRT9;P38650;Q6LCG3	Cytoplasmic dynein 1 heavy chain 1	Dync1h1	0	-0.03	0.16	0.03	-0.08	0.14	9
2515	D3ZUP5		Brk1	0	-0.61	-0.37	0	0	0	33		5388	Q3B8Q2	Eukaryotic initiation factor 4A-III;Eukaryotic initiation factor 4A-III, N-terminally processed	Eif4a3	0	0	0	0	0	0.48	31
3433	F1LR60;O35430-2;O35430	Amyloid beta A4 precursor protein-binding family A member 1	Apba1	-0.56	0	0	0	0	0	26		5116	P63074;A0A1W2Q627	Eukaryotic translation initiation factor 4E	Eif4e	0	0	0	0	0	0.29	9
1203	A1L1M0;P27791-2;P27791	cAMP-dependent protein kinase catalytic subunit alpha	Prkaca	0	-0.39	0	0	0	0	36		5288	Q07205	Eukaryotic translation initiation factor 5	Eif5	0	0	0	0	0	0.17	9
2527	D3ZUY0;A0A1B0GWW7		Rdh14	-0.18	0	0	0	0	0	13		4553	P04762	Catalase	Cat	0	0.15	0.12	0	0	0.32	9
1693	B5DEN4;P04642;Q6P9U7;H9N9H4;Q6AYX2;P19629	L-lactate dehydrogenase;L-lactate dehydrogenase A chain;L-lactate dehydrogenase C chain	Ldha;LDHC;Ldhc	-0.32	-0.45	-0.37	0	0	0	9		6121	Q5XII0	Mammalian ependymin-related protein 1	Epdr1	0	0	0	0	0	0.38	9
253	A0A0G2JV54;Q9Z118	Polypyrimidine tract-binding protein 3	Ptbp3	0	0	0	0	0	0.86	5		3592	F1LYQ8	FERM, RhoGEF and pleckstrin domain-containing protein 1	Farp1	0	0	0	0	0	0.36	9
3518	F1LUB7;Q6RVG2-3;Q6RVG2-2;Q6RVG2	Anion exchange protein;Electroneutral sodium bicarbonate exchanger 1	Slc4a8	0	-0.39	0	0	0	0	36		112	A0A0G2JSJ8;P17164	Tissue alpha-L-fucosidase	Fuca1	0	0	0	0	0	0.29	9
2533	D3ZV52		Itsn1	0	0	-0.35	0	0	0	14		4680	P13084;P13084-2;D3ZXI2;D3ZP59	Nucleophosmin	Npm1	0	0	0.18	0	0	0.19	9
2550	D3ZVQ0	Ubiquitin carboxyl-terminal hydrolase	Usp5	-0.2	-0.18	0	0	0.13	0.22	37		6672	Q6P7A9	Lysosomal alpha-glucosidase	Gaa	0	0	0	0	0	0.42	31
2551	D3ZVQ3;B0BN11		Porcn	0	0	0	0	0.19	0	10		4720	P17046	Lysosome-associated membrane glycoprotein 2	Lamp2	0.23	0	0.23	0	0	0.29	9
177	A0A0G2JTL4;Q63116;Q9EQ22;Q9EQ24	Tyrosine-protein kinase receptor	Kit	-0.24	-0.26	-0.49	0	0	0	9		4776	P21775;F1LPD6;P21775-2;P07871	3-ketoacyl-CoA thiolase A, peroxisomal;3-ketoacyl-CoA thiolase B, peroxisomal	Acaa1a;Acaa1b	0	0	0	0	0.08	0.2	9
2557	D3ZVU6		Avl9	0	0	-0.27	0	0	0	28		4782	P22509	rRNA 2-O-methyltransferase fibrillarin	Fbl	0	0	0.18	0	0	0.34	9
2585	D3ZWL6	Adenosylhomocysteinase	Ahcyl2	0	-0.47	-0.24	0	0	0.22	24		4811	P27615	Lysosome membrane protein 2	Scarb2	0	0	0.08	0	0.09	0.31	9
2160	D3ZHX3		Diras2	-0.46	-0.23	0	0.21	0.38	0.4	16		4851	P34058;A0A0G2K793	Heat shock protein HSP 90-beta	Hsp90ab1	0	-0.12	0.1	-0.1	0	0.19	9
2565	D3ZW55	Inosine triphosphate pyrophosphatase	Itpa	0	0	0	0	0.14	0.17	32		5950	Q5RKH2		Galk1	0	0	0	0	0	0.29	9
2195	D3ZJ86	Sodium/hydrogen exchanger	Slc9a6	0	-0.39	0	0	0	0	36		4897	P41777;A0JN19	Nucleolar and coiled-body phosphoprotein 1	Nolc1	0	0	0.15	0	0	0.2	9
2314	D3ZN95		Hcfc1	0	-0.17	0	0	0.15	0.33	22		4900	P42346;A0A0G2JX74	Serine/threonine-protein kinase mTOR	Mtor	0	0	0.2	0	0	0.17	9
1663	B4F7C2		Tubb4a	0	-0.46	-0.26	0.18	0.24	0.4	24		5360	Q32KJ6;A0A0G2K4H6	N-acetylgalactosamine-6-sulfatase	Galns	0	0	0	0	0	0.2	9
260	D4A1Y0;A0A0G2JVC2		Scyl2	0	0	-0.39	0	0	0	14		4986	P55051	Fatty acid-binding protein, brain	Fabp7	0.34	0	0	0.16	0	0.14	9
2600	D3ZWV8		Tiam1	0	0	0	0	0.18	0	10		1728	B5DF50;A0A0G2JU25;D3ZFD2	Polypeptide N-acetylgalactosaminyltransferase	Galnt2	0	0	0	0	0	0.38	9
2601	D3ZWW5		Slc30a9	0	0	-0.3	0	0	0	14		665	A0A0G2K3N1;F1M8X9		Gbf1	0	0	0	0	0	0.63	31
2602	D3ZWX4		Nckipsd	0	0	0	0	0	0.21	32		5096	P62959;D4A269	Histidine triad nucleotide-binding protein 1	Hint1	0	0	0.17	0	0	0.26	9
2609	D3ZX38		Pfdn1	0	-0.25	0	0	0.17	0	29		5314	Q0VGK4;A0A0G2K080;A0A0G2K8E7	Glycerophosphodiester phosphodiesterase domain-containing protein 1	Gdpd1	0	0	0	0	0	0.19	9
2610	D3ZX42		Rabgap1	0	-0.36	0	0	0.22	0	36		5183	P84039	Ectonucleotide pyrophosphatase/phosphodiesterase family member 5	Enpp5	0	0	0.19	0	0	0.31	9
1224	G3V9T4;A6ZIQ8;B1WBL7	Trimeric intracellular cation channel type A	Tmem38a	0	-0.39	0	0	0	0	36		6595	Q8CJH4;Q6IN37		Gm2a	0	0	0	0	0	0.52	31
2622	D3ZXI0;B2RYR3	Pyrroline-5-carboxylate reductase	Pycr1	0	0	0	0	0.34	0	34		6618	Q6MG06;A0A0G2K6Q5;A0A0G2K444;Q5XI09	Guanine nucleotide-binding protein-like 1	Gnl1	0	0	0	0	0	0.23	9
2627	D3ZXL1;Q5XI15		Arih1	0	0	-0.15	0	0	0	28		905	A0A0G2K9B2;Q80VJ4	Glycerophosphocholine phosphodiesterase GPCPD1	Gpcpd1	0	0	0	0	0	0.41	31
2634	D3ZXY2		Pdzd8	0	0	0	0	0.11	0	10		149	A0A0G2JT06;A0A0G2JW80;P97834	COP9 signalosome complex subunit 1	Gps1	0	0	0	0	0	0.24	9
2647	D3ZYD7		Ccdc88a	-0.27	-0.15	0	0	0	0	6		616	A0A0G2K2P6;Q6AXM7	HBS1-like protein	Hbs1l	0	0	0	0	0	0.19	9
2658	D3ZYR1	F-BAR domain only protein 2	Fcho2	-0.28	0	0	0	0	0	13		6303	Q641X3	Beta-hexosaminidase subunit alpha	Hexa	0	0	0	0	0	0.28	9
2667	D3ZYY0		Sdr39u1	0	0	-0.2	0	0	0	28		6453	Q6AXR4;F1LR87	Beta-hexosaminidase subunit beta	Hexb	0	0	0	0	0	0.35	9
2674	D3ZZ44		Elfn1	0	0	-0.3	0	0	0	14		4713	P15865	Histone H1.4	Hist1h1e	0	0	0	0	0	0.38	9
3557	F1LWK7;A0A0G2K7Z4		Ablim1	0	-0.38	0	0	0	0	36		3659	F1M3H8		Hnrnpa0	0	0	0	0	0	0.41	31
1993	D3ZCU8		Rab33a	-0.26	-0.36	-0.39	0	0	0	9		6665	Q6P747;F1M6V1;A0A096MKG6;A0A096MJ10	Heterochromatin protein 1-binding protein 3	Hp1bp3	0	0	0	0	0	0.44	31
7028	Q9JHZ4;Q9JHZ4-2	GRIP1-associated protein 1	Gripap1	0	-0.38	0	0	0	0	36		5432	Q3ZAU6;B2GV23		Rnf14	0	0	0	0.11	0	0.14	9
2684	D3ZZC3;A0A0G2KA06	Kelch-like protein 22	Klhl22	0	-0.27	-0.22	0	0.32	0	4		544	Q6PAH0;Q65ZS7;A0A0G2K151;P02650	Apolipoprotein E	Apoe	0	0	-0.17	0	0	0.23	9
2687	D3ZZF8		Paip1	0	0	0	0	0	-0.66	25		5494	Q4G017	Nischarin	Nisch	0	0	0.17	0	0	0.19	9
2058	D3ZES7		Plxna4a	-0.34	-0.35	-0.14	0	0	0	9		5519	Q4KLK7;Q5RJN5		Nop56	0	0.11	0.2	0	0	0.32	9
2695	D3ZZN3	Acetyl-coenzyme A synthetase	Acss1	-0.22	-0.24	0	0	0	0	6		5230	Q6IN39;P97852	Peroxisomal multifunctional enzyme type 2;(3R)-hydroxyacyl-CoA dehydrogenase;Enoyl-CoA hydratase 2	Hsd17b4	0	0	0	0	0	0.21	9
2696	D3ZZP2		Rab39a	0	0	0	0.12	0	0	25		3011	D4A857		Ipo9	0	0	0	0	0	0.21	9
2703	D3ZZV1;Q6EIX2	Mitochondrial import inner membrane translocase subunit TIM16	Pam16;Magmas-ps1	-0.25	0	0	0.14	0	0	13		5624	Q4VFZ4;B1WBN6;A0A0G2JX20	Katanin p80 WD40 repeat-containing subunit B1	Katnb1	0	0	0.24	0	0	0.29	9
2709	D3ZZZ9		Ctnnd1	-0.14	0	0	0	0.1	0	13		2915	D4A5J1		Kbtbd11	0	0	0	0	0	0.17	9
2710	D4A017		Tmem87a	0	0	0	0	0	0.42	1		2164	D3ZI07	Kinesin-like protein	Kif3b	0	0	0	0	0	0.45	31
2712	D4A022		Gapvd1	0	0	0	0	0.19	0	10		5973	Q5U204	Ragulator complex protein LAMTOR3	Lamtor3	0	0	0	0	0	0.25	9
2714	D4A031		Ddx42	-0.31	-0.34	0	0	0	0	6		183	A0A0G2JTN4;D4AB17		LOC100912917	0	0	0	0	0	0.34	9
3311	F1LMN8;Q9JLP1	KH domain-containing, RNA-binding, signal transduction-associated protein 3	Khdrbs3	0	-0.38	0	0	0	0	36		5281	Q06000	Lipoprotein lipase	Lpl	0	0	0	0	0	0.72	31
2718	D4A055-1;D4A055		Cacnb4	0	-0.32	-0.42	0	0	0	4		7093	Q9QYL8	Acyl-protein thioesterase 2	Lypla2	0	0	0	0	0	0.29	9
2720	D4A068		Pnma2	0	0	0	0	0	0.44	1		5489	Q4FZV0;Q4FZV0-2	Beta-mannosidase	Manba	0	0	0	0	0	0.48	31
4079	G3V881;Q562A6		Lingo1	-0.78	-0.58	-0.19	0	0.23	0	27		5543	Q4KSH6;F1LP57;S4VP54		Map2k4	0	0	0	0	0	0.26	9
212	A0A0G2JUB0;Q810F4	Protein FAM3C	Fam3c	-0.45	0	0	0	0.45	0	19		3337	F1LNE5;Q4QQR9	Protein MEMO1	Memo1	0	0	0	0	0	0.48	31
2726	D4A0E8	Protein arginine N-methyltransferase 5	Prmt5	0	0	-0.19	0	0	0.21	32		2035	D3ZE72	Methionine aminopeptidase 1	Metap1	0	0	0	0	0	0.57	31
2730	D4A0T0		Ndufb10	0	0	-0.14	0	0	0	28		4446	O35821	Myb-binding protein 1A	Mybbp1a	0	0	0	0	0	0.24	9
2733	D4A0W1		Emc4	-0.24	0	0	0	0	0	13		7090	Q9QYF3	Unconventional myosin-Va	Myo5a	0	0	0	0	0	0.23	9
2735	D4A0X3		Btbd8	0	-0.51	-0.3	0	0	0	33		6350	Q66H12	Alpha-N-acetylgalactosaminidase	Naga	0	0	0	0	0	0.28	9
2740	D4A105		Tmem63b	0	0	0	0	0	0.41	1		6212	Q63009;A0A0G2K9I8	Protein arginine N-methyltransferase 1	Prmt1	0	0	0.18	0	0	0.35	9
2354	D3ZPT0;D3ZUH5		Prr36	-0.25	-0.43	-0.24	0	0	0	9		6264	Q63570	26S protease regulatory subunit 6B	Psmc4	0	-0.11	0	0	0	0.21	9
275	A0A0G2JVL6;Q7TP78;F7EXQ7		Ndufa8	0	-0.23	-0.19	0	0.08	0	4		1421	B1WC26		Nans	0	0	0	0	0	0.3	9
3995	G3V7A5;P35952	Low-density lipoprotein receptor	Ldlr	0	-0.38	0	0	0	0	36		3390	F1LPV0		Nars	0	0	0	0	0	0.28	9
2752	D4A197		Mcee	0	0	-0.23	0	0	0	28		4991	P55770;H7C5X3	NHP2-like protein 1;NHP2-like protein 1, N-terminally processed	Nhp2l1;RGD1566078	0	0	0	0	0	0.27	9
2755	D4A1B8		Dctn3	-0.3	0	0	0	0.12	0.28	37		6392	Q66HM7;P38656;Q4V8Q3;D3ZLH9	Lupus La protein homolog	Ssb;LOC680385	0	-0.13	0	0	0	0.32	9
5868	Q5M9H7;O35824	DnaJ homolog subfamily A member 2	Dnaja2	-0.29	0	0	0	0.32	0.54	16		2425	D3ZSA9		Nomo1	0	0	0	0	0	0.15	9
6436	Q68FX9	NAD-dependent protein deacylase sirtuin-5, mitochondrial	Sirt5	0	-0.38	0	0	0	0	36		4021	G3V7K5;A0A1B0GWU5;B2RYH4		Npc1;Cdig2	0	0	0	0	0	0.42	31
4632	P0CC10	Leucine-rich repeat-containing protein 4B	Lrrc4b	-0.64	-0.23	-0.15	0	0	0	27		5272	Q04970	GTPase NRas	Nras	0	0	0	0	0	0.15	9
4936	P50137	Transketolase	Tkt	0	-0.38	0	0	0	0	36		5837	Q5M823	NudC domain-containing protein 2	Nudcd2	0	0	0	0	0	0.67	31
36	A0A096MJW2;A0A0H2UHL1;Q66H50;A0A096MJJ7	Fatty acyl-CoA reductase 1	Far1	0	-0.37	0	0	0	0	36		4663	P11654	Nuclear pore membrane glycoprotein 210	Nup210	0	0	0	0	0	0.15	9
2782	D4A208;A0A0G2JZ92;B5DEJ1	SLIT-ROBO Rho GTPase-activating protein 2	Srgap2	0	-0.44	0	0	0	0.16	36		1258	B0BMY6		Otulin	0	0	0	0	0	0.31	9
2786	D4A249		Mblac2	-0.23	-0.36	0	0	0	0	6		2493	D3ZU56;F1M797;D3ZXE2;Q6TRW4-2;Q6TRW4-3;Q6TRW4;D3ZMU3	Sister chromatid cohesion protein PDS5 homolog B	Pds5b	0	0	0	0	0	0.79	31
2799	D4A2D7		Ipo4	0	0	0	0	0	0.28	32		6773	Q76EQ0;A0A0U1RRW0	Serine racemase	Srr	0	0	0.14	0	0	0.23	9
2802	D4A2F1;F1LPF2;P25304-3;P25304-4;P25304-2;P25304-5;P25304-6;P25304	Agrin;Agrin N-terminal 110 kDa subunit;Agrin C-terminal 110 kDa subunit;Agrin C-terminal 90 kDa fragment;Agrin C-terminal 22 kDa fragment	Agrn	0	0	0.25	0	0	0	30		7046	Q9JJK4	Peroxisomal biogenesis factor 3	Pex3	0	0	0	0	0	0.3	9
2808	D4A2K5		Nrip3	0	0	-0.3	0	0	0.27	14		5983	Q5U2N3	Membrane-associated phosphatidylinositol transfer protein 1	Pitpnm1	0	0	0	0	0	0.25	9
2812	D4A2P1		Ccar1	-0.2	-0.12	0	0	0	0	13		5559	Q4QQW8;B1WBP6	Putative phospholipase B-like 2	Plbd2	0	0	0	0	0	0.29	9
2816	D4A304		Diras1	-0.33	-0.27	0	0	0.18	0	6		6960	Q99MI7	NEDD8-activating enzyme E1 catalytic subunit	Uba3	0	0	0.25	0	0	0.27	9
2817	D4A305		Ccdc58	0	0	-0.08	0	0	0	28		7008	Q9ES71	Dihydroxyacetone phosphate acyltransferase	Gnpat	0	0	0.13	0	0	0.39	9
2821	D4A3C2		RGD1304884	-0.23	0	0	0	0.15	0	13		1725	B5DF46	Phosphomannomutase	Pmm2	0	0	0	0	0	0.4	31
2823	D4A3D9		Stk32c	0	-0.4	-0.25	0	0	0	4		7152	Q9Z0V5	Peroxiredoxin-4	Prdx4	0	0	0	0	0	0.2	9
2824	D4A3E1		Hnrnpll	0	-0.31	0	0	0	0.47	15		6096	Q5XIC6		Psmd12	0	0	0	0	0	0.21	9
2583	D3ZWJ9		RGD1306151	0	-0.33	-0.26	0	0.47	0.42	22		1492	B2GV92;P83868;Q5PQL9	Prostaglandin E synthase 3	Ptges3;Ptges3l1	0	0	0	0	0	0.21	9
3662	F1M3P6		Scai	0	-0.37	0	0	0	0	36		3551	F1LW77		Rab33b	0	0	0	0	0	0.27	9
6591	Q6IMZ5;P70567	Tropomodulin-1	Tmod1	0	-0.37	0	0	0	0	36		5420	Q3SWS8	mRNA export factor	Rae1	0	0	0	0	0	0.5	31
2746	D4A133;A0A1W2Q6N0		Atp6v1a	-0.19	-0.37	-0.22	0	0	0	9		6764	Q71UF4	Histone-binding protein RBBP7	Rbbp7	0	0	0	0	0	0.41	31
2852	D4A3X6	Phospholipid-transporting ATPase	Atp8a2	0	0	0.34	0	0.29	0	30		3239	E2RUH2;A0A0G2K9E0;P29315	Ribonuclease inhibitor	Rnh1	0	0	0	0	0	0.23	9
2854	I6L9I0;D4A414		Cox15	0	-0.3	-0.33	0	0	0	4		1023	A0A0H2UHE1;P13086;P70631	Succinyl-CoA ligase [ADP/GDP-forming] subunit alpha, mitochondrial	Suclg1	0	0	-0.23	0	0	0	10
2858	D4A435		Icam5	-0.42	-0.64	-0.34	-0.1	0	0	18		1117	A0A140TAE6;Q9Z311;Q9Z311-2	Trans-2-enoyl-CoA reductase, mitochondrial	Mecr	0	0	-0.19	0	0	0	10
2867	D4A4F9		LOC682489	0	-0.91	-0.45	0	0	0	2		1122	A0A140TAF7;G3V9D0;Q5BJN4	Protein O-glucosyltransferase 1	Poglut1	0	0	-0.18	0	0	0	10
2868	D4A4H5		Sdf2	0	0	0	0	0.17	0	10		1169	A0JN29		Lnp	0	0	-0.25	0	0	0	10
2869	D4A4J0		Supt16h	0	0	-0.21	0	0	0	28		1170	A0JN30		Cnpy2	0	0	-0.25	-0.12	0	0	10
287	A0A0G2JVW5;E9PSZ5;Q5RJQ1		Huwe1	0	-0.37	0	0	0	0.38	15		1226	F1LNF1;A7VJC2;A7VJC2-4;A7VJC2-2;F1LM82;A7VJC2-3;B2GV69	Heterogeneous nuclear ribonucleoproteins A2/B1	Hnrnpa2b1	0	0	-0.14	0	0	-0.12	10
2876	D4A4P3;M0RA24		LOC100361144;LOC100362391	0	-0.29	-0.14	0	0	0	4		1232	A8WCF8;A0A0G2K272	Tumor protein p63-regulated gene 1-like protein	Tprg1l	0	0	-0.18	0	0	0	10
2879	D4A4Q4		Ociad2	0	0	0	0	0	0.75	5		1255	B0BMW2;O70351	3-hydroxyacyl-CoA dehydrogenase type-2	Hsd17b10	0	0	-0.18	0	0	0	10
2881	D4A4T0;I6L9H8		Stub1	0	-0.21	0	0	0.3	0	10		1281	Q5I0K4;B0BN68		Mrps9	0	0	-0.19	0	0	0	10
4024	G3V7L8;Q6PCU2;D3ZJ78	V-type proton ATPase subunit E 1	Atp6v1e1;Atp6v1e2	0	-0.36	0	0	0	0	36		1286	B0BN83	Armadillo repeat-containing protein 1	Armc1	0	0	-0.25	0	0	0	10
6032	Q5U3Z5		Bri3bp	0	-0.36	0	0	0	0	36		1292	B0BNA3;F7FFR1		Rars2	0	0	-0.21	0	0	0	10
2890	D4A4Z9		Ktn1	-0.2	-0.07	0	0	0.12	0	13		1312	B0BNF6		March5	0	0	-0.12	0	0	0	10
6175	Q62717	Calcium-dependent secretion activator 1	Cadps	0	-0.36	0	0	0	0	36		1314	B0BNG3		Lman2	0	0	-0.2	0	-0.14	0	10
4427	O35314	Secretogranin-1;PE-11;CCB peptide short form;CCB peptide long form	Chgb	0	-0.36	0	0	0	0	36		1390	B1WBQ0;O08837	Cell division cycle 5-like protein	Cdc5l	0	0	-0.11	0	0	0	10
2896	D4A520		Pptc7	0	-0.39	-0.21	0	0	0	4		1416	B1WC16;Q7TP73;A0A0G2K2S3;A0A0G2K1G0		Bclaf1	0	0	-0.23	0	0	0	10
2909	D4A5A6	DNA-directed RNA polymerase	Polr2a	0	0	0	0	0.68	0	34		1425	B1WC34		Prkcsh	0	0	-0.23	0	-0.08	0	10
2911	D4A5F4		RGD1311575	0	0	0.18	0	0	0.24	32		1432	B1WC61;Q7TSP3		Acad9	0	0	-0.24	0	0	-0.15	10
5606	Q4V8E1		Gatad2b	-0.37	-0.12	0	0	0.26	0	19		1448	B2GUV5		Atp6v1g1	0	0	-0.23	0	0	0	10
2915	D4A5J1		Kbtbd11	0	0	0	0	0	0.18	32		1459	B2GUZ3		Mthfd1l	-0.22	0	-0.23	0	0	0	10
2917	D4A5K6		Zmpste24	0	0	0	0.17	0	0	25		1469	B2GV15;Q99PU6		Dbt	0	0	-0.13	0	0	-0.13	10
2919	D4A5L9;P62898;CON__P62894;P10715	Cytochrome c, somatic;Cytochrome c, testis-specific	LOC679794;Cycs;Cyct	0	-0.2	-0.28	0	0	0	4		1567	B2RYT5;D3ZYX8		Cox7a2l	0	0	-0.19	0	0	0	10
2922	D4A5R0;D3ZUZ9	Peptidyl-prolyl cis-trans isomerase	Ppih	0	-0.33	0	0	0	0.32	15		1578	B2RYW3		Ndufb9	0	0	-0.17	0	0	-0.17	10
2926	D4A5W8		Pgs1	0	0	-0.28	0	0	0	28		1608	B2RZ97;F1LRJ0;A0A0G2JX46		Kcmf1	0	0	-0.17	0	0	0	10
2928	D4A5X7		Gdap1	-0.26	-0.41	-0.33	0	0	0	9		161	A0A0G2JT93;Q9WU82;B6DMG1	Catenin beta-1	Ctnnb1	0	0	-0.15	0	0.12	0	10
2934	D4A634		Ranbp6	0	-0.41	-0.24	0	0	0	4		163	A0A0G2JTA1;D3ZHI9		Ppp2r5e	0	0	-0.21	0	0.17	0	10
4457	O54783	Choline/ethanolamine kinase	Chkb	0	-0.36	0	0	0	0	36		1643	B4F764;Q4KM65	Cleavage and polyadenylation specificity factor subunit 5	Nudt21	0	0	-0.21	0	0	0	10
2939	D4A6D7;D4A6D7-2	Tetratricopeptide repeat protein 19, mitochondrial	Ttc19	0	0	-0.23	0	0	0	28		1778	B5DFN2;A0A140TAI8	Adenosylhomocysteinase	Ahcyl1	0	0	-0.12	0.19	0	0	10
2940	D4A6D8	Leucine-rich repeat transmembrane neuronal protein 1	Lrrtm1	0	0	0	0	0	-0.25	25		1779	B5DFN3;D3Z949	Ubiquinol-cytochrome-c reductase complex assembly factor 2	Uqcc2;RGD1561671	0	0	-0.25	0	0	0	10
2942	D4A6F2		Lynx1	-0.36	0	0	0	0	0	13		1792	C0IXW5;C0IXW6;E9PTY6;A0A096MIW7		Fry	0	0	-0.21	0	0	0	10
2944	D4A6H8		Ctnna2	0	-0.34	-0.18	-0.1	0	-0.07	4		1850	D3Z865		Mpdu1	0	0	-0.26	0	0	0	10
2951	D4A6P1		Sez6l2	-0.41	-0.31	-0.22	0.48	0	0	9		1910	D3ZAF6	ATP synthase subunit f, mitochondrial	Atp5j2	0	0	-0.2	0	0	0	10
3306	F1LMH0;Q9WU34;Q9WU34-3;Q9WU34-2	Neuronal-specific septin-3	Sept3	-0.36	-0.39	-0.24	0	0	0	9		1916	D3ZAN3		Ganab	0	0	-0.27	0	0	0	10
3180	D4ADD3		Hecw2	0	-0.36	0	0	0	0	36		1929	D3ZAW2;A0A0G2K0F9;A0A0G2JTF7		Pisd	0	0	-0.25	0	0	0	10
5273	Q05096;Q05096-3;Q05096-2	Unconventional myosin-Ib	Myo1b	0	-0.36	0	0	0	0	36		1934	D3ZAZ0	Eukaryotic translation initiation factor 3 subunit M	Eif3m	0	0	-0.1	0	0	0	10
2966	D4A742		Romo1	0	0	0	0	0	0.31	1		1938	D3ZB78		RGD1559864	0	0	-0.26	0	0	0	10
2967	D4A746		Gmppb	0	0	-0.33	0	0	0.17	14		1974	D3ZCA0		Prosc	0	0	-0.25	0	0.17	0	10
2968	D4A758		Lrrc8b	0	0	0	0	0.25	0	10		2017	D3ZDK7		Pgp	0	0	-0.18	0	0	0	10
2971	D4A771;D3ZZN4;P04646;A0A096P6M4;F1M0T2	60S ribosomal protein L35a	LOC100362049;LOC100362338;Rpl35a	0	0	0	0	0	0.33	1		202	D3ZGM1;A0A0G2JU15;Q4KM70		Ptcd3	0	0	-0.09	0	0	0	10
1544	B2RYN3		Eef1e1	0	0	0	0	0.28	0.36	17		2040	D3ZEG8		RGD1309188	0	0	-0.18	0	0	-0.14	10
7060	Q9JKL8	Activity-dependent neuroprotector homeobox protein	Adnp	-0.56	0	0	0	0	0	26		2044	D3ZEH3;A0A0U1RRQ7		Sec61a2	0	0	-0.26	0	0	0	10
5023	P60892;A0A0G2JSV3;M0RBK1	Ribose-phosphate pyrophosphokinase 1	Prps1;Prps1l1	0	-0.36	0	0	0	0	36		2058	D3ZES7		Plxna4a	-0.1	-0.11	-0.22	0	0	0	10
4437	O35550;G3V9J7	Rab GTPase-binding effector protein 1	Rabep1	0	-0.36	0	0	0	0	36		2064	D3ZF13	Acyl carrier protein	LOC683884	0	0	-0.15	0	0	0	10
2990	D4A7M0		Plxnc1	0	-0.49	-0.38	0	0	0	33		2122	R9PXS2;D3ZGS3	Inositol polyphosphate 5-phosphatase OCRL-1	Ocrl	0	0	-0.23	0	0	0	10
2995	D4A7R0	Signal recognition particle subunit SRP72	Srp72	0	0	0	0	0	0.48	1		2219	D3ZJX5		Timm50	0	0	-0.18	0	0	0	10
3436	F1LR84;P97738	Neuronal pentraxin-2	Nptx2	1.49	0.64	0	0	0.53	0	31		2233	D3ZKG1		Mut	0	0	-0.27	0	0	0	10
3011	D4A857		Ipo9	0	0	0	0	0	0.24	32		2338	D3ZPF2		Mcat	0	0	-0.25	0	0	0	10
3014	D4A8A0		Cad	0	0	0	0	0	0.44	1		2344	D3ZPL1		Cpsf6	0	0	-0.2	0	0	0	10
3029	D4A8N1		Dpm1	0	0	0	0.25	0.2	0	10		2363	D3ZQ57		Plxnb2	0	0	-0.21	0	0	0	10
3030	D4A8N2		Fdx1l	0	-0.26	-0.27	0	0	0	4		2401	D3ZRC4;A0A0G2K621;A0A1W2Q6K3;A0A1W2Q6C9;A0A1W2Q6G9		Pnpla8	0	0	-0.2	0	0	0	10
2827	D4A3H5	Chloride channel protein	Clcn6	0	-0.18	0	0	0.3	0.42	22		2457	D3ZT90		Gcdh	0	0	-0.12	0	0	0	10
4802	P26431;P48763-2;P48763	Sodium/hydrogen exchanger 1;Sodium/hydrogen exchanger 2	Slc9a1;Slc9a2	0	-0.36	0	0	0	0	36		2526	D3ZUX7		Acsf3	0	0	-0.22	0	0	0	10
3042	D4A932		Plekhm2	-0.22	0	0	0	0	0	13		2554	D3ZVS2		L2hgdh	0	0	-0.25	0	0	0	10
3043	D4A944		Snrnp40	-0.23	0	0	0	0	0	13		268	A0A0G2JVH4;A0A140TAG5;Q3KR86	MICOS complex subunit Mic60	Immt	0	0	-0.2	0	0	-0.1	10
1750	B5DFC8	Eukaryotic translation initiation factor 3 subunit C	Eif3c	0	0	0	0	0.15	0.42	17		2703	D3ZZV1;Q6EIX2	Mitochondrial import inner membrane translocase subunit TIM16	Pam16;Magmas-ps1	0	0	-0.18	0	0	0	10
305_m	A0A0G2JWA3;F1LQM9;Q5U3Y1		Xpo7	0	0	-0.24	0	0	0	28		2709	D3ZZZ9		Ctnnd1	0	0	-0.11	0	0	0	10
3050	D4A9D6		Dhx9	-0.33	-0.23	0	0	0	0.39	37		2730	D4A0T0		Ndufb10	0	-0.09	-0.2	0	0	-0.09	10
3051	D4A9D8	Oxysterol-binding protein	Osbp	0	0	0	0	0	0.23	32		2739	D4A104		Mrpl45	0	0	-0.17	0	0	0	10
3059	D4A9L2		Srsf1	0	-0.21	0	0.19	0.28	0.14	10		2755	D4A1B8		Dctn3	0	0	-0.1	0	0	0	10
3075	D4AA13		Dmxl1	0	0	-0.35	0	0	0	14		2786	D4A249		Mblac2	0	0	-0.24	0	0	0	10
3076	D4AA31		Prcp	0	0	0.24	0	0	0	30		2793	D4A264		Zadh2	0	0	-0.23	0	0	0	10
3079	D4AA63		Ubqln2	0	-0.17	0	0	0.2	0.24	15		2817	D4A305		Ccdc58	0	0	-0.27	0	0	0	10
3083	D4AAE9		Cisd2	0	-0.2	0	0.18	0.19	0	10		2890	D4A4Z9		Ktn1	0	0	-0.26	0	0	0	10
3089	D4AAM0;A0A0G2K8P2		Tnpo3	0	0	0	0	0.23	0	10		2911	D4A5F4		RGD1311575	0	0	-0.23	0	0	0	10
181	A0A0G2JTM9			0	-0.36	0	0	0	0	36		2914	D4A5I9		Myo6	0	0	-0.22	0	0	0	10
1968	D3ZC56		Dst	-0.23	0.06	0	0.07	0.32	0.28	16		3008	D4A830		Ppa2	0	0	-0.24	0	0	0	10
3103	G3V9H1;D4AB55;O08774;A0A0G2K326;O08774-2	Regulator of G-protein signaling 12	Rgs12	0	-0.48	-0.52	0	0	-0.28	33		301	A0A0G2JW85;Q9QYJ2;F1LSI5	Ras GTPase-activating protein 3	Rasa3	0	0	-0.1	0	0	0	10
5386	Q3B8Q0;M0R7M8;M0R8A4	Microtubule-associated protein RP/EB family member 2	Mapre2;LOC100911918	0	-0.35	0	0	0	0	36		3115	D4ABM3		Daam1	0	0	-0.17	0	0	0	10
3112	D4ABI7		LOC100365676	0	-0.25	0	0	0	0.27	15		3184	D4ADE8		Ddx3x	0	0	-0.27	0	0	0	10
2382	D3ZQN3		Pnmal2	-0.63	-0.36	0	0	0	0	27		3189	D4ADS4		Mgst3	0	0	-0.26	0	0	0	10
3114	D4ABK7		Hnrnph3	-0.22	0	-0.14	0	0	0	13		3278	Q9QX10;E9PTX9;Q9R1N0;Q9Z267		Slc12a2;NKCC1	0	0	-0.16	0	0	0	10
3115	D4ABM3		Daam1	0	-0.43	-0.25	0	0.08	0	33		3313	F1LMR7;P46101-2;P46101	Dipeptidyl aminopeptidase-like protein 6	Dpp6	0	0	-0.19	0	0.16	0	10
3117	D4ABN3;Q62910-2;Q62910;Q62910-5;Q62910-4;Q62910-3;Q62910-6;F1LZU2	Synaptojanin-1	Synj1;4933427I04Rik	-0.3	-0.57	-0.46	0.08	0.06	0	18		3333	F1LN92;Q5BJM6		Afg3l2	0	0	-0.23	0	0	0	10
3121	D4ABP9	F-box only protein 3	Fbxo3	0	-0.37	-0.28	0	0.21	0	4		3388	F1LPS8;P86252	Transcriptional activator protein Pur-alpha	Pura	0	0	-0.16	0	0	0	10
3125	D4ABT8		Hnrnpul2	-0.31	-0.2	0	0	0	0.23	37		3396	F1LQ48;B5DFG2;F2Z3R2;F1LQ48-2;Q9ET33		Hnrnpl	-0.2	0	-0.08	0	0	0	10
3133	D4AC23		Cct7	-0.15	-0.21	0	0	0.13	0.26	15		3572	F1LXF1		Bcr	0	0	-0.2	0	0	0	10
3134	D4AC36		Eif3f	0	0	0	0	0	0.26	32		3603	F1LZV1		Kalrn	0	-0.1	-0.18	0	0	0	10
3141	D4ACB8		Cct8	-0.18	0	0	0.07	0.14	0.28	32		3644	F1M2D4		Arhgap23	0	0	-0.22	0	0.21	0	10
5184	P84076	Neuron-specific calcium-binding protein hippocalcin	Hpca	-0.55	-0.84	0.23	0	0	0.47	21		3676	F1M4J1		LOC100294508	0	0	-0.25	0	0	0	10
3148	D4ACK7		Cnnm3	-0.29	0	0	0	0	0.36	37		3698	F1M6D0		Mrps6	0	0	-0.26	0	0	0	10
3150	D4ACM1		Elp3	0	0	0	0	0.5	0	34		3741	F1M888;P83900	Rap guanine nucleotide exchange factor 5	Rapgef5	0	0	-0.17	0	0	0	10
316	B4F7C9;A0A0G2JWH5		Stt3a	-0.33	0	0	0	0	0	13		3748	F1M8H6;Q3MID5;Q5I6B8	Phosphatidylinositol 4-phosphate 5-kinase type-1 gamma	Pip5k1c	0	0	-0.24	0	0	0	10
4327	M0R9X8;F1LRT9;P38650;Q6LCG3	Cytoplasmic dynein 1 heavy chain 1	Dync1h1	-0.24	-0.3	-0.08	0.13	0.3	0.48	16		3759	F1M949;Q32Q01		Ckap5	-0.13	-0.12	-0.12	0	0	0	10
3168	D4AD29		Lamtor4	0	0	0	0	0	0.16	32		3769	F1M9C9;Q5EB72		Hars2	0	0	-0.21	0	0	0	10
5793	Q5HZE4	Methylthioribose-1-phosphate isomerase	Mri1	0	-0.35	0	0	0	0	36		3788	F1MA42		Sez6	0	0	-0.21	0	0	0	10
3174	D4AD70;P63174;D3ZW57;D3ZZH2;D4A862	60S ribosomal protein L38	RGD1561636;Rpl38;LOC686066;LOC680353;LOC678816	0	0	0	0	0	0.46	1		3837	F7EMB2;Q6QI16		RGD1304704	0	0	-0.12	0	0	0	10
2046	D3ZEH9;G3C8Z1;Q5XIQ4	E3 ubiquitin-protein ligase MGRN1	Mgrn1	-0.55	0	0	0	0	0	26		387	A0A0G2JY22			0	0	-0.24	0	0	0	10
1752	B5DFD8	SH3 domain-binding glutamic acid-rich-like protein	Sh3bgrl	0	-0.35	0	0	0	0	36		3885	G3V640;O35094	Mitochondrial import inner membrane translocase subunit TIM44	Timm44	0	0	-0.24	0	0	-0.14	10
6937	Q921A2	Proton myo-inositol cotransporter	Slc2a13	0	-0.35	0	0	0	0	36		3913	G3V6G7;Q562B9;B1H2A4		Pnpt1	0	0	-0.19	0	0	-0.12	10
130	A0A0G2JSQ1;Q63754	Beta-synuclein	Sncb	0	-0.35	0	0	0	0	36		3957	G3V6W2;Q9WTV0	Prolactin regulatory element-binding protein	Preb	0	0	-0.14	0	0	0	10
319	B1WBR1;A0A0G2JWJ7;O35254	Golgi reassembly-stacking protein 1	Gorasp1	0	0	0	0	0.31	0	10		3964	G3V6Y9;O55035	Peptidyl-prolyl cis-trans isomerase G	Ppig	0	0	-0.15	0	0	0	10
3191	D4ADS9		Efr3a	0	-0.25	-0.33	0	0	0	4		3979	Q5EBA4;G3V728		Nipsnap1	0	0	-0.2	0	0	-0.1	10
3197	D4AE00	AP-3 complex subunit beta	Ap3b2	0	-0.31	-0.14	0	0	0.14	4		4011	G3V7I5;Q66HF8	Aldehyde dehydrogenase X, mitochondrial	Aldh1b1	0	0	-0.17	0	0	0	10
4094	G3V8E2;Q4FZS7		Strip1	0	-0.35	0	0	0	0	36		4053	G3V7Y3;P35434	ATP synthase subunit delta, mitochondrial	Atp5d	0	0	-0.22	0	0	0	10
1308	F1M8Y2;F1M9I6;B3STU1;B0BNE7	Tetraspanin	Tspan7	0	-0.35	0	0	0	0	36		4108	G3V8L3;P48679;A0A0G2JTC5;P70482;Q6P6U3;A0A0G2K3R2;A0A1B0GWU9	Prelamin-A/C;Lamin-A/C	Lmna;C2.1	-0.19	0	-0.15	0	0	0	10
3209	D4AE68;P82471;Q45QM4;Q7M0H6	Guanine nucleotide-binding protein G(q) subunit alpha	Gnaq	0	-0.29	-0.22	0	0.06	0	4		4121	G3V8Q6;P12368;A0A0G2K405	cAMP-dependent protein kinase type II-alpha regulatory subunit	Prkar2a	0	0	-0.22	0	0	0	10
321	A0A0G2JWM2;Q5RJQ4	NAD-dependent protein deacetylase sirtuin-2	Sirt2	0	0.2	0	0	0.15	0.21	32		4133	G3V8T7;Q6PCT7		Tdrkh	0	0	-0.14	0	0	0	10
3210	D4AE79		Chmp1a	0	-0.16	0	0	0.49	0	34		4138	G3V8V0;O08697;A0A1B0GWW8	ADP-ribosylation factor-like protein 2	Arl2	0	0	-0.23	0	0	0	10
3214	D4AE96		Ipo7	0	0	-0.11	0	0.31	0.34	17		4146	G3V8Y8;Q8VHU1		Hip1	0	0	-0.17	0	0	0	10
5261	Q03114	Cyclin-dependent-like kinase 5	Cdk5	0	-0.34	0	0	0	0	36		4157	G3V936;Q8VHF5;Q0QEL8	Citrate synthase;Citrate synthase, mitochondrial	Cs	0	0	-0.15	0	0	-0.11	10
5116	P63074;A0A1W2Q627	Eukaryotic translation initiation factor 4E	Eif4e	0	0	0	0	0.17	0.36	17		421	A0A0G2JYU2;Q5XIE3	39S ribosomal protein L11, mitochondrial	Mrpl11	0	-0.12	-0.18	0	0	0	10
4734	Q6IE67;P18422	Proteasome subunit alpha type;Proteasome subunit alpha type-3	Psma3	0	0	0	0	0	0.17	32		4221	I6LBX8;A0A0G2K9D7		Pcdhgc3	0	0	-0.21	0	0	0	10
3222	D4AEH9		Agl	0	0	0	0	0	0.14	32		4225	M0R3M4;D4A054		Ranbp2	0	0	-0.11	0	0	0	10
3223	D4AEI5;A0A0G2K402		Myef2	0	-0.15	0	0	0.18	0.19	15		4233	M0R436		Rnf170	0	0	-0.14	0	0	0	10
3231	D4AEP0	Adenylosuccinate synthetase isozyme 2	Adss	0	-0.33	-0.21	0	0.15	0	4		4286	M0R7F3;A0A0U1RRZ0;A0A0U1RRY0		Wasf3	0	0	-0.21	0	0	0	10
3234	D5MTG9;D3ZQC6		Ubr1	-0.33	0	0	0	0	0	13		4333	M0RAD5	ATP-dependent Clp protease proteolytic subunit	Clpp	0	0	-0.16	0	0.11	0	10
3236	D7NIW0;F1LRN8;A0A0G2JXP3;A0A0G2JUY1;Q5U1Z5;Q6P778		Nedd4l	-0.27	0	0.1	0	0	0	13		4357	M0RC17;O88524		Chl1	0	0	-0.23	0	0	0	10
4918	P47861	Synaptotagmin-5	Syt5	-0.41	0	-0.42	0	0	0	8		4393	O08700	Vacuolar protein sorting-associated protein 45	Vps45	0	0	-0.21	0	0	0	10
3239	E2RUH2;A0A0G2K9E0;P29315	Ribonuclease inhibitor	Rnh1	0	0	0	0	0	0.28	32		4409	O35049;D4A8L3	Sphingomyelin phosphodiesterase 3	Smpd3	0	0	-0.22	0	0	0	10
1139	A0A173DW29;G3V792;Q63100-3;Q63100;A0A173DW41;A0A173DW30;Q63100-4	Cytoplasmic dynein 1 intermediate chain 1	Dync1i1	-0.27	-0.39	0	0	0.26	0.37	16		4412	O35092;Q6P6W9	Mitochondrial import inner membrane translocase subunit Tim17-A	Timm17a	0	0	-0.16	0	0	0	10
3251	E9PT51		Poldip2	-0.29	0	0	0	0	0	13		4416	O35165	Golgi SNAP receptor complex member 2	Gosr2	0	0	-0.15	0	0	0	10
3252	E9PT53;Q9JLT5		Wfs1	0	-0.33	-0.32	0	0	0	4		4434	O35509;A0A0G2JZR4	Ras-related protein Rab-11B	Rab11b	0	0	-0.15	-0.09	0	0	10
3253	E9PT66;B5DF12		Sf3b3	-0.19	-0.19	-0.12	0	0	0.14	20		4519	O88801;O88801-2	Homer protein homolog 2	Homer2	0	0	-0.2	0	0	0	10
3256	E9PT83		Cenpf	0	0	0	0	0	0.23	32		4535	P01041	Cystatin-B	Cstb	0	0	-0.18	0	0	0	10
6963	Q99MZ4	Gamma-glutamyltransferase 7;Gamma-glutamyltransferase 7 heavy chain;Gamma-glutamyltransferase 7 light chain	Ggt7	-0.47	0	0	0	0.21	0	19		4549	Q6P6G9;Q5I0M7;P04256;F1M2S4;D4ACJ7;A0A0G2K3G4;F1M6C7	Heterogeneous nuclear ribonucleoprotein A1;Heterogeneous nuclear ribonucleoprotein A1, N-terminally processed	Hnrnpa1;Hnrpa1	0	0	-0.12	0	0	0	10
2771	D4A1R8		Cpne1	0	-0.34	0	0	0	0	36		4591	P07825;A0A0G2KAD8	Synaptophysin	Syp	0	0	-0.22	0.12	0.17	0	10
3275	E9PTV0		Guk1	-0.23	0	0	0	0	0	13		460	A0A0G2JZK7;F1M9A2;P48768	Sodium/calcium exchanger 2	Slc8a2	0	0	-0.27	0	0	0	10
3281	E9PU28;Q6P9U9	Inosine-5-monophosphate dehydrogenase 2;Inosine-5-monophosphate dehydrogenase	Impdh2	0	0	0	0	0	0.39	1		4648	P10860;Q7TPI5	Glutamate dehydrogenase 1, mitochondrial	Glud1	0	0	-0.28	0	-0.11	-0.14	10
3033	D4A8U7;P28023	Dynactin subunit 1	Dctn1	0	-0.23	0	0	0.27	0.41	22		4672	P12369;Q4KLG5;A0A0G2K5G0	cAMP-dependent protein kinase type II-beta regulatory subunit	Prkar2b	0	0	-0.22	0	0	0	10
1503	B2RYA8;D4ABC2		Dnajb2	0	-0.34	0	0	0	0	36		4699	P14604	Enoyl-CoA hydratase, mitochondrial	Echs1	0	0	-0.12	0	0	0	10
3291	F1LM29;F1LZI7;P58751-3;P58751-2;P58751	Reelin	Reln	0	0	0	0	0	0.61	5		4739	P19103	Protein phosphatase 1 regulatory subunit 1A	Ppp1r1a	0	0	-0.24	0	0	0	10
3288	F1LM09;Q4VSI4	Ubiquitin carboxyl-terminal hydrolase;Ubiquitin carboxyl-terminal hydrolase 7	Usp7	0	-0.15	0	0	0.18	0.3	22		4749	P19511	ATP synthase F(0) complex subunit B1, mitochondrial	Atp5f1	0	0	-0.18	0	0	0	10
3299	F1LM66;Q5EB83;A0A1W2Q6N7		Eftud2	-0.33	-0.2	-0.12	0	0.29	0.37	16		4779	P21913	Succinate dehydrogenase [ubiquinone] iron-sulfur subunit, mitochondrial	Sdhb	0	0	-0.22	0	0	0	10
3304	F1LMD9;P97874	Cyclin-G-associated kinase	Gak	0	-0.2	-0.15	0	0	0	4		4795	P24368	Peptidyl-prolyl cis-trans isomerase B	Ppib	0	0	-0.09	0	0	0	10
3318	F1LMV9;Q5EB67	Coronin	Coro2b	-0.4	-0.47	-0.18	0	0	0	9		480	A0A0G2JZZ4			0	0	-0.15	0	0	0	10
3295	F1LM55;B5DFM4		Ccar2;RGD1309922	0	-0.12	0	0	0.31	0.53	22		4800	Q4FZZ4;P26284;D4A5G8	Pyruvate dehydrogenase E1 component subunit alpha;Pyruvate dehydrogenase E1 component subunit alpha, somatic form, mitochondrial	LOC100365902;Pdha1;Pdha1l1	0	0	-0.2	0	0	0	10
3310	F1LMM8;Q64536;Q9JID3	[Pyruvate dehydrogenase (acetyl-transferring)] kinase isozyme 2, mitochondrial	Pdk2	-0.22	0	0	0	0	0	13		4816	P28572-1;P28572	Sodium- and chloride-dependent glycine transporter 1	Slc6a9	0	0	-0.19	0	0	0	10
4730	P18265;A0A0G2K7W7	Glycogen synthase kinase-3 alpha	Gsk3a	0	-0.34	0	0	0	0	36		4824	P29418;M0R601	ATP synthase subunit epsilon, mitochondrial	Atp5e;LOC100361879	0	0	-0.27	0	0	0	10
7061	Q9JKS6;Q9JKS6-3;Q9JKS6-2	Protein piccolo	Pclo	0	-0.34	0	0	0	0	36		4825	P29419	ATP synthase subunit e, mitochondrial	Atp5i	0	0	-0.16	0	0	0	10
3313	F1LMR7;P46101-2;P46101	Dipeptidyl aminopeptidase-like protein 6	Dpp6	-0.44	-0.42	-0.28	0.07	0	0.12	3		4985	P54921	Alpha-soluble NSF attachment protein	Napa	0	0	-0.2	0	0	0	10
3316	F1LMU7;F1LNE8;P23576	Gamma-aminobutyric acid receptor subunit alpha-2	Gabra2	0	-0.44	-0.18	0	0	0	4		4996	P56571	ES1 protein homolog, mitochondrial		0	0	-0.2	0	0	-0.12	10
3555	F1LWG2		Prmt8	-0.33	-0.44	-0.34	0	0	0	9		502	D3ZMI4;A0A0G2K0F3;Q9WTP0-2;D4A9L5;Q9WTP0;A0A0G2K0B2;D4ACZ4	Band 4.1-like protein 1	Epb41l1	0	0	-0.18	0	0	-0.12	10
3322	F1LMZ4;Q5BJP6	Ribosome-releasing factor 2, mitochondrial	Gfm2	0	-0.34	-0.18	0	0	0	4		5036	P61589;O35791	Transforming protein RhoA	Rhoa	0	0	-0.18	0	0.12	0	10
5024	P60901;A0A0G2K0D7	Proteasome subunit alpha type-6	Psma6	-0.25	0	0	0	0	0	13		5047	P62076	Mitochondrial import inner membrane translocase subunit Tim13	Timm13	0	0	-0.15	0	0	0	10
3327	F1LN45;A7L638		Trpm3	0	0	0	0	0	0.27	32		5067	P62632	Elongation factor 1-alpha 2	Eef1a2	0	0	-0.23	0	0	0	10
7155	Q9Z122;A0A140TAE1	Fatty acid desaturase 2	Fads2	-0.41	0	-0.46	0	0	0	8		5110	P63039	60 kDa heat shock protein, mitochondrial	Hspd1	0	0	-0.09	0	0	-0.12	10
3329	F1LN59;Q5BJU2		Eif4g2	0	0	0	0	0.24	0.46	17		5113	Q9WUW2;P63045	Vesicle-associated membrane protein 2	Vamp2	0	0	-0.26	0	0.14	0	10
3330	F1LN69;A0A0G2JV77;A0A0G2K382;F1LP90;Q5EB61;Q3SYQ1	Misshapen-like kinase 1	Mink1;LOC303259	0	-0.53	-0.32	0	0	0	33		512	A0A0G2K5D4;A0A0G2K0J9;Q5XPT5;P63079	Gamma-aminobutyric acid receptor subunit beta-3	Gabrb3	0	0	-0.13	0	0	0	10
3336	F1LNC4;P58200	Vesicle transport through interaction with t-SNAREs homolog 1B	Vti1b	-0.32	-0.3	0	0	0	0	6		5131	P63259	Actin, cytoplasmic 2;Actin, cytoplasmic 2, N-terminally processed	Actg1	0	0	-0.21	0	0	0	10
3337	F1LNE5;Q4QQR9	Protein MEMO1	Memo1	0	-0.3	-0.19	0	0	0	4		5139	P67779;D3ZFH6	Prohibitin	Phb;Phb-ps1	0	0	-0.19	0	0.07	0	10
5388	Q3B8Q2	Eukaryotic initiation factor 4A-III;Eukaryotic initiation factor 4A-III, N-terminally processed	Eif4a3	-0.21	-0.14	0	0	0.31	0.44	16		5164	P70587-2;F1M4K6;P70587-3;P70587;P70587-5;P70587-4;A0A0A0MXW8;F1LMG7;B8Q4H4;B8Q4H5;B8Q4H3;B8Q4F8;B8Q4G6;B8Q4H0;B8Q4G8;B8Q4G3;B8Q4G4;B8Q4G9;B8Q4G5;B8Q4G2;B8Q4F9;B8Q4H1;B8Q4G1;B8Q4G0;B8Q4H2;B8Q4G7	Leucine-rich repeat-containing protein 7	Lrrc7	0	0	-0.11	0	0	0	10
3346	F1LNL3;Q80ZB2		Abca1	0	0.28	0.3	0	0	0	30		5196	P85834	Elongation factor Tu, mitochondrial	Tufm	0	0	-0.22	0	0	0	10
3686	F1M5M9		Srgap3	-0.2	-0.44	-0.26	0	0	0	9		5205	P97532	3-mercaptopyruvate sulfurtransferase	Mpst	0	0	-0.19	0	0	0	10
3908	G3V6D9;Q920G2	Na(+)/H(+) exchange regulatory cofactor NHE-RF;Na(+)/H(+) exchange regulatory cofactor NHE-RF2	Slc9a3r2	0	-0.34	0	0	0	0	36		5240	Q00566-2;A0A0G2JWK2;Q00566	Methyl-CpG-binding protein 2	Mecp2	0	0	-0.23	0	0	0	10
2569	D3ZWA8		Appl1	0	-0.33	0	0	0	0	36		5241	Q00657;F1LS79	Chondroitin sulfate proteoglycan 4	Cspg4	-0.15	0	-0.23	0	0	0	10
3355	F1LP01;P49621	Diacylglycerol kinase;Diacylglycerol kinase beta	Dgkb	-0.5	-0.64	-0.23	0	0	0.27	3		5263	Q03346	Mitochondrial-processing peptidase subunit beta	Pmpcb	0	0	-0.23	0	0	0	10
3307	F1LMJ8;Q99P63	Calcium uptake protein 2, mitochondrial	Micu2	0	-0.24	0	0	0.38	0.42	22		5283	Q06647	ATP synthase subunit O, mitochondrial	Atp5o	0	0	-0.22	0	0	-0.04	10
3363	F1LP80;P20156;M0RDR2	Neurosecretory protein VGF;VGF(24-63);VGF(180-194);VGF(375-407);Neuroendocrine regulatory peptide-1;Neuroendocrine regulatory peptide-2;TLQP-11;TLQP-21;TLQP-30;TLQP-62;HFHH-10;AQEE-30;LQEQ-19	LOC100909521;Vgf	0	0.17	0.29	0	0.29	0	30		5321	Q10473	Polypeptide N-acetylgalactosaminyltransferase 1;Polypeptide N-acetylgalactosaminyltransferase 1 soluble form	Galnt1	0	0	-0.27	0	0	0	10
3364	F1LPA3;Q76M68	IQ motif and SEC7 domain-containing protein 3	Iqsec3	-0.55	-0.45	-0.21	0	0.17	0	3		5352	Q2TA68-3;Q2TA68-2;Q2TA68	Dynamin-like 120 kDa protein, mitochondrial;Dynamin-like 120 kDa protein, form S1	Opa1	0	0	-0.11	0	0.08	-0.08	10
3046	D4A994		Emc1	0	0	0	0	0.32	0.3	17		539	A0A0G2K121;Q5FVQ4	Malectin	Mlec	0	0	-0.19	0	0	0	10
3367	F1LPB9;P47709;A0A0G2K8B5;P70610	Rabphilin-3A;Double C2-like domain-containing protein beta	Rph3a;Doc2b	-0.27	-0.24	0	0	0	0	6		5474	Q499S6		Ctsf	0.35	0	-0.26	0.28	0	0	10
3369	F1LPC6;Q9JHW1;A0A0G2JY30;Q9JHW1-2	Carboxypeptidase D	Cpd	-0.28	-0.33	-0.23	0	0	0.45	37		5501	Q4G069;A0A0G2K167	Regulator of microtubule dynamics protein 1	Rmdn1	0	0	-0.19	0	0	0	10
3374	F1LPG3;O88588;O88588-2;I6LL99	Phosphofurin acidic cluster sorting protein 1	Pacs1	0	-0.4	-0.2	0	0	0.06	4		559	A0A0G2K1G1;Q3SWT5	Solute carrier family 41 member 3	Slc41a3	0	0	-0.24	0	0	0	10
3375	F1LPG5;F1M7T1;Q2XTA8;D3ZV29;D3ZQH7;F1M7Z4		LOC688963;LOC100361934;Ndufb4;Ndufb4l1;RGD1560088;LOC687864	0	0	-0.27	0	0	0	28		568	F1LNM0;A0A0G2K1M2;Q62696	Disks large homolog 1	Dlg1	0	0	-0.17	0	0	0	10
470	A0A0G2JZS5;Q7TS62;P53563-3;P53563;Q9WUI5;Q548R7;E9PU78;P53563-2;Q5K547	Bcl-2-like protein 1	Bcl2l1;Bcl2l1-ps1;bcl-X	0	-0.33	0	0	0	0	36		5708	Q5BJZ3		Nnt	0	0	-0.18	0	0	0	10
3380	F1LPK7;Q63598;Q562B2	Plastin-3	Pls3	0	0	0.13	0	0	0	25		5730	Q5EAN5;Q9ET20	Secretory carrier-associated membrane protein 4	Scamp4	0	0	-0.21	0	0	0	10
3384	F1LPP6;P24587	A-kinase anchor protein 5	Akap5	0	-0.81	-0.64	-0.16	-0.26	0	2		5797	Q5HZY0;A9CMB3;A9CMB5;A9CMB4	UBX domain-containing protein 4	Ubxn4;Ubxd2	0	0	-0.11	0	0	0	10
3387	F1LPQ9;Q5U301;A0A096MJ48	A-kinase anchor protein 2	Akap2	0	-0.29	0	-0.44	0	0	29		5804	Q5I0D5	Phospholysine phosphohistidine inorganic pyrophosphate phosphatase	Lhpp	0	0	-0.24	0	0	0	10
3390	F1LPV0		Nars	0	0	0	0	0	0.47	1		5825	Q5M7T4	Protein YIPF4	Yipf4	0	0	-0.12	0	0	0	10
2420	D3ZS58	NADH dehydrogenase [ubiquinone] 1 alpha subcomplex subunit 2	Ndufa2	-0.56	-0.3	0	0	0	0	27		5834	Q5M818;A8USQ2;Q6PEC2	39S ribosomal protein L16, mitochondrial	Mrpl16	0	0	-0.17	0	0	0	10
3393	F1LQ09;Q562A0		Atl2	0	-0.21	0	0	0.3	0	10		5861	Q5M9F7		Actr10	0	0	-0.16	0	0.16	0	10
3738	F1M842		Tp53bp1	-0.35	-0.42	-0.12	0	0	0	9		5890	Q5PQK2		Fus	0	0	-0.17	0	0	0	10
3403	F1LQC1;P07872-2;P07872;F1M609	Acyl-coenzyme A oxidase;Peroxisomal acyl-coenzyme A oxidase 1;Peroxisomal acyl-CoA oxidase 1, A chain;Peroxisomal acyl-CoA oxidase 1, B chain;Peroxisomal acyl-CoA oxidase 1, C chain	Acox1	-0.21	0	0	0	0	0	13		5891	Q5PQK5;Q5WQV5;E9PT65;T1SRT4;A0A0G2K095		Rdx	0	0	-0.1	0	0	0	10
3408	F1LQF5;Q3KR85		Ubac2	0	0	0	0	0	0.56	5		5893	Q5PQL7	Integral membrane protein 2C;CT-BRI3	Itm2c	0.26	0	-0.24	0	0	0	10
3409	F1LQI1;O35952;O35952-2	Hydroxyacylglutathione hydrolase, mitochondrial	Hagh	-0.25	-0.29	0	0	0	0	6		590	A0A0G2K214			0	0	-0.11	0	0	0	10
3410	F1LQI2;A0A0G2JW21;O55005	Roundabout homolog 1	Robo1	-0.24	-0.63	-0.49	-0.15	0	0	18		5928	Q5RJR2	Twinfilin-1	Twf1	0	0	-0.19	0	0.14	0	10
3411	F1LQI6		Zer1	-0.56	-0.35	0	0	0	0.31	37		5940	Q5RK17;D4A7Z5		Diablo;LOC100360940	0	0	-0.25	0	0	0	10
3414	F1LQN1;Q5BJS5	Polypeptide N-acetylgalactosaminyltransferase	Galnt16	0	0	0	0	0	0.81	5		595	A0A0G2K261			0	0	-0.19	0	0	-0.13	10
3415	F1LQN3;Q9JK11;Q5U1Z3	Reticulon;Reticulon-4	Rtn4	0	-0.07	0	0	0.12	0	10		599	A0A0G2K293;D4A2V0;Q9Z0J8	Neuronal growth regulator 1	Negr1	0	0	-0.23	0	0	0	10
3420	Q6P790;F1LQS3;P21533;A0A0G2KBA1	60S ribosomal protein L6	Rpl6	0	0	0	0	0	0.29	32		5992	Q5U2R4	Mitochondrial ribonuclease P protein 1	Trmt10c	0	0	-0.24	0	0	0	10
3424	F1LQY6		Necab2	0	-0.53	-0.46	0	0	0	33		5995	Q5U2R9		Scfd2	0	0	-0.17	0	0	0	10
3928	G3V6L4;A0A0G2K070	Kinesin-like protein	Kif5c	-0.49	-0.23	-0.14	0.14	0.39	0	19		6000	Q5U2U0	ATP-dependent Clp protease ATP-binding subunit clpX-like, mitochondrial	Clpx	0	0	-0.1	0	0	0	10
1561	B2RYS2	Cytochrome b-c1 complex subunit 7	LOC685596	-0.4	0	-0.29	0	0	0	8		6016	Q5U302;A0A0G2JYF7		Ctnna1	0	0	-0.14	0	0	0	10
908	A0A0G2K9C5;A1L1I3;Q3MUI2	Numb-like protein	Numbl	-0.56	-0.37	0	0	0	0	27		6032	Q5U3Z5		Bri3bp	0	0	-0.25	0	0	0	10
3431	F1LR39;Q499N3;A0A1W2Q6Q7	WD repeat-containing protein 18	Wdr18	0	0	0	0	0	0.4	1		6061	Q5XI32;A0A0G2JYB1	F-actin-capping protein subunit beta	Capzb	0	0	-0.15	0.08	0.1	0	10
3508	F1LTW9		Efr3b	-0.55	0	0	0	0.24	0	26		6107	Q5XIF3	NADH dehydrogenase [ubiquinone] iron-sulfur protein 4, mitochondrial	Ndufs4	0	0	-0.26	0	0	0	10
4705	P14925;P14925-3;P14925-4;P14925-5;P14925-2;P14925-6;P14925-7	Peptidyl-glycine alpha-amidating monooxygenase;Peptidylglycine alpha-hydroxylating monooxygenase;Peptidyl-alpha-hydroxyglycine alpha-amidating lyase	Pam	0.71	0.26	0	0	0	0	31		6113	Q5XIG4	OCIA domain-containing protein 1	Ociad1	0	0	-0.09	0	0	0	10
3439	F1LRB8;P18298;Q6P688;F1LZ34;A0A0G2K248;P13444	S-adenosylmethionine synthase;S-adenosylmethionine synthase isoform type-2;S-adenosylmethionine synthase isoform type-1	LOC100363915;Mat2a;Mat1a	0	0	0	0	0.39	0	34		6120	Q5XIH7;A0A0G2KB63	Prohibitin-2	Phb2	0	0	-0.19	0	0	-0.09	10
2380	D3ZQL1		Emc7	0	0	0	0	0.52	0.71	11		6125	Q5XIJ3;P41565	Isocitrate dehydrogenase [NAD] subunit, mitochondrial;Isocitrate dehydrogenase [NAD] subunit gamma 1, mitochondrial	Idh3g	0	-0.11	-0.25	0	0	0	10
3446	F1LRI7;P0C1X8	AP2-associated protein kinase 1	Aak1	0	-0.28	-0.23	0	0	0	4		6137	Q5XIN6	LETM1 and EF-hand domain-containing protein 1, mitochondrial	Letm1	0	0	-0.14	0	0	-0.06	10
3450	F1LRL4;B2GV11		Tbc1d9b	0	0	0	0	0	0.75	5		6206	Q62936;A0A096MJ42;Q62936-2;A0A0G2K0Y9;A0A096MJR5	Disks large homolog 3	Dlg3	0	0	-0.22	0	0	0	10
3451	F1LRL9;P15205;B0BNK3	Microtubule-associated protein 1B;MAP1B heavy chain;MAP1 light chain LC1	Map1b;Mtap1b	-0.43	-0.36	0	0.09	0.24	0.28	37		6210	Q62991	Sec1 family domain-containing protein 1	Scfd1	0	0	-0.18	0	0	0	10
3796	F1MA97		Thsd7a	-0.23	-0.5	-0.31	0	0	0	9		6220	Q63083;Q6P6Q3	Nucleobindin-1	Nucb1	0	-0.13	-0.16	0	0	0	10
3461	F1LRV4;O88600	Heat shock 70 kDa protein 4	Hspa4	0	-0.18	-0.16	0	0	0	4		6298	Q64057	Alpha-aminoadipic semialdehyde dehydrogenase	Aldh7a1	0	-0.1	-0.2	0	0	0	10
3462	F1LRV6;Q9Z244	GMP reductase;GMP reductase 1	Gmpr	0	-0.23	0	0	0.21	0	10		6325	Q642E3;Q9JLH7;D4A1S2	CDK5 regulatory subunit-associated protein 3	Cdk5rap3;Prdm1	0	0	-0.26	0	0	0	10
6658	Q6P6S0	Synaptosomal-associated protein 47	Snap47	-0.55	0	0	0	0	0	26		6334	Q64548	Reticulon-1	Rtn1	0	0	-0.17	0	0	0	10
3467	F1LRZ7;P16884	Neurofilament heavy polypeptide	Nefh	0	-0.28	0	-0.09	0	0	29		6376	R9PXU1;Q66HC3	Protein C9orf72 homolog	RGD1359108	0	0	-0.23	0	0	0	10
3468	F1LRZ9;A1L117		Rundc3a	-0.25	-0.21	0	0	0	0	6		6383	Q66HF3;Q6UPE1	Electron transfer flavoprotein-ubiquinone oxidoreductase, mitochondrial	Etfdh	0	0	-0.15	0	0	0	10
3362	F1LP76;Q8VHU4	Elongator complex protein 1	Ikbkap	0	-0.16	-0.12	0	0.35	0.51	22		6424	Q68FU3	Electron transfer flavoprotein subunit beta	Etfb	0	0	-0.19	0	0	-0.13	10
3478	F1LSG8;Q5BJX6;D3ZTE2		Ccdc132;LOC100911994	-0.21	0	0	0	0	0	13		6435	Q68FX8;F1M964;P20069	Mitochondrial-processing peptidase subunit alpha	Pmpca	0	0	-0.16	0	0	0	10
3483	F1LSM0	Ubiquitin carboxyl-terminal hydrolase	Usp24	0	-0.34	-0.16	0	0	0	4		6437	Q68FY0	Cytochrome b-c1 complex subunit 1, mitochondrial	Uqcrc1	0	0	-0.1	0	0.06	-0.07	10
3489	F1LSR8;Q8CFG5	Voltage-dependent calcium channel subunit alpha-2/delta-3;Voltage-dependent calcium channel subunit alpha-2-3;Voltage-dependent calcium channel subunit delta-3	Cacna2d3	-0.29	-0.39	-0.15	0.23	0.26	0	9		6444	Q68HB5;Q68HB6;Q68HB8;Q68HB7		Pcdh7	0	0	-0.2	0	0	0	10
3494	F1LSY2;O35764	Neuronal pentraxin receptor	Nptxr	-0.28	0	0	0	0	0	13		6460	Q6AXV4	Sorting and assembly machinery component 50 homolog	Samm50	0	0	-0.15	0	0	0	10
3498	F1LT36;P63326;D3ZH53;A0A0H2UI18;D3ZJY5;D3ZCN9	40S ribosomal protein S10	RGD1564698;Rps10;RGD1561871;LOC100360905;RGD1560073	0	0	0	0	0	0.24	32		6467	Q6AY02		Rbm17	0	0	-0.22	0	0	0	10
3500	F1LT49		Lrrc47	0	0	-0.11	0	0	0	28		6469	Q6AY04	Uncharacterized protein C2orf47 homolog, mitochondrial		0	0	-0.26	0	0	0	10
2523	D3ZUV9		Cnot3	-0.54	0	0	0	0	0	26		6477	Q6AY23	Pyrroline-5-carboxylate reductase 2	Pycr2	0	0	-0.19	0	0	0	10
3819	F1MAR6;A0A0G2K2S1;B4F7D0		Prodh	0	-0.33	0	0	0	0	36		6552	Q6AYS3		Ctsa	0	0	-0.24	0.2	0	0	10
7178	Q9Z2I7;A0A0G2JZX3	Synaptic vesicle 2-related protein	Svop	0	-0.33	0	0	0	0	36		6556	Q6AYT0	Quinone oxidoreductase	Cryz	0	0	-0.16	0	0.15	0	10
6501	Q6AY86;A0A0G2JXT0	Vacuolar protein sorting-associated protein 26A	Vps26a	0	-0.33	0	0	0	0	36		6575	Q6EV70	GDP-fucose protein O-fucosyltransferase 1	Pofut1	0	0	-0.25	0	0	0	10
2883	D4A4T9	Cysteine and histidine-rich domain-containing protein 1	Chordc1	0	-0.32	0	0	0	0	36		6597	Q6IRF8;O54715	V-type proton ATPase subunit S1	Atp6ap1	0	0	-0.17	0.11	0	0	10
3525	F1LUT4;A0A0G2KAZ5	Phospholipid-transporting ATPase	Atp8a1	-0.33	-0.23	-0.06	0	0.11	0.18	37		6634	Q6MGB5;A0A0G2K6P1;Q5BJM1	Estradiol 17-beta-dehydrogenase 8	Hsd17b8	0	0	-0.18	0	0	0	10
3528	F1LV13;F1M3D3;Q62826;Q62826-2;A0A0G2JZ75;Q9WV78	Heterogeneous nuclear ribonucleoprotein M;Plasmalemma vesicle-associated protein	Hnrnpm;Plvap	-0.21	-0.13	0	0	0.16	0.24	37		6639	Q6NYB7	Ras-related protein Rab-1A	Rab1A	0	0	-0.19	0	0	0	10
1543	B2RYN1		Fn3krp	0	-0.32	0	0	0	0	36		6655	Q6P6Q9;F1LNV5;A0A0G2K0T5	Calcium uptake protein 1, mitochondrial	Micu1	0	0	-0.22	0	0	0	10
3533	F1LV89;Q5EB70		Rap1gap	-0.25	-0.32	-0.22	0	0	0.28	37		6656	Q6P6R2	Dihydrolipoyl dehydrogenase, mitochondrial	Dld	0	0	-0.25	0	0	0	10
354	A0A0G2JXC9;Q62751	Iron-responsive element-binding protein 2	Ireb2	0	0	0	0.3	0	0	25		6685	Q6P9V1;Q62745	Tetraspanin;CD81 antigen	Cd81	0	0	-0.2	0	0	0	10
3956	Q6P7D2;G3V6V1;O09175	Aminopeptidase B	Rnpep	0	-0.32	0	0	0	0	36		6697	Q6PDU2		Mrps18a	0	0	-0.17	0	0	0	10
3547	F1LVZ9		Hectd3	0	0	-0.25	0	0	0.34	1		6766	Q75Q39;R9PXR4	Mitochondrial import receptor subunit TOM70	Tomm70a	0	-0.14	-0.15	0	0	-0.1	10
355	A0A0G2JXD0;Q6P9U5;P17077;A0A0G2JX41;F1M7A9;M0R6B4	60S ribosomal protein L9	Rpl9;RGD1561928;LOC100910002	0	0	0	0	0.09	0.4	1		6804	Q7TP42		Sec62	0	0	-0.2	0	0	0	10
3550	F1LW74		Iqgap2	0	-0.43	0	0	0.12	0.34	15		6808	Q7TP77		Mrpl49	0	0	-0.17	0	0	0	10
3551	F1LW77		Rab33b	0	0	0	0	0	0.24	32		6810	Q7TP91;Q9QXU2;D4A1D8	Surfeit locus protein 1	Surf4;Surf1	0	0	-0.14	0	0	0	10
3554	F1LWE6		Msi2	0	0	0	0	0	0.25	32		6842	Q80Z30	Protein phosphatase 1E	Ppm1e	0	0	-0.22	0	0.2	0	10
388	A0A0G2JY26;D4A0I5		Dnajc6	-0.28	-0.38	-0.14	0	0	0	9		6914	Q8VIL3;B3SVE5	ZW10 interactor	Zwint	0	0	-0.09	0	0	0	10
1983	D3ZCI5		Stxbp6	0	-0.32	0	0	0	0	36		6915	Q91V33	KH domain-containing, RNA-binding, signal transduction-associated protein 1	Khdrbs1	0	0	-0.13	0	0	0	10
652	A0A0G2K3D9;M0R9H6;F1LVX6		Tmem132b	0	-0.32	0	0	0	0	36		7047	Q9JJL4	Rho-related GTP-binding protein RhoQ	Rhoq	0	0	-0.18	0	0	0	10
3560	F1LWN1		Ncoa7	0	0	-0.28	0	0	0	28		7064	Q9JLA3	UDP-glucose:glycoprotein glucosyltransferase 1	Uggt1	0	0	-0.16	0	0	0	10
3566	F1LX07;A0A0G2K2J7		Slc25a12	0	0	-0.25	0	0	0	28		7075	Q9NQR8;D4ABZ8	NADH dehydrogenase [ubiquinone] 1 alpha subcomplex assembly factor 4	Ndufaf4	0	0	-0.27	0	0	0	10
3570	F1LXA0		Ndufa12	0	-0.18	0	0	0.09	0	29		7096	Q9QYU2;M0R4P2	Elongation factor Ts, mitochondrial	Tsfm	0	0	-0.12	0	0	0	10
3573	F1LXF5		Get4	0	-0.2	0	0	0.2	0	10		7139	Q9WV97	Mitochondrial import inner membrane translocase subunit Tim9	Timm9	0	0	-0.12	0	0	0	10
3575	F1LXQ7		Arhgap21	0	-0.28	-0.14	0	0	0	4		7143	Q9WVI4;Q8CH90;Q8R5L4;O35798	Guanylate cyclase soluble subunit alpha-2	Gucy1a2	0	0	-0.27	0	0	0	10
708	A0A0G2K4T3;Q5FVC7	Arf-GAP with coiled-coil, ANK repeat and PH domain-containing protein 2	Acap2	0	-0.31	0	0	0	0	29		7145	Q9WVK7	Hydroxyacyl-coenzyme A dehydrogenase, mitochondrial	Hadh	0	0	-0.15	0	0	0	10
359	A0A0G2JXG3;Q6AY41	Cell cycle control protein 50A	Tmem30a	0	-0.16	0	0.13	0	0	29		716	D3ZJH9;A0A0G2K502	Malic enzyme	Me2	0	0	-0.2	0	0	0	10
3592	F1LYQ8	FERM, RhoGEF and pleckstrin domain-containing protein 1	Farp1	0	0	0	0	0	0.34	1		721	A0A0G2K536;Q7TT47	Paraplegin	Spg7	0	0	-0.17	0	0	0	10
3595	F1LZ38		Tenm4	-0.22	-0.24	0	0	0	0	6		768	A0A0G2K6D5;D3ZUF9		Pitrm1	0	0	-0.23	0	0	0	10
6574	Q6DUV1;P09216;F1LMV8;Q63432;A0A0G2JXV8	Protein kinase C epsilon type;Protein kinase C	Prkce	-0.52	-0.76	-0.32	0.2	0.22	0.38	21		773	A0A0G2K6F2;F1M620		Csmd2	0	0	-0.2	0	0	0	10
7123	Q9WTT7	Basic leucine zipper and W2 domain-containing protein 2	Bzw2	0	-0.31	0	0	0	0	29		847	A0A0G2K7X0;Q5PPH9;F7EL36;P49911	Acidic leucine-rich nuclear phosphoprotein 32 family member A	Anp32a	0	0	-0.16	0	0	0	10
3167	D4AD15;D3ZU13;M0RD03		Eif4g1;LOC100911431;LOC100912571	-0.29	-0.16	0	0	0.35	0.43	16		885	G3V743;A0A0G2K8S6;O88941	Mannosyl-oligosaccharide glucosidase	Mogs	0	0	-0.19	0	0	0	10
3606	F1LZX9;A0A0G2JVZ6		Itgav	0	0	0	0	0	0.27	32		906	A0A0G2K9B4;D4A4B1		Mrpl15	0	0	-0.18	0	0	0	10
2724	D4A0C3		Hid1	-0.35	-0.24	0	0.24	0.42	0	19		1005	A0A0G2QC21;A3KMH4		Arhgef7	0	0.16	0	0	0.22	0	11
3366	F1LPB8;Q6P6S9	Ectonucleoside triphosphate diphosphohydrolase 5	Entpd5	0	0	0	0	0.25	0.32	17		2515	D3ZUP5		Brk1	0	0	0	0	0.12	0	11
3623	F1M0Z1;A0A1P0PBZ6		Trio	0	0	-0.13	0	0.16	0.18	32		104_m	A0A0G2JSH9;P35704	Peroxiredoxin-2	Prdx2	0	0	-0.1	0	0.18	0	11
3624	F1M0Z3;H1UBM8		Cpne4	-0.37	-0.6	-0.39	0.13	0	0	18		1050	A0A0H2UHQ3;B5DFH2;P0C5W1	Microtubule-associated protein 1S;MAP1S heavy chain;MAP1S light chain	Map1s	0	0	-0.1	0	0.19	0	11
3631	F1M1B3		RGD1564420	0	0	0	0	0	0.25	32		1070	A0A0H2UHX1;A1L1I6;Q6RJR6-2	Reticulon;Reticulon-3	Rtn3	0	0	-0.18	0	0.25	0	11
3633	F1M1D5		Tbcd	0	0	0	0	0	0.23	32		3583	F1LY09		Actr3b	0	0	0	0	0.12	0	11
3634	F1M1E4;A0A0G2K0Y5;D3ZXB0		Pnkd	-0.33	0	0	0	0	0	13		3595	F1LZ38		Tenm4	0	0	0	0	0.12	0	11
3636	F1M1L9;H1UBM7		Cpne2	0	-0.29	-0.22	0	0	0	4		4989	P55161;F1LSM5;Q32PY0;Q562B3	Nck-associated protein 1	Nckap1	0	0	0	0	0.12	0	11
4585	P07483	Fatty acid-binding protein, heart	Fabp3	0	-0.31	0	0	0	0	29		5188	P84087	Complexin-2	Cplx2	0	0	0	0	0.12	0	11
3652	F1M392		Limch1	-0.25	-0.26	0	0	0	0	6		6294	Q63942	GTP-binding protein Rab-3D	Rab3d	0	0	0	0	0.12	0	11
3655	F1M3D2;M0RDT6		Dmwd	0	0	0	0	0	0.43	1		2191	D3ZJ01		RGD1307235	0	0	0	0	0.13	0	11
4686	P13264-2;A0A0G2KAN7	Glutaminase kidney isoform, mitochondrial;Glutaminase kidney isoform 68 kDa chain;Glutaminase kidney isoform 65 kDa chain	Gls	0	-0.31	0	0	0	0	29		2861	D4A465;A0A1B0GWT7		Lamtor2	0	0	0	0	0.13	0	11
3659	F1M3H8		Hnrnpa0	-0.31	-0.18	0	0	0	0.23	37		3623	F1M0Z1;A0A1P0PBZ6		Trio	0	0	0	0	0.13	0	11
3660	F1M3J7;A0A0G2K6L9		Cntnap4	0	0	0	0	0.2	0	10		1531	B2RYJ7		Actr1b	0	0	-0.17	0	0.18	0	11
3661	F1M3L7	Epidermal growth factor receptor kinase substrate 8	Eps8	-0.22	0	0	0	0	0	13		1602	B2RZ72		Arpc4	0	-0.14	-0.07	0	0.14	0	11
6880	Q8K3X8	Heat shock factor-binding protein 1	Hsbp1	0	-0.31	0	0	0	0	29		4453	O35964	Endophilin-A2	Sh3gl1	0	0	0	0	0.13	0	11
3664	F1M3W5		Dmxl2	0	-0.39	-0.3	0	0	0	33		6722	Q6RUV5;A0A0G2K0X4	Ras-related C3 botulinum toxin substrate 1	Rac1	0	0	0	0	0.13	0	11
3668	F1M471		Epm2aip1	0	0	0	0	0.31	0.4	17		1754	B5DFF4		Vps37c	-0.11	0	0	0	0.11	0	11
3667	F1M446		AI314180	0	-0.25	0	0	0.51	0.54	11		1785	B6DYQ5;Q9Z339;Q6AXR6;A0A096MJ04	Glutathione S-transferase omega-1	Gsto1	0	0	-0.18	0	0.2	0	11
4559	P05197;Q8K1G4	Elongation factor 2	Eef2	0	-0.15	-0.17	0.19	0.39	0.61	11		1878	D3Z981		Plxna1	0	0	0.08	0	0.15	0	11
1313	B0BNG0;A0A0A0MXU4	ER membrane protein complex subunit 2	Emc2	-0.33	-0.1	0	0	0.23	0.39	16		1648	B4F774		Gdap1l1	0	0	0	0	0.14	0	11
3673	F1M4H5		Nova2	0	0	0	0	0	0.73	5		382	A0A0G2JY03			0	0	0	0	0.14	0	11
3676	F1M4J1		LOC100294508	0	0	0	0	0	0.32	1		213	A0A0G2JUC7;Q6AYH5	Dynactin subunit 2	Dctn2	0	-0.15	0	0.12	0.21	0	11
3678	F1M4N6		Dock3	0	0	-0.32	0	0	0	14		4024	G3V7L8;Q6PCU2;D3ZJ78	V-type proton ATPase subunit E 1	Atp6v1e1;Atp6v1e2	0	0	0	0	0.14	0	11
4868	P35465	Serine/threonine-protein kinase PAK 1	Pak1	0	-0.31	0	0	0	0	29		4488	O70593	Small glutamine-rich tetratricopeptide repeat-containing protein alpha	Sgta	0	0	0	0	0.14	0	11
4168	G3V982;Q5FVI2		Elmo2	-0.34	-0.53	-0.24	0	0	0	9		4656	P11348	Dihydropteridine reductase	Qdpr	0	0	0	0	0.14	0	11
4839	P31647	Sodium- and chloride-dependent GABA transporter 3	Slc6a11	0	-0.31	0	0	0	0	29		4803	Q6GT74;P26453-2;P26453	Basigin	Bsg	0	0	0	0	0.14	0	11
6335	Q64548-2	Reticulon-1	Rtn1	-0.56	-0.43	-0.12	0	0	0	27		4857	P35284;A0A0G2JYB0;D4A376	Ras-related protein Rab-12	Rab12	0	0	0	0	0.14	0	11
3702	F1M6P8		Edil3	0.18	0.4	0	0	0	0	12		497	A0A0G2K0B4;A0A0G2K8P3;Q62940	E3 ubiquitin-protein ligase NEDD4	Nedd4	0	0	0	0	0.14	0	11
3706	F1M6V8;B5DF70;A0A0G2JX43		Strn4	-0.36	-0.37	0	0	0	0	6		6420	Q68FT1	Ubiquinone biosynthesis protein COQ9, mitochondrial	Coq9	0	0	0	0	0.14	0	11
3707	F1M6W2;Q6UPR8	Endoplasmic reticulum metallopeptidase 1	Ermp1	0	-0.13	0	0	0.23	0.17	10		1978	D3ZYN2;D3ZCG2;D3ZSN6;D3ZJJ7;D4A1V5;D4ADI4	Kinesin-like protein	Kif21a	0	0	0	0	0.15	0	11
371	A0A0G2JXN8;B5DF26		Osbpl8	-0.25	-0.26	0	0	0	0	6		2165	D3ZI16		Cops6	0	0	0	0	0.15	0	11
4592	P07895;C8CHS6	Superoxide dismutase [Mn], mitochondrial	Sod2	0	-0.31	0	0	0	0	29		2527	D3ZUY0;A0A1B0GWW7		Rdh14	0	0	0	0	0.15	0	11
3712	F1M779;P11442	Clathrin heavy chain;Clathrin heavy chain 1	Cltc	0	-0.11	-0.15	0	0.05	0.08	28		5023	P60892;A0A0G2JSV3;M0RBK1	Ribose-phosphate pyrophosphokinase 1	Prps1;Prps1l1	0	0	0	0	0.15	0	11
3713	F1M787;O35116	Catenin delta-2	Ctnnd2	-0.22	0	0	0	0	0	13		611	A0A0G2K2L8;Q62915;O35807	Peripheral plasma membrane protein CASK	Cask;mdg2	0	0	0	0	0.15	0	11
3716	F1M7B8;A0A0G2JTH7		Ube3a	0	0	0	0	0	0.64	5		6162	Q62636;O08814	Ras-related protein Rap-1b	Rap1b	0	0	0	0	0.15	0	11
3717	F1M7K7;Q8VHW5	Voltage-dependent calcium channel gamma subunit;Voltage-dependent calcium channel gamma-8 subunit	Cacng8	0	-0.47	-0.25	0	0	0	33		3429	F1LR18;P18890	Rho GTPase-activating protein 39	Arhgap39	0	0	0	0	0.16	0	11
3723	F1M7Q7;Q498M3;Q5XI11		Otud4	0	0	0	0	0.33	0	34		5071	P62744	AP-2 complex subunit sigma	Ap2s1	0	0	0	0	0.16	0	11
3429	F1LR18;P18890	Rho GTPase-activating protein 39	Arhgap39	-0.39	0	-0.37	0	0	0	8		2609	D3ZX38		Pfdn1	0	-0.2	0	0	0.2	0	11
3727	F1M7V6;Q1WIM1	Cell adhesion molecule 4	Cadm4	-0.35	-0.12	0	-0.09	0	0	13		5390	Q3C2P8;A0A0G2K1D0	Sprouty-related, EVH1 domain-containing protein 2	Spred2	0	0	0	0	0.16	0	11
3731	F1M7Y5;Q9R1X8	Protein kinase C iota type	Prkci	-0.41	0	0	0	0	0	13		2726	D4A0E8	Protein arginine N-methyltransferase 5	Prmt5	0	0	0.13	0	0.16	0	11
3735	F1M820		Sorbs1	0	0	-0.38	0	0	0	14		2746	D4A133;A0A1W2Q6N0		Atp6v1a	0	-0.09	-0.09	0.08	0.14	0	11
3737	F1M836;A0A0G2JU56;Q8VHF0;A0A1B0GWN5	MAP/microtubule affinity-regulating kinase 3	Mark3	0	0	-0.22	0	0	0	28		5789	Q5HZA4	LysM and putative peptidoglycan-binding domain-containing protein 1	Lysmd1	0	0	0	0	0.16	0	11
4188	G3V9M3;Q5BJR0		Wdr47	-0.29	-0.41	-0.18	0	0	0	9		2858	D4A435		Icam5	0	0.1	0	0	0.13	0	11
3739	F1M853		Rrbp1	0	0.13	0.13	0	0	0	25		5802	Q5I0D1	Glyoxalase domain-containing protein 4	Glod4	0	0	0	0	0.16	0	11
3740	F1M863;Q91Z80;Q562A3	Liprin-alpha-4	Ppfia4	0	0	-0.2	0	0	0	28		6145	Q5XIR9	Ubiquitin-associated domain-containing protein 1	Ubac1	0	0	0	0	0.16	0	11
3741	F1M888;P83900	Rap guanine nucleotide exchange factor 5	Rapgef5	0	-0.47	-0.21	0	0	0	33		7131	Q9WUD9-2;Q9WUD9	Proto-oncogene tyrosine-protein kinase Src	Src	0	0	0	0	0.16	0	11
5773	Q5FVQ9;A0A0G2K191	Tubulin-specific chaperone E	Tbce	0	-0.31	0	0	0	0	29		6524	Q6AYG3	Protein prune homolog	Prune	0	0	0	0	0.17	0	11
3748	F1M8H6;Q3MID5;Q5I6B8	Phosphatidylinositol 4-phosphate 5-kinase type-1 gamma	Pip5k1c	0	0	-0.21	0	0	0	28		108	A0A0G2JSJ2;Q4KM73;A0A0G2JTN5	UMP-CMP kinase	Cmpk1	0	0	0	0	0.18	0	11
375	D4A8D5;A0A0G2JXT8		Flnb	0	0	0	0	0	0.23	32		1382	B1H2A2		Fsd1	0	0	0	0	0.18	0	11
3750	F1M8K0;D9IFS3;Q91XP6		Dag1	-0.32	0	0	0	0	0	13		3209	D4AE68;P82471;Q45QM4;Q7M0H6	Guanine nucleotide-binding protein G(q) subunit alpha	Gnaq	0	0	0	0.09	0.15	0	11
3753	F1M8P2		Zyg11b	0	0	0	0	0	0.56	5		234	A0A0G2JUT1;Q6AYP5;Q6AYP5-2		Cadm1	0	0	0	0	0.18	0	11
3756	F1M8V2		Ube4b	0	0	0	0	0	0.74	5		3306	F1LMH0;Q9WU34;Q9WU34-3;Q9WU34-2	Neuronal-specific septin-3	Sept3	0	-0.12	0	0	0.23	0	11
3099	D4AB03		Fam120a	-0.31	0	0	0	0.13	0.45	16		3330	F1LN69;A0A0G2JV77;A0A0G2K382;F1LP90;Q5EB61;Q3SYQ1	Misshapen-like kinase 1	Mink1;LOC303259	0	0	-0.13	0	0.24	0	11
3762	F1M953;P48721	Stress-70 protein, mitochondrial	Hspa9	0	0	0	0.08	0.08	0	25		3409	F1LQI1;O35952;O35952-2	Hydroxyacylglutathione hydrolase, mitochondrial	Hagh	0	0	0	0.09	0.16	0	11
382	A0A0G2JY03			0	-0.31	0	0	0	0	29		2941	D4A6D9		Hs1bp3	0	0	0	0	0.18	0	11
1508	B2RYC9	Glucosylceramidase	Gba	-0.4	0	0	0	0.24	0.3	16		3079	D4AA63		Ubqln2	0	0	0	0	0.18	0	11
3444	F1LRI5;B5DFK9		Gcn1l1	0	0	0	0.29	0.35	0.6	11		3461	F1LRV4;O88600	Heat shock 70 kDa protein 4	Hspa4	0	-0.15	-0.1	0.08	0.15	0	11
3781	F1M9V7;Q3B8Q9;Q8VID2		Npepps	0	-0.36	-0.24	0	0	0	4		3446	F1LRI7;P0C1X8	AP2-associated protein kinase 1	Aak1	0	0	0	0	0.18	0	11
3782	F1M9W9;B2GV66		Trappc8;RGD1309102	0	0	0	0	0.16	0	10		4262	M0R617;Q62985-2;Q62985	SH2B adapter protein 1	Sh2b1	0	0	0	0	0.18	0	11
3787	F1MA36;Q9QWN8	Spectrin beta chain, non-erythrocytic 2	Sptbn2	-0.49	-0.67	-0.44	-0.13	0	0	18		5836	Q5M821;A0A0H2UI17;Q5M821-2;M0R7Q8	Protein phosphatase 1H	Ppm1h;Ppm1m	0	0	0	0	0.18	0	11
4850	P33124	Long-chain-fatty-acid--CoA ligase 6	Acsl6	-0.54	0	0	0	0	0	26		61	A0A096MKH2;Q4KM55		Vta1	0	0	0	0	0.18	0	11
3215	D4AEC2;A0A0G2K7K9		Camsap2	0	-0.3	0	0	0	0	29		6268	Q63616	Vacuolar protein sorting-associated protein 33B	Vps33b	0	0	0	0	0.18	0	11
4573	P06687	Sodium/potassium-transporting ATPase subunit alpha-3	Atp1a3	-0.37	-0.42	-0.2	0	0	0	9		6636	Q6MGC4;A0A0U1RRW5		Pfdn6	0	0	0	0	0.18	0	11
3797	F1MA98	Nucleoprotein TPR	Tpr	0	0	0	0	0.16	0	10		1462	B2GUZ7		Tbcc	0	0	0	0	0.19	0	11
5985	Q5U2P1	Metal transporter CNNM2	Cnnm2	0	-0.3	0	0	0	0	29		3825	F2Z3Q8;P52296	Importin subunit beta-1	Kpnb1	0	0.1	0.07	0.1	0.18	0.1	11
3800	F1MAA5;Q66H32		Rangap1	-0.25	0	0	0.22	0	0.34	1		2278	D3ZLZ7;A0A0A0MXZ8	Inosine-5-monophosphate dehydrogenase 1;Inosine-5-monophosphate dehydrogenase	Impdh1	0	0	0	0	0.19	0	11
3804	F1MAF8;Q5EBA2		Atg2b	0	0	-0.18	0	0	0	28		2359	D3ZQ02		Wdr37	0	0	0	0	0.19	0	11
3680	F1M4R7;Q9ERQ6;Q9ERQ6-2	Chondroitin sulfate proteoglycan 5	Cspg5	0	-0.3	0	0	0	0	29		3664	F1M3W5		Dmxl2	0	0	0	0	0.19	0	11
4651	P11030;Q6TXF3;Q7TPL2	Acyl-CoA-binding protein;Triakontatetraneuropeptide;Octadecaneuropeptide	Dbi;LOC301444	0	-0.3	0	0	0	0	29		4095	Q3MIF1;G3V8E4		Ubfd1	0	0	0	0	0.19	0	11
3818	F1MAQ7;E9PTE1;Q6PDU3		Son	0	-0.22	0	0	0.37	0	34		4740	P19139	Casein kinase II subunit alpha	Csnk2a1	0	0	0	0	0.19	0	11
3202	D4AE31;A0A0G2K3C7		Fam126a	0	-0.3	0	0	0	0	29		4370	M0RD20;Q64537;A0A0G2K6H7	Calpain small subunit 1	Capns1	0	0	-0.08	0	0.22	0	11
317	A0A0G2JWJ0;D4A1S6;D3ZR53;Q10728-2;Q10728;D4ACS0;Q10728-3	Protein phosphatase 1 regulatory subunit;Protein phosphatase 1 regulatory subunit 12A	Ppp1r12a	0	-0.3	0	0	0	0	29		5147	P68403-2;P68403;F1LS42;F1LS36;A0A0G2K5Q0;Q6LDV0	Protein kinase C beta type;Protein kinase C	Prkcb	0	0	0	0	0.19	0	11
3823	F2W8B0;P22734-2;P22734	Catechol O-methyltransferase	Comt	-0.2	0	0	0	0	0.19	32		5207	P97536	Cullin-associated NEDD8-dissociated protein 1	Cand1	0	0	0	0	0.19	0	11
3824	F2W8B2;P21451	Endothelin B receptor	Ednrb	0	0.64	0.51	0	0.86	0.63	11		5275	Q05175	Brain acid soluble protein 1	Basp1	0	0	0	0	0.19	0	11
3825	F2Z3Q8;P52296	Importin subunit beta-1	Kpnb1	0	-0.14	-0.13	0.04	0.11	0.19	15		6396	Q66HR2;A0A0G2JT48;O35879	Microtubule-associated protein RP/EB family member 1	Mapre1	0	0	0	0	0.19	0	11
3829	F2Z3T4	Muscleblind-like protein 2	Mbnl2	0	0	0	0	0.49	0	34		6544	Q6AYP7;A0A096MK29	7-methylguanosine phosphate-specific 5-nucleotidase;5-nucleotidase	Nt5c3b	0	0	0	0	0.19	0	11
3830	F2Z3T7;Q6I7R3	Isochorismatase domain-containing protein 1	Isoc1	0	0	0	0.1	0.06	0	25		6645	Q6P4Z9	COP9 signalosome complex subunit 8	Cops8	0	0	0	0	0.19	0	11
4101	G3V8G5;Q62638	Golgi apparatus protein 1	Glg1	-0.39	-0.13	-0.1	0	0.26	0.32	16		4558	P05065;Q6AY07	Fructose-bisphosphate aldolase A;Fructose-bisphosphate aldolase	Aldoa;Aldoart2	0	-0.17	-0.06	0	0.19	0	11
3837	F7EMB2;Q6QI16		RGD1304704	0	0	0	0	0	0.22	32		854	A0A0G2K847;G3V9U1;B0BND8		Agap1;Centg2	0	0	0	0	0.19	0	11
3838	F7EN52;A0A0G2JWG7		Cyp46a1	-0.48	-0.36	-0.2	0	0.22	0.24	3		4643	P10687;F1M084;R9PXY3	1-phosphatidylinositol 4,5-bisphosphate phosphodiesterase beta-1;Phosphoinositide phospholipase C	Plcb1	0	0	0.09	0	0.16	0	11
7080	Q9QVC8	Peptidyl-prolyl cis-trans isomerase FKBP4;Peptidyl-prolyl cis-trans isomerase FKBP4, N-terminally processed	Fkbp4	0	0	0	0	0.18	0.3	17		927	A0A0G2K9L2;D4A6C9		Tom1l2	0	0	0	0	0.19	0	11
3430	F1LR33;Q6W5G4	Lipid phosphate phosphatase-related protein type 2	Lppr2	-0.54	-0.53	0	0	0	0	27		4466	O55096	Dipeptidyl peptidase 3	Dpp3	0	0	0	0	0.2	0	11
3977	G3V721;Q8R478	WW domain-binding protein 2	Wbp2	0	-0.3	0	0	0	0	29		5682	Q5BJP3	Ubiquitin-fold modifier 1	Ufm1	0	0	0	0	0.2	0	11
3843	Q4KM69;F7EUU4		Cops5	0	0	0	0	0	0.2	32		5783	Q5FWY5	AH receptor-interacting protein	Aip	0	0	0	0	0.2	0	11
3845	Q7TQ25;Q7TNM3;F7EYB9		Omg	0	0	0	0	0	0.16	32		4742	P19332-3;P19332-7	Microtubule-associated protein tau	Mapt	0	0	0	0.33	0.46	0	11
3849	F7F1Y3;Q793F9;Q6IRG3	Vacuolar protein sorting-associated protein 4A	Vps4a	0	-0.13	0	0.18	0	0	29		6223	Q63135;Q63135-2;A0A0G2K7Y0;O35520;Q9QYQ8	Complement component receptor 1-like protein	Cr1l	0	0	0	0	0.2	0	11
3850	F7F2F3;B4F772		Hspa4l	0	0	0	0	0.12	0	10		4798	P25113;F1M1Y1;P16290	Phosphoglycerate mutase 1;Phosphoglycerate mutase 2	Pgam1;Pgam2	0	0	-0.18	0	0.27	0	11
3852	F7F3I7;A0A1B0GWL6;A0A1B0GWV9			0	0	-0.51	0	0	0	14		6432	Q68FX1	Mannose-6-phosphate isomerase	Mpi	0	0	0	0	0.2	0	11
3853	F7F3Z1		Lman2l	0	0	-0.17	0	0	0	28		4832	P31016;A0A0G2K7F5;P97630	Disks large homolog 4	Dlg4	0	0	0	0.13	0.29	0	11
3860	Q6IRL2;F7FHF7;Q8R500	Mitofusin-2	LOC100911485;Mfn2	-0.22	0	-0.14	0	0	0	13		766	A0A0G2K677;Q5BJU8		Sptbn4	0	0	0	0	0.2	0	11
3869	F8V328;P35280;Q5M970;A0A0G2K553	Ras-related protein Rab-8A	Rab8a	-0.33	0	0	0	0	0	13		767	A0A0G2K694;Q5FVT1;Q62796;A0A096MJZ4	RalA-binding protein 1	Ralbp1	0	0	0	0	0.2	0	11
3872	F8WFH8;Q6P7B0;A0A0G2K673	Tryptophan--tRNA ligase, cytoplasmic;T1-TrpRS;T2-TrpRS	Wars	0	-0.16	0	0	0.19	0.25	15		4908	P46462	Transitional endoplasmic reticulum ATPase	Vcp	0	-0.09	-0.03	0.08	0.11	0	11
3873	F8WFM2;P85969	Beta-soluble NSF attachment protein	Napb	-0.33	-0.53	-0.18	0	0	0.18	9		4939	P50399	Rab GDP dissociation inhibitor beta	Gdi2	0	0	0.07	0.13	0.21	0	11
3874	F8WFS9;Q05764;Q05764-2	Beta-adducin	Add2	0	-0.2	0	0	0	-0.07	29		4969	Q6IRG9;P53676	AP-3 complex subunit mu-1	Ap3m1	0	0	0	0.14	0.14	0	11
5885	Q5PPL3	Sterol-4-alpha-carboxylate 3-dehydrogenase, decarboxylating	Nsdhl	0	-0.44	-0.41	0	0.2	0.35	24		894	A0A0G2K911;O35987	NSFL1 cofactor p47	Nsfl1c	0	0	0	0	0.2	0	11
3879	G3V614;Q4G074	KIF1-binding protein	LOC606294;Kbp	0	0	0	0	0	0.63	5		4139	G3V8V1;P23785;Q6IN42;F1LMP7	Granulins;Acrogranin;Granulin-1;Granulin-2;Granulin-3;Granulin-4;Granulin-5;Granulin-6;Granulin-7	Grn	0	0	0	0	0.21	0	11
4584	P07340;A0A096MJI9	Sodium/potassium-transporting ATPase subunit beta-1	Atp1b1	-0.37	-0.49	-0.2	0	0	0	9		5576	Q4V7D2	Protein rogdi homolog	Rogdi	0	0	0	0	0.21	0	11
3885	G3V640;O35094	Mitochondrial import inner membrane translocase subunit TIM44	Timm44	0	-0.17	-0.2	0	0	0	4		567	A0A0G2K1L8			0	0	0	0	0.21	0	11
389	G3V9W6;A0A0G2JY43;P30839	Aldehyde dehydrogenase;Fatty aldehyde dehydrogenase	Aldh3a2	0	0	-0.13	0	0	0	28		5060	P62329	Thymosin beta-4;Hematopoietic system regulatory peptide	Tmsb4x	0	0	0	0.18	0.35	0	11
3890	G3V661;Q2V6G6		Baz1b	0	0	0	0	0	0.48	1		6368	Q66H91		Git2	0	0	0	0	0.21	0	11
3897	G3V679		Tfrc	0	0	0	0	0	0.4	1		5078	P62815	V-type proton ATPase subunit B, brain isoform	Atp6v1b2	0	0	-0.1	0.07	0.15	0	11
2723	D4A0A1		Soga3	-0.53	-0.45	-0.11	0	0	0	27		5103	P63004	Platelet-activating factor acetylhydrolase IB subunit alpha	Pafah1b1	0	-0.12	0	0	0.25	0	11
3906	G3V6C9;O54874;A0A0G2K5Z1	Non-specific serine/threonine protein kinase;Serine/threonine-protein kinase MRCK alpha	Cdc42bpa	0	-0.44	-0.12	0	0.21	0	36		6391	Q66HM2		Ap2a2	0	0	0	0	0.21	0	11
4591	P07825;A0A0G2KAD8	Synaptophysin	Syp	-0.32	-0.38	-0.25	0	0	0	9		6968	Q99ND9	RWD domain-containing protein 1	Rwdd1	0	0	0	0	0.21	0	11
6619	Q6MG08	ATP-binding cassette sub-family F member 1	Abcf1	0	-0.29	0	0	0	0	29		5189	P84092;A0A140TAH5	AP-2 complex subunit mu	Ap2m1	0	0	-0.15	0	0.16	0	11
4970	P53678;V9GZ82	AP-3 complex subunit mu-2	Ap3m2	0	-0.29	0	0	0	0	29		1443	B2DD29	Serine/threonine-protein kinase BRSK1	Brsk1	0	0	0	0	0.22	0	11
3913	G3V6G7;Q562B9;B1H2A4		Pnpt1	0	0	-0.23	0	0	0	28		148	A0A0G2JT00;G3V616;Q6MGD0	Protein CutA	Cuta	0	0	0	0	0.22	0	11
5405	Q3KRF2;Q9Z1A6;Q6P513	Vigilin	Hdlbp	-0.27	-0.22	0	0	0.22	0.5	16		5244	Q00981	Ubiquitin carboxyl-terminal hydrolase isozyme L1	Uchl1	0	-0.05	0	0	0.19	0	11
3915	G3V6H5		Slc25a11	0	-0.29	-0.17	0	0	0	4		3228	D4AEK9		Ccdc6	0	0	0	0	0.22	0	11
3918	G3V6I1;Q8K4K5	Lethal(2) giant larvae protein homolog 1	Llgl1	0	0	0.19	0	0	0.14	32		5279	Q05982	Nucleoside diphosphate kinase A	Nme1	0	0	0	0.14	0.28	0	11
3922	G3V6I9;D4A1Z2;D4AE42;P12749;D3ZSF2	60S ribosomal protein L26	Rpl26;Rpl26-ps2;Rpl26-ps1;LOC688981	0	0	0	0	0	0.28	32		533	A0A0G2K0W9;P48004-2;P48004;A0JPK2;F1M6I7	Proteasome subunit alpha type-7;Proteasome subunit alpha type	Psma7;Psma8	0	0	0	0.1	0.11	0	11
601	M0R961;A0A0G2K2B3;Q99PF5	Far upstream element-binding protein 2	Khsrp	-0.21	-0.14	0	0.14	0.18	0	19		4878	P36876	Serine/threonine-protein phosphatase 2A 55 kDa regulatory subunit B alpha isoform	Ppp2r2a	0	0	0	0	0.22	0	11
3936	G3V6P2;Q01205;Q8CJG5;D0VYQ0	Dihydrolipoyllysine-residue succinyltransferase component of 2-oxoglutarate dehydrogenase complex, mitochondrial	Dlst;DLST	0	0	-0.12	0	0	0	28		5457	Q498D8		Rbx1	0	0	0	0	0.22	0	11
3939	G3V6P7;Q62812	Myosin-9	LOC100911597;Myh9	-0.21	-0.2	0	0	0.13	0.25	37		5660	Q568Z6	IST1 homolog	Ist1	0	0	0	0	0.22	0	11
3942	G3V6Q6;Q9JID2	Guanine nucleotide-binding protein subunit alpha-11	Gna11	0	-0.2	0	0	0	0.18	15		5429	Q3T1K5	F-actin-capping protein subunit alpha-2	Capza2	0	-0.08	0	0	0.13	0	11
3943	G3V6Q9;Q925T8	BMP/retinoic acid-inducible neural-specific protein 1	Brinp1	0	-0.3	-0.39	0	0	0	4		5441	Q45QK6;M0RBJ0;O35355	Guanine nucleotide-binding protein subunit gamma	Gng2	0	0	0	0.13	0.28	0	11
1279	B0BN65		Fam49a	0	0	0	0.37	0.48	0.55	11		6089	Q5XIA5		Coasy	0	0	0	0	0.22	0	11
3953	G3V6U3;Q3B8P6		Alg2	-0.28	-0.2	-0.1	0.07	0.16	0.18	37		5507	Q4KLF8;A0A0G2K585;A0A0U1RRQ2	Actin-related protein 2/3 complex subunit 5	Arpc5	0	0	-0.08	0	0.15	0	11
3954	G3V6U4;A0A1B0GWU2;A0A1B0GWQ5;Q8CH84;A0A1B0GWY9	ELAV-like protein;ELAV-like protein 2	Elavl2	0	-0.23	0	0	0.24	0	10		6192	Q62829	Serine/threonine-protein kinase PAK 3	Pak3	0	0	0	0	0.22	0	11
3814	F1MAM6;M0R8N2		Dnah8	0	-0.29	0	0	0	0	29		1209	A2RUW1;C9K104	Toll-interacting protein	Tollip;tollip	0	0	0	0	0.23	0	11
3098	D4AB01		Hint2	0	-0.29	0	0	0	0	29		4422	O35264	Platelet-activating factor acetylhydrolase IB subunit beta	Pafah1b2	0	0	0	0	0.23	0	11
5329	Q1HL14		Cers1	-0.53	0	0	0	0	0	26		6299	Q641W2	UPF0160 protein MYG1, mitochondrial	Myg1	0	0	0	0	0.23	0	11
3605	F1LZX5		Hectd4	-0.29	-0.26	0	0	0.39	0.37	16		7086	Q9QXY2-2;Q9QXY2	SRC kinase signaling inhibitor 1	Srcin1	0	0	0	0	0.23	0	11
3972	G3V714;P27682	Neuroendocrine protein 7B2;N-terminal peptide;C-terminal peptide	Scg5	-0.25	0	0	0	0	0	13		5754	Q5FVI6	V-type proton ATPase subunit C 1	Atp6v1c1	0	-0.05	-0.06	0.1	0.17	0	11
4340	M0RAQ6	Hexokinase	Hk1	0	-0.29	0	0	0	0	29		1212	A2VCX1	TIP41-like protein	Tiprl	0	0	0	0	0.24	0	11
3979	Q5EBA4;G3V728		Nipsnap1	0	-0.28	-0.31	0	0	0	4		2631	D3ZXM4;A0A0G2K1A4		Evi5l	0	0	0	0	0.24	0	11
3982	G3V741;Q6IRH6;P16036	Phosphate carrier protein, mitochondrial	Slc25a3	0	-0.18	-0.2	0	0	0	4		3575	F1LXQ7		Arhgap21	0	0	0	0	0.24	0	11
4659	P11505-4;P11505;P11505-6;P11505-3;P11505-5;P11505-2	Plasma membrane calcium-transporting ATPase 1	Atp2b1	-0.4	-0.38	-0.34	0	0	0	9		3842	F7ESM5;Q7TQ94;Q5PQK6	Nitrilase homolog 1	Nit1	0	0	0	0	0.24	0	11
3988	G3V762;B0BNN0		Tsta3	0	0	0	0	0	0.15	32		4498	O88377	Phosphatidylinositol 5-phosphate 4-kinase type-2 beta	Pip4k2b	0	0	0	0	0.24	0	11
5208	Q5RKJ7;P97538	Ras-related protein M-Ras	Mras	0	-0.29	0	0	0	0	29		4506	O88637-2;O88637	Ethanolamine-phosphate cytidylyltransferase	Pcyt2	0	0	0	0	0.24	0	11
3991	G3V784;Q5D001		Adpgk	0.37	0	0	0	0	0	25		605	D3ZQL7;A0A0G2K2D6		Tppp	0	0	0	0.11	0.42	0	11
3992	G3V790;Q8K1P7;B5DFE9;Q63071	Transcription activator BRG1	Smarca4	-0.17	0	0	0	0	0	13		5715	Q6F6B2;Q5BK33		LOC652956	0	0	0	0	0.24	0	11
2834	D4A3M8		Nck2	0	-0.29	0	0	0	0	29		6983	Q9EPF2;Q9EPF2-2	Cell surface glycoprotein MUC18	Mcam	0	0	0	0	0.24	0	11
3998	G3V7D4;A5HTT2		Efnb3	0	-0.5	-0.73	0	0	0	2		2247	D3ZKU7	Biogenesis of lysosome-related organelles complex 1 subunit 1	Bloc1s1	0	0	0	0	0.25	0	11
4000	G3V7F1;Q9Z2K5	Target of rapamycin complex subunit LST8	Mlst8	0	-0.32	0	0	0	0.28	15		2491	D3ZU52		Cops7b	0	0	0	0	0.25	0	11
4002	G3V7F6;Q3MHS8		RGD1561590;Sap18	-0.25	0	0	0	0	0.4	1		2823	D4A3D9		Stk32c	0	0	0	0	0.25	0	11
665	A0A0G2K3N1;F1M8X9		Gbf1	0	0	0	0	0.5	0.8	11		4652	P11232;R4GNK3	Thioredoxin	Txn;Txn1	0	0	0	0	0.25	0	11
3951	G3V6T1;B5DFK1	Coatomer subunit alpha	Copa	0	0	0	0.19	0.34	0.53	11		6184	Q62768-2;Q62768-3;Q62768	Protein unc-13 homolog A	Unc13a	0	-0.33	0	0	0.43	0	11
4009	G3V7I0;Q9Z0V6	Thioredoxin-dependent peroxide reductase, mitochondrial	Prdx3	0	0	-0.18	0	0	0	28		4716	P16446;R9PXS4	Phosphatidylinositol transfer protein alpha isoform	Pitpna	0	0	0	0	0.25	0	11
4010	G3V7I3;B5DEX7		Atp13a1	0	0	0	0	0.16	0.23	32		5386	Q3B8Q0;M0R7M8;M0R8A4	Microtubule-associated protein RP/EB family member 2	Mapre2;LOC100911918	0	0	0	0	0.25	0	11
4011	G3V7I5;Q66HF8	Aldehyde dehydrogenase X, mitochondrial	Aldh1b1	0	-0.18	-0.25	0	0	0	4		5941	Q5RK19	Vacuolar-sorting protein SNF8	Snf8	0	0	0	0	0.25	0	11
2750	D4A193	Receptor expression-enhancing protein	Reep1	0	-0.29	0	0	0	0	29		1007	A0A0G2QC23;G3V6H1		Galc	0	0	0	0	0.26	0	11
5529	Q4KM38		Srsf10	0	-0.29	0	0	0	0	29		166	A0A0G2JTD8;D4A6T9		Mark4	0	0	0	0	0.26	0	11
2205	D3ZJF9		Gla	0	0	0	0	0.23	0.28	17		2097	D3ZFY8;F1M227		LOC100912618	0	0	0	0	0.26	0	11
4028	G3V7N0;Q5BJX3		Hs2st1	-0.3	0	0	0	0	0.56	5		2281	D3ZM21		Comtd1	0	0	0	0	0.26	0	11
504	G3V6Q3;B2RZ63;A0A0G2K0H6		Wdr13	0	-0.29	0	0	0	0	29		6335	Q64548-2	Reticulon-1	Rtn1	0	0	0	0	0.26	0	11
6260	Q6IMY8;Q63555;A0A0G2JZ52		Hnrnpu	-0.33	-0.16	-0.11	0	0.33	0.49	16		119	D3ZLW4;A0A0G2JSL4;P49816-4;P49816-2;P49816-3;P49816	Tuberin	Tsc2	0	0	0	0	0.27	0	11
4668	P11951;P11950;Q78EE8;Q9Z1G9	Cytochrome c oxidase subunit 6C-2;Cytochrome c oxidase subunit 6C-1	Cox6c2;Cox6c1;COVIc;Cox6c	-0.32	-0.3	-0.25	0	0	0	9		2990	D4A7M0		Plxnc1	0	0	0	0	0.27	0	11
4044	G3V7U4;P70615	Lamin-B1	Lmnb1	-0.22	0	0	0	0	0	13		6410	Q68FQ9		Lancl2	0	0	0	0.1	0.17	0	11
6453	Q6AXR4;F1LR87	Beta-hexosaminidase subunit beta	Hexb	0	0	0	0	0.21	0.34	17		6416	Q68FS2	COP9 signalosome complex subunit 4	Cops4	0	-0.14	0	0	0.15	0	11
473	A0A0G2JZV3;G3V8G1;B0BN26		Agtpbp1	0	-0.28	0	0	0	0	29		4767	P20651;A0A0G2K7T5	Serine/threonine-protein phosphatase 2B catalytic subunit beta isoform	Ppp3cb	0	0	0	0	0.27	0	11
4050	G3V7W1;G3V7W1-2		Pdcd6	0	0	0	0.16	0	0	25		618	A0A0G2K2R0;D3ZU85		Frmd4a	0	0	0	0	0.27	0	11
4053	G3V7Y3;P35434	ATP synthase subunit delta, mitochondrial	Atp5d	-0.42	0	0	0	0	0	13		5332	Q1M168	Caytaxin	Atcay	0	0	0	0	0.28	0	11
4056	G3V7Z4;P07092;O88772	Glia-derived nexin	Serpine2	0	0	0	0	0	0.29	32		6328	Q642G4	Peroxisomal membrane protein PEX14	Pex14	0	0	0	0	0.28	0	11
4057	G3V7Z8		Pabpn1	0	0	-0.13	0	0	0	28		6721	Q6RJR6	Reticulon-3	Rtn3	0	0	0	0	0.28	0	11
4058	G3V803;Q9Z1Y3;Q9JIV7	Cadherin-2	Cdh2	-0.36	-0.11	0	0	0	0	13		6549	Q6AYR2;D4ACZ5	Protein NDRG3	Ndrg3	0	-0.17	0	0	0.37	0	11
406	A0A0G2JYD8;G3V7U6;Q8R4C0	Calpain-5	Capn5	-0.24	0	0	0	0	0	13		5045	P62024;F1LNB2	Phosphatase and actin regulator 1;Phosphatase and actin regulator	Phactr1	0	0	0	0	0.3	0	11
4062	G3V824;Q63002		Igf2r	0	0	-0.18	0	0.33	0.37	17		3655	F1M3D2;M0RDT6		Dmwd	0	0	0	0	0.31	0	11
4063	G3V826	Transketolase	Tkt	0	0	0	0	0	0.12	32		2305	D3ZMY7		Nt5c2	0	0	0	0	0.32	0	11
4067	Q6P7S6;G3V836;P05371;Q9ERD1;O35510;A0A0G2KB42	Clusterin;Clusterin beta chain;Clusterin alpha chain	Clu	0	0.24	0.47	0	0	0	30		25	A0A096MJL2;A0A096MJC9		LOC100911918	0	0	0	0	0.32	0	11
4070	G3V845;P10686	Phosphoinositide phospholipase C;1-phosphatidylinositol 4,5-bisphosphate phosphodiesterase gamma-1	Plcg1	0	-0.44	-0.28	0	0	0	33		6923	Q91Z79;F1LSE6	Liprin-alpha-3	Ppfia3	0	0	0.08	0	0.23	0	11
4073	G3V852;Q498D4;Q3B7U7		Tln1	0	0	0.12	0	0	0	25		4593	P07936	Neuromodulin	Gap43	0	0	0	0	0.32	0	11
4685	P13264;A0A0G2K1T0	Glutaminase kidney isoform, mitochondrial;Glutaminase kidney isoform 68 kDa chain;Glutaminase kidney isoform 65 kDa chain	Gls	-0.39	0	-0.29	0	0	0	8		2147	D3ZHL1		Ksr1	0	0	0	0	0.33	0	11
3391	F1LPV2;P98166	Very low-density lipoprotein receptor	Vldlr	-0.52	-0.34	0	0	0	0	27		5918	Q5QD51-3;Q5QD51-2;Q5QD51;Q62766	A-kinase anchor protein 12	Akap12	0	0	0	0	0.34	0	11
4080	G3V886;Q925S8;Q66HP7	ATP-dependent zinc metalloprotease YME1L1	Yme1l1	0	0	0	0	0	0.21	32		7003	Q9ERH3;Q9ERH3-2	WD repeat-containing protein 7	Wdr7	0	0	0	0.11	0.17	0	11
4084	G3V8A5;B5DFC1		Vps35	-0.3	-0.34	-0.07	0	0	0.2	37		7034	Q9JIH7-3;A0A0G2K3A0;Q9JIH7;Q9JIH7-2;Q9JIH7-5;Q9JIH7-4	Serine/threonine-protein kinase WNK1	Wnk1	0	0	0	0	0.34	0	11
117	A0A0G2JSL0;P28073	Proteasome subunit beta type-6	Psmb6	0	0	0	0	0	0.09	25		2371	D3ZQE7;A0A0G2JT21		Jakmip2	0	0	0	0	0.36	0	11
4088	G3V8C3;P31000;Q6P725;P48675	Vimentin;Desmin	Vim;Des	-0.21	0.05	0.33	0	0.12	0	30		7107	Q9R063-2;A0A0G2JSS8;Q9R063	Peroxiredoxin-5, mitochondrial	Prdx5	0	-0.14	0	0	0.17	0	11
4090	G3V8C8;Q9QXJ0	Tubulin--tyrosine ligase	Ttl	0	0	0	0.19	0	0	25		6955	Q99JE4;A0A0G2JW65	Ras-specific guanine nucleotide-releasing factor 2	Rasgrf2	0	0	0	0	0.36	0	11
502	D3ZMI4;A0A0G2K0F3;Q9WTP0-2;D4A9L5;Q9WTP0;A0A0G2K0B2;D4ACZ4	Band 4.1-like protein 1	Epb41l1	-0.3	-0.36	-0.2	0	0	0	9		7175	Q9Z272;A0A0G2K527	ARF GTPase-activating protein GIT1	Git1	0	-0.2	0	0	0.21	0	11
6912	Q8VI04	Isoaspartyl peptidase/L-asparaginase;Isoaspartyl peptidase/L-asparaginase alpha chain;Isoaspartyl peptidase/L-asparaginase beta chain	Asrgl1	0	-0.28	0	0	0	0	29		2530	D3ZV15;A0A0U1ZFN5;A0A0U1ZEI3		Cbl	0	0	0	0	0.38	0	11
4096	G3V8F5;Q75Q40	Mitochondrial import receptor subunit TOM40 homolog	Tomm40	0	0	0	0.17	0	0	25		5228	P97837	Disks large-associated protein 2	Dlgap2	0	0	0	0	0.39	0	11
41	A0A096MJZ0;B1WBZ0		Dnal1;Dnalc1	0	0	0	0	0	0.62	5		781	A0A0G2K6J5;B2GV99;Q64119;A0A0G2JWE1	Myosin light polypeptide 6	Myl6	0	0	0	0	0.21	0.11	11
410	A0A0G2JYH7;B0BN10		Sh2d3c	-0.36	0	0	0	0	0	13		2874	D4A4M0		Shisa6	0	0	0	0	0.4	0	11
4100	G3V8G4;P55068;P55068-2;A0A0G2JYH8	Brevican core protein	Bcan	0	0.15	0	0	0	0	25		2867	D4A4F9		LOC682489	0	0	0	0	0.41	0	11
4851	P34058;A0A0G2K793	Heat shock protein HSP 90-beta	Hsp90ab1	-0.25	-0.2	0	0.08	0.29	0.47	16		902	A0A0G2K9A2;P85970;A0A0G2K905;A0A0G2K2J1;A0A0G2K1V8	Actin-related protein 2/3 complex subunit 2	Arpc2	0	-0.16	-0.09	0	0.17	0	11
4105	G3V8J5;Q9ESQ7	PH and SEC7 domain-containing protein 1	Psd	0	-0.64	-0.56	0	0	0	2		923	A0A0G2K9J2;Q5XIL1;E9PTI1		Atp6v1h	0	0	-0.06	0.1	0.17	0	11
5226	P97829-2;A0A0G2JTH4;P97829	Leukocyte surface antigen CD47	Cd47	0	-0.28	0	0	0	0	29		6472	Q6AY17	Alpha/beta hydrolase domain-containing protein 17B	Abhd17b	0	0	0	0	0.49	0	11
4108	G3V8L3;P48679;A0A0G2JTC5;P70482;Q6P6U3;A0A0G2K3R2;A0A1B0GWU9	Prelamin-A/C;Lamin-A/C	Lmna;C2.1	-0.17	0	0	0	0	0	13		930	A0A0G2K9M4			0	0	0.12	0	0.25	0	11
6842	Q80Z30	Protein phosphatase 1E	Ppm1e	0	-0.44	-0.38	0	0.18	0.22	24		1079	A0A0H2UI10;Q8VIJ5;Q8VIJ5-3;Q8VIJ5-2	Protein O-GlcNAcase	Mgea5	0	0	0.31	0	0.11	0	12
2977	D4A7D3		Tbk1	-0.52	0	0	0	0	0	26		1095	A0A0U1RRV5;D3ZKG9	Clustered mitochondria protein homolog	Cluh	0	0	0.35	0	0	0	12
4119	G3V8Q1;B1WBX7;A0A0U1RRT4		Cope	-0.21	0	0	0	0	0	13		1142	A0A1B0GWW0			0	0	0.46	0	0	0	12
412	D3ZEA3;A0A0G2JYJ1;P0CE43	Growth factor receptor-bound protein 10	Grb10	0	0	-0.33	0	0.25	0	14		1287	B0BN85;Q7TQ12;F1LMY6	Suppressor of G2 allele of SKP1 homolog	Sugt1	0	0	0.18	0	0.11	0	12
4125	G3V8R2;P55067;A0A0G2K4R4;O70474	Neurocan core protein;150 kDa adult core glycoprotein	Ncan	0	0.22	0.11	0.2	0.1	0	12		1289	B0BN94	Protein FAM136A	Fam136a	0	0	0.41	0	0	0	12
4130	G3V8T3;P55266	Double-stranded RNA-specific adenosine deaminase	Adar	0	-0.25	-0.14	0.35	0	0	4		1407	B1WBX6;A0A0G2K9N0		Smap2	0	0	0.18	0	0	0	12
2009	D3ZD97		Dhx15	0	0	0	0.21	0.41	0.52	11		1445	B2GUU4;Q3MIB4;Q6TXI3;F7FF30	Lon protease homolog 2, peroxisomal	Lonp2	0	0	0.27	0	0	0	12
4132	Q4QQS4;G3V8T5		Ruvbl2	0	0	0	0	0.12	0.27	32		1452	B2GUX5	5-nucleotidase	Nt5c3a	0	0	0.28	0	0	0	12
4133	G3V8T7;Q6PCT7		Tdrkh	-0.32	-0.17	0	0	0	0	6		150	A0A0G2JT23;D3ZA69		Nrbp2	0	0	0.19	0	0	0	12
5878	Q5PPI4	Lysosome-associated membrane glycoprotein 5	Lamp5	0	-0.28	0	0	0	0	29		1533	B2RYK3;P18297;D3ZT59	Sepiapterin reductase	Spr	0	0	0.18	0	0	0	12
4149	G3V912;Q52KK2		Tmx4	0	0	0	0	0	0.35	1		1547	B2RYP3		Fam91a1	0	0	0.27	0	0	0	12
4153	G3V918		Gart	0	0	0	0	0	0.27	32		1572	B2RYU7		Cbx5	0	0.15	0.2	0	0	0	12
1656	B4F7A2;F1M943		Armc8	-0.51	-0.35	0	0	0	0	27		1652	B4F779		Appl2	0	0	0.17	0	0	0	12
6915	Q91V33	KH domain-containing, RNA-binding, signal transduction-associated protein 1	Khdrbs1	-0.32	-0.12	0	0	0.25	0.41	16		1736	D3ZCH6;B5DF79;A0A0G2K9L0		Rnaset2	0	0	0.46	0	0	0	12
1689	B5DEL8;A0A0G2JZJ9		LOC100361505	0	-0.28	0	0	0	0	29		1742	B5DF95;A0A0G2K782		Zc2hc1a	0	0	0.4	0	0	0	12
5145	P68255	14-3-3 protein theta	Ywhaq	-0.35	-0.47	-0.21	0	0	0	9		1752	B5DFD8	SH3 domain-binding glutamic acid-rich-like protein	Sh3bgrl	0	0	0.31	0	0	0	12
3465	F1LRY8;Q63366;F1LWT9	Neurexophilin-1;Neurexophilin	Nxph1;Nxph2	-0.52	0	0	0	0	0	26		1876	D3Z955		Pgm2l1	0	0	0.37	-0.19	-0.32	0	12
5301	Q09073	ADP/ATP translocase 2;ADP/ATP translocase 2, N-terminally processed	Slc25a5	-0.39	-0.31	-0.25	0	0	0	9		2088	D3ZFQ1		Atxn7l3b	0	0	0.31	0	0	0	12
4169	G3V984;A0A0G2K1X6		Bsn	0	-0.43	-0.3	0	0	0	33		2167	D3ZI49;A0A0G2K8P5;Q9JHU6	Stathmin;Stathmin-3	Stmn3	0.16	0	0.3	0	0	0	12
4171	G3V997;Q9ESI7	Neuronal migration protein doublecortin	Dcx	0	0	-0.22	0	0	0	28		2183	D3ZIT4		Anapc7	0	0	0.26	0	0	0	12
3670	F1M4A4;Q2P9S1	Kinesin-like protein	Kif1a	-0.21	-0.22	0	0.22	0.32	0.31	16		2200	D3ZJA9		Slc27a3	0	0	0.17	0	0	0	12
5429	Q3T1K5	F-actin-capping protein subunit alpha-2	Capza2	-0.25	-0.42	-0.23	0	0	0	9		2231	D3ZKE1		Uvrag	0	0	0.32	0	0	0	12
4191	G3V9N1;Q562B5	Serine/threonine-protein phosphatase PGAM5, mitochondrial	Pgam5	0	0	-0.2	0	0	0	28		2296	D3ZMP6		Nop10	0	0	0.2	0	0	0	12
3470	F1LS86;A0A0G2JVL8;Q5BJR3;A0A0G2JZH2		Iars	0	-0.1	0	0	0.18	0.46	22		2300	D3ZMS0		LOC100911713	0	0	0.18	0	0	0	12
4831	P30835;Q6P783	ATP-dependent 6-phosphofructokinase, liver type;ATP-dependent 6-phosphofructokinase	Pfkl	0	-0.42	-0.15	0	0.12	0.19	24		2330	D3ZP15		Rab9b	0	0	0.19	0	0	0	12
42	A0A096MJZ2;M0RCS2		Tbl2	0	0	0	0	0.25	0	10		243	D3ZKK5;A0A0G2JUZ0		Mtmr1	0	0	0.26	0	0	0	12
4200	G3V9T7;Q4G022	ATPase Asna1;Arsenical pump-driving ATPase	Asna1	-0.2	0	0	0	0	0.2	32		2503	D3ZUI1		Apip	0	0	0.41	0	0	0	12
4209	G3V9Y1;Q9JLT0;Q62707;Q62706;Q9R0H1;Q62705;P70620	Myosin-10	Myh10	0	-0.27	0	0	0.13	0.21	15		2612	D3ZX63		Wdr54	0	0	0.4	0	0	0	12
4212	H1UBN0;D3ZWR4		Cpne7	0	-0.57	-0.29	0	0	0.14	33		2632	D3ZXQ2;A0A0G2K5C0		Camsap3	0	0	0.23	0	0	0	12
4213	H2BF30;Q920R3	Fatty acid desaturase 1	Fads1	0	0	-0.53	0	0	0	14		2633	D3ZXS8		Ube2k	0	0	0.51	0	0	0	12
5348	Q2PQA9	Kinesin-1 heavy chain	Kif5b	-0.21	-0.13	0	0	0.27	0.28	16		2648	D3ZYH3		LOC100912928	0	0	0.42	0	0	0	12
4221	I6LBX8;A0A0G2K9D7		Pcdhgc3	-0.12	0	0.11	0	0	0	25		2689	D3ZZK3	Receptor protein-tyrosine kinase	Epha4	0	0.17	0.28	0	0	0	12
4222	I7EFB0;I7FKL4;P02688-5;P02688-2;P02688;P02688-4;P02688-3	Myelin basic protein	Mbp	0	0	0.81	0	0	0	30		2712	D4A022		Gapvd1	0	0	0.27	0	0	0	12
5052	P62193	26S protease regulatory subunit 4	Psmc1	0	-0.16	0	0.14	0.2	0.38	22		2763	D4A1G8		Cep170b	0	0	0.22	0	0	0	12
4232	M0R402		Tmx3	0	0	0	0	0.23	0.15	10		2766	D4A1J3		Palm3	0	0	0.31	0	0	0	12
4240	M0R4P9;A0A0G2JUK4		Ube2h	-0.35	0	0	0	0	0	13		2932	D4A631	Brefeldin A-inhibited guanine nucleotide-exchange protein 1	Arfgef1	0	0	0.28	0	0	0	12
6966	Q99NA5;F1LNF7	Isocitrate dehydrogenase [NAD] subunit alpha, mitochondrial;Isocitrate dehydrogenase [NAD] subunit, mitochondrial	Idh3a	-0.37	0	-0.2	0	0	0	8		2956	D4A6U4		Tecpr2	0	0	0.33	0	0	0	12
4243	M0R531;O88407	Protein lifeguard 2	Faim2	0	0	0	0	0	0.45	1		3085	D4AAH6		Psmg1	0	0	0.27	0	0	0	12
4244	M0R544		Gaa	0	0	0	0	0	0.27	32		3185	D4ADF5		Pdcd5	0	0	0.18	0	0	0	12
554	A0A0G2K1C0;Q4V7C7;Q9ERF9	Actin-related protein 3	Actr3	-0.22	-0.41	-0.18	0	0	0	9		3344	F1LNK0;A0A0U1RS09;P15146;Q78DZ1;P15146-4;A0A0U1RRQ0	Microtubule-associated protein;Microtubule-associated protein 2	Map2	0	0	0.26	0	0	0	12
4254	M0R5P8;F1M542		Adam22	-0.42	-0.25	0	0	0	0	6		3410	F1LQI2;A0A0G2JW21;O55005	Roundabout homolog 1	Robo1	0	0	0.5	0	0	0	12
3509	F1LTX8;Q6TXI6		Lpgat1;LOC317456	0	-0.28	0	0	0	0	29		3430	F1LR33;Q6W5G4	Lipid phosphate phosphatase-related protein type 2	Lppr2	0	0	0.45	0	0	0	12
1108	A0A140TAB3;P37285-2;P37285-3;P37285;A0A1B0GWT8	Kinesin light chain 1	Klc1	-0.51	0	-0.11	0.14	0.35	0	19		3432	F1LR42;Q4FZR3		Rufy1	0	0	0.25	0	0	0	12
3556	F1LWG4		Ndufaf1	0	-0.28	0	0	0	0	29		3500	F1LT49		Lrrc47	0	0	0.16	0	0	0	12
1070	A0A0H2UHX1;A1L1I6;Q6RJR6-2	Reticulon;Reticulon-3	Rtn3	0	-0.28	0	0	0	0	29		3618	F1M0J7		Prickle2	0	0	0.24	0	0	0	12
6101	Q5XIE1	Protein THEM6	Them6	0	-0.28	0	0	0	0	29		3619	F1M0N1	Non-specific protein-tyrosine kinase	Abl2	0	0	0.35	0	0	0	12
4294	M0R7U1		Ak5	0	-0.25	-0.15	0	0.39	0.5	22		3697	F1M6C4;M0RB29		Arl15	0	0	0.34	0	0	0	12
3352	F1LNX7;Q5PPK9	Protein TSSC1	Tssc1	0	-0.28	0	0	0	0	29		3724	F1M7S2;Q5XIU5	Proteasome inhibitor PI31 subunit	Psmf1	0	0	0.31	0	0	0	12
4307	M0R8T1;A0A0G2JZE4;F1M7H7;Q4L1J4-2;Q4L1J4	Membrane-associated guanylate kinase, WW and PDZ domain-containing protein 1	Magi1	-0.33	-0.29	0	0	0	0	6		3734	F1M801		Anapc1	0	0	0.19	0	0	0	12
431	F1LY70;A0A0G2JZ53		Birc6	0	-0.25	0	0	0	0.36	15		3819	F1MAR6;A0A0G2K2S1;B4F7D0		Prodh	0	0	0.21	0	0	0	12
5113	Q9WUW2;P63045	Vesicle-associated membrane protein 2	Vamp2	0	-0.28	0	0	0	0	29		3849	F7F1Y3;Q793F9;Q6IRG3	Vacuolar protein sorting-associated protein 4A	Vps4a	0	0	0.34	0	0	0	12
4321	M0R9L0;B2RYX0		Naca	0	0	0	0	0	0.19	32		388	A0A0G2JY26;D4A0I5		Dnajc6	0	0	0.17	0	0	0	12
7108	Q9R066;Q9R066-2	Coxsackievirus and adenovirus receptor homolog	Cxadr	0	-0.27	0	0	0	0	29		399	A0A0G2JYA2;Q9JHU5	Arfaptin-1	Arfip1	0	0	0.26	0	0	0	12
523	F1M8F2;A0A0G2K0Q2;Q6QLM7	Kinesin-like protein;Kinesin heavy chain isoform 5A	Kif5a	-0.35	0	0	0	0	0	13		4062	G3V824;Q63002		Igf2r	0	0.16	0.3	0	0	0	12
4329	M0RA15;Q4V8J7	Spindlin-1	Spin1	0	0	0	0	0	0.46	1		4063	G3V826	Transketolase	Tkt	0	0	0.24	0.15	0	0	12
2373	D3ZQG6;D3ZM62;A0A0G2K2M8	Tripartite motif-containing protein 2	Trim2	0	-0.39	-0.16	0	0.1	0.12	24		41	A0A096MJZ0;B1WBZ0		Dnal1;Dnalc1	0	0	0.32	0	0	0	12
4331	M0RA83;Q8CF82;Q8CF82-2	ATP-binding cassette sub-family A member 5	Abca5	0	0	0	0	0.46	0	34		4134	G3V8T9;Q9JKL3;Q63690	Apoptosis regulator BAX	Bax	0	0	0.24	0	0	0	12
4333	M0RAD5	ATP-dependent Clp protease proteolytic subunit	Clpp	0	0	-0.2	0	0	0	28		4153	G3V918		Gart	0	0	0.21	0	0	0	12
4338	M0RAM5;P04041;Q6PDW8	Glutathione peroxidase 1;Glutathione peroxidase	Gpx1	0	0	0.25	0	0	0	30		435	U6A022;A0A0G2JZ83;A0A0G2K2D4;G3V9Z5;B0BN79		AGAP3;Agap3	0	0	0.36	0	0	0	12
4339	M0RAP5		Sbf1	-0.19	-0.21	-0.15	0	0	0.11	20		4363	M0RCH6;D4A9Z8		Chmp4b;Chmp4bl1	0	0	0.29	0	0	0	12
5768	Q5FVM7	DnaJ homolog subfamily C member 16	Dnajc16	0	-0.27	0	0	0	0	29		4389	O08651	D-3-phosphoglycerate dehydrogenase	Phgdh	0	0	0.33	0	0	0	12
4346	M0RB22		Ptprd	0	-0.37	0	0	0.22	0.24	15		4489	O70595;A0A0G2K4U1;Q9Z1S2	ATP-binding cassette sub-family B member 6, mitochondrial	Abcb6	0	0	0.25	0	0	0	12
435	U6A022;A0A0G2JZ83;A0A0G2K2D4;G3V9Z5;B0BN79		AGAP3;Agap3	0	-0.34	-0.27	0	0	0	4		4528	O89049;A0A0G2JUN7;R9PXU4	Thioredoxin reductase 1, cytoplasmic	Txnrd1	0	0	0.25	0	0	0	12
4350	M0RBE5;O08957	Neuritin	Nrn1	0	0	-0.25	0	0	0	28		4606	Q45QM8;P08753	Guanine nucleotide-binding protein G(k) subunit alpha	Gnai3	0	0	0.22	0	-0.12	0	12
4355	M0RBS9;G3V8U4;Q8K4V4;Q8K4V4-2;Q5I0L6	Sorting nexin-27;Cytohesin-interacting protein	Snx27;Cytip	0	0	0	0	0	0.26	32		4664	P11730;P11730-3;P11730-2	Calcium/calmodulin-dependent protein kinase type II subunit gamma	Camk2g	0	0	0.46	0.21	0	0	12
4357	M0RC17;O88524		Chl1	-0.23	0	0	0	0	0	13		4675	P12711	Alcohol dehydrogenase class-3	Adh5	0	0	0.29	0	0	0	12
4361	M0RC99	Ras-related protein Rab-5A	Rab5a	0	0	0	0	0	0.27	32		4728	P17955	Nuclear pore glycoprotein p62	Nup62	0	0	0.2	0	0	0	12
4368	M0RCY2;P62278;Q7TP70;F1LMB4	40S ribosomal protein S13	LOC683961;Rps13;Bco2;Tex12	0	0	0	0	0	0.22	32		4777	P21816	Cysteine dioxygenase type 1	Cdo1	0	0	0.17	0	0	0	12
634	A0A0G2K2Z0;F1LT71		Eml4	0	-0.27	0	0	0	0	29		4792	P24155;A0A0G2KAW4	Thimet oligopeptidase	Thop1	0	0	0.17	0	0	0	12
4372	M0RD75;P62755	40S ribosomal protein S6	Rps6	0	0	0.09	0	0	0.34	1		4812	P27867	Sorbitol dehydrogenase	Sord	0	0	0.51	0	0	0	12
2450	D3ZT47		Fam171a2	0	-0.27	0	0	0	0	29		4819	P29066	Beta-arrestin-1	Arrb1	0	0	0.18	0	0	0	12
4378	M0RDK9		Acad8	0	0	-0.34	0	0	0	14		4863	P35433	Amidophosphoribosyltransferase	Ppat	0	0	0.28	0	0	0	12
4381	M0RDU0		F8a1	0	0	-0.24	0	0	0	28		4978	P54645	5-AMP-activated protein kinase catalytic subunit alpha-1	Prkaa1	0	0	0.51	0	0	0	12
1382	B1H2A2		Fsd1	0	-0.27	0	0	0	0	29		4999	P56819	Beta-secretase 1	Bace1	0	0	0.49	0	0	0	12
4386	O08618;Q6AZ40	Phosphoribosyl pyrophosphate synthase-associated protein 2	Prpsap2	0	0	0	0	0	0.22	32		5075	P62775	Myotrophin	Mtpn	0	0.21	0.34	0	0	0	12
4387	O08623;O08623-2;A0A0H2UHB5;O08623-3	Sequestosome-1	Sqstm1	0	0	-0.11	0	0	0.37	1		5109	P63036	DnaJ homolog subfamily A member 1	Dnaja1	0	0	0.25	0	0	0	12
4388	O08629	Transcription intermediary factor 1-beta	Trim28	0	-0.14	0	0	0.23	0.4	22		5136	P63329	Serine/threonine-protein phosphatase 2B catalytic subunit alpha isoform	Ppp3ca	0	0	0.27	0.05	0	0	12
5671	Q56R17	Importin subunit alpha	Kpna4	0	-0.27	0	0	0	0	29		5145	P68255	14-3-3 protein theta	Ywhaq	0	0	0.35	0	0.11	0	12
439	A0A0G2JZA2;P97576	GrpE protein homolog 1, mitochondrial	Grpel1	0	0	-0.19	0	0.19	0	10		5265	Q03351-2;Q03351-3;Q03351-4;Q03351;Q68G04;Q03351-8;Q03351-7;Q03351-6;Q03351-5	NT-3 growth factor receptor	Ntrk3	0	0	0.18	0	0	0	12
4391	O08662;A0A140TAJ5;Q78E76	Phosphatidylinositol 4-kinase alpha	Pi4ka	-0.25	-0.16	-0.15	0	0.14	0.13	20		5297	Q08602	Geranylgeranyl transferase type-2 subunit alpha	Rabggta	0	0	0.25	0	0	0	12
5789	Q5HZA4	LysM and putative peptidoglycan-binding domain-containing protein 1	Lysmd1	0	-0.27	0	0	0	0	29		5362	Q3KR80;Q32KK2		Arsa	0	0	0.52	0	0	0	12
4742	P19332-3;P19332-7	Microtubule-associated protein tau	Mapt	0	-0.27	0	0	0	0	29		5404	Q3KRF0;Q63615;A0A0G2K5N1;A0A0G2KAN2	Vacuolar protein sorting-associated protein 33A	Vps33a	0	0	0.17	0	0	0	12
4403	O08835	Synaptotagmin-11	Syt11	-0.25	0	0	0	0	0.36	1		5451	Q497B0	Omega-amidase NIT2	Nit2	0	0	0.22	0	0	0	12
4406	O08839-2;O08839;O08839-5;F1LMX1;O08839-3;D4A4P1;Q5HZA7;O08839-6;O08839-4	Myc box-dependent-interacting protein 1	Bin1	0	-0.29	-0.14	0	0	0	4		550	M0RBI3;D4A5Y6;B5DFB7;A0A0G2K1A0		LOC102553099;Naa50	0	0	0.42	0	-0.35	0	12
4409	O35049;D4A8L3	Sphingomyelin phosphodiesterase 3	Smpd3	-0.42	-0.34	0	0	0	0.19	37		5541	Q4KMA2	UV excision repair protein RAD23 homolog B	Rad23b	0	0	0.27	0	0	0	12
4411	O35077	Glycerol-3-phosphate dehydrogenase [NAD(+)], cytoplasmic	Gpd1	0	0	-0.39	0	0	0.19	14		5554	Q4QQV0		Tubb6	0	0	0.25	0	0	0	12
4156	G3V928;Q5I0H1		Lrp1	-0.22	0	0.07	-0.04	0.21	0.31	16		5562	Q7TPI7;Q4QR85	Methylosome protein 50	LOC100911453;Wdr77	0	0	0.27	0	0	0	12
4414	O35112	CD166 antigen	Alcam	0	0	-0.2	0	0	0	28		5586	Q4V882	Epsin-3	Epn3	0	0.22	0.27	0	0	0	12
4416	O35165	Golgi SNAP receptor complex member 2	Gosr2	-0.26	0	0	0	0	0	13		5590	Q4V888	Type 2 phosphatidylinositol 4,5-bisphosphate 4-phosphatase	Tmem55a	-0.23	0	0.17	0	0	0	12
4417	O35179	Endophilin-A1	Sh3gl2	0	-0.59	-0.41	0	0	0	33		5723	Q5CD99;A0A096MIV6;A0A096MJF8	Polypeptide N-acetylgalactosaminyltransferase	Wbscr17	0	0	0.16	0	0	0	12
4418	O35180;Q9JKT0	Endophilin-A3	Sh3gl3	0	0	0	0	0	-0.11	25		5726	Q5D023;Q62698;A0A096MIY2;O35109;O35108;Q76N43;O35110;A0A096MKA1;A0A096MIX4	Cytoplasmic dynein 1 light intermediate chain 2	Dync1li2	0	0	0.24	0	0	0	12
4419	O35244	Peroxiredoxin-6	Prdx6	0	-0.26	-0.26	0	0	0	4		5793	Q5HZE4	Methylthioribose-1-phosphate isomerase	Mri1	0	0	0.27	0	0	0	12
4399	O08776-4;O08776;O08776-2;O08776-3	NADH dehydrogenase [ubiquinone] 1 alpha subcomplex assembly factor 3	Ndufaf3	0	-0.27	0	0	0	0	29		5888	Q5PQJ6	Pyrroline-5-carboxylate reductase 3	Pycrl	0	0	0.32	0	0	0.24	12
4422	O35264	Platelet-activating factor acetylhydrolase IB subunit beta	Pafah1b2	0	-0.18	0	0.16	0	0	29		5922	Q5RJK8	Acyl-CoA-binding domain-containing protein 6	Acbd6	0	0	0.22	0	0	0	12
6061	Q5XI32;A0A0G2JYB1	F-actin-capping protein subunit beta	Capzb	-0.35	-0.4	-0.2	0	0	0	9		5930	Q5RJR9;P29457	Serpin H1	Serpinh1	0	0	0.17	0	0	0	12
4424	O35276	Neuropilin-2	Nrp2	0	0	-0.1	0	0.13	0	10		6076	Q5XI72;A0A0G2KAW7	Eukaryotic translation initiation factor 4H	Eif4h	0	0	0.36	0	0	0	12
3290	F1LM28;P97526;A0A0G2JWL3	Neurofibromin	Nf1	0	-0.27	0	0	0	0	29		6084	Q5XI86		Ptrh2	0	0	0.31	0	0	0	12
4428	O35331;G3V647;D3Z8P5	Pyridoxal kinase	Pdxk;RGD1566085	0	-0.34	-0.29	0.17	0	0	4		6106	Q5XIF2		Uros	0	0	0.56	0	0	0	12
4074	G3V856;Q5BKC9;Q6AZ62;Q9JK73	Ephexin-1	LOC100912512;Ngef	-0.36	0	-0.33	0	0	0	8		6213	Q63016	Large neutral amino acids transporter small subunit 1	Slc7a5	0	0	0.31	0	0	0	12
4430	O35353;Q45QL2;A0A0G2K8M9;D4A752	Guanine nucleotide-binding protein subunit beta-4	Gnb4	0	0.24	0.29	0	0	0	30		6232	Q63228;M0RDJ4	Glia maturation factor beta	Gmfb	0	0	0.33	0.16	0	0	12
3242	E9PSK7;B0VXR4;Q761U5;Q761U4		Mapk8ip3;JSAP1	-0.51	0	0	0	0.41	0.28	16		625	A0A0G2K2V2;G3V9N8;P52303-2;P52303	AP complex subunit beta;AP-1 complex subunit beta-1	Ap1b1	0	0.17	0.19	0	0	0	12
4433	O35458	Vesicular inhibitory amino acid transporter	Slc32a1	-0.21	0	0	0	0	0	13		6256	Q63525;A0A0G2K0V8	Nuclear migration protein nudC	Nudc	0	0	0.18	0	0	0	12
2206	D3ZJG3		P4htm	-0.51	0	0	0	0	0	26		6276	Q63635	Syntaxin-6	Stx6	0	0.17	0.18	0	0	0	12
4435	O35532	Methylsterol monooxygenase 1	Msmo1	0	-0.31	-0.36	0	0	0	4		6283	Q63707	Dihydroorotate dehydrogenase (quinone), mitochondrial	Dhodh	0	0	0.42	0	0	0	12
5432	Q3ZAU6;B2GV23		Rnf14	-0.47	-0.45	-0.22	0	0.27	0.36	21		6478	Q6AY24		Ubl7	0	0	0.24	0	0	0	12
4652	P11232;R4GNK3	Thioredoxin	Txn;Txn1	0	-0.27	0	0	0	0	29		6496	Q6AY71	Protein C8orf37 homolog		0	0	0.23	0	0	0	12
4438	O35567	Bifunctional purine biosynthesis protein PURH;Phosphoribosylaminoimidazolecarboxamide formyltransferase;IMP cyclohydrolase	Atic	0	0	0	0	0.15	0.18	32		6501	Q6AY86;A0A0G2JXT0	Vacuolar protein sorting-associated protein 26A	Vps26a	0	0	0.38	0	0	0	12
4444	O35814	Stress-induced-phosphoprotein 1	Stip1	0	-0.16	0	0	0.07	0	29		6570	Q6DGG0;M0RB67	Peptidyl-prolyl cis-trans isomerase D	Ppid;Ppidl1	0	0.15	0.26	0	0	0.13	12
493	A0A0G2K093;O35162	Heat shock 70 kDa protein 13	Hspa13	0	0	0	0	0.23	0.29	17		6592	Q6IN15;F1LPB3;O88813	Long-chain-fatty-acid--CoA ligase 5	Acsl5	0	0	0.22	0	0	0	12
4448	O35867	Neurabin-1	Ppp1r9a	0	-0.68	-0.32	0	0	0	33		6650	Q6P686	Osteoclast-stimulating factor 1	Ostf1	0	0	0.4	0	0	0	12
4451	O35889-2	Afadin	Mllt4	-0.33	0	0	0	0	0	13		6687	Q6P9V7;Q63797	Proteasome activator complex subunit 1	Psme1	0	0	0.37	0	0	0	12
2957	D4A6X4	Acylphosphatase	Acyp1	0	-0.26	0	0	0	0	29		6836	Q80WD1	Reticulon-4 receptor-like 2	Rtn4rl2	0	0	0.55	0	0	0	12
4654	P11275;F1LZG4;A0A0G2JUV8;Q924T0	Calcium/calmodulin-dependent protein kinase type II subunit alpha	Camk2a	-0.53	-1.21	-0.64	0	0	0.17	23		7102	Q9QZ86;Q5PPK6	Nucleolar protein 58	Nop58	0	0	0.22	0	0	0	12
2530	D3ZV15;A0A0U1ZFN5;A0A0U1ZEI3		Cbl	0	-0.26	0	0	0	0	29		7106	Q9QZK8	Deoxyribonuclease-2-alpha	Dnase2	0	0	0.41	0	0	0	12
4520	O88808	Tubby protein homolog	Tub	-0.51	-0.35	0	0	0	0	27		7120	Q9R1T1	Barrier-to-autointegration factor;Barrier-to-autointegration factor, N-terminally processed	Banf1	0	0	0.32	0	0	0	12
4463	O54924	Exocyst complex component 8	Exoc8	-0.23	-0.29	0	0	0.15	0	6		7134	Q9WUS0	Adenylate kinase 4, mitochondrial	Ak4	0	0	0.49	0	0	0	12
3807	F1MAH8;Q9JK25;A0A0G2K681;Q4V8P6;A0A0G2JTX8;Q5G6W1		Clip1;Rsn	0	-0.26	0	0	0	0	29		732	D4A3Z3;A0A0G2K5B0		Tbc1d24	0	0	0.32	0	0	0	12
4476	O70196;A0A0G2K1M8	Prolyl endopeptidase	Prep	0	0	0	0	0.15	0.25	32		764	A0A0G2K657;P32736-2;P32736;F1M2I5	Opioid-binding protein/cell adhesion molecule	Opcml	0	0	0.39	0	0	0.16	12
4478	O70257;M0R930;A0A0G2K6Y9	Syntaxin-7	Stx7;LOC100910446	0	0	-0.16	0	0	0	28		806	A0A0G2K737;Q920J4	Thioredoxin-like protein 1	Txnl1	0	0	0.17	0	0	0	12
4502	O88506;A0A0G2K007	STE20/SPS1-related proline-alanine-rich protein kinase	Stk39	0	-0.29	-0.12	0	0	0.23	15		843	F1LS02;A0A0G2K7T6;P37199	Nuclear pore complex protein Nup155	Nup155	0	0	0.26	0	0	0	12
4506	O88637-2;O88637	Ethanolamine-phosphate cytidylyltransferase	Pcyt2	0	0	0	0	0	0.17	32		922	A0A0G2K9J0;F1LTE0		Tanc2	0	0	0.34	0	0	0	12
1600	B2RZ68		Dcaf7	0	-0.26	0	0	0	0	29		991	A0A0G2KB46;D4AD82;P81128	Rho GTPase-activating protein 35	Arhgap35	0	0	0.21	0	0	0	12
2681	D3ZZB0		Dip2c	0	-0.26	0	0	0	0	29		1017	A0A0H2UHA6;Q9Z142	Transmembrane protein 33	Tmem33	0	-0.26	-0.12	0	0	0	13
452	A0A0G2JZG7;Q6P799	Serine--tRNA ligase, cytoplasmic	Sars	0	-0.18	0	0	0.2	0.36	22		1047	A0A0H2UHP9			0	-0.23	0	0	0	0	13
384	A0A0G2JY08			-0.51	-0.47	0	0	0	0	27		1088	A0A0K0WYI6			0	-0.23	0	0	0	0	13
6227	Q63155;F1LRN5;Q63153	Netrin receptor DCC	Dcc;DCC	-0.27	-0.45	-0.37	0	0	0	9		1111	A0A140TAC3;O88339	Epsin-1	Epn1	0	-0.24	0	0	0	0	13
4526	O88989	Malate dehydrogenase, cytoplasmic	Mdh1	0	-0.31	0	0.11	0	0	29		1166	A0A5D0		Cd200	0	-0.27	0	0	0	0	13
4527	O89035		Slc25a10	0	-0.18	-0.15	0	0	0	4		1211	A2VCW8		Sept7	0	-0.32	0	0	0	0	13
6684	Q6P9U8;D3ZL77	Eukaryotic translation initiation factor 3 subunit H	Eif3h	0	-0.26	0	0	0	0	29		125	A0A0G2JSM8			0	-0.24	0	0	0.2	0	13
137	A0A0G2JSR7;P43244;B5DEM0;Q6P6H1	Matrin-3	Matr3	-0.36	-0.28	-0.13	0	0.36	0.36	16		1254	B0BMW0;P61107;A0A1B0GWR3	Ras-related protein Rab-14	Rab14	0	-0.15	-0.12	0	0	0	13
4532	P00507	Aspartate aminotransferase, mitochondrial	Got2	-0.34	-0.24	-0.2	0	0	-0.08	20		126	A0A0G2JSN5;Q62897;A0A0G2JSW5;Q62897-3;Q62897-2	Potassium voltage-gated channel subfamily D member 3	Kcnd3	0	-0.29	0	0	0	0	13
4538	P01830	Thy-1 membrane glycoprotein	Thy1	0	-0.53	-0.19	0.2	0	0	33		1265	B0BN18	Prefoldin subunit 2	Pfdn2	0	-0.16	0	0	0	0	13
4544	P03994;A1A5N6;P03994-2	Hyaluronan and proteoglycan link protein 1	Hapln1	0	-0.27	0	0.22	0.13	0.1	15		1288	B0BN93	26S proteasome non-ATPase regulatory subunit 13	Psmd13	0	-0.12	0	0	0	0	13
4546	P04166;Q63144	Cytochrome b5 type B	Cyb5b	0	0	-0.2	0	0	0	28		1394	B1WBS4		Vps26b	0	-0.24	0	0	0	0	13
6896	Q8R4A1;Q8R4A1-2	ERO1-like protein alpha	Ero1l	-0.36	0	-0.25	0	0	0	8		1430	B1WC49		Api5	0	-0.16	0	0	0	0	13
4549	Q6P6G9;Q5I0M7;P04256;F1M2S4;D4ACJ7;A0A0G2K3G4;F1M6C7	Heterogeneous nuclear ribonucleoprotein A1;Heterogeneous nuclear ribonucleoprotein A1, N-terminally processed	Hnrnpa1;Hnrpa1	0	0	-0.13	0	0	0	28		1474	B2GV38	Ubiquitin-like protein 4A	Ubl4a	0	-0.23	0	0	0	0	13
4551	P04636;Q0QF43	Malate dehydrogenase, mitochondrial;Malate dehydrogenase	Mdh2	-0.16	-0.16	-0.11	0	0	-0.05	20		1503	B2RYA8;D4ABC2		Dnajb2	0	-0.35	0	0	0	0	13
6309	Q641Y8;Q9JIJ7	ATP-dependent RNA helicase DDX1	Ddx1	0	0	-0.05	0.17	0.31	0.45	17		154	A0A0G2JT63;D3ZX82		Cyfip2	0	-0.22	0	0	0.13	0.1	13
7084	Q9QX73;Q9QX73-2	Rho guanine nucleotide exchange factor 9	Arhgef9	-0.5	-0.49	0	0	0.35	0	27		1749	B5DFC6;M0RCH5	Glucosamine-6-phosphate isomerase	Gnpda1	0	-0.15	0	0	0	0	13
4555	P04785	Protein disulfide-isomerase	P4hb	-0.16	0	0	0	0.09	0	13		1761	B5DFI9		Pdk3	0	-0.22	0	0	0	0	13
3775	F1M9G8;Q8K3P7;A0A0G2K7W8	Histidine triad nucleotide-binding protein 3	Hint3	0	-0.26	0	0	0	0	29		187	A0A0G2JTS3;B2RZ78;B2RZ78-2	Vacuolar protein sorting-associated protein 29	Vps29	0	-0.35	0	0	0	0	13
4558	P05065;Q6AY07	Fructose-bisphosphate aldolase A;Fructose-bisphosphate aldolase	Aldoa;Aldoart2	-0.27	-0.47	-0.3	0.05	0.11	0	9		1962	D3ZBZ6		Disp2	0	-0.35	0	0	0	0	13
4004	G3V7G8;Q5I0G4	Glycine--tRNA ligase	Gars	0	0	0	0.22	0.36	0.44	17		1993	D3ZCU8		Rab33a	0	-0.34	0	0	0.3	0	13
284	A0A0G2JVU1;D3ZP06	Integrin beta	Itgb8	0	-0.26	0	0	0	0	29		2027	D3ZE15;F1LZC5		LOC100911483;Ndufa13	0	-0.15	0	0	0	0	13
4561	P05370	Glucose-6-phosphate 1-dehydrogenase	G6pdx	0	0	0	0	0.16	0.22	32		209	A0A0G2JU89;F1LQI5;Q2TL32	E3 ubiquitin-protein ligase UBR4	Ubr4	0	-0.17	0	0	0	0	13
642	A0A0G2K350;D4A0E2		Napg	-0.35	-0.45	-0.31	0	0	0	9		2174	D3ZII1		Rftn2	0	-0.31	0	0	0	0	13
6766	Q75Q39;R9PXR4	Mitochondrial import receptor subunit TOM70	Tomm70a	-0.24	-0.36	-0.21	0	0	0	9		2346	D3ZPN0		Pcdh17	0	-0.35	0	0	0	0	13
2973	D4A781;M0RB74		Ipo5	0	0	0	0	0.22	0.36	17		2420	D3ZS58	NADH dehydrogenase [ubiquinone] 1 alpha subcomplex subunit 2	Ndufa2	0	-0.26	0	0	0	-0.25	13
7003	Q9ERH3;Q9ERH3-2	WD repeat-containing protein 7	Wdr7	-0.18	-0.43	-0.31	0	0	0	9		253	A0A0G2JV54;Q9Z118	Polypyrimidine tract-binding protein 3	Ptbp3	0	-0.28	0	0	0	0	13
4572	P06686	Sodium/potassium-transporting ATPase subunit alpha-2	Atp1a2	-0.23	0	0	-0.1	0	0	13		259	A0A0G2JVB6;G3V7P1;A0A0G2K4U8	Syntaxin-12	Stx12	0	-0.16	0	0	0	0	13
7086	Q9QXY2-2;Q9QXY2	SRC kinase signaling inhibitor 1	Srcin1	-0.33	-0.41	-0.28	0	0	0	9		2698	D3ZZR5;D3ZLF6		Snrpa1	0	-0.27	0	0	0	0	13
4574	P06761	78 kDa glucose-regulated protein	Hspa5	0	0.13	0	0	0.13	0.18	32		2724	D4A0C3		Hid1	0	-0.3	0	0	0	0	13
4413	O35095	Neurochondrin	Ncdn	-0.2	-0.31	-0.19	0.22	0.43	0.56	16		2735	D4A0X3		Btbd8	0	-0.33	0	0	0	0	13
4580	P07171	Calbindin	Calb1	0	-0.7	-0.57	0.37	0.3	0	2		2752	D4A197		Mcee	0	-0.29	0	0	0	0	13
4582	P07323	Gamma-enolase	Eno2	0	-0.3	-0.24	0	0	0	4		287	A0A0G2JVW5;E9PSZ5;Q5RJQ1		Huwe1	0	-0.22	0	0	0	0	13
4583	P07335	Creatine kinase B-type	Ckb	-0.18	-0.17	0	0	0.09	0	6		2881	D4A4T0;I6L9H8		Stub1	0	-0.21	0	0	0	0	13
766	A0A0G2K677;Q5BJU8		Sptbn4	-0.32	-0.47	-0.29	0	0	0	9		3093	D4AAU4		Rprd1a	0	-0.24	0	0	0	0	13
6638	Q6NX65	Programmed cell death protein 10	Pdcd10	0	-0.26	0	0	0	0	29		3144	D4ACG2		Ilvbl	0	-0.22	0	0	0	0	13
981	A0A0G2KAW2;Q5JCS7;O35412;F1LS65;A0A0G2K2Z9;D3ZQP5	Signal-induced proliferation-associated 1-like protein 1	Sipa1l1	-0.37	-0.53	-0.2	0	0	0	9		3191	D4ADS9		Efr3a	0	-0.19	0	0	0	0	13
3268	E9PTG1;A0A0G2JUS4;Q6DUH4		Smarca2	0	-0.26	0	0	0	0	29		3215	D4AEC2;A0A0G2K7K9		Camsap2	0	-0.29	0	0	0	0	13
4594	P07943	Aldose reductase	Akr1b1	0	0	0	0	0	0.15	32		3221	D4AEH3		Psmd7	0	-0.15	0	0	0	0	13
4595	P08009;A0A0G2K4U2	Glutathione S-transferase Yb-3	Gstm3	0	-0.65	-0.56	0.21	0	0	2		3288	F1LM09;Q4VSI4	Ubiquitin carboxyl-terminal hydrolase;Ubiquitin carboxyl-terminal hydrolase 7	Usp7	0	-0.21	-0.08	0	0	0	13
4596	P08050;Q6Q6S2	Gap junction alpha-1 protein	Gja1	-0.3	0	0.11	0	0	0	13		3312	Q3B8P5;F1LMQ3		Psmd8	0	-0.14	0	0	0	0	13
2955	D4A6U1;A0A1W2Q6C2		Adam11	-0.63	-0.9	-0.52	0	0	0	23		3323	F1LMZ8	26S proteasome non-ATPase regulatory subunit 11	Psmd11	0	-0.27	0	0	0	0	13
4571	P06685;Q64608	Sodium/potassium-transporting ATPase subunit alpha-1	Atp1a1	-0.29	-0.58	-0.4	0	0	0	18		3329	F1LN59;Q5BJU2		Eif4g2	0	-0.26	0	0	0	0.25	13
6579	Q6GMN2-2;Q6GMN2	Brain-specific angiogenesis inhibitor 1-associated protein 2	Baiap2	-0.72	-0.83	-0.33	0	0	0	23		3336	F1LNC4;P58200	Vesicle transport through interaction with t-SNAREs homolog 1B	Vti1b	0	-0.32	0	0	0	0	13
4610	P09456;Q6LCA5	cAMP-dependent protein kinase type I-alpha regulatory subunit;cAMP-dependent protein kinase type I-alpha regulatory subunit, N-terminally processed	Prkar1a	0	0	0	0	0	0.32	1		3403	F1LQC1;P07872-2;P07872;F1M609	Acyl-coenzyme A oxidase;Peroxisomal acyl-coenzyme A oxidase 1;Peroxisomal acyl-CoA oxidase 1, A chain;Peroxisomal acyl-CoA oxidase 1, B chain;Peroxisomal acyl-CoA oxidase 1, C chain	Acox1	0	-0.26	0	0	0	0	13
3692	F1M625;A0A0G2K2V1	Ubiquitin carboxyl-terminal hydrolase	Usp46	0	-0.26	0	0	0	0	29		3411	F1LQI6		Zer1	0	-0.27	0	0	0	0	13
4612	P09527;A0A0G2K930	Ras-related protein Rab-7a	Rab7a	-0.23	0	0	0.1	0.18	0	13		3415	F1LQN3;Q9JK11;Q5U1Z3	Reticulon;Reticulon-4	Rtn4	-0.22	-0.3	0	0	0.22	0	13
4613	P09606	Glutamine synthetase	Glul	0	0	0.31	-0.26	0	0	30		3458	F1LRS2;A0A0G2K3H2;B2RZA1;Q45N69		Dock7	0	-0.26	0	0	0	0	13
4616	P09895;D3ZHP8	60S ribosomal protein L5	Rpl5;Rpl5l1	0	0	0	0	0	0.17	32		3556	F1LWG4		Ndufaf1	0	-0.27	0	0	0	0	13
1269	B0BN30;A0A1W2Q6G8;Q4G025		Mtch1	-0.5	-0.36	0	0	0	0	27		3557	F1LWK7;A0A0G2K7Z4		Ablim1	0	-0.16	0	0	0	0	13
5794	Q5HZV9;R9PXV7	Protein phosphatase 1 regulatory subunit 7	Ppp1r7	0	-0.39	-0.27	0	0.12	0.16	24		3652	F1M392		Limch1	0	-0.17	0	0	0	0	13
4638	P0DP31;P0DP30;P0DP29;D4ABV5;M0RCJ6;Q304F3		Calm2;Calm3;Tnnc2	-0.37	-0.37	-0.15	0	0.16	0.28	37		3667	F1M446		AI314180	0	-0.16	0	0	0	0	13
3876	F8WG91;P37996	ADP-ribosylation factor-like protein 3	Arl3	0	-0.38	-0.2	0.12	0.26	0.36	24		3678	F1M4N6		Dock3	0	-0.24	0	0	0	0.18	13
2033	D3ZE55-2;D3ZE55	Protocadherin-8	Pcdh8	1.55	0.48	0.25	0	0.54	0	31		3737	F1M836;A0A0G2JU56;Q8VHF0;A0A1B0GWN5	MAP/microtubule affinity-regulating kinase 3	Mark3	0	-0.18	0	0	0	0	13
4643	P10687;F1M084;R9PXY3	1-phosphatidylinositol 4,5-bisphosphate phosphodiesterase beta-1;Phosphoinositide phospholipase C	Plcb1	0	-0.29	0	0	0	-0.06	29		3860	Q6IRL2;F7FHF7;Q8R500	Mitofusin-2	LOC100911485;Mfn2	0	-0.17	0	0	0	0	13
4647	P10824	Guanine nucleotide-binding protein G(i) subunit alpha-1	Gnai1	0	-0.35	-0.35	0.08	0	0	4		3953	G3V6U3;Q3B8P6		Alg2	0	-0.2	0	0	0	0	13
4648	P10860;Q7TPI5	Glutamate dehydrogenase 1, mitochondrial	Glud1	-0.21	0	0	0	0	0	13		4023	G3V7L6;Q63347	26S protease regulatory subunit 7	Psmc2	0	-0.15	0	0	0	0.11	13
4649	P10888	Cytochrome c oxidase subunit 4 isoform 1, mitochondrial	Cox4i1	0	-0.26	-0.19	0	0	0.13	4		4155	G3V927;P97839	Disks large-associated protein 4	Dlgap4	0	-0.32	0	0	0	0	13
4650	Q6P7A4;P10960;F7EPE0	Sulfated glycoprotein 1	Psap	0	0	0.13	0	0.19	0.31	17		4164	G3V963;Q80WF4	Transmembrane protein 132A	Tmem132a	0	-0.18	0	0	0	0	13
2938	D4A6C5		Arhgap1	0	-0.25	0	0	0	0	29		4200	G3V9T7;Q4G022	ATPase Asna1;Arsenical pump-driving ATPase	Asna1	0	-0.23	0	0	0	0	13
7128	Q9WUC4	Copper transport protein ATOX1	Atox1	0	-0.25	0	0	0	0	29		4213	H2BF30;Q920R3	Fatty acid desaturase 1	Fads1	0	-0.31	0	0	0	0	13
4653	P11240	Cytochrome c oxidase subunit 5A, mitochondrial	Cox5a	0	-0.24	-0.19	-0.18	0	0	4		4373	M0RDD7;Q498T2-2;Q498T2	Chromatin target of PRMT1 protein	Chtop	0	-0.25	0	0	0	0	13
6221	Q63092;A0A0G2K1R5	CaM kinase-like vesicle-associated protein	Camkv	-0.5	-0.89	-0.53	0	0	0	23		4444	O35814	Stress-induced-phosphoprotein 1	Stip1	0	-0.15	0	0	0.1	0	13
4656	P11348	Dihydropteridine reductase	Qdpr	0	0	0	0	0.09	0	25		4513	O88775;A0A0G2JWP4;A0A0G2JU92	Embigin	Emb	0	-0.29	0	0	0	0	13
4639	P10111;A0A0G2K1P0;A0A0G2K2E4;M0RCZ9	Peptidyl-prolyl cis-trans isomerase A;Peptidyl-prolyl cis-trans isomerase A, N-terminally processed;Peptidyl-prolyl cis-trans isomerase	Ppia;RGD1559682	0	-0.36	-0.16	0.08	0	0.16	24		4554_m	P04775;F1M9G9;A0A0G2K207;A9JQD7	Sodium channel protein type 2 subunit alpha	Scn2a	0	-0.35	0	0	0	0	13
7166	Q9Z1T4;Q9Z1T4-2	Connector enhancer of kinase suppressor of ras 2	Cnksr2	-0.69	-0.74	-0.41	0	0	0	23		4734	Q6IE67;P18422	Proteasome subunit alpha type;Proteasome subunit alpha type-3	Psma3	0	-0.15	0	0	0	0	13
6076	Q5XI72;A0A0G2KAW7	Eukaryotic translation initiation factor 4H	Eif4h	0	-0.25	0	0	0	0	29		4746_m	P19491;P19491-2;P19491-3;G3V914;F1LNE4	Glutamate receptor 2	Gria2	-0.14	-0.12	-0.06	0	0.05	0	13
4661	P11507;P11507-2;Q71UZ2;Q63080	Sarcoplasmic/endoplasmic reticulum calcium ATPase 2	Atp2a2	-0.27	-0.28	-0.13	-0.32	-0.13	0	20		4764	P20417	Tyrosine-protein phosphatase non-receptor type 1	Ptpn1	0	-0.21	0	0	0	0	13
4663	P11654	Nuclear pore membrane glycoprotein 210	Nup210	0	0	0	0	0	0.16	32		4771	P21571	ATP synthase-coupling factor 6, mitochondrial	Atp5j	0	-0.18	0	0	0	0	13
4664	P11730;P11730-3;P11730-2	Calcium/calmodulin-dependent protein kinase type II subunit gamma	Camk2g	-0.48	-0.52	-0.21	0	0	0.09	3		4807	P27008	Poly [ADP-ribose] polymerase 1	Parp1	0	-0.19	0	0	0	0	13
4665	P11762	Galectin-1	Lgals1	0	0	0.27	0	0	0	30		4871	P35565	Calnexin	Canx	0	-0.14	0	0	-0.11	0	13
4932	P49620	Diacylglycerol kinase gamma	Dgkg	-0.57	-0.89	-0.43	0	0	0	23		493	A0A0G2K093;O35162	Heat shock 70 kDa protein 13	Hspa13	0	-0.22	0	0	0	0	13
4669	P11980	Pyruvate kinase PKM	Pkm	0	-0.53	-0.25	0	0	0	33		4930	P49187;A0A0U1RRS7;B0VXR6;A0A0U1RVI2	Mitogen-activated protein kinase 10;Mitogen-activated protein kinase	Mapk10	0	-0.26	0	0	0.11	0	13
4832	P31016;A0A0G2K7F5;P97630	Disks large homolog 4	Dlg4	-0.65	-0.73	-0.5	0	0	0	23		4942	P50475	Alanine--tRNA ligase, cytoplasmic	Aars	0	-0.2	-0.12	0	0	0.14	13
4671	P12075	Cytochrome c oxidase subunit 5B, mitochondrial	Cox5b	0	0	0	-0.17	0	0	25		4943	P50503	Hsc70-interacting protein	St13	0	-0.15	0	0	0	0	13
4675	P12711	Alcohol dehydrogenase class-3	Adh5	0	0	-0.21	0	0	0	28		5021	P60881;F8WG75	Synaptosomal-associated protein 25;Synaptosomal-associated protein	Snap25	0	-0.34	0	0	0	0	13
7083	Q9QX69	LanC-like protein 1	Lancl1	0	-0.35	-0.16	0.19	0.15	0.26	24		5030	P61212	ADP-ribosylation factor-like protein 1	Arl1	0	-0.18	0	0	0	0	13
4677	P12839;G3V7S2	Neurofilament medium polypeptide	Nefm	0	-0.54	-0.31	0	0	0	33		5052	P62193	26S protease regulatory subunit 4	Psmc1	0	-0.15	0	0	0	0	13
6025	Q5U355;Q8R4E1	T-cell immunomodulatory protein	Itfg1	0	0	0	0	0.31	0.49	17		5053	P62198;O35050	26S protease regulatory subunit 8	Psmc5	0	-0.13	0	0	0	0	13
4683	P13221	Aspartate aminotransferase, cytoplasmic	Got1	-0.18	-0.38	-0.22	0.09	0.07	0	9		5107	P63029;F1LYR7	Translationally-controlled tumor protein	Tpt1	0	-0.25	0	0	0	0	13
828	A0A0G2K7L2;F1LZ40		Igsf3	0	-0.25	0	0	0	0	29		5123	P63102;A0A0G2JV65	14-3-3 protein zeta/delta	Ywhaz	0	-0.19	-0.08	0	0.16	0	13
4242	M0R4V4;A0A0G2JVD2;B8ZHC9		Slc25a23;Slc25a41	-0.35	0	-0.28	0	0	0	8		5149	P69682	Adaptin ear-binding coat-associated protein 1	Necap1	0	-0.19	0	0	0	0	13
4764	P20417	Tyrosine-protein phosphatase non-receptor type 1	Ptpn1	0	-0.25	0	0	0	0	29		5177	P82995;Q6B437	Heat shock protein HSP 90-alpha	Hsp90aa1	0	-0.23	-0.11	0	0	0	13
4687	Q5U328;P13383;C1KE06	Nucleolin	Ncl	0	0	0	0.11	0	0	25		5254	Q02356;A0A0G2K3U1	AMP deaminase 2	Ampd2	0	-0.16	0	0	0	0	13
4688	Q6PDV6;P13471	40S ribosomal protein S14	Rps14	0	0	0	0	0	0.29	32		5289	Q07310-3;Q07310-17;Q07310;Q07310-19;Q07310-18;Q07310-8;Q07310-6;Q07310-5;Q07310-4;Q07310-2;Q07310-14;Q07310-13;Q07310-12;Q07310-11;Q07310-16;Q07310-15;Q07310-10;Q07310-9	Neurexin-3	Nrxn3	0	-0.25	0	0	0	0	13
469	A0A0G2JZS1;Q56R15;Q3KR98;F1LT58	Importin subunit alpha	Kpna6	-0.28	0	0	0	0	0	13		5366	Q32PY7;A0A0G2K226		Nudcd3	0	-0.2	0	0	0	0	13
4690	P13803	Electron transfer flavoprotein subunit alpha, mitochondrial	Etfa	-0.23	0	-0.11	0	0	0	13		5368	Q32PZ7;B0BND9		Srp72	0	-0.32	0	0	0	0	13
4697	P14562;A0A0U1RRS9	Lysosome-associated membrane glycoprotein 1	Lamp1	0	0	0	0	0.18	0.2	32		5398	Q3KRD5	Mitochondrial import receptor subunit TOM34	Tomm34	0	-0.28	0.19	0	0	0	13
47	A0A1W2Q6E9;A0A096MK30;O35763	Moesin	Msn	0	0.43	0.26	0	0	0	12		5487	Q4FZT9	26S proteasome non-ATPase regulatory subunit 2	Psmd2	0	-0.14	0	0	0	0	13
2002	D3ZD48		Rab11fip2	0	-0.25	0	0	0	0	29		5690	Q5BJS0;A0A0G2JW51	Putative ATP-dependent RNA helicase DHX30	Dhx30	0	-0.17	0	0	0	0	13
4701	Q66HH8;P14668;O70371	Annexin;Annexin A5	Anxa5	0	0	-0.21	0	0	0	28		5749	Q5FVH2	Phospholipase D3	Pld3	0	-0.2	0	0	0	0	13
4703	P14841	Cystatin-C	Cst3	0	0	0.19	0	0	0	25		575	A0A0G2K1P1;D3ZTB0		Mtmr7	0	-0.36	0	0	0	0	13
2253	D3ZL45		RGD1560784	1.51	0	0	0	0	0	31		576	A0A0G2K1Q8;Q5M866		Abca3	0	-0.28	0	0	0	0	13
4709	P15431	Gamma-aminobutyric acid receptor subunit beta-1	Gabrb1	0	-0.57	-0.38	0	0.21	0	33		582	A0A0G2K1U9;M0R686		Irgq	0	-0.28	0	0	0	0	13
4710	P15650	Long-chain specific acyl-CoA dehydrogenase, mitochondrial	Acadl	0	0.17	0	0	0.11	0.13	32		5828	Q5M7U6	Actin-related protein 2	Actr2	0	-0.15	0	0	0.1	0	13
2689	D3ZZK3	Receptor protein-tyrosine kinase	Epha4	-0.48	-0.62	-0.39	0	0	0	18		5882	Q5PPJ4	Deoxyhypusine hydroxylase	Dohh	0	-0.25	0	0	0	0	13
4716	P16446;R9PXS4	Phosphatidylinositol transfer protein alpha isoform	Pitpna	0	-0.35	-0.12	0	0	0	4		5886	Q5PPM8	Type 1 phosphatidylinositol 4,5-bisphosphate 4-phosphatase	Tmem55b	0	-0.35	0	0	0	0	13
3237	E1AW38;Q02294;O89089;F1LQ87;F1LRE0;Q6XS93;Q6XS92	Voltage-dependent N-type calcium channel subunit alpha-1B	Cacna1b	-0.33	0	-0.22	0	0	0	8		598	Q6TXG4;A0A0G2K283		Dhx8	0	-0.16	0	0	0	0	13
4718	P16970	ATP-binding cassette sub-family D member 3	Abcd3	-0.32	0	0	0	0	0	13		6030	Q5U3Y8;M0R5M7	Transcription factor BTF3	Btf3;RGD1563812	0	-0.24	0	0	0	0	13
4719	P16975	SPARC	Sparc	0	0.39	0.5	0	0.47	0.63	7		6079	Q5XI77;D3ZHD1	Annexin	Anxa11;Anxa13	0	-0.37	0	0	0.14	0	13
472	A0A0G2JZU6;D3ZRB9		Tmeff2	0	0	0	0	0	0.34	1		6116	Q5XIG8;M0RCV0	Serine-threonine kinase receptor-associated protein	Strap;LOC100910575	0	-0.23	0	0	0	0	13
4720	P17046	Lysosome-associated membrane glycoprotein 2	Lamp2	-0.07	0	0	0	0	0	25		6130	Q5XIK2	Thioredoxin-related transmembrane protein 2	Tmx2	0	-0.23	0	0	0	0	13
4960	P52481	Adenylyl cyclase-associated protein 2	Cap2	-0.45	-0.92	-0.46	0.07	0	0.08	23		6242	Q63396	Activated RNA polymerase II transcriptional coactivator p15	Sub1	0	-0.29	0	0	0	0	13
1477	B2GV54	Neutral cholesterol ester hydrolase 1	Nceh1	-0.21	-0.17	-0.22	0	0.22	0.31	16		6290	Q63827;F1LM54;Q04589;Q62992	Fibroblast growth factor receptor;Fibroblast growth factor receptor 1	Fgfr1;Fgfr1-ps1	0	-0.36	0	0	0	0	13
4726	P17425	Hydroxymethylglutaryl-CoA synthase, cytoplasmic	Hmgcs1	-0.24	-0.32	0	0	0.75	0.83	11		6337	Q64560	Tripeptidyl-peptidase 2	Tpp2	0	-0.18	-0.09	0	0	0	13
4727	P17764	Acetyl-CoA acetyltransferase, mitochondrial	Acat1	0	-0.3	-0.2	0	0	0	4		6349	Q66H09		Ttc1	0	-0.24	0	0	0	0	13
4728	P17955	Nuclear pore glycoprotein p62	Nup62	0	0	0	0	0	0.21	32		6366	Q66H79		Trim32	0	-0.24	0	0	0	0	13
563	A0A0G2K1I6;P56603;A0A0G2JY82;Q5D009	Secretory carrier-associated membrane protein 1	Scamp1	0	-0.25	0	0	0	0	29		6373	Q66HA8	Heat shock protein 105 kDa	Hsph1	-0.18	-0.32	0	0	0.09	0	13
236	A0A0G2JUT7			0	-0.25	0	0	0	0	29		6380	Q66HE3		Wsb2	0	-0.17	0	0	0	0	13
5766	Q5FVM4	Non-POU domain-containing octamer-binding protein	Nono	-0.26	0	0	0	0.19	0.45	16		6412	Q68FR6	Elongation factor 1-gamma	Eef1g	0	-0.2	0.08	0	0	0.13	13
4732	P18418	Calreticulin	Calr	-0.28	0	0	0	0	0	13		6428	Q68FW4	Syntaxin-18	Stx18	0	-0.37	0	0	0	0	13
2164	D3ZI07	Kinesin-like protein	Kif3b	0	0	0	0	0.45	0.63	11		6436	Q68FX9	NAD-dependent protein deacylase sirtuin-5, mitochondrial	Sirt5	0	-0.27	0	0	0	0	13
5883	Q5PPJ6		Lars	0	0	0	0	0.16	0.45	17		6471	Q6AY09	Heterogeneous nuclear ribonucleoprotein H2	Hnrnph2	0	-0.28	0	0	0	0	13
4735	P18484;A0A0G2K943	AP-2 complex subunit alpha-2	Ap2a2	0	0	0	0	0.12	0	10		652	A0A0G2K3D9;M0R9H6;F1LVX6		Tmem132b	0	-0.2	0	0	0	0	13
4740	P19139	Casein kinase II subunit alpha	Csnk2a1	0	-0.25	0	0	0.11	0.19	15		6535	Q6AYK6	Calcyclin-binding protein	Cacybp	0	-0.33	0	0	0	0	13
6852	Q812E9;Q812E9-2;A0A1B0GWN8	Neuronal membrane glycoprotein M6-a	Gpm6a	-0.32	-0.63	-0.28	0	0	0	18		6675	Q6P7P5	Basic leucine zipper and W2 domain-containing protein 1	Bzw1	0	-0.18	0	0	0	0	13
952	A0A0G2KA14			0	-0.25	0	0	0	0	29		6686	Q6P9V6;P34064	Proteasome subunit alpha type;Proteasome subunit alpha type-5	Psma5	0	-0.12	0	0	0.11	0	13
4745_m	P19490;P19490-2	Glutamate receptor 1	Gria1	-0.77	-0.72	-0.33	0	0	0	23		6689	Q6P9X1;Q04753	Methylosome subunit pICln	Clns1a	0	-0.19	0	0	0	0	13
4746_m	P19491;P19491-2;P19491-3;G3V914;F1LNE4	Glutamate receptor 2	Gria2	-0.64	-0.65	-0.3	0	0	0.28	3		6693	Q6PCT9		Psmd6	0	-0.14	0	0	0	0	13
4747_m	P19492;P19492-2;G3V6Z5;G3V8Y9	Glutamate receptor 3	Gria3	0	-0.65	-0.45	0	0	0	2		6751	Q6XVN8	Microtubule-associated proteins 1A/1B light chain 3A	Map1lc3a	0	-0.32	0	0	0	0	13
4749	P19511	ATP synthase F(0) complex subunit B1, mitochondrial	Atp5f1	0	0	-0.18	0	0	0	28		6762	Q71SY3;Q7TP02;E9PT79;A0A1B0GWQ7		Tsn	0	-0.15	0	0	0	0	13
3984	G3V746;Q00960	Glutamate receptor ionotropic, NMDA 2B	Grin2b	-0.5	-0.69	-0.46	0	0	0	18		6771	Q767H7		Pcdhac2	0	-0.21	0	0	0	0	13
4750	P19527	Neurofilament light polypeptide	Nefl	0	-0.49	-0.37	0	0	0	33		6782	Q78PB6;Q78PB6-2	Nuclear distribution protein nudE-like 1	Ndel1	0	-0.27	0	0	0	0	13
4751	P19627	Guanine nucleotide-binding protein G(z) subunit alpha	Gnaz	0	0	-0.28	0	0	0	28		6789	Q7M0E3;Q7M094	Destrin	Dstn	0	-0.18	0	0	0	0	13
4754	Q5U330;Q8CJD2;P19686	Guanylate cyclase soluble subunit alpha-3	Gucy1a3	0	-0.48	0	0	0	0.19	36		6828	Q80U96;Q9WUW7	Exportin-1	Xpo1	0	-0.28	0	0.07	0.07	0.19	13
4755	P19804	Nucleoside diphosphate kinase B	Nme2	0	0	-0.24	0	0	0	28		684	B0BN52;A0A0G2K459;A0A0G2K7P7		Mtch2	0	-0.25	0	0	0	0	13
4758	P19945;D3ZJT4	60S acidic ribosomal protein P0	Rplp0;RGD1564469	0	0	0	0	0	0.23	32		6844	Q80ZG1;B1H241;A0A1L1WKK3	Synembryn-A	Ric8a	0	-0.2	0	0	0	0	13
4722	P17105	Inositol-trisphosphate 3-kinase A	Itpka	-0.77	-1.4	-0.7	0	0	0	23		6944	Q924S1;A0A0G2JWH4	1-acyl-sn-glycerol-3-phosphate acyltransferase delta	Agpat4	0	-0.17	0	0	0	0	13
4760	P20070-3;P20070;P20070-2	NADH-cytochrome b5 reductase 3;NADH-cytochrome b5 reductase 3 membrane-bound form;NADH-cytochrome b5 reductase 3 soluble form	Cyb5r3	0	0	0	0.14	0	0	25		7071	Q9JMB5	Proteasomal ubiquitin receptor ADRM1	Adrm1	0	-0.12	0	0	0	0	13
4512	Q9QUI9;O88768;A0A0G2K7U5;Q63629;D3ZQG5;Q9JK15	Arf-GAP with dual PH domain-containing protein 2	Adap1;Adap2	0	-0.24	0	0	0	0	29		708	A0A0G2K4T3;Q5FVC7	Arf-GAP with coiled-coil, ANK repeat and PH domain-containing protein 2	Acap2	0	-0.25	0	0	0	0	13
5283	Q06647	ATP synthase subunit O, mitochondrial	Atp5o	0	-0.24	0	0	0	0	29		709	A0A0G2K4T7;Q5U2Y1-2;Q5U2Y1;A0A1B0GWN0;A0A1B0GWM4	General transcription factor II-I	Gtf2i	0	-0.15	0	0	0	0	13
5164	P70587-2;F1M4K6;P70587-3;P70587;P70587-5;P70587-4;A0A0A0MXW8;F1LMG7;B8Q4H4;B8Q4H5;B8Q4H3;B8Q4F8;B8Q4G6;B8Q4H0;B8Q4G8;B8Q4G3;B8Q4G4;B8Q4G9;B8Q4G5;B8Q4G2;B8Q4F9;B8Q4H1;B8Q4G1;B8Q4G0;B8Q4H2;B8Q4G7	Leucine-rich repeat-containing protein 7	Lrrc7	-0.41	-0.62	-0.32	0	0	0	18		7108	Q9R066;Q9R066-2	Coxsackievirus and adenovirus receptor homolog	Cxadr	0	-0.32	0	0	0	0	13
4767	P20651;A0A0G2K7T5	Serine/threonine-protein phosphatase 2B catalytic subunit beta isoform	Ppp3cb	0	-0.53	-0.4	0	0	0	33		7178	Q9Z2I7;A0A0G2JZX3	Synaptic vesicle 2-related protein	Svop	0	-0.17	0	0	0	0	13
4769	P20788	Cytochrome b-c1 complex subunit Rieske, mitochondrial;Cytochrome b-c1 complex subunit 11	Uqcrfs1	0	-0.15	-0.2	0	0	0	28		720	A0A0G2K532;D4A1J9	Leucine-rich repeat and fibronectin type-III domain-containing protein 5	Lrfn5	0	-0.29	0	0	0	0	13
4770	P21531;A0A0U1RRY5	60S ribosomal protein L3	Rpl3	0	0	0	0	0	0.31	1		722	A0A0G2K542;Q4V8I9;Q5XFW3		Ugp2	0	-0.29	0	0.11	0.05	0	13
4771	P21571	ATP synthase-coupling factor 6, mitochondrial	Atp5j	0	0	-0.18	0	0	0	28		723	A0A0G2K543;D4A5B3		C2cd5	0	-0.14	0	0	0	0	13
4773	P21707;Q707P0	Synaptotagmin-1	Syt1	0	-0.42	-0.3	0	0	0	33		731	A0A0G2K5A4;D3ZLD5		Golga3	0	-0.2	0	0	0	0	13
4774	P21708;P21708-2	Mitogen-activated protein kinase 3	Mapk3	0	0	-0.28	0	0	0.25	14		795	A0A0G2K6X6;O08679	Serine/threonine-protein kinase MARK2	Mark2	0	-0.21	0	0	0	0	13
6220	Q63083;Q6P6Q3	Nucleobindin-1	Nucb1	-0.24	0	0	0	0.33	0.25	16		831	A0A0G2K7M2;Q5XFX7		Rad23a	0	-0.23	0	0	0	0	13
4779	P21913	Succinate dehydrogenase [ubiquinone] iron-sulfur subunit, mitochondrial	Sdhb	0	0	-0.27	0	0	0	28		837	F1M8G9;A0A0G2K7P9;Q6RKB3;A0A0G2K7R3;Q6RKB2		Ncam2	0	-0.26	-0.12	0	0.12	0	13
4780	P22062;A0A140TAB9	Protein-L-isoaspartate(D-aspartate) O-methyltransferase	Pcmt1	0	-0.27	-0.3	0	0	0	4		891	G3V6S0;Q6XD99;A0A0G2K8W9		Sptbn1	0	-0.27	0	0	0	0	13
4783	Q68G44;P22791	Hydroxymethylglutaryl-CoA synthase, mitochondrial	Hmgcs2	0	0	-0.3	0	0	0	14		1171	A0JPJ7	Obg-like ATPase 1	Ola1	0	0	0.43	0	0.29	0.4	14
4784	P23514	Coatomer subunit beta	Copb1	0	-0.11	0	0	0.27	0.41	22		1542	B2RYN0;D3ZFX4		Pgm3	0	0.13	0.41	0	0.27	0.32	14
4787	P23711	Heme oxygenase 2	Hmox2	0	0	-0.11	0	0.27	0	10		1611	B2RZA9		Ube2l3	0	0	0.27	0	0	0.32	14
4790	P23978	Sodium- and chloride-dependent GABA transporter 1	Slc6a1	0	-0.28	-0.34	0	0	0	4		1798	C7C5T2;P47860;A0A0A0MXY5	ATP-dependent 6-phosphofructokinase;ATP-dependent 6-phosphofructokinase, platelet type	Pfkp	0	0	0.47	0.1	0.22	0.23	14
4792	P24155;A0A0G2KAW4	Thimet oligopeptidase	Thop1	0	0	-0.24	0.13	0	0	28		2001	D3ZD23		Abce1	0	0	0.4	0	0	0.29	14
4793	Q6P6T6;P24268	Cathepsin D;Cathepsin D 12 kDa light chain;Cathepsin D 9 kDa light chain;Cathepsin D 34 kDa heavy chain;Cathepsin D 30 kDa heavy chain	Ctsd	0	0	0.34	0	0	0.24	7		2008	D3ZD89;M0RC73		Naa15;Naa16	0	0	0.3	0	0	0.46	14
4794	P24329	Thiosulfate sulfurtransferase	Tst	-0.19	0	0	0	0	0	13		2321	D3ZNQ6		Ube2m	0	0	0.28	0	0.18	0.32	14
4795	P24368	Peptidyl-prolyl cis-trans isomerase B	Ppib	-0.14	0	0	0	0	0	13		2466	D3ZTK0		Ttc9b	0	0	0.67	0	0	0.64	14
964	A0A0G2KAB2;Q9Z2A6	Mitogen-activated protein kinase 15	Mapk15	-0.52	-0.62	-0.33	0	0	0	18		2691	D3ZZL3		Naglu	0	0	0.45	0	0	0.34	14
480	A0A0G2JZZ4			0	0	-0.28	0	0	0	28		2922	D4A5R0;D3ZUZ9	Peptidyl-prolyl cis-trans isomerase	Ppih	0	0	0.28	0	0	0.43	14
4800	Q4FZZ4;P26284;D4A5G8	Pyruvate dehydrogenase E1 component subunit alpha;Pyruvate dehydrogenase E1 component subunit alpha, somatic form, mitochondrial	LOC100365902;Pdha1;Pdha1l1	0	0	-0.16	0	0	0	28		3076	D4AA31		Prcp	0	0	0.44	0	0	0.53	14
2982	D4A7H9		Chmp7	0	-0.24	0	0	0	0	29		3145	D4ACG7;H1UBM5		Cpne6	-0.11	0.21	0.31	0.07	0.2	0.28	14
4804	P26769;F1LV12	Adenylate cyclase type 2	Adcy2	0	-0.36	0	0	0	0.4	15		3281	E9PU28;Q6P9U9	Inosine-5-monophosphate dehydrogenase 2;Inosine-5-monophosphate dehydrogenase	Impdh2	0	0	0.22	0	0.16	0.44	14
4805	P26772;P97601;A0A0G2JTG1	10 kDa heat shock protein, mitochondrial	Hspe1	0	-0.09	0	0	0	0	25		3799	F1MAA3;Q499R1		LOC100909464;Ppp2r5d	0	0	0.34	0.12	0.29	0.34	14
4810	Q6LDG5;P27605	Hypoxanthine-guanine phosphoribosyltransferase	Hprt1	0	-0.21	-0.1	0	0.23	0.28	22		3852	F7F3I7;A0A1B0GWL6;A0A1B0GWV9			0	0.37	0.67	0	0.51	0.73	14
4811	P27615	Lysosome membrane protein 2	Scarb2	-0.18	0	0	0	0	0	13		3861	Q8CHN5;F7FJQ3		Npc2	0	0	0.4	0	0	0.49	14
4815	P28480;A0A096MJA0	T-complex protein 1 subunit alpha	Tcp1	0	-0.19	-0.07	0	0.12	0.26	15		4070	G3V845;P10686	Phosphoinositide phospholipase C;1-phosphatidylinositol 4,5-bisphosphate phosphodiesterase gamma-1	Plcg1	0	0	0.42	0	0	0.28	14
7090	Q9QYF3	Unconventional myosin-Va	Myo5a	-0.5	-0.41	0	0	0	0	27		4093	G3V8D6;O70277	Tripartite motif-containing protein 3	Trim3	0	0.32	0.44	0.16	0.39	0.41	14
6326	Q642E5;Q62967;Q99PJ4;Q71V32	Diphosphomevalonate decarboxylase	Mvd;Mvpd	0	0	0	0.23	0.37	0.41	17		4171	G3V997;Q9ESI7	Neuronal migration protein doublecortin	Dcx	0	0.32	0.45	0	0	0.48	14
4824	P29418;M0R601	ATP synthase subunit epsilon, mitochondrial	Atp5e;LOC100361879	0	0	-0.17	0	0	0	28		4419	O35244	Peroxiredoxin-6	Prdx6	0	0.31	0.41	0.14	0.24	0.3	14
4825	P29419	ATP synthase subunit e, mitochondrial	Atp5i	0	0	-0.12	0	0	0	28		4559	P05197;Q8K1G4	Elongation factor 2	Eef2	-0.12	0.27	0.84	0	0	0.58	14
4827	P29534;A0A0G2K127	Vascular cell adhesion protein 1	Vcam1	-0.42	0	0	0	0	0	13		4650	Q6P7A4;P10960;F7EPE0	Sulfated glycoprotein 1	Psap	0.22	0.17	0.26	0.06	0.19	0.36	14
739	A0A0G2K5E7;G3V888;G3V9G4;P16638;P16638-2	ATP-citrate synthase	Acly	-0.15	-0.34	-0.13	0	0.16	0.2	24		4654	P11275;F1LZG4;A0A0G2JUV8;Q924T0	Calcium/calmodulin-dependent protein kinase type II subunit alpha	Camk2a	0	0.25	0.53	0.12	0.3	0.3	14
6846	Q810W7-2;Q810W7	Microtubule-associated serine/threonine-protein kinase 1	Mast1	-0.36	-0.6	-0.4	0	0	0	18		4849	P32577	Tyrosine-protein kinase CSK	Csk	0	0	0.25	0	0	0.47	14
4833	P31044	Phosphatidylethanolamine-binding protein 1;Hippocampal cholinergic neurostimulating peptide	Pebp1	0	-0.13	-0.09	0.08	0	0.12	29		4879	P36972	Adenine phosphoribosyltransferase	Aprt	0	0	0.27	0	0.13	0.31	14
1908	D3ZAA9;O88953		Mpp2	-0.5	-0.65	-0.39	0	0	0	18		5066	P62630;M0R757;F1M6C2	Elongation factor 1-alpha 1;Elongation factor 1-alpha	Eef1a1;LOC100360413;LOC100360150	0	0	0.28	0	0	0.52	14
4837	P31422;A0A0G2JV93	Metabotropic glutamate receptor 3	Grm3	0	0	-0.41	0	0	0	14		5080	P62828;Q8K586;Q66H11	GTP-binding nuclear protein Ran;GTP-binding nuclear protein Ran, testis-specific isoform	Ran;Rasl2-9;RGD1306195	0	0	0.23	0	0.07	0.36	14
5140	Q68G11;P67874;N0E4B7;A0A0G2KA61;A0A096MJD3;A0A096MKB7;N0E631	Casein kinase II subunit beta	Csnk2b;Csnk2b-Ly6g5b	0	-0.24	0	0	0	0	29		5151	P69897	Tubulin beta-5 chain	Tubb5	0	0	0.51	0.13	0.15	0.3	14
4840	P31662	Sodium-dependent neutral amino acid transporter SLC6A17	Slc6a17	0	0.23	0	0	0.17	0	12		5248	Q01460	Di-N-acetylchitobiase	Ctbs	0	0	0.5	0	0	0.51	14
4842	P32089	Tricarboxylate transport protein, mitochondrial	Slc25a1	0	-0.07	0	0	0	0	25		5307	Q0D2L6;B2RZ38		Rragc;Rragd	0	0	0.37	0	0	0.42	14
4848	P32551	Cytochrome b-c1 complex subunit 2, mitochondrial	Uqcrc2	-0.31	0	0	0	0	0	13		535	A0A0G2K0X9;G3V699;Q9Z2Q1;Q9Z2Q1-2	Protein transport protein Sec31A	Sec31a	0	0	0.26	0	0	0.43	14
4849	P32577	Tyrosine-protein kinase CSK	Csk	0	0	0	0.21	0	0.37	1		5573	Q4V7C6;A0A0G2K2C2;A0A096MJ75;A0A096MJK6	GMP synthase [glutamine-hydrolyzing]	Gmps	0	0	0.38	0	0	0.39	14
1230	A8C4G9;A0A0G2K9F7;K0J5S5;Q5XI91		Zmynd8;spikar	-0.5	0	0	0	0	0	26		5620	Q4V8K5	BRO1 domain-containing protein BROX	Brox	0	0	0.24	0	0	0.43	14
4530	P00388	NADPH--cytochrome P450 reductase	Por	-0.18	-0.15	-0.13	0.12	0.25	0.33	16		5661	Q568Z9	Phytanoyl-CoA hydroxylase-interacting protein	Phyhip	0	0.39	0.41	0	0	0.34	14
4855	P35213-2;P35213	14-3-3 protein beta/alpha;14-3-3 protein beta/alpha, N-terminally processed	Ywhab	-0.33	-0.5	-0.11	0	0.08	0.19	9		5755	Q5FVJ0;Q5FVJ0-2;A0A0G2K6A9	Protein RUFY3	Rufy3	0	0.07	0.33	0.05	0.1	0.36	14
4857	P35284;A0A0G2JYB0;D4A376	Ras-related protein Rab-12	Rab12	-0.3	-0.25	-0.12	0	0.11	0.23	37		5827	Q5M7T7		Pla2g7	0	0	0.52	0	0	0.62	14
486	Q5U2W0;A0A0G2K016		Sun1	-0.3	-0.44	0	0	0	0	6		5848	Q5M918;F7EQ81;Q32KJ5		Gns	0	0	0.37	0	0	0.52	14
4860	P35332;Q9QWR2	Hippocalcin-like protein 4	Hpcal4	-0.39	-0.59	-0.51	0.12	0	0	18		6167	Q62658	Peptidyl-prolyl cis-trans isomerase FKBP1A	Fkbp1a	0	0.19	0.46	0.09	0.37	0.4	14
4863	P35433	Amidophosphoribosyltransferase	Ppat	0	0	0	0	0.47	0	34		6187	Q62797;Q64641	Protein-tyrosine-phosphatase	Ptpro	0	0	0.5	0	0	0.6	14
166	A0A0G2JTD8;D4A6T9		Mark4	0	-0.24	0	0	0	0	29		6981	Q9EPB1	Dipeptidyl peptidase 2	Dpp7	0	0.16	0.44	0.15	0.15	0.41	14
5173	P81377;Q3SWU5;F1M9X5;Q5BJR2	cAMP-dependent protein kinase type I-beta regulatory subunit	Prkar1b;Cyp4f18	-0.3	0	0	0	0.51	0.48	16		6994	Q9EQS0	Transaldolase	Taldo1	0	0	0.35	0.12	0.12	0.27	14
6107	Q5XIF3	NADH dehydrogenase [ubiquinone] iron-sulfur protein 4, mitochondrial	Ndufs4	0	-0.24	0	0	0	0	29		7080	Q9QVC8	Peptidyl-prolyl cis-trans isomerase FKBP4;Peptidyl-prolyl cis-trans isomerase FKBP4, N-terminally processed	Fkbp4	0	0	0.38	0	0	0.32	14
4873	P35745;D4A1G1	Acylphosphatase-2;Acylphosphatase	Acyp2	0	-0.67	-0.35	0	0	0	33		711	G3V6K8;A0A0G2K4U4;P54283	Voltage-dependent L-type calcium channel subunit beta-1	Cacnb1	0	0.43	0.54	0	0.72	0.76	14
4875	P36201	Cysteine-rich protein 2	Crip2	0	0	-0.23	0	0	0	28		1101	F1LY19;A0A0U1RS25		Upf1	0	0	0	-0.2	-0.14	0.32	15
3185	D4ADF5		Pdcd5	0	-0.24	0	0	0	0	29		1874	D3Z941		Mars	0	0	0	-0.1	-0.18	0.23	15
4878	P36876	Serine/threonine-protein phosphatase 2A 55 kDa regulatory subunit B alpha isoform	Ppp2r2a	-0.23	-0.35	-0.2	0	0.15	0	9		2802	D4A2F1;F1LPF2;P25304-3;P25304-4;P25304-2;P25304-5;P25304-6;P25304	Agrin;Agrin N-terminal 110 kDa subunit;Agrin C-terminal 110 kDa subunit;Agrin C-terminal 90 kDa fragment;Agrin C-terminal 22 kDa fragment	Agrn	0	0	0.16	0	-0.27	0.39	15
6830	Q80W83		LOC100909468	0	0	0	0	0.46	0.58	11		2824	D4A3E1		Hnrnpll	0	-0.16	0	0	-0.12	0.33	15
4525	O88954;Q33DY7	MAGUK p55 subfamily member 3	Mpp3	-0.48	-0.67	-0.47	0	0	0	18		2995	D4A7R0	Signal recognition particle subunit SRP72	Srp72	0	0	0	0	-0.27	0.25	15
4882	P37397	Calponin-3	Cnn3	-0.18	0	0.29	-0.13	0	0	30		3343	M3ZCQ2;F1LNJ2;Q4KLH1	U5 small nuclear ribonucleoprotein 200 kDa helicase	Snrnp200	0	0	-0.06	0	-0.18	0.23	15
4885	P38718-2;P38718	Mitochondrial pyruvate carrier 2	Mpc2	0	0	-0.16	0	0	0	28		3444	F1LRI5;B5DFK9		Gcn1l1	0	0	0	0	-0.31	0.42	15
4886	P38983	40S ribosomal protein SA	Rpsa	0	0	0	0	0	0.19	32		3914	G3V6H2;Q4FZS3		Prpf8	0	0	0	0	-0.2	0.44	15
4887	P39069;A0A0G2K7Q6;M0RC66	Adenylate kinase isoenzyme 1	Ak1	0	-0.17	0	0.1	0	0.22	15		4927	P49088	Asparagine synthetase [glutamine-hydrolyzing]	Asns	0	0	0	0	-0.17	0.46	15
7074	Q9JMJ4	Pre-mRNA-processing factor 19	Prpf19	-0.31	0	0	0	0.36	0.45	16		5323	Q14TE9;Q63177	DNA topoisomerase 2	Top2b	0	-0.25	-0.24	0	-0.2	0.44	15
4890	P40329	Arginine--tRNA ligase, cytoplasmic	Rars	0	0	0	0	0	0.3	32		5683	Q5BJP4		Rbm39	0	0	0	0	-0.23	0.35	15
4895	P41542	General vesicular transport factor p115	Uso1	-0.15	-0.18	0	0	0	0.17	15		6260	Q6IMY8;Q63555;A0A0G2JZ52		Hnrnpu	-0.09	0	-0.08	0	-0.16	0.43	15
4896	P41562;Q0QER8;A0A1L1WKG3	Isocitrate dehydrogenase [NADP] cytoplasmic	Idh1	0	-0.23	-0.1	0.07	0.07	0	29		6309	Q641Y8;Q9JIJ7	ATP-dependent RNA helicase DDX1	Ddx1	0	-0.17	-0.08	0	-0.12	0.25	15
4897	P41777;A0JN19	Nucleolar and coiled-body phosphoprotein 1	Nolc1	0	0	-0.18	0.28	0.56	0	34		6517	Q6AYD3;Q6AYD3-2;A0A0G2JVS2	Proliferation-associated protein 2G4	Pa2g4	0	0	0	-0.16	-0.35	0.28	15
4898	P42123	L-lactate dehydrogenase B chain	Ldhb	-0.21	-0.34	0	0	0	0.08	6		6643	Q6P3V8		Eif4a1	0	0	0.22	0	-0.21	0.45	15
4899	P42260;F1M855	Glutamate receptor ionotropic, kainate 2	Grik2	0	-0.71	-0.49	0	0	0	2		6998	Q9ER24	Ataxin-10	Atxn10	0	-0.09	0	0	-0.41	0.37	15
4900	P42346;A0A0G2JX74	Serine/threonine-protein kinase mTOR	Mtor	0	-0.17	0	0	0.17	0.27	15		101	A0A0G2JSH2;P29147	D-beta-hydroxybutyrate dehydrogenase, mitochondrial	Bdh1	0	-0.21	-0.32	0	0	-0.18	16
4901	Q6P9X2;P42667	Signal peptidase complex catalytic subunit SEC11;Signal peptidase complex catalytic subunit SEC11A	Sec11a	0	0	0	0	0	0.27	32		9	A0A096MIZ1;D4A4D8;A0A096MJ96;A0A096MK80		Palm2	0	-0.37	-0.6	0	0	0	26
4905	P45479	Palmitoyl-protein thioesterase 1	Ppt1	0	0	0	0	0	0.31	1		1040	A0A0H2UHM5;P11598	Protein disulfide-isomerase A3	Pdia3	0	-0.19	-0.16	-0.11	0	0	16
5098	P62963	Profilin-1	Pfn1	0	-0.33	-0.19	0	0	0.22	24		115	A0A0G2JSK5;P49134	Integrin beta-1	Itgb1	0	-0.15	-0.26	0	-0.08	0	16
4908	P46462	Transitional endoplasmic reticulum ATPase	Vcp	0	-0.12	0	0	0.05	0.15	32		3646	F1M2K6		Pkp4	0	-0.43	-0.6	0	0	0	26
4922	P47971;A0A0H2UHC1	Neuronal pentraxin-1	Nptx1	-0.82	-0.51	-0.61	0	0	0	23		4907	P46413	Glutathione synthetase	Gss	0	-0.29	-0.55	0	0	0	26
4911	P47196	RAC-alpha serine/threonine-protein kinase	Akt1	0	0	0	0	0	0.63	5		4945	P51146	Ras-related protein Rab-4B	Rab4b	0	-0.45	-0.54	0	0	0	26
4912	P47727;M0R3X6;A0A0G2JSV2;A0A0G2K658;A0A096MJ24;O08559;Q9QZI6;Q9QZI5	Carbonyl reductase [NADPH] 1	Cbr1	0	0	-0.11	0	0	0.19	32		1283	B0BN74;F1LQH9		Bag2	0	-0.45	-0.53	0	0	0	26
4913	P47728	Calretinin	Calb2	0	0	0	0	0	-0.2	25		6222	Q63128;Q6PLD8		cpg2;Cpg2b	0	-0.6	-0.52	0	0	0	26
4915	P47819	Glial fibrillary acidic protein	Gfap	0	0	0.53	0	0	0	30		1498	B2GVB4;Q9QZR6;Q9QZR6-2;Q9QZR6-3;Q9QZR6-4;F1LN75	Septin-9	Sept9	0	-0.22	-0.26	0.09	0	0	16
5108	P63031	Mitochondrial pyruvate carrier 1	Mpc1	-0.33	0	-0.2	0	0	0	8		219	A0A0G2JUG7			0	-0.24	-0.52	0	0	0	26
4920	P47875	Cysteine and glycine-rich protein 1	Csrp1	0	0	0.52	0	0	0	30		3075	D4AA13		Dmxl1	0	-0.3	-0.51	0	0	0	26
1086	A0A0H4SN51;A0A0H4SRI2;Q9EQG6-2;A0A0H4SRI7;D4ABK9;A0A0H4SQ65;D3ZWB2;A0A0H4T4D0;A0A0H4SMZ8;Q9EQG6	Kinase D-interacting substrate of 220 kDa	Kidins220	-0.36	-0.22	-0.14	0	0	0	20		2919	D4A5L9;P62898;CON__P62894;P10715	Cytochrome c, somatic;Cytochrome c, testis-specific	LOC679794;Cycs;Cyct	0	-0.26	-0.51	0	0	0	26
4759	P19969	Gamma-aminobutyric acid receptor subunit alpha-5	Gabra5	-0.41	-1	-0.59	0	0.21	0	23		6925	Q91ZN1	Coronin-1A	Coro1a	0	-0.41	-0.5	0	0	0	26
4927	P49088	Asparagine synthetase [glutamine-hydrolyzing]	Asns	0	0	0	0	0	0.49	1		7187	Q9Z2Z8	7-dehydrocholesterol reductase	Dhcr7	0	-0.52	-0.5	0	0	0	26
1874	D3Z941		Mars	0	0	0	0	0.14	0.42	17		4571	P06685;Q64608	Sodium/potassium-transporting ATPase subunit alpha-1	Atp1a1	-0.27	-0.44	-0.47	0	0	0	26
4930	P49187;A0A0U1RRS7;B0VXR6;A0A0U1RVI2	Mitogen-activated protein kinase 10;Mitogen-activated protein kinase	Mapk10	-0.39	0	0	0	0	0	13		3354	F1LNZ5;P20236	Gamma-aminobutyric acid receptor subunit alpha-3	Gabra3	0	-0.55	-0.5	0	0	0	26
4931	P49242;M0R6L4	40S ribosomal protein S3a;40S ribosomal protein S3b	Rps3a;LOC100365839	0	0	0	0	0	0.34	1		5784	Q5GFD9	Protein IMPACT	Impact	0	-0.49	-0.5	0	0	0	26
1350	B0K020	CDGSH iron-sulfur domain-containing protein 1	Cisd1	-0.25	-0.16	-0.27	0	0	0	20		2111	D3ZGE6;Q66HL2;A0A0G2JZ13;A0A1B0GWS4;O70420;O70419	Src substrate cortactin	Cttn	0	-0.2	-0.27	0	0	-0.2	16
7040	Q9JJ19	Na(+)/H(+) exchange regulatory cofactor NHE-RF1	Slc9a3r1	0	-0.24	0	0	0	0	29		1769	B5DFK5;F1LML7;Q99PW9		Hip1r	0	-0.53	-0.49	0	0	0	26
4938	P50398	Rab GDP dissociation inhibitor alpha	Gdi1	-0.17	-0.28	0	0	0	0	6		1795	C6JUM5		Pcdhgc5	0	-0.55	-0.49	0	0	0	26
4939	P50399	Rab GDP dissociation inhibitor beta	Gdi2	-0.22	0	0	0	0	0	13		1892	D3Z9L0		Agk	0	-0.38	-0.48	0	0	0	26
4940	P50408;B2GUW7	V-type proton ATPase subunit F	Atp6v1f;LOC501979	0	0	-0.23	0	0	0.11	28		1582	B2RYW9	Fumarylacetoacetate hydrolase domain-containing protein 2	Fahd2	0	-0.23	-0.47	0	0	0	16
4942	P50475	Alanine--tRNA ligase, cytoplasmic	Aars	-0.17	0	0	0	0.23	0.34	17		2370	D3ZQD3		Ogdhl	0	-0.27	-0.47	0	0	0	26
4944	P50554	4-aminobutyrate aminotransferase, mitochondrial;4-aminobutyrate aminotransferase, brain isoform;4-aminobutyrate aminotransferase, liver isoform	Abat	0	-0.15	0	0	0.05	0	29		4094	G3V8E2;Q4FZS7		Strip1	0	-0.41	-0.47	0	0	0	26
4945	P51146	Ras-related protein Rab-4B	Rab4b	-0.23	0	0	0	0	0	13		2944	D4A6H8		Ctnna2	0	-0.16	-0.24	0	0.07	0	16
4952	P51635	Alcohol dehydrogenase [NADP(+)]	Akr1a1	0	0	0	0.1	0.08	0.15	32		2240	Q9ERS3;D3ZKP9;Q8CFG7;A0A0G2K7E5;Q8VHS9;P54290;A0A0G2K8L7	Voltage-dependent calcium channel subunit alpha-2/delta-1;Voltage-dependent calcium channel subunit alpha-2-1;Voltage-dependent calcium channel subunit delta-1	Cacna2d1	0	-0.47	-0.46	0	0	0	26
4957	P51907	Excitatory amino acid transporter 3	Slc1a1	-0.43	-0.36	0	0	0	0	6		6175	Q62717	Calcium-dependent secretion activator 1	Cadps	0	-0.49	-0.46	0	0	0	26
4958	P52020;Q8CJ80	Squalene monooxygenase	Sqle	0	-0.35	0	0	0.38	0	34		3273	E9PTR4;A0A0G2JYC6;Q4V8A7		Ubap2l	0	-0.23	-0.13	0	-0.13	0	16
178	A0A0G2JTL5;P52873	Pyruvate carboxylase, mitochondrial	Pc	-0.16	-0.1	-0.21	0	0	0	20		4809	P27274	CD59 glycoprotein	Cd59	0	-0.43	-0.46	0	0	0	26
4961	P52555	Endoplasmic reticulum resident protein 29	Erp29	0	0	-0.12	0	0	0	28		3508	F1LTW9		Efr3b	0	-0.39	-0.46	0	0	0	26
4966	Q68G16;P53042;Q64538;Q80UF5	Serine/threonine-protein phosphatase;Serine/threonine-protein phosphatase 5	Ppp5c	0	0	0	0	0	0.17	32		4525	O88954;Q33DY7	MAGUK p55 subfamily member 3	Mpp3	0	-0.65	-0.46	0	0	0	26
4969	Q6IRG9;P53676	AP-3 complex subunit mu-1	Ap3m1	0	-0.08	0	0	0	0.14	32		3380	F1LPK7;Q63598;Q562B2	Plastin-3	Pls3	0	-0.27	-0.46	0	0	0	26
152	A0A0G2JT30;Q5U2R0	Methionine adenosyltransferase 2 subunit beta	Mat2b	0	0	0	0	0.26	0.38	17		3550	F1LW74		Iqgap2	0	-0.3	-0.17	0	0	0.15	16
2962	D4A719;A0A096MKE2;A0A096MKG7		Snx12	0	-0.24	0	0	0	0	29		4729	P18163	Long-chain-fatty-acid--CoA ligase 1	Acsl1	0	-0.43	-0.45	0	0	0	26
4974	P54287	Voltage-dependent L-type calcium channel subunit beta-3	Cacnb3	0	-0.46	-0.33	0	0	0	33		3989	Q9Z1X8;G3V774		Fbxo2	0	-0.26	-0.45	0	0	0	26
4975	P54311	Guanine nucleotide-binding protein G(I)/G(S)/G(T) subunit beta-1	Gnb1	0	-0.29	-0.16	0	0	0	4		1485	B2GV74		Klc2	0	-0.51	-0.45	0	0	0	26
2091	D3ZFQ8		Cyc1	-0.18	-0.16	-0.23	0	0	0	20		5255	Q02563	Synaptic vesicle glycoprotein 2A	Sv2a	0	-0.33	-0.44	0	0	0	26
4977	P54319	Phospholipase A-2-activating protein	Plaa	0	-0.16	0	0	0.1	0.17	15		3739	F1M853		Rrbp1	0	-0.22	-0.25	0	-0.13	0	16
5573	Q4V7C6;A0A0G2K2C2;A0A096MJ75;A0A096MJK6	GMP synthase [glutamine-hydrolyzing]	Gmps	0	0	-0.17	0.12	0.27	0.4	17		3433	F1LR60;O35430-2;O35430	Amyloid beta A4 precursor protein-binding family A member 1	Apba1	0	-0.4	-0.43	0	0	0	26
4984	Q62861;P54900	Sodium channel subunit beta-2	Scn2b	-0.43	-0.52	-0.34	0	0.21	0	18		3083	D4AAE9		Cisd2	0	-0.39	-0.43	0	0	0	26
4985	P54921	Alpha-soluble NSF attachment protein	Napa	-0.5	-0.3	-0.17	0	0.17	0.29	37		3907	G3V6D3;P10719;Q0QEP3	ATP synthase subunit beta;ATP synthase subunit beta, mitochondrial	Atp5b	0	-0.16	-0.17	0	0	-0.08	16
4986	P55051	Fatty acid-binding protein, brain	Fabp7	0	0	0.18	0	0	0	25		5957	Q5RKI5		Flii	0	-0.43	-0.43	0	0	0	26
4989	P55161;F1LSM5;Q32PY0;Q562B3	Nck-associated protein 1	Nckap1	-0.33	-0.46	-0.32	0	0.07	0.12	9		6852	Q812E9;Q812E9-2;A0A1B0GWN8	Neuronal membrane glycoprotein M6-a	Gpm6a	0	-0.38	-0.43	0	0	0	26
4991	P55770;H7C5X3	NHP2-like protein 1;NHP2-like protein 1, N-terminally processed	Nhp2l1;RGD1566078	0	0	0	0	0.13	0.18	32		3982	G3V741;Q6IRH6;P16036	Phosphate carrier protein, mitochondrial	Slc25a3	0	-0.28	-0.26	0	0	-0.13	16
3328	F1LN46;Q3KR63	Carnitine O-palmitoyltransferase 1, brain isoform	Cpt1c	-0.3	0	-0.27	0	0	0	8		7005	Q9ES21	Phosphatidylinositide phosphatase SAC1	Sacm1l	0	-0.48	-0.43	0	0	0	26
501	A0A0G2K0E5;O88881-2;O88881	Brain-enriched guanylate kinase-associated protein	Begain	0	0	0	0	0.33	0	34		4232	M0R402		Tmx3	0	-0.42	-0.43	0	0	0	26
5011	P60123	RuvB-like 1	Ruvbl1	0	0	0	0	0	0.34	1		4381	M0RDU0		F8a1	0	-0.31	-0.42	0	0	0	26
1241	A9UMV7		Uqcr11	0	-0.24	0	0	0	0	29		816	D3ZCI0;A0A0G2KA23;A0A0G2K785;Q63060	Glycerol kinase	Gk	0	-0.26	-0.42	0	0	0	16
5015	P60522;F1M1J6	Gamma-aminobutyric acid receptor-associated protein-like 2	Gabarapl2;RGD1562165	-0.24	-0.36	-0.11	0	0	0	6		152	A0A0G2JT30;Q5U2R0	Methionine adenosyltransferase 2 subunit beta	Mat2b	0	-0.5	-0.42	0	0	0	26
5018	P60711	Actin, cytoplasmic 1;Actin, cytoplasmic 1, N-terminally processed	Actb	-0.25	0	0	0	0	0	13		4309	M0R8V0		LOC100910056	0	-0.49	-0.41	0	0	0	26
5019	Q6NT88;P60825	Cold-inducible RNA-binding protein	Cirbp	-0.36	-0.16	0	0	0	0	6		4052	Q6P7A8;G3V7X5;P24054	SPARC-like protein 1	Sparcl1	0	-0.36	-0.41	0	0	0	26
2528	D3ZUY8		Ap2a1	-0.23	-0.22	-0.15	0	0	0	20		47	A0A1W2Q6E9;A0A096MK30;O35763	Moesin	Msn	0	-0.33	-0.4	0	0	0	26
268	A0A0G2JVH4;A0A140TAG5;Q3KR86	MICOS complex subunit Mic60	Immt	-0.25	-0.18	-0.15	0	0	0	20		4532	P00507	Aspartate aminotransferase, mitochondrial	Got2	0	-0.33	-0.35	0	0	-0.18	16
1712	B5DF01;D3ZTB4		Vps11	0	-0.24	0	0	0	0	29		4551	P04636;Q0QF43	Malate dehydrogenase, mitochondrial;Malate dehydrogenase	Mdh2	0	-0.16	-0.19	0	0	-0.15	16
4446	O35821	Myb-binding protein 1A	Mybbp1a	0	0	0	0	0.38	0.52	11		4555	P04785	Protein disulfide-isomerase	P4hb	0	-0.22	-0.24	0	-0.09	0	16
5026	P61023	Calcineurin B homologous protein 1	Chp1	0	0	0	0	0.23	0	10		4563	P05708	Hexokinase-1	Hk1	0	-0.17	-0.2	0	0.08	0	16
5031	P61227	Ras-related protein Rap-2b	Rap2b	0	0	-0.33	0	0	0	14		4600	P08461	Dihydrolipoyllysine-residue acetyltransferase component of pyruvate dehydrogenase complex, mitochondrial	Dlat	0	-0.3	-0.33	0.04	0.05	0	16
2848	D4A3V2	NADH dehydrogenase [ubiquinone] 1 alpha subcomplex subunit 6	Ndufa6	-0.35	-0.26	-0.24	0	0	0	20		6139	Q5XIP0		Dnajb4	-0.27	-0.54	-0.44	0	0	0	26
5036	P61589;O35791	Transforming protein RhoA	Rhoa	0	0	-0.15	0	0	0	28		3594	F1LYZ8		Ppp1r21	0	-0.29	-0.4	0	0	0	16
841	A0A0G2K7S6;F1LSM3;Q9R037;A0A0G2JX77	WD repeat-containing protein 44	Wdr44	0	-0.24	0	0	0	0	29		4670	P12007	Isovaleryl-CoA dehydrogenase, mitochondrial	Ivd	0	-0.16	-0.29	0	-0.07	-0.13	16
5043	P61972	Nuclear transport factor 2	Nutf2	0	0	0	0	0.09	0	25		1968	D3ZC56		Dst	-0.08	-0.23	-0.32	0	0	0	16
5044	P61983	14-3-3 protein gamma;14-3-3 protein gamma, N-terminally processed	Ywhag	-0.36	-0.33	0	0	0	0	6		4690	P13803	Electron transfer flavoprotein subunit alpha, mitochondrial	Etfa	0	-0.15	-0.2	0	0	-0.1	16
5045	P62024;F1LNB2	Phosphatase and actin regulator 1;Phosphatase and actin regulator	Phactr1	-0.43	0	0	0	0	0	13		4714	P15999;F1LP05	ATP synthase subunit alpha, mitochondrial;ATP synthase subunit alpha	Atp5a1	0	-0.22	-0.22	0	0	-0.11	16
5047	P62076	Mitochondrial import inner membrane translocase subunit Tim13	Timm13	-0.28	-0.12	0	0	0	0	13		3943	G3V6Q9;Q925T8	BMP/retinoic acid-inducible neural-specific protein 1	Brinp1	0	-0.43	-0.39	0	0	0	26
5048	P62078	Mitochondrial import inner membrane translocase subunit Tim8 B	Timm8b	-0.34	0	0	0	0	0	13		4732	P18418	Calreticulin	Calr	0	-0.15	-0.15	-0.11	-0.12	-0.15	16
3348	F1LNP8;A0A1L1WKJ6;Q9WTY6		Pvrl1	-0.23	-0.26	-0.09	0	0	0	20		1640	B3SVE9;Q64232	Very-long-chain enoyl-CoA reductase	Tecr	0	-0.36	-0.39	0	0	0	26
1005	A0A0G2QC21;A3KMH4		Arhgef7	0	-0.23	0	0	0	0	29		4805	P26772;P97601;A0A0G2JTG1	10 kDa heat shock protein, mitochondrial	Hspe1	0	-0.17	-0.2	0	0	-0.18	16
2050	D3ZEJ9		RGD1310429	0	-0.23	0	0	0	0	29		4836	P31399	ATP synthase subunit d, mitochondrial	Atp5h	0	-0.2	-0.24	0	0	-0.07	16
3914	G3V6H2;Q4FZS3		Prpf8	-0.3	-0.17	0	0.22	0.51	0.53	16		5210	P97546;P97546-3;P97546-1	Neuroplastin	Nptn	0	-0.28	-0.38	0	0	0	16
3323	F1LMZ8	26S proteasome non-ATPase regulatory subunit 11	Psmd11	0	0	0	0	0	0.33	1		4460	O54861	Sortilin	Sort1	0	-0.27	-0.38	0	0	0	16
5056	P62260	14-3-3 protein epsilon	Ywhae	-0.26	-0.36	-0.22	0	0	0.09	9		7173	Q9Z269	Vesicle-associated membrane protein-associated protein B	Vapb	0	-0.26	-0.38	0	0	0	16
5057	P62268;D4A9Q3	40S ribosomal protein S23	Rps23;RGD1563570	0	0	0	0	0	0.51	1		4895	P41542	General vesicular transport factor p115	Uso1	0	-0.31	-0.3	-0.06	0	0	16
5059	P62282;Q6PDV9;D3ZYK5	40S ribosomal protein S11	Rps11;RGD1563352	0	0	0	0	0	0.25	32		4961	P52555	Endoplasmic reticulum resident protein 29	Erp29	0	-0.16	-0.16	-0.11	-0.12	0	16
5467	Q498U4	SAP domain-containing ribonucleoprotein	Sarnp	0	-0.23	0	0	0	0	29		1424	B1WC33		Cdc42ep4	0	-0.3	-0.37	0	0	0	16
2763	D4A1G8		Cep170b	-0.49	-0.35	0	0	0	0	27		967	D3Z899;A0A0G2KAE6		Fam73b	0	-0.29	-0.37	0	0	0	16
5065	P62628	Dynein light chain roadblock-type 1	Dynlrb1	0	-0.22	0	0	0.26	0	10		4149	G3V912;Q52KK2		Tmx4	0	-0.72	-0.37	0	0	0	26
3620	F1M0U5		Nbas	0	0	0	0	0.25	0.3	17		81	A0A0A0MY00;P70584	Short/branched chain specific acyl-CoA dehydrogenase, mitochondrial	Acadsb	0	-0.24	-0.36	0	0	0	16
497	A0A0G2K0B4;A0A0G2K8P3;Q62940	E3 ubiquitin-protein ligase NEDD4	Nedd4	0	0	0	0	0.44	0.46	11		5278	Q6P9Y4;Q05962	ADP/ATP translocase 1	Slc25a4	0	-0.31	-0.35	0	0	-0.09	16
5070	P62718;F1M0K6	60S ribosomal protein L18a	Rpl18a;RGD1565566	0	0	0	0.13	0	0.35	1		6098	Q5XID1	Anamorsin	Ciapin1	0	-0.48	-0.36	0	0	0	26
5071	P62744	AP-2 complex subunit sigma	Ap2s1	0	-0.39	-0.2	0	0	0	4		6174	Q62703	Reticulocalbin-2	Rcn2	0	-0.24	-0.36	0	0	0	16
5072	P62747	Rho-related GTP-binding protein RhoB	Rhob	0	0	-0.12	0	0	0	28		5301	Q09073	ADP/ATP translocase 2;ADP/ATP translocase 2, N-terminally processed	Slc25a5	0	-0.3	-0.36	0	0	0	16
1747	B5DFC3;A0A0G2JZM2		Sec23a	0	-0.23	0	0	0	0	29		5736	Q5EB77	Ras-related protein Rab-18	Rab18	-0.18	-0.36	-0.3	-0.13	0	0	16
3396	F1LQ48;B5DFG2;F2Z3R2;F1LQ48-2;Q9ET33		Hnrnpl	-0.18	-0.13	-0.15	0	0	0	20		4046	G3V7V3;Q5BJL7		Slc27a4	0	-0.56	-0.36	0	0	0	26
5075	P62775	Myotrophin	Mtpn	0	-0.4	-0.26	0	0.24	0	4		5853	Q5M960;Q62813;Q62813-2;A0A0H2UHY3;A0A0H2UHW7	Limbic system-associated membrane protein	Lsamp	0	-0.37	-0.22	0.1	0	0	16
5076	P62804	Histone H4;Osteogenic growth peptide	Hist1h4b	-0.27	0	0	0	0	0	13		5153	P70470	Acyl-protein thioesterase 1	Lypla1	0	-0.38	-0.35	0	0	0	26
5078	P62815	V-type proton ATPase subunit B, brain isoform	Atp6v1b2	-0.14	-0.3	-0.19	0	0	0.06	20		5929	Q5RJR8;A0A0G2K6J3	Leucine-rich repeat-containing protein 59	Lrrc59	-0.21	-0.17	-0.2	0	-0.08	0	16
3459	F1LRU1;Q9JIL3-2;A0A0G2K2T6;A0A0G2K4U6;Q9JIL3	Interleukin enhancer-binding factor 3	Ilf3	-0.25	-0.22	-0.13	0	0	0	20		4885	P38718-2;P38718	Mitochondrial pyruvate carrier 2	Mpc2	0	-0.27	-0.35	0	0	0	16
5519	Q4KLK7;Q5RJN5		Nop56	0	0	0	0	0.3	0.32	17		6033	Q5U3Z7	Serine hydroxymethyltransferase	Shmt2	-0.21	-0.28	-0.21	0	0	-0.06	16
5081	P62832	60S ribosomal protein L23	Rpl23	0	0	0	0	0	0.27	32		2868	D4A4H5		Sdf2	0	-0.26	-0.35	0	0	0	16
5086	P62870;A0A140TA99;F1LZ51;F1M937;A0JN07;M0R6V0;D3ZYC5	Transcription elongation factor B polypeptide 2	Tceb2;RGD1565653;LOC684822	0	0	0	0	0.26	0	10		3566	F1LX07;A0A0G2K2J7		Slc25a12	0	-0.28	-0.35	0	0	0	16
5087	P62890;A0A0G2K5E6	60S ribosomal protein L30	Rpl30	0	0	0	0	0	0.23	32		4607	P09117;A0A0G2K3Q6;Q6PCU3;A0A0G2QC57	Fructose-bisphosphate aldolase C;Fructose-bisphosphate aldolase	Aldoc	0	-0.16	-0.34	0	0	0	16
5088	P62907;Q4KM60;D3Z9F6	60S ribosomal protein L10a;Ribosomal protein	Rpl10a;RGD1562962	0	0	0	0	0	0.2	32		36	A0A096MJW2;A0A0H2UHL1;Q66H50;A0A096MJJ7	Fatty acyl-CoA reductase 1	Far1	0	-0.77	-0.34	0	0	0	26
5089	P62909	40S ribosomal protein S3	Rps3	0	0	0	0	0.1	0.35	1		4685	P13264;A0A0G2K1T0	Glutaminase kidney isoform, mitochondrial;Glutaminase kidney isoform 68 kDa chain;Glutaminase kidney isoform 65 kDa chain	Gls	0	-0.19	-0.34	0	0	0	16
5090	P62912;D4A412;D4A647	60S ribosomal protein L32	Rpl32;LOC688684;Gm21893	0	0	0	0	0	0.3	32		4297	M0R830;Q6P5P5	Mesoderm-specific transcript homolog protein	Mest	0	-0.36	-0.34	0	0	0	26
5091	P62914;Q4V8I6;A0A0G2K3Y8	60S ribosomal protein L11	Rpl11	0	0	0	0	0	0.26	32		6431	Q68FX0;Q99NA6	Isocitrate dehydrogenase [NAD] subunit beta, mitochondrial	Idh3B	0	-0.22	-0.3	0	0	-0.11	16
5093	P62919;D4A6W6	60S ribosomal protein L8	Rpl8;RGD1561333	0	0	0	0	0	0.24	32		2972	D4A772		Dtna	0	-0.45	-0.33	0	0	0	26
3907	G3V6D3;P10719;Q0QEP3	ATP synthase subunit beta;ATP synthase subunit beta, mitochondrial	Atp5b	-0.21	-0.17	-0.14	0	0	0	20		3316	F1LMU7;F1LNE8;P23576	Gamma-aminobutyric acid receptor subunit alpha-2	Gabra2	0	-0.29	-0.33	0	0	0	16
5096	P62959;D4A269	Histidine triad nucleotide-binding protein 1	Hint1	0	-0.23	0	0.15	0	0	29		4747_m	P19492;P19492-2;G3V6Z5;G3V8Y9	Glutamate receptor 3	Gria3	-0.28	-0.39	-0.45	0	0	0	26
433	A0A0G2JZ60			0	-0.32	-0.26	0	0	0.18	24		7040	Q9JJ19	Na(+)/H(+) exchange regulatory cofactor NHE-RF1	Slc9a3r1	0	-0.3	-0.33	0	0	0	16
5100	Q6PED0;P62982;D4A0J6;F1LU69;Q63654;Q6P7R7;Q5FWT0;F1LML2;P62986;P0CG51;Q63429	Ubiquitin-40S ribosomal protein S27a;Ubiquitin;40S ribosomal protein S27a;Ubiquitin-60S ribosomal protein L40;60S ribosomal protein L40;Polyubiquitin-B;Polyubiquitin-C;Ubiquitin-related	Rps27a;LOC688462;Rps27l3;Ubb;Uba52;LOC100360548;Ubc	0	0	0	0.14	0	0	25		6862	Q8CGU4;A0A0G2JVS4	Arf-GAP with GTPase, ANK repeat and PH domain-containing protein 2	Agap2	0	-0.29	-0.2	0	0.1	0	16
5101	P62994;P62994-2;P62994-3;Q63058	Growth factor receptor-bound protein 2	Grb2	0	0	-0.2	0.1	0.28	0	10		774	A0A0G2K6G2;Q7TP48;Q7TP48-2;D3ZGQ3;Q5EB60	Adipocyte plasma membrane-associated protein	Apmap	0	-0.25	-0.32	0	0	0	16
6159	Q62599;F1LQS1;A0A140TA98;Q62599-2	Metastasis-associated protein MTA1	Mta1	-0.43	0	0	0	0.46	0	19		6933	Q920L2;Q0QF18	Succinate dehydrogenase [ubiquinone] flavoprotein subunit, mitochondrial	Sdha	0	-0.15	-0.18	0	0	-0.17	16
5103	P63004	Platelet-activating factor acetylhydrolase IB subunit alpha	Pafah1b1	-0.45	-0.35	-0.17	0	0.22	0.27	37		6966	Q99NA5;F1LNF7	Isocitrate dehydrogenase [NAD] subunit alpha, mitochondrial;Isocitrate dehydrogenase [NAD] subunit, mitochondrial	Idh3a	0	-0.16	-0.21	0	0.06	-0.09	16
5104	P63012	Ras-related protein Rab-3A	Rab3a	-0.35	-0.43	-0.24	0	0.07	0	9		7000	Q9ER34	Aconitate hydratase, mitochondrial	Aco2	0	-0.17	-0.25	0	0	-0.18	16
5105	P63018;M0RCB1;D4A4S3;M0R8M9;F1LZI1	Heat shock cognate 71 kDa protein	Hspa8;LOC102549957;LOC680121	-0.18	-0.2	-0.11	0	0.11	0.22	37		3838	F7EN52;A0A0G2JWG7		Cyp46a1	0	-0.23	-0.32	0	0	0	16
5107	P63029;F1LYR7	Translationally-controlled tumor protein	Tpt1	0	-0.11	-0.12	0.13	0.24	0	10		5876	Q5PPH0	Enolase-phosphatase E1	Enoph1	0	-0.5	-0.32	0	0	0	26
4547	P04182	Ornithine aminotransferase, mitochondrial	Oat	-0.3	0	-0.19	0	0	0	8		4647	P10824	Guanine nucleotide-binding protein G(i) subunit alpha-1	Gnai1	0	-0.37	-0.32	0	0	0	16
5109	P63036	DnaJ homolog subfamily A member 1	Dnaja1	-0.26	0	0	0	0.38	0.6	11		4860	P35332;Q9QWR2	Hippocalcin-like protein 4	Hpcal4	-0.19	-0.47	-0.46	0	0	0	26
5110	P63039	60 kDa heat shock protein, mitochondrial	Hspd1	0	-0.11	-0.13	0	0	0	28		4211	G3V9Z3;B2GV33;P21396	Amine oxidase [flavin-containing] A	Maoa	0	-0.26	-0.32	0	0	0	16
1105	A0A140TAA1			0	-0.23	0	0	0	0	29		6728	Q6TUD3;Q6AXX5		Rdh11	0	-0.39	-0.32	0	0	0	26
4023	G3V7L6;Q63347	26S protease regulatory subunit 7	Psmc2	-0.17	-0.15	0	0.13	0.26	0.39	16		814	A0A0G2K777;A1L1L6	Mitochondrial Rho GTPase	Rhot1	0	-0.2	-0.2	0	0.08	0	16
5115	Q8CHN7;P63055	Purkinje cell protein 4	Pcp4	0	-0.26	0.23	0	0	0	29		1043	A0A0H2UHN2;O35760	Isopentenyl-diphosphate Delta-isomerase 1	Idi1	-0.42	-0.64	-0.48	0	0	0	26
6263	Q63569;Q6P6U2	26S protease regulatory subunit 6A	Psmc3	0	0	0	0.12	0.25	0.4	17		4873	P35745;D4A1G1	Acylphosphatase-2;Acylphosphatase	Acyp2	0	-0.45	-0.31	0	0	0	26
5118	P63086	Mitogen-activated protein kinase 1	Mapk1	-0.45	-0.47	-0.33	0	0	0.17	3		955	A0A0G2KA27;O08873	MAP kinase-activating death domain protein	Madd	0	-0.22	-0.17	0	0.11	0	16
134	A0A0G2JSR2;B1AC44;P40748;Q5M8A7	Synaptotagmin-3	Syt3	-0.49	0	0	0	0	0	26		6912	Q8VI04	Isoaspartyl peptidase/L-asparaginase;Isoaspartyl peptidase/L-asparaginase alpha chain;Isoaspartyl peptidase/L-asparaginase beta chain	Asrgl1	0	-0.21	-0.31	0	0	0	16
5210	P97546;P97546-3;P97546-1	Neuroplastin	Nptn	-0.52	-0.84	-0.48	0	0	0.12	23		99	A0A0G2JSG6;P29410-2;P29410	Adenylate kinase 2, mitochondrial;Adenylate kinase 2, mitochondrial, N-terminally processed	Ak2	0	-0.3	-0.41	0	0	-0.23	16
4159	G3V945;P51650;P51650-2	Succinate-semialdehyde dehydrogenase, mitochondrial	Aldh5a1	-0.2	-0.19	-0.17	0	0	0	20		12	A0A096MJ78;A0A0G2K3F4;B2GV40		Spred3	0	-0.9	0	0	0	0	17
5128	P63170;A0A0G2JU43	Dynein light chain 1, cytoplasmic	Dynll1	0	-0.43	0	0	0	0.24	15		1250	B0BMU8;Q80XX4	Musculoskeletal embryonic nuclear protein 1	Mustn1	0	-1.49	0	0	0	0	17
5129	P63245;A0A0G2JZE6;A0A0G2JY24	Guanine nucleotide-binding protein subunit beta-2-like 1;Guanine nucleotide-binding protein subunit beta-2-like 1, N-terminally processed	Gnb2l1	0	0	0	0	0	0.25	32		2384	D3ZQP6		Sema7a	0	-0.89	0	0	0	0	17
5130	P63249	cAMP-dependent protein kinase inhibitor alpha	Pkia	0	-0.8	-0.75	0	0	0	2		3291	F1LM29;F1LZI7;P58751-3;P58751-2;P58751	Reelin	Reln	0	-1.26	0	0	0	0	17
5132	P63281;A0A0G2KB55	SUMO-conjugating enzyme UBC9	Ube2i	0	0	0	0	0	0.65	5		3995	G3V7A5;P35952	Low-density lipoprotein receptor	Ldlr	-0.36	-1.31	0	0	0	0	17
5133	P63312;CON__P21752	Thymosin beta-10	Tmsb10	0	-0.3	-0.29	0	0	0	4		46	A0A096MK18		Ppip5k2	0	-1.49	0	0	0	0	17
5956	Q5RKI1;A0A0G2K8B7;O08772	Eukaryotic initiation factor 4A-II;Eukaryotic initiation factor 4A-II, N-terminally processed	Eif4a2	-0.42	-0.49	0	0	0.21	0.46	21		5878	Q5PPI4	Lysosome-associated membrane glycoprotein 5	Lamp5	0	-1.44	0	0	0	0	17
5135	P63322	Ras-related protein Ral-A	Rala	0	0	-0.12	0	0	0	28		6887	Q8K585;D3ZAX1;Q8K585-2	High mobility group protein HMG-I/HMG-Y	Hmga1;RGD1564836	0	-0.87	0	0	0	0	17
5136	P63329	Serine/threonine-protein phosphatase 2B catalytic subunit alpha isoform	Ppp3ca	0	-0.97	-0.49	0	0	0	2		6905	Q8VDA1;F1LMG0;A0A0G2JXB8	Calsyntenin-2	Clstn2	0	0	0.83	0	0	0	18
5138	P63331;A0A0G2JYA4	Serine/threonine-protein phosphatase 2A catalytic subunit alpha isoform	Ppp2ca	0	-0.23	-0.14	0	0	0	4		6674	Q9QZF6;Q6P7C7	Transmembrane glycoprotein NMB	Gpnmb	0	0	0.8	0	0.26	0	18
5139	P67779;D3ZFH6	Prohibitin	Phb;Phb-ps1	-0.2	0	0	0	0	0	13		5476	Q499T2	Gamma-interferon-inducible lysosomal thiol reductase	Ifi30	0	0	0.82	0	0	0	18
1730	F7EUJ8;B5DF52		C1qtnf4	0	-0.22	0	0	0	0	29		1120	A0A140TAF4;P85171	MAM domain-containing glycosylphosphatidylinositol anchor protein 1	Mdga1	0	0	1.23	0	0	0	18
5142	P68101	Eukaryotic translation initiation factor 2 subunit 1	Eif2s1	0	0	0	0	0	0.31	1		580	A0A0G2K1S6;P13697;F1LQQ1	NADP-dependent malic enzyme;Malic enzyme	Me1	0	0.16	0.77	0	0	0.21	18
4252	Q5BJ93;M0R5J4;P04764;Q5EB49;A0A0G2K4Y2	Alpha-enolase	Eno1	-0.19	-0.27	-0.11	0	0	0	20		5273	Q05096;Q05096-3;Q05096-2	Unconventional myosin-Ib	Myo1b	0	0	0.67	0	0	0	18
5147	P68403-2;P68403;F1LS42;F1LS36;A0A0G2K5Q0;Q6LDV0	Protein kinase C beta type;Protein kinase C	Prkcb	0	-0.43	-0.33	0	0	0	33		742	A0A0G2K5J5;D4A9F4		Ntng2	0	0	0.95	0	0	0	18
6706	Q6PST4	Atlastin-1	Atl1	-0.4	-0.54	-0.22	0	0.22	0.35	21		6023	Q5U318	Astrocytic phosphoprotein PEA-15	Pea15	0	0	0.68	0	0	0	18
5149	P69682	Adaptin ear-binding coat-associated protein 1	Necap1	0	0	-0.23	0	0	0	28		5130	P63249	cAMP-dependent protein kinase inhibitor alpha	Pkia	0	0	0.98	0.23	0	0	18
5151	P69897	Tubulin beta-5 chain	Tubb5	0	-0.26	0	0.09	0	0.16	15		6897	Q8R4R9	Protein phosphatase 1 regulatory subunit 14C	Ppp1r14c	0	0	0.63	0	0	0	18
5159	P70566	Tropomodulin-2	Tmod2	0	0	-0.08	0	0	0	28		1135	A0A140UHX4;Q4QRB9;Q6V7V4;Q6U7I6		Prkag2	0	0	0.84	0	0.37	0	18
1314	B0BNG3		Lman2	0	0	0	0.17	0.27	0.39	17		5165	P70600-3;P70600	Protein-tyrosine kinase 2-beta	Ptk2b	0	0	0.78	0.31	0.57	0	18
4563	P05708	Hexokinase-1	Hk1	-0.37	-0.29	-0.18	0	0	0	20		4859	P35289	Ras-related protein Rab-15	Rab15	0	0	0.66	0	0	0	18
4564	P05712	Ras-related protein Rab-2A	Rab2a	-0.32	-0.26	-0.22	0	0	0	20		7050	Q9JK00	Sodium channel subunit beta-3	Scn3b	0	0	0.93	0.1	0.18	0	18
5168	P70645;A1A5L1;A0A096MJX0	Bleomycin hydrolase	Blmh;LOC100911400	0	0	-0.26	0	0	0	28		4072	G3V851;Q9JI12	Vesicular glutamate transporter 2	Slc17a6	0	0	1.05	0	0	0	18
5172	P81155	Voltage-dependent anion-selective channel protein 2	Vdac2	0	0	0	0.11	0.06	0	25		4918	P47861	Synaptotagmin-5	Syt5	0	0	0.68	0	0.45	0	18
5053	P62198;O35050	26S protease regulatory subunit 8	Psmc5	-0.22	-0.2	0	0.12	0.24	0.33	16		1058	A0A0H2UHS9;Q3KR56	GRAM domain-containing protein 1A	Gramd1a	0	0	-0.35	0	0	0	19
5174	P81795;A0A096MJB9	Eukaryotic translation initiation factor 2 subunit 3	Eif2s3	0	0	0	0	0	0.27	32		1156	A0A1W2Q656;Q5U215		Dner	0	0	-0.49	0	0	0	19
5177	P82995;Q6B437	Heat shock protein HSP 90-alpha	Hsp90aa1	-0.24	-0.24	-0.07	0	0	0.18	37		1167	A0JN17;P08644-2;P08644	GTPase KRas;GTPase KRas, N-terminally processed	Kras	0	0	-0.4	0	0	0.09	19
5179	P83732;A0A0H2UH99;M0RBD1	60S ribosomal protein L24	Rpl24;RGD1560821	0	0	0	0	0	0.28	32		1208	A2RRU4	Sterol regulatory element-binding protein cleavage-activating protein	Scap	0	0	-0.49	0	0	0	19
5181	P83941;A0A0G2K2A0;A0A096MIY6	Transcription elongation factor B polypeptide 1	Tceb1	-0.27	-0.18	0	0	0.11	0.28	37		1243	A9UMV9		Ndufa7l	0	0	-0.28	0	0	0	19
5183	P84039	Ectonucleotide pyrophosphatase/phosphodiesterase family member 5	Enpp5	0	0	0	0	0.32	0	34		1259	B0BMY7		Twf2	0	0	-0.28	0	0	0	19
3145	D4ACG7;H1UBM5		Cpne6	-0.35	-0.85	-0.39	0.19	0.25	0.33	21		1361	B0LT89;H9KVF3	Serine/threonine-protein kinase 24;Serine/threonine-protein kinase 24 35 kDa subunit;Serine/threonine-protein kinase 24 12 kDa subunit	Stk24	0	0	-0.38	0	0	0	19
5186	P84082	ADP-ribosylation factor 2	Arf2	0	0	0	0	0	0.61	5		1410	B1WBY7		Erlin1	0	0	-0.43	0	-0.23	0	19
5187	P84083	ADP-ribosylation factor 5	Arf5	0	-0.39	0	0	0	0.26	15		1486	B2GV75;P84850;A0A0A0MXZ3	D-2-hydroxyglutarate dehydrogenase, mitochondrial	D2hgdh	0	0	-0.38	0	0	0	19
6010	Q5U2X6	Coiled-coil domain-containing protein 47	Ccdc47	0	-0.22	0	0	0	0	29		1490	B2GV87-3;B2GV87-2;B2GV87;P70530;P70529	Receptor-type tyrosine-protein phosphatase epsilon	Ptpre	0	0	-0.34	0	0	0	19
5189	P84092;A0A140TAH5	AP-2 complex subunit mu	Ap2m1	0	-0.33	-0.19	0	0	0	4		1654	B4F795	Choline transporter-like protein 2	Slc44a2	0	0	-0.36	0	0	0	19
519	A0A0G2K0M8			0	-0.09	-0.18	0	-0.14	-0.19	28		1790	B7X6I3;Q5FVI4	Cell cycle exit and neuronal differentiation protein 1	Cend1	0	0	-0.29	0	0	0	19
5192	P84817;P84817-3;P84817-2	Mitochondrial fission 1 protein	Fis1	-0.42	-0.29	0	0	0	0	6		1797	C6ZII9;B2RZ31		Sirt3	0	-0.08	-0.37	0	0	-0.15	19
5193	P84889	Vang-like protein 2	Vangl2	0	0	-0.22	0	0	0	28		194	A0A0G2JTW1			0	0	-0.38	0	0	0	19
5197	P85845;Q80X10	Fascin	Fscn1	0	-0.58	-0.43	0	0	0	33		2	Q99JC6;A0A023IM54;A0A0U1RS43		Tapbp	0	0	-0.29	0	0	0	19
5198	P85968	6-phosphogluconate dehydrogenase, decarboxylating	Pgd	0	0	-0.25	0	0	0	28		2031	F1LVA8;D3ZE30;Q63767-2;Q63767	Breast cancer anti-estrogen resistance protein 1	Bcar1	0	0	-0.39	0	0	0	19
5199	P85971;G3V8D5	6-phosphogluconolactonase	Pgls	-0.24	-0.31	0	0.13	0	0.14	6		2043	D3ZEH2		Foxred1	0	0	-0.34	0	0	0	19
5200	P85973	Purine nucleoside phosphorylase	Pnp	0	0	0	-0.26	0	0	25		2131	D3ZH41		Ckap4	0	0	-0.42	0	0	0	19
5201	P86173;A0A0G2JW70	Actin-like protein 6B	Actl6b	0	-0.4	0	0	0	0.6	22		2181	D3ZIP8		Endod1	0	0	-0.43	0	0	0	19
5202	P86182	Coiled-coil domain-containing protein 22	Ccdc22	0	0	0	0	0	0.21	32		2404	D3ZRF6;M0R715		Pnpla6	0	0	-0.43	0	0	0	19
5203	P97519	Hydroxymethylglutaryl-CoA lyase, mitochondrial	Hmgcl	0	-0.18	-0.2	0	0	0	4		2480	D3ZTW7		Atpaf2	0	0	-0.31	0	0	0	19
5207	P97536	Cullin-associated NEDD8-dissociated protein 1	Cand1	0	-0.19	-0.1	0	0	0.11	29		2568	D3ZWA1		Fam63b	0	0	-0.45	0	0	0	19
1050	A0A0H2UHQ3;B5DFH2;P0C5W1	Microtubule-associated protein 1S;MAP1S heavy chain;MAP1S light chain	Map1s	0	-0.22	0	0	0	0	29		2600	D3ZWV8		Tiam1	0	0	-0.33	0	0	0	19
4600	P08461	Dihydrolipoyllysine-residue acetyltransferase component of pyruvate dehydrogenase complex, mitochondrial	Dlat	-0.16	-0.29	-0.18	0	0	0	20		2602	D3ZWX4		Nckipsd	0	0	-0.36	0	0	0	19
5214	P97577	Fasciculation and elongation protein zeta-1	Fez1	0	0	-0.11	0	0	0	28		2645	D3ZY71		LOC100910137	0	0	-0.43	0	0	0	19
2886	D4A4U3		Mdp1	0	-0.22	0	0	0	0	29		2667	D3ZYY0		Sdr39u1	0	0	-0.35	0	0	0	19
5217	P97610	Synaptotagmin-12	Syt12	0	-0.56	-0.63	0	0	0	2		2895	D4A517		Slc39a10	0	0	-0.41	0	0	0	19
5218	P97612	Fatty-acid amide hydrolase 1	Faah	0	-0.69	-0.41	0	0.14	0.29	2		2903	D4A563		Peak1	0	0	-0.37	0	0	0	19
5220	P97629;A0A0G2JUW8;A0A0H2UHK5;A0A0G2JYN3;Q8R438	Leucyl-cystinyl aminopeptidase	Lnpep	0	0	0	0	0.25	0	10		294	A0A0G2JW50;F1LXD6		Pitpnm2	0	0	-0.29	0	0	0	19
1670	B4F7E7		Mpp5	0	-0.22	0	0	0	0	29		3030	D4A8N2		Fdx1l	0	0	-0.41	0	0	0	19
5225	P97710	Tyrosine-protein phosphatase non-receptor type substrate 1	Sirpa	0	-0.4	-0.4	0	0	0	33		3067	D4A9V7		LOC100911305	0	0	-0.47	0	0	0	19
3990	G3V781;Q9JIM0	Double-strand break repair protein MRE11A	Mre11a	0	-0.22	0	0	0	0	29		3077	D4AA35		Asmtl	0	0	-0.47	0	0	0	19
4389	O08651	D-3-phosphoglycerate dehydrogenase	Phgdh	0	-0.22	0	0	0	0	29		3153	D4ACN8	Plasminogen receptor (KT)	Plgrkt	0	0	-0.29	0	0	0	19
5229	P97846	Contactin-associated protein 1	Cntnap1	-0.45	-0.34	-0.23	0	0	0.21	3		3260	Q58GH6;E9PTA4		Adam9	0	0	-0.32	0.24	0	0	19
1978	D3ZYN2;D3ZCG2;D3ZSN6;D3ZJJ7;D4A1V5;D4ADI4	Kinesin-like protein	Kif21a	0	-0.43	-0.14	0	0.12	0	36		3366	F1LPB8;Q6P6S9	Ectonucleoside triphosphate diphosphohydrolase 5	Entpd5	0	0	-0.48	0	0	0	19
5230	Q6IN39;P97852	Peroxisomal multifunctional enzyme type 2;(3R)-hydroxyacyl-CoA dehydrogenase;Enoyl-CoA hydratase 2	Hsd17b4	-0.24	-0.04	0.08	0	0	0.21	13		340	A0A0G2JX25;Q5FVP6		Gmpr2	0	0	-0.36	0	0	0	19
5231	P97878	Exocyst complex component 5	Exoc5	-0.2	-0.32	0	0	0	0.24	37		3424	F1LQY6		Necab2	0	0	-0.36	0	0	0	19
773	A0A0G2K6F2;F1M620		Csmd2	0	-0.6	-0.16	0	-0.36	0	35		3437	F1LR98;Q8R5H2;Q9JIW3		Cdh10	0	0	-0.49	0	0	0	19
5241	Q00657;F1LS79	Chondroitin sulfate proteoglycan 4	Cspg4	-0.24	0	0	0	0	0	13		3463	F1LRY5;Q64380	Sarcosine dehydrogenase, mitochondrial	Sardh	0	0	-0.5	0	0	0	19
5244	Q00981	Ubiquitin carboxyl-terminal hydrolase isozyme L1	Uchl1	0	-0.33	0	0	0.22	0.24	15		3509	F1LTX8;Q6TXI6		Lpgat1;LOC317456	0	0	-0.29	0	0	0	19
5248	Q01460	Di-N-acetylchitobiase	Ctbs	0	0	0.53	0	0	0.43	7		3604	F1LZW6		Slc25a13	0	0	-0.39	0	0	0	19
5254	Q02356;A0A0G2K3U1	AMP deaminase 2	Ampd2	0	-0.39	-0.25	0	0	0	4		3692	F1M625;A0A0G2K2V1	Ubiquitin carboxyl-terminal hydrolase	Usp46	0	0	-0.3	0	0	0	19
4607	P09117;A0A0G2K3Q6;Q6PCU3;A0A0G2QC57	Fructose-bisphosphate aldolase C;Fructose-bisphosphate aldolase	Aldoc	-0.27	-0.28	-0.15	0	0	0	20		3714	F1M790;Q62786	Prostaglandin F2 receptor negative regulator	Ptgfrn	0	0	-0.4	0	0	0	19
5258	Q02769;Q8BHH4	Squalene synthase	Fdft1	-0.41	-0.24	0	0	0	0.66	37		3726	F1M7V4;D3Z9C7		Pclo	0	0	-0.38	0	0	0	19
3646	F1M2K6		Pkp4	0	-0.22	0	0	0	0	29		375	D4A8D5;A0A0G2JXT8		Flnb	0	0	-0.28	0	0	0	19
7107	Q9R063-2;A0A0G2JSS8;Q9R063	Peroxiredoxin-5, mitochondrial	Prdx5	0	-0.22	0	0	0	0	29		3824	F2W8B2;P21451	Endothelin B receptor	Ednrb	0	0	-0.28	0	0	0	19
5263	Q03346	Mitochondrial-processing peptidase subunit beta	Pmpcb	-0.3	0	-0.09	0	0	0	13		3845	Q7TQ25;Q7TNM3;F7EYB9		Omg	0	0	-0.41	0	0.09	0	19
4453	O35964	Endophilin-A2	Sh3gl1	0	-0.22	0	0	0	0	29		3993	G3V796;P08503	Medium-chain specific acyl-CoA dehydrogenase, mitochondrial	Acadm	0	0	-0.32	0	0	0	19
5269	Q04462;Q4FZR0;A0A0G2JVG2	Valine--tRNA ligase	Vars	0	0	0	0	0	0.32	1		40	A0A096MJY6		Gbe1	0	0	-0.32	0	0	0	19
1023	A0A0H2UHE1;P13086;P70631	Succinyl-CoA ligase [ADP/GDP-forming] subunit alpha, mitochondrial	Suclg1	0	-0.22	0	0	0	0	29		410	A0A0G2JYH7;B0BN10		Sh2d3c	0	0	-0.38	0	0	0	19
5275	Q05175	Brain acid soluble protein 1	Basp1	0	0	-0.24	0	0	0	28		4100	G3V8G4;P55068;P55068-2;A0A0G2JYH8	Brevican core protein	Bcan	0	0	-0.28	0	0	0	19
4670	P12007	Isovaleryl-CoA dehydrogenase, mitochondrial	Ivd	-0.34	-0.16	-0.13	0	0	0	20		4254	M0R5P8;F1M542		Adam22	0	0	-0.32	0	0	0	19
2449	D3ZT36		Adam23	0	-0.21	0	0	0	0	29		4313	M0R959		Mmab	0	0	-0.48	0	0	0	19
5282	Q06486;Q06486-2	Casein kinase I isoform delta	Csnk1d	-0.39	-0.37	0	0	0	0	6		4346	M0RB22		Ptprd	0	0	-0.4	0	0	0	19
2525	D3ZUX5		Chchd3	0	-0.21	0	0	0	0	29		4527	O89035		Slc25a10	0	-0.13	-0.4	0	0	-0.15	19
5286	Q07009;Q6LBQ2	Calpain-2 catalytic subunit	Capn2	0	0	0	0	0.09	0.18	32		4573	P06687	Sodium/potassium-transporting ATPase subunit alpha-3	Atp1a3	0	-0.07	-0.32	0.07	0.15	0	19
5288	Q07205	Eukaryotic translation initiation factor 5	Eif5	-0.26	0	0	0	0	0.38	1		4578	P07151	Beta-2-microglobulin	B2m	0	0	-0.28	0	0	0	19
6045	Q5XHX3;A0A0G2K6I4		Enah	0	-0.21	0	0	0	0	29		4611	P09495;A0A0G2K2G8	Tropomyosin alpha-4 chain	Tpm4	0	0	-0.46	0	0	0	19
5293	Q07984	Translocon-associated protein subunit delta	Ssr4	0	0	0	0	0	0.3	32		4637	P0DN35			0	0	-0.31	0	0	0	19
5295	Q08163	Adenylyl cyclase-associated protein 1	Cap1	-0.29	-0.24	-0.22	0	0	0.07	20		4701	Q66HH8;P14668;O70371	Annexin;Annexin A5	Anxa5	0	0	-0.42	0	0	0	19
5297	Q08602	Geranylgeranyl transferase type-2 subunit alpha	Rabggta	0	-0.25	-0.22	0	0.07	0.13	4		4760	P20070-3;P20070;P20070-2	NADH-cytochrome b5 reductase 3;NADH-cytochrome b5 reductase 3 membrane-bound form;NADH-cytochrome b5 reductase 3 soluble form	Cyb5r3	0	0	-0.28	0	0	0	19
530	A0A1B0GWY5;A0A0G2K0V4;Q5FVC2;A0A1B0GWX6;A0A1B0GWW1	Rho guanine nucleotide exchange factor 2	Arhgef2	0	-0.65	-0.37	0	0	0	33		4783	Q68G44;P22791	Hydroxymethylglutaryl-CoA synthase, mitochondrial	Hmgcs2	0	0	-0.28	0	0	0	19
4714	P15999;F1LP05	ATP synthase subunit alpha, mitochondrial;ATP synthase subunit alpha	Atp5a1	-0.43	-0.23	-0.18	0	0	0	20		4850	P33124	Long-chain-fatty-acid--CoA ligase 6	Acsl6	0	0	-0.51	0	0	0	19
5307	Q0D2L6;B2RZ38		Rragc;Rragd	0	0	0	0	0	0.37	1		490	A0A0G2K059;M0RDI5		Mcu	0	0	-0.43	0	0	0	19
5314	Q0VGK4;A0A0G2K080;A0A0G2K8E7	Glycerophosphodiester phosphodiesterase domain-containing protein 1	Gdpd1	0	0	-0.2	0	0.19	0.35	17		4912	P47727;M0R3X6;A0A0G2JSV2;A0A0G2K658;A0A096MJ24;O08559;Q9QZI6;Q9QZI5	Carbonyl reductase [NADPH] 1	Cbr1	0	0	-0.36	0	0	0.19	19
5322	Q10739	Matrix metalloproteinase-14	Mmp14	0.64	0	0	0	0	0	25		4941	P50411;A0A0H2UHA0	Protein phosphatase inhibitor 2	Ppp1r2	0	0	-0.39	0	0	0	19
5323	Q14TE9;Q63177	DNA topoisomerase 2	Top2b	0	-0.11	-0.09	0	0.45	0.55	11		5039	P61765	Syntaxin-binding protein 1	Stxbp1	0	0	-0.29	0	0.19	0	19
2676	M0RAX4;D3ZZ54;P62882;Q45QL0	Guanine nucleotide-binding protein subunit beta-5	Gnb5	0	-0.21	0	0	0	0	29		5073	P62749	Hippocalcin-like protein 1	Hpcal1	0	0	-0.44	0	0	0	19
5511	Q4KLH4;A0A0G2JYN7	Paraspeckle component 1	Pspc1	-0.49	0	0	0.11	0	0	26		5119	Q6AYZ4;P63088-2;P63088;A0A0G2JVK2;Q04101	Serine/threonine-protein phosphatase;Serine/threonine-protein phosphatase PP1-gamma catalytic subunit	Ppp1cc	0	0	-0.4	0	0.23	0	19
2493	D3ZU56;F1M797;D3ZXE2;Q6TRW4-2;Q6TRW4-3;Q6TRW4;D3ZMU3	Sister chromatid cohesion protein PDS5 homolog B	Pds5b	0	0	0	0	0.58	0.61	11		5316	Q0ZCA7;A0A0H2UI15;B1WBM7	C-type lectin domain family 2 member L	Clec2l	0	0	-0.36	0	0	0	19
5330	Q1JU68;Q4G020	Eukaryotic translation initiation factor 3 subunit A	Eif3a	0	-0.21	0	0	0.11	0.4	22		5355	Q2THW7	Palmitoyltransferase ZDHHC5	Zdhhc5	0	0	-0.5	0	0	0	19
4164	G3V963;Q80WF4	Transmembrane protein 132A	Tmem132a	-0.48	0	0	0	0	0.26	26		5389	Q3B8R7		Mrpl47	0	0	-0.3	0	0	0	19
5334	Q1RP74;Q1W1V7		LOC100911774;Tbcb	-0.31	0	0	0	0	0	13		5397	Q3KRD0	Aspartate--tRNA ligase, mitochondrial	Dars2	0	0	-0.34	0	0	0	19
5340	Q2I6B2;Q2I6B5;Q2I6B3;Q2I6B4;P25286-2;P25286	V-type proton ATPase subunit a;V-type proton ATPase 116 kDa subunit a isoform 1	Atp6v0a1	0	-0.28	-0.22	0	0	0	4		5530	Q4KM45	UPF0687 protein C20orf27 homolog		0	0	-0.42	0	0	0	19
4086	G3V8B6;A0A0G2JTW5;O88761;Q5PPJ7;A1A5N2;Q3KR62	26S proteasome non-ATPase regulatory subunit 1	Psmd1	-0.18	-0.14	0	0.15	0.26	0.41	16		5589	Q4V887	Zinc transporter ZIP6	Slc39a6	0	0	-0.48	0	0	0	19
535	A0A0G2K0X9;G3V699;Q9Z2Q1;Q9Z2Q1-2	Protein transport protein Sec31A	Sec31a	0	0	0	0	0	0.35	1		5615	Q4V8I7	Volume-regulated anion channel subunit LRRC8A	Lrrc8a	0	0	-0.28	0	0	0	19
4741	P19234	NADH dehydrogenase [ubiquinone] flavoprotein 2, mitochondrial	Ndufv2	-0.2	-0.17	-0.16	0	0	0	20		5651	Q566E5	KDEL motif-containing protein 2	Kdelc2	0	0	-0.28	0	0	0	19
5357	Q2YDU8;Q2YDU8-2	Protein spinster homolog 1	Spns1	0	0	0	0	0.18	0	10		5675	Q58FK9;F1M572	Kynurenine--oxoglutarate transaminase 3	Ccbl2	0	0	-0.41	0	0	0	19
5362	Q3KR80;Q32KK2		Arsa	0	0	0	0	0	0.32	1		577	A0A0G2K1Q9;Q9JMB3;A3E0T0		Epb41l3	0	0	-0.37	0	0	0	19
5363	Q32PX2;A0A0U1RRR6	Aminoacyl tRNA synthase complex-interacting multifunctional protein 2	Aimp2	0	0	0	0	0.18	0	10		5791	Q5HZE0	Mitochondrial basic amino acids transporter	Slc25a29	0	0	-0.42	0	0	0	19
5366	Q32PY7;A0A0G2K226		Nudcd3	-0.27	-0.3	0	0	0	0	6		5865	Q5M9G9	Protein TBRG4	Tbrg4	0	0	-0.28	0	0	0	19
2338	D3ZPF2		Mcat	0	-0.21	0	0	0	0	29		5866	Q5M9H2;P45953	Very long-chain specific acyl-CoA dehydrogenase, mitochondrial	Acadvl	0	0	-0.29	0	0	0	19
5380	Q3B7U9	Peptidyl-prolyl cis-trans isomerase FKBP8	Fkbp8	-0.39	-0.29	-0.13	0	0	0	6		5867	Q5M9H4;P13638	Sodium/potassium-transporting ATPase subunit beta-2	Atp1b2	0	0	-0.46	0	0	0	19
5381	Q3B7V5;Q562A5		Rab2b	-0.37	0	0	0	0	0	13		5971	Q5U1Z9		Mtx2	0	0	-0.31	0	0	0	19
6432	Q68FX1	Mannose-6-phosphate isomerase	Mpi	0	-0.21	0	0	0	0	29		5994	Q5U2R7	LDLR chaperone MESD	Mesdc2	0	0	-0.39	-0.17	0	0	19
5997	Q5U2S7		Psmd3	-0.21	0	0	0.17	0.21	0.4	16		6018	Q5U308;A0A0H2UHA3	Volume-regulated anion channel subunit LRRC8D	Lrrc8d	0	0	-0.39	0	0	0	19
539	A0A0G2K121;Q5FVQ4	Malectin	Mlec	0	0	0	0	0.15	0	10		603	A0A0G2K2B5;A0A096MJA9;A0A096MKE0		Asph	0	0	-0.38	0	0	0	19
5393	Q3KR55;Q7TP17	Splicing factor U2AF 26 kDa subunit	U2af1;U2af1l4	0	-0.16	0	0	0	0.31	15		6045	Q5XHX3;A0A0G2K6I4		Enah	0	0	-0.33	0	0	0	19
5394	Q3KR59	Ubiquitin carboxyl-terminal hydrolase 10	Usp10	0	0	0	0	0.33	0	34		6080	Q5XI78	2-oxoglutarate dehydrogenase, mitochondrial	Ogdh	0	0	-0.41	0	0	0	19
5398	Q3KRD5	Mitochondrial import receptor subunit TOM34	Tomm34	0	-0.2	0	0	0.36	0.39	22		6101	Q5XIE1	Protein THEM6	Them6	0	0	-0.48	0	0	0	19
540	A0A0G2K132			0	0	0	0	0.33	0	34		6117	Q5XIG9		Mtfp1	0	0	-0.4	0	0	0	19
5402	Q3KRE3;Q45QK2;O35358	Guanine nucleotide-binding protein subunit gamma	Gng10	-0.3	0	0	-0.24	0	0	13		6124	Q5XII9	Mitochondrial fission regulator 1-like	Mtfr1l	0	0	-0.28	0	0	0	19
698	A0A0G2K4G3;Q71UE8	NEDD8	Nedd8	0	-0.21	0	0	0	0	29		6172	Q62688;A0A0G2K4N6;F1LP62	Inactive phospholipase C-like protein 1;Phosphoinositide phospholipase C	Plcl1	0	0	-0.39	0	0	0	19
2146	D3ZHK4		Rb1cc1	-0.47	0	0	0	0.49	0.39	16		619	A0A0G2K2S2;P11167	Solute carrier family 2, facilitated glucose transporter member 1	Slc2a1	0	0	-0.48	0	0	0	19
5406	Q3L472;Q32KJ3;B2GUU3;Q5BJQ8		Sulf2	-0.2	0	0	0	0	0	13		6200	Q62888;F1LQ41;A0A0U1RRX0;Q62888-2	Neuroligin-2	Nlgn2	0	0	-0.39	0	0	0	19
5410	Q3MHS9;Q5BJY2		Cct6a	-0.19	-0.15	-0.07	0	0.13	0.25	37		6308	Q641Y5	Ubiquitin-like modifier-activating enzyme ATG7	Atg7	0	0	-0.28	0	0	0.14	19
5414	Q3MIE4	Synaptic vesicle membrane protein VAT-1 homolog	Vat1	0	0	0.16	0	0	0	25		6464	Q6AXX6	Redox-regulatory protein FAM213A	Fam213a	0	0	-0.33	0	0	0	19
5416	Q3MIE9		Sms	0	0	0	0.2	0.29	0	10		647	A0A0G2K398;F8WFK6;P36970-2;P36970;Q91XR8;Q76LU9;A0A0G2KAD1	Glutathione peroxidase;Phospholipid hydroperoxide glutathione peroxidase, mitochondrial;Phospholipid hydroperoxide glutathione peroxidase, nuclear	Gpx4	0	0	-0.33	0	0	0	19
198	A0A0G2JTY6;F1LRK4;Q3SYP9		Grsf1	-0.28	0	-0.21	0	0	0	8		6603	Q6IUR5	Neudesin	Nenf	0	0	-0.42	0	0	0	19
5425	Q3T1H3;F1LUV9		Ncam1	0	0	-0.32	0	0	0	14		6640	Q6P0K8;P70565	Junction plakoglobin	Jup	0	0	-0.34	0	0	0	19
5427	Q3T1J1	Eukaryotic translation initiation factor 5A-1	Eif5a	0	0	-0.33	0	0.27	0	14		6642	Q6P2A5;P29411	GTP:AMP phosphotransferase AK3, mitochondrial	Ak3	0	0	-0.28	0	0	0	19
4765	Q8CH85;Q80WY4;P20595;Q80WY5	Guanylate cyclase soluble subunit beta-1	Gucy1b3	-0.27	-0.23	-0.27	0	0	0	20		6692	Q812B0;Q6PCT8	Succinate dehydrogenase [ubiquinone] cytochrome b small subunit, mitochondrial	Lrrp1;Sdhd	0	0	-0.29	0	0	0	19
186	A0A0G2JTR4;A0A0G2JZZ7			-0.28	-0.45	0	0.15	0.2	0.36	21		6730	Q6TUG0	DnaJ homolog subfamily B member 11	Dnajb11	0	0	-0.31	0	0	0	19
5872	Q5NDF0	Protein O-linked-mannose beta-1,4-N-acetylglucosaminyltransferase 2	Pomgnt2	0	0	0	0	0.27	0.26	17		6756	Q704E8;F1LNV4;A0A0G2K866;A0A0G2KAC7	ATP-binding cassette sub-family B member 7, mitochondrial	Abcb7	0	0	-0.31	0	0	0	19
5436	Q3ZB99		Tjp2	0	0	0	0	0.24	0	10		6781	Q78P75	Dynein light chain 2, cytoplasmic	Dynll2	0	0	-0.41	0	0	0	19
5437	Q3ZBA0	Tectonin beta-propeller repeat-containing protein 1	Tecpr1	0	-0.51	-0.48	0	0	0	33		6934	Q920L7;D4A612	Elongation of very long chain fatty acids protein 5;Elongation of very long chain fatty acids protein 2	Elovl5;Elovl2	0	0	-0.32	0	0	0	19
544	Q6PAH0;Q65ZS7;A0A0G2K151;P02650	Apolipoprotein E	Apoe	0.15	0	0	0	0.26	0.27	17		6954	Q99JD4	CLIP-associating protein 2	Clasp2	0	0	-0.33	0	0	0	19
5446	Q712J3;Q496Z1;Q712J2		Bicd2	0	0	0	0	0.26	0	10		6959	Q99MI5		LOC100912604	0	0	-0.32	0.12	0.09	0	19
5449	Q497A2		Slc35b2	0	0	0.13	0	0	0	25		6965	Q99N27	Sorting nexin-1	Snx1	0	0	-0.3	0	0	0	19
5457	Q498D8		Rbx1	0	0	-0.14	0	0	0	28		6980	Q99PW1;Q6AXQ3;A0A0G2K2V7;F1LM93	Non-specific protein-tyrosine kinase;Tyrosine-protein kinase Yes	Yes1	0	0	-0.33	0	0	0	19
5460	Q498N3;Q9QUR2-2;Q9QUR2	Dynactin subunit 4	Dctn4	0	-0.19	0	0	0.17	0.35	22		70	S5RZM8;Q8SEZ5;A0A097PE04;P00406	Cytochrome c oxidase subunit 2	COX2;Mt-co2;Mtco2	0	0	-0.29	0	0	0	19
5461	Q498R3	DnaJ homolog subfamily C member 10	Dnajc10	-0.41	-0.11	-0.13	0	0	0.27	37		7036	Q9JIS1-8;Q9JIS1-9;A0A096P6M3;A0A096P6M8;F1LNC5;Q9JIS1;Q9JIS1-6;Q9JIS1-3;Q9JIS1-4;Q9JIS1-2;Q9JIS1-5;Q9JIS1-7;Q9JIS1-10	Regulating synaptic membrane exocytosis protein 2	Rims2	0	0	-0.3	0	0	0	19
2332	D3ZP47		Phpt1	0	-0.21	0	0	0	0	29		7111	Q9R0C9;Q9R0C9-2	Sigma non-opioid intracellular receptor 1	Sigmar1	0	0	-0.38	0	0	0	19
5469	Q499N5	Acyl-CoA synthetase family member 2, mitochondrial	Acsf2	0	0	0	-0.12	0	0	25		7130	Q9WUD2;A0A0G2JSH6	Transient receptor potential cation channel subfamily V member 2	Trpv2	0	0	-0.31	0	0	0	19
5474	Q499S6		Ctsf	0	0	0	0	0	0.2	32		719	A0A0G2K528;B5DF99;D3Z9R7		Stx16	0	0	-0.31	0	0	0	19
5476	Q499T2	Gamma-interferon-inducible lysosomal thiol reductase	Ifi30	0	0	0.53	0	0	0.32	7		770	Q792R1;F1LNP2;P97548;P97549;A0A0G2K6E5;P97711;Q66HL7;Q62833;P70507-2;P70507	G protein-coupled receptor kinase 6;G protein-coupled receptor kinase 5;G protein-coupled receptor kinase 4	Grk6;Grk5;Grk4	0	0	-0.48	0	0	0	19
5480	Q4AE70;A0A068FP44;Q4AE70-3;Q4AE70-4;Q4AE70-2	Histone-arginine methyltransferase CARM1	Carm1;CARM1	0	0	-0.27	0	0	0.18	14		80	A0A0A0MXZ0;Q80W96	Iron-sulfur cluster assembly 1 homolog, mitochondrial	Isca1	0	0	-0.46	0	0	0	19
5481	Q4AEF8;A0A0G2K1F3	Coatomer subunit gamma-1	Copg1	0	0	0	0	0	0.69	5		85	A0A0A0MY16;Q1WIM2-2;Q1WIM2;A0A0G2K5U6	Cell adhesion molecule 2	Cadm2	0	0	-0.32	0	0	0	19
5483	Q4FZS2;D4A567;Q7TP72		Bub3	0	0	0.15	0	0	0	25		889	R9PXU6;A0A0G2K8V2;P85972	Vinculin	Vcl	0	-0.11	-0.29	0	0.11	0	19
5485	Q4FZT2	Protein phosphatase methylesterase 1	Ppme1	0	-0.2	-0.1	0	0.28	0.32	22		974	A0A0G2KAM3;P49432	Pyruvate dehydrogenase E1 component subunit beta, mitochondrial	Pdhb	0	0	-0.3	0	0	-0.12	19
1288	B0BN93	26S proteasome non-ATPase regulatory subunit 13	Psmd13	0	-0.11	0	0	0.18	0.39	22		977	A0A0G2KAS7;G3V846;P24942;A0A0G2K611;A0A0G2JSU1;P24942-2	Amino acid transporter;Excitatory amino acid transporter 1	Slc1a3	0	0	-0.34	0.12	0	0	19
5490	Q4FZY0	EF-hand domain-containing protein D2	Efhd2	0	0.17	0.18	0	0	0	25		1003	Q7TMC7;A0A0G2QC06;Q7TP24;P12346;Q4FZX7	Serotransferrin;Signal recognition particle receptor subunit beta	Tf;Srprb	0	-0.3	0	0	-0.29	0	20
5497	Q4G061	Eukaryotic translation initiation factor 3 subunit B	Eif3b	0	0	0	0	0	0.25	32		1057	A0A0H2UHS7;P12001;Q0QEW8	60S ribosomal protein L18	Rpl18	0	-0.25	0	-0.16	-0.25	0	20
5499	Q4G064	2-methoxy-6-polyprenyl-1,4-benzoquinol methylase, mitochondrial	Coq5	-0.29	0	0	0	0	0	13		1061	A0A0H2UHT6;D3ZM33;P62271;M0R5K9;A0A0G2KA79;D3ZAU6;D4AA93	40S ribosomal protein S18	LOC100362298;Rps18;LOC100912024;RGD1561919;RGD1565912	0	-0.22	0	-0.2	-0.24	0	20
5507	Q4KLF8;A0A0G2K585;A0A0U1RRQ2	Actin-related protein 2/3 complex subunit 5	Arpc5	0	-0.45	-0.16	0	0	0	36		1071	X1WI37;A0A0H2UHX3;P62703	40S ribosomal protein S4, X isoform	LOC100362640;Rps4x	0	-0.25	0.11	0	-0.35	0	20
4114	G3V8P3;Q80Z62;Q9QYP2	Cadherin EGF LAG seven-pass G-type receptor 2	Celsr2	-0.47	0	0	0	0	0	26		1294	B0BNA7;M0RCH0	Eukaryotic translation initiation factor 3 subunit I	Eif3i	0	-0.21	0	-0.18	-0.21	0	20
5515	Q4KLI7;A0A0G2K2X3;Q6TUF1		Sf3a3	0	-0.18	0	0	0	0.29	15		1359	Q5XFV9;B0K038;Q6P3E1;P62250;M0R4I3;M0R8S7;A0A1W2Q631	40S ribosomal protein S16	Rps16;RGD1561137;LOC102548369	0	-0.27	0	-0.14	-0.35	0	20
3839	F7EPH4;Q499R7;A0A0G2JUD2		Ppa1	0	0	0	0	0.18	0.22	17		1690	B5DEL9;P62083	40S ribosomal protein S7	Rps7	0	-0.17	0	-0.2	-0.28	0	20
5520	Q4KLL0	Transcription elongation factor A protein 1	Tcea1	0	0	0	0	0.44	0	34		1750	B5DFC8	Eukaryotic translation initiation factor 3 subunit C	Eif3c	-0.24	-0.17	-0.12	-0.16	-0.26	0	20
5524	Q4KLZ3		Dazap1	0	0	0	0	0	0.18	32		2073	D3ZF86		Arfgef3	-0.19	-0.3	0	0	-0.22	0	20
3742	F1M8A4		Ppfia2	0	-0.21	0	0	0	0	29		212	A0A0G2JUB0;Q810F4	Protein FAM3C	Fam3c	0	-0.27	-0.18	-0.27	-0.21	0	20
3205	D4AE56		Ptges2	0	-0.21	0	0	0	0	29		2364	D3ZQ59;P47245-2;G3V700;P47245	Nardilysin	Nrd1	0	-0.33	-0.17	0	-0.21	0	20
4371	M0RD40		Sik3	0	-0.21	0	0	0	0	29		2502	D3ZUD8		Tm9sf3	0	-0.29	0	0	-0.4	0	20
5535	Q4KM71;A0A0G2K8K0;O54725		Sfpq	-0.38	-0.11	0	0	0	0.13	13		2943	D4A6G6;P17074;A0A0H2UI38;F1M8C7;F1M764;D3ZGN8;F1LYF3;D3ZUD7;D3ZSH6	40S ribosomal protein S19	LOC100362339;Rps19;Rps19l1;LOC687298;LOC100360843	0	-0.29	0	-0.26	-0.3	-0.24	20
5536	Q4KM74	Vesicle-trafficking protein SEC22b	Sec22b	0	0	0	0	0.13	0	10		2973	D4A781;M0RB74		Ipo5	-0.18	-0.26	-0.14	0	-0.2	0	20
5537	Q4KM77	Etoposide-induced protein 2.4 homolog	Ei24	-0.3	0	0	0	0	0	13		3032	D4A8T3		Copz1	0	-0.32	-0.18	0	-0.27	0	20
4798	P25113;F1M1Y1;P16290	Phosphoglycerate mutase 1;Phosphoglycerate mutase 2	Pgam1;Pgam2	-0.15	-0.2	-0.15	0	0	0	20		3099	D4AB03		Fam120a	0	-0.18	-0.24	-0.18	-0.29	0	20
5543	Q4KSH6;F1LP57;S4VP54		Map2k4	-0.27	-0.39	-0.16	0	0	0.3	37		3470	F1LS86;A0A0G2JVL8;Q5BJR3;A0A0G2JZH2		Iars	-0.13	-0.32	-0.12	-0.1	-0.16	0.2	20
4579	Q6P7A7;P07153	Dolichyl-diphosphooligosaccharide--protein glycosyltransferase subunit 1	Rpn1	-0.19	0	0	0.14	0.31	0.31	16		3554	F1LWE6		Msi2	0	-0.26	-0.15	0	-0.25	0	20
5556	Q4QQV4		Hars	0	0	0	0	0	0.28	32		3728	F1M7W0;D3ZCV9;D3ZBZ7;P54757-5;P54757-4;P54757-3;P54757-2;P54757	Receptor protein-tyrosine kinase;Ephrin type-A receptor 5	Epha5	0	-0.34	0	0	-0.32	0	20
5559	Q4QQW8;B1WBP6	Putative phospholipase B-like 2	Plbd2	0	0	0.14	0	0	0.38	1		3922	G3V6I9;D4A1Z2;D4AE42;P12749;D3ZSF2	60S ribosomal protein L26	Rpl26;Rpl26-ps2;Rpl26-ps1;LOC688981	-0.2	-0.2	0	0	-0.21	0	20
5562	Q7TPI7;Q4QR85	Methylosome protein 50	LOC100911453;Wdr77	0	-0.3	-0.2	0	0	0.17	4		3951	G3V6T1;B5DFK1	Coatomer subunit alpha	Copa	0	-0.28	0	-0.17	-0.49	0	20
5565	Q4QRB4	Tubulin beta-3 chain	Tubb3	0	0	-0.15	0	0	0	28		4005	G3V7G9	Eukaryotic translation initiation factor 3 subunit L	Eif3l	0	-0.17	-0.11	-0.21	-0.22	0	20
5568	Q4V7A0;A0A0G2K648	WD repeat-containing protein 61;WD repeat-containing protein 61, N-terminally processed	Wdr61	0	-0.16	0	0	0.18	0	10		4028	G3V7N0;Q5BJX3		Hs2st1	0	-0.34	0	-0.36	-0.58	0	20
4680	P13084;P13084-2;D3ZXI2;D3ZP59	Nucleophosmin	Npm1	0	0	0	0.09	0.22	0.39	17		4119	G3V8Q1;B1WBX7;A0A0U1RRT4		Cope	0	-0.19	-0.15	-0.17	-0.42	0	20
5576	Q4V7D2	Protein rogdi homolog	Rogdi	0	-0.41	-0.28	0	0	0	33		4177	G3V9D3;F1LQ92;Q80Z70;Q925P0	Protein sel-1 homolog 1	Sel1l	0	-0.29	0	0	-0.22	0	20
5580	Q4V7D7	Pre-mRNA-splicing factor RBM22	Rbm22	0	0	-0.17	0	0	0	28		4372	M0RD75;P62755	40S ribosomal protein S6	Rps6	-0.25	-0.14	0	-0.18	-0.23	0	20
5581	Q4V7D9		Smpdl3b	0	-0.65	-0.53	0.19	0	0	2		4574	P06761	78 kDa glucose-regulated protein	Hspa5	-0.22	-0.27	-0.22	-0.12	-0.21	0	20
5584	Q4V7F2	Cysteine-rich with EGF-like domain protein 1	Creld1	-0.39	-0.19	0	0	0	0.17	37		4616	P09895;D3ZHP8	60S ribosomal protein L5	Rpl5;Rpl5l1	0	-0.13	0	-0.15	-0.26	0	20
6242	Q63396	Activated RNA polymerase II transcriptional coactivator p15	Sub1	0	-0.21	0	0	0	0	29		4731	P18395	Cold shock domain-containing protein E1	Csde1	-0.17	-0.25	0.09	-0.16	-0.29	0	20
5592	Q4V896	Sorting nexin-15	Snx15	0	0	0	0	0	0.34	1		4770	P21531;A0A0U1RRY5	60S ribosomal protein L3	Rpl3	-0.23	-0.19	0	0	-0.21	0.13	20
5594	Q4V898	RNA-binding motif protein, X chromosome;RNA-binding motif protein, X chromosome, N-terminally processed	Rbmx	0	0	-0.17	0	-0.1	-0.12	28		4784	P23514	Coatomer subunit beta	Copb1	0	-0.29	-0.11	-0.19	-0.43	0	20
5600	Q4V8B7	Inactive hydroxysteroid dehydrogenase-like protein 1	Hsdl1	0	0	-0.22	0	0	0	28		4886	P38983	40S ribosomal protein SA	Rpsa	-0.22	-0.15	0	-0.18	-0.33	-0.17	20
6136	Q5XIN4;Q8K3W5		Mtmr9	-0.53	-0.26	0	0	0.47	0	19		5070	P62718;F1M0K6	60S ribosomal protein L18a	Rpl18a;RGD1565566	0	-0.19	0	-0.14	-0.33	0	20
457	A0A0G2JZI2;Q6TXE9;Q5I0H2		Eprs	0	0	0	0.08	0.17	0.36	17		5293	Q07984	Translocon-associated protein subunit delta	Ssr4	0	-0.32	0	0	-0.17	0	20
5610	Q4V8F9	Hydroxysteroid dehydrogenase-like protein 2	Hsdl2	-0.27	0	0	0	0	0	13		5330	Q1JU68;Q4G020	Eukaryotic translation initiation factor 3 subunit A	Eif3a	-0.12	-0.11	-0.08	-0.19	-0.31	0	20
5611	Q4V8H2;F1LQN9;A0A0G2JYT4		Exoc1	0	0	-0.17	0	0	0	28		5380	Q3B7U9	Peptidyl-prolyl cis-trans isomerase FKBP8	Fkbp8	0	-0.19	-0.19	0	-0.24	0	20
5618	Q4V8J6		Ythdf1	-0.3	0	0	0	0	0	13		5883	Q5PPJ6		Lars	0	-0.19	0	0	-0.19	0.16	20
5619	Q4V8K2	Beta-catenin-like protein 1	Ctnnbl1	0	0	0	0	0.32	0	34		6004	Q5U2U7	mRNA cap guanine-N7 methyltransferase	Rnmt	0	-0.3	0	0	-0.29	0	20
562	A0A0G2K1H2;P22831	Synaptoporin	Synpr	0	0	-0.37	0	0	0	14		6305	Q641Y0	Dolichyl-diphosphooligosaccharide--protein glycosyltransferase 48 kDa subunit	Ddost	0	-0.24	0	0	-0.17	0.13	20
1583	B2RZ08		Tmem263	0	-0.21	0	0	0	0	29		6476	Q6AY21		G3bp2	0	-0.19	-0.2	-0.24	-0.27	0	20
6239_m	Q63372;Q63372-1;Q63372-3;Q63372-4;Q63372-5;Q63372-6;Q63372-7;Q63372-8;Q63372-9;Q63372-10;Q63372-11;Q63372-12;Q63372-13;Q63373;Q63373-2;Q63373-3;Q63373-4;M0RBN6;A0A0U1RRR4	Neurexin-1;Neurexin-1-beta	Nrxn1	-0.49	-0.4	-0.11	0	0	0	27		6557	Q6AYT3	tRNA-splicing ligase RtcB homolog	Rtcb	0	-0.25	0	0	-0.18	0	20
5631	Q505J8	Phenylalanine--tRNA ligase alpha subunit	Farsa	0	0	0	0	0	0.45	1		6699	Q6PDV7;D4A1P2	60S ribosomal protein L10	Rpl10;Rpl10l	0	-0.19	0	-0.16	-0.38	0	20
5632	Q52KJ9		Tmx1	0	0	-0.14	0	0.46	0	34		83	A0A0A0MY09;Q66HD0;A0A0G2K4I4;Q66HD0-2	Endoplasmin	Hsp90b1	0	-0.26	-0.16	0	-0.19	0	20
4155	G3V927;P97839	Disks large-associated protein 4	Dlgap4	-0.47	-0.51	0	0	0	0	27		846	A0A0G2K7W6;P18445;D4AAY6;D3ZG03;D3ZI60	60S ribosomal protein L27a	Rpl27a;RGD1559972;RGD1565415;RGD1561984	0	-0.36	0	-0.11	-0.27	0	20
4836	P31399	ATP synthase subunit d, mitochondrial	Atp5h	-0.23	-0.25	-0.19	0	0	0	20		4974	P54287	Voltage-dependent L-type calcium channel subunit beta-3	Cacnb3	0	0	0.32	0	0.37	0	21
5647	Q566C7	Diphosphoinositol polyphosphate phosphohydrolase 1	Nudt3	0	0	0	0	0.24	0	10		2430	D3ZSL2;Q5FVK7		Abracl	0	0	0.38	0	0.3	0	21
5650	Q566E4;Q811S1		Hnrnpr	-0.35	-0.23	0	0	0	0.23	37		260	D4A1Y0;A0A0G2JVC2		Scyl2	0	0	0.32	0	0.3	0	21
5657	Q568Y7;Q568Y7-2	Noelin-2	Olfm2	0	0	0	0	0	0.71	5		1733	B5DF65		Blvrb	0	0	0.26	0	0.28	0.29	21
5659	Q568Z4	Signal peptidase complex subunit 3	Spcs3	0	0	-0.16	0	0	0.2	32		2373	D3ZQG6;D3ZM62;A0A0G2K2M8	Tripartite motif-containing protein 2	Trim2	0	0	0.28	0.16	0.28	0.2	21
4636	P0DMW1;P0DMW0	Heat shock 70 kDa protein 1B;Heat shock 70 kDa protein 1A	Hspa1a	0	-0.32	-0.27	0	0.2	0.27	24		908	A0A0G2K9C5;A1L1I3;Q3MUI2	Numb-like protein	Numbl	0	0	0.46	0	0.28	0	21
5665	Q569C9;Q9ERE4	Golgi phosphoprotein 3	Golph3	-0.31	-0.2	0	0	0	0	6		1664	B4F7C7		Hebp1	0	0	0.13	0	0.27	0.2	21
7025	Q9JHW5	Vesicle-associated membrane protein 7	Vamp7	0	-0.21	0	0	0	0	29		2162	D3ZHY9		Rasal1	0	0	0.27	0	0.27	0.17	21
5675	Q58FK9;F1M572	Kynurenine--oxoglutarate transaminase 3	Ccbl2	-0.23	0	-0.12	0	0	0	13		2561	D3ZW08	Adenylosuccinate lyase	Adsl	0	0	0.36	0	0.27	0.28	21
4553	P04762	Catalase	Cat	0	0	-0.3	0.16	0.35	0.31	17		7023	Q9JHU0;Q9JMG8;A0A0G2K8Y5	Dihydropyrimidinase-related protein 5	Dpysl5	0	0.15	0.41	0.15	0.27	0.22	21
5690	Q5BJS0;A0A0G2JW51	Putative ATP-dependent RNA helicase DHX30	Dhx30	0	0	0	0	0	0.43	1		4194	G3V9P0;Q9WTV5	26S proteasome non-ATPase regulatory subunit 9	Psmd9	0	0	0.19	0	0.26	0	21
5697	Q5BJT9;P25809;A0A0G2JVQ1;B0BNC0;P09605	Creatine kinase U-type, mitochondrial;Creatine kinase S-type, mitochondrial	Ckmt1b;Ckmt1;Ckmt2	0	-0.4	-0.26	0	0	-0.08	4		6792	Q7M767;A0A0G2JU07	Ubiquitin-conjugating enzyme E2 variant 2	Ube2v2	0	0	0.27	0.12	0.26	0.25	21
5700	Q5BJU7	Wiskott-Aldrich syndrome protein family member 1	Wasf1	0	-0.61	-0.45	0	0	0	2		845	A0A0G2K7W4;A0A097PIG6		Map4k4	0	0	0.31	0	0.26	0	21
5715	Q6F6B2;Q5BK33		LOC652956	-0.22	0	0	0	0	0	13		97	A0A0F7RQJ6;P80254;A0A1W2Q637	D-dopachrome decarboxylase	Ddt	0	0	0.23	0.13	0.26	0.26	21
5716	Q5BK47	Oxysterol-binding protein	Osbpl2	0	0	0	0	0	0.12	32		2565	D3ZW55	Inosine triphosphate pyrophosphatase	Itpa	0	0	0.15	0	0.25	0.2	21
915	A0A0G2K9F2			0	-0.21	0	0	0	0	29		2681	D3ZZB0		Dip2c	0	0	0.15	0.21	0.25	0	21
5726	Q5D023;Q62698;A0A096MIY2;O35109;O35108;Q76N43;O35110;A0A096MKA1;A0A096MIX4	Cytoplasmic dynein 1 light intermediate chain 2	Dync1li2	0	-0.28	0	0.1	0.26	0	10		3545	F1LVX2		Ehbp1	0	0	0.38	0	0.25	0	21
2913	F1LYK3;D4A5I4;F1M031		Nav1	-0.51	-0.31	-0.15	0	0.31	0	19		1918	D3ZAP9	Glycerol-3-phosphate dehydrogenase [NAD(+)]	Gpd1l	0	0	0.26	0	0.24	0	21
5741	Q5EBC3;G3V6S5;P27653	C-1-tetrahydrofolate synthase, cytoplasmic;Methylenetetrahydrofolate dehydrogenase;Methenyltetrahydrofolate cyclohydrolase;Formyltetrahydrofolate synthetase;C-1-tetrahydrofolate synthase, cytoplasmic, N-terminally processed	Mthfd1	0	0	0	0	0	0.23	32		4359	M0RC57		Smap1	0	0	0.35	0	0.24	0	21
575	A0A0G2K1P1;D3ZTB0		Mtmr7	0	0	0	0	0	0.57	5		4476	O70196;A0A0G2K1M8	Prolyl endopeptidase	Prep	0	0	0.31	0	0.24	0.23	21
5754	Q5FVI6	V-type proton ATPase subunit C 1	Atp6v1c1	-0.2	-0.42	-0.2	0.06	0.1	0	9		5822	Q5M7A7;A0A0G2K1I5	CB1 cannabinoid receptor-interacting protein 1	Cnrip1	0	0	0.19	0	0.24	0.18	21
5755	Q5FVJ0;Q5FVJ0-2;A0A0G2K6A9	Protein RUFY3	Rufy3	-0.36	-0.32	0	0.17	0.25	0.42	16		6207	Q62950	Dihydropyrimidinase-related protein 1	Crmp1	0	0	0.21	0.14	0.24	0.19	21
3618	F1M0J7		Prickle2	-0.22	-0.32	-0.19	0	0.35	0	19		3830	F2Z3T7;Q6I7R3	Isochorismatase domain-containing protein 1	Isoc1	0	0	0.3	0.16	0.23	0.22	21
6210	Q62991	Sec1 family domain-containing protein 1	Scfd1	-0.35	0	0	0	0.2	0.28	16		4512	Q9QUI9;O88768;A0A0G2K7U5;Q63629;D3ZQG5;Q9JK15	Arf-GAP with dual PH domain-containing protein 2	Adap1;Adap2	0	0	0.27	0	0.23	0.22	21
453	A0A0G2JZH0;D3ZJ77		Cab39	0	-0.2	0	0	0	0	29		4938	P50398	Rab GDP dissociation inhibitor alpha	Gdi1	0	0	0.15	0.15	0.23	0	21
5769	Q5FVN0	Lysophospholipid acyltransferase 5	Lpcat3	0	0	0	0	0	0.23	32		5744	Q5EGY4	Synaptobrevin homolog YKT6	Ykt6	0	0	0.34	0	0.23	0.27	21
611	A0A0G2K2L8;Q62915;O35807	Peripheral plasma membrane protein CASK	Cask;mdg2	0	-0.2	0	0	0	0	29		5921	Q5RJK6		Inpp1	0	0	0.17	0	0.23	0	21
5782	Q5FWU3	Autophagy-related protein 9A	Atg9a	0	-0.21	-0.19	0	0.2	0	4		6948	Q925Q9;M0RBZ7;Q6IRL5;A0A0H2UHD8;Q925Q9-2;Q925Q9-7;Q925Q9-3;Q925Q9-6;Q925Q9-4;F1LRS8	SH3 domain-containing kinase-binding protein 1;CD2-associated protein	Sh3kbp1;Cd2ap	0	0	0.22	0	0.23	0	21
5783	Q5FWY5	AH receptor-interacting protein	Aip	-0.37	0	0	0	0	0	13		1947	D3ZBL5;Q62784-2;Q62784	Type I inositol 3,4-bisphosphate 4-phosphatase	Inpp4a	0	0	0.34	0	0.22	0	21
5784	Q5GFD9	Protein IMPACT	Impact	0	0	-0.29	0	0.33	0	34		3702	F1M6P8		Edil3	0	0	0.31	0	0.22	0	21
5221	P97633;A0JPL2;P97633-2;D3ZRE3	Casein kinase I isoform alpha	Csnk1a1	0	-0.2	0	0	0	0	29		5122	P63100;P63100-2;A0A0H2UHV6;A0A0G2K4H3;P28470	Calcineurin subunit B type 1;Calcineurin subunit B type 2	Ppp3r1;Ppp3r2	0	0	0.19	0	0.22	0.2	21
4881	P37377;P37377-2	Alpha-synuclein	Snca	-0.31	-0.21	-0.12	0	0	0	20		5716	Q5BK47	Oxysterol-binding protein	Osbpl2	0	0	0.42	0	0.22	0	21
5791	Q5HZE0	Mitochondrial basic amino acids transporter	Slc25a29	0	0	-0.34	0	0	0	14		6287	Q63768;Q63768-2	Adapter molecule crk	Crk	0	0	0.21	0	0.22	0.25	21
4106	G3V8K2;O35356	Guanine nucleotide-binding protein subunit gamma	Gng3	0	-0.2	0	0	0	0	29		433	A0A0G2JZ60			0	0	0.43	0	0.21	0	21
4658	P11497-2;P11497;D3ZRA3;A0A0G2K5G8	Acetyl-CoA carboxylase 1;Biotin carboxylase	Acaca	-0.18	-0.31	-0.2	0	0.22	0.3	24		5197	P85845;Q80X10	Fascin	Fscn1	0	0	0.25	0	0.21	0.26	21
5795	Q5HZW3	Aspartate beta-hydroxylase domain-containing protein 2	Asphd2	0	-0.63	-0.47	0	0	0	2		5471	Q499P2;P30349	Leukotriene A(4) hydrolase;Leukotriene A-4 hydrolase	Lta4h	0	0	0.18	0	0.21	0.16	21
5798	Q5HZY2	GTP-binding protein SAR1b	Sar1b	0	0	0	0	0.5	0	34		90_m	P39052;P39052-2;P39052-3;P39052-4;A0A0A0MY48;A0A0A0MY49	Dynamin-2	Dnm2	0	0.17	0.18	0	0.21	0.22	21
3265	E9PTB7;A0A0G2JXZ9;Q62884	Protein-tyrosine-phosphatase	Ptprj	-0.42	-0.22	0	0	0.32	0	19		3781	F1M9V7;Q3B8Q9;Q8VID2		Npepps	0	0	0.22	0.12	0.2	0	21
5807	Q5I0E7	Transmembrane emp24 domain-containing protein 9	Tmed9	0	0	0	0	0	0.46	1		4417	O35179	Endophilin-A1	Sh3gl2	0	0	0.16	0	0.2	0	21
5808	Q5I0F0		Drg1	-0.4	0	0	0	0	0	13		4755	P19804	Nucleoside diphosphate kinase B	Nme2	0	0	0.24	0	0.2	0	21
5821	Q5M7A4	Ubiquitin-like modifier-activating enzyme 5	Uba5	0	0	0	0	0	0.29	32		6149	Q5XIT1	Microtubule-associated protein RP/EB family member 3	Mapre3	0	0	0.31	0.09	0.2	0.15	21
5822	Q5M7A7;A0A0G2K1I5	CB1 cannabinoid receptor-interacting protein 1	Cnrip1	0	0	0	0	0.06	0	25		5565	Q4QRB4	Tubulin beta-3 chain	Tubb3	0	0	0.32	0.12	0.19	0	21
5824	Q5M7T2	SPRY domain-containing protein 7	Spryd7	0	0	0	0	0	0.27	32		7127	Q9WU70-2;Q9WU70;Q9WU70-3	Syntaxin-binding protein 5	Stxbp5	0	0	0.14	0	0.19	0.14	21
5825	Q5M7T4	Protein YIPF4	Yipf4	0	0	0	0.33	0	0	25		2723	D4A0A1		Soga3	0	0	0.22	0	0.18	0	21
4921	P47942	Dihydropyrimidinase-related protein 2	Dpysl2	-0.19	-0.2	-0.1	0	0	0	20		4471	O55173	3-phosphoinositide-dependent protein kinase 1	Pdpk1	0	0	0.21	0	0.18	0	21
5827	Q5M7T7		Pla2g7	0	0	0	0	0	0.36	1		5295	Q08163	Adenylyl cyclase-associated protein 1	Cap1	0	0	0.23	0	0.18	0.13	21
4976	P54313;Q45QL6;Q91XL4	Guanine nucleotide-binding protein G(I)/G(S)/G(T) subunit beta-2	Gnb2	-0.28	-0.23	-0.13	0	0	0	20		6336	Q64559-1;F8WG67;Q64559	Cytosolic acyl coenzyme A thioester hydrolase	Acot7	0	0	0.33	0	0.18	0	21
5736	Q5EB77	Ras-related protein Rab-18	Rab18	-0.23	0	-0.15	0.17	0.25	0	19		1753	B5DFE0;A0A0G2K4N7		Mpp6	0	0	0.17	0.1	0.16	0.17	21
5832	Q5M7W7	Probable proline--tRNA ligase, mitochondrial	Pars2	0	0	0	0	0.23	0	10		201	A0A0G2JU11;F1M386;A0A0A0MP77	Rap guanine nucleotide exchange factor 2	Rapgef2	0	0	0.44	0	0.16	0	21
5837	Q5M823	NudC domain-containing protein 2	Nudcd2	0	0	0	0	0	0.27	32		4881	P37377;P37377-2	Alpha-synuclein	Snca	0	0	0.24	0.1	0.16	0	21
584	A0A0G2K1W1			-0.32	0	0	0	0	0	13		6854	Q8CF97	Deubiquitinating protein VCIP135	Vcpip1	0	0	0.26	0	0.16	0	21
5846	Q5M887	Trafficking protein particle complex subunit 13	Trappc13	0	0	0	0	0.23	0	10		1149	A0A1L5YJQ7;A0A0G2QC41;D3ZVD8		Hdac6	0	0	0.25	0	0.15	0	21
5848	Q5M918;F7EQ81;Q32KJ5		Gns	0	0	0.19	0	0	0.37	1		3231	D4AEP0	Adenylosuccinate synthetase isozyme 2	Adss	0	0	0.19	0	0.15	0.28	21
5853	Q5M960;Q62813;Q62813-2;A0A0H2UHY3;A0A0H2UHW7	Limbic system-associated membrane protein	Lsamp	0	-0.28	-0.2	0.17	0	0	4		4697	P14562;A0A0U1RRS9	Lysosome-associated membrane glycoprotein 1	Lamp1	0.17	0	0.28	0	0.15	0.26	21
5854	Q5M963;P69060	N-acylneuraminate cytidylyltransferase	Cmas	0	-0.31	0.19	0.25	0.32	0.48	22		6221	Q63092;A0A0G2K1R5	CaM kinase-like vesicle-associated protein	Camkv	0	0	0.13	0	0.15	0.12	21
5857	Q5M971	Protein AF1q	Mllt11	0	0	0	0	0.41	0	34		6599	Q8VIN2;Q6IRJ7	Annexin	Anxa7	0	0	0.26	0	0.15	0	21
5861	Q5M9F7		Actr10	0	-0.18	0	0	0.2	0.31	22		1001	Q52KS1;A0A0G2KBC7;P47858;Q9Z1I3	ATP-dependent 6-phosphofructokinase;ATP-dependent 6-phosphofructokinase, muscle type	Pfkm	0	0	0.25	0	0.14	0.2	21
4177	G3V9D3;F1LQ92;Q80Z70;Q925P0	Protein sel-1 homolog 1	Sel1l	-0.33	0	0	0.17	0.31	0.27	16		1278	B0BN63		Ahsa1	0	0	0.24	0	0.14	0.19	21
5869	Q5M9I5	Cytochrome b-c1 complex subunit 6, mitochondrial	Uqcrh	0	0	-0.18	0	0	0	28		7041	Q9JJ31;A0A0H2UHG3	Cullin-5	Cul5	0	0.13	0.23	0.14	0.13	0.21	21
5134	P63319	Protein kinase C gamma type	Prkcg	-0.2	-0.75	-0.16	0.13	0.17	0.27	21		3514	F1LU48		Ergic1	0	-0.45	0	0	-0.28	0	22
6264	Q63570	26S protease regulatory subunit 6B	Psmc4	0	0	0	0	0.14	0.36	17		3955	G3V6U9;D4A7S1;Q5FWY6		LOC100910833;Setd3	0	-0.51	0	0	-0.47	0	22
5876	Q5PPH0	Enolase-phosphatase E1	Enoph1	0	-0.47	-0.3	0	0	0	33		4130	G3V8T3;P55266	Double-stranded RNA-specific adenosine deaminase	Adar	-0.24	-0.45	0	0	-0.34	0	22
4295	M0R809;O35357	Guanine nucleotide-binding protein subunit gamma	Gng4	0	-0.2	0	0	0	0	29		4431	O35394	Prenylated Rab acceptor protein 1	Rabac1	0	-0.43	0	0	-0.54	0	22
5882	Q5PPJ4	Deoxyhypusine hydroxylase	Dohh	0	0	0	0	0.49	0	34		4436	O35547	Long-chain-fatty-acid--CoA ligase 4	Acsl4	-0.34	-0.62	-0.22	-0.21	-0.26	0	22
3958	G3V6W6;Q32PW9		Psmc6	0	0	0	0	0.22	0.37	17		4613	P09606	Glutamine synthetase	Glul	0	-0.48	-0.14	0	-0.45	0	22
5884	Q5PPJ9;A0A0G2K9P4;D4A7V1	Endophilin-B2	Sh3glb2	0	-0.61	-0.35	0	0	0	33		4958	P52020;Q8CJ80	Squalene monooxygenase	Sqle	-0.34	-0.51	0	0	-0.42	0	22
2561	D3ZW08	Adenylosuccinate lyase	Adsl	0	-0.3	-0.23	0.13	0.2	0.22	24		4962	P52631	Signal transducer and activator of transcription 3	Stat3	-0.28	-0.51	0	0	-0.39	0	22
5888	Q5PQJ6	Pyrroline-5-carboxylate reductase 3	Pycrl	0	0	0	0	0	0.13	32		5200	P85973	Purine nucleoside phosphorylase	Pnp	0	-0.42	0	0	-0.33	0	22
5890	Q5PQK2		Fus	-0.33	0	0	0	0	0	13		5549	Q4QQT3	CUGBP Elav-like family member 1	Celf1	-0.26	-0.29	-0.17	0	-0.42	0	22
5893	Q5PQL7	Integral membrane protein 2C;CT-BRI3	Itm2c	-0.2	-0.21	-0.17	0	0	0.28	37		5768	Q5FVM7	DnaJ homolog subfamily C member 16	Dnajc16	0	-0.53	0	0	-0.52	0	22
5094	Q3ZB97;P62944;P62944-2	AP complex subunit beta;AP-2 complex subunit beta	Ap2b1	-0.25	-0.28	-0.2	0	0	0	20		921	G3V7K3;A0A0G2K9I6;P13635;Q9JL97	Ceruloplasmin	Cp	0	-0.49	0	0	-0.26	0	22
5911	Q5PQV5	Trophoblast glycoprotein	Tpbg	0	0.13	-0.34	0	0	0	14		1994	D3ZCV0		Actn2	-0.39	-0.74	-1.03	0	0	-0.55	23
5913	Q5PQX0	UDP-glucuronic acid decarboxylase 1	Uxs1	0	0	0	0	0	0.39	1		6884	Q8K4Y5	Leucine-rich glioma-inactivated protein 1	Lgi1	-0.65	-0.83	-0.94	0	0	0	23
5915	Q5PQZ9	NADH dehydrogenase [ubiquinone] 1 subunit C2	Ndufc2	0	0	-0.19	0	0	0	28		4960	P52481	Adenylyl cyclase-associated protein 2	Cap2	-0.38	-0.88	-0.97	0	0.06	0	23
5921	Q5RJK6		Inpp1	0	-0.43	-0.47	0	0	0	33		4722	P17105	Inositol-trisphosphate 3-kinase A	Itpka	-0.61	-0.83	-0.73	0	0	0	23
5925	Q5RJN0		Ndufs7	0	-0.19	-0.17	0	0.07	0	4		4580	P07171	Calbindin	Calb1	-0.46	-0.93	-0.83	0	0	0	23
5929	Q5RJR8;A0A0G2K6J3	Leucine-rich repeat-containing protein 59	Lrrc59	0	0	0	0.1	0	0	25		5885	Q5PPL3	Sterol-4-alpha-carboxylate 3-dehydrogenase, decarboxylating	Nsdhl	-0.46	-1	-0.7	0	0	0	23
5930	Q5RJR9;P29457	Serpin H1	Serpinh1	-0.11	0	0	0.11	0.12	0	10		6591	Q6IMZ5;P70567	Tropomodulin-1	Tmod1	-0.46	-1.02	-1.12	0	0	0	23
5937	Q5RK08		Gbas	0	0	-0.1	0	0	0	28		3364	F1LPA3;Q76M68	IQ motif and SEC7 domain-containing protein 3	Iqsec3	-0.44	-0.78	-0.74	0	0	0	23
5939	Q5RK10;P35427;A0A1W2Q6L2	60S ribosomal protein L13a	Rpl13a	0	0	0	0	0	0.29	32		5074	P62762;Q56A29	Visinin-like protein 1	Vsnl1	-0.4	-0.78	-1.07	0	0	0	23
594	A0A0G2K249;Q5RKH1	Serine/threonine-protein kinase PRP4 homolog	Prpf4b	-0.5	-0.29	-0.19	0	0	0.51	37		3555	F1LWG2		Prmt8	-0.38	-0.79	-0.61	0	0	0	23
5944	Q5RK25	Phosphomannomutase	Pmm1	-0.25	0	0	0	0	0	13		4125	G3V8R2;P55067;A0A0G2K4R4;O70474	Neurocan core protein;150 kDa adult core glycoprotein	Ncan	-0.3	-0.71	-0.97	0	0	0	23
5948	Q5RKG9		Eif4b	0	-0.26	-0.21	0	0	0	4		4074	G3V856;Q5BKC9;Q6AZ62;Q9JK73	Ephexin-1	LOC100912512;Ngef	0	-1.32	-0.66	0	-0.49	0	23
5953	Q5RKH7	Solute carrier family 35 member F6	Slc35f6	0	0	0	0	0	0.28	32		5490	Q4FZY0	EF-hand domain-containing protein D2	Efhd2	-0.22	-0.74	-1.06	0	0	0	23
5955	Q5RKI0	WD repeat-containing protein 1	Wdr1	0	-0.25	-0.16	0	0	0	4		5895	Q5PQN0	Neurocalcin-delta	Ncald	0	-0.74	-0.96	0	0.12	0	23
1876	D3Z955		Pgm2l1	-0.19	-0.48	-0.21	0.48	0.51	0.47	21		3660	F1M3J7;A0A0G2K6L9		Cntnap4	0	-0.92	-1.16	0	0	0	23
5957	Q5RKI5		Flii	0	0	0	0	0.12	0.27	32		1704	B5DEX3		Cpne8	0	-0.85	-0.9	0	0	0	23
596	A0A0G2K273;Q641X8	Eukaryotic translation initiation factor 3 subunit E	Eif3e	0	0	0	0	0	0.36	1		4705	P14925;P14925-3;P14925-4;P14925-5;P14925-2;P14925-6;P14925-7	Peptidyl-glycine alpha-amidating monooxygenase;Peptidylglycine alpha-hydroxylating monooxygenase;Peptidyl-alpha-hydroxyglycine alpha-amidating lyase	Pam	-0.22	-0.74	-1.03	0.56	0	0	23
5962	Q5RKJ9;Q7TQ88;P35281	Ras-related protein Rab-10	Rab10	0	0	0	0	0	0.15	32		4384	O08557	N(G),N(G)-dimethylarginine dimethylaminohydrolase 1	Ddah1	0	-0.7	-1.1	0	0	0	23
5970	Q5U1Z2	Trafficking protein particle complex subunit 3	Trappc3	0	0	-0.23	0	0	0	28		6770	Q765A7	GPI inositol-deacylase	Pgap1	-0.47	-0.77	-0.64	-0.13	-0.25	0	23
3842	F7ESM5;Q7TQ94;Q5PQK6	Nitrilase homolog 1	Nit1	0	-0.2	0	0	0	0	29		3479	F1LSH6;Q9JKB0	Potassium/sodium hyperpolarization-activated cyclic nucleotide-gated channel 1	Hcn1	0	-0.87	-1.08	0	0	0	23
5976	Q5U211;B0BMY2	Sorting nexin-3	Snx3;LOC684097	0	-0.24	0	0.12	0.19	0.38	22		164	A0A0G2JTA7;D4AAY3		Rasal2	0	-0.92	-1.2	0	0	-0.19	23
598	Q6TXG4;A0A0G2K283		Dhx8	0	-0.46	0	0	0.1	0	36		4435	O35532	Methylsterol monooxygenase 1	Msmo1	0	-1.38	-0.98	0	0	0	23
6096	Q5XIC6		Psmd12	0	0	0	0	0.16	0.34	17		4428	O35331;G3V647;D3Z8P5	Pyridoxal kinase	Pdxk;RGD1566085	0	-0.74	-1.01	0	0	0	23
5983	Q5U2N3	Membrane-associated phosphatidylinositol transfer protein 1	Pitpnm1	0	-0.4	-0.28	0	0.12	0	33		7065	Q9JLD2	Neuroserpin	Serpini1	0	-0.94	-0.93	0	0	0	23
1420	B1WC25		Tra2a	0	-0.2	0	0	0	0	29		6833	Q80W98	Small glutamine-rich tetratricopeptide repeat-containing protein beta	Sgtb	0	-0.97	-0.69	0	0	0	23
599	A0A0G2K293;D4A2V0;Q9Z0J8	Neuronal growth regulator 1	Negr1	0	0	-0.37	0	0	0	14		6937	Q921A2	Proton myo-inositol cotransporter	Slc2a13	0	-0.75	-0.95	0	0	0	23
5990	Q5U2Q7	Eukaryotic peptide chain release factor subunit 1	Etf1	0	-0.17	0	0	0.23	0	10		5217	P97610	Synaptotagmin-12	Syt12	0	-0.75	-0.88	0	0	0	23
5994	Q5U2R7	LDLR chaperone MESD	Mesdc2	-0.29	-0.13	0	0	0	0	13		4538	P01830	Thy-1 membrane glycoprotein	Thy1	0	-0.82	-1	0	0	0	23
5487	Q4FZT9	26S proteasome non-ATPase regulatory subunit 2	Psmd2	0	-0.16	0	0	0.22	0.45	22		1082	A0A0H2UI21;Q704S8	Carnitine O-acetyltransferase	Crat	0	0	-0.36	0	0	-0.26	24
6000	Q5U2U0	ATP-dependent Clp protease ATP-binding subunit clpX-like, mitochondrial	Clpx	-0.26	0	0	0	0	0	13		1517	G3V828;B2RYF8		Cnpy3	0	-0.26	-0.22	0	0	-0.36	24
6003	Q5U2U6	Cell death-inducing p53-target protein 1	Cdip1	-0.47	0	-0.13	0	0	0	26		1559	B2RYS0;P35171	Cytochrome c oxidase subunit 7A2, mitochondrial	Cox7a2	0	0	0	0	0	-0.36	24
6004	Q5U2U7	mRNA cap guanine-N7 methyltransferase	Rnmt	0	0	0	0	0.43	0	34		1689	B5DEL8;A0A0G2JZJ9		LOC100361505	0	0	-0.25	0	0	-0.26	24
6005	Q5U2V1;A0A096MJW1		Fkbp10	0	0.25	0	0	0.25	0	12		1997	D3ZCZ9;P52504	NADH dehydrogenase [ubiquinone] iron-sulfur protein 6, mitochondrial	LOC100912599;Ndufs6	0	0	-0.3	0	0	-0.34	24
4041	G3V7T6;Q9ET34;Q5FVK4		Sf3b1	-0.21	-0.15	0	0	0.3	0	19		2101	D3ZG43		Ndufs3	0	0	-0.28	0	0	-0.2	24
5829	Q5M7V8	Thyroid hormone receptor-associated protein 3	Thrap3	-0.37	0	0	0	0.33	0	19		2256	D3ZL85		Hccs	0	0	-0.4	0	0	-0.3	24
6430	Q68FW9	COP9 signalosome complex subunit 3	Cops3	0	-0.19	0	0	0	0	29		2461	D3ZTF0		RGD1560470	0	0	0	0	0	-0.29	24
6012	Q5U2X8		Acot9	0	-0.38	-0.28	0	0	0	4		2557	D3ZVU6		Avl9	0	0	0	0	-0.35	-0.5	24
6015	Q5U300	Ubiquitin-like modifier-activating enzyme 1	Uba1	-0.14	-0.18	0	0.13	0.18	0.23	15		2665	M0RAK4;D3ZYW7;A0A0A0MXX7	Frataxin, mitochondrial;Frataxin intermediate form;Frataxin mature form	Fxn	0	0	-0.44	0	0	-0.25	24
6016	Q5U302;A0A0G2JYF7		Ctnna1	0	0.14	0	-0.14	0	0	25		275	A0A0G2JVL6;Q7TP78;F7EXQ7		Ndufa8	0	-0.19	-0.29	0	0	-0.25	24
6022	Q5U316	Ras-related protein Rab-35	Rab35	0	0	0	0	0.09	0	25		2848	D4A3V2	NADH dehydrogenase [ubiquinone] 1 alpha subcomplex subunit 6	Ndufa6	0	0	-0.24	0	0	-0.27	24
6023	Q5U318	Astrocytic phosphoprotein PEA-15	Pea15	0	0	-0.14	0	0	0	28		2876	D4A4P3;M0RA24		LOC100361144;LOC100362391	0	0	-0.21	0	0	-0.21	24
5607	Q4V8E2		Psmd14	0	0	0	0	0.23	0.36	17		3181	D4ADD7		Glrx5	0	0	-0.31	0	0	-0.38	24
4157	G3V936;Q8VHF5;Q0QEL8	Citrate synthase;Citrate synthase, mitochondrial	Cs	0	-0.19	0	0	0	0	29		3375	F1LPG5;F1M7T1;Q2XTA8;D3ZV29;D3ZQH7;F1M7Z4		LOC688963;LOC100361934;Ndufb4;Ndufb4l1;RGD1560088;LOC687864	0	0	-0.25	0	0	-0.21	24
6033	Q5U3Z7	Serine hydroxymethyltransferase	Shmt2	0.19	0	0	0	0	0	25		35	A0A096MJT6		RGD1307100	0	0	0	0	0	-0.56	24
604	D3ZC84;A0A0G2K2C7	Ubiquitin carboxyl-terminal hydrolase	Usp9x	0	-0.28	0	0	0.24	0.35	22		3518	F1LUB7;Q6RVG2-3;Q6RVG2-2;Q6RVG2	Anion exchange protein;Electroneutral sodium bicarbonate exchanger 1	Slc4a8	0	0	-0.53	-0.3	-0.53	-1.01	24
1410	B1WBY7		Erlin1	0	-0.19	0	0	0	0	29		4014	G3V7J0;Q02253	Methylmalonate-semialdehyde dehydrogenase [acylating], mitochondrial	Aldh6a1	0	0	-0.25	0	-0.15	-0.16	24
6048	Q5XHZ0	Heat shock protein 75 kDa, mitochondrial	Trap1	0	0	0	0	0.09	0	25		4142	Q3SWT2;G3V8W9		Tstd3	0	0	-0.44	0	0	-0.5	24
605	D3ZQL7;A0A0G2K2D6		Tppp	0	-0.59	-0.19	0	0	0	33		4159	G3V945;P51650;P51650-2	Succinate-semialdehyde dehydrogenase, mitochondrial	Aldh5a1	0	0	-0.31	0	0	-0.2	24
6053	Q5XI17		Tarsl2	0	0	0	0	0.37	0	34		439	A0A0G2JZA2;P97576	GrpE protein homolog 1, mitochondrial	Grpel1	0	0	-0.23	0	0	-0.25	24
6055	Q5XI21		Tom1	-0.19	0	0	0	0	0	13		4592	P07895;C8CHS6	Superoxide dismutase [Mn], mitochondrial	Sod2	0	0	-0.31	0	0	-0.22	24
6060	Q5XI31	GPI transamidase component PIG-S	Pigs	0	0	0	0	0	0.43	1		4741	P19234	NADH dehydrogenase [ubiquinone] flavoprotein 2, mitochondrial	Ndufv2	0	0	-0.23	0	0	-0.23	24
5255	Q02563	Synaptic vesicle glycoprotein 2A	Sv2a	-0.27	-0.2	-0.15	0	0	0	20		4794	P24329	Thiosulfate sulfurtransferase	Tst	0	0	-0.29	0	0	-0.34	24
6062	Q5XI34;O35511		Ppp2r1a;PP2A ARa	-0.24	-0.28	-0.12	0.06	0.16	0.25	37		4821	P29117	Peptidyl-prolyl cis-trans isomerase F, mitochondrial	Ppif	0	0	-0.2	0	0	-0.27	24
6072	Q5XI64	Monoacylglycerol lipase ABHD6	Abhd6	0	-0.42	-0.27	0	0	0	33		4944	P50554	4-aminobutyrate aminotransferase, mitochondrial;4-aminobutyrate aminotransferase, brain isoform;4-aminobutyrate aminotransferase, liver isoform	Abat	0	-0.1	-0.33	0	0	-0.27	24
5259	Q02874;A0A140TAB4;Q02874-2	Core histone macro-H2A.1	H2afy	0	-0.19	0	0	0	0	29		5084	P62859;A0A0A0MY14;F1M168	40S ribosomal protein S28	Rps28;LOC100359503;LOC100360689	0	-0.16	0	0	-0.29	-0.46	24
6079	Q5XI77;D3ZHD1	Annexin	Anxa11;Anxa13	0	-0.53	0	0	0.17	0	36		5558	Q4QQW3	Hydroxyacid-oxoacid transhydrogenase, mitochondrial	Adhfe1	0	0	0	0	0	-0.61	24
6080	Q5XI78	2-oxoglutarate dehydrogenase, mitochondrial	Ogdh	0	0	-0.18	0	0	0	28		5642	Q561S0;A0A1W2Q6F8;Q6P6W6	NADH dehydrogenase [ubiquinone] 1 alpha subcomplex subunit 10, mitochondrial	Ndufa10	0	0	-0.2	0	0	-0.22	24
6082_m	Q5XI81;A0A0G2JWD2	Fragile X mental retardation syndrome-related protein 1	Fxr1	0	0	-0.19	0	0.34	0	34		5704	Q5BJX1;D3ZH23	39S ribosomal protein L41, mitochondrial	Mrpl41;RGD1560917	0	0	0	0	0	-0.28	24
4997	P56574;A0A0G2JUF6	Isocitrate dehydrogenase [NADP], mitochondrial	Idh2	-0.27	0	-0.27	0	0	0	8		5718	Q5BK63	NADH dehydrogenase [ubiquinone] 1 alpha subcomplex subunit 9, mitochondrial	Ndufa9	0	0	-0.23	0	0	-0.23	24
6095	Q5XIC2	Evolutionarily conserved signaling intermediate in Toll pathway, mitochondrial	Ecsit	-0.22	0	0	0	0	0	13		5884	Q5PPJ9;A0A0G2K9P4;D4A7V1	Endophilin-B2	Sh3glb2	0	0	-0.34	0	0	-0.28	24
3968	G3V702;Q99M63	WD40 repeat-containing protein SMU1;WD40 repeat-containing protein SMU1, N-terminally processed	Smu1	-0.29	0	-0.11	0	0.22	0.36	16		5925	Q5RJN0		Ndufs7	0	0	-0.26	0	0	-0.32	24
6099	Q5XID7;A0A0G2KAU2	Armadillo repeat-containing X-linked protein 3	Armcx3	-0.38	-0.22	0	0	0	0	6		6118	Q5XIH3		Ndufv1	0	-0.15	-0.25	0	0	-0.21	24
61	A0A096MKH2;Q4KM55		Vta1	0	0	0	0	0.12	0	10		617	Q562C3;A0A0G2K2Q2		Gcat	0	0	0	0	-0.29	-0.47	24
2119	D3ZGN7;Q5XIM1		Mical3	0	-0.19	0	0	0	0	29		6238	Q63362	NADH dehydrogenase [ubiquinone] 1 alpha subcomplex subunit 5	Ndufa5	0	0	-0.27	0	0	-0.27	24
6103	Q5XIE6;Q5XIE6-2	3-hydroxyisobutyryl-CoA hydrolase, mitochondrial	Hibch	0	0	-0.11	0	0	0	28		6307	Q641Y2	NADH dehydrogenase [ubiquinone] iron-sulfur protein 2, mitochondrial	Ndufs2	0	0	-0.26	0	0	-0.26	24
6104	Q5XIE8	Integral membrane protein 2B;BRI2, membrane form;BRI2 intracellular domain;BRI2C, soluble form;Bri23 peptide	Itm2b	0	0	0.21	0	0	0.44	7		6381	Q66HF1	NADH-ubiquinone oxidoreductase 75 kDa subunit, mitochondrial	Ndufs1	0	-0.13	-0.28	-0.04	0	-0.23	24
6105	Q5XIF0		Tex264	0	0	0	0.35	0.41	0	34		67	Q8SEZ0;Q06QK5;Q06QG6;Q06QA1;A0A096XKT9;P11661;A7XYD5;A7XYC1;A0A0A1FZN8	NADH-ubiquinone oxidoreductase chain 5	Mt-nd5;ND5;Mtnd5;Nd5	0	0	-0.24	0	0	-0.18	24
4889	P40307	Proteasome subunit beta type-2	Psmb2	0	-0.19	0	0	0	0	29		6831	Q80W89	NADH dehydrogenase [ubiquinone] 1 alpha subcomplex subunit 11	Ndufa11	0	0	-0.24	0	0	-0.18	24
5974	Q5U205		Stard3nl	0	-0.19	0	0	0	0	29		6970	Q99P39-2;Q3MHT2;Q99P39;Q5FWU2	Cysteine desulfurase, mitochondrial	Nfs1;LOC100911034	0	0	-0.25	0	0	-0.33	24
1192	A1L108;A1L108-2	Actin-related protein 2/3 complex subunit 5-like protein	Arpc5l	-0.26	0	-0.24	0	0	0	8		1463	B2GUZ9		Fam49b	0	-0.12	-0.23	0.16	0.32	0	25
6116	Q5XIG8;M0RCV0	Serine-threonine kinase receptor-associated protein	Strap;LOC100910575	0	-0.32	0	0	0.22	0.37	22		1693	B5DEN4;P04642;Q6P9U7;H9N9H4;Q6AYX2;P19629	L-lactate dehydrogenase;L-lactate dehydrogenase A chain;L-lactate dehydrogenase C chain	Ldha;LDHC;Ldhc	-0.18	-0.4	-0.2	0.13	0.28	0.21	25
5278	Q6P9Y4;Q05962	ADP/ATP translocase 1	Slc25a4	-0.32	-0.16	-0.17	0	0	0	20		1755	B5DFF7;G3V9L3;A0A0G2K3I9		Dusp3	0	-0.4	-0.25	0	0.3	0.18	25
6124	Q5XII9	Mitochondrial fission regulator 1-like	Mtfr1l	0	0	-0.17	0	0	0	28		2528	D3ZUY8		Ap2a1	0	-0.26	-0.32	0.06	0.13	0	25
6125	Q5XIJ3;P41565	Isocitrate dehydrogenase [NAD] subunit, mitochondrial;Isocitrate dehydrogenase [NAD] subunit gamma 1, mitochondrial	Idh3g	0	-0.24	-0.22	0	0	0	4		2816	D4A304		Diras1	0	-0.22	-0.24	0	0.17	0	25
613	A0A0G2K2M9			-0.14	0	0	0	0	0	13		3113	D4ABK1		Syngr3	0	-0.27	-0.35	0	0.11	0	25
6130	Q5XIK2	Thioredoxin-related transmembrane protein 2	Tmx2	-0.34	0	0	0	0	0	13		3236	D7NIW0;F1LRN8;A0A0G2JXP3;A0A0G2JUY1;Q5U1Z5;Q6P778		Nedd4l	0	-0.26	-0.41	0	0.14	0	25
6134	Q5XIM7	Lysine--tRNA ligase	Kars	0	0	0	0	0	0.16	32		3633	F1M1D5		Tbcd	0	-0.27	-0.16	0	0.15	0.2	25
6135	Q5XIM9	T-complex protein 1 subunit beta	Cct2	-0.21	-0.17	0	0	0.11	0.25	37		3787	F1MA36;Q9QWN8	Spectrin beta chain, non-erythrocytic 2	Sptbn2	0	-0.16	-0.2	0	0.13	0	25
5102	P62997;F1LVK5	Transformer-2 protein homolog beta	Tra2b	-0.35	-0.23	0	0.11	0.38	0	19		3839	F7EPH4;Q499R7;A0A0G2JUD2		Ppa1	0	-0.35	-0.24	0	0.15	0	25
6137	Q5XIN6	LETM1 and EF-hand domain-containing protein 1, mitochondrial	Letm1	0	-0.27	-0.21	0	0	0	4		3873	F8WFM2;P85969	Beta-soluble NSF attachment protein	Napb	0	-0.27	-0.29	0	0.18	0.07	25
6139	Q5XIP0		Dnajb4	0	-0.41	-0.44	0	0	0	33		3874	F8WFS9;Q05764;Q05764-2	Beta-adducin	Add2	0	-0.22	-0.33	0	0.16	0	25
6149	Q5XIT1	Microtubule-associated protein RP/EB family member 3	Mapre3	0	-0.37	-0.16	0	0	0	4		4195_m	P51111;G3V9P7;Q6RW62		Htt	0	-0.22	-0.31	0	0.12	0	25
615	A0A0G2K2P5;F1M4A0		Tjp1	0	0.27	0.12	0	0.26	0	12		4227	M0R3N4		Vat1l	0	-0.33	-0.55	0	0.27	0.21	25
6150	Q5XIT9	Methylcrotonoyl-CoA carboxylase beta chain, mitochondrial	Mccc2	-0.25	0	-0.11	0	0	0	13		4430	O35353;Q45QL2;A0A0G2K8M9;D4A752	Guanine nucleotide-binding protein subunit beta-4	Gnb4	0	-0.15	-0.24	0	0.21	0.15	25
6154	Q5XIW0;O35093	Mitochondrial import inner membrane translocase subunit Tim23	Timm23	0	-0.11	0	0	0.26	0	10		4583	P07335	Creatine kinase B-type	Ckb	0	-0.31	-0.45	0.08	0.13	0.09	25
4373	M0RDD7;Q498T2-2;Q498T2	Chromatin target of PRMT1 protein	Chtop	0	-0.18	0	0	0	0	29		4584	P07340;A0A096MJI9	Sodium/potassium-transporting ATPase subunit beta-1	Atp1b1	0	-0.21	-0.32	0	0.13	0	25
58	A0A096MKD9		Trim46	-0.51	0	0	0	0.38	0	19		4634	P0DJJ3;F1M1Y0	SH3-containing GRB2-like protein 3-interacting protein 1	Sgip1	0	-0.28	-0.36	0.1	0.21	0	25
616	A0A0G2K2P6;Q6AXM7	HBS1-like protein	Hbs1l	0	0	0	0	0	0.29	32		4669	P11980	Pyruvate kinase PKM	Pkm	0	-0.35	-0.33	0	0.15	0	25
6160	Q62609;Q62609-3;Q62609-2;Q62609-4	Noelin	Olfm1	0	0	-0.27	0	0	0	28		4762	P20272;Q99NU2	Cannabinoid receptor 1	Cnr1	0	0	-0.33	0	0.34	0	25
6161	Q62634;Q62634-2	Vesicular glutamate transporter 1	Slc17a7	0	-0.6	-0.49	0	0	0	2		4773	P21707;Q707P0	Synaptotagmin-1	Syt1	0	-0.24	-0.41	0	0.14	0	25
6162	Q62636;O08814	Ras-related protein Rap-1b	Rap1b	0	-0.18	-0.19	0	0	0	4		4898	P42123	L-lactate dehydrogenase B chain	Ldhb	0	-0.33	-0.33	0.12	0.17	0.12	25
6163	Q62639;M0R3K1	GTP-binding protein Rheb	Rheb	0	0	-0.17	0	0	0	28		4984	Q62861;P54900	Sodium channel subunit beta-2	Scn2b	0	-0.12	-0.37	0	0.22	0	25
6165	Q62651	Delta(3,5)-Delta(2,4)-dienoyl-CoA isomerase, mitochondrial	Ech1	-0.38	0	0	0	0	0	13		5094	Q3ZB97;P62944;P62944-2	AP complex subunit beta;AP-2 complex subunit beta	Ap2b1	-0.13	-0.25	-0.22	0	0.2	0	25
6167	Q62658	Peptidyl-prolyl cis-trans isomerase FKBP1A	Fkbp1a	0	-0.43	-0.26	0.14	0.07	0	33		5104	P63012	Ras-related protein Rab-3A	Rab3a	0	-0.33	-0.43	0.09	0.14	0	25
3350	F1LNT0;Q62951	Dihydropyrimidinase-related protein 4	Dpysl4	0	-0.18	0	0	0	0	29		5192	P84817;P84817-3;P84817-2	Mitochondrial fission 1 protein	Fis1	0	-0.18	-0.33	0	0.1	0	25
6176	Q62720	Zinc transporter 1	Slc30a1	-0.33	0	0	0	0	0	13		5340	Q2I6B2;Q2I6B5;Q2I6B3;Q2I6B4;P25286-2;P25286	V-type proton ATPase subunit a;V-type proton ATPase 116 kDa subunit a isoform 1	Atp6v0a1	0	-0.12	-0.23	0	0.14	0	25
6178	Q62747-2;Q62747-3;Q62747-5;Q62747-8;Q62747-4;Q62747-6;Q62747-7;Q62747		Syt7	0	-0.6	-0.77	0	0	0	2		563	A0A0G2K1I6;P56603;A0A0G2JY82;Q5D009	Secretory carrier-associated membrane protein 1	Scamp1	0	-0.26	-0.27	0	0.19	0	25
6184	Q62768-2;Q62768-3;Q62768	Protein unc-13 homolog A	Unc13a	0	-0.64	-0.3	0	0	0	33		5826	Q5M7T6		Atp6v0d1	0	-0.14	-0.21	0	0.15	0	25
6186	Q62785	28 kDa heat- and acid-stable phosphoprotein	Pdap1	-0.24	0	0	0	0	0	13		6209_m	Q62976;Q62976-11;A0A0G2K104;Q62976-2;Q62976-3;Q62976-8;Q62976-9;Q62976-10;F1LNC7	Calcium-activated potassium channel subunit alpha-1	Kcnma1	0	-0.32	-0.32	0	0.14	0	25
6187	Q62797;Q64641	Protein-tyrosine-phosphatase	Ptpro	0	0.24	0	0	0.49	0.49	11		6261	Q63560;Q63560-2;F1LQZ9	Microtubule-associated protein 6	Map6	-0.15	-0.22	-0.38	0	0.2	0	25
619	A0A0G2K2S2;P11167	Solute carrier family 2, facilitated glucose transporter member 1	Slc2a1	0.26	0	0.29	0	0	0	30		642	A0A0G2K350;D4A0E2		Napg	0	-0.25	-0.39	0	0.18	0	25
6190	Q62824;M0R649;M0RBF8	Exocyst complex component 4	Exoc4	0	0	0	0	0	0.21	32		6807	Q7TP61;Q5XI22;F1LS48;A0A0G2JUB4;D3ZKB6;A0A096MJY8	Acetyl-CoA acetyltransferase, cytosolic	Acat2;RGD1562948	0	-0.35	-0.44	0	0.31	0	25
6191	Q62825	Exocyst complex component 3	Exoc3	0	-0.23	0	0	0.17	0.34	22		6841	Q80Z29;A0A0G2K0I3	Nicotinamide phosphoribosyltransferase	Nampt	0	-0.39	-0.35	0	0.2	0	25
6193	Q62844;A0A096MKC5;A0A0G2K2E3;A0A096MKC1	Tyrosine-protein kinase Fyn;Non-specific protein-tyrosine kinase	Fyn	0	0	0	0.15	0	0	25		6982	Q9EPC6;D3ZDU5	Profilin-2;Profilin	Pfn2	0	-0.21	-0.17	0.11	0.21	0	25
6196	Q62865	cGMP-inhibited 3,5-cyclic phosphodiesterase A	Pde3a	0	-0.17	0	0	0.33	0	10		7058	Q9JKB7;Q9WTT6	Guanine deaminase	Gda	0	-0.26	-0.39	0	0.19	0	25
6693	Q6PCT9		Psmd6	0	0	0	0	0.27	0.4	17		7061	Q9JKS6;Q9JKS6-3;Q9JKS6-2	Protein piccolo	Pclo	0	-0.28	-0.34	0	0.21	0	25
6199_m	Q62876;A0A0G2K3P9;A0A0U1RRP1	Synaptogyrin-1	Syngr1	0	-0.39	-0.2	0	0	0	4		739	A0A0G2K5E7;G3V888;G3V9G4;P16638;P16638-2	ATP-citrate synthase	Acly	0	-0.29	-0.12	0	0.23	0.18	25
6200	Q62888;F1LQ41;A0A0U1RRX0;Q62888-2	Neuroligin-2	Nlgn2	0	-0.28	-0.27	0	0	0	4		746	A0A0G2K5L2;Q5FVG4		LOC100911440	0	-0.22	-0.2	0	0.14	0	25
6206	Q62936;A0A096MJ42;Q62936-2;A0A0G2K0Y9;A0A096MJR5	Disks large homolog 3	Dlg3	-0.57	-0.6	-0.37	-0.14	0	0	18		791	F1LQ81;A0A0G2K6U1;Q9QUL6;O88960;O88975	Vesicle-fusing ATPase	Nsf	0	-0.25	-0.33	0.09	0.19	0.09	25
6209_m	Q62976;Q62976-11;A0A0G2K104;Q62976-2;Q62976-3;Q62976-8;Q62976-9;Q62976-10;F1LNC7	Calcium-activated potassium channel subunit alpha-1	Kcnma1	0	-0.52	-0.35	0	0	0	33		2650	D3ZYJ5		Gramd1b	0	-0.49	-0.31	0	0	0	26
3343	M3ZCQ2;F1LNJ2;Q4KLH1	U5 small nuclear ribonucleoprotein 200 kDa helicase	Snrnp200	-0.2	-0.14	-0.15	0.19	0.39	0.31	16		4402	O08816;F1LSG0	Neural Wiskott-Aldrich syndrome protein	Wasl	0	-0.32	-0.31	0	0	0	16
6211	Q62997;A0A0A0MXY7;O35748	GDNF family receptor alpha-1	Gfra1	0	0	0	0	0	0.67	5		3727	F1M7V6;Q1WIM1	Cell adhesion molecule 4	Cadm4	0	-0.18	-0.3	0	0	0	16
6212	Q63009;A0A0G2K9I8	Protein arginine N-methyltransferase 1	Prmt1	0	-0.11	0	0	0.18	0.43	22		5873	Q5PPG2;Q9R0J8	Legumain	Lgmn	0	-0.21	-0.3	0	0	0	16
6213	Q63016	Large neutral amino acids transporter small subunit 1	Slc7a5	0.36	0	0.22	0	0	0	25		1350	B0K020	CDGSH iron-sulfur domain-containing protein 1	Cisd1	0	-0.38	-0.53	0	0	-0.12	26
2562	D3ZW09;A0A0G2K902		Sorcs2	-0.56	-0.27	-0.08	0	0.23	0.53	16		147	A0A0G2JSZ5;Q63081;D3ZK65	Protein disulfide-isomerase A6	Pdia6;LOC685171	-0.32	-0.46	-0.39	-0.16	0	0	26
5352	Q2TA68-3;Q2TA68-2;Q2TA68	Dynamin-like 120 kDa protein, mitochondrial;Dynamin-like 120 kDa protein, form S1	Opa1	-0.29	-0.22	-0.15	0	0	0	20		2265	D3ZLK9;D4AAT7	ATP-dependent (S)-NAD(P)H-hydrate dehydratase	Carkd	0	-0.19	-0.29	0	0	0	16
1680	B5DEI0		Pcyox1l	-0.46	0	-0.09	0	0.16	0.2	26		1205	A2RRU1	Glycogen [starch] synthase, muscle	Gys1	0	-0.44	-0.29	0	0	0	26
6226	Q63151;Q63151-2	Long-chain-fatty-acid--CoA ligase 3	Acsl3	0	-0.08	0	0	0.31	0.44	17		4787	P23711	Heme oxygenase 2	Hmox2	0	-0.33	-0.29	0	0	0	16
5642	Q561S0;A0A1W2Q6F8;Q6P6W6	NADH dehydrogenase [ubiquinone] 1 alpha subcomplex subunit 10, mitochondrial	Ndufa10	-0.39	-0.23	-0.22	0	0	0	20		6216	Q6AZ05;Q63054;A0A0H2UHX6;Q6RUG5	Islet cell autoantigen 1;Islet cell autoantigen 1-like protein	Ica1;Ica1l	0	-0.27	-0.29	0	0	0	16
6230	Q63198	Contactin-1	Cntn1	-0.35	-0.43	-0.21	0.16	0.17	0.15	9		2635	D3ZY03;A0A0G2JXR9;O88382-3;O88382-2;O88382	Membrane-associated guanylate kinase, WW and PDZ domain-containing protein 2	Magi2	0	-0.38	-0.29	0	0	0	16
6234	Q63259	Receptor-type tyrosine-protein phosphatase-like N	Ptprn	0.6	0	0	0	0	0.45	1		1623	D3ZSF9;B2RZD5		Rpl22l2;LOC688712	0	-0.49	-0.29	0	0	0	26
5826	Q5M7T6		Atp6v0d1	-0.27	-0.29	-0.23	0	0	0	20		6500	Q6AY84	Secernin-1	Scrn1	0	-0.2	-0.29	0	0	0	16
187	A0A0G2JTS3;B2RZ78;B2RZ78-2	Vacuolar protein sorting-associated protein 29	Vps29	-0.47	-0.46	0	0	0.09	0	27		1908	D3ZAA9;O88953		Mpp2	0	-0.39	-0.6	0	0.12	0	26
1582	B2RYW9	Fumarylacetoacetate hydrolase domain-containing protein 2	Fahd2	0	-0.18	0	0	0	0	29		4719	P16975	SPARC	Sparc	0	-0.35	-0.29	0	0	0	16
6249	Q63475	Receptor-type tyrosine-protein phosphatase N2	Ptprn2	-0.42	0	0	0	0	0	13		5114	P63047;Q06FK3	Sulfotransferase 4A1;Sulfotransferase	Sult4a1	0	-0.33	-0.29	0	0	0	16
625	A0A0G2K2V2;G3V9N8;P52303-2;P52303	AP complex subunit beta;AP-1 complex subunit beta-1	Ap1b1	-0.18	-0.21	0	0	0	0	6		2476	D3ZTR5;Q5BJB3;M0R785;A0A0G2K6U2		Zbed5;Chchd2	0	-0.47	-0.29	0	0	0	26
6255	Q63524	Transmembrane emp24 domain-containing protein 2	Tmed2	0	0	0	0	0	0.26	32		3287	F1LLX6		Cadps	0	-0.24	-0.28	0	0	0	16
5114	P63047;Q06FK3	Sulfotransferase 4A1;Sulfotransferase	Sult4a1	-0.51	-0.17	0	0.16	0.55	0.45	16		4141	G3V8W2;Q91XU8	Phosphatidate cytidylyltransferase;Phosphatidate cytidylyltransferase 2	Cds2	0	-0.21	-0.28	0	0	0	16
6261	Q63560;Q63560-2;F1LQZ9	Microtubule-associated protein 6	Map6	0	0	0	0	-0.07	-0.12	25		2699	D3ZZR9	Peptidyl-prolyl cis-trans isomerase	Fkbp2	0	-0.52	-0.48	0	-0.12	0	26
6262	Q63564	Synaptic vesicle glycoprotein 2B	Sv2b	0	-0.58	-0.27	0	0	0	33		4872	P35571;A0A0G2K0Z7;F1LNI0;A0A0G2K1F9	Glycerol-3-phosphate dehydrogenase, mitochondrial;Glycerol-3-phosphate dehydrogenase	Gpd2	0	-0.3	-0.28	0	0	0	16
5080	P62828;Q8K586;Q66H11	GTP-binding nuclear protein Ran;GTP-binding nuclear protein Ran, testis-specific isoform	Ran;Rasl2-9;RGD1306195	0	0	0	0	0.23	0.28	17		5048	P62078	Mitochondrial import inner membrane translocase subunit Tim8 B	Timm8b	0	-0.2	-0.28	0	0	0	16
3221	D4AEH3		Psmd7	0	-0.2	0	0	0.23	0	10		3894	G3V667;Q924W2;Q924W3		Itga6	0	-0.5	-0.27	0	0	0	26
811	A0A0G2K757;P25235	Dolichyl-diphosphooligosaccharide--protein glycosyltransferase subunit 2	Rpn2	0	0	0	0	0.31	0.31	17		4391	O08662;A0A140TAJ5;Q78E76	Phosphatidylinositol 4-kinase alpha	Pi4ka	0	-0.16	-0.27	0	0	0	16
6268	Q63616	Vacuolar protein sorting-associated protein 33B	Vps33b	0	0	0	0	0	0.25	32		317	A0A0G2JWJ0;D4A1S6;D3ZR53;Q10728-2;Q10728;D4ACS0;Q10728-3	Protein phosphatase 1 regulatory subunit;Protein phosphatase 1 regulatory subunit 12A	Ppp1r12a	0	-0.24	-0.27	0	0	0	16
6276	Q63635	Syntaxin-6	Stx6	0	0	0	0	0.26	0	10		486	Q5U2W0;A0A0G2K016		Sun1	0	-0.38	-0.27	0	0	0	16
6287	Q63768;Q63768-2	Adapter molecule crk	Crk	0	0	-0.1	0	0	0	28		6072	Q5XI64	Monoacylglycerol lipase ABHD6	Abhd6	0	-0.37	-0.26	0	0	0	16
1155	A0A1W2Q655;D4A1U1;A0A1W2Q6A5		Zbtb20	-0.45	0	0	0	0	0	26		2525	D3ZUX5		Chchd3	0	-0.17	-0.26	0	0	0	16
1372	B1H257		Loh12cr1	0	-0.18	0	0	0	0	29		3540	F1LVR0		Iglon5	0	-0.42	-0.5	0.14	0	0	26
6294	Q63942	GTP-binding protein Rab-3D	Rab3d	0	-0.62	-0.26	0	0	0	33		6112	Q5XIG0	ADP-ribose pyrophosphatase, mitochondrial	Nudt9	0	-0.37	-0.26	0	0	0	16
6298	Q64057	Alpha-aminoadipic semialdehyde dehydrogenase	Aldh7a1	-0.15	0	0	0	0	0	13		1660	B4F7A9		Csnk2a2	0	-0.3	-0.25	0	0	0	16
6299	Q641W2	UPF0160 protein MYG1, mitochondrial	Myg1	0	0	-0.19	0	0	0	28		3712	F1M779;P11442	Clathrin heavy chain;Clathrin heavy chain 1	Cltc	-0.18	-0.44	-0.46	0.06	0.09	-0.06	26
6303	Q641X3	Beta-hexosaminidase subunit alpha	Hexa	0	0	0.24	0	0	0.25	7		3742	F1M8A4		Ppfia2	0	-0.53	-0.48	0	0.18	0	26
6305	Q641Y0	Dolichyl-diphosphooligosaccharide--protein glycosyltransferase 48 kDa subunit	Ddost	0	0	0	0.08	0	0.26	32		3850	F7F2F3;B4F772		Hspa4l	0	-0.41	-0.58	0	0.1	0	26
5828	Q5M7U6	Actin-related protein 2	Actr2	-0.35	-0.32	-0.17	0	0	0	20		6484	Q6AY48		Pcbp3	0	-0.42	-0.25	0	0	0	16
4131	G3V8T4;Q9ESW0	DNA damage-binding protein 1	Ddb1	-0.12	0	0	0.14	0.23	0.26	17		2634	D3ZXY2		Pdzd8	0	-0.37	-0.25	0	0	0	16
6310	Q641Z2;A0A0G2K6A2	Tyrosine-protein phosphatase non-receptor type 9	Ptpn9	-0.17	0	-0.19	0	0	0	28		6543	Q6AYN4;Q6AYN4-2	Phytanoyl-CoA hydroxylase-interacting protein-like	Phyhipl	-0.19	-0.45	-0.53	0	0	0	26
6312	Q641Z6	EH domain-containing protein 1	Ehd1	0	-0.33	-0.19	0	0	0	4		2063	D3ZF12		Spcs3	0	-0.17	-0.25	0	0	0	16
6316	Q64244	ADP-ribosyl cyclase/cyclic ADP-ribose hydrolase 1	Cd38	0	0	0.75	0	0	0	30		1026	A0A0H2UHF6;Q9ES40	PRA1 family protein 3	Arl6ip5	0	-0.21	-0.24	0	0	0	16
6320	Q642A9		Vps16	0	-0.17	0	0	0.18	0.26	15		4067	Q6P7S6;G3V836;P05371;Q9ERD1;O35510;A0A0G2KB42	Clusterin;Clusterin beta chain;Clusterin alpha chain	Clu	0	-0.44	-0.24	0	0	0	16
6321	Q642B0		Gpc4	-0.31	-0.44	0	0	0	0	6		4530	P00388	NADPH--cytochrome P450 reductase	Por	-0.13	-0.14	-0.17	0	0	0	16
6557	Q6AYT3	tRNA-splicing ligase RtcB homolog	Rtcb	0	0	0	0	0.23	0.37	17		4180	G3V9H0;P50904	Ras GTPase-activating protein 1	Rasa1	0	-0.36	-0.59	0	0.12	0	26
6331	Q64361	Latexin	Lxn	0	0	0.36	-0.18	0	0	30		822	A0A0G2K7G7;G3V9Z6;B0BNF1;A0A0G2JVY6	Septin-8	Sept8	0	-0.16	-0.24	0	0	0	16
6332	Q64428;Q99521	Trifunctional enzyme subunit alpha, mitochondrial;Long-chain enoyl-CoA hydratase;Long chain 3-hydroxyacyl-CoA dehydrogenase	Hadha	-0.19	-0.09	0	-0.05	0	0	13		133	A0A0G2JSR1;Q7TP14;A0JPQ9	Chitinase domain-containing protein 1	Chid1	0	-0.19	-0.23	0	0	0	16
6333	Q64542-3;Q64542-2;Q64542-4;Q64542	Plasma membrane calcium-transporting ATPase 4	Atp2b4	0	-0.41	-0.35	0	0	0	33		2075	D3ZF97		Erlec1	0	-0.39	-0.23	0	0	0	16
6334	Q64548	Reticulon-1	Rtn1	-0.44	-0.29	0	0	0	0	6		3533	F1LV89;Q5EB70		Rap1gap	0	-0.26	-0.23	0	0	0	16
4554_m	P04775;F1M9G9;A0A0G2K207;A9JQD7	Sodium channel protein type 2 subunit alpha	Scn2a	-0.46	-0.45	0	0	0	0	27		4414	O35112	CD166 antigen	Alcam	-0.24	-0.51	-0.55	0.09	0.14	0	26
6336	Q64559-1;F8WG67;Q64559	Cytosolic acyl coenzyme A thioester hydrolase	Acot7	0	-0.3	0	0	0	0.24	15		4502	O88506;A0A0G2K007	STE20/SPS1-related proline-alanine-rich protein kinase	Stk39	0	-0.42	-0.31	0	0	0.24	26
6337	Q64560	Tripeptidyl-peptidase 2	Tpp2	-0.24	-0.25	-0.1	0	0	0.18	37		3487	F1LSQ0;Q924K2	FAS-associated factor 1	Faf1	0	-0.34	-0.22	0	0	0	16
2893	D4A510		Smarcc2	0	-0.18	0	0	0	0	29		6615	Q6MFX8;Q924M0;Q9Z0U4-2;Q9Z0U4;Q5CC44;Q5CC43;B5D5S8;Q920D8;A0A0G2JUQ1;Q9Z0U4-3;Q9Z0U4-4;Q9Z0U4-5;Q719L2	Gamma-aminobutyric acid type B receptor subunit 1	Gabbr1	0	-0.27	-0.22	0	0	0	16
6343	Q64620	Serine/threonine-protein phosphatase 6 catalytic subunit;Serine/threonine-protein phosphatase 6 catalytic subunit, N-terminally processed	Ppp6c	0	0	0	0	0.18	0	10		4596	P08050;Q6Q6S2	Gap junction alpha-1 protein	Gja1	0	-0.47	-0.33	0	0	-0.23	26
6344	Q64654	Lanosterol 14-alpha demethylase	Cyp51a1	-0.37	-0.33	-0.38	0	0	0.28	3		4598	P08082;P08082-2	Clathrin light chain B	Cltb	0	-0.33	-0.51	0.08	0	0	26
6350	Q66H12	Alpha-N-acetylgalactosaminidase	Naga	0	0	0.28	0	0	0.24	7		4636	P0DMW1;P0DMW0	Heat shock 70 kDa protein 1B;Heat shock 70 kDa protein 1A	Hspa1a	0	-0.43	-0.58	0	0.21	0	26
6352	Q66H20;Q66H20-2	Polypyrimidine tract-binding protein 2	Ptbp2	-0.25	-0.25	0	0	0	0.22	37		2046	D3ZEH9;G3C8Z1;Q5XIQ4	E3 ubiquitin-protein ligase MGRN1	Mgrn1	0	-0.34	-0.22	0	0	0	16
6364	Q66H61		RGD1562301	0	0	0	0	0	0.35	1		7140	Q9WVB1	Ras-related protein Rab-6A	Rab6a	-0.27	-0.68	-0.42	0	0	0	26
3799	F1MAA3;Q499R1		LOC100909464;Ppp2r5d	0	-0.17	0	0	0	0	29		1472	B2GV24;A0A0G2K266	E3 UFM1-protein ligase 1	Ufl1	0	-0.31	-0.22	0	0	0	16
6366	Q66H79		Trim32	-0.29	-0.17	0	0	0	0	6		7174	Q9Z270;A0A0G2K8E6	Vesicle-associated membrane protein-associated protein A	Vapa	0	-0.16	-0.22	0	0	0	16
4216	I6L9G6		Tardbp	-0.27	0	0	0	0.26	0.26	16		5745	Q5FVC4		Dnajb12	0	-0.23	-0.21	0	0	0	16
6373	Q66HA8	Heat shock protein 105 kDa	Hsph1	0	-0.16	-0.13	0	0.17	0.23	15		159	A0A0G2JT78;F1LVC3		Rab6b	0	-0.32	-0.21	0	0	0	16
6381	Q66HF1	NADH-ubiquinone oxidoreductase 75 kDa subunit, mitochondrial	Ndufs1	-0.29	-0.26	-0.2	0	0.06	0	20		3936	G3V6P2;Q01205;Q8CJG5;D0VYQ0	Dihydrolipoyllysine-residue succinyltransferase component of 2-oxoglutarate dehydrogenase complex, mitochondrial	Dlst;DLST	0	-0.24	-0.2	0	0	0	16
6451	Q6AXQ0	SUMO-activating enzyme subunit 1;SUMO-activating enzyme subunit 1, N-terminally processed	Sae1	0	0	0	0	0.55	0.53	11		5160	P70580;A0A0H2UHK2	Membrane-associated progesterone receptor component 1	Pgrmc1	0	-0.24	-0.2	0	0	0	16
4046	G3V7V3;Q5BJL7		Slc27a4	0	0	0	0	0.24	0.35	17		4979	Q99JD5;P54690;Q9R170	Branched-chain-amino-acid aminotransferase;Branched-chain-amino-acid aminotransferase, cytosolic	Bcat1	0	-0.41	-0.62	0	-0.12	0	26
6395	Q66HR0;M0R3V5;M0RAK3;A0A096MJB7;A0A096MK93	Solute carrier family 12 member 9	Slc12a9	0	0	0	0	0	0.27	32		4987	P55053;Q2XTA4	Fatty acid-binding protein, epidermal	Fabp5	0	-0.61	-0.49	0	0	0.17	26
6396	Q66HR2;A0A0G2JT48;O35879	Microtubule-associated protein RP/EB family member 1	Mapre1	0	0	-0.12	0	0	0	28		5032	P61265	Syntaxin-1B	Stx1b	0	-0.4	-0.51	0.13	0	0.14	26
6400	Q66X93;D4A8Y5	Staphylococcal nuclease domain-containing protein 1	Snd1	-0.26	-0.17	0	0	0	0.35	37		1845	D3KR63;F1LQ26;Q9Z1C7	Rap guanine nucleotide exchange factor 4	Rapgef4	0	-0.3	-0.2	0	0	0	16
6407	Q68FQ0;Q6B436	T-complex protein 1 subunit epsilon	Cct5	0	-0.2	0	0	0.1	0.25	15		6048	Q5XHZ0	Heat shock protein 75 kDa, mitochondrial	Trap1	0	-0.22	-0.2	0	0	0	16
6410	Q68FQ9		Lancl2	0	-0.25	-0.14	0	0	0	4		5697	Q5BJT9;P25809;A0A0G2JVQ1;B0BNC0;P09605	Creatine kinase U-type, mitochondrial;Creatine kinase S-type, mitochondrial	Ckmt1b;Ckmt1;Ckmt2	0	-0.36	-0.54	0	0	-0.16	26
6412	Q68FR6	Elongation factor 1-gamma	Eef1g	0	0	0.14	0	0	0.28	32		3029	D4A8N1		Dpm1	0	-0.26	-0.18	0	0	0	16
6416	Q68FS2	COP9 signalosome complex subunit 4	Cops4	0	-0.24	0	0	0	0.12	29		1460	B2GUZ5	F-actin-capping protein subunit alpha-1	Capza1	0	-0.2	-0.17	0	0	0	16
6418	Q68FS8		Rtcd1	0	0	0	0.32	0	0	25		7068	Q9JLZ1;Q9JLZ1-2;A0A0G2K5P8	Glutaredoxin-3	Glrx3	0	-0.24	-0.17	0	0	0	16
6118	Q5XIH3		Ndufv1	-0.24	-0.22	-0.2	0	0	0	20		6332	Q64428;Q99521	Trifunctional enzyme subunit alpha, mitochondrial;Long-chain enoyl-CoA hydratase;Long chain 3-hydroxyacyl-CoA dehydrogenase	Hadha	0	-0.17	-0.17	0	0	0	16
6422	Q68FT7		Farsb	0	0	0	0	0	0.42	1		5485	Q4FZT2	Protein phosphatase methylesterase 1	Ppme1	0	-0.3	-0.17	0	0	0	16
6424	Q68FU3	Electron transfer flavoprotein subunit beta	Etfb	0	-0.17	-0.15	0	0	0	4		5484	Q4FZT0	Stomatin-like protein 2, mitochondrial	Stoml2	0	-0.2	-0.17	0	0	0	16
6425	Q68FU7	Ubiquinone biosynthesis monooxygenase COQ6, mitochondrial	Coq6	0	0	0	0	0	0.2	32		6012	Q5U2X8		Acot9	0	-0.26	-0.16	0	0	0	16
2988	D4A7L4		Ndufb11	0	-0.17	0	0	0	0	29		6226	Q63151;Q63151-2	Long-chain-fatty-acid--CoA ligase 3	Acsl3	-0.27	-0.49	-0.44	0	-0.14	0	26
5215	P97603	Neogenin	Neo1	0	-0.17	0	0	0	0	29		6237	Q63355	Unconventional myosin-Ic	Myo1c	0	-0.45	-0.37	0	0	0.19	26
6238	Q63362	NADH dehydrogenase [ubiquinone] 1 alpha subcomplex subunit 5	Ndufa5	-0.39	-0.24	-0.21	0	0	0	20		6455	Q6AXS4	Renin receptor	Atp6ap2	0	-0.18	-0.16	0	0	0	16
1780	B5DFN4		Pfdn5	0	-0.17	0	0	0	0	29		6559	Q6AYT7	Monoacylglycerol lipase ABHD12	Abhd12	0	-0.41	-0.39	-0.1	0	0	26
4048	G3V7V6;Q8VHE9	All-trans-retinol 13,14-reductase	Retsat	0	-0.17	0	0	0	0	29		6706	Q6PST4	Atlastin-1	Atl1	0	-0.62	-0.3	0	0.07	0.17	26
974	A0A0G2KAM3;P49432	Pyruvate dehydrogenase E1 component subunit beta, mitochondrial	Pdhb	-0.26	0	-0.17	0	0	0	8		4058	G3V803;Q9Z1Y3;Q9JIV7	Cadherin-2	Cdh2	0	-0.19	-0.16	0	0	0	16
6441	Q68G33;F6T071;Q9R064	Golgi reassembly-stacking protein 2	Gorasp2	0	0	0	0	0	0.25	32		3928	G3V6L4;A0A0G2K070	Kinesin-like protein	Kif5c	0	-0.24	-0.16	0	0	0	16
6442	Q68G38	Torsin-1A	Tor1a	0	0	0	0	0.24	0	10		276	A0A0G2JVM2;A0A0G2K0A8			0	-0.32	-0.16	0	0	0	16
6443	Q68G39;A0A140UHY2		Cdk16	0	0	0	0	0	0.48	1		6984	Q9EPH2;A0A0G2K613	MARCKS-related protein	Marcksl1	0	-0.42	-0.45	0	0.14	0	26
6444	Q68HB5;Q68HB6;Q68HB8;Q68HB7		Pcdh7	0	0	0	0	0	0.27	32		3762	F1M953;P48721	Stress-70 protein, mitochondrial	Hspa9	0	-0.16	-0.15	0	0	0	16
6448	Q6AXM8	Serum paraoxonase/arylesterase 2	Pon2	0	0	0	0	0.19	0	10		118	A0A0G2JSL2;Q69BT7;A0A0G2JX69	Trafficking protein particle complex subunit 4	Trappc4	0	-0.16	-0.15	0	0	0	16
6392	Q66HM7;P38656;Q4V8Q3;D3ZLH9	Lupus La protein homolog	Ssb;LOC680385	0	0	0	0	0.34	0.58	11		4932	P49620	Diacylglycerol kinase gamma	Dgkg	0	0.52	0.28	0	0	0	30
948	A0A0G2K9V6;Q5XHY5	Threonine--tRNA ligase, cytoplasmic	Tars	0	0	0	0	0.18	0.25	17		7169_m	Q9Z214;A0A0H2UI35;Q9Z214-2;Q9Z214-3;Q811R0;Q811R1;A0A0G2JYD5	Homer protein homolog 1	Homer1	0	-0.41	-0.39	0.15	0	0	26
6455	Q6AXS4	Renin receptor	Atp6ap2	0	0	-0.12	0	0	0.31	1		3318	F1LMV9;Q5EB67	Coronin	Coro2b	0	0.28	0.34	0	0	0	30
6460	Q6AXV4	Sorting and assembly machinery component 50 homolog	Samm50	0	-0.18	-0.16	0	0	0	4		7025	Q9JHW5	Vesicle-associated membrane protein 7	Vamp7	0	0.26	0.37	0	0	0	30
6461	Q6AXW1;Q6AXW1-2	Glutaredoxin-2, mitochondrial	Glrx2	-0.37	0	0	0	0	0	13		1019	A0A0H2UHB1;Q62904	3-keto-steroid reductase	Hsd17b7	0	0	-1.12	0	0	0	27
6464	Q6AXX6	Redox-regulatory protein FAM213A	Fam213a	0	0	-0.24	0	0.19	0	28		2852	D4A3X6	Phospholipid-transporting ATPase	Atp8a2	0	-0.48	-1.08	0	0	0	27
6467	Q6AY02		Rbm17	0	-0.17	-0.1	0	0	0	29		3095	D4AAX6	Phosphoinositide phospholipase C	Plch2	0	-0.45	-1.25	0	0.29	0	27
6473	Q6AY18		Sar1a	0	0	0	0	0.46	0	34		3384	F1LPP6;P24587	A-kinase anchor protein 5	Akap5	0	-0.53	-1.11	0	0	0	27
1548	B2RYP4		Snx2	0	-0.17	0	0	0	0	29		3467	F1LRZ7;P16884	Neurofilament heavy polypeptide	Nefh	0	-0.42	-1.15	0	0	0	27
6475	Q6AY20	Cation-dependent mannose-6-phosphate receptor	M6pr	0	0	0	0	0.18	0	10		3630	F1M1A6		LOC681355	0	0	-1.06	0	0	0	27
6476	Q6AY21		G3bp2	-0.33	-0.25	0	0	0	0	6		3932	G3V6M3;P29101	Synaptotagmin-2	Syt2	0	0	-1	0	0	0	27
6493	Q6AY65	Arfaptin-2	Arfip2	0	-0.41	-0.25	0	0	0	4		4250	M0R5H1		Etl4	0	0	-1.09	0	0	0	27
1647	B4F773;P0C5X8	Protein tweety homolog;Protein tweety homolog 1	Ttyh1	0	-0.17	0	0	0	0	29		4295	M0R809;O35357	Guanine nucleotide-binding protein subunit gamma	Gng4	0	0	-0.96	0	0.28	0	27
6500	Q6AY84	Secernin-1	Scrn1	0	0	0	0	0	0.1	32		4410	O35052	Phosphatidate cytidylyltransferase 1	Cds1	0	0	-1.1	0	-0.15	0	27
6496	Q6AY71	Protein C8orf37 homolog		0	-0.17	0	0	0	0	29		4433	O35458	Vesicular inhibitory amino acid transporter	Slc32a1	0	-0.48	-1.21	0	0.07	0	27
6502	Q6AY87	THO complex subunit 6 homolog	Thoc6	0	0	0	0	0.28	0	10		5115	Q8CHN7;P63055	Purkinje cell protein 4	Pcp4	0	0	-1.05	0.19	0.24	0	27
6511	Q6AYB2		Sphk2	0	0	0	0	0.17	0	10		6972	Q99P74	Ras-related protein Rab-27B	Rab27b	0	0	-1.32	0	0	0	27
6514	Q6AYB5;Q62801	Signal recognition particle 54 kDa protein	Srp54;Srp54a	0	0	0	0	0.36	0	34		7177	Q9Z2I6	Synaptic vesicle glycoprotein 2C	Sv2c	0	0	-1.5	0	0	0	27
6517	Q6AYD3;Q6AYD3-2;A0A0G2JVS2	Proliferation-associated protein 2G4	Pa2g4	0	0	0	0	0	0.44	1		1279	B0BN65		Fam49a	-0.49	-0.65	-0.3	0	0	0	28
871	A0A0G2K8H0;Q5M9G3	Caprin-1	Caprin1	0	-0.16	0	0	0	0	29		191	A0A0G2JTT6			-0.34	-0.36	0	0	0	0	28
6520	Q6AYE2;A0A0G2K714	Endophilin-B1	Sh3glb1	0	0	0.16	0	0	0	25		2102	D3ZG48;Q5BJM0		Ddx50	-0.46	0	0	0	0	0	28
6528	Q6AYI5	Leucine-rich repeat protein SHOC-2	Shoc2	0	0	0	0	0	0.46	1		2160	D3ZHX3		Diras2	-0.34	-0.29	0	0	0.19	0	28
6535	Q6AYK6	Calcyclin-binding protein	Cacybp	0	-0.26	0	0	0.16	0	29		2253	D3ZL45		RGD1560784	-0.71	0	0	0	0	0	28
6293	Q63941;Q6P9W6;Q9QYT8	Ras-related protein Rab-3B	Rab3b	0	-0.16	0	0	0	0	29		3305	F1LMF4;Q8R508	Protocadherin Fat 3	Fat3	-0.8	-0.67	0	0	0	0	28
6543	Q6AYN4;Q6AYN4-2	Phytanoyl-CoA hydroxylase-interacting protein-like	Phyhipl	0	0	0.15	0	0	0.31	1		3391	F1LPV2;P98166	Very low-density lipoprotein receptor	Vldlr	-0.66	-0.42	-0.26	0	0	0	28
6544	Q6AYP7;A0A096MK29	7-methylguanosine phosphate-specific 5-nucleotidase;5-nucleotidase	Nt5c3b	0	0	-0.23	0	0	0.41	1		3693	F1M635;A0A0G2KAD4		Lbh	-0.4	-0.6	0	0	0	0	28
6549	Q6AYR2;D4ACZ5	Protein NDRG3	Ndrg3	-0.55	-0.27	0	0	0	0.43	37		3954	G3V6U4;A0A1B0GWU2;A0A1B0GWQ5;Q8CH84;A0A1B0GWY9	ELAV-like protein;ELAV-like protein 2	Elavl2	-0.58	-0.45	-0.27	0	0	0	28
655	D3ZBP2;A0A0G2K3H5		Sin3a	0	0	-0.3	0	0	0.58	5		4387	O08623;O08623-2;A0A0H2UHB5;O08623-3	Sequestosome-1	Sqstm1	-0.56	0	0	0	-0.3	0	28
6556	Q6AYT0	Quinone oxidoreductase	Cryz	0	0	-0.23	0	0	0	28		4610	P09456;Q6LCA5	cAMP-dependent protein kinase type I-alpha regulatory subunit;cAMP-dependent protein kinase type I-alpha regulatory subunit, N-terminally processed	Prkar1a	-0.43	-0.54	0	0	0	0	28
3220	D4AEG7		Tbc1d13	0	0	0	0	0.34	0.37	17		5015	P60522;F1M1J6	Gamma-aminobutyric acid receptor-associated protein-like 2	Gabarapl2;RGD1562165	-0.31	-0.46	-0.16	0	0	0	28
6386	Q66HG5	Transmembrane 9 superfamily member 2	Tm9sf2	0	0	0	0	0.4	0.39	17		5173	P81377;Q3SWU5;F1M9X5;Q5BJR2	cAMP-dependent protein kinase type I-beta regulatory subunit	Prkar1b;Cyp4f18	-0.4	-0.58	-0.33	0	0	0	28
1949	D3ZBM3	Ferrochelatase	Fech	0	-0.15	0	0	0	0	29		5405	Q3KRF2;Q9Z1A6;Q6P513	Vigilin	Hdlbp	-0.3	-0.37	-0.17	-0.15	0	0	28
6570	Q6DGG0;M0RB67	Peptidyl-prolyl cis-trans isomerase D	Ppid;Ppidl1	0	0	-0.12	0	0	0.18	32		5630	Q505J7		Gal3st3	-0.66	-0.57	0	0	0	0	28
3596	F1LZ81;M0R6K4		Dock4	-0.19	-0.55	-0.25	0	0.34	0.37	21		6724	Q6T487;Q6GMN8		Actn1	-0.37	-0.42	0	0	0	0	28
6307	Q641Y2	NADH dehydrogenase [ubiquinone] iron-sulfur protein 2, mitochondrial	Ndufs2	-0.27	-0.23	-0.21	0	0	0	20		6769	Q761X5;A0A0G2JTK0;F1LM73;F1LNE2;O08722	Netrin receptor UNC5C;Netrin receptor UNC5B	Unc5c;Unc5b	-0.36	-0.5	-0.22	0	0	0	28
6431	Q68FX0;Q99NA6	Isocitrate dehydrogenase [NAD] subunit beta, mitochondrial	Idh3B	-0.29	-0.23	-0.19	0	0	0	20		6956	Q99M64	Phosphatidylinositol 4-kinase type 2-alpha	Pi4k2a	-0.26	-0.45	0	0	0	0	28
232	A0A0G2JUR5			-0.45	0	0	0	0	0	26		7081	Q9QWJ9;Q9QX38	Neuropilin-1	Nrp1	-0.51	0	0.13	0	0	0	28
6588	Q6IMX7	Hsp70-binding protein 1	Hspbp1	0	0	0	0	0	0.51	1		7166	Q9Z1T4;Q9Z1T4-2	Connector enhancer of kinase suppressor of ras 2	Cnksr2	-0.48	-0.51	-0.28	0	0	0	28
6590	Q6IMZ3;P48037;D3ZXN8	Annexin;Annexin A6	Anxa6;Anxa10	-0.17	-0.27	0	0.21	0	0.19	15		1008	A0A0G2QC31;Q56A30;P35234	Protein-tyrosine-phosphatase;Tyrosine-protein phosphatase non-receptor type 5	Ptpn5	0	-0.74	0	0	0	0	29
1900	D3ZA31		Mtmr2	0	-0.15	0	0	0	0	29		1395	M0RDY2;B1WBS7		Fam185a	0	-0.39	0	0	0	0	29
6592	Q6IN15;F1LPB3;O88813	Long-chain-fatty-acid--CoA ligase 5	Acsl5	-0.33	-0.39	-0.24	0	0.18	0	9		1647	B4F773;P0C5X8	Protein tweety homolog;Protein tweety homolog 1	Ttyh1	0	-0.66	0	0	0	0	29
6593	Q6IN22;P00787	Cathepsin B;Cathepsin B light chain;Cathepsin B heavy chain	Ctsb	0	0.24	0.38	0	0.19	0.34	7		1919	D3ZAQ0		Fundc2	0	-0.47	0	0	0	0	29
6595	Q8CJH4;Q6IN37		Gm2a	0	0	0.4	0	0	0.39	7		2118	D3ZGN2;A0A140TAJ0;Q5BJS7	Copine-9	Cpne5;Cpne9	0	-0.44	0	0	0	0	29
6596	Q6IRE4	Tumor susceptibility gene 101 protein	Tsg101	0	0	0	0	0	0.21	32		2433	D3ZSP7		Ttc3	0	-0.44	0	0	0	0	29
6597	Q6IRF8;O54715	V-type proton ATPase subunit S1	Atp6ap1	0	0	-0.15	0	0	0	28		2792	D4A263		Plekhb2	0	-0.48	0	0	0	0	29
6608	Q6JAM9	Transmembrane protein 35	Tmem35	0	0	0	0	0	0.57	5		3088	D4AAJ2;F1LLY3;D3ZVR5;D4A9M2;Q9EPI6;Q9EPI6-4;Q9EPI6-3;Q9EPI6-2;Q7TSC7;A0A140TAI4;Q9EPI6-5	NMDA receptor synaptonuclear signaling and neuronal migration factor	Nsmf	0	-0.48	0	0	0	0	29
6615	Q6MFX8;Q924M0;Q9Z0U4-2;Q9Z0U4;Q5CC44;Q5CC43;B5D5S8;Q920D8;A0A0G2JUQ1;Q9Z0U4-3;Q9Z0U4-4;Q9Z0U4-5;Q719L2	Gamma-aminobutyric acid type B receptor subunit 1	Gabbr1	-0.45	-0.36	-0.17	0	0	0.29	37		3127	D4ABV0		RGD1566320	0	-0.4	0	0	0	0	29
6618	Q6MG06;A0A0G2K6Q5;A0A0G2K444;Q5XI09	Guanine nucleotide-binding protein-like 1	Gnl1	0	-0.3	-0.24	0	0	0.31	24		3393	F1LQ09;Q562A0		Atl2	0	-0.43	0	0	0	0	29
6986	Q9EPH8;A0A0G2JZS2;D4A5H0	Polyadenylate-binding protein 1	Pabpc1;Pabpc5	0	-0.15	0	0	0	0	29		3436	F1LR84;P97738	Neuronal pentraxin-2	Nptx2	0	-0.8	0	0	0	0	29
6620	Q6MG11;A0A0G2K9K5	Alpha-tubulin N-acetyltransferase 1	Atat1	0	-0.31	-0.13	0	0	0	4		346	D3ZZ32;A0A0G2JX67;Q5HZA6-2;Q5HZA6	Prolyl endopeptidase-like	Prepl	-0.2	-0.55	0	0	0	0	29
2502	D3ZUD8		Tm9sf3	0	0	0	0	0.48	0.56	11		3531	F1LV44		Tenm3	0	-0.53	0	0	0	0	29
6624	Q6MG55;A0A0G2K0X5;A0A0G2K4N8;A0A096MJC0;A0A096MKA7	Abhydrolase domain-containing protein 16A	Abhd16a	0	0	-0.21	0	0	0	28		3661	F1M3L7	Epidermal growth factor receptor kinase substrate 8	Eps8	-0.21	-0.38	0	0	0	0	29
6578	Q6GMM8;P97849	Long-chain fatty acid transport protein 1	Slc27a1	-0.17	-0.21	-0.26	0	0	0	20		3699	F1M6E5;Q5BJV5		Nacad	0	-0.41	0	0	0	0	29
6630	Q6MG85	1-acyl-sn-glycerol-3-phosphate acyltransferase	Agpat1	0	-0.29	-0.24	0	0	0	4		3829	F2Z3T4	Muscleblind-like protein 2	Mbnl2	0	-0.38	0	0	0	0	29
6634	Q6MGB5;A0A0G2K6P1;Q5BJM1	Estradiol 17-beta-dehydrogenase 8	Hsd17b8	0	0	-0.26	0	0	0	28		3897	G3V679		Tfrc	0	-0.47	0	0	0	0	29
6636	Q6MGC4;A0A0U1RRW5		Pfdn6	0	-0.26	0	0	0.13	0.22	15		4015	G3V7J1;Q8R553	Calsyntenin-3	Clstn3	0	-0.57	0	0	0	0	29
2615	D3ZXA6		Pdpr	0	-0.15	0	0	0	0	29		4045	G3V7V0;O70143;O70143-2	SHC-transforming protein 3	Shc3	0	-0.79	0	0	0	0	29
6639	Q6NYB7	Ras-related protein Rab-1A	Rab1A	0	0	0	0	0	0.18	32		4090	G3V8C8;Q9QXJ0	Tubulin--tyrosine ligase	Ttl	0	-0.67	0	0	0	0	29
6640	Q6P0K8;P70565	Junction plakoglobin	Jup	-0.41	0	0	0	0	0	13		4302	M0R8C1;Q0VGJ9;A0A0G2K1L5	Receptor expression-enhancing protein	Reep2	0	-0.53	0	0	0	0	29
6643	Q6P3V8		Eif4a1	0	0	0	0.26	0	0.65	5		452	A0A0G2JZG7;Q6P799	Serine--tRNA ligase, cytoplasmic	Sars	0	-0.44	-0.18	0	0	0	29
6644	Q6P3V9;P50878	60S ribosomal protein L4	Rpl4	0	0	0	0	0	0.27	32		470	A0A0G2JZS5;Q7TS62;P53563-3;P53563;Q9WUI5;Q548R7;E9PU78;P53563-2;Q5K547	Bcl-2-like protein 1	Bcl2l1;Bcl2l1-ps1;bcl-X	0	-0.47	0	0	0	0	29
6645	Q6P4Z9	COP9 signalosome complex subunit 8	Cops8	-0.28	0	0	0	0	0	13		472	A0A0G2JZU6;D3ZRB9		Tmeff2	0	-0.52	0	0	0	0	29
6646	Q6P502	T-complex protein 1 subunit gamma	Cct3	-0.22	-0.14	-0.07	0	0.11	0.26	37		5112	Q568Y8;P63043-2;P63043;P63043-3	Stathmin-4	Stmn4	0.52	-0.42	0	0	0	0	29
5050	P62142;Q63682	Serine/threonine-protein phosphatase PP1-beta catalytic subunit	Ppp1cb	0	-0.15	0	0	0	0	29		5396	Q3KRC3		Srpr	0	-0.51	0	0	0	0	29
6649	Q6P685		Eif2s2	0	0	0	0	0	0.39	1		5808	Q5I0F0		Drg1	0	-0.39	0	-0.35	0	0	29
954	A0A0G2KA25;Q4KLL4	Transmembrane 9 superfamily member 4	Tm9sf4	0	0	0	0	0.55	0.65	11		6099	Q5XID7;A0A0G2KAU2	Armadillo repeat-containing X-linked protein 3	Armcx3	0	-0.43	0	0	0	0	29
6650	Q6P686	Osteoclast-stimulating factor 1	Ostf1	0	0	0	0	0	0.3	32		6163	Q62639;M0R3K1	GTP-binding protein Rheb	Rheb	0	-0.45	-0.21	0	0	0	29
6655	Q6P6Q9;F1LNV5;A0A0G2K0T5	Calcium uptake protein 1, mitochondrial	Micu1	0	0	-0.27	0	0	0	28		6211	Q62997;A0A0A0MXY7;O35748	GDNF family receptor alpha-1	Gfra1	0	-0.71	0	0	0	0	29
6656	Q6P6R2	Dihydrolipoyl dehydrogenase, mitochondrial	Dld	0	-0.16	-0.18	0	0	0	4		6246	Q63450	Calcium/calmodulin-dependent protein kinase type 1	Camk1	0	-0.52	-0.22	0	0	0	29
4434	O35509;A0A0G2JZR4	Ras-related protein Rab-11B	Rab11b	-0.44	0	0	0	0	0.25	26		649	F8WFN1;A0A0G2K3B2;Q1H5H1;Q5PQZ8	Selenoprotein T	Selt	0	-0.39	0	0	0	0	29
6663	Q6P6V0	Glucose-6-phosphate isomerase	Gpi	-0.18	-0.37	-0.22	0.06	0	0	9		6694	Q6PCU4;Q63190	Emerin	Emd	0	-0.39	0	0	0	0	29
6665	Q6P747;F1M6V1;A0A096MKG6;A0A096MJ10	Heterochromatin protein 1-binding protein 3	Hp1bp3	0	-0.14	0	0	0.33	0.36	22		6726	Q6TEK3	Vitamin K epoxide reductase complex subunit 1-like protein 1	Vkorc1l1	0	-0.67	0	0	0	0	29
6669	Q6P775;Q8CFG2		Fibp	0	-0.28	0	0	0.31	0	10		6907	Q8VH49	HIG1 domain family member 1A, mitochondrial	Higd1a	0	-0.66	0	0	0	0	29
6670	Q6P791	Ragulator complex protein LAMTOR1	Lamtor1	0	0	0	0.1	0	0	25		6909	Q8VHJ9		Syne1	0	-0.51	0	0	0	0	29
6671	Q6P792;Q9WUH4;A0A0G2K338;Q8K3G3	Four and a half LIM domains protein 1	Fhl1	0	0	0	0	0	0.22	32		6929	Q91ZY8	E3 ubiquitin-protein ligase TRIM9	Trim9	0	-0.44	0	0	0	0	29
6674	Q9QZF6;Q6P7C7	Transmembrane glycoprotein NMB	Gpnmb	0	0	0.46	0	0	0	30		7056	Q9JKA7;A0A0H2UHH6	Potassium/sodium hyperpolarization-activated cyclic nucleotide-gated channel 4	Hcn4	0	-0.76	0	0	0	0	29
6675	Q6P7P5	Basic leucine zipper and W2 domain-containing protein 1	Bzw1	0	-0.19	0	0	0	0.53	5		7155	Q9Z122;A0A140TAE1	Fatty acid desaturase 2	Fads2	0	-0.43	0	0	0	0	29
6676	Q6P7Q1	BRCA1-A complex subunit BRE	Bre	0	-0.16	0	0	0	0.29	15		4294	M0R7U1		Ak5	0	0.22	0.53	0	0.25	0	30
6678	Q6P7Q4	Lactoylglutathione lyase	Glo1	0	-0.33	-0.18	0	0	0.1	4		3587	F1LYG2;Q5BJW2		Sipa1l3	0	0.38	0.38	0	0	0	30
6679	Q6P7R8;D3ZPU3	Very-long-chain 3-oxoacyl-CoA reductase	Hsd17b12	0	0	0	0	0.18	0	10		406	A0A0G2JYD8;G3V7U6;Q8R4C0	Calpain-5	Capn5	0	0.62	0.43	0	0.21	0	30
6680	Q6P7S1;A0A0G2K8T0	Acid ceramidase	Asah1	0	0.12	0	0	0.13	0.22	32		3426	F1LQZ3;A0A0G2JUD6;Q9WV62;Q2P9S3	Kinesin-like protein	Kif3a	0	0.26	0.42	0	0	0	30
6683	Q6P9U3	COMM domain-containing protein 3	Commd3	0	0	0	0	0	0.22	32		7118	Q9R1K2;Q9R1K2-2;A0A096P6L6;Q9R1K2-4;Q9R1K2-3	Teneurin-2;Ten-2, soluble form;Ten-2 intracellular domain	Tenm2	-0.16	-0.38	-0.44	0	0	0	26
533	A0A0G2K0W9;P48004-2;P48004;A0JPK2;F1M6I7	Proteasome subunit alpha type-7;Proteasome subunit alpha type	Psma7;Psma8	0	-0.15	0	0	0	0	29		3202	D4AE31;A0A0G2K3C7		Fam126a	0	0.56	0.43	0	0	0	30
6685	Q6P9V1;Q62745	Tetraspanin;CD81 antigen	Cd81	-0.21	0	0.26	0	0	0.32	7		6312	Q641Z6	EH domain-containing protein 1	Ehd1	0	0.3	0.46	0.09	0.16	0	30
3312	Q3B8P5;F1LMQ3		Psmd8	0	-0.23	0	0	0.23	0.42	22		4207	G3V9X2;Q9R080;Q9R080-4;Q9R080-3;Q9R080-2	G-protein-signaling modulator 1	Gpsm1	0	0.19	0.43	0	0	0	30
6691	Q6PCT3	Tumor protein D54	Tpd52l2	0	0	0	0	0.21	0	10		2450	D3ZT47		Fam171a2	0	0.58	0.48	0.17	0	0	30
6692	Q812B0;Q6PCT8	Succinate dehydrogenase [ubiquinone] cytochrome b small subunit, mitochondrial	Lrrp1;Sdhd	0	0	-0.31	0	0	0	14		5193	P84889	Vang-like protein 2	Vangl2	0	0.51	0.43	0	0	0	30
4194	G3V9P0;Q9WTV5	26S proteasome non-ATPase regulatory subunit 9	Psmd9	0	0	0	0	0.22	0	10		5184	P84076	Neuron-specific calcium-binding protein hippocalcin	Hpca	0	0.44	0.53	0	0.39	0	30
6699	Q6PDV7;D4A1P2	60S ribosomal protein L10	Rpl10;Rpl10l	0	0	0	0	0.18	0	10		3738	F1M842		Tp53bp1	-0.15	-0.25	-0.22	0	0	0	16
67	Q8SEZ0;Q06QK5;Q06QG6;Q06QA1;A0A096XKT9;P11661;A7XYD5;A7XYC1;A0A0A1FZN8	NADH-ubiquinone oxidoreductase chain 5	Mt-nd5;ND5;Mtnd5;Nd5	0	-0.31	-0.19	0	0	0	4		6964	Q99MZ8	LIM and SH3 domain protein 1	Lasp1	0	0.22	0.46	0	0	0	30
456	M0RBF0;A0A0G2JZI0;O88453;A0A0G2JW97	Scaffold attachment factor B1	Safb	0	-0.15	0	0	0	0	29		4868	P35465	Serine/threonine-protein kinase PAK 1	Pak1	0	0.34	0.46	0	0	0	30
4436	O35547	Long-chain-fatty-acid--CoA ligase 4	Acsl4	-0.15	-0.54	-0.43	0.19	0.26	0.45	21		1290	B0BN97;Q498E0	Thioredoxin domain-containing protein 12	Txndc12	-0.3	-0.39	-0.37	0	0	0	26
6710	Q6Q0N1	Cytosolic non-specific dipeptidase	Cndp2	0	0	0	0	0	0.21	32		4105	G3V8J5;Q9ESQ7	PH and SEC7 domain-containing protein 1	Psd	0	0.43	0.46	0	0	0	30
6719	Q6QIX3;Q6QIX3-2	Zinc transporter 3	Slc30a3	0	-0.43	-0.38	0	0	0	33		4429	O35346;A0A0G2KAT5;Q62899;Q62898;O35346-2	Focal adhesion kinase 1	Ptk2	0	0.27	0.47	0	0	0	30
6936	Q920Q0	Paralemmin-1	Palm	-0.35	-0.21	-0.16	0	0	0	20		6574	Q6DUV1;P09216;F1LMV8;Q63432;A0A0G2JXV8	Protein kinase C epsilon type;Protein kinase C	Prkce	0	0.3	0.62	0.11	0.27	0	30
1274	B0BN51;P63164;Q63747;Q5XII7;P17136	Small nuclear ribonucleoprotein-associated protein;Small nuclear ribonucleoprotein-associated protein N;Small nuclear ribonucleoprotein-associated protein B	Snrpb;Snrpn	0	-0.15	0	0	0	0	29		527	A0A0G2K0S7;D3ZPI4		Rap1gap2	0	0.56	0.47	0	0	0	30
6729	Q6TUD4	Protein YIPF3	Yipf3	-0.37	0	0	0	0	0	13		6846	Q810W7-2;Q810W7	Microtubule-associated serine/threonine-protein kinase 1	Mast1	0	0.59	0.51	0	0	0	30
674	A0A0G2K3Y6;D3ZKL3		Cpeb4	0	-0.56	-0.23	0	0	0	33		4875	P36201	Cysteine-rich protein 2	Crip2	0	0.38	0.53	0	0	0	30
675	A0A0G2K3Z9;Q63716	Peroxiredoxin-1	Prdx1	0	0	0	0	0	0.14	32		1114	A0A140TAD1;Q6AY63	ADP-sugar pyrophosphatase	Nudt5	0	0.33	0.53	0	0	0	30
6751	Q6XVN8	Microtubule-associated proteins 1A/1B light chain 3A	Map1lc3a	0	-0.29	-0.15	0	0	0	4		1775	B5DFL9		Sestd1	0	0.42	0.34	0	0.18	0	30
6764	Q71UF4	Histone-binding protein RBBP7	Rbbp7	-0.35	0	0	0	0	0	13		4831	P30835;Q6P783	ATP-dependent 6-phosphofructokinase, liver type;ATP-dependent 6-phosphofructokinase	Pfkl	0	0.22	0.56	0	0	0	30
7000	Q9ER34	Aconitate hydratase, mitochondrial	Aco2	-0.22	-0.27	-0.23	0	0	0	20		1343	B0K010		Txndc17	0	0.32	0.46	0	0.27	0	30
6767	Q75Q41	Mitochondrial import receptor subunit TOM22 homolog	Tomm22	0	-0.11	-0.17	0	0	0	28		2078	D3ZFB6	Proline-rich transmembrane protein 2	Prrt2	0	0.58	0.59	0	0	0	30
6769	Q761X5;A0A0G2JTK0;F1LM73;F1LNE2;O08722	Netrin receptor UNC5C;Netrin receptor UNC5B	Unc5c;Unc5b	-0.28	0	0	0	0	0	13		3541	F1LVR4		Camk1d	0	0.38	0.79	0	0	0	30
6770	Q765A7	GPI inositol-deacylase	Pgap1	-0.27	-0.57	-0.6	0	0.18	0.13	18		6533	Q6AYK1;F1M6U2	RNA-binding protein with serine-rich domain 1	Rnps1;LOC688526	0	0	0	0	0	0.34	9
6773	Q76EQ0;A0A0U1RRW0	Serine racemase	Srr	0	0	0	0	0.21	0	10		1155	A0A1W2Q655;D4A1U1;A0A1W2Q6A5		Zbtb20	0	0.34	0	0	0	0.68	31
6775	Q76IJ9	ELAV-like protein	Elavl3	-0.38	-0.18	0	0	0	0	6		1423	B1WC32;F1LS72;Q4G010		Uba2	0	0	0.24	0	0	0.78	31
6786	Q794E4	Heterogeneous nuclear ribonucleoprotein F;Heterogeneous nuclear ribonucleoprotein F, N-terminally processed	Hnrnpf	0	-0.1	0	0	0	0.28	32		5011	P60123	RuvB-like 1	Ruvbl1	0	0	0	0	0	0.24	9
6789	Q7M0E3;Q7M094	Destrin	Dstn	0	-0.14	0	0	0.13	0	10		4901	Q6P9X2;P42667	Signal peptidase complex catalytic subunit SEC11;Signal peptidase complex catalytic subunit SEC11A	Sec11a	0	0	0	0	0	0.27	9
6792	Q7M767;A0A0G2JU07	Ubiquitin-conjugating enzyme E2 variant 2	Ube2v2	0	-0.48	-0.22	0	0	0	33		4077	G3V878;Q9WTR7	Signal peptidase complex catalytic subunit SEC11;Signal peptidase complex catalytic subunit SEC11C	Sec11c	0	0	0	0	0	0.23	9
6794	Q7TMZ5		Arl6ip1	-0.42	0	0	0	0	0	13		4056	G3V7Z4;P07092;O88772	Glia-derived nexin	Serpine2	0	0	0	0	0	0.25	9
6804	Q7TP42		Sec62	0	0	0	0	0.47	0	34		988	D4A5H6;A0A0G2KB10	Histone-lysine N-methyltransferase	Setd2	0	0	0	0	0	0.29	9
6813	Q7TPB1	T-complex protein 1 subunit delta	Cct4	-0.12	-0.13	0	0	0.1	0.21	15		1102	D3ZW66;A0A0U1RS33;A0A0G2K6Y4		Sgsm2	0	0	0	0	0	0.99	31
6817	Q7TQ77		Hook3	0	0	0	0	0.33	0	34		6528	Q6AYI5	Leucine-rich repeat protein SHOC-2	Shoc2	0	0	0	0	0	0.55	31
6818	Q7TQ84;F1M0P3;A0A0G2K6Q7;A0A0G2JSV9	UAP56-interacting factor	Fyttd1	-0.29	0	0	0	0	0	13		5953	Q5RKH7	Solute carrier family 35 member F6	Slc35f6	0	0	0	0	0	0.25	9
682	A0A0G2K437			0	0	0	0.11	0	0	25		4586	Q6LDS4;P07632;Q6PEC5	Superoxide dismutase [Cu-Zn]	Sod1	0	0	0	0	0	0.31	9
6822	Q7TSA0	Mitochondrial Rho GTPase 2	Rhot2	0	0	-0.15	0	0.17	0	10		3059	D4A9L2		Srsf1	0	0	0	0	0	0.2	9
6827	Q7TT49;A0A0G2KB58	Serine/threonine-protein kinase MRCK beta	Cdc42bpb	0	-0.32	0	0	0	0.18	15		734	A0A0G2K5C8;P84903;A0A1B0GWQ1;B2RYV1;A0A1B0GWK9	Stromal interaction molecule 1	Stim1	0	0	0	0	0	0.25	9
6828	Q80U96;Q9WUW7	Exportin-1	Xpo1	0	0	0	0.07	0.12	0.21	32		4617	P09951	Synapsin-1	Syn1	0	0	0	0	0	0.26	9
6265	Q63584	Transmembrane emp24 domain-containing protein 10	Tmed10	0	0	0	0	0.31	0.21	17		4216	I6L9G6		Tardbp	0	0	0	0	0	0.19	9
684	B0BN52;A0A0G2K459;A0A0G2K7P7		Mtch2	0	0	-0.23	0	0	0	28		3450	F1LRL4;B2GV11		Tbc1d9b	0	0	0	0	0	0.55	31
4676	P12785	Fatty acid synthase;[Acyl-carrier-protein] S-acetyltransferase;[Acyl-carrier-protein] S-malonyltransferase;3-oxoacyl-[acyl-carrier-protein] synthase;3-oxoacyl-[acyl-carrier-protein] reductase;3-hydroxyacyl-[acyl-carrier-protein] dehydratase;Enoyl-[acyl-carrier-protein] reductase;Oleoyl-[acyl-carrier-protein] hydrolase	Fasn	0	-0.28	-0.25	0.11	0.21	0.3	24		6143	Q5XIP9	Transmembrane protein 43	Tmem43	0	0	0	0	0	0.26	9
6844	Q80ZG1;B1H241;A0A1L1WKK3	Synembryn-A	Ric8a	0	-0.25	-0.14	0	0.27	0	10		3473	F1LSC5;P36407-2;P36407;H9KVE7	E3 ubiquitin-protein ligase TRIM23	Trim23	0	0	0	0	0	0.17	9
814	A0A0G2K777;A1L1L6	Mitochondrial Rho GTPase	Rhot1	-0.29	-0.24	-0.22	0	0	0	20		4388	O08629	Transcription intermediary factor 1-beta	Trim28	0	0	0	0	0	0.33	9
6849	Q811X6	Lambda-crystallin homolog	Cryl1	0	0	-0.1	0	0	0	28		78	A0A0A0MXY4;A0A1W2Q676;A0A0G2JU73;F1LP64-2;F1LP64;Q3KR60	E3 ubiquitin-protein ligase TRIP12	Trip12	0	0	0	0	0	0.55	31
930	A0A0G2K9M4			-0.22	-0.27	-0.11	0	0	0	20		6596	Q6IRE4	Tumor susceptibility gene 101 protein	Tsg101	0	0	0	0	0	0.24	9
6854	Q8CF97	Deubiquitinating protein VCIP135	Vcpip1	-0.27	-0.34	0	0	0	0	6		2254	D3ZL50		Ttc37	0	0	0	0	0	0.27	9
6862	Q8CGU4;A0A0G2JVS4	Arf-GAP with GTPase, ANK repeat and PH domain-containing protein 2	Agap2	-0.3	-0.6	-0.3	0	0	0.14	18		2770	D4A1Q9		Ttll12	0	0	0	0	0	0.2	9
6863	Q8CGU6;B3DM90	Nicastrin	Ncstn	-0.31	0	0	0	0	0.22	13		6110	Q5XIF6	Tubulin alpha-4A chain	Tuba4a	0	0	0	0	0	0.24	9
1076	A0A0H2UI02;D4AE59;D4AE59-2	Serine/threonine-protein kinase STK11	Stk11	0	-0.15	0	0	0	0	29		5403	Q3KRE8	Tubulin beta-2B chain	Tubb2b	0	0	0	0	0	0.28	9
7081	Q9QWJ9;Q9QX38	Neuropilin-1	Nrp1	-0.33	-0.66	-0.22	0	0	0	18		5821	Q5M7A4	Ubiquitin-like modifier-activating enzyme 5	Uba5	0	0	0	0	0	0.13	9
3113	D4ABK1		Syngr3	-0.46	-0.36	0	0	0	0	27		3716	F1M7B8;A0A0G2JTH7		Ube3a	0	0	0	0	0	0.43	31
6890	Q8R2H0;A0A0G2K2R1		Atp6v1g2	0	-0.58	-0.24	0	0	0	33		5725	Q5D006;Q6IE71	Ubiquitin carboxyl-terminal hydrolase	Usp11	0	0	0	0	0	0.82	31
4384	O08557	N(G),N(G)-dimethylarginine dimethylaminohydrolase 1	Ddah1	0	-0.14	0	0	0	0	29		6451	Q6AXQ0	SUMO-activating enzyme subunit 1;SUMO-activating enzyme subunit 1, N-terminally processed	Sae1	0	0	0.26	0	0	0.68	31
6895	Q8R491;A0A0G2JTH6	EH domain-containing protein 3	Ehd3	0	-0.22	-0.17	0	0	0	4		5269	Q04462;Q4FZR0;A0A0G2JVG2	Valine--tRNA ligase	Vars	0	0	0	0	0	0.23	9
4429	O35346;A0A0G2KAT5;Q62899;Q62898;O35346-2	Focal adhesion kinase 1	Ptk2	-0.25	0	-0.18	0	0	0	8		1039	A0A0H2UHM0;B5DEN9	Vacuolar protein sorting-associated protein 28 homolog	Vps28	0	0	0	0	0	0.29	9
6897	Q8R4R9	Protein phosphatase 1 regulatory subunit 14C	Ppp1r14c	0	0	-0.3	0	0	0	14		2544	D3ZVH6		Vps41	0	0	0	0	0	0.36	9
69	A0A097BVJ5;P13233	2,3-cyclic-nucleotide 3-phosphodiesterase	Cnp	0	0.39	0.19	0	0	0.27	12		3431	F1LR39;Q499N3;A0A1W2Q6Q7	WD repeat-containing protein 18	Wdr18	0	0	0	0	0	0.32	9
6910	Q8VHK0;Q6AZ44;F7F557	Acyl-coenzyme A thioesterase 8	Acot8	-0.34	-0.26	0	0	0	0	6		2372	D3ZQE8		Xpo5	0	0	0	0	0	0.88	31
4511	O88767;Q5BKC3	Protein deglycase DJ-1	Park7	0	-0.14	0	0	0	0	29		5097	Q3ZAV2;P62961;Q76MJ6;D3ZEV0	Nuclease-sensitive element-binding protein 1	Ybx1;LOC100912427	0	0	0	0	0	0.41	31
6914	Q8VIL3;B3SVE5	ZW10 interactor	Zwint	0.16	0	0	0.24	0	0.3	1		3753	F1M8P2		Zyg11b	0	0	0	0	0	0.35	9
7118	Q9R1K2;Q9R1K2-2;A0A096P6L6;Q9R1K2-4;Q9R1K2-3	Teneurin-2;Ten-2, soluble form;Ten-2 intracellular domain	Tenm2	-0.35	-0.36	0	0	0.29	0.31	16		2427	D3ZSF3			0	0	0	0	0	0.47	31
6919	Q91XV6-2;Q91XV6	FXYD domain-containing ion transport regulator 6	Fxyd6	0	-0.22	0	0	-0.22	0	29		628	A0A0G2K2V5			0	0	0	0	0	0.26	9
692	A0A0G2K4B0;B2RZ13;D4A3F5		Gprc5b	0	0.08	0	0	0	0	25		1086	A0A0H4SN51;A0A0H4SRI2;Q9EQG6-2;A0A0H4SRI7;D4ABK9;A0A0H4SQ65;D3ZWB2;A0A0H4T4D0;A0A0H4SMZ8;Q9EQG6	Kinase D-interacting substrate of 220 kDa	Kidins220	0	0.21	0.2	0	0	0	32
6921	Q91Y79;D3ZET9;A0A0G2K315		Cep170	0	-0.39	-0.29	0	0	0	4		1147	A0A1K0GY57;Q921A4	Cytoglobin	Cygb	0	0.46	0	0	0	0	32
6923	Q91Z79;F1LSE6	Liprin-alpha-3	Ppfia3	0	-0.31	-0.19	0	0	0	4		1362	B0VXR5;Q9R237-2;Q9R237;Q9R237-3	C-Jun-amino-terminal kinase-interacting protein 1	Mapk8ip1	0	0.38	0	0.42	0	0	32
6925	Q91ZN1	Coronin-1A	Coro1a	0	-0.52	-0.48	0	0	0	33		1398	G3V8V3;B1WBU9;P09812	Alpha-1,4 glucan phosphorylase;Glycogen phosphorylase, muscle form	Pygm	0	0.53	0	0	0	0	32
6926	Q91ZQ0	Vacuole membrane protein 1	Vmp1	-0.36	0	0	0	0	0	13		1525	E9PU13;B2RYI6		Snx4	0	0.22	0.21	0	0	0	32
6929	Q91ZY8	E3 ubiquitin-protein ligase TRIM9	Trim9	0	0	0	0	0.43	0	34		1793	C0JPT7		Flna	0	0.21	0	0.11	0.15	0	32
693	A0A0G2K4C6;F1M5N4	Malic enzyme	Me3	0	0	-0.17	0	0	0	28		18	A0A096MJE6;F1LQ63;Q05546;Q05546-2	Tenascin-R	Tnr	0	0.23	-0.13	0	0.13	0	32
6930	Q920A6	Retinoid-inducible serine carboxypeptidase	Scpep1	0	0	0	0	0	0.22	32		1893	D3Z9L5		Wdr11	0	0.28	0	0	0	0	32
6933	Q920L2;Q0QF18	Succinate dehydrogenase [ubiquinone] flavoprotein subunit, mitochondrial	Sdha	-0.3	-0.21	-0.27	0	0	-0.06	20		2037	D3ZE85	DOMON domain-containing protein FRRS1L	Frrs1l	0	0.49	0	0	0	0	32
6934	Q920L7;D4A612	Elongation of very long chain fatty acids protein 5;Elongation of very long chain fatty acids protein 2	Elovl5;Elovl2	-0.18	0	0	0	0	0	13		2048	D3ZEI6		Ncoa5	0	0.2	0	0	0	0	32
1915	D3ZAI6		Nt5dc3	-0.35	-0.53	-0.47	0	0	0	18		2208	D3ZJH2		Sugp2	0	0.26	0.18	0	0	0	32
6155	Q5XIW8	U4/U6.U5 tri-snRNP-associated protein 1	Sart1	0	-0.14	0	0	0	0	29		2368	D3ZQB6		Cecr5	0	0.21	0	0	0	0	32
6940	Q923V4	F-box only protein 6	Fbxo6	0	-0.22	-0.25	0	0	0	4		2494	D3ZU64		Vps37b	0	0.17	0	0	0	0	32
3832	F2Z3T9;Q5EB64		U2af2	-0.3	-0.17	0	0	0.24	0.41	16		2846	D4A3T4		Zfyve1	0	0.4	0	0	0	0	32
6948	Q925Q9;M0RBZ7;Q6IRL5;A0A0H2UHD8;Q925Q9-2;Q925Q9-7;Q925Q9-3;Q925Q9-6;Q925Q9-4;F1LRS8	SH3 domain-containing kinase-binding protein 1;CD2-associated protein	Sh3kbp1;Cd2ap	0	-0.46	-0.25	0	0	0	33		2913	F1LYK3;D4A5I4;F1M031		Nav1	0	0.24	0.19	0	0	0	32
6951	Q99J82	Integrin-linked protein kinase	Ilk	0	0	0.13	0	0	0	25		2974	D4A7A8		Rab7b	0	0.39	0	0	0	0	32
6952	Q99J86;Q99J86-2	Attractin	Atrn	0	0	0	0	0	0.33	1		3183	D4ADE5	Histone-lysine N-methyltransferase SETD7	Setd7	0	0.32	0	0	0	0	32
5122	P63100;P63100-2;A0A0H2UHV6;A0A0G2K4H3;P28470	Calcineurin subunit B type 1;Calcineurin subunit B type 2	Ppp3r1;Ppp3r2	-0.6	-0.83	-0.41	0	0	0	23		3220	D4AEG7		Tbc1d13	0	0.37	0	0	0	0	32
6955	Q99JE4;A0A0G2JW65	Ras-specific guanine nucleotide-releasing factor 2	Rasgrf2	0	-0.43	-0.36	0	0.14	0	33		3222	D4AEH9		Agl	0	0.19	0.09	0	0	0	32
6956	Q99M64	Phosphatidylinositol 4-kinase type 2-alpha	Pi4k2a	0	-0.22	0	0.29	0	0.39	15		3310	F1LMM8;Q64536;Q9JID3	[Pyruvate dehydrogenase (acetyl-transferring)] kinase isozyme 2, mitochondrial	Pdk2	0.4	0.38	0	0	0	0	32
6959	Q99MI5		LOC100912604	0	0.2	0.28	0.11	0.25	0.32	7		3772	F1M9F9;Q6DTM3	Jouberin	Ahi1	0	0.44	0	0	0	0	32
6960	Q99MI7	NEDD8-activating enzyme E1 catalytic subunit	Uba3	0	-0.19	0	0	0.19	0.34	22		3784	F1MA15;Q8K1M8;A0A096MJX1	BMP/retinoic acid-inducible neural-specific protein 2	Brinp2	0	0.3	0	0	0.2	0	32
6961	Q99ML5	Prenylcysteine oxidase	Pcyox1	0	-0.14	0	0	0.19	0.24	15		3977	G3V721;Q8R478	WW domain-binding protein 2	Wbp2	0	0.23	0	0	0	0	32
191	A0A0G2JTT6			-0.38	0	0	0	0.38	0	19		3980	G3V733;Q63537	Synapsin-2	Syn2	0	0.51	0	0	0	0	32
5419	Q3S4A4;Q3S4A5;Q62848-2;Q62848;Q62848-3;Q6IRJ8	ADP-ribosylation factor GTPase-activating protein 1	Arfgap1	-0.24	0	-0.21	0	0	0	8		4106	G3V8K2;O35356	Guanine nucleotide-binding protein subunit gamma	Gng3	0	0.33	0	0	0.25	0	32
3111	D4ABI6;Q91Y78	Ubiquitin carboxyl-terminal hydrolase;Ubiquitin carboxyl-terminal hydrolase isozyme L3	Uchl3	0	-0.14	0	0	0	0	29		4168	G3V982;Q5FVI2		Elmo2	0	0.27	0.18	0	0	0	32
6973	Q99P75	Ras-related protein Rab-9A	Rab9a	0	0	0	0	0.13	0	10		4246	M0R567;Q5EIC4	Interferon regulatory factor 2-binding protein-like	Irf2bpl	0	0.27	0	0	0	0	32
1405	B1WBW4	Armadillo repeat-containing protein 10	Armc10	0	-0.13	0	0	0	0	29		475	A0A0G2JZX5;A0A0G2KAA0			0	0.35	0	0	0	0.27	32
6981	Q9EPB1	Dipeptidyl peptidase 2	Dpp7	0	0	0.28	0	0	0.33	7		4839	P31647	Sodium- and chloride-dependent GABA transporter 3	Slc6a11	0	0.18	0	0	0	0	32
6982	Q9EPC6;D3ZDU5	Profilin-2;Profilin	Pfn2	0	-0.26	-0.21	0	0	0	4		5235	P97888;A0A0G2JWY9	Serine/threonine-protein phosphatase 2A 55 kDa regulatory subunit B gamma isoform	Ppp2r2c	0	0.35	0	0	0	0	32
6984	Q9EPH2;A0A0G2K613	MARCKS-related protein	Marcksl1	0	-0.22	-0.29	0	0	0	4		5282	Q06486;Q06486-2	Casein kinase I isoform delta	Csnk1d	0	0.22	0.19	0	0	0	32
4872	P35571;A0A0G2K0Z7;F1LNI0;A0A0G2K1F9	Glycerol-3-phosphate dehydrogenase, mitochondrial;Glycerol-3-phosphate dehydrogenase	Gpd2	0	-0.13	0	0	0	0	29		5409	Q3MHS7		Gmds	0	0.27	0	0	0	0.24	32
6989	Q9EPR9;A0A0G2JZX9;A0A0G2K2K1;Q9EPS0;Q9EPS1		Pde1a	0	-0.55	0	0	0.33	0	36		5503	Q4G082;Q63159	Ubiquinone biosynthesis O-methyltransferase, mitochondrial	Coq3	0	0.31	0	0	0	0	32
6991	Q9EQH5-2;Q9EQH5	C-terminal-binding protein 2	Ctbp2	-0.23	0	0	0	0	0	13		5647	Q566C7	Diphosphoinositol polyphosphate phosphohydrolase 1	Nudt3	0	0.2	0	0	0	0	32
6994	Q9EQS0	Transaldolase	Taldo1	0	0	0	0.12	0	0	25		6157	Q5YLM1	Sn1-specific diacylglycerol lipase alpha	Dagla	0	0.49	0	0	0	0	32
6996	Q9EQX9;G3V6M7	Ubiquitin-conjugating enzyme E2 N	Ube2n;Ube2t	0	0	-0.17	0	0	0	28		6161	Q62634;Q62634-2	Vesicular glutamate transporter 1	Slc17a7	0	0.25	0	0	0	0	32
5160	P70580;A0A0H2UHK2	Membrane-associated progesterone receptor component 1	Pgrmc1	0	0	-0.21	0.12	0.26	0.22	17		6169	Q62667;A0A140TAE0	Major vault protein	Mvp	0	0.29	0	0	0	0	32
6999	Q9ER31	Ectonucleoside triphosphate diphosphohydrolase 6	Entpd6	0	0	0	0	0.6	0	34		6578	Q6GMM8;P97849	Long-chain fatty acid transport protein 1	Slc27a1	0	0.21	0	0	0	0	32
3776	F1M9N5;Q7TP51;Q6P7A2	Ubiquitin conjugation factor E4 A	Ube4a	-0.3	0	0	0	0.24	0.26	16		6949	Q99068	Alpha-2-macroglobulin receptor-associated protein	Lrpap1	0	0.37	0	0	0	0	32
70	S5RZM8;Q8SEZ5;A0A097PE04;P00406	Cytochrome c oxidase subunit 2	COX2;Mt-co2;Mtco2	0	-0.21	-0.21	0	0	0	4		7060	Q9JKL8	Activity-dependent neuroprotector homeobox protein	Adnp	0	0.34	0	0	0	0	32
6629	Q6MG82	Proline-rich transmembrane protein 1	Prrt1	-1.08	-0.83	-0.37	0	0	0	23		7088_m	Q9QY17;Q9QY17-2;Q9QY17-3;Q9QY17-4;Q6IRI3;R9PXU3	Protein kinase C and casein kinase substrate in neurons 2 protein	Pacsin2	0	0.17	0	0	0	0	32
5165	P70600-3;P70600	Protein-tyrosine kinase 2-beta	Ptk2b	-0.82	-0.85	-0.29	0	0	0	23		901	A0A0G2K999;D3ZDA6		Sdk2	0	0.32	0	0	0.2	0	32
7005	Q9ES21	Phosphatidylinositide phosphatase SAC1	Sacm1l	0	0	0	0.17	0.19	0	10		912	A0A0G2K9E5;D3Z9N3		Lars2	0	0.3	0.19	0	0	0	32
7008	Q9ES71	Dihydroxyacetone phosphate acyltransferase	Gnpat	-0.2	0	0	0	0	0.36	1		1179	A0MV40		Shisa4	0	-0.42	-0.65	0	0	0	33
[truncated: 163 more rows]
