# Supplementary material for: Proteome dynamics during homeostatic scaling in cultured neurons
Source: eLife. 2020 Apr 2;9:e52939. doi: 10.7554/eLife.52939 (PMC7117909; doi:10.7554/eLife.52939)
Supplement: Supplementary file 1. [file elife-52939-supp1.xlsx]

## Sheet: BIC-induced down-scaling
Supplementary Data 1: GO term over-representation of proteins with distinct regulation (BIC vs Ctrl)
More Synthesis & Less degradation			More synthesis only					Less degradation only					Less synthesis and more degradation					Less synthesis					More degradation			Slower turnover
no over-represented terms			GO term	Fold Enrichment	FDR	GO annotation		GO term	Fold Enrichment	FDR	GO annotation		GO term	Fold Enrichment	FDR	GO annotation		GO term	Fold Enrichment	FDR	GO annotation		no over-represented terms			GO term	Fold Enrichment	FDR	GO annotation
			secretory granule membrane	23.06	0.0068	GO cellular component complete		RNA binding	1.67	0.0152	GO molecular function complete		synapse organization	12.09	0.044	GO biological process complete		monovalent inorganic cation transmembrane transporter activity	2.34	0.00975	GO molecular function complete					microtubule motor activity	6.02	0.0114	GO molecular function complete
			whole membrane	4.01	0.00451	GO cellular component complete		nucleic acid binding	1.64	0.00146	GO molecular function complete		parallel fiber to Purkinje cell synapse	67.4	0.00206	GO cellular component complete		inorganic cation transmembrane transporter activity	2.15	0.00324	GO molecular function complete					motor activity	5.05	0.0024	GO molecular function complete
			secretory granule	13.42	0.000103	GO cellular component complete		protein targeting to ER	4.25	0.0463	GO biological process complete		excitatory synapse	42.95	0.000144	GO cellular component complete		cation transmembrane transporter activity	2.04	0.00536	GO molecular function complete					nucleoside-triphosphatase activity	2.01	0.0032	GO molecular function complete
			secretory vesicle	6.83	0.00155	GO cellular component complete		ribosomal large subunit biogenesis	3.91	0.0125	GO biological process complete		synapse	4.17	0.00119	GO cellular component complete		ion transmembrane transporter activity	1.9	0.0076	GO molecular function complete					pyrophosphatase activity	1.9	0.00896	GO molecular function complete
			cytoplasmic vesicle	3.6	0.00675	GO cellular component complete		ribonucleoprotein complex biogenesis	2.07	0.0159	GO biological process complete		postsynaptic density, intracellular component	39.83	0.00454	GO cellular component complete		transmembrane transporter activity	1.7	0.0327	GO molecular function complete					hydrolase activity, acting on acid anhydrides, in phosphorus-containing anhydrides	1.92	0.00654	GO molecular function complete
			intracellular vesicle	3.59	0.00515	GO cellular component complete		ribosome biogenesis	2.77	0.00758	GO biological process complete		postsynaptic density	8.47	0.00274	GO cellular component complete		inorganic molecular entity transmembrane transporter activity	1.94	0.00562	GO molecular function complete					hydrolase activity, acting on acid anhydrides	1.92	0.00626	GO molecular function complete
			vesicle	3.43	0.00566	GO cellular component complete		ncRNA metabolic process	2.43	0.00873	GO biological process complete		asymmetric synapse	8.39	0.00273	GO cellular component complete		regulation of postsynaptic membrane neurotransmitter receptor levels	3	0.0191	GO biological process complete					unfolded protein binding	3.61	0.00242	GO molecular function complete
			extracellular space	6.44	0.0356	GO cellular component complete		RNA metabolic process	1.89	0.0006	GO biological process complete		neuron to neuron synapse	7.86	0.00353	GO cellular component complete		regulation of biological quality	1.34	0.000203	GO biological process complete					protein binding	1.23	0.00644	GO molecular function complete
			extracellular region part	6.36	0.0123	GO cellular component complete		nucleic acid metabolic process	1.87	0.000101	GO biological process complete		neuron part	3.49	0.00275	GO cellular component complete		biological regulation	1.11	0.0434	GO biological process complete					binding	1.14	0.00677	GO molecular function complete
			extracellular region	5.47	0.0277	GO cellular component complete		nucleobase-containing compound metabolic process	1.47	0.00986	GO biological process complete		postsynaptic specialization	8.04	0.00328	GO cellular component complete		proton transmembrane transport	2.69	0.0246	GO biological process complete					ATPase activity, coupled	2.74	0.00626	GO molecular function complete
								organic cyclic compound metabolic process	1.41	0.0153	GO biological process complete		postsynapse	6.45	0.00141	GO cellular component complete		monovalent inorganic cation transport	2.28	0.0138	GO biological process complete					ATPase activity	2.56	0.00462	GO molecular function complete
								organic substance metabolic process	1.25	0.000206	GO biological process complete		synapse part	4.69	0.00185	GO cellular component complete		cation transport	1.84	0.00749	GO biological process complete					ATP binding	2.05	7.73e-05	GO molecular function complete
								metabolic process	1.21	0.0017	GO biological process complete		postsynaptic specialization, intracellular component	36.51	0.0055	GO cellular component complete		ion transport	1.73	0.00213	GO biological process complete					drug binding	1.91	5.93e-05	GO molecular function complete
								cellular nitrogen compound metabolic process	1.5	3.91e-05	GO biological process complete		postsynaptic cytoskeleton	38.94	0.0478	GO cellular component complete		localization	1.23	0.00996	GO biological process complete					adenyl ribonucleotide binding	1.96	4.52e-05	GO molecular function complete
								nitrogen compound metabolic process	1.32	3.62e-05	GO biological process complete		dendritic shaft	26.55	0.0108	GO cellular component complete		inorganic cation transmembrane transport	2.18	0.00165	GO biological process complete					adenyl nucleotide binding	1.97	3.78e-05	GO molecular function complete
								cellular metabolic process	1.26	0.00022	GO biological process complete		plasma membrane bounded cell projection part	3.64	0.0392	GO cellular component complete		cation transmembrane transport	2.01	0.00722	GO biological process complete					purine nucleotide binding	1.81	3.52e-05	GO molecular function complete
								heterocycle metabolic process	1.43	0.0182	GO biological process complete		plasma membrane bounded cell projection	3.46	0.00747	GO cellular component complete		ion transmembrane transport	1.86	0.0055	GO biological process complete					nucleotide binding	1.73	6.83e-05	GO molecular function complete
								cellular aromatic compound metabolic process	1.42	0.0159	GO biological process complete		cell projection	3.4	0.00834	GO cellular component complete		transmembrane transport	1.66	0.0107	GO biological process complete					nucleoside phosphate binding	1.73	5.12e-05	GO molecular function complete
								primary metabolic process	1.27	0.000155	GO biological process complete		cell projection part	3.64	0.0402	GO cellular component complete		inorganic ion transmembrane transport	2.12	0.00173	GO biological process complete					heterocyclic compound binding	1.46	0.000166	GO molecular function complete
								macromolecule metabolic process	1.42	8.39e-06	GO biological process complete		dendrite	6.37	0.00282	GO cellular component complete		protein localization to cell periphery	2.19	0.00987	GO biological process complete					organic cyclic compound binding	1.44	0.000228	GO molecular function complete
								proteasome-mediated ubiquitin-dependent protein catabolic process	2.41	0.012	GO biological process complete		dendritic tree	6.37	0.00301	GO cellular component complete		neurotransmitter transport	2.14	0.0355	GO biological process complete					small molecule binding	1.61	0.000199	GO molecular function complete
								proteasomal protein catabolic process	2.36	0.0122	GO biological process complete		neuron projection	3.74	0.0131	GO cellular component complete		regulation of synaptic plasticity	2.07	0.0299	GO biological process complete					purine ribonucleotide binding	1.81	4.09e-05	GO molecular function complete
								proteolysis involved in cellular protein catabolic process	2.06	0.00454	GO biological process complete		somatodendritic compartment	5.59	0.00206	GO cellular component complete		modulation of chemical synaptic transmission	1.76	0.00723	GO biological process complete					ribonucleotide binding	1.81	4.22e-05	GO molecular function complete
								proteolysis	1.68	0.0344	GO biological process complete		Z disc	23.06	0.0145	GO cellular component complete		regulation of trans-synaptic signaling	1.75	0.00727	GO biological process complete					carbohydrate derivative binding	1.65	0.000655	GO molecular function complete
								protein metabolic process	1.41	0.00113	GO biological process complete		I band	23.06	0.014	GO cellular component complete		regulation of cell communication	1.29	0.0489	GO biological process complete					purine ribonucleoside triphosphate binding	1.87	0.00014	GO molecular function complete
								organonitrogen compound metabolic process	1.26	0.0135	GO biological process complete		sarcomere	15.93	0.034	GO cellular component complete		regulation of cellular process	1.13	0.0464	GO biological process complete					anion binding	1.51	0.00175	GO molecular function complete
								cellular protein catabolic process	2.01	0.00629	GO biological process complete		myofibril	14.13	0.0428	GO cellular component complete		chemical synaptic transmission	2.06	0.00846	GO biological process complete					positive regulation of establishment of protein localization to telomere	10.71	0.00929	GO biological process complete
								cellular protein metabolic process	1.5	0.000142	GO biological process complete		contractile fiber	13.48	0.0466	GO cellular component complete		anterograde trans-synaptic signaling	2.06	0.0082	GO biological process complete					regulation of biological process	1.2	0.0436	GO biological process complete
								cellular macromolecule metabolic process	1.46	3.6e-05	GO biological process complete		contractile fiber part	15.37	0.0365	GO cellular component complete		trans-synaptic signaling	2.05	0.00511	GO biological process complete					positive regulation of protein localization to chromosome, telomeric region	10.71	0.00874	GO biological process complete
								cellular macromolecule catabolic process	2.14	0.000126	GO biological process complete		cortical cytoskeleton	16.53	0.0324	GO cellular component complete		synaptic signaling	2.05	0.00467	GO biological process complete					regulation of protein localization to chromosome, telomeric region	9.64	0.00999	GO biological process complete
								macromolecule catabolic process	2.1	8.35e-05	GO biological process complete		cell cortex part	12.84	0.0108	GO cellular component complete		cell-cell signaling	1.89	0.00202	GO biological process complete					regulation of establishment of protein localization to telomere	10.71	0.0106	GO biological process complete
								organic substance catabolic process	1.5	0.039	GO biological process complete		cell cortex	8.92	0.0335	GO cellular component complete		cell communication	1.4	0.000355	GO biological process complete					regulation of establishment of protein localization to chromosome	10.71	0.00991	GO biological process complete
								protein catabolic process	1.98	0.00434	GO biological process complete		cell periphery	2.84	0.00963	GO cellular component complete		signaling	1.41	0.000477	GO biological process complete					binding of sperm to zona pellucida	8.34	0.00816	GO biological process complete
								organonitrogen compound catabolic process	1.71	0.0152	GO biological process complete		basolateral plasma membrane	14.13	0.0418	GO cellular component complete		synapse organization	2.06	0.00358	GO biological process complete					sperm-egg recognition	8.34	0.00779	GO biological process complete
								ubiquitin-dependent protein catabolic process	2.28	0.00148	GO biological process complete		plasma membrane region	6.1	0.00154	GO cellular component complete		ATP metabolic process	2.03	0.0497	GO biological process complete					cell-cell recognition	6.38	0.0255	GO biological process complete
								modification-dependent protein catabolic process	2.19	0.00262	GO biological process complete		plasma membrane part	4.48	0.002	GO cellular component complete		regulation of membrane potential	1.93	0.0156	GO biological process complete					positive regulation of telomere maintenance via telomerase	7.23	0.0151	GO biological process complete
								modification-dependent macromolecule catabolic process	2.16	0.00298	GO biological process complete		plasma membrane	2.97	0.00703	GO cellular component complete		cell adhesion	1.87	0.0127	GO biological process complete					positive regulation of DNA biosynthetic process	5.56	0.00837	GO biological process complete
								translation	2.05	0.00153	GO biological process complete		dendritic spine	11.34	0.015	GO cellular component complete		biological adhesion	1.85	0.0171	GO biological process complete					regulation of metabolic process	1.47	0.00118	GO biological process complete
								cellular macromolecule biosynthetic process	1.86	0.000234	GO biological process complete		neuron spine	11.02	0.0162	GO cellular component complete		regulation of neurotransmitter levels	1.83	0.0154	GO biological process complete					regulation of cellular metabolic process	1.5	0.00109	GO biological process complete
								macromolecule biosynthetic process	1.87	0.000195	GO biological process complete		postsynaptic membrane	11.32	0.00338	GO cellular component complete		generation of precursor metabolites and energy	1.83	0.0253	GO biological process complete					regulation of cellular process	1.22	0.0247	GO biological process complete
								organic substance biosynthetic process	1.5	0.00209	GO biological process complete		synaptic membrane	8.81	0.00288	GO cellular component complete		positive regulation of cell projection organization	1.75	0.0251	GO biological process complete					positive regulation of DNA metabolic process	3.52	0.00965	GO biological process complete
								biosynthetic process	1.49	0.0025	GO biological process complete		glutamatergic synapse	8.14	0.000613	GO cellular component complete		regulation of cell projection organization	1.64	0.00927	GO biological process complete					regulation of DNA metabolic process	3.14	0.00377	GO biological process complete
								cellular biosynthetic process	1.52	0.00166	GO biological process complete		neuronal cell body	7.38	0.00192	GO cellular component complete		regulation of ion transport	1.75	0.0204	GO biological process complete					regulation of macromolecule metabolic process	1.52	0.00153	GO biological process complete
								peptide biosynthetic process	2.02	0.00168	GO biological process complete		cell body	7.28	0.000951	GO cellular component complete		regulation of transport	1.39	0.0122	GO biological process complete					regulation of nucleobase-containing compound metabolic process	1.64	0.0198	GO biological process complete
								peptide metabolic process	1.89	0.00137	GO biological process complete		cell junction	6.85	0.00112	GO cellular component complete		regulation of localization	1.34	0.00725	GO biological process complete					regulation of primary metabolic process	1.5	0.00134	GO biological process complete
								cellular amide metabolic process	1.83	0.000251	GO biological process complete							protein localization to membrane	1.73	0.0406	GO biological process complete					regulation of nitrogen compound metabolic process	1.52	0.00118	GO biological process complete
								organonitrogen compound biosynthetic process	1.57	0.00964	GO biological process complete							positive regulation of protein phosphorylation	1.69	0.0433	GO biological process complete					regulation of DNA biosynthetic process	4.89	0.00849	GO biological process complete
								amide biosynthetic process	1.94	0.00149	GO biological process complete							positive regulation of phosphorylation	1.66	0.0456	GO biological process complete					positive regulation of telomere maintenance via telomere lengthening	6.38	0.0248	GO biological process complete
								cellular nitrogen compound biosynthetic process	1.56	0.0132	GO biological process complete							positive regulation of phosphate metabolic process	1.65	0.0277	GO biological process complete					regulation of telomere maintenance via telomere lengthening	6.02	0.0174	GO biological process complete
								gene expression	1.77	5.1e-05	GO biological process complete							positive regulation of phosphorus metabolic process	1.65	0.0281	GO biological process complete					regulation of telomere maintenance	5.1	0.0216	GO biological process complete
								protein modification by small protein conjugation or removal	1.99	0.0476	GO biological process complete							regulation of cell morphogenesis	1.67	0.0457	GO biological process complete					regulation of telomere maintenance via telomerase	7.09	0.00814	GO biological process complete
								proteasome regulatory particle, lid subcomplex	7.08	0.0232	GO cellular component complete							regulation of plasma membrane bounded cell projection organization	1.63	0.01	GO biological process complete					toxin transport	6.38	0.0264	GO biological process complete
								proteasome regulatory particle	6.34	7.68e-05	GO cellular component complete							cytoskeleton organization	1.62	0.01	GO biological process complete					axo-dendritic transport	4.3	0.00816	GO biological process complete
								proteasome accessory complex	5.73	0.000112	GO cellular component complete							regulation of secretion	1.59	0.0432	GO biological process complete					transport along microtubule	3.95	0.00352	GO biological process complete
								protein-containing complex	1.18	0.0471	GO cellular component complete							generation of neurons	1.41	0.0263	GO biological process complete					microtubule-based transport	3.88	0.00355	GO biological process complete
								proteasome complex	2.77	0.024	GO cellular component complete							nervous system development	1.38	0.00649	GO biological process complete					microtubule-based movement	3.68	0.00194	GO biological process complete
								endopeptidase complex	2.71	0.0254	GO cellular component complete							system development	1.26	0.0256	GO biological process complete					microtubule-based process	2.25	0.0253	GO biological process complete
								peptidase complex	2.86	0.00387	GO cellular component complete							anatomical structure development	1.22	0.0411	GO biological process complete					cytoskeleton-dependent intracellular transport	3.69	0.00593	GO biological process complete
								proteasome regulatory particle, base subcomplex	5.66	0.0237	GO cellular component complete							developmental process	1.21	0.0457	GO biological process complete					protein folding	3.61	0.00109	GO biological process complete
								aminoacyl-tRNA synthetase multienzyme complex	5.15	0.0337	GO cellular component complete							multicellular organism development	1.24	0.0297	GO biological process complete					RNA splicing	3.01	0.0036	GO biological process complete
								cytosolic large ribosomal subunit	3.62	0.000427	GO cellular component complete							multicellular organismal process	1.21	0.0413	GO biological process complete					mRNA processing	2.59	0.00835	GO biological process complete
								cytosolic part	2.24	0.000478	GO cellular component complete							signal transduction	1.34	0.0253	GO biological process complete					mRNA metabolic process	2.33	0.0193	GO biological process complete
								cytosol	1.3	0.00115	GO cellular component complete							cytochrome complex	3.88	0.0392	GO cellular component complete					chaperonin-containing T-complex	12.04	0.00151	GO cellular component complete
								ribosomal subunit	1.88	0.0378	GO cellular component complete							intrinsic component of postsynaptic density membrane	2.89	0.029	GO cellular component complete					cytosol	1.3	0.0424	GO cellular component complete
								ribonucleoprotein complex	1.52	0.0235	GO cellular component complete							intrinsic component of postsynaptic specialization membrane	2.92	0.00391	GO cellular component complete					chaperone complex	7.79	0.000876	GO cellular component complete
								ribosome	1.8	0.049	GO cellular component complete							intrinsic component of postsynaptic membrane	2.73	0.000285	GO cellular component complete					zona pellucida receptor complex	10.71	0.00152	GO cellular component complete
								cytosolic ribosome	3.12	7.91e-05	GO cellular component complete							intrinsic component of synaptic membrane	2.81	1.47e-06	GO cellular component complete					kinesin complex	6.49	0.025	GO cellular component complete
								rough endoplasmic reticulum	3.11	0.00671	GO cellular component complete							synapse part	1.87	3.45e-13	GO cellular component complete					microtubule associated complex	3.61	0.023	GO cellular component complete
								endoplasmic reticulum membrane	1.58	0.0478	GO cellular component complete							synapse	1.7	6.87e-12	GO cellular component complete					microtubule cytoskeleton	2.2	0.000109	GO cellular component complete
								nuclear outer membrane-endoplasmic reticulum membrane network	1.57	0.0453	GO cellular component complete							synaptic membrane	2.39	3.17e-09	GO cellular component complete					cytoskeleton	1.64	0.0052	GO cellular component complete
								endoplasmic reticulum part	1.54	0.0452	GO cellular component complete							plasma membrane region	1.77	5.7e-07	GO cellular component complete					cytoskeletal part	1.82	0.00147	GO cellular component complete
								nuclear lumen	1.3	0.038	GO cellular component complete							membrane	1.24	1.29e-07	GO cellular component complete					spindle microtubule	5.62	0.0434	GO cellular component complete
																		plasma membrane part	1.58	5.23e-07	GO cellular component complete					microtubule	3.53	3.04e-07	GO cellular component complete
																		plasma membrane	1.42	1.22e-07	GO cellular component complete					polymeric cytoskeletal fiber	2.62	4.52e-05	GO cellular component complete
																		cell periphery	1.44	1.37e-08	GO cellular component complete					supramolecular fiber	2.11	0.00138	GO cellular component complete
																		membrane part	1.33	9.37e-08	GO cellular component complete					supramolecular polymer	2.11	0.00127	GO cellular component complete
																		intrinsic component of plasma membrane	1.76	0.000418	GO cellular component complete					supramolecular complex	2.11	0.00117	GO cellular component complete
																		intrinsic component of membrane	1.37	0.000157	GO cellular component complete					axon cytoplasm	4.01	0.0319	GO cellular component complete
																		postsynaptic membrane	2.31	1.85e-05	GO cellular component complete					neuron projection cytoplasm	3.4	0.0224	GO cellular component complete
																		postsynapse	1.88	2.18e-08	GO cellular component complete					plasma membrane bounded cell projection cytoplasm	2.97	0.0142	GO cellular component complete
																		postsynaptic specialization membrane	2.83	0.00119	GO cellular component complete					axon part	2.2	0.00103	GO cellular component complete
																		postsynaptic specialization	1.81	0.000416	GO cellular component complete					axon	1.91	0.00164	GO cellular component complete
																		neuron part	1.57	1.74e-10	GO cellular component complete					catalytic step 2 spliceosome	3.31	0.0187	GO cellular component complete
																		postsynaptic density membrane	2.87	0.006	GO cellular component complete					spliceosomal complex	2.86	0.0101	GO cellular component complete
																		postsynaptic density	1.76	0.00129	GO cellular component complete					growth cone	2.87	0.00179	GO cellular component complete
																		asymmetric synapse	1.74	0.00178	GO cellular component complete					distal axon	2.05	0.0135	GO cellular component complete
																		neuron to neuron synapse	1.77	0.000668	GO cellular component complete					site of polarized growth	2.85	0.00138	GO cellular component complete
																		integral component of presynaptic membrane	2.83	0.00373	GO cellular component complete					neuronal cell body	1.83	0.0221	GO cellular component complete
																		integral component of synaptic membrane	2.75	1.99e-05	GO cellular component complete					cell body	1.91	0.00203	GO cellular component complete
																		integral component of plasma membrane	1.75	0.00121	GO cellular component complete
																		integral component of membrane	1.35	0.000618	GO cellular component complete
																		intrinsic component of presynaptic membrane	2.78	0.00176	GO cellular component complete
																		presynaptic membrane	2.36	0.000494	GO cellular component complete
																		presynapse	1.92	4.03e-08	GO cellular component complete
																		integral component of postsynaptic specialization membrane	2.82	0.0133	GO cellular component complete
																		integral component of postsynaptic membrane	2.71	0.000946	GO cellular component complete
																		excitatory synapse	2.67	0.0253	GO cellular component complete
																		presynaptic active zone	2.58	0.00558	GO cellular component complete
																		cortical actin cytoskeleton	2.46	0.0499	GO cellular component complete
																		cortical cytoskeleton	2.29	0.0309	GO cellular component complete
																		cell cortex part	2.05	0.00933	GO cellular component complete
																		cation channel complex	2.31	0.0137	GO cellular component complete
																		ion channel complex	2.21	0.00704	GO cellular component complete
																		transmembrane transporter complex	2.22	0.00371	GO cellular component complete
																		transporter complex	2.15	0.00499	GO cellular component complete
																		myelin sheath	2.22	1.28e-05	GO cellular component complete
																		leading edge membrane	2.07	0.047	GO cellular component complete
																		cell leading edge	1.79	0.00507	GO cellular component complete
																		axon terminus	2.03	0.00544	GO cellular component complete
																		distal axon	1.72	0.00364	GO cellular component complete
																		axon part	1.72	0.00072	GO cellular component complete
																		axon	1.7	2e-05	GO cellular component complete
																		neuron projection	1.63	1.27e-08	GO cellular component complete
																		plasma membrane bounded cell projection	1.55	1.33e-08	GO cellular component complete
																		cell projection	1.55	8.95e-09	GO cellular component complete
																		plasma membrane bounded cell projection part	1.59	6.7e-07	GO cellular component complete
																		cell projection part	1.59	7.07e-07	GO cellular component complete
																		neuron projection terminus	2.11	0.00125	GO cellular component complete
																		glutamatergic synapse	2.01	4.37e-08	GO cellular component complete
																		cell-cell junction	1.9	0.00491	GO cellular component complete
																		cell junction	1.87	1.32e-07	GO cellular component complete
																		synaptic vesicle membrane	1.89	0.0471	GO cellular component complete
																		exocytic vesicle membrane	1.89	0.0477	GO cellular component complete
																		transport vesicle	1.6	0.0205	GO cellular component complete
																		synaptic vesicle	1.75	0.0145	GO cellular component complete
																		exocytic vesicle	1.66	0.0252	GO cellular component complete
																		secretory vesicle	1.56	0.0159	GO cellular component complete
																		dendritic spine	1.81	0.0454	GO cellular component complete
																		dendrite	1.67	0.000173	GO cellular component complete
																		dendritic tree	1.67	0.000178	GO cellular component complete
																		somatodendritic compartment	1.61	4.18e-05	GO cellular component complete
																		neuron spine	1.86	0.0263	GO cellular component complete
																		plasma membrane protein complex	1.74	0.0206	GO cellular component complete
																		neuronal cell body	1.64	0.0012	GO cellular component complete
																		cell body	1.57	0.00173	GO cellular component complete

## Sheet: TTX-induced up-scaling
Supplementary Data 1: GO term over-representation of proteins with distinct regulation (TTX vs Ctrl)
More Synthesis & Less degradation					More synthesis only			Less degradation only					Less synthesis and more degradation					Less synthesis					More degradation					Slower turnover
GO term	Fold Enrichment	FDR	GO annotation		no over-represented terms			GO term	Fold Enrichment	FDR	GO annotation		GO term	Fold Enrichment	FDR	GO annotation		GO term	Fold Enrichment	FDR	GO annotation		GO term	Fold Enrichment	FDR	GO annotation		GO term	Fold Enrichment	FDR	GO annotation
signaling	1.99	0.0293	GO biological process complete					magnesium ion binding	2.99	0.0117	GO molecular function complete		protein disulfide isomerase activity	47.73	0.0105	GO molecular function complete		intrinsic component of presynaptic membrane	2.74	0.0278	GO cellular component complete		5.8S rRNA binding	48	0.0418	GO molecular function complete		presynaptic active zone	7.54	0.0371	GO cellular component complete
cell communication	1.99	0.0578	GO biological process complete					catalytic activity, acting on a protein	1.74	0.00608	GO molecular function complete		intramolecular oxidoreductase activity, transposing S-S bonds	47.73	0.021	GO molecular function complete		presynaptic membrane	2.38	0.00719	GO cellular component complete		rRNA binding	15.61	7.63e-05	GO molecular function complete		presynapse	3.6	0.000913	GO cellular component complete
cellular response to stimulus	1.72	0.0381	GO biological process complete					catalytic activity	1.42	4.97e-06	GO molecular function complete		COPI vesicle coat	29.83	0.0222	GO cellular component complete		neuron part	1.29	0.0449	GO cellular component complete		RNA binding	3.47	0.00404	GO molecular function complete		synapse part	2.32	0.038	GO cellular component complete
response to stimulus	1.59	0.0392	GO biological process complete					hydrolase activity	1.61	0.00223	GO molecular function complete		COPI-coated vesicle membrane	21.69	0.0236	GO cellular component complete		synapse part	1.53	0.00099	GO cellular component complete		nucleic acid binding	2.68	0.0414	GO molecular function complete		synapse	2.31	0.00958	GO cellular component complete
secretory granule	5.51	0.00064	GO cellular component complete					nucleoside diphosphate phosphorylation	4.92	0.0427	GO biological process complete		endoplasmic reticulum chaperone complex	29.83	0.0148	GO cellular component complete		synapse	1.41	0.00449	GO cellular component complete		structural constituent of ribosome	14.87	6.38e-16	GO molecular function complete		myelin sheath	4.22	0.0411	GO cellular component complete
								nucleotide phosphorylation	4.72	0.0485	GO biological process complete		eukaryotic translation initiation factor 3 complex	18.36	0.0335	GO cellular component complete		synaptic membrane	2.04	0.000752	GO cellular component complete		structural molecule activity	6.67	9.46e-10	GO molecular function complete		whole membrane	2.47	0.0364	GO cellular component complete
								phosphate-containing compound metabolic process	1.63	0.0311	GO biological process complete		endoplasmic reticulum lumen	12.66	0.00418	GO cellular component complete		membrane	1.27	8.51e-07	GO cellular component complete		ribosomal small subunit biogenesis	21.82	0.000528	GO biological process complete		cell periphery	1.82	0.0391	GO cellular component complete
								phosphorus metabolic process	1.61	0.0387	GO biological process complete							plasma membrane part	1.38	0.0317	GO cellular component complete		ribonucleoprotein complex biogenesis	5.14	0.0246	GO biological process complete
								carbohydrate catabolic process	4.17	0.0333	GO biological process complete							plasma membrane	1.33	0.00483	GO cellular component complete		ribosome biogenesis	9.14	0.00197	GO biological process complete
								carbohydrate metabolic process	3.2	0.000196	GO biological process complete							cell periphery	1.32	0.00374	GO cellular component complete		rRNA processing	13.66	0.000869	GO biological process complete
								carbohydrate derivative metabolic process	1.96	0.0368	GO biological process complete							membrane part	1.37	8.2e-07	GO cellular component complete		rRNA metabolic process	12.44	0.00143	GO biological process complete
								intracellular signal transduction	1.77	0.0456	GO biological process complete							intrinsic component of synaptic membrane	2.3	0.0112	GO cellular component complete		cellular nitrogen compound metabolic process	2.61	4.59e-05	GO biological process complete
								cellular response to stimulus	1.35	0.0303	GO biological process complete							intrinsic component of plasma membrane	1.83	0.00348	GO cellular component complete		nitrogen compound metabolic process	1.78	0.00848	GO biological process complete
								response to stimulus	1.26	0.0412	GO biological process complete							intrinsic component of membrane	1.68	2.4e-10	GO cellular component complete		cellular metabolic process	1.65	0.0115	GO biological process complete
								regulation of protein modification process	1.73	0.0301	GO biological process complete							GABA-ergic synapse	2.54	0.027	GO cellular component complete		ncRNA processing	9.66	0.00536	GO biological process complete
								regulation of phosphate metabolic process	1.72	0.0462	GO biological process complete							integral component of postsynaptic membrane	2.47	0.0383	GO cellular component complete		RNA processing	4.15	0.0479	GO biological process complete
								regulation of phosphorus metabolic process	1.72	0.0439	GO biological process complete							integral component of synaptic membrane	2.21	0.0402	GO cellular component complete		gene expression	4.18	7.08e-08	GO biological process complete
								cellular protein modification process	1.63	0.0344	GO biological process complete							integral component of plasma membrane	1.79	0.0126	GO cellular component complete		cytoplasmic translation	11.2	0.00242	GO biological process complete
								protein modification process	1.63	0.0312	GO biological process complete							integral component of membrane	1.64	1.8e-08	GO cellular component complete		translation	8	1.35e-09	GO biological process complete
								macromolecule modification	1.6	0.0379	GO biological process complete							intrinsic component of postsynaptic membrane	2.39	0.0284	GO cellular component complete		cellular protein metabolic process	2.42	0.00253	GO biological process complete
								regulation of catalytic activity	1.58	0.0475	GO biological process complete							postsynaptic membrane	2.12	0.00667	GO cellular component complete		protein metabolic process	2.12	0.0295	GO biological process complete
								regulation of molecular function	1.57	0.00753	GO biological process complete							postsynapse	1.51	0.0357	GO cellular component complete		organonitrogen compound metabolic process	1.93	0.00832	GO biological process complete
								response to chemical	1.36	0.044	GO biological process complete							endoplasmic reticulum membrane	1.76	0.00698	GO cellular component complete		cellular macromolecule biosynthetic process	4.91	8.4e-07	GO biological process complete
								vacuole	1.93	0.0473	GO cellular component complete							nuclear outer membrane-endoplasmic reticulum membrane network	1.74	0.00733	GO cellular component complete		macromolecule biosynthetic process	4.89	7.86e-07	GO biological process complete
								distal axon	1.89	0.0437	GO cellular component complete							endoplasmic reticulum part	1.82	0.0011	GO cellular component complete		organic substance biosynthetic process	2.98	0.000176	GO biological process complete
								neuron part	1.37	0.0378	GO cellular component complete							endoplasmic reticulum	1.57	0.00153	GO cellular component complete		biosynthetic process	2.9	0.000269	GO biological process complete
								cytosol	1.42	0.000215	GO cellular component complete							glutamatergic synapse	1.59	0.0292	GO cellular component complete		cellular biosynthetic process	3.08	0.000104	GO biological process complete
																							peptide biosynthetic process	7.88	8.77e-10	GO biological process complete
																							peptide metabolic process	6.04	4.7e-08	GO biological process complete
																							cellular amide metabolic process	4.99	2.49e-07	GO biological process complete
																							organonitrogen compound biosynthetic process	4.29	3.2e-07	GO biological process complete
																							amide biosynthetic process	6.78	8.28e-09	GO biological process complete
																							cellular nitrogen compound biosynthetic process	4.01	7.23e-06	GO biological process complete
																							cytosolic small ribosomal subunit	33.94	1.51e-14	GO cellular component complete
																							small ribosomal subunit	20.36	4.77e-12	GO cellular component complete
																							ribosomal subunit	13.13	1.79e-15	GO cellular component complete
																							ribonucleoprotein complex	5.25	2.11e-10	GO cellular component complete
																							ribosome	11.83	6.17e-15	GO cellular component complete
																							intracellular non-membrane-bounded organelle	1.92	0.0364	GO cellular component complete
																							non-membrane-bounded organelle	1.9	0.0359	GO cellular component complete
																							cytosolic ribosome	22.4	2.04e-19	GO cellular component complete
																							cytosolic part	11.91	7.21e-15	GO cellular component complete
																							cytosol	1.81	0.0454	GO cellular component complete
																							polysomal ribosome	20.74	1.85e-05	GO cellular component complete
																							polysome	15.38	3.49e-07	GO cellular component complete
																							cytosolic large ribosomal subunit	14.88	1.78e-05	GO cellular component complete
																							large ribosomal subunit	8.31	0.000895	GO cellular component complete
																							postsynaptic density	3.7	0.0391	GO cellular component complete
																							asymmetric synapse	3.67	0.036	GO cellular component complete
																							neuron to neuron synapse	3.45	0.0453	GO cellular component complete
																							postsynaptic specialization	3.51	0.0446	GO cellular component complete
