# Supplementary material for: Proteome dynamics during homeostatic scaling in cultured neurons
Source: eLife. 2020 Apr 2;9:e52939. doi: 10.7554/eLife.52939 (PMC7117909; doi:10.7554/eLife.52939)
Supplement: Supplementary file 2. [file elife-52939-supp2.xlsx]

## Sheet: MS parameters
Supplementary Data 2: MS settings
Q Exactive Plus				Lumos Fusion
	Parameter	Value			Parameter	Value
General settings	Polarity	Positive		General settings	Polarity	Positive
	Default charge state	2			Default charge state	2
MS1 settings	Microscans	1		MS1 settings	Cycle time	2s
	Resolution	70000			Analyzer	FTMS
	AGC target	3000000			Mass range	Normal
	Maximum IT	60 ms			Resolution	120000
	Number of scan ranges	1			Data type	Profile
	Scan range	350 to 1,400 m/z			Scan range	350 to 1,400 m/z
	Spectrum data type	Profile			Wide quadrupole isolation window	TRUE
MS2 settings	Microscans	1			Microscans	1
	Resolution	17500			AGC target	200000
	AGC target	1000000			Maximum IT	50 ms
	Maximum IT	60 ms			MIPS mode	Peptide
	TopN	10			Charge states	2-5
	Isolation window	1.7 m/z			Dynamic exclusion time	30 s
	Isolation offset	0.0 m/z		MS2 settings	Isolation mode	Quadrupole
	Fixed first mass	-			Isolation window	1.4 m/z
	Normalized collision energy	30			Isolation offset	0.0 m/z
	Spectrum data type	Profile			Scan range mode	Auto normal
	Minimum AGC target	24000			Activation type	HCD
	Charge exclusion	Unassigned, 1, ≥ 6			Normalized collision energy	30
	Peptide match	Preferred			Detector type	Ion trap
	Exclude isotopes	on			Ion trap scan rate	Rapid
	Dynamic exclusion time	30 s			Maximum IT	300 ms
					AGC target	10000
					Data type	Centroid
