# Supplementary material for: Proteome dynamics during homeostatic scaling in cultured neurons
Source: eLife. 2020 Apr 2;9:e52939. doi: 10.7554/eLife.52939 (PMC7117909; doi:10.7554/eLife.52939)
Supplement: Supplementary file 3. [file elife-52939-supp3.xlsx]

## Sheet: Sample tables
Supplementary Data 3: Sample overview and MaxQuant search parameters
Tripple SILAC samples									Double SILAC samples
Biological replicate	Treatment	Time point	SCX Fraction	Technical replicate	File name	"Experiment"	"Fraction"		Biological replicate	Treatment	Time point	File name	"Experiment"
1	Ctrl	0 days	1	1	170825_1275_N32_IS_SCX1_C0_212min_Mann_4_5uL_a	R1_C0	5		1	Ctrl	0 days	170401_1275_AlDoerr_N32_t0_212min_Mann_3uL_a	N32_C0
				2	170825_1275_N32_IS_SCX1_C0_212min_Mann_4_5uL_b	R1_C0	5				1 day	170401_1275_AlDoerr_N32_1d_212min_Mann_3uL_a	N32_C1
			2	1	170811_1275_N32_IS_SCX2_C0_212min_Mann_4_5uL_a	R1_C0	10				3 days	170401_1275_AlDoerr_N32_3d_212min_Mann_3uL_a	N32_C3
				2	170811_1275_N32_IS_SCX2_C0_212min_Mann_4_5uL_b	R1_C0	10				7 days	170401_1275_AlDoerr_N32_7d_212min_Mann_3uL_a	N32_C7
			3	1	170407_1275_N32_IS_SCX3_C0_212min_Mann_4_5uL_a	R1_C0	15		2	Ctrl	0 days	170724_1380_AlDoerr_N33a_t0_212min_Mann_3uL_a	N33_C0
				2	170407_1275_N32_IS_SCX3_C0_212min_Mann_4_5uL_b	R1_C0	15				1 day	170724_1380_AlDoerr_N33a_1d_212min_Mann_3uL_a	N33_C1
			4	1	170306_1275_N32_IS_SCX4_C0_212min_Mann_4_5uL_a	R1_C0	20				3 days	170724_1380_AlDoerr_N33a_3d_212min_Mann_3uL_a	N33_C3
				2	170306_1275_N32_IS_SCX4_C0_212min_Mann_4_5uL_b	R1_C0	20				7 days	170724_1380_AlDoerr_N33a_7d_212min_Mann_3uL_a	N33_C7
		1 day	1	1	170825_1275_N32_IS_SCX1_C1_212min_Mann_4_5uL_a	R1_C1	5			BIC	1 day	170804_1380_N33a_B1_212min_Mann_3uL	N33_B1
				2	170825_1275_N32_IS_SCX1_C1_212min_Mann_4_5uL_b	R1_C1	5				3 days	170804_1380_N33a_B3_212min_Mann_3uL	N33_B3
			2	1	170811_1275_N32_IS_SCX2_C1_212min_Mann_4_5uL_a	R1_C1	10				7 days	170804_1380_N33a_B7_212min_Mann_3uL	N33_B7
				2	170811_1275_N32_IS_SCX2_C1_212min_Mann_4_5uL_b	R1_C1	10			TTX	1 day	170804_1380_N33a_T1_212min_Mann_3uL	N33_T1
			3	1	170407_1275_N32_IS_SCX3_C1_212min_Mann_4_5uL_a	R1_C1	15				3 days	170804_1380_N33a_T3_212min_Mann_3uL	N33_T3
				2	170407_1275_N32_IS_SCX3_C1_212min_Mann_4_5uL_b	R1_C1	15				7 days	170804_1380_N33a_T7_212min_Mann_3uL	N33_T7
			4	1	170307_1275_N32_IS_SCX4_C1_212min_Mann_4_5uL_a	R1_C1	20		3	Ctrl	0 days	181001_LU1N_1580_N34_C0_nonlin180end48_3uL	N34_C0
				2	170307_1275_N32_IS_SCX4_C1_212min_Mann_4_5uL_b	R1_C1	20				1 day	181001_LU1N_1580_N34_C1_nonlin180end48_3uL	N34_C1
		3 days	1	1	170904_1275_N32_IS_SCX1_C3_212min_Mann_4_5uL_a	R1_C3	5				3 days	181001_LU1N_1580_N34_C3_nonlin180end48_3uL	N34_C3
				2	170904_1275_N32_IS_SCX1_C3_212min_Mann_4_5uL_b	R1_C3	5				7 days	181001_LU1N_1580_N34_C7_nonlin180end48_3uL	N34_C7
			2	1	170811_1275_N32_IS_SCX2_C3_212min_Mann_4_5uL_a	R1_C3	10			BIC	1 day	181001_LU1N_1580_N34_B1_nonlin180end48_3uL	N34_B1
				2	170811_1275_N32_IS_SCX2_C3_212min_Mann_4_5uL_b	R1_C3	10				3 days	181001_LU1N_1580_N34_B3_nonlin180end48_3uL	N34_B3
			3	1	170409_1275_N32_IS_SCX3_C3_212min_Mann_4_5uL_a	R1_C3	15				7 days	181001_LU1N_1580_N34_B7_nonlin180end48_3uL	N34_B7
				2	170409_1275_N32_IS_SCX3_C3_212min_Mann_4_5uL_b	R1_C3	15			TTX	1 day	181001_LU1N_1580_N34_T1_nonlin180end48_3uL	N34_T1
			4	1	170308_1275_N32_IS_SCX4_C3_212min_Mann_4_5uL_a	R1_C3	20				3 days	181001_LU1N_1580_N34_T3_nonlin180end48_3uL	N34_T3
				2	170308_1275_N32_IS_SCX4_C3_212min_Mann_4_5uL_b	R1_C3	20				7 days	181001_LU1N_1580_N34_T7_nonlin180end48_3uL	N34_T7
		7 days	1	1	170829_1275_N32_IS_SCX1_C7_212min_Mann_4_5uL_a	R1_C7	5
				2	170829_1275_N32_IS_SCX1_C7_212min_Mann_4_5uL_b	R1_C7	5
			2	1	170811_1275_N32_IS_SCX2_C7_212min_Mann_4_5uL_a	R1_C7	10
				2	170811_1275_N32_IS_SCX2_C7_212min_Mann_4_5uL_b	R1_C7	10
			3	1	170410_1275_N32_IS_SCX3_C7_212min_Mann_4_5uL_a	R1_C7	15
				2	170410_1275_N32_IS_SCX3_C7_212min_Mann_4_5uL_b	R1_C7	15
			4	1	170309_1275_N32_IS_SCX4_C7_212min_Mann_4_5uL_a	R1_C7	20
				2	170309_1275_N32_IS_SCX4_C7_212min_Mann_4_5uL_b	R1_C7	20
	BIC	1 day	1	1	170825_1275_N32_IS_SCX1_B1_212min_Mann_4_5uL_a	R1_B1	5
				2	170825_1275_N32_IS_SCX1_B1_212min_Mann_4_5uL_b	R1_B1	5
			2	1	170811_1275_N32_IS_SCX2_B1_212min_Mann_4_5uL_a	R1_B1	10
				2	170811_1275_N32_IS_SCX2_B1_212min_Mann_4_5uL_b	R1_B1	10
			3	1	170407_1275_N32_IS_SCX3_B1_212min_Mann_4_5uL_a	R1_B1	15
				2	170407_1275_N32_IS_SCX3_B1_212min_Mann_4_5uL_b	R1_B1	15
			4	1	170307_1275_N32_IS_SCX4_B1_212min_Mann_4_5uL_a	R1_B1	20
				2	170307_1275_N32_IS_SCX4_B1_212min_Mann_4_5uL_b	R1_B1	20
		3 days	1	1	170904_1275_N32_IS_SCX1_B3_212min_Mann_4_5uL_a	R1_B3	5
				2	170904_1275_N32_IS_SCX1_B3_212min_Mann_4_5uL_b	R1_B3	5
			2	1	170811_1275_N32_IS_SCX2_B3_212min_Mann_4_5uL_a	R1_B3	10
				2	170811_1275_N32_IS_SCX2_B3_212min_Mann_4_5uL_b	R1_B3	10
			3	1	170409_1275_N32_IS_SCX3_B3_212min_Mann_4_5uL_a	R1_B3	15
				2	170409_1275_N32_IS_SCX3_B3_212min_Mann_4_5uL_b	R1_B3	15
			4	1	170308_1275_N32_IS_SCX4_B3_212min_Mann_4_5uL_a	R1_B3	20
				2	170308_1275_N32_IS_SCX4_B3_212min_Mann_4_5uL_b	R1_B3	20
		7 days	1	1	170829_1275_N32_IS_SCX1_B7_212min_Mann_4_5uL_a	R1_B7	5
				2	170829_1275_N32_IS_SCX1_B7_212min_Mann_4_5uL_b	R1_B7	5
			2	1	170811_1275_N32_IS_SCX2_B7_212min_Mann_4_5uL_a	R1_B7	10
				2	170811_1275_N32_IS_SCX2_B7_212min_Mann_4_5uL_b	R1_B7	10
			3	1	170410_1275_N32_IS_SCX3_B7_212min_Mann_4_5uL_a	R1_B7	15
				2	170410_1275_N32_IS_SCX3_B7_212min_Mann_4_5uL_b	R1_B7	15
			4	1	170309_1275_N32_IS_SCX4_B7_212min_Mann_4_5uL_a	R1_B7	20
				2	170309_1275_N32_IS_SCX4_B7_212min_Mann_4_5uL_b	R1_B7	20
	TTX	1 day	1	1	170825_1275_N32_IS_SCX1_T1_212min_Mann_4_5uL_a	R1_T1	5
				2	170829_1275_N32_IS_SCX1_T1_212min_Mann_4_5uL_b	R1_T1	5
			2	1	170811_1275_N32_IS_SCX2_T1_212min_Mann_4_5uL_a	R1_T1	10
				2	170811_1275_N32_IS_SCX2_T1_212min_Mann_4_5uL_b	R1_T1	10
			3	1	170407_1275_N32_IS_SCX3_T1_212min_Mann_4_5uL_a	R1_T1	15
				2	170407_1275_N32_IS_SCX3_T1_212min_Mann_4_5uL_b	R1_T1	15
			4	1	170307_1275_N32_IS_SCX4_T1_212min_Mann_4_5uL_a	R1_T1	20
				2	170307_1275_N32_IS_SCX4_T1_212min_Mann_4_5uL_b	R1_T1	20
		3 days	1	1	170904_1275_N32_IS_SCX1_T3_212min_Mann_4_5uL_a	R1_T3	5
				2	170904_1275_N32_IS_SCX1_T3_212min_Mann_4_5uL_b	R1_T3	5
			2	1	170811_1275_N32_IS_SCX2_T3_212min_Mann_4_5uL_a	R1_T3	10
				2	170811_1275_N32_IS_SCX2_T3_212min_Mann_4_5uL_b	R1_T3	10
			3	1	170409_1275_N32_IS_SCX3_T3_212min_Mann_4_5uL_a	R1_T3	15
				2	170409_1275_N32_IS_SCX3_T3_212min_Mann_4_5uL_b	R1_T3	15
			4	1	170308_1275_N32_IS_SCX4_T3_212min_Mann_4_5uL_a	R1_T3	20
				2	170308_1275_N32_IS_SCX4_T3_212min_Mann_4_5uL_b	R1_T3	20
		7 days	1	1	170829_1275_N32_IS_SCX1_T7_212min_Mann_4_5uL_a	R1_T7	5
				2	170829_1275_N32_IS_SCX1_T7_212min_Mann_4_5uL_b	R1_T7	5
			2	1	170811_1275_N32_IS_SCX2_T7_212min_Mann_4_5uL_a	R1_T7	10
				2	170811_1275_N32_IS_SCX2_T7_212min_Mann_4_5uL_b	R1_T7	10
			3	1	170410_1275_N32_IS_SCX3_T7_212min_Mann_4_5uL_a	R1_T7	15
				2	170410_1275_N32_IS_SCX3_T7_212min_Mann_4_5uL_b	R1_T7	15
			4	1	170309_1275_N32_IS_SCX4_T7_212min_Mann_4_5uL_a	R1_T7	20
				2	170309_1275_N32_IS_SCX4_T7_212min_Mann_4_5uL_b	R1_T7	20
2	Ctrl	0 days	1	1	180223_1485_N33a_IS_C0_SCX1_212min_3uL_a	R2_C0	25
				2	180223_1485_N33a_IS_C0_SCX1_212min_3uL_b	R2_C0	25
			2	1	180209_1485_N33a_IS_C0_SCX2_212min_3uL_a	R2_C0	30
				2	180209_1485_N33a_IS_C0_SCX2_212min_3uL_b	R2_C0	30
			3	1	180203_1485_N33a_IS_C0_SCX3_212min_2uL_a	R2_C0	35
				2	180203_1485_N33a_IS_C0_SCX3_212min_2uL_b	R2_C0	35
			4	1	180125_1485_N33a_IS_C0_SCX4_212min_2uL_a	R2_C0	40
				2	180125_1485_N33a_IS_C0_SCX4_212min_2uL_b	R2_C0	40
		1 day	1	1	180223_1485_N33a_IS_C1_SCX1_212min_3uL_a	R2_C1	25
				2	180223_1485_N33a_IS_C1_SCX1_212min_3uL_b	R2_C1	25
			2	1	180209_1485_N33a_IS_C1_SCX2_212min_3uL_a	R2_C1	30
				2	180209_1485_N33a_IS_C1_SCX2_212min_3uL_b	R2_C1	30
			3	1	180203_1485_N33a_IS_C1_SCX3_212min_2uL_a	R2_C1	35
				2	180203_1485_N33a_IS_C1_SCX3_212min_2uL_b	R2_C1	35
			4	1	180125_1485_N33a_IS_C1_SCX4_212min_2uL_a	R2_C1	40
				2	180125_1485_N33a_IS_C1_SCX4_212min_2uL_b	R2_C1	40
		3 days	1	1	180223_1485_N33a_IS_C3_SCX1_212min_3uL_a	R2_C3	25
				2	180223_1485_N33a_IS_C3_SCX1_212min_3uL_b	R2_C3	25
			2	1	180209_1485_N33a_IS_C3_SCX2_212min_3uL_a	R2_C3	30
				2	180209_1485_N33a_IS_C3_SCX2_212min_3uL_b	R2_C3	30
			3	1	180203_1485_N33a_IS_C3_SCX3_212min_2uL_a	R2_C3	35
				2	180203_1485_N33a_IS_C3_SCX3_212min_2uL_b	R2_C3	35
			4	1	180125_1485_N33a_IS_C3_SCX4_212min_2uL_a	R2_C3	40
				2	180125_1485_N33a_IS_C3_SCX4_212min_2uL_b	R2_C3	40
		7 days	1	1	180223_1485_N33a_IS_C7_SCX1_212min_2uL_a	R2_C7	25
				2	180223_1485_N33a_IS_C7_SCX1_212min_2uL_b	R2_C7	25
			2	1	180209_1485_N33a_IS_C7_SCX2_212min_2uL_a	R2_C7	30
				2	180209_1485_N33a_IS_C7_SCX2_212min_2uL_b	R2_C7	30
			3	1	180203_1485_N33a_IS_C7_SCX3_212min_2uL_a	R2_C7	35
				2	180203_1485_N33a_IS_C7_SCX3_212min_2uL_b	R2_C7	35
			4	1	180125_1485_N33a_IS_C7_SCX4_212min_2uL_a	R2_C7	40
				2	180125_1485_N33a_IS_C7_SCX4_212min_2uL_b	R2_C7	40
	BIC	1 day	1	1	180223_1485_N33a_IS_B1_SCX1_212min_3uL_a	R2_B1	25
				2	180223_1485_N33a_IS_B1_SCX1_212min_3uL_b	R2_B1	25
			2	1	180209_1485_N33a_IS_B1_SCX2_212min_3uL_a	R2_B1	30
				2	180209_1485_N33a_IS_B1_SCX2_212min_3uL_b	R2_B1	30
			3	1	180203_1485_N33a_IS_B1_SCX3_212min_2uL_a	R2_B1	35
				2	180203_1485_N33a_IS_B1_SCX3_212min_2uL_b	R2_B1	35
			4	1	180125_1485_N33a_IS_B1_SCX4_212min_2uL_a	R2_B1	40
				2	180125_1485_N33a_IS_B1_SCX4_212min_2uL_b	R2_B1	40
		3 days	1	1	180223_1485_N33a_IS_B3_SCX1_212min_3uL_a	R2_B3	25
				2	180223_1485_N33a_IS_B3_SCX1_212min_3uL_b	R2_B3	25
			2	1	180209_1485_N33a_IS_B3_SCX2_212min_3uL_a	R2_B3	30
				2	180209_1485_N33a_IS_B3_SCX2_212min_3uL_b	R2_B3	30
			3	1	180203_1485_N33a_IS_B3_SCX3_212min_2uL_a	R2_B3	35
				2	180203_1485_N33a_IS_B3_SCX3_212min_2uL_b	R2_B3	35
			4	1	180125_1485_N33a_IS_B3_SCX4_212min_2uL_a	R2_B3	40
				2	180125_1485_N33a_IS_B3_SCX4_212min_2uL_b	R2_B3	40
		7 days	1	1	180223_1485_N33a_IS_B7_SCX1_212min_2uL_a	R2_B7	25
				2	180223_1485_N33a_IS_B7_SCX1_212min_2uL_b	R2_B7	25
			2	1	180209_1485_N33a_IS_B7_SCX2_212min_2uL_a	R2_B7	30
				2	180209_1485_N33a_IS_B7_SCX2_212min_2uL_b	R2_B7	30
			3	1	180203_1485_N33a_IS_B7_SCX3_212min_2uL_a	R2_B7	35
				2	180203_1485_N33a_IS_B7_SCX3_212min_2uL_b	R2_B7	35
			4	1	180125_1485_N33a_IS_B7_SCX4_212min_2uL_a	R2_B7	40
				2	180125_1485_N33a_IS_B7_SCX4_212min_2uL_b	R2_B7	40
	TTX	1 day	1	1	180223_1485_N33a_IS_T1_SCX1_212min_3uL_a	R2_T1	25
				2	180223_1485_N33a_IS_T1_SCX1_212min_3uL_b	R2_T1	25
			2	1	180209_1485_N33a_IS_T1_SCX2_212min_3uL_a	R2_T1	30
				2	180209_1485_N33a_IS_T1_SCX2_212min_3uL_b	R2_T1	30
			3	1	180203_1485_N33a_IS_T1_SCX3_212min_2uL_a	R2_T1	35
				2	180203_1485_N33a_IS_T1_SCX3_212min_2uL_b	R2_T1	35
			4	1	180125_1485_N33a_IS_T1_SCX4_212min_2uL_a	R2_T1	40
				2	180125_1485_N33a_IS_T1_SCX4_212min_2uL_b	R2_T1	40
		3 days	1	1	180223_1485_N33a_IS_T3_SCX1_212min_3uL_a	R2_T3	25
				2	180223_1485_N33a_IS_T3_SCX1_212min_3uL_b	R2_T3	25
			2	1	180209_1485_N33a_IS_T3_SCX2_212min_3uL_a	R2_T3	30
				2	180209_1485_N33a_IS_T3_SCX2_212min_3uL_b	R2_T3	30
			3	1	180203_1485_N33a_IS_T3_SCX3_212min_2uL_a	R2_T3	35
				2	180203_1485_N33a_IS_T3_SCX3_212min_2uL_b	R2_T3	35
			4	1	180125_1485_N33a_IS_T3_SCX4_212min_2uL_a	R2_T3	40
				2	180125_1485_N33a_IS_T3_SCX4_212min_2uL_b	R2_T3	40
		7 days	1	1	180223_1485_N33a_IS_T7_SCX1_212min_2uL_a	R2_T7	25
				2	180223_1485_N33a_IS_T7_SCX1_212min_2uL_b	R2_T7	25
			2	1	180209_1485_N33a_IS_T7_SCX2_212min_2uL_a	R2_T7	30
				2	180209_1485_N33a_IS_T7_SCX2_212min_2uL_b	R2_T7	30
			3	1	180203_1485_N33a_IS_T7_SCX3_212min_2uL_a	R2_T7	35
				2	180203_1485_N33a_IS_T7_SCX3_212min_2uL_b	R2_T7	35
			4	1	180125_1485_N33a_IS_T7_SCX4_212min_2uL_a	R2_T7	40
				2	180125_1485_N33a_IS_T7_SCX4_212min_2uL_b	R2_T7	40
3	Ctrl	0 days	1	1	181010_LU1N_1580_N34_SCX1_C0+IS_nonlin180end48_4uL_a	R3_C0	45
				2	181010_LU1N_1580_N34_SCX1_C0+IS_nonlin180end48_4uL_b	R3_C0	45
			2	1	181015_LU1N_1580_N34_SCX2_C0+IS_nonlin180end48_4uL_a	R3_C0	50
				2	181015_LU1N_1580_N34_SCX2_C0+IS_nonlin180end48_4uL_b	R3_C0	50
			3	1	181021_LU1N_1580_N34_SCX3_C0+IS_nonlin180end48_4uL_a	R3_C0	55
				2	181021_LU1N_1580_N34_SCX3_C0+IS_nonlin180end48_4uL_b	R3_C0	55
			4	1	181005_LU1N_1580_N34_SCX4_C0+IS_nonlin180end48_6uL_a	R3_C0	60
				2	181005_LU1N_1580_N34_SCX4_C0+IS_nonlin180end48_6uL_b	R3_C0	60
		1 day	1	1	181010_LU1N_1580_N34_SCX1_C1+IS_nonlin180end48_4uL_a	R3_C1	45
				2	181010_LU1N_1580_N34_SCX1_C1+IS_nonlin180end48_4uL_b	R3_C1	45
			2	1	181015_LU1N_1580_N34_SCX2_C1+IS_nonlin180end48_4uL_a	R3_C1	50
				2	181015_LU1N_1580_N34_SCX2_C1+IS_nonlin180end48_4uL_b	R3_C1	50
			3	1	181021_LU1N_1580_N34_SCX3_C1+IS_nonlin180end48_4uL_a	R3_C1	55
				2	181021_LU1N_1580_N34_SCX3_C1+IS_nonlin180end48_4uL_b	R3_C1	55
			4	1	181005_LU1N_1580_N34_SCX4_C1+IS_nonlin180end48_6uL_a	R3_C1	60
				2	181005_LU1N_1580_N34_SCX4_C1+IS_nonlin180end48_6uL_b	R3_C1	60
		3 days	1	1	181010_LU1N_1580_N34_SCX1_C3+IS_nonlin180end48_4uL_a	R3_C3	45
				2	181010_LU1N_1580_N34_SCX1_C3+IS_nonlin180end48_4uL_b	R3_C3	45
			2	1	181015_LU1N_1580_N34_SCX2_C3+IS_nonlin180end48_4uL_a	R3_C3	50
				2	181015_LU1N_1580_N34_SCX2_C3+IS_nonlin180end48_4uL_b	R3_C3	50
			3	1	181021_LU1N_1580_N34_SCX3_C3+IS_nonlin180end48_4uL_a	R3_C3	55
				2	181021_LU1N_1580_N34_SCX3_C3+IS_nonlin180end48_4uL_b	R3_C3	55
			4	1	181005_LU1N_1580_N34_SCX4_C3+IS_nonlin180end48_6uL_a	R3_C3	60
				2	181005_LU1N_1580_N34_SCX4_C3+IS_nonlin180end48_6uL_b	R3_C3	60
		7 days	1	1	181010_LU1N_1580_N34_SCX1_C7+IS_nonlin180end48_4uL_a	R3_C7	45
				2	181010_LU1N_1580_N34_SCX1_C7+IS_nonlin180end48_4uL_b	R3_C7	45
			2	1	181015_LU1N_1580_N34_SCX2_C7+IS_nonlin180end48_4uL_a	R3_C7	50
				2	181015_LU1N_1580_N34_SCX2_C7+IS_nonlin180end48_4uL_b	R3_C7	50
			3	1	181021_LU1N_1580_N34_SCX3_C7+IS_nonlin180end48_4uL_a	R3_C7	55
				2	181021_LU1N_1580_N34_SCX3_C7+IS_nonlin180end48_4uL_b	R3_C7	55
			4	1	181005_LU1N_1580_N34_SCX4_C7+IS_nonlin180end48_6uL_a	R3_C7	60
				2	181005_LU1N_1580_N34_SCX4_C7+IS_nonlin180end48_6uL_b	R3_C7	60
	BIC	1 day	1	1	181010_LU1N_1580_N34_SCX1_B1+IS_nonlin180end48_4uL_a	R3_B1	45
				2	181010_LU1N_1580_N34_SCX1_B1+IS_nonlin180end48_4uL_b	R3_B1	45
			2	1	181015_LU1N_1580_N34_SCX2_B1+IS_nonlin180end48_4uL_a	R3_B1	50
				2	181015_LU1N_1580_N34_SCX2_B1+IS_nonlin180end48_4uL_b	R3_B1	50
			3	1	181021_LU1N_1580_N34_SCX3_B1+IS_nonlin180end48_4uL_a	R3_B1	55
				2	181021_LU1N_1580_N34_SCX3_B1+IS_nonlin180end48_4uL_b	R3_B1	55
			4	1	181005_LU1N_1580_N34_SCX4_B1+IS_nonlin180end48_6uL_a	R3_B1	60
				2	181005_LU1N_1580_N34_SCX4_B1+IS_nonlin180end48_6uL_b	R3_B1	60
		3 days	1	1	181010_LU1N_1580_N34_SCX1_B3+IS_nonlin180end48_4uL_a	R3_B3	45
				2	181010_LU1N_1580_N34_SCX1_B3+IS_nonlin180end48_4uL_b	R3_B3	45
			2	1	181015_LU1N_1580_N34_SCX2_B3+IS_nonlin180end48_4uL_a	R3_B3	50
				2	181015_LU1N_1580_N34_SCX2_B3+IS_nonlin180end48_4uL_b	R3_B3	50
			3	1	181021_LU1N_1580_N34_SCX3_B3+IS_nonlin180end48_4uL_a	R3_B3	55
				2	181021_LU1N_1580_N34_SCX3_B3+IS_nonlin180end48_4uL_b	R3_B3	55
			4	1	181005_LU1N_1580_N34_SCX4_B3+IS_nonlin180end48_6uL_a	R3_B3	60
				2	181005_LU1N_1580_N34_SCX4_B3+IS_nonlin180end48_6uL_b	R3_B3	60
		7 days	1	1	181010_LU1N_1580_N34_SCX1_B7+IS_nonlin180end48_4uL_a	R3_B7	45
				2	181010_LU1N_1580_N34_SCX1_B7+IS_nonlin180end48_4uL_b	R3_B7	45
			2	1	181015_LU1N_1580_N34_SCX2_B7+IS_nonlin180end48_4uL_a	R3_B7	50
				2	181015_LU1N_1580_N34_SCX2_B7+IS_nonlin180end48_4uL_b	R3_B7	50
			3	1	181021_LU1N_1580_N34_SCX3_B7+IS_nonlin180end48_4uL_a	R3_B7	55
				2	181021_LU1N_1580_N34_SCX3_B7+IS_nonlin180end48_4uL_b	R3_B7	55
			4	1	181005_LU1N_1580_N34_SCX4_B7+IS_nonlin180end48_6uL_a	R3_B7	60
				2	181005_LU1N_1580_N34_SCX4_B7+IS_nonlin180end48_6uL_b	R3_B7	60
	TTX	1 day	1	1	181010_LU1N_1580_N34_SCX1_T1+IS_nonlin180end48_4uL_a	R3_T1	45
				2	181010_LU1N_1580_N34_SCX1_T1+IS_nonlin180end48_4uL_b	R3_T1	45
			2	1	181015_LU1N_1580_N34_SCX2_T1+IS_nonlin180end48_4uL_a	R3_T1	50
				2	181015_LU1N_1580_N34_SCX2_T1+IS_nonlin180end48_4uL_b	R3_T1	50
			3	1	181021_LU1N_1580_N34_SCX3_T1+IS_nonlin180end48_4uL_a	R3_T1	55
				2	181021_LU1N_1580_N34_SCX3_T1+IS_nonlin180end48_4uL_b	R3_T1	55
			4	1	181005_LU1N_1580_N34_SCX4_T1+IS_nonlin180end48_6uL_a	R3_T1	60
				2	181005_LU1N_1580_N34_SCX4_T1+IS_nonlin180end48_6uL_b	R3_T1	60
		3 days	1	1	181010_LU1N_1580_N34_SCX1_T3+IS_nonlin180end48_4uL_a	R3_T3	45
				2	181010_LU1N_1580_N34_SCX1_T3+IS_nonlin180end48_4uL_b	R3_T3	45
			2	1	181015_LU1N_1580_N34_SCX2_T3+IS_nonlin180end48_4uL_a	R3_T3	50
				2	181015_LU1N_1580_N34_SCX2_T3+IS_nonlin180end48_4uL_b	R3_T3	50
			3	1	181021_LU1N_1580_N34_SCX3_T3+IS_nonlin180end48_4uL_a	R3_T3	55
				2	181021_LU1N_1580_N34_SCX3_T3+IS_nonlin180end48_4uL_b	R3_T3	55
			4	1	181005_LU1N_1580_N34_SCX4_T3+IS_nonlin180end48_6uL_a	R3_T3	60
				2	181005_LU1N_1580_N34_SCX4_T3+IS_nonlin180end48_6uL_b	R3_T3	60
		7 days	1	1	181010_LU1N_1580_N34_SCX1_T7+IS_nonlin180end48_4uL_a	R3_T7	45
				2	181010_LU1N_1580_N34_SCX1_T7+IS_nonlin180end48_4uL_b	R3_T7	45
			2	1	181015_LU1N_1580_N34_SCX2_T7+IS_nonlin180end48_4uL_a	R3_T7	50
				2	181015_LU1N_1580_N34_SCX2_T7+IS_nonlin180end48_4uL_b	R3_T7	50
			3	1	181021_LU1N_1580_N34_SCX3_T7+IS_nonlin180end48_4uL_a	R3_T7	55
				2	181021_LU1N_1580_N34_SCX3_T7+IS_nonlin180end48_4uL_b	R3_T7	55
			4	1	181005_LU1N_1580_N34_SCX4_T7+IS_nonlin180end48_6uL_a	R3_T7	60
				2	181005_LU1N_1580_N34_SCX4_T7+IS_nonlin180end48_6uL_b	R3_T7	60

## Sheet: MaxQuant parameter sets
Supplementary Data 3: Sample overview and MaxQuant search parameters
Analysis of "Tripple SILAC" samples for quantification of nascent and pre-existing proteins				Analysis of "Double SILAC" samples to estimate recycling rates
	Parameter	Value			Parameter	Value
Type of analysis	Type	Standard		Type of analysis	Type	Standard
	Multiplicity	3			Multiplicity	1
	Labels	Light: no label			Labels	-
		Semi-heavy: Arg(6); Lys(4)
		Heavy: Arg(10); Lys(8)
		Max. number of labelled amino acids per peptide: 3
Sequences	Database	Rattus norvegicus (UniProt reviewed and unreviewed)		Sequences	Database	Rattus norvegicus (UniProt reviewed and unreviewed)
	Contaminant databased	included			Contaminant databased	included
	Min. peptide length	7			Min. peptide length	7
	Max. peptide mass	4,600 Da			Max. peptide mass	4,600 Da
	Min. peptide length for unspecific search	8			Min. peptide length for unspecific search	8
	Max. peptide length for unspecific search	25			Max. peptide length for unspecific search	25
Digestion	Digestion mode	Specific		Digestion	Digestion mode	Specific
	Enzyme	Trypsin/P			Enzyme	Trypsin/P
	Max. number of missed cleavages	2			Max. number of missed cleavages	2
Modifications	Fixed modification	Carbamidomethylation (C)		Modifications	Fixed modification	Carbamidomethylation (C)
	Variable modifications	Oxidation (M), Acetylation (Protein N-term)			Variable modifications	Oxidation (M), Acetylation (Protein N-term), Arg(+10), Lys(+8)
	Max. number of modifications per peptide	5			Max. number of modifications per peptide	5
Instrument	Instrument type	Orbitrap		Instrument	Instrument type	Orbitrap
	Main search peptide tolerance	4.5 ppm			Main search peptide tolerance	4.5 ppm
	Individual peptide mass tolerance	Active			Individual peptide mass tolerance	Active
	Isotope match tolerance	2 ppm			Isotope match tolerance	2 ppm
	Centroid match tolerance	8 ppm			Centroid match tolerance	8 ppm
	Centroid half width	35 ppm			Centroid half width	35 ppm
	Time valley factor	1.4			Time valley factor	1.4
	Isotope valley factor	1.2			Isotope valley factor	1.2
	Isotope time correlation	0.6			Isotope time correlation	0.6
	Theoretical isotope correlation	0.6			Theoretical isotope correlation	0.6
	Recalibration unit	ppm			Recalibration unit	ppm
	Min. peak length	5			Min. peak length	5
	Max. charge	5			Max. charge	5
	Min. score for re-calibration	70			Min. score for re-calibration	70
	Cut peaks	active			Cut peaks	active
	Gap scans	1			Gap scans	1
	Intensity threshold	0			Intensity threshold	0
Misc.	Re-quantification	Active		Misc.	Re-quantification	No
	Match type	Match from and to (only within datasets; grouped by fractions)			Match type	No
Identification	PSM FDR	0.01		Identification	PSM FDR	0.01
	Protein FDR	0.01			Protein FDR	0.01
	Site decoy fraction	0.01			Site decoy fraction	0.01
	Min. unique peptides for identification	1			Min. razor + unique peptides	1
	Min. score for unmodified peptides	0			Min. score for unmodified peptides	0
	Min. score for modified peptides	40			Min. score for modified peptides	40
	Min. delta score for unmodified peptides	0			Min. delta score for unmodified peptides	0
	Min. delta score for modified peptides	6			Min. delta score for modified peptides	6
	Main search max. combinations	200			Main search max. combinations	200
	Base FDR calculation of delta score	-			Base FDR calculation of delta score	-
	Razor protein FDR	Yes			Razor protein FDR	Yes
	Second peptide identification	Yes			Second peptide identification	No
	Match between runs	Active (only within datasets; grouped by fractions)			Match between runs	No
	Match time window	0.7 min			Match time window	-
	Alignment time window	20 min			Alignment time window	-
Quantification	Min. ratio count	1		Quantification	Min. ratio count	2
	Peptides for quantification	Unique peptides; unmodified and modified peptides			Peptides for quantification	Unique peptides; unmodified and modified peptides
	Label-free quantification	No			Label-free quantification	LFQ; LFQ min. ratio count = 2
	iBAQ value calculation	No			iBAQ value calculation	No
